# Supplementary material for: An adaptive distance-based group contribution method for thermodynamic property prediction
Source: Royal Society of Chemistry journal article supplement (doi:10.1039/c6cp02929a), 2016-01-01
Supplement: c6cp02929a2.xlsx [file c6cp02929a2.xlsx]

## Sheet: alkane
ID	ID in "currentDatabase.xlsx"	SMILES	Formula	Atoms Number	Calculated standard formation of enthalpy at M062X/def2TZVP//B3LYP/6-31G(d) level of theory (unit: kcal/mol)	Geometry	Groups in conventional GA method
							1	2	3	4	5	6	7	8	9	10	11	12	13	14	15	16	17	18	19
							C/C/C1.5/H	C/C/C1.52	C/C/C2.0	C/C/C2.0/H	C/C/H2	C/C/H3	C/C1.5/H2	C/C1.52/H	C/C2.0/H	C/C2.0/H2	C/C2/C1.5	C/C2/C2.0	C/C2/H	C/C2/H2	C/C3	C/C3/H	C/C4	GAUCHE	1-5_interaction
1	5	CCC	C3H8	11	-25.5047	C 0.000000 1.277344 -0.259822 H -0.884612 1.322749 -0.907312 H 0.884612 1.322749 -0.907312 H 0.000000 2.175895 0.368011 C 0.000000 0.000000 0.586210 H 0.877623 0.000000 1.246919 H -0.877623 0.000000 1.246919 C 0.000000 -1.277344 -0.259822 H 0.000000 -2.175895 0.368011 H -0.884612 -1.322749 -0.907312 H 0.884612 -1.322749 -0.907312	0	0	0	0	0	2	0	0	0	0	0	0	0	1	0	0	0	0	0
2	18	CCCC	C4H10	14	-30.6673	C 0.704505 1.835338 0.000000 H 0.190658 2.231621 0.884626 H 0.190658 2.231621 -0.884626 H 1.724309 2.236988 0.000000 C 0.704505 0.303360 0.000000 H 1.255244 -0.063623 -0.878056 H 1.255244 -0.063623 0.878056 C -0.704505 -0.303360 0.000000 H -1.255244 0.063623 -0.878056 H -1.255244 0.063623 0.878056 C -0.704505 -1.835338 0.000000 H -0.190658 -2.231621 0.884626 H -1.724309 -2.236988 0.000000 H -0.19…	0	0	0	0	0	2	0	0	0	0	0	0	0	2	0	0	0	0	0
3	21	CC(C)C	C4H10	14	-32.2883	C -0.435141 1.395712 0.095871 H -0.452653 1.451638 1.192414 H -1.440607 1.643255 -0.265301 H 0.251581 2.170788 -0.265179 C 0.000000 0.000000 -0.372986 H 0.000006 0.000005 -1.473541 C -0.991158 -1.074698 0.095871 H -2.005741 -0.867509 -0.265213 H -0.702812 -2.069239 -0.265282 H -1.030861 -1.117806 1.192417 C 1.426301 -0.321015 0.095869 H 1.754214 -1.303216 -0.265295 H 2.143399 0.426043 -0.265184 H…	0	0	0	0	0	3	0	0	0	0	0	0	0	0	0	1	0	0	0
4	47	CCCCC	C5H12	17	-35.845	C -2.560911 0.323626 0.000000 H -2.607394 0.970851 -0.884601 H -2.607394 0.970850 0.884602 H -3.458969 -0.304770 -0.000001 C -1.283938 -0.522982 -0.000001 H -1.283425 -1.184646 0.878036 H -1.283425 -1.184644 -0.878039 C 0.000000 0.316408 0.000000 H 0.000000 0.979272 0.878510 H 0.000000 0.979273 -0.878509 C 1.283938 -0.522982 0.000000 H 1.283425 -1.184644 -0.878038 H 1.283425 -1.184646 0.878037 C …	0	0	0	0	0	2	0	0	0	0	0	0	0	3	0	0	0	0	0
5	51	CCC(C)C	C5H12	17	-36.8696	C -1.742256 -0.821724 -0.010751 H -1.922228 -0.857823 1.071889 H -1.648515 -1.854923 -0.366329 H -2.631968 -0.384600 -0.479570 C -0.482643 -0.002681 -0.329739 H -0.349146 -0.003316 -1.423210 C 0.764450 -0.664680 0.289758 H 0.773650 -1.725323 0.001711 H 0.667104 -0.649695 1.385801 C 2.101623 -0.032686 -0.113732 H 2.190482 1.001288 0.237340 H 2.943219 -0.594430 0.307619 H 2.221892 -0.024561 -1.2044…	0	0	0	0	0	3	0	0	0	0	0	0	0	1	0	1	0	1	0
6	56	CC(C)(C)C	C5H12	17	-40.1838	C 0.889321 0.889321 0.889321 H 1.535671 0.282560 1.535671 H 0.282560 1.535671 1.535671 H 1.535671 1.535671 0.282560 C 0.000000 0.000000 0.000000 C -0.889321 -0.889321 0.889321 H -1.535671 -0.282560 1.535671 H -1.535671 -1.535671 0.282560 H -0.282560 -1.535671 1.535671 C 0.889321 -0.889321 -0.889321 H 0.282560 -1.535671 -1.535671 H 1.535671 -0.282560 -1.535671 H 1.535671 -1.535671 -0.282560 C -0.8…	0	0	0	0	0	4	0	0	0	0	0	0	0	0	0	0	1	0	0
7	119	CCCCCC	C6H14	20	-40.9476	C -1.414227 2.905083 0.000000 H -0.900497 3.301499 -0.884602 H -0.900497 3.301499 0.884602 H -2.434236 3.306282 0.000000 C -1.414227 1.372954 0.000000 H -1.965398 1.006883 0.877995 H -1.965398 1.006883 -0.877995 C -0.004893 0.766918 0.000000 H 0.546827 1.134100 0.878477 H 0.546827 1.134100 -0.878477 C 0.004893 -0.766918 0.000000 H -0.546827 -1.134100 -0.878477 H -0.546827 -1.134100 0.878477 C 1.4…	0	0	0	0	0	2	0	0	0	0	0	0	0	4	0	0	0	0	0
8	123	CCCC(C)C	C6H14	20	-41.9483	C 2.158797 -1.038262 0.033294 H 1.927533 -2.029222 -0.375554 H 2.248004 -1.140761 1.122907 H 3.140068 -0.736400 -0.352089 C 1.075129 -0.013247 -0.333943 H 1.027373 0.044919 -1.432844 C -0.305208 -0.482864 0.167098 H -0.293645 -0.515801 1.267925 H -0.461374 -1.520579 -0.163436 C -1.498621 0.360991 -0.301923 H -1.481223 0.432726 -1.399129 H -1.403322 1.388403 0.072512 C -2.846192 -0.213221 0.149098…	0	0	0	0	0	3	0	0	0	0	0	0	0	2	0	1	0	1	0
9	129	CCC(C)CC	C6H14	20	-41.2859	C -2.585432 -0.173063 -0.291849 H -2.569458 -0.210592 -1.388477 H -2.798673 0.860561 0.001587 H -3.426358 -0.788597 0.047878 C -1.264298 -0.681121 0.297502 H -1.305088 -0.618252 1.395357 H -1.161923 -1.749281 0.059899 C 0.000001 0.051166 -0.198829 H 0.000003 0.001388 -1.300329 C 1.264300 -0.681115 0.297508 H 1.161927 -1.749278 0.059916 H 1.305092 -0.618234 1.395362 C 2.585433 -0.173062 -0.291851 …	0	0	0	0	0	3	0	0	0	0	0	0	0	2	0	1	0	2	0
10	134	CC(C)C(C)C	C6H14	20	-42.2501	C 0.000010 1.518429 1.254759 H 0.349148 1.042070 2.175866 H -1.085003 1.664723 1.342944 H 0.462302 2.511266 1.204222 C 0.342970 0.696651 -0.000006 H 1.431409 0.522493 -0.000015 C -0.342970 -0.696651 -0.000006 H -1.431409 -0.522493 -0.000015 C 0.000010 -1.518447 -1.254754 H 1.085024 -1.664732 -1.342928 H -0.462273 -2.511288 -1.204204 H -0.349127 -1.042109 -2.175873 C -0.000010 1.518447 -1.254754 H…	0	0	0	0	0	4	0	0	0	0	0	0	0	0	0	2	0	2	0
11	137	CCC(C)(C)C	C6H14	20	-43.9283	C 1.618032 0.989661 -0.000046 H 1.593672 1.636429 0.885962 H 1.593672 1.636347 -0.886113 H 2.578316 0.459293 -0.000021 C 0.436353 -0.000500 0.000000 C -0.878586 0.823914 -0.000030 H -0.865713 1.486486 -0.877558 H -0.865712 1.486551 0.877447 C -2.193477 0.033880 -0.000001 H -2.289029 -0.605019 0.884964 H -3.048488 0.719808 -0.000012 H -2.289041 -0.605062 -0.884933 C 0.528897 -0.885012 -1.258652 H …	0	0	0	0	0	4	0	0	0	0	0	0	0	1	0	0	1	2	0
12	297	CCCCCCC	C7H16	23	-46.1465	C 0.000000 3.844533 -0.352058 H -0.884606 3.891009 -0.999287 H 0.884606 3.891009 -0.999287 H 0.000000 4.742596 0.276338 C 0.000000 2.567600 0.494621 H 0.878012 2.567080 1.156275 H -0.878012 2.567080 1.156275 C 0.000000 1.283728 -0.345173 H 0.878461 1.284880 -1.007873 H -0.878461 1.284880 -1.007873 C 0.000000 0.000000 0.494632 H -0.878470 0.000000 1.157200 H 0.878470 0.000000 1.157200 C 0.000000 -…	0	0	0	0	0	2	0	0	0	0	0	0	0	5	0	0	0	0	0
13	302	CCCCC(C)C	C7H16	23	-47.1022	C 2.825334 -0.907446 -0.045515 H 2.662134 -1.903603 -0.474114 H 2.964558 -1.029958 1.036771 H 3.762407 -0.513882 -0.457252 C 1.646481 0.031306 -0.343720 H 1.552039 0.113722 -1.438003 C 0.330483 -0.566717 0.192986 H 0.388605 -0.627844 1.291018 H 0.249762 -1.604638 -0.162630 C -0.946022 0.186009 -0.206871 H -0.977736 0.291283 -1.302046 H -0.924579 1.207704 0.196484 C -2.229892 -0.507138 0.269195 H …	0	0	0	0	0	3	0	0	0	0	0	0	0	3	0	1	0	1	0
14	309	CCC[C@@H](C)CC	C7H16	23	-46.3378	C 3.104335 -0.439264 -0.263145 H 3.452179 0.548710 0.057577 H 3.106369 -0.452161 -1.360456 H 3.844906 -1.172030 0.077549 C 1.713681 -0.771671 0.290465 H 1.470367 -1.810389 0.026561 H 1.739485 -0.737350 1.390002 C 0.572808 0.138168 -0.212102 H 0.591710 0.112178 -1.314152 C -0.790456 -0.423974 0.242173 H -0.851873 -0.372406 1.340571 H -0.827757 -1.493911 -0.011209 C -2.024263 0.258550 -0.365223 H -…	0	0	0	0	0	3	0	0	0	0	0	0	0	3	0	1	0	2	0
15	317	CCCC(C)(C)C	C7H16	23	-48.8942	C -1.912639 1.225231 -0.000065 H -1.765108 1.855292 -0.886119 H -1.765124 1.855376 0.885932 H -2.956526 0.887836 -0.000059 C -0.942096 0.027064 0.000000 C 0.505847 0.585862 -0.000009 H 0.620255 1.240096 0.877746 H 0.620253 1.240069 -0.877784 C 1.656971 -0.430935 0.000001 H 1.581380 -1.085209 -0.878163 H 1.581376 -1.085202 0.878169 C 3.031762 0.248169 0.000002 H 3.160170 0.884386 0.884520 H 3.8423…	0	0	0	0	0	4	0	0	0	0	0	0	0	2	0	0	1	2	0
16	322	CCC(C)(C)CC	C7H16	23	-47.4438	C 2.625523 -0.194785 -0.000036 H 2.780838 0.431963 0.884963 H 2.780811 0.432082 -0.884954 H 3.413413 -0.956933 -0.000099 C 1.245064 -0.864143 -0.000059 H 1.176557 -1.523671 -0.877344 H 1.176580 -1.523785 0.877141 C 0.000000 0.066843 0.000016 C -1.245066 -0.864142 -0.000058 H -1.176584 -1.523781 0.877145 H -1.176557 -1.523673 -0.877340 C -2.625524 -0.194783 -0.000039 H -2.780809 0.432083 -0.884958…	0	0	0	0	0	4	0	0	0	0	0	0	0	2	0	0	1	4	0
17	326	CC[C@@H](C)C(C)C	C7H16	23	-46.6202	C 1.559638 -1.200371 0.785153 H 0.818242 -1.962030 1.050208 H 1.741977 -0.585821 1.674918 H 2.496350 -1.720466 0.551737 C 1.109168 -0.344307 -0.410503 H 0.991617 -1.022821 -1.269578 C -0.276286 0.336752 -0.215123 H -0.437752 0.951747 -1.115389 C -1.418734 -0.701798 -0.177117 H -1.369945 -1.271130 0.761522 H -1.256024 -1.430478 -0.983968 C -2.825275 -0.109381 -0.330012 H -2.912057 0.469000 -1.2585…	0	0	0	0	0	4	0	0	0	0	0	0	0	1	0	2	0	3	0
18	333	CC(C)CC(C)C	C7H16	23	-48.2835	C 2.458858 0.825426 0.545728 H 2.237278 1.450244 1.419338 H 2.656293 1.496148 -0.300972 H 3.383132 0.273089 0.753563 C 1.297200 -0.129913 0.230507 H 1.154624 -0.773954 1.110315 C 0.000000 0.672608 0.000000 H 0.157234 1.336543 -0.864280 H -0.157234 1.336542 0.864281 C -1.297199 -0.129913 -0.230507 H -1.154624 -0.773954 -1.110315 C -1.651929 -1.031325 0.961966 H -1.777045 -0.437014 1.877033 H -2.59…	0	0	0	0	0	4	0	0	0	0	0	0	0	1	0	2	0	2	0
19	337	CCC(CC)CC	C7H16	23	-45.6095	C 0.000003 2.082434 -0.489090 H -0.883981 1.965103 -1.126382 H 0.883992 1.965104 -1.126376 H 0.000002 3.113496 -0.117173 C 0.000000 1.088895 0.680677 H 0.872342 1.288217 1.315981 H -0.872346 1.288218 1.315976 C 0.000000 -0.409180 0.293906 H 0.000000 -0.971444 1.242521 C -1.263859 -0.840092 -0.481830 H -1.170674 -1.910384 -0.712968 H -1.292437 -0.328995 -1.454369 C -2.589674 -0.610606 0.253221 H -…	0	0	0	0	0	3	0	0	0	0	0	0	0	3	0	1	0	3	0
20	341	CC(C)C(C)(C)C	C7H16	23	-48.3022	C -0.798811 -0.000022 1.534501 H -0.343729 0.886056 1.991122 H -0.343750 -0.886124 1.991094 H -1.860649 -0.000013 1.809868 C -0.645793 0.000000 -0.000112 C 0.858144 0.000000 -0.447874 H 0.835810 0.000001 -1.549201 C 1.641965 1.253142 -0.015898 H 1.726045 1.322460 1.075365 H 2.661991 1.213896 -0.416080 H 1.186547 2.179992 -0.377465 C -1.359430 -1.245473 -0.569560 H -1.233034 -1.313321 -1.657727 H …	0	0	0	0	0	5	0	0	0	0	0	0	0	0	0	1	1	4	0
21	750	CCCCCCCC	C8H18	26	-51.1715	C 0.164173 4.503690 0.000000 H -0.471413 4.634488 0.884601 H -0.471413 4.634488 -0.884601 H 0.904731 5.311762 0.000000 C 0.836391 3.126895 0.000000 H 1.492299 3.039793 -0.877999 H 1.492299 3.039793 0.877999 C -0.164173 1.963952 0.000000 H -0.821052 2.051783 -0.878452 H -0.821052 2.051783 0.878452 C 0.500451 0.581364 0.000000 H 1.157323 0.494669 0.878427 H 1.157323 0.494669 -0.878427 C -0.500451 -…	0	0	0	0	0	2	0	0	0	0	0	0	0	6	0	0	0	0	0
22	755	CCCCCC(C)C	C8H18	26	-52.2486	C 3.387055 -0.990691 -0.014660 H 3.193819 -1.967662 -0.473835 H 3.486597 -1.146007 1.067792 H 4.353038 -0.629420 -0.387345 C 2.260575 0.006929 -0.323959 H 2.204371 0.120522 -1.418089 C 0.903303 -0.544795 0.156696 H 0.924224 -0.636367 1.253921 H 0.787987 -1.568634 -0.228831 C -0.325445 0.274915 -0.261310 H -0.316968 0.409221 -1.353624 H -0.270234 1.283772 0.169881 C -1.652953 -0.371431 0.157027 H …	0	0	0	0	0	3	0	0	0	0	0	0	0	4	0	1	0	1	0
23	763	CCCC[C@H](C)CC	C8H18	26	-51.4855	C 3.677448 -0.362677 0.381577 H 3.623868 -0.349349 1.477575 H 4.011276 0.627792 0.053760 H 4.456169 -1.079773 0.097253 C 2.327474 -0.751596 -0.232620 H 2.408206 -0.742383 -1.329994 H 2.102520 -1.790950 0.044752 C 1.135520 0.133503 0.189072 H 1.099165 0.134351 1.290949 C -0.185213 -0.482287 -0.318662 H -0.202859 -1.545827 -0.038087 H -0.189990 -0.461092 -1.419654 C -1.468152 0.177620 0.205998 H -1…	0	0	0	0	0	3	0	0	0	0	0	0	0	4	0	1	0	2	0
24	772	CCCC(C)CCC	C8H18	26	-51.4385	C 3.791406 -0.753781 0.062410 H 3.676825 -1.784519 -0.295382 H 3.900891 -0.794154 1.153295 H 4.726724 -0.359418 -0.351226 C 2.591695 0.110366 -0.341786 H 2.763879 1.140670 -0.005197 H 2.526243 0.153907 -1.438660 C 1.264281 -0.416095 0.222091 H 1.311208 -0.412566 1.322386 H 1.158878 -1.471197 -0.070989 C 0.000000 0.344870 -0.229909 H -0.000001 0.360675 -1.332206 C -1.264282 -0.416093 0.222092 H -1…	0	0	0	0	0	3	0	0	0	0	0	0	0	4	0	1	0	2	0
25	778	CCCCC(C)(C)C	C8H18	26	-54.077	C -2.558407 1.088859 -0.000029 H -2.473236 1.730291 -0.886099 H -2.473207 1.730368 0.885983 H -3.564222 0.650869 0.000007 C -1.475284 -0.008593 0.000000 C -0.088969 0.689482 -0.000035 H -0.040351 1.351699 0.877704 H -0.040361 1.351639 -0.877820 C 1.155842 -0.209976 -0.000013 H 1.146174 -0.869577 -0.878617 H 1.146154 -0.869565 0.878600 C 2.464654 0.592981 -0.000004 H 2.483851 1.254469 0.877927 H 2…	0	0	0	0	0	4	0	0	0	0	0	0	0	3	0	0	1	2	0
26	784	CCCC(C)(C)CC	C8H18	26	-52.4796	C 3.051749 -0.543173 0.000006 H 3.310077 0.048601 0.884981 H 3.310086 0.048640 -0.884941 H 3.700633 -1.426692 -0.000010 C 1.578735 -0.972156 -0.000011 H 1.400977 -1.610959 -0.877226 H 1.400966 -1.610983 0.877185 C 0.506174 0.153836 -0.000003 C -0.876175 -0.557612 -0.000012 H -0.918620 -1.220778 0.877494 H -0.918624 -1.220747 -0.877542 C -2.136363 0.320940 0.000008 H -2.139052 0.979327 -0.878105 H…	0	0	0	0	0	4	0	0	0	0	0	0	0	3	0	0	1	4	0
27	791	CCC[C@@H](C)C(C)C	C8H18	26	-51.7132	C 2.758354 0.317296 -0.892671 H 3.133361 1.015881 -0.135170 H 2.522493 0.896368 -1.793973 H 3.580788 -0.364650 -1.139847 C 1.533659 -0.466311 -0.393066 H 1.271684 -1.185367 -1.184543 C 0.283781 0.444263 -0.216901 H 0.180597 0.996865 -1.164790 C -1.004936 -0.389199 -0.044623 H -1.012458 -0.860909 0.948881 H -0.990248 -1.214698 -0.772130 C -2.313362 0.393232 -0.231343 H -2.298741 0.892592 -1.210924…	0	0	0	0	0	4	0	0	0	0	0	0	0	2	0	2	0	3	0
28	799	CC[C@H](C)CC(C)C	C8H18	26	-52.7813	C 2.027569 0.931492 1.138335 H 2.033413 0.267645 2.013266 H 1.249355 1.685663 1.298599 H 2.991830 1.453088 1.112176 C 1.801769 0.130906 -0.153254 H 1.775306 0.841975 -0.991396 C 0.474512 -0.655591 -0.137084 H 0.525782 -1.391658 0.680207 H 0.407510 -1.242704 -1.066184 C -0.831370 0.153490 0.016993 H -0.781162 0.714953 0.962367 C -2.028551 -0.815099 0.129149 H -1.789132 -1.576079 0.885065 H -2.1392…	0	0	0	0	0	4	0	0	0	0	0	0	0	2	0	2	0	3	0
29	807	CC(C)CCC(C)C	C8H18	26	-53.4077	C -3.089453 -0.834398 -0.481403 H -3.149556 -1.494066 0.394357 H -2.911027 -1.465134 -1.360629 H -4.069009 -0.356849 -0.603728 C -1.977221 0.210420 -0.305746 H -1.962243 0.839684 -1.209620 C -0.601365 -0.477777 -0.194925 H -0.494067 -1.175825 -1.038804 H -0.592783 -1.096476 0.713996 C 0.601371 0.477777 -0.194934 H 0.592777 1.096507 0.713966 H 0.494086 1.175795 -1.038838 C 1.977227 -0.210426 -0.30…	0	0	0	0	0	4	0	0	0	0	0	0	0	2	0	2	0	2	0
30	811	CC[C@H](C)[C@H](C)CC	C8H18	26	-50.9386	C 2.837024 -1.164969 0.135471 H 3.542739 -0.348350 -0.052105 H 2.760306 -1.755470 -0.786271 H 3.279244 -1.808355 0.904939 C 1.461032 -0.649884 0.577775 H 0.839205 -1.514237 0.843528 H 1.576264 -0.062714 1.499339 C 0.728373 0.199214 -0.484240 H 0.744785 -0.376351 -1.423850 C -0.776117 0.439406 -0.158688 H -1.145022 1.124093 -0.939363 C -1.606859 -0.856719 -0.285232 H -1.360995 -1.540028 0.539312 H…	0	0	0	0	0	4	0	0	0	0	0	0	0	2	0	2	0	4	0
31	816	CCCC(CC)CC	C8H18	26	-50.1928	C 2.154605 -1.988582 -0.315935 H 3.045522 -1.364126 -0.184893 H 1.972359 -2.081821 -1.393800 H 2.396797 -2.986790 0.066844 C 0.928396 -1.409025 0.399805 H 0.091917 -2.106796 0.266790 H 1.117070 -1.369215 1.483085 C 0.503337 -0.002394 -0.079211 H 0.531092 -0.000877 -1.181811 C -0.943141 0.321696 0.357063 H -1.120848 1.401881 0.267288 H -1.049947 0.088858 1.428107 C -2.039792 -0.404941 -0.435091 H …	0	0	0	0	0	3	0	0	0	0	0	0	0	4	0	1	0	3	0
32	823	CC[C@@H](C)C(C)(C)C	C8H18	26	-52.5195	C 1.249712 -1.541053 -0.690360 H 1.070270 -1.493212 -1.771860 H 0.598954 -2.318957 -0.277628 H 2.284723 -1.871555 -0.540210 C 1.022614 -0.163925 -0.028942 C -0.446866 0.320666 -0.302917 H -0.596611 0.207636 -1.389027 C -1.523236 -0.545692 0.396212 H -1.592970 -0.253439 1.453193 H -1.221009 -1.599144 0.394251 C -2.913906 -0.452363 -0.245856 H -2.887185 -0.782989 -1.291645 H -3.632843 -1.087626 0.2…	0	0	0	0	0	5	0	0	0	0	0	0	0	1	0	1	1	5	0
33	829	CCC(C)(C)C(C)C	C8H18	26	-52.5401	C -2.186531 -0.099597 -0.797215 H -2.730705 -0.484858 0.073182 H -2.076864 -0.918631 -1.514597 H -2.823634 0.660117 -1.265419 C -0.834772 0.522391 -0.398174 H -0.390411 0.918504 -1.322864 C 0.199354 -0.512545 0.169398 C 1.545208 0.179120 0.536087 H 2.224621 -0.603817 0.901629 H 1.384610 0.848277 1.391108 C 2.257796 0.959413 -0.576419 H 1.669854 1.815958 -0.924340 H 3.214961 1.349400 -0.211103 H 2…	0	0	0	0	0	5	0	0	0	0	0	0	0	1	0	1	1	6	0
34	835	CC(C)CC(C)(C)C	C8H18	26	-53.3427	C -2.508416 -1.141997 0.056942 H -2.802462 -1.164301 1.114681 H -2.124088 -2.135885 -0.201486 H -3.414995 -0.966746 -0.535064 C -1.454623 -0.051057 -0.195689 H -1.183682 -0.101409 -1.259662 C -0.182508 -0.306460 0.657197 H -0.175901 -1.357900 0.978160 H -0.257820 0.283093 1.583056 C 1.202965 -0.029538 0.008527 C 2.281101 -0.246834 1.089711 H 2.234780 -1.264178 1.497932 H 3.287404 -0.097586 0.6789…	0	0	0	0	0	5	0	0	0	0	0	0	0	1	0	1	1	3	1
35	840	CC(C)C(C)C(C)C	C8H18	26	-51.8595	C -2.572455 0.648685 -0.033089 H -2.694811 0.847363 -1.106422 H -2.523533 1.612492 0.482088 H -3.479743 0.139545 0.312727 C -1.330753 -0.224470 0.226409 H -1.230030 -0.331873 1.317206 C -0.030716 0.445129 -0.309860 H -0.185664 0.598094 -1.391028 C 1.233050 -0.458794 -0.188352 H 0.987702 -1.411246 -0.674966 C 1.633266 -0.775902 1.262155 H 1.923642 0.130099 1.807483 H 2.491982 -1.457620 1.282772 H …	0	0	0	0	0	5	0	0	0	0	0	0	0	0	0	3	0	4	0
36	845	CCC(CC)C(C)C	C8H18	26	-50.5199	C 2.019682 -0.712666 -1.139627 H 1.664106 -0.550771 -2.164420 H 1.889987 -1.776515 -0.906276 H 3.096631 -0.506198 -1.123149 C 1.275326 0.190096 -0.141597 H 1.484504 1.225457 -0.444811 C -0.268666 0.000858 -0.223890 H -0.518538 -0.022181 -1.297586 C -0.743574 -1.341153 0.381696 H -0.778634 -1.254417 1.476649 H -0.007150 -2.125470 0.165738 C -2.108819 -1.814054 -0.134168 H -2.086721 -1.967208 -1.22…	0	0	0	0	0	4	0	0	0	0	0	0	0	2	0	2	0	4	0
37	851	CCC(C)(CC)CC	C8H18	26	-52.2123	C -2.624276 -0.318974 -0.195167 H -2.768189 0.665815 0.263271 H -2.785168 -1.074160 0.581959 H -3.415813 -0.448265 -0.942452 C -1.246409 -0.451858 -0.856887 H -1.194539 -1.424147 -1.367570 H -1.167069 0.301814 -1.651905 C -0.000004 -0.336522 0.066420 C 1.246401 -0.451884 -0.856885 H 1.167069 0.301778 -1.651914 H 1.194523 -1.424179 -1.367554 C 2.624269 -0.319000 -0.195166 H 2.785153 -1.074172 0.58…	0	0	0	0	0	4	0	0	0	0	0	0	0	3	0	0	1	6	0
38	855	CC(C)(C)C(C)(C)C	C8H18	26	-53.5266	C 1.076810 -0.955843 -1.358661 H 0.846972 -2.005108 -1.146670 H 2.074016 -0.741697 -0.958424 H 1.134772 -0.849512 -2.448689 C 0.000000 0.000000 -0.795326 C 0.000000 0.000000 0.795336 C -1.246951 0.719927 1.358658 H -2.169975 0.170399 1.147015 H -1.164235 0.808841 2.448647 H -1.358733 1.733598 0.958118 C -1.366189 -0.454623 -1.358661 H -1.679336 -1.425302 -0.958424 H -2.159961 0.269055 -1.146670 H…	0	0	0	0	0	6	0	0	0	0	0	0	0	0	0	0	2	6	0
39	1915	CCCCCCCCC	C9H20	29	-56.4463	C 5.128246 0.368166 0.000001 H 5.174719 1.015400 0.884604 H 5.174719 1.015403 -0.884602 H 6.026317 -0.260229 0.000000 C 3.851290 -0.478486 0.000000 H 3.850764 -1.140148 -0.878007 H 3.850764 -1.140150 0.878005 C 2.567399 0.361298 0.000000 H 2.568549 1.024012 -0.878456 H 2.568549 1.024010 0.878459 C 1.283676 -0.478536 -0.000001 H 1.283657 -1.141101 0.878438 H 1.283657 -1.141099 -0.878441 C 0.000000…	0	0	0	0	0	2	0	0	0	0	0	0	0	7	0	0	0	0	0
40	1921	CCCCCCC(C)C	C9H20	29	-57.3967	C 4.035312 -0.891690 -0.074826 H 3.876930 -1.864151 -0.556381 H 4.160183 -1.070125 1.001420 H 4.978054 -0.478805 -0.453377 C 2.861244 0.062980 -0.339537 H 2.781225 0.201928 -1.429248 C 1.537834 -0.560060 0.148395 H 1.461269 -1.578385 -0.260670 H 1.581200 -0.677160 1.242542 C 0.267293 0.214010 -0.229765 H 0.250255 0.372654 -1.318678 H 0.286256 1.214521 0.223332 C -1.022983 -0.499457 0.196526 H -1.…	0	0	0	0	0	3	0	0	0	0	0	0	0	5	0	1	0	1	0
41	1930	CCCCC[C@@H](C)CC	C9H20	29	-56.6032	C 4.256349 -0.476033 -0.354924 H 4.630850 0.491685 -0.003885 H 4.219394 -0.440198 -1.451107 H 4.996834 -1.233669 -0.073601 C 2.881028 -0.812813 0.233288 H 2.612091 -1.835221 -0.066978 H 2.946246 -0.827683 1.331632 C 1.737684 0.134674 -0.187488 H 1.717455 0.157768 -1.289548 C 0.382582 -0.428244 0.290195 H 0.362769 -0.427343 1.391191 H 0.319763 -1.484351 -0.011037 C -0.860559 0.300761 -0.239327 H -…	0	0	0	0	0	3	0	0	0	0	0	0	0	5	0	1	0	2	0
42	1940	CCCC[C@H](C)CCC	C9H20	29	-56.5747	C -4.357004 -0.787920 -0.021420 H -4.505673 -0.813330 1.065274 H -4.217465 -1.822414 -0.358939 H -5.281171 -0.411222 -0.474690 C -3.153513 0.084671 -0.395093 H -3.048693 0.112692 -1.489414 H -3.349824 1.117687 -0.080780 C -1.841457 -0.417078 0.224500 H -1.928363 -0.397523 1.322192 H -1.713282 -1.475133 -0.048177 C -0.570483 0.352267 -0.193268 H -0.530414 0.351196 -1.294912 C 0.685180 -0.386481 0.…	0	0	0	0	0	3	0	0	0	0	0	0	0	5	0	1	0	2	0
43	1950	CCCCCC(C)(C)C	C9H20	29	-59.2023	C -3.066313 1.172034 -0.000049 H -2.949856 1.808540 -0.886115 H -2.949846 1.808625 0.885954 H -4.092348 0.783747 -0.000025 C -2.038149 0.022948 0.000001 C -0.619340 0.652520 -0.000025 H -0.538362 1.311548 0.877682 H -0.538370 1.311498 -0.877770 C 0.579786 -0.307242 -0.000005 H 0.536533 -0.965329 -0.878582 H 0.536523 -0.965310 0.878586 C 1.926309 0.430468 -0.000006 H 1.979756 1.091139 0.878369 H 1…	0	0	0	0	0	4	0	0	0	0	0	0	0	4	0	0	1	2	0
44	1957	CCCC[C@H](C)C(C)C	C9H20	29	-56.8656	C -3.267047 0.401391 -0.938823 H -2.987166 0.992231 -1.819657 H -3.640789 1.094953 -0.176104 H -4.103580 -0.247635 -1.224364 C -2.082854 -0.432793 -0.423706 H -1.821553 -1.142123 -1.224141 C -0.810067 0.432264 -0.191647 H -0.662227 1.002179 -1.123183 C 0.445999 -0.446593 -0.002865 H 0.424460 -1.254914 -0.749078 H 0.409272 -0.939595 0.979456 C 1.783096 0.297191 -0.135704 H 1.861795 1.076444 0.6347…	0	0	0	0	0	4	0	0	0	0	0	0	0	3	0	2	0	3	0
45	1966	CCC[C@@H](C)CC(C)C	C9H20	29	-57.8093	C -2.563504 0.469659 1.369198 H -1.864602 1.249302 1.691340 H -2.444544 -0.385575 2.047909 H -3.579003 0.860814 1.504521 C -2.328471 0.046848 -0.088929 H -2.429203 0.941138 -0.720493 C -0.924904 -0.553838 -0.311933 H -0.848401 -0.876898 -1.361761 H -0.848528 -1.471919 0.291044 C 0.292274 0.341210 0.007297 H 0.236403 0.634289 1.066637 C 1.592121 -0.472641 -0.170694 H 1.710843 -0.732169 -1.234342 H…	0	0	0	0	0	4	0	0	0	0	0	0	0	3	0	2	0	3	0
46	1975	CC[C@H](C)CCC(C)C	C9H20	29	-57.7892	C -3.572518 0.746385 -0.670631 H -3.347807 1.321847 -1.576747 H -3.706279 1.460872 0.152384 H -4.531137 0.236814 -0.825389 C -2.453112 -0.255648 -0.350724 H -2.363565 -0.943110 -1.206629 C -1.102630 0.473315 -0.195955 H -1.170286 1.152076 0.666227 H -0.952267 1.114976 -1.077180 C 0.115995 -0.450936 -0.049934 H 0.071949 -1.212387 -0.843060 H 0.060905 -0.999869 0.901136 C 1.485707 0.255962 -0.13149…	0	0	0	0	0	4	0	0	0	0	0	0	0	3	0	2	0	3	0
47	1984	CC(C)CCCC(C)C	C9H20	29	-58.3826	C -3.758779 -0.782297 0.531820 H -3.571643 -1.416487 1.406710 H -3.922713 -1.443722 -0.329212 H -4.690798 -0.232220 0.708710 C -2.585904 0.175213 0.272140 H -2.465996 0.808312 1.165454 C -1.275470 -0.614724 0.082404 H -1.360160 -1.233682 -0.824476 H -1.170763 -1.320493 0.919765 C 0.000000 0.236578 -0.000001 H 0.043929 0.896084 0.877764 H -0.043928 0.896085 -0.877766 C 1.275471 -0.614724 -0.082408…	0	0	0	0	0	4	0	0	0	0	0	0	0	3	0	2	0	2	0
48	1989	CCCCC(C)(C)CC	C9H20	29	-58.4197	C -1.592012 2.162918 0.002750 H -0.602252 2.378909 0.420756 H -2.306659 2.146324 0.833012 H -1.863477 3.005369 -0.643911 C -1.605637 0.853184 -0.795850 H -2.599825 0.725896 -1.247793 H -0.908417 0.947345 -1.639157 C -1.271889 -0.446899 -0.014859 C 0.114300 -0.375510 0.681523 H 0.275855 -1.330115 1.204543 H 0.074078 0.388190 1.471178 C 1.335286 -0.093710 -0.206575 H 1.218756 0.874332 -0.713492 H 1…	0	0	0	0	0	4	0	0	0	0	0	0	0	4	0	0	1	4	0
49	1997	CCC[C@@H](C)[C@H](C)CC	C9H20	29	-56.1576	C 3.609703 -0.513417 -0.751534 H 3.388952 -1.369912 -1.400970 H 3.979820 -0.906915 0.201598 H 4.429804 0.049197 -1.212459 C 2.372426 0.374519 -0.567958 H 2.633718 1.222799 0.079543 H 2.104056 0.806581 -1.542571 C 1.138277 -0.357889 0.003417 H 1.012417 -1.275605 -0.593634 C -0.168314 0.463090 -0.205409 H -0.191637 0.717367 -1.277397 C -1.428284 -0.384795 0.076832 H -1.544695 -0.530941 1.160506 H -…	0	0	0	0	0	4	0	0	0	0	0	0	0	3	0	2	0	4	0
50	2007	CC[C@H](C)C[C@H](C)CC	C9H20	29	-57.0279	C 3.709043 -0.445507 -0.555986 H 3.474194 -1.309958 -1.189866 H 4.010093 -0.826428 0.426024 H 4.580311 0.056993 -0.991720 C 2.515805 0.513016 -0.464693 H 2.777819 1.364138 0.181582 H 2.329925 0.937091 -1.461407 C 1.204179 -0.120715 0.047810 H 1.004619 -0.999382 -0.583850 C 0.045210 0.884874 -0.128086 H 0.031845 1.219638 -1.176901 H 0.280342 1.780281 0.467762 C -1.380436 0.419970 0.243938 H -1.378…	0	0	0	0	0	4	0	0	0	0	0	0	0	3	0	2	0	4	0
51	2013	CCCC(C)(C)CCC	C9H20	29	-58.2707	C -2.970357 -1.628019 -0.218927 H -2.638522 -2.184706 -1.104196 H -3.766042 -0.944135 -0.539484 H -3.411339 -2.347460 0.480639 C -1.807248 -0.862923 0.423763 H -2.170441 -0.348937 1.323034 H -1.052017 -1.582288 0.766844 C -1.170958 0.148002 -0.541784 H -1.956600 0.832215 -0.896512 H -0.828406 -0.393069 -1.435341 C 0.000000 1.012262 -0.000002 C 1.170982 0.148030 0.541772 H 0.828458 -0.393020 1.435…	0	0	0	0	0	4	0	0	0	0	0	0	0	4	0	0	1	4	0
52	2018	CCCCC(CC)CC	C9H20	29	-55.3415	C -2.144591 2.287213 -0.437707 H -2.263529 2.114097 -1.514549 H -1.216228 2.851753 -0.295037 H -2.970662 2.929956 -0.112023 C -2.142922 0.962050 0.334086 H -2.072709 1.162785 1.413608 H -3.114876 0.475881 0.181975 C -1.013236 -0.015668 -0.060968 H -0.959212 -0.037218 -1.162331 C 0.355085 0.468337 0.469791 H 0.403948 0.269339 1.551704 H 0.424371 1.559233 0.363323 C 1.577447 -0.153714 -0.220608 H 1…	0	0	0	0	0	3	0	0	0	0	0	0	0	5	0	1	0	3	0
53	2026	CCCC(CC)CCC	C9H20	29	-55.3008	C -3.452521 -1.482340 0.064242 H -3.694650 -1.327028 1.122925 H -3.083527 -2.510108 -0.041802 H -4.385568 -1.403244 -0.505512 C -2.411990 -0.466970 -0.420597 H -2.219594 -0.624157 -1.491562 H -2.829732 0.544713 -0.333012 C -1.083791 -0.561241 0.344232 H -0.698937 -1.583666 0.229672 H -1.271710 -0.431321 1.421518 C -0.001556 0.450592 -0.095754 H -0.001074 0.485416 -1.198052 C 1.403775 -0.000831 0.…	0	0	0	0	0	3	0	0	0	0	0	0	0	5	0	1	0	3	0
54	2033	CCC[C@H](C)C(C)(C)C	C9H20	29	-57.6576	C -1.442026 -1.631599 -0.760244 H -0.630203 -2.291217 -0.436382 H -1.343667 -1.486587 -1.843502 H -2.383673 -2.164702 -0.581068 C -1.439208 -0.277645 -0.017211 C -0.105893 0.493948 -0.326592 H -0.002873 0.474371 -1.423675 C 1.153716 -0.188009 0.262057 H 1.044671 -1.279272 0.237825 H 1.249744 0.080838 1.324214 C 2.461084 0.165900 -0.463785 H 2.611772 1.253438 -0.466809 H 2.376488 -0.131847 -1.5186…	0	0	0	0	0	5	0	0	0	0	0	0	0	2	0	1	1	5	0
55	2040	CC[C@@H](C)CC(C)(C)C	C9H20	29	-58.0464	C -1.621433 -1.321821 0.991519 H -0.828069 -1.246323 1.743960 H -1.478285 -2.263823 0.447439 H -2.575943 -1.388740 1.528094 C -1.620342 -0.118799 0.026924 C -0.287039 -0.063717 -0.770485 H -0.388875 0.693463 -1.561769 H -0.190775 -1.025124 -1.294988 C 1.021279 0.215037 0.020320 H 0.848217 -0.009515 1.083236 C 2.149543 -0.725955 -0.456164 H 2.340995 -0.540055 -1.523827 H 1.784817 -1.760446 -0.3909…	0	0	0	0	0	5	0	0	0	0	0	0	0	2	0	1	1	4	1
56	2047	CC(C)CCC(C)(C)C	C9H20	29	-60.1617	C -2.766410 1.015411 -0.610127 H -2.668796 1.059757 -1.702095 H -2.585611 2.023871 -0.217519 H -3.804713 0.747751 -0.378189 C -1.781679 -0.004351 -0.003243 C -0.342482 0.441600 -0.380766 H -0.213195 1.476223 -0.034538 H -0.275673 0.479908 -1.478942 C 0.816157 -0.417445 0.148910 H 0.653344 -1.465797 -0.134772 H 0.829585 -0.396789 1.248207 C 2.210175 0.002556 -0.364409 H 2.170702 0.011163 -1.465090…	0	0	0	0	0	5	0	0	0	0	0	0	0	2	0	1	1	3	0
57	2051	CCCC(C)(C)C(C)C	C9H20	29	-57.6132	C -2.567150 0.460869 -0.806685 H -3.200828 0.240517 0.060484 H -2.685369 -0.355601 -1.525604 H -2.966406 1.368060 -1.275600 C -1.097781 0.683234 -0.400655 H -0.557090 0.943000 -1.322346 C -0.393381 -0.599374 0.167009 C 1.089250 -0.310348 0.544391 H 1.522670 -1.253164 0.910272 H 1.116499 0.374071 1.403308 C 2.009856 0.245464 -0.552754 H 1.640766 1.218739 -0.901061 H 1.996304 -0.417409 -1.427578 C …	0	0	0	0	0	5	0	0	0	0	0	0	0	2	0	1	1	6	0
58	2058	CC[C@@H](C)[C@H](C)C(C)C	C9H20	29	-56.3815	C -1.715289 -1.790093 -0.264738 H -0.915252 -2.359020 0.218736 H -1.584274 -1.884869 -1.351081 H -2.662927 -2.276358 -0.004798 C -1.735331 -0.311668 0.162164 H -1.782561 -0.280849 1.261275 C -0.463554 0.468063 -0.285523 H -0.484567 0.482609 -1.388063 C 0.873687 -0.235173 0.100402 H 0.823721 -1.252446 -0.310924 C 2.090289 0.434668 -0.579892 H 2.332640 1.378343 -0.072894 H 1.815861 0.703656 -1.6098…	0	0	0	0	0	5	0	0	0	0	0	0	0	1	0	3	0	5	0
59	2067	CC(C)C[C@H](C)C(C)C	C9H20	29	-57.9959	C 2.944302 -0.883367 -0.616136 H 2.599198 -1.812393 -1.086229 H 3.312166 -1.132868 0.386424 H 3.801149 -0.515572 -1.193294 C 1.825837 0.170662 -0.569818 H 1.558353 0.396147 -1.613654 C 0.529267 -0.381402 0.093737 H 0.345214 -1.352494 -0.388958 C -0.682709 0.526440 -0.211070 H -0.698290 0.738195 -1.291692 H -0.535537 1.496494 0.284978 C -2.076277 -0.004730 0.189129 H -2.078939 -0.192230 1.272534 C…	0	0	0	0	0	5	0	0	0	0	0	0	0	1	0	3	0	4	0
60	2077	CCC[C@@H](CC)C(C)C	C9H20	29	-55.6995	C 1.405477 -1.897058 -1.125484 H 1.351612 -1.514533 -2.151948 H 0.528484 -2.535078 -0.961427 H 2.291539 -2.539330 -1.054301 C 1.480064 -0.748697 -0.105364 H 2.395034 -0.186291 -0.338252 C 0.290261 0.244888 -0.259183 H 0.180423 0.426031 -1.341181 C -1.051045 -0.339008 0.243976 H -1.103469 -0.243915 1.338561 H -1.091456 -1.416489 0.034913 C -2.298157 0.307791 -0.377636 H -2.263285 0.175410 -1.46844…	0	0	0	0	0	4	0	0	0	0	0	0	0	3	0	2	0	4	0
61	2086	CCC(CC)CC(C)C	C9H20	29	-56.3205	C -3.106816 -0.223949 -0.819655 H -2.956605 -0.679111 -1.805936 H -3.356339 0.833915 -0.976321 H -3.977262 -0.704077 -0.356568 C -1.855358 -0.367398 0.060423 H -1.648835 -1.442573 0.166849 C -0.641839 0.302165 -0.620191 H -0.813157 1.387874 -0.611385 H -0.624299 0.012053 -1.681937 C 0.748976 -0.011907 -0.021844 H 0.680846 0.039191 1.076034 C 1.791916 1.037339 -0.469630 H 1.725445 1.156032 -1.5614…	0	0	0	0	0	4	0	0	0	0	0	0	0	3	0	2	0	4	0
62	2093	CCCC(C)(CC)CC	C9H20	29	-57.1756	C -2.964826 -0.539112 -0.525332 H -3.264008 0.446377 -0.151235 H -3.190158 -1.273669 0.255531 H -3.607350 -0.769711 -1.383049 C -1.489891 -0.573470 -0.946706 H -1.273674 -1.557025 -1.387880 H -1.342338 0.151149 -1.758751 C -0.427474 -0.308029 0.158509 C 0.959542 -0.347763 -0.544406 H 0.950512 0.359615 -1.385984 H 1.075005 -1.342756 -1.000349 C 2.203106 -0.060845 0.310744 H 2.245775 -0.750735 1.16…	0	0	0	0	0	4	0	0	0	0	0	0	0	4	0	0	1	6	0
63	2100	CC[C@@H](C)C(CC)CC	C9H20	29	-55.0193	C -3.289857 -0.108628 -0.602884 H -3.412590 0.955003 -0.843913 H -3.697019 -0.270409 0.401115 H -3.910488 -0.680143 -1.302688 C -1.819518 -0.533316 -0.705662 H -1.736170 -1.597492 -0.444158 H -1.504387 -0.453158 -1.755492 C -0.846219 0.298165 0.159298 H -1.020363 1.350049 -0.111517 C 0.640255 -0.015044 -0.191051 H 0.694201 -0.061447 -1.291278 C 1.108702 -1.389770 0.343236 H 0.288763 -2.114690 0.2…	0	0	0	0	0	4	0	0	0	0	0	0	0	3	0	2	0	5	0
64	2108	CC[C@H](C)C(C)(C)CC	C9H20	29	-56.6312	C 2.263649 -1.378342 -0.804470 H 2.374873 -0.922945 -1.794611 H 1.474378 -2.135042 -0.874680 H 3.199458 -1.903671 -0.580803 C 1.971589 -0.332011 0.279393 H 1.932228 -0.831749 1.255483 H 2.827505 0.355250 0.337363 C 0.692882 0.537345 0.099229 C -0.597550 -0.355102 0.000967 H -0.510867 -0.909474 -0.946038 C -1.909756 0.464083 -0.086601 H -1.755723 1.357789 -0.701393 H -2.180040 0.827477 0.914397 C …	0	0	0	0	0	5	0	0	0	0	0	0	0	2	0	1	1	7	0
65	2116	CCC(C)(C)C(C)(C)C	C9H20	29	-56.6819	C 2.117293 0.976813 -0.109489 H 1.950987 1.747784 0.650911 H 2.079255 1.458846 -1.091629 H 3.138350 0.601019 0.028309 C 1.111293 -0.192696 0.004609 C -0.396273 0.332043 -0.007799 C -1.376680 -0.861787 -0.223497 H -1.090672 -1.689975 0.437281 H -1.252455 -1.235602 -1.247095 C -2.870035 -0.580504 0.001949 H -3.241297 0.237918 -0.625078 H -3.458016 -1.471252 -0.248367 H -3.090440 -0.327843 1.044315 …	0	0	0	0	0	6	0	0	0	0	0	0	0	1	0	0	2	8	0
66	2121	CC(C)(C)CC(C)(C)C	C9H20	29	-57.3041	C -2.434965 0.323486 1.152881 H -2.281809 1.325988 1.571007 H -2.381308 -0.395193 1.980165 H -3.451014 0.283480 0.741459 C -1.385637 0.003305 0.062841 C -0.000018 -0.000090 0.785123 H 0.015767 0.873226 1.453962 H -0.015833 -0.873562 1.453758 C 1.385634 -0.003319 0.062903 C 1.509794 -1.068280 -1.043285 H 0.870094 -0.846107 -1.903615 H 2.543259 -1.112411 -1.409783 H 1.247341 -2.066573 -0.673828 C -…	0	0	0	0	0	6	0	0	0	0	0	0	0	1	0	0	2	4	2
67	2124	CC(C)[C@H](C)C(C)(C)C	C9H20	29	-56.6942	C -1.358307 -0.005657 1.553413 H -1.156023 1.025711 1.864894 H -0.670066 -0.664538 2.093519 H -2.374220 -0.253439 1.885573 C -1.242188 -0.179750 0.025837 C 0.158012 0.260409 -0.542010 H 0.136012 -0.068036 -1.592700 C 1.389099 -0.463336 0.101952 H 1.053542 -1.444265 0.461142 C 2.472637 -0.730471 -0.958212 H 2.836674 0.205142 -1.402174 H 3.337683 -1.242246 -0.519151 H 2.089542 -1.357235 -1.772169 C…	0	0	0	0	0	6	0	0	0	0	0	0	0	0	0	2	1	6	1
68	2130	CC(C)C(C)(C)C(C)C	C9H20	29	-55.9883	C 1.550701 -1.474856 0.871494 H 0.724638 -2.175263 1.027284 H 1.754271 -0.979099 1.828232 H 2.437069 -2.069776 0.621080 C 1.268682 -0.455132 -0.248168 H 1.062129 -1.027646 -1.162551 C 0.000000 0.447107 0.000001 C -1.268682 -0.455134 0.248169 H -1.062131 -1.027645 1.162554 C -2.562892 0.334357 0.529418 H -2.905085 0.893387 -0.349234 H -3.366377 -0.361421 0.798760 H -2.456112 1.040985 1.357642 C 2.…	0	0	0	0	0	6	0	0	0	0	0	0	0	0	0	2	1	8	0
69	2134	CCC(CC)C(C)(C)C	C9H20	29	-55.5917	C 1.821858 1.230037 -0.425473 H 1.530658 2.031517 0.261246 H 1.526990 1.529749 -1.438780 H 2.916753 1.166063 -0.405888 C 1.200457 -0.130119 -0.041312 C -0.366981 -0.063188 -0.146123 H -0.580912 0.077819 -1.218016 C -1.065279 -1.379827 0.273471 H -1.084963 -1.447362 1.369928 H -0.491215 -2.246221 -0.073418 C -2.495099 -1.510622 -0.267319 H -2.500518 -1.515220 -1.364414 H -2.960445 -2.443565 0.0714…	0	0	0	0	0	5	0	0	0	0	0	0	0	2	0	1	1	6	0
70	2139	CCC(C(C)C)C(C)C	C9H20	29	-55.3284	C 1.664448 -1.291786 1.139024 H 0.869290 -1.895794 1.590141 H 1.909929 -0.487453 1.843101 H 2.552530 -1.929031 1.050621 C 1.258044 -0.739772 -0.237422 H 1.037948 -1.601475 -0.880533 C -0.027030 0.140241 -0.206827 H -0.196892 0.445272 -1.252819 C -1.305019 -0.638920 0.224215 H -1.209817 -0.873264 1.295501 C -2.571954 0.218439 0.053043 H -2.728526 0.476622 -1.002754 H -3.458484 -0.330022 0.393050 H…	0	0	0	0	0	5	0	0	0	0	0	0	0	1	0	3	0	5	0
71	2145	CCC(C)(CC)C(C)C	C9H20	29	-56.1545	C -2.273497 0.888889 0.253059 H -1.911109 1.912915 0.384222 H -2.536787 0.497121 1.242855 H -3.201683 0.944893 -0.327999 C -1.256923 -0.015151 -0.469823 H -1.042315 0.459282 -1.438513 C 0.129049 -0.146844 0.264919 C 1.104630 -0.929870 -0.665144 H 1.065738 -0.490896 -1.671746 H 0.731496 -1.954997 -0.774560 C 2.573850 -1.011920 -0.226192 H 2.682410 -1.445165 0.774416 H 3.135785 -1.649979 -0.918246 …	0	0	0	0	0	5	0	0	0	0	0	0	0	2	0	1	1	8	0
72	2151	CCC(CC)(CC)CC	C9H20	29	-56.1609	C 0.000000 2.624670 0.256701 H -0.884193 2.777563 -0.372094 H 0.884193 2.777563 -0.372094 H 0.000000 3.416047 1.015304 C 0.000000 1.246368 0.930787 H 0.871698 1.181862 1.595323 H -0.871698 1.181862 1.595323 C 0.000000 0.000000 0.000000 C 0.000000 -1.246368 0.930787 H -0.871698 -1.181862 1.595323 H 0.871698 -1.181862 1.595323 C 0.000000 -2.624670 0.256701 H 0.884193 -2.777563 -0.372094 H 0.000000 …	0	0	0	0	0	4	0	0	0	0	0	0	0	4	0	0	1	8	0
73	2529	CCCCCCCCCC	C10H22	32	-61.582	C 5.778762 -0.286399 0.000000 H 5.840950 -0.932316 -0.884602 H 5.840950 -0.932314 0.884604 H 6.661302 0.363630 0.000000 C 4.481616 0.528984 -0.000001 H 4.465024 1.190440 0.878004 H 4.465024 1.190438 -0.878007 C 3.218493 -0.341727 0.000000 H 3.235735 -1.004220 0.878457 H 3.235735 -1.004221 -0.878455 C 1.914751 0.466684 -0.000001 H 1.898651 1.129054 -0.878437 H 1.898651 1.129056 0.878435 C 0.651834…	0	0	0	0	0	2	0	0	0	0	0	0	0	8	0	0	0	0	0
74	2535	CCCCCCCC(C)C	C10H22	32	-62.5341	C -4.632321 -0.950605 -0.050913 H -4.733872 -1.154638 1.023239 H -4.460444 -1.908719 -0.556019 H -5.590833 -0.551752 -0.404058 C -3.485205 0.036372 -0.315281 H -3.427947 0.200367 -1.402942 C -2.139409 -0.566210 0.135800 H -2.160908 -0.708710 1.227583 H -2.046541 -1.573070 -0.297545 C -0.893928 0.245834 -0.246063 H -0.928434 1.235333 0.229740 H -0.899362 0.428943 -1.331256 C 0.419835 -0.445991 0.1…	0	0	0	0	0	3	0	0	0	0	0	0	0	6	0	1	0	1	0
75	2545	CCCCCC[C@@H](C)CC	C10H22	32	-61.7635	C -4.858784 -0.387815 0.439131 H -5.217200 0.577018 0.064175 H -4.793941 -0.316164 1.532261 H -5.624928 -1.134860 0.201589 C -3.507351 -0.780048 -0.169726 H -3.257082 -1.798431 0.158996 C -2.330318 0.150850 0.190912 H -2.282198 0.210484 1.290731 C -1.002157 -0.463025 -0.299539 H -1.009651 -0.499467 -1.400097 H -0.958656 -1.509766 0.035891 C 0.271840 0.250455 0.174921 H 0.252527 0.335355 1.272003 …	0	0	0	0	0	3	0	0	0	0	0	0	0	6	0	1	0	2	0
76	2556	CCCCC[C@H](C)CCC	C10H22	32	-61.6843	C -4.886107 -0.970231 -0.009818 H -5.019443 -1.031989 1.077407 H -4.689601 -1.985673 -0.375649 H -5.836605 -0.638020 -0.442984 C -3.741332 -0.018149 -0.373779 H -3.652022 0.043896 -1.468073 C -2.394136 -0.456235 0.218097 H -2.206770 -1.497511 -0.083397 C -1.176369 0.397845 -0.193493 H -1.150082 0.426940 -1.295172 C 0.127140 -0.277399 0.283180 H 0.103881 -1.333104 -0.024860 H 0.144409 -0.285232 1.…	0	0	0	0	0	3	0	0	0	0	0	0	0	6	0	1	0	2	0
77	2567	CCCCC(C)CCCC	C10H22	32	-61.7189	C 5.125449 -0.210427 -0.379845 H 5.333297 0.817245 -0.056895 H 5.108508 -0.214057 -1.476806 H 5.965624 -0.836512 -0.058056 C 3.798079 -0.714260 0.195991 H 3.636515 -1.756617 -0.113873 C 2.591791 0.133150 -0.231271 H 2.527494 0.140746 -1.330048 C 1.264191 -0.372404 0.350701 H 1.158887 -1.437982 0.098704 C 0.000000 0.369509 -0.132656 H 0.000001 0.339640 -1.234589 C -1.264191 -0.372406 0.350700 H -1…	0	0	0	0	0	3	0	0	0	0	0	0	0	6	0	1	0	2	0
78	2574	CCCCCC(CC)CC	C10H22	32	-60.4924	C -2.646769 2.321250 -0.421520 H -2.790604 2.148966 -1.495455 H -1.701987 2.862585 -0.298024 H -3.450102 2.985175 -0.081750 C -2.663416 0.998050 0.353460 H -2.567901 1.199228 1.430956 C -1.565850 -0.008142 -0.060247 H -1.532969 -0.033155 -1.162380 C -0.176269 0.442861 0.443693 H -0.081980 1.531453 0.333280 C 1.017015 -0.210998 -0.268243 H 0.958141 0.011321 -1.344230 C 2.374855 0.258706 0.270595 H…	0	0	0	0	0	3	0	0	0	0	0	0	0	6	0	1	0	3	0
79	2583	CCCC[C@H](CC)CCC	C10H22	32	-60.4249	C -3.609373 -2.025015 -0.025766 H -4.433706 -1.310251 -0.141054 H -3.578951 -2.325183 1.028997 H -3.854668 -2.914265 -0.617819 C -2.276328 -1.409510 -0.464952 H -1.484011 -2.163785 -0.369883 C -1.908355 -0.149635 0.332049 H -1.883920 -0.389966 1.406420 C -0.563919 0.503165 -0.060929 H -0.504249 0.512994 -1.162062 C 0.632253 -0.319523 0.469732 H 0.415222 -1.391048 0.364657 C 1.973623 -0.036835 -0.…	0	0	0	0	0	3	0	0	0	0	0	0	0	6	0	1	0	3	0
80	2594	CCCCCCC(C)(C)C	C10H22	32	-64.3747	C -3.694161 1.074080 -0.000037 H -3.609060 1.715531 -0.886099 H -3.609053 1.715600 0.885975 H -4.699920 0.635952 -0.000015 C -2.610865 -0.023212 0.000001 C -1.224673 0.675168 -0.000022 H -1.176192 1.337373 0.877697 C 0.020218 -0.224493 -0.000009 H 0.009464 -0.883904 0.878548 C 1.328763 0.578998 -0.000006 H 1.348464 1.241373 0.878357 C 2.586965 -0.298571 -0.000004 H 2.568690 -0.961013 -0.878491 H …	0	0	0	0	0	4	0	0	0	0	0	0	0	5	0	0	1	2	0
81	2602	CCCCC[C@H](C)C(C)C	C10H22	32	-61.9869	C -2.991416 -1.335688 0.816568 H -3.349072 -0.702335 1.637274 H -2.145829 -1.923160 1.190568 H -3.797599 -2.037845 0.572701 C -2.615133 -0.500841 -0.418948 C -1.395592 0.440749 -0.198798 C -0.090301 -0.360275 0.001120 H -0.102624 -0.849547 0.985868 C 1.200962 0.461229 -0.129157 H 1.230754 1.243721 0.641242 C 2.471828 -0.391818 -0.018011 H 2.455262 -1.172641 -0.793190 H 2.470479 -0.922949 0.945751…	0	0	0	0	0	4	0	0	0	0	0	0	0	4	0	2	0	3	0
82	2612	CCCC[C@H](C)CC(C)C	C10H22	32	-62.9439	C 3.037857 0.476089 1.441418 H 2.890290 -0.379659 2.113843 H 2.320476 1.252407 1.729128 H 4.043740 0.872112 1.625598 C 2.875699 0.051987 -0.026233 C 1.487391 -0.555334 -0.316726 C 0.252056 0.334374 -0.057991 H 0.255981 0.630179 1.002037 C -1.033790 -0.486730 -0.295598 H -0.942768 -1.439269 0.247053 C -2.341212 0.192326 0.136048 H -2.501419 1.111996 -0.442942 H -2.258290 0.504883 1.188133 C -3.570…	0	0	0	0	0	4	0	0	0	0	0	0	0	4	0	2	0	3	0
83	2622	CCC[C@@H](C)CCC(C)C	C10H22	32	-62.8682	C 4.118156 0.391108 -0.840656 H 4.345603 1.218669 -0.155709 H 3.911306 0.823686 -1.826957 H 5.021350 -0.224850 -0.926690 C 2.927244 -0.433094 -0.328899 C 1.653312 0.434705 -0.272204 C 0.364163 -0.333654 0.057053 H 0.311266 -1.218967 -0.594191 C -0.940142 0.474092 -0.115156 H -0.953254 0.865523 -1.145621 C -2.161753 -0.455559 0.042857 H -2.198982 -0.826913 1.078988 H -2.008191 -1.342778 -0.589268 …	0	0	0	0	0	4	0	0	0	0	0	0	0	4	0	2	0	3	0
84	2632	CC[C@H](C)CCCC(C)C	C10H22	32	-62.8542	C -3.359366 1.045453 -1.047740 H -3.404563 0.427167 -1.954380 H -2.571067 1.791949 -1.192104 H -4.311728 1.582929 -0.966150 C -3.112195 0.174753 0.193853 C -1.788224 -0.611093 0.111385 C -0.515418 0.247195 0.066332 H -0.511941 0.867366 -0.840720 C 0.767223 -0.597251 0.095544 H 0.708748 -1.344594 -0.709560 C 2.085054 0.189170 -0.065251 H 2.010175 0.775666 -0.995801 C 3.267067 -0.789353 -0.230425 H…	0	0	0	0	0	4	0	0	0	0	0	0	0	4	0	2	0	3	0
85	2642	CC(C)CCCCC(C)C	C10H22	32	-63.5921	C 4.390204 0.828388 -0.446404 H 4.462381 1.494616 0.423460 H 4.227909 1.454798 -1.331804 H 5.359359 0.328381 -0.561597 C 3.254572 -0.189951 -0.264131 C 1.894850 0.529889 -0.161441 C 0.663317 -0.386474 -0.164584 H 0.700849 -1.041466 -1.048174 C -0.663315 0.386473 -0.164592 H -0.700841 1.041456 -1.048190 C -1.894848 -0.529890 -0.161449 H -1.809326 -1.233012 -1.003195 C -3.254570 0.189949 -0.264157 …	0	0	0	0	0	4	0	0	0	0	0	0	0	4	0	2	0	2	0
86	2647	CCCCCC(C)(C)CC	C10H22	32	-62.799	C -4.117968 -0.597132 -0.000035 H -4.385769 -0.009401 -0.884890 H -4.385733 -0.009692 0.885023 H -4.752651 -1.490913 -0.000170 C -2.638274 -1.002515 -0.000129 C -1.583822 0.140490 0.000013 C -0.190224 -0.549129 -0.000039 H -0.138311 -1.211470 0.877392 C 1.055218 0.350241 0.000008 H 1.047507 1.009399 0.878585 C 2.362030 -0.456198 -0.000025 H 2.381515 -1.118749 0.878330 C 3.622248 0.418679 0.000009…	0	0	0	0	0	4	0	0	0	0	0	0	0	5	0	0	1	4	0
87	2656	CCCC[C@H](C)[C@H](C)CC	C10H22	32	-61.2209	C -3.717688 -1.435804 -0.340634 H -4.310511 -0.758985 -0.968877 H -4.093225 -1.350505 0.684928 H -3.917251 -2.459817 -0.676938 C -2.221582 -1.110935 -0.436466 C -1.857946 0.346175 -0.075301 C -0.408655 0.710090 -0.517007 H -0.313529 0.355947 -1.556042 C 0.684116 -0.005466 0.307595 H 0.413830 -1.063095 0.429943 C 2.092828 0.057419 -0.302188 H 2.060405 -0.330747 -1.331557 C 3.133582 -0.734118 0.501…	0	0	0	0	0	4	0	0	0	0	0	0	0	4	0	2	0	4	0
88	2667	CCC[C@@H](C)C[C@H](C)CC	C10H22	32	-62.2759	C -4.370959 -0.324001 -0.348878 H -4.439325 0.499669 -1.070766 H -4.697990 0.059471 0.623764 H -5.090338 -1.092353 -0.654865 C -2.949734 -0.897051 -0.297480 C -1.841605 0.127479 0.029085 C -0.458346 -0.527756 -0.174748 H -0.379984 -1.381040 0.516581 C 0.790500 0.362211 0.008815 H 0.786442 0.757942 1.035565 C 2.062833 -0.500013 -0.139110 H 1.948942 -1.399042 0.484648 C 3.378509 0.190544 0.247217 H…	0	0	0	0	0	4	0	0	0	0	0	0	0	4	0	2	0	4	0
89	2678	CC[C@H](C)CC[C@H](C)CC	C10H22	32	-62.076	C -4.413819 -0.431387 -0.482838 H -4.516461 0.318874 -1.277067 H -4.808500 0.006743 0.440314 H -5.058435 -1.278843 -0.743130 C -2.955626 -0.881079 -0.333054 C -1.944034 0.253566 -0.067136 C -0.502565 -0.291721 -0.155709 H -0.358593 -1.028077 0.647694 C 0.599111 0.778664 -0.101019 H 0.626153 1.245991 0.893665 C 2.019020 0.279734 -0.447872 H 1.963125 -0.227453 -1.425130 C 2.538767 -0.746723 0.58022…	0	0	0	0	0	4	0	0	0	0	0	0	0	4	0	2	0	4	0
90	2684	CCCCC(C)(C)CCC	C10H22	32	-62.7928	C 3.360290 -2.014339 -0.135442 H 3.242603 -2.307814 -1.186036 H 2.837327 -2.760724 0.475366 H 4.427265 -2.072542 0.108809 C 2.805569 -0.606493 0.112587 C 1.310797 -0.503398 -0.229700 C 0.616865 0.863948 0.015184 C -0.849283 0.801082 -0.500063 H -0.823090 0.612755 -1.584137 C -1.795290 -0.221112 0.148174 H -1.408684 -1.239870 0.010615 C -3.217310 -0.153234 -0.427595 H -3.176547 -0.317158 -1.513961…	0	0	0	0	0	4	0	0	0	0	0	0	0	5	0	0	1	4	0
91	2693	CCC[C@H](C)[C@H](C)CCC	C10H22	32	-61.1479	C 3.632849 -1.748546 0.442575 H 3.032981 -2.646949 0.634160 H 3.912817 -1.325810 1.415503 H 4.554320 -2.064270 -0.060132 C 2.855179 -0.731572 -0.399960 C 1.554467 -0.270218 0.275312 C 0.695595 0.695997 -0.569674 C -0.753023 0.877511 -0.024686 H -1.216329 1.647157 -0.662712 C -1.598225 -0.403797 -0.197433 H -1.411880 -0.815329 -1.200767 C -3.112622 -0.206605 -0.032164 H -3.450739 0.584415 -0.71707…	0	0	0	0	0	4	0	0	0	0	0	0	0	4	0	2	0	4	0
92	2699	CCCC(CCC)CCC	C10H22	32	-60.4035	C -0.998924 3.824094 -0.096336 H -1.304256 3.867211 -1.149169 H 0.000000 4.272088 -0.024575 H -1.688570 4.454998 0.476204 C -0.998046 2.381607 0.421283 C -0.028314 1.471879 -0.346692 C 0.000000 0.000000 0.124175 C 1.288842 -0.711419 -0.346692 H 1.432771 -0.508204 -1.419355 C 2.561555 -0.326470 0.421283 H 2.724148 0.758160 0.367210 C 3.811225 -1.046954 -0.096336 H 4.001231 -0.804087 -1.149169 H -0…	0	0	0	0	0	3	0	0	0	0	0	0	0	6	0	1	0	3	0
93	2704	CCCC(CCC)C(C)C	C10H22	32	-60.7321	C -3.419869 -1.744782 0.199240 H -4.124071 -0.913428 0.070031 H -3.352318 -1.955144 1.273825 H -3.853824 -2.626791 -0.285793 C -2.045402 -1.403045 -0.385856 C -1.413323 -0.158933 0.256366 C -0.010507 0.197744 -0.289838 C 1.066364 -0.747002 0.293148 H 0.661232 -1.767384 0.333416 C 2.388199 -0.795537 -0.487306 H 2.179755 -1.080713 -1.528516 C 3.399242 -1.776505 0.116567 H 2.996283 -2.796653 0.14127…	0	0	0	0	0	4	0	0	0	0	0	0	0	4	0	2	0	4	0
94	2711	CCCC[C@@H](CC)C(C)C	C10H22	32	-60.8456	C 1.936825 -1.835135 -1.176333 H 1.812526 -1.451121 -2.196108 H 1.102971 -2.518331 -0.973846 H 2.857145 -2.431105 -1.153534 C 2.002822 -0.689146 -0.152956 C 0.757422 0.242361 -0.241000 C -0.525766 -0.412807 0.323036 C -1.833253 0.171613 -0.232462 H -1.846903 0.046290 -1.325574 C -3.089445 -0.476423 0.364745 H -3.056539 -1.561094 0.188005 C -4.392806 0.093740 -0.204222 H -4.448819 -0.052409 -1.290…	0	0	0	0	0	4	0	0	0	0	0	0	0	4	0	2	0	4	0
95	2721	CCCCC(C)(CC)CC	C10H22	32	-62.3476	C -3.471847 -0.506231 -0.434582 H -3.742238 0.484889 -0.053493 H -3.676973 -1.234442 0.357712 H -4.150451 -0.730941 -1.265665 C -2.015015 -0.563220 -0.912700 C -0.906851 -0.309438 0.149569 C 0.451100 -0.369437 -0.607014 C 1.730460 -0.098517 0.198920 H 1.797746 -0.787246 1.052000 C 3.001994 -0.240517 -0.650426 H 3.042430 -1.253729 -1.075116 C 4.287713 0.034794 0.135989 H 4.392361 -0.658191 0.98004…	0	0	0	0	0	4	0	0	0	0	0	0	0	5	0	0	1	6	0
96	2729	CCC[C@@H](C)C(CC)CC	C10H22	32	-60.0696	C -2.431375 2.230434 -0.449600 H -3.378796 1.694025 -0.574836 H -2.030081 2.429429 -1.451098 H -2.662527 3.196782 0.013491 C -1.425298 1.441703 0.398604 C -1.044957 0.061700 -0.189385 C 0.318065 -0.472242 0.347571 C 1.509223 0.288797 -0.275843 H 1.518043 1.329507 0.080003 C 2.888655 -0.333728 -0.013624 H 3.105581 -0.331366 1.062224 C 4.017324 0.394216 -0.752216 H 4.077261 1.446131 -0.446307 H -1.…	0	0	0	0	0	4	0	0	0	0	0	0	0	4	0	2	0	5	0
97	2738	CC[C@H](C)CC(CC)CC	C10H22	32	-60.8414	C -2.386528 -2.244646 0.104754 H -2.520397 -2.179079 1.191698 H -1.469219 -2.814914 -0.080288 H -3.221833 -2.829524 -0.297436 C -2.339084 -0.848422 -0.527500 C -1.188357 0.051100 -0.022105 C 0.169425 -0.408327 -0.602992 C 1.434704 0.070231 0.144147 C 2.678013 -0.113846 -0.751752 H 2.803928 -1.184870 -0.971161 C 3.984567 0.445473 -0.176607 H 4.294355 -0.080800 0.732740 H -3.299270 -0.352663 -0.336…	0	0	0	0	0	4	0	0	0	0	0	0	0	4	0	2	0	5	0
98	2747	CCC(CC)CCC(C)C	C10H22	32	-61.4897	C 2.810579 -2.142093 -0.287886 H 3.753107 -1.597963 -0.160187 H 2.628937 -2.239662 -1.365471 H 2.958947 -3.150379 0.115778 C 1.635663 -1.441435 0.405416 C 1.339092 -0.013400 -0.105932 C -0.072380 0.451075 0.320429 C -1.226702 -0.211386 -0.447698 C -2.631181 0.324647 -0.101801 C -3.678066 -0.246319 -1.070313 H -3.737338 -1.339356 -0.983558 H 1.820070 -1.395695 1.489244 H -3.431291 -0.008835 -2.112…	0	0	0	0	0	4	0	0	0	0	0	0	0	4	0	2	0	4	0
99	2755	CCC[C@H](CC)CC(C)C	C10H22	32	-61.4325	C 3.295666 -0.922513 -0.847595 H 3.326159 -0.472276 -1.847015 H 3.076652 -1.991465 -0.971143 H 4.297753 -0.838591 -0.410074 C 2.239694 -0.245776 0.040213 C 0.841723 -0.363693 -0.604579 C -0.275676 0.520221 -0.002728 C -1.672274 -0.011595 -0.397290 C -2.123440 -1.271927 0.354908 C -3.504537 -1.767938 -0.086951 H -3.510276 -2.027259 -1.152913 H 2.503633 0.819652 0.112621 H -4.271150 -0.998702 0.068…	0	0	0	0	0	4	0	0	0	0	0	0	0	4	0	2	0	4	0
100	2765	CCC[C@H](CC)[C@H](C)CC	C10H22	32	-60.1452	C -3.262133 -1.463927 -0.582447 H -3.878365 -0.581266 -0.796039 H -3.523720 -1.816183 0.421267 H -3.552644 -2.249250 -1.289847 C -1.768259 -1.140203 -0.710256 C -1.286446 0.038793 0.164129 C 0.165314 0.468813 -0.206998 C 1.236586 -0.531878 0.288765 C 2.558160 -0.487248 -0.493317 C 3.601270 -1.474553 0.041076 H 3.228788 -2.505768 0.001052 H -1.549804 -0.903320 -1.761005 H 3.855083 -1.256447 1.0858…	0	0	0	0	0	4	0	0	0	0	0	0	0	4	0	2	0	5	0
101	2776	CCCC(C)(CC)CCC	C10H22	32	-62.3177	C -3.636681 0.346614 -0.459200 H -4.037969 -0.647960 -0.690125 H -3.508141 0.878472 -1.410162 H -4.393721 0.884384 0.123177 C -2.310512 0.245996 0.304336 C -1.233635 -0.497515 -0.500267 C 0.150084 -0.720619 0.174913 C 0.780739 0.615746 0.652060 C 1.042074 1.689178 -0.415023 C 1.664405 2.959284 0.177121 H 2.624554 2.742176 0.661524 H -2.487419 -0.260532 1.261739 H 1.008235 3.407086 0.933810 H 0.10…	0	0	0	0	0	4	0	0	0	0	0	0	0	5	0	0	1	6	0
102	2783	CCC[C@@H](C)[C@@H](C)C(C)C	C10H22	32	-61.367	C -3.260141 -0.612650 -0.525359 H -3.402333 -0.089598 -1.475584 H -3.817247 -0.064507 0.246405 H -3.722563 -1.601699 -0.625037 C -1.774958 -0.747160 -0.140102 C -1.106183 0.644825 0.065071 C 0.352737 0.576450 0.614871 C 1.347749 -0.078461 -0.367388 C 2.728055 -0.394610 0.229039 C 3.643051 -1.134845 -0.752676 H 3.814346 -0.541057 -1.659185 H -1.267118 -1.249750 -0.977059 H 3.202238 -2.090278 -1.06…	0	0	0	0	0	5	0	0	0	0	0	0	0	2	0	3	0	5	0
103	2793	CC[C@H](C)C[C@@H](C)C(C)C	C10H22	32	-62.4127	C -2.710392 1.572341 0.032381 H -1.901421 2.308781 -0.023881 H -3.015827 1.489316 1.082342 H -3.563665 1.979038 -0.523396 C -2.296793 0.207912 -0.544505 C -1.011522 -0.393029 0.098607 C 0.241877 0.414656 -0.305145 C 1.617351 -0.172802 0.083608 C 2.730007 0.827019 -0.299789 C 4.128759 0.476165 0.221127 H 4.508854 -0.456873 -0.208947 H -2.058409 0.362819 -1.608058 H 4.127181 0.362512 1.312604 H 2.4…	0	0	0	0	0	5	0	0	0	0	0	0	0	2	0	3	0	5	0
104	2803	CC[C@H](C)[C@H](C)CC(C)C	C10H22	32	-62.3191	C 3.290368 1.446781 0.004939 H 2.940555 2.250995 0.663440 H 3.250382 1.820948 -1.026637 H 4.341924 1.249422 0.245418 C 2.434861 0.179894 0.163521 C 0.953086 0.506122 -0.123496 C -0.068303 -0.635695 0.076080 C -1.480949 -0.232689 -0.447735 C -2.197632 0.807269 0.441740 C -3.413875 1.470477 -0.217892 H -4.205421 0.748088 -0.445422 H 2.522923 -0.145015 1.210235 H -3.133865 1.962638 -1.157815 H -1.48…	0	0	0	0	0	5	0	0	0	0	0	0	0	2	0	3	0	5	0
105	2813	CC[C@H](C)[C@H](C)[C@H](C)CC	C10H22	32	-60.1909	C 3.127862 -1.427291 -0.583414 H 2.924650 -2.199214 0.169814 H 3.987069 -0.843726 -0.235139 H 3.430785 -1.936641 -1.505584 C 1.893129 -0.548379 -0.822933 C 1.349079 0.142263 0.447006 C -0.065952 0.769490 0.251862 C -1.201921 -0.268894 -0.019234 C -2.598077 0.370262 0.184075 C -3.763962 -0.425393 -0.417076 H -3.867325 -1.419992 0.030166 H 1.104326 -1.171585 -1.264100 H -3.631850 -0.560309 -1.49794…	0	0	0	0	0	5	0	0	0	0	0	0	0	2	0	3	0	6	0
106	2820	CC(C)CC[C@@H](C)C(C)C	C10H22	32	-63.1304	C -2.729350 1.520156 0.210135 H -1.873145 2.200161 0.277903 H -3.060418 1.295049 1.231063 H -3.543353 2.064685 -0.283101 C -2.391670 0.238420 -0.569843 C -1.164389 -0.538619 -0.011039 C 0.148958 0.245572 -0.226573 C 1.427617 -0.577017 -0.000930 C 2.732940 0.122253 -0.432233 C 3.013587 1.397659 0.377446 H 3.103399 1.167948 1.447745 H -2.115392 0.542789 -1.591200 H 2.219278 2.142760 0.261734 H 2.62…	0	0	0	0	0	5	0	0	0	0	0	0	0	2	0	3	0	4	0
107	2829	CC(C)CC(C)CC(C)C	C10H22	32	-64.2668	C -3.756550 -0.937112 -0.390997 H -3.692793 -1.925964 0.078899 H -3.704858 -1.081943 -1.478228 H -4.742941 -0.517923 -0.158890 C -2.629440 -0.011949 0.094436 C -1.257771 -0.657417 -0.192753 C 0.000000 0.088658 0.305149 C 1.257772 -0.657418 -0.192752 C 2.629441 -0.011950 0.094437 C 3.756551 -0.937112 -0.390999 H 3.704858 -1.081941 -1.478230 H -2.742781 0.097303 1.182567 H 3.692794 -1.925964 0.0788…	0	0	0	0	0	5	0	0	0	0	0	0	0	2	0	3	0	4	0
108	2835	CCCC[C@@H](C)C(C)(C)C	C10H22	32	-62.8112	C 2.197423 -0.527187 1.450778 H 1.419635 -1.152077 1.903295 H 2.241549 0.413418 2.012044 H 3.156448 -1.039481 1.596321 C 1.940469 -0.288071 -0.051239 C 0.600757 0.494476 -0.299510 C -0.632906 -0.166285 0.364002 C -1.973297 0.195754 -0.294180 C -3.180802 -0.453580 0.395161 C -4.516169 -0.106035 -0.270847 H -4.535189 -0.435866 -1.316991 H -4.693026 0.976688 -0.263435 H -3.205859 -0.142876 1.449427 …	0	0	0	0	0	5	0	0	0	0	0	0	0	3	0	1	1	5	0
109	2843	CCC[C@H](C)CC(C)(C)C	C10H22	32	-63.4922	C -2.622721 0.685593 -0.661819 H -2.066909 1.164538 -1.475675 H -2.913175 1.464704 0.053728 H -3.543020 0.271720 -1.092688 C -1.799798 -0.423957 0.020177 C -0.523200 0.137849 0.707859 C 0.475747 0.957560 -0.154818 C 1.943811 0.623626 0.192770 C 2.426199 -0.758308 -0.268123 C 3.884648 -1.038154 0.110875 H 4.023880 -1.009402 1.198697 H 4.558867 -0.291730 -0.327152 H 2.311377 -0.832289 -1.359023 H 2…	0	0	0	0	0	5	0	0	0	0	0	0	0	3	0	1	1	4	1
110	2851	CC[C@@H](C)CCC(C)(C)C	C10H22	32	-64.51	C 2.445302 -1.520720 -0.518438 H 2.251439 -1.609097 -1.594930 H 1.780346 -2.219665 0.000810 H 3.474837 -1.853663 -0.337724 C 2.250776 -0.069712 -0.035914 C 0.829390 0.450773 -0.385395 C -0.358498 -0.279539 0.260682 C -1.746273 0.183147 -0.236285 C -2.840872 -0.759581 0.307357 C -4.241582 -0.536752 -0.275253 H -4.230492 -0.609728 -1.370151 H -4.647690 0.446018 -0.012388 H -2.881013 -0.665820 1.403…	0	0	0	0	0	5	0	0	0	0	0	0	0	3	0	1	1	4	0
111	2859	CC(C)CCCC(C)(C)C	C10H22	32	-65.3646	C 3.458284 -0.901091 -0.640523 H 3.347969 -0.945918 -1.731233 H 3.405431 -1.927755 -0.257156 H 4.461159 -0.513916 -0.421756 C 2.369693 -0.012190 -0.006029 C 0.988176 -0.624124 -0.361182 C -0.261307 0.091643 0.174918 C -1.559239 -0.609565 -0.254427 C -2.856006 -0.012666 0.328246 C -4.058931 -0.905860 -0.011190 H -3.915205 -1.928327 0.358330 H -4.210342 -0.963096 -1.097251 H -4.982993 -0.515293 0.4…	0	0	0	0	0	5	0	0	0	0	0	0	0	3	0	1	1	3	0
112	2866	CCCCC(C)(C)C(C)C	C10H22	32	-62.7705	C 2.841618 0.814652 -0.945730 H 2.959349 0.113679 -1.777743 H 3.598105 0.571063 -0.190397 H 3.077298 1.815265 -1.327200 C 1.418181 0.799474 -0.356688 C 0.936235 -0.620535 0.106744 C -0.512163 -0.568511 0.676226 C -1.616018 -0.005635 -0.231711 C -3.006885 -0.084519 0.414431 C -4.119371 0.479654 -0.475168 H -4.181090 -0.064375 -1.425872 H -3.941376 1.536206 -0.711055 H -5.098133 0.408235 0.013046 H…	0	0	0	0	0	5	0	0	0	0	0	0	0	3	0	1	1	6	0
113	2874	CCC[C@@H](C)C(C)(C)CC	C10H22	32	-61.7977	C -2.738712 -1.172431 -1.029790 H -2.004668 -1.983601 -1.090227 H -2.735933 -0.650899 -1.993162 H -3.725864 -1.634584 -0.912768 C -2.457893 -0.219767 0.140012 C -1.105720 0.550994 0.117374 C 0.116415 -0.436384 0.065669 C 1.490290 0.276004 0.145271 C 2.655830 -0.531571 -0.447286 C 3.999646 0.197249 -0.338945 H 4.260629 0.394232 0.708272 H 3.970581 1.163189 -0.858427 H 4.811961 -0.392805 -0.778783 …	0	0	0	0	0	5	0	0	0	0	0	0	0	3	0	1	1	7	0
114	2883	CC[C@@H](C)CC(C)(C)CC	C10H22	32	-61.6892	C -3.752017 -0.283654 -0.306644 H -4.056669 0.318064 0.556589 H -3.775860 -1.336698 -0.005178 H -4.515978 -0.150545 -1.081403 C -2.377156 0.133204 -0.845066 C -1.164715 -0.001925 0.119124 C 0.074080 0.540720 -0.652391 C 1.466325 0.427772 0.030083 C 2.275590 -0.759066 -0.538907 C 3.551985 -1.103704 0.237250 H 3.326920 -1.329158 1.287524 H 4.278599 -0.283950 0.223363 H 4.044792 -1.984138 -0.191184 …	0	0	0	0	0	5	0	0	0	0	0	0	0	3	0	1	1	6	1
115	2892	CCCC(C)(C)CC(C)C	C10H22	32	-62.0012	C -3.280397 -1.263141 -0.287335 H -2.915225 -2.182977 0.184777 H -3.353746 -1.450502 -1.366786 H -4.294244 -1.072461 0.085341 C -2.345244 -0.076928 0.000621 C -0.916447 -0.356400 -0.540669 C 0.300285 0.064888 0.335929 C 1.570055 -0.202351 -0.521061 C 2.938928 0.053992 0.127409 C 4.097103 -0.230690 -0.836665 H 4.036889 0.405296 -1.728564 H 4.084523 -1.274232 -1.175036 H 5.067364 -0.046517 -0.36114…	0	0	0	0	0	5	0	0	0	0	0	0	0	3	0	1	1	5	1
116	2900	CCCC(C)(C)[C@H](C)CC	C10H22	32	-61.7565	C 3.271766 -1.082545 -0.715431 H 2.912862 -1.433771 -1.690954 H 3.314992 -1.949961 -0.047514 H 4.298881 -0.723819 -0.849890 C 2.371449 0.032522 -0.166289 C 0.893929 -0.390102 0.031628 C -0.103702 0.824104 0.082513 C -1.557642 0.354580 0.381011 C -2.191455 -0.657679 -0.585576 C -3.633260 -1.005689 -0.196090 H -4.270235 -0.112467 -0.194322 H -3.678634 -1.443937 0.808727 H -4.073335 -1.727294 -0.894…	0	0	0	0	0	5	0	0	0	0	0	0	0	3	0	1	1	7	0
117	2909	CCC(C)(C)CCC(C)C	C10H22	32	-63.9246	C -2.861721 1.639994 -0.637534 H -3.091949 1.208578 -1.618066 H -2.002841 2.308640 -0.760166 H -3.717185 2.260390 -0.346095 C -2.608626 0.558935 0.421589 C -1.447233 -0.440977 0.157790 C -0.108225 0.341025 0.058179 C 1.176387 -0.495638 -0.060465 C 2.451809 0.329628 -0.333895 C 2.789608 1.295551 0.812368 H 2.947980 0.746556 1.750399 H 1.993396 2.027461 0.984605 H 3.708880 1.853034 0.596305 H 1.064…	0	0	0	0	0	5	0	0	0	0	0	0	0	3	0	1	1	5	0
118	2917	CCCC(C(C)C)C(C)C	C10H22	32	-60.7821	C 0.393597 -2.442651 -0.935294 H 0.142913 -2.162219 -1.965709 H -0.536686 -2.735630 -0.434069 H 1.032626 -3.332905 -0.978252 C 1.112678 -1.295669 -0.204788 C 0.293587 0.028350 -0.258581 C -1.088633 -0.099139 0.449014 C -2.294397 0.206466 -0.452976 C -3.636373 0.089570 0.276465 H -2.282385 -0.480970 -1.310522 H -3.693455 0.792001 1.117459 H 2.041013 -1.117866 -0.762634 H -2.193352 1.215369 -0.8750…	0	0	0	0	0	5	0	0	0	0	0	0	0	2	0	3	0	5	0
119	2924	CCCC(CC)(CC)CC	C10H22	32	-61.3524	C 2.938591 -0.000026 -0.649254 H 3.201517 -0.884220 -0.057965 H 3.201546 0.884164 -0.057972 H 3.581544 -0.000040 -1.537157 C 1.462090 -0.000002 -1.066566 C 0.401109 0.000002 0.071455 C -0.990390 0.000010 -0.623963 C -2.237436 0.000002 0.273174 C -3.536748 0.000012 -0.541486 H -2.229897 0.877448 0.932779 H -3.600332 -0.884397 -1.187582 H 1.280005 -0.871689 -1.708841 H -2.229899 -0.877457 0.932761 …	0	0	0	0	0	4	0	0	0	0	0	0	0	5	0	0	1	8	0
120	2930	CCC(CC)C(CC)CC	C10H22	32	-59.1516	C 2.799205 -1.153504 -1.082284 H 2.852562 -1.945651 -0.325066 H 3.499474 -0.365059 -0.783633 H 3.163442 -1.572581 -2.027482 C 1.364921 -0.629519 -1.229654 C 0.780037 -0.016945 0.065525 C -0.780037 0.016945 0.065525 C -1.394649 -1.372965 0.354433 C -1.260079 -1.843788 1.807962 H -0.945267 -2.119228 -0.315785 H -1.749795 -1.142721 2.495292 H 0.730731 -1.460779 -1.563607 H -2.461777 -1.352340 0.0992…	0	0	0	0	0	4	0	0	0	0	0	0	0	4	0	2	0	6	0
121	2934	CCC[C@H](CC)C(C)(C)C	C10H22	32	-60.955	C -1.841322 -0.753052 1.434510 H -2.250203 0.193995 1.803691 H -1.031940 -1.054191 2.109736 H -2.633444 -1.507407 1.517150 C -1.361359 -0.636306 -0.026652 C -0.194142 0.406239 -0.177346 C 1.145508 -0.049523 0.475231 C 2.223340 -0.502979 -0.521354 C 3.523574 -0.942213 0.159406 H 2.434623 0.320796 -1.217913 H 3.351899 -1.791182 0.832987 H 1.836939 -1.326044 -1.136498 H 1.561520 0.773940 1.071069 H …	0	0	0	0	0	5	0	0	0	0	0	0	0	3	0	1	1	6	0
122	2942	CCC[C@](C)(CC)C(C)C	C10H22	32	-61.3133	C 2.678341 -0.427282 -0.797942 H 3.279007 -0.306456 0.111208 H 2.755085 0.497852 -1.376745 H 3.147923 -1.220636 -1.391508 C 1.221159 -0.811493 -0.473175 H 0.718256 -0.967954 -1.438599 C 0.405457 0.315945 0.263422 C -1.027579 -0.180491 0.612634 H -1.547736 0.628744 1.142629 H -0.951910 -0.994809 1.345393 C -1.919656 -0.646249 -0.548257 H -1.453787 -1.491760 -1.070389 H -2.016365 0.154151 -1.293601…	0	0	0	0	0	5	0	0	0	0	0	0	0	3	0	1	1	8	0
123	2951	CC[C@H](C)[C@H](CC)C(C)C	C10H22	32	-59.0266	C -1.910291 -1.256064 1.220086 H -2.754343 -0.560902 1.296020 H -1.258706 -1.082533 2.080839 H -2.317765 -2.270132 1.312844 C -1.172836 -1.108029 -0.124575 H -0.417073 -1.904137 -0.165447 C -0.428991 0.253258 -0.331871 H -0.354971 0.385715 -1.423066 C 1.050176 0.270530 0.166280 H 1.408156 1.299618 0.015009 C 1.953435 -0.623592 -0.713743 H 1.729829 -0.412183 -1.768795 H 1.701381 -1.681510 -0.55590…	0	0	0	0	0	5	0	0	0	0	0	0	0	2	0	3	0	6	0
124	2961	CC[C@@H](CC(C)C)C(C)C	C10H22	32	-62.4173	C 3.082619 -0.117816 0.446262 H 3.034552 -0.412505 1.503203 H 3.238537 0.964626 0.408483 H 3.972137 -0.590719 0.013666 C 1.816428 -0.561377 -0.308196 H 1.887597 -0.173923 -1.335987 C 0.512843 0.007575 0.329244 H 0.433250 -0.456678 1.325157 C -0.737463 -0.407591 -0.484582 H -0.778209 -1.502928 -0.539477 H -0.617023 -0.062709 -1.522180 C -2.111912 0.070983 0.030813 H -2.121801 1.170044 0.044891 C -…	0	0	0	0	0	5	0	0	0	0	0	0	0	2	0	3	0	5	0
125	2970	CC[C@H](C)C(C)(CC)CC	C10H22	32	-59.7566	C 2.420035 -1.859329 -0.382384 H 2.615863 -2.092809 0.669945 H 3.178783 -1.141802 -0.712212 H 2.576438 -2.781282 -0.954564 C 0.989995 -1.342828 -0.602625 H 0.851395 -1.168928 -1.677837 H 0.296357 -2.149696 -0.334539 C 0.574877 -0.059191 0.173339 C -0.929777 0.296787 -0.132689 H -1.170141 1.148168 0.521493 C -1.929327 -0.828560 0.237316 H -1.609235 -1.329003 1.157887 H -1.922649 -1.599164 -0.54547…	0	0	0	0	0	5	0	0	0	0	0	0	0	3	0	1	1	9	0
126	2978	CCC(C)(CC)CC(C)C	C10H22	32	-61.3403	C 3.210693 -0.638390 -0.476212 H 3.328625 -1.482387 0.212230 H 3.554167 0.263730 0.042123 H 3.891701 -0.808864 -1.318138 C 1.769099 -0.500979 -0.983487 H 1.728190 0.331565 -1.698838 H 1.514870 -1.399605 -1.563287 C 0.655720 -0.297643 0.084639 C -0.673009 -0.089476 -0.701656 H -0.771084 -0.914676 -1.422336 H -0.554659 0.813082 -1.315031 C -1.998271 0.020827 0.102405 H -1.765110 0.305383 1.137838 C…	0	0	0	0	0	5	0	0	0	0	0	0	0	3	0	1	1	7	1
127	2985	CCC(CC)C(C)(C)CC	C10H22	32	-59.6179	C 2.357121 -1.428609 -1.027509 H 2.889589 -0.553043 -1.416854 H 1.714434 -1.806031 -1.832294 H 3.102910 -2.201986 -0.807224 C 1.531966 -1.078035 0.217524 H 1.058173 -1.994593 0.583714 H 2.212426 -0.768114 1.021515 C 0.466960 0.037396 -0.021687 H 0.473001 0.256367 -1.099986 C -1.001330 -0.419930 0.305752 C -2.039740 0.704430 0.012951 H -1.919851 1.509923 0.748364 H -3.035693 0.281935 0.207167 C -2…	0	0	0	0	0	5	0	0	0	0	0	0	0	3	0	1	1	8	0
128	2992	CCC(CC)[C@H](C)C(C)C	C10H22	32	-59.9916	C 2.391116 -2.002672 -0.584292 H 3.291940 -1.378604 -0.568433 H 2.058365 -2.074429 -1.627301 H 2.684844 -3.007719 -0.259794 C 1.279635 -1.439163 0.310586 H 0.428351 -2.131116 0.273620 H 1.620190 -1.437522 1.355169 C 0.811488 -0.017451 -0.083322 H 0.765756 0.007571 -1.180888 C -0.616785 0.318015 0.454242 H -0.762239 1.401676 0.327944 C -1.750723 -0.360766 -0.372064 H -1.542922 -1.441055 -0.413330 …	0	0	0	0	0	5	0	0	0	0	0	0	0	2	0	3	0	6	0
129	3000	CCC(CC)CC(C)(C)C	C10H22	32	-62.869	C 1.575511 2.499238 0.270682 H 1.609869 2.396297 1.362380 H 0.575526 2.861709 0.006105 H 2.292374 3.278910 -0.011918 C 1.908746 1.170375 -0.416928 H 1.928028 1.312728 -1.507722 H 2.929141 0.883170 -0.133217 C 0.938511 0.012494 -0.088048 H 0.792679 0.010007 1.002992 C -0.436381 0.219354 -0.781681 H -0.446659 -0.372967 -1.708828 H -0.528657 1.265228 -1.104396 C -1.723737 -0.113958 0.024933 C -2.930…	0	0	0	0	0	5	0	0	0	0	0	0	0	3	0	1	1	5	1
130	3006	CC(C)[C@H](C)[C@H](C)C(C)C	C10H22	32	-61.2577	C -2.397286 -1.075614 0.984637 H -2.622737 -0.377905 1.800091 H -1.634264 -1.774400 1.345469 H -3.307799 -1.655223 0.790810 C -1.951695 -0.333878 -0.286566 H -1.776411 -1.090084 -1.061440 C -0.618866 0.460736 -0.120726 H -0.460918 0.964620 -1.086856 C 0.618866 -0.460740 0.120722 H 0.460916 -0.964629 1.086848 C 1.951693 0.333874 0.286572 H 1.776407 1.090071 1.061455 C 3.093320 -0.551357 0.817185 H…	0	0	0	0	0	6	0	0	0	0	0	0	0	0	0	4	0	6	0
131	3011	CCCC(C)(C)C(C)(C)C	C10H22	32	-61.6968	C 2.699854 0.483787 -0.253060 H 2.767504 1.352099 0.411534 H 2.738239 0.845873 -1.285450 H 3.599452 -0.121308 -0.087685 C 1.439502 -0.371233 0.017692 C 0.111756 0.514129 -0.034799 C -1.144340 -0.409095 -0.089602 H -1.039571 -1.212422 0.652021 H -1.171063 -0.905877 -1.068335 C -2.514949 0.250885 0.139632 H -2.654066 1.097863 -0.544863 H -2.569793 0.664555 1.154055 C -3.668407 -0.740612 -0.056113 H…	0	0	0	0	0	6	0	0	0	0	0	0	0	2	0	0	2	8	0
132	3017	CCC(C)(C)CC(C)(C)C	C10H22	32	-61.0907	C 1.967517 -0.535053 1.279496 H 1.570382 -1.555206 1.270890 H 1.567993 -0.023119 2.162860 H 3.055081 -0.611072 1.404913 C 1.636067 0.229751 -0.016148 C 0.117901 0.567217 -0.178551 H 0.017117 1.005764 -1.182935 H -0.093030 1.389704 0.518049 C -1.047899 -0.458811 -0.005932 C -2.329358 0.175616 -0.630479 H -3.144402 -0.555439 -0.530834 H -2.161025 0.293778 -1.710648 C -2.808279 1.516731 -0.059012 H …	0	0	0	0	0	6	0	0	0	0	0	0	0	2	0	0	2	6	2
133	3023	CC(C)(C)CCC(C)(C)C	C10H22	32	-66.9968	C -2.963086 1.215153 -0.000056 H -2.801776 1.841799 -0.886158 H -2.801745 1.841903 0.885967 H -4.014207 0.901051 -0.000019 C -2.019350 -0.004577 -0.000001 C -0.558612 0.527730 -0.000044 H -0.443639 1.178459 0.877702 H -0.443668 1.178403 -0.877835 C 0.558612 -0.527730 -0.000035 H 0.443669 -1.178415 -0.877817 H 0.443639 -1.178447 0.877720 C 2.019350 0.004577 0.000000 C 2.963086 -1.215153 -0.000070 …	0	0	0	0	0	6	0	0	0	0	0	0	0	2	0	0	2	4	0
134	3026	CCC(C)(C)C(C)(C)CC	C10H22	32	-59.6631	C -0.191218 2.979608 -1.126149 H 0.802786 3.376819 -0.891628 H -0.905809 3.442515 -0.437800 H -0.444908 3.320772 -2.136636 C -0.239092 1.444861 -1.068389 H -1.262703 1.135220 -1.314907 H 0.395863 1.057392 -1.873791 C 0.191218 0.778348 0.275537 C -0.191218 -0.778348 0.275537 C 0.239092 -1.444861 -1.068389 H 1.262703 -1.135220 -1.314907 H -0.395863 -1.057392 -1.873791 C 0.191218 -2.979608 -1.126149…	0	0	0	0	0	6	0	0	0	0	0	0	0	2	0	0	2	10	0
135	3030	CC[C@H](C)[C@H](C)C(C)(C)C	C10H22	32	-61.0915	C 2.837822 0.334968 -0.378236 H 3.039889 1.301060 0.101795 H 2.828364 0.492392 -1.461706 H 3.680533 -0.329561 -0.151962 C 1.517673 -0.283025 0.133778 C 0.352037 0.766522 0.004004 H 0.616951 1.549671 0.731033 C -1.060059 0.244866 0.440577 H -0.910033 -0.555781 1.176894 C -1.909585 -0.358644 -0.704740 H -1.276251 -0.960004 -1.365467 H -2.311646 0.451426 -1.328154 C -3.067362 -1.240074 -0.217615 H -…	0	0	0	0	0	6	0	0	0	0	0	0	0	1	0	2	1	7	1
136	3038	CC(C)C[C@H](C)C(C)(C)C	C10H22	32	-63.8851	C -1.595369 -1.794631 0.053742 H -0.802942 -2.186870 0.699566 H -1.397574 -2.143623 -0.967616 H -2.537509 -2.249555 0.383044 C -1.694085 -0.254296 0.104104 C -0.353460 0.379932 -0.415594 H -0.153104 -0.116063 -1.377215 C 0.855128 0.117819 0.518257 H 0.762863 -0.860417 1.007638 H 0.834261 0.860243 1.328724 C 2.244563 0.166523 -0.156976 H 2.302860 1.075310 -0.773898 C 3.351701 0.258168 0.904533 H 3…	0	0	0	0	0	6	0	0	0	0	0	0	0	1	0	2	1	6	0
137	3045	CC(C)[C@H](C)CC(C)(C)C	C10H22	32	-63.7414	C 2.267235 1.344439 0.247749 H 1.587738 1.860981 0.934964 H 2.261683 1.888161 -0.705048 H 3.278057 1.421246 0.667452 C 1.873965 -0.132153 0.051708 C 0.473188 -0.274694 -0.608945 H 0.276943 -1.352342 -0.700871 H 0.542206 0.100824 -1.640007 C -0.730200 0.406522 0.102084 H -0.434248 0.630171 1.137039 C -1.946230 -0.558722 0.219943 H -1.551281 -1.482604 0.669840 C -2.563638 -0.940664 -1.135565 H -1.8…	0	0	0	0	0	6	0	0	0	0	0	0	0	1	0	2	1	5	1
138	3052	CC[C@H](C)C(C)(C)C(C)C	C10H22	32	-60.2048	C -3.004423 -0.231923 0.244308 H -3.053370 -0.974821 1.045800 H -3.253075 -0.734408 -0.697678 H -3.796716 0.501920 0.434517 C -1.641270 0.485442 0.180384 H -1.515627 0.975776 1.154793 C -0.405754 -0.477558 0.010703 C 0.940069 0.347802 0.040391 H 0.948376 0.949884 -0.879621 C 2.216963 -0.532270 -0.008428 H 2.045389 -1.426632 -0.616899 H 2.450641 -0.894093 1.002138 C 3.442993 0.195288 -0.576959 H 3…	0	0	0	0	0	6	0	0	0	0	0	0	0	1	0	2	1	9	0
139	3060	CC(C)CC(C)(C)C(C)C	C10H22	32	-61.1126	C -2.324738 -1.436898 -0.616580 H -2.179797 -2.206540 0.147794 H -1.709051 -1.703846 -1.483463 H -3.372054 -1.489283 -0.936766 C -2.004244 -0.020013 -0.103900 H -2.725137 0.199300 0.699332 C -0.587334 0.123684 0.568183 C 0.534748 -0.314698 -0.417235 H 0.389992 0.191285 -1.381688 H 0.388185 -1.383216 -0.618704 C 2.012317 -0.103805 0.018176 H 2.062088 -0.077898 1.115391 C 2.883764 -1.282416 -0.4473…	0	0	0	0	0	6	0	0	0	0	0	0	0	1	0	2	1	7	1
140	3067	CCC(C)(C)[C@@H](C)C(C)C	C10H22	32	-60.6775	C -2.707283 -1.360610 0.133639 H -2.876593 -1.297339 1.214066 H -2.000921 -2.179127 -0.043299 H -3.659339 -1.646891 -0.328348 C -2.217251 -0.028272 -0.449563 H -2.133660 -0.124661 -1.539474 H -2.997562 0.727616 -0.282330 C -0.886349 0.553288 0.114578 C 0.301223 -0.461989 -0.078627 H 0.053305 -1.305448 0.581682 C 1.697987 0.051332 0.416488 H 1.525260 0.788751 1.209762 C 2.498325 -1.099194 1.053336…	0	0	0	0	0	6	0	0	0	0	0	0	0	1	0	2	1	8	1
141	3075	CC(C)C(C(C)C)C(C)C	C10H22	32	-58.3656	C -2.473485 -0.409159 -1.090921 H -2.505853 -1.460956 -0.783297 H -2.155551 -0.378409 -2.140304 H -3.501199 -0.029033 -1.043433 C -1.547618 0.441214 -0.202326 H -1.659759 1.468733 -0.567226 C -0.041170 0.067848 -0.383434 H 0.116647 0.077758 -1.474168 C 0.255514 -1.402187 0.094678 H -0.715272 -1.911380 0.139398 C 0.854408 -1.541202 1.507348 H 0.259513 -1.016437 2.261792 H 0.885318 -2.600068 1.7922…	0	0	0	0	0	6	0	0	0	0	0	0	0	0	0	4	0	6	0
142	3079	CCC(CC)(CC)C(C)C	C10H22	32	-57.4294	C -2.458908 0.134157 -0.793120 H -2.504917 -0.819035 -1.332392 H -2.209905 0.916026 -1.517322 H -3.470094 0.342609 -0.423382 C -1.472591 0.079685 0.388894 H -1.544383 1.046951 0.905462 C 0.044899 -0.064770 -0.023657 C 0.892247 -0.021103 1.292585 H 0.859694 -1.015610 1.756194 H 0.390351 0.647726 2.005476 C 2.363001 0.422798 1.215538 H 2.463997 1.466268 0.900013 H 2.820902 0.340980 2.208767 H 2.959…	0	0	0	0	0	5	0	0	0	0	0	0	0	3	0	1	1	10	0
143	3084	CCC(C)(C(C)C)C(C)C	C10H22	32	-58.5459	C 1.393027 -1.004821 -1.530945 H 1.631947 -0.049581 -2.007710 H 0.528934 -1.428281 -2.050592 H 2.239563 -1.677966 -1.714368 C 1.170679 -0.868966 -0.010235 H 0.931897 -1.879946 0.349325 C -0.040802 0.037907 0.453774 C -1.303927 -0.223839 -0.447795 H -1.004358 -0.008644 -1.480946 C -2.502717 0.698864 -0.150676 H -2.269754 1.757218 -0.300677 H -3.333056 0.451608 -0.823024 H -2.873070 0.578294 0.8740…	0	0	0	0	0	6	0	0	0	0	0	0	0	1	0	2	1	10	0
144	3090	CCC(C)(CC)C(C)(C)C	C10H22	32	-58.4733	C -2.066753 0.729309 -0.796582 H -1.969043 0.412167 -1.840946 H -1.804877 1.790824 -0.742082 H -3.127074 0.642663 -0.529796 C -1.214809 -0.136122 0.159975 C 0.314234 -0.194634 -0.313096 C 1.208202 -0.720560 0.849438 H 0.765560 -1.645880 1.240574 H 1.181464 -0.006323 1.679457 C 2.681476 -1.006366 0.520350 H 3.210714 -0.113645 0.169060 H 3.201341 -1.356762 1.419717 H 2.794409 -1.783140 -0.243097 C …	0	0	0	0	0	6	0	0	0	0	0	0	0	2	0	0	2	10	0
145	3095	CC[C@@H](C(C)C)C(C)(C)C	C10H22	32	-58.972	C -1.725975 -0.446028 1.424092 H -1.371469 0.319457 2.124257 H -1.247034 -1.394809 1.689088 H -2.803613 -0.568120 1.590389 C -1.452663 -0.048431 -0.040669 C 0.079846 0.213555 -0.322593 H 0.129905 0.356706 -1.413848 C 0.982881 -1.033452 0.000446 H 0.323784 -1.908352 0.037434 C 1.699370 -0.998356 1.363740 H 1.005793 -0.824452 2.192564 H 2.193780 -1.960389 1.546009 H 2.473183 -0.224672 1.410010 C -2…	0	0	0	0	0	6	0	0	0	0	0	0	0	1	0	2	1	7	1
146	3102	CC(C(C)(C)C)C(C)(C)C	C10H22	32	-57.4258	C 2.463352 0.353877 -1.015885 H 2.569015 1.443131 -1.013974 H 2.236323 0.042069 -2.042903 H 3.441054 -0.066303 -0.750608 C 1.378735 -0.150626 -0.029500 C -0.005149 0.504353 -0.456802 H -0.015220 0.435643 -1.555642 C -1.381145 -0.159090 -0.023584 C -2.543667 0.794404 -0.404809 H -2.495978 1.085244 -1.461887 H -3.503046 0.288125 -0.245912 H -2.555280 1.707339 0.197540 C 1.817923 0.241407 1.400379 H…	0	0	0	0	0	7	0	0	0	0	0	0	0	0	0	1	2	8	2
147	3106	CC(C)C(C)(C)C(C)(C)C	C10H22	32	-58.0649	C -1.308791 1.721236 -0.196190 H -0.632131 2.158295 -0.936707 H -1.072159 2.151297 0.782916 H -2.323328 2.048865 -0.454311 C -1.256904 0.176526 -0.188049 C 0.154917 -0.407656 0.295611 C 1.367179 0.287560 -0.459186 H 1.012584 0.545312 -1.465875 C 2.596650 -0.624201 -0.658117 H 2.385077 -1.500986 -1.275746 H 3.395128 -0.060119 -1.154652 H 2.999811 -0.976009 0.300092 C -1.597560 -0.296927 -1.621752 …	0	0	0	0	0	7	0	0	0	0	0	0	0	0	0	1	2	10	1
148	3111	CCCCCCCCCCC	C11H24	35	-66.7453	C -6.411946 -0.378560 -0.000004 H -6.458418 -1.025800 -0.884604 H -7.310020 0.249833 -0.000006 H -6.458419 -1.025795 0.884600 C -5.134987 0.468089 -0.000005 H -5.134462 1.129751 -0.878013 H -5.134463 1.129756 0.877998 C -3.851091 -0.371688 -0.000002 H -3.852241 -1.034408 -0.878456 H -3.852242 -1.034403 0.878455 C -2.567359 0.468139 -0.000004 H -2.567345 1.130710 0.878430 H -2.567343 1.130705 -0.8…	0	0	0	0	0	2	0	0	0	0	0	0	0	9	0	0	0	0	0
149	3112	CCCCCCCCC(C)C	C11H24	35	-67.7013	C 5.274681 -0.870235 -0.099711 H 5.393486 -1.093911 0.968744 H 6.218525 -0.439152 -0.454492 H 5.122062 -1.821765 -0.623122 C 4.099503 0.091738 -0.330941 H 4.025935 0.276871 -1.414221 C 2.774895 -0.555087 0.121375 H 2.812122 -0.720015 1.209566 H 2.703408 -1.554665 -0.332414 C 1.504511 0.231777 -0.230020 H 1.494498 0.440032 -1.310638 H 1.517102 1.210558 0.268498 C 0.213707 -0.504417 0.153972 H 0.22…	0	0	0	0	0	3	0	0	0	0	0	0	0	7	0	1	0	1	0
150	3113	CCCCCCC[C@H](C)CC	C11H24	35	-66.901	C -5.462343 -0.460189 -0.417095 H -5.840504 0.489156 -0.022504 H -6.207907 -1.229590 -0.185500 H -5.409518 -0.368543 -1.509379 C -4.096160 -0.829577 0.172832 H -3.824339 -1.835831 -0.175543 C -2.945460 0.135750 -0.182242 H -2.909028 0.215160 -1.281259 C -1.598265 -0.453717 0.285780 H -1.532805 -1.493481 -0.067297 H -1.594330 -0.508273 1.385608 C -0.346444 0.298087 -0.188532 H -0.343811 1.320778 0…	0	0	0	0	0	3	0	0	0	0	0	0	0	7	0	1	0	2	0
151	3114	CCCCCC[C@@H](C)CCC	C11H24	35	-66.8219	C 5.486993 -0.954490 -0.080723 H 5.643001 -1.018079 1.003377 H 6.426745 -0.616653 -0.532582 H 5.287904 -1.970042 -0.444844 C 4.330364 -0.007184 -0.418747 H 4.218179 0.056887 -1.510817 C 2.997812 -0.453172 0.199769 H 2.809211 -1.494609 -0.100405 C 1.767715 0.396020 -0.184357 H 1.718562 0.427811 -1.285180 C 0.477582 -0.286799 0.317280 H 0.483316 -0.298001 1.418368 H 0.499387 -1.341468 0.005580 C -0…	0	0	0	0	0	3	0	0	0	0	0	0	0	7	0	1	0	2	0
152	3115	CCCCC[C@H](C)CCCC	C11H24	35	-66.8406	C -5.691194 -0.387593 -0.368314 H -5.948788 0.624150 -0.031229 H -6.497310 -1.059147 -0.051112 H -5.679418 -0.376424 -1.465291 C -4.337416 -0.831326 0.195382 H -4.125209 -1.860216 -0.128619 C -3.177346 0.081101 -0.225918 H -3.118633 0.105683 -1.324759 C -1.823231 -0.363952 0.344262 H -1.665560 -1.419751 0.078790 C -0.600295 0.446510 -0.135189 H -0.603238 0.428714 -1.237384 C 0.701895 -0.235366 0.…	0	0	0	0	0	3	0	0	0	0	0	0	0	7	0	1	0	2	0
153	3116	CCCCCCCC(C)(C)C	C11H24	35	-69.5016	C 4.256463 1.131623 -0.000011 H 4.155576 1.770805 -0.886057 H 5.272709 0.718395 -0.000001 H 4.155568 1.770832 0.886014 C 3.200533 0.007991 0.000001 C 1.797520 0.671981 -0.000010 H 1.732696 1.332784 0.877712 C 0.575281 -0.258201 -0.000004 H 0.602398 -0.917144 0.878549 C -0.752810 0.512560 -0.000005 H -0.789008 1.174225 0.878326 C -1.988708 -0.396444 -0.000002 H -1.952753 -1.058021 0.878458 H -1.95…	0	0	0	0	0	4	0	0	0	0	0	0	0	6	0	0	1	2	0
154	3117	CCCCCC[C@H](C)C(C)C	C11H24	35	-67.1234	C -3.607740 -1.310032 0.776907 H -2.779972 -1.924870 1.146802 H -4.428526 -1.987627 0.513093 H -3.957176 -0.683613 1.606432 C -3.200485 -0.461636 -0.439466 C -1.961368 0.446641 -0.190985 H -1.823769 1.024874 -1.118962 C -0.677318 -0.388278 0.008118 H -0.660401 -1.190908 -0.744303 C 0.634028 0.403949 -0.101446 H 0.654631 0.939134 -1.062799 C 1.883534 -0.480258 0.010630 H 1.853575 -1.252392 -0.7726…	0	0	0	0	0	4	0	0	0	0	0	0	0	5	0	2	0	3	0
155	3118	CCCCC[C@@H](C)CC(C)C	C11H24	35	-68.1058	C -4.487825 -1.057318 -0.466278 H -4.404712 -1.264888 -1.539927 H -5.504798 -0.696056 -0.271782 H -4.366262 -2.009667 0.066619 C -3.435916 -0.034037 -0.010020 C -2.020559 -0.544942 -0.351057 H -1.863872 -1.493910 0.184850 C -0.831453 0.390826 -0.042794 H -0.839170 0.615125 1.034587 C 0.493489 -0.342618 -0.344410 H 0.457870 -1.333840 0.131175 C 1.767321 0.373798 0.126110 H 1.678174 0.604537 1.1984…	0	0	0	0	0	4	0	0	0	0	0	0	0	5	0	2	0	3	0
156	3119	CCCC[C@H](C)CCC(C)C	C11H24	35	-68.0034	C -3.837182 -1.070587 0.989110 H -3.042742 -1.715113 1.380143 H -4.746332 -1.678457 0.908650 H -4.028086 -0.285922 1.733573 C -3.466328 -0.454897 -0.368883 C -2.200757 0.423613 -0.293174 H -2.047973 0.896414 -1.275029 C -0.917067 -0.326825 0.093668 H -0.837398 -1.226414 -0.534914 C 0.386079 0.487195 -0.056646 H 0.428717 0.854627 -1.095080 C 1.608849 -0.428934 0.161482 H 1.481259 -1.331029 -0.4549…	0	0	0	0	0	4	0	0	0	0	0	0	0	5	0	2	0	3	0
157	3120	CCC[C@@H](C)CCCC(C)C	C11H24	35	-67.9172	C -4.780622 -0.818874 -0.572613 H -4.643205 -1.109806 -1.621006 H -5.759381 -0.332258 -0.484421 H -4.812750 -1.738750 0.026151 C -3.651566 0.106895 -0.095033 C -2.280431 -0.573693 -0.279741 H -2.232187 -1.461009 0.370672 C -1.060712 0.320415 -0.012208 H -1.057409 0.648292 1.036534 C 0.268037 -0.388036 -0.314945 H 0.288703 -1.337483 0.240131 C 1.542012 0.409244 0.036457 H 1.467842 0.700929 1.09696…	0	0	0	0	0	4	0	0	0	0	0	0	0	5	0	2	0	3	0
158	3121	CC[C@H](C)CCCCC(C)C	C11H24	35	-67.9217	C 4.919397 0.886892 0.152097 H 4.752694 1.918088 -0.181826 H 5.882261 0.553867 -0.253520 H 5.008302 0.902107 1.246447 C 3.776237 -0.038156 -0.292166 C 2.424790 0.478848 0.240662 H 2.433179 0.429887 1.340796 C 1.184527 -0.252921 -0.291063 H 1.212942 -1.309646 0.007545 C -0.134626 0.365704 0.193631 H -0.154563 0.358630 1.293986 C -1.374175 -0.367172 -0.338926 H -1.279818 -1.434441 -0.089725 C -2.72…	0	0	0	0	0	4	0	0	0	0	0	0	0	5	0	2	0	3	0
159	3122	CC(C)CCCCCC(C)C	C11H24	35	-68.6597	C 4.113821 1.469283 0.185984 H 3.320536 2.154060 -0.132224 H 5.064057 1.868878 -0.188045 H 4.154325 1.491166 1.283344 C 3.882217 0.037934 -0.322337 C 2.561816 -0.567511 0.194916 H 2.514092 -1.619801 -0.122228 C 1.283969 0.141684 -0.274852 H 1.286953 0.203727 -1.373654 C 0.000000 -0.560616 0.187475 H 0.000000 -1.597433 -0.180627 C -1.283970 0.141684 -0.274852 H -1.286954 0.203726 -1.373654 C -2.56…	0	0	0	0	0	4	0	0	0	0	0	0	0	5	0	2	0	2	0
160	3123	CCCCCCC(C)(C)CC	C11H24	35	-67.9459	C 4.699635 -0.509452 -0.000028 H 4.949468 0.086177 -0.884862 H 5.361109 -1.383590 -0.000194 H 4.949440 0.085819 0.885054 C 3.232878 -0.959401 -0.000142 C 2.144327 0.151192 0.000044 C 0.772258 -0.580371 -0.000098 H 0.740469 -1.244074 0.877269 C -0.499919 0.280786 0.000029 H -0.512284 0.939776 0.878649 C -1.781545 -0.565432 -0.000112 H -1.779680 -1.228216 0.878147 C -3.067661 0.270704 0.000010 H -3…	0	0	0	0	0	4	0	0	0	0	0	0	0	6	0	0	1	4	0
161	3124	CCCCC[C@@H](C)[C@@H](C)CC	C11H24	35	-66.313	C 4.091507 -1.678499 -0.362211 H 4.774396 -1.019249 -0.912904 H 4.203665 -2.688762 -0.772470 H 4.429404 -1.710322 0.679431 C 2.640009 -1.197283 -0.483986 C 2.405789 0.256758 -0.018242 C 1.020394 0.799070 -0.481375 H 0.938001 0.539023 -1.548908 C -0.173078 0.135072 0.240386 H -0.011870 -0.950416 0.287809 C -1.539349 0.384265 -0.416899 H -1.495531 0.073305 -1.471636 C -2.687736 -0.357500 0.280154 H…	0	0	0	0	0	4	0	0	0	0	0	0	0	5	0	2	0	4	0
162	3125	CCC[C@@H](C)CC[C@@H](C)CC	C11H24	35	-67.1617	C 4.763517 -0.702551 -0.504643 H 5.011880 0.207398 -1.065475 H 5.309922 -1.534015 -0.964616 H 5.150971 -0.581243 0.512755 C 3.253250 -0.966711 -0.521433 C 2.379812 0.188952 0.010650 C 0.889193 -0.107084 -0.260428 H 0.601178 -0.999128 0.313691 C -0.068006 1.055685 0.045956 H -0.096782 1.249693 1.127622 C -1.515831 0.866915 -0.458316 H -1.463173 0.623994 -1.532257 C -2.226723 -0.304287 0.251205 H -…	0	0	0	0	0	4	0	0	0	0	0	0	0	5	0	2	0	4	0
163	3126	CC[C@H](C)CCC[C@@H](C)CC	C11H24	35	-67.2988	C -5.139644 -0.132278 0.492687 H -5.085000 0.498489 1.389018 H -5.911466 -0.890480 0.668444 H -5.483696 0.497014 -0.335285 C -3.786505 -0.789863 0.196818 C -2.603229 0.187875 0.036175 C -1.276808 -0.596772 -0.041446 H -1.275627 -1.208726 -0.956911 C 0.000000 0.256182 -0.000001 H 0.042749 0.915449 -0.877799 C 1.276808 -0.596772 0.041445 H 1.245493 -1.308960 -0.796377 C 2.603229 0.187875 -0.036175 …	0	0	0	0	0	4	0	0	0	0	0	0	0	5	0	2	0	4	0
164	3127	CCCCCC(C)(C)CCC	C11H24	35	-68.5976	C -2.732544 2.761627 0.196231 H -3.745530 2.561819 0.567034 H -2.797553 3.587075 -0.522012 H -2.132831 3.107203 1.047501 C -2.119329 1.510004 -0.442970 C -2.014518 0.341689 0.548609 C -1.439245 -0.998003 0.013977 C -0.021901 -0.830127 -0.598571 H 0.312904 -1.820082 -0.943212 C 1.069100 -0.233475 0.303083 H 1.175797 -0.834431 1.216389 C 2.432974 -0.149211 -0.396940 H 2.735812 -1.154539 -0.726213 C…	0	0	0	0	0	4	0	0	0	0	0	0	0	6	0	0	1	4	0
165	3128	CCCC[C@H](C)[C@H](C)CCC	C11H24	35	-66.2937	C -3.971702 -1.999794 0.436503 H -3.294260 -2.838238 0.640867 H -4.855962 -2.402125 -0.071154 H -4.297867 -1.596732 1.403373 C -3.282187 -0.922817 -0.408256 C -2.034836 -0.339838 0.273585 C -1.260163 0.694028 -0.572758 C 0.162522 1.008682 -0.019746 H 0.559214 1.812800 -0.660074 C 1.120487 -0.192878 -0.178367 H 0.979183 -0.624021 -1.180684 C 2.609490 0.140278 -0.001788 H 2.882519 0.957958 -0.68603…	0	0	0	0	0	4	0	0	0	0	0	0	0	5	0	2	0	4	0
166	3129	CCC[C@@H](C)C[C@H](C)CCC	C11H24	35	-67.3018	C -0.086953 5.030004 0.962486 H -0.957886 4.904732 1.617725 H -0.173921 6.008299 0.475850 H 0.804808 5.054096 1.601089 C 0.000000 3.897796 -0.067091 C 0.121460 2.512306 0.583159 C 0.116950 1.316289 -0.393371 C 0.000000 0.000000 0.405949 H 0.874984 -0.074827 1.069968 C -0.116950 -1.316289 -0.393371 H 0.777990 -1.419204 -1.025246 C -0.121460 -2.512306 0.583159 H 0.712731 -2.388372 1.289604 C 0.0000…	0	0	0	0	0	4	0	0	0	0	0	0	0	5	0	2	0	4	0
167	3130	CCCCC(C)(C)CCCC	C11H24	35	-68.6057	C -3.673400 -2.157434 0.301158 H -2.986724 -2.908592 0.710897 H -4.440330 -2.687359 -0.275405 H -4.171558 -1.669542 1.148162 C -2.926434 -1.137541 -0.564414 C -1.841090 -0.370024 0.204003 C -1.097904 0.644152 -0.678016 C 0.000000 1.508500 0.000000 C 1.097906 0.644155 0.678015 H 0.650894 0.106483 1.526183 C 1.841094 -0.370019 -0.204005 H 1.130829 -1.092732 -0.629330 C 2.926431 -1.137545 0.564415 H…	0	0	0	0	0	4	0	0	0	0	0	0	0	6	0	0	1	4	0
168	3131	CCCCCCC(CC)CC	C11H24	35	-65.8078	C -2.444178 2.505585 -0.169392 H -3.056731 2.685006 0.723294 H -2.774040 3.208137 -0.943439 H -1.409074 2.760412 0.083653 C -2.581306 1.056550 -0.652654 C -2.262588 -0.015936 0.411557 C -0.831291 0.096905 0.989461 C 0.324129 -0.077302 -0.008428 C 1.703757 0.015809 0.658323 H 1.778641 -0.749268 1.445545 C 2.872056 -0.150773 -0.321719 H 2.781549 -1.120297 -0.834298 C 4.250990 -0.059422 0.344530 H 4…	0	0	0	0	0	3	0	0	0	0	0	0	0	7	0	1	0	3	0
169	3132	CCCCC[C@@H](CC)CCC	C11H24	35	-65.5388	C 3.542790 -2.633894 0.063605 H 3.880112 -2.560075 1.104919 H 4.395813 -2.965266 -0.539721 H 2.778552 -3.419870 0.019993 C 2.989732 -1.294615 -0.435642 C 1.780543 -0.807666 0.375900 C 1.191317 0.547508 -0.076795 C -0.251335 0.732104 0.446002 C -1.316558 -0.101397 -0.281043 H -1.063227 -1.169603 -0.231587 C -2.730468 0.100292 0.280052 H -2.739569 -0.166140 1.347641 C -3.804131 -0.714795 -0.452442 …	0	0	0	0	0	3	0	0	0	0	0	0	0	7	0	1	0	3	0
170	3133	CCCCC(CC)CCCC	C11H24	35	-65.5747	C -4.577883 -1.532858 -0.401548 H -5.129226 -0.584357 -0.402980 H -5.226676 -2.293988 0.046960 H -4.406404 -1.815880 -1.447530 C -3.255301 -1.403416 0.361002 C -2.314468 -0.346542 -0.233064 C -0.981992 -0.228722 0.520727 C -0.007357 0.834355 -0.035220 C 1.436723 0.576390 0.451285 H 1.418050 0.412947 1.540025 C 2.151745 -0.598905 -0.230622 H 1.572645 -1.524171 -0.102476 C 3.575357 -0.829064 0.2940…	0	0	0	0	0	3	0	0	0	0	0	0	0	7	0	1	0	3	0
171	3134	CCCCC(CCC)CCC	C11H24	35	-65.5194	C 2.937413 -3.092405 -0.002534 H 3.889244 -2.561405 -0.128076 H 2.996166 -4.022012 -0.580325 H 2.848991 -3.363760 1.056761 C 1.755882 -2.226384 -0.452832 C 1.652818 -0.905488 0.323246 C 0.466123 -0.001106 -0.080256 C -0.868557 -0.554569 0.469216 C -2.128564 -0.020948 -0.227175 H -2.079872 -0.269728 -1.297980 C -3.430062 -0.581868 0.361453 H -3.407762 -1.679842 0.309205 C -4.686521 -0.062990 -0.34…	0	0	0	0	0	3	0	0	0	0	0	0	0	7	0	1	0	3	0
172	3135	CCCC[C@H](CCC)C(C)C	C11H24	35	-65.933	C -2.805507 2.927578 0.105010 H -3.201232 2.757603 1.114040 H -3.613840 3.351193 -0.502110 H -2.016046 3.685304 0.184329 C -2.267772 1.628618 -0.505405 C -1.123392 1.014462 0.314402 C -0.513451 -0.280891 -0.270429 C 0.886208 -0.553428 0.330184 C 2.004779 0.328478 -0.244568 H 1.754697 1.391287 -0.117414 C 3.375278 0.062129 0.392141 H 3.310060 0.233814 1.476071 C 4.493812 0.928984 -0.195226 H 4.282…	0	0	0	0	0	4	0	0	0	0	0	0	0	5	0	2	0	4	0
173	3136	CCCCC[C@H](CC)C(C)C	C11H24	35	-65.9828	C -2.677224 -1.334650 1.285405 H -1.837873 -1.980773 1.568584 H -3.588077 -1.943419 1.330982 H -2.767547 -0.552403 2.047484 C -2.491182 -0.751992 -0.125991 C -1.295558 0.239812 -0.241449 C 0.035040 -0.358557 0.273625 C 1.294475 0.296140 -0.314064 C 2.598559 -0.295181 0.237282 H 2.615625 -1.379195 0.048519 C 3.861441 0.340421 -0.358438 H 3.844593 0.222983 -1.451409 C 5.158768 -0.254611 0.198636 H …	0	0	0	0	0	4	0	0	0	0	0	0	0	5	0	2	0	4	0
174	3137	CCCCCC(C)(CC)CC	C11H24	35	-67.4811	C -1.623363 2.302777 -0.056547 H -0.646388 2.425362 -0.537604 H -1.812026 3.206949 0.533807 H -2.379503 2.266936 -0.848940 C -1.671108 1.059840 0.841419 C -1.422854 -0.308776 0.151250 C -0.025865 -0.363996 -0.531060 C 1.205884 -0.070822 0.339005 C 2.522366 -0.211960 -0.438759 H 2.506068 0.461711 -1.308759 C 3.768515 0.084794 0.405400 H 3.695883 1.103474 0.812509 C 5.077747 -0.059504 -0.377288 H 5…	0	0	0	0	0	4	0	0	0	0	0	0	0	6	0	0	1	6	0
175	3138	CCCC[C@H](C)C(CC)CC	C11H24	35	-65.2087	C 2.968888 2.179588 -0.528418 H 3.897761 1.617777 -0.678633 H 3.239490 3.144108 -0.083241 H 2.540313 2.379127 -1.518443 C 1.971317 1.425179 0.360103 C 1.537398 0.049738 -0.200654 C 0.179919 -0.444442 0.386117 C -1.011890 0.339683 -0.207058 C -2.396864 -0.242936 0.111028 H -2.580391 -0.215435 1.193722 C -3.538545 0.494394 -0.602117 H -3.512138 1.557691 -0.323728 C -4.922158 -0.081662 -0.284039 H -…	0	0	0	0	0	4	0	0	0	0	0	0	0	5	0	2	0	5	0
176	3139	CCC[C@@H](C)CC(CC)CC	C11H24	35	-65.8898	C 2.923303 -2.197940 -0.082421 H 3.146641 -2.155623 0.990893 H 3.736292 -2.749443 -0.568696 H 2.008419 -2.788511 -0.205397 C 2.787277 -0.788345 -0.670610 C 1.660903 0.066358 -0.046529 C 0.270793 -0.416024 -0.523143 C -0.937740 0.006680 0.342830 C -2.247962 -0.186320 -0.449575 H -2.368052 -1.254579 -0.689412 C -3.521416 0.321788 0.241128 H -3.695114 -0.235667 1.170318 C -4.763733 0.208326 -0.64948…	0	0	0	0	0	4	0	0	0	0	0	0	0	5	0	2	0	5	0
177	3140	CC[C@H](C)CCC(CC)CC	C11H24	35	-65.9266	C -2.929827 2.221237 0.470149 H -3.094155 2.013895 1.534880 H -3.735705 2.883367 0.132923 H -1.990921 2.780011 0.384459 C -2.908541 0.922257 -0.344535 C -1.799637 -0.075283 0.059194 C -0.409485 0.410645 -0.414190 C 0.771482 -0.217905 0.341770 C 2.169006 0.113231 -0.223962 C 3.244065 -0.721331 0.504032 H 3.283835 -0.410261 1.558767 C 4.649844 -0.645987 -0.103490 H 5.073422 0.362387 -0.042767 H 4.6…	0	0	0	0	0	4	0	0	0	0	0	0	0	5	0	2	0	5	0
178	3141	CCC(CC)CCCC(C)C	C11H24	35	-66.6515	C 3.330677 -2.150624 0.365119 H 4.283225 -1.608964 0.356576 H 3.523103 -3.155061 -0.029451 H 3.021951 -2.259122 1.412318 C 2.248931 -1.436917 -0.454785 C 1.901640 -0.011814 0.032139 C 0.548703 0.461285 -0.545700 C -0.691640 -0.187316 0.087634 C -2.005271 0.318421 -0.526029 C -3.286136 -0.353830 0.007869 C -3.515009 -0.083570 1.502995 H -3.609812 0.993851 1.694001 H -2.693612 -0.460879 2.121399 H …	0	0	0	0	0	4	0	0	0	0	0	0	0	5	0	2	0	4	0
179	3142	CCCC[C@@H](CC)CC(C)C	C11H24	35	-66.5984	C -3.283715 -1.768433 -0.823945 H -3.515407 -1.305180 -1.790484 H -4.232017 -2.043538 -0.346776 H -2.732043 -2.696626 -1.023955 C -2.462578 -0.824159 0.067854 C -1.141275 -0.439612 -0.632330 C -0.345123 0.733524 -0.014443 C 1.123988 0.716532 -0.495187 C 2.006477 -0.359456 0.153555 C 3.449867 -0.354895 -0.367559 C 4.334849 -1.416554 0.293635 H 3.939941 -2.425473 0.121099 H 4.391159 -1.265915 1.378…	0	0	0	0	0	4	0	0	0	0	0	0	0	5	0	2	0	4	0
180	3143	CCCC[C@@H](CC)[C@@H](C)CC	C11H24	35	-64.4434	C -3.406310 -1.888378 -0.607932 H -2.945138 -2.785227 -0.175274 H -3.835242 -2.170845 -1.576364 H -4.236715 -1.595766 0.044056 C -2.377440 -0.762309 -0.771690 C -1.667964 -0.352197 0.537292 C -0.397594 0.518198 0.295330 C 0.738638 -0.302753 -0.380081 C 2.096151 -0.211043 0.334295 C 3.203434 -1.020065 -0.352968 C 4.549198 -0.944506 0.375712 H 4.467591 -1.329788 1.399661 H 4.907407 0.090403 0.44066…	0	0	0	0	0	4	0	0	0	0	0	0	0	5	0	2	0	5	0
181	3144	CCCC[C@@](C)(CC)CCC	C11H24	35	-67.4656	C -2.648055 -2.722710 -0.482515 H -3.610851 -2.327701 -0.829675 H -2.852692 -3.607718 0.130966 H -2.089510 -3.052653 -1.367336 C -1.865869 -1.664493 0.305011 C -1.561535 -0.419489 -0.541835 C -0.816606 0.760113 0.146374 C 0.524045 0.302679 0.783064 C 1.569708 -0.319163 -0.154289 C 2.852526 -0.732473 0.581342 C 3.905542 -1.353879 -0.341874 H 4.205918 -0.652039 -1.129799 H 3.519567 -2.255551 -0.833…	0	0	0	0	0	4	0	0	0	0	0	0	0	6	0	0	1	6	0
182	3145	CCC[C@@H](C)[C@@H](CC)CCC	C11H24	35	-65.188	C 3.382448 -2.367925 0.027826 H 3.821673 -2.121406 1.002443 H 4.197114 -2.684294 -0.633788 H 2.718680 -3.229173 0.174129 C 2.619873 -1.172903 -0.554286 C 1.457266 -0.713072 0.338495 C 0.675915 0.506767 -0.205578 C -0.776833 0.596619 0.353783 C -1.696021 -0.467105 -0.286532 C -3.193878 -0.295572 0.007013 C -4.065074 -1.305526 -0.748187 H -3.801497 -2.335853 -0.478615 H -3.938075 -1.206326 -1.83335…	0	0	0	0	0	4	0	0	0	0	0	0	0	5	0	2	0	5	0
183	3146	CCC[C@H](CC)C[C@@H](C)CC	C11H24	35	-65.9662	C -3.815387 -1.961181 -0.167396 H -4.636512 -1.246437 -0.030941 H -4.073691 -2.873659 0.382266 H -3.773924 -2.215319 -1.233819 C -2.483890 -1.374807 0.314270 C -2.097990 -0.083554 -0.421430 C -0.749805 0.535766 0.011581 C 0.439542 -0.268035 -0.565117 C 1.802385 -0.078410 0.138226 C 2.940356 -0.596915 -0.766454 C 4.357973 -0.349084 -0.237644 H 4.554242 -0.896899 0.690370 H 4.524317 0.716810 -0.035…	0	0	0	0	0	4	0	0	0	0	0	0	0	5	0	2	0	5	0
184	3147	CCC[C@H](CC)CCC(C)C	C11H24	35	-66.595	C 3.815017 -2.155147 0.018267 H 4.679628 -1.480966 -0.021994 H 4.051901 -3.036835 -0.588341 H 3.704008 -2.486470 1.058199 C 2.544398 -1.457498 -0.479261 C 2.191261 -0.206025 0.337599 C 0.910942 0.531671 -0.114987 C -0.357744 -0.243865 0.308984 C -1.635767 0.152215 -0.446592 C -2.882712 -0.688117 -0.102305 C -3.329117 -0.510831 1.357238 H -3.578112 0.538791 1.563585 H -2.552226 -0.814858 2.066747 …	0	0	0	0	0	4	0	0	0	0	0	0	0	5	0	2	0	4	0
185	3148	CCCCC[C@@H](C)C(C)(C)C	C11H24	35	-67.9455	C 3.700878 0.401542 -0.552644 H 3.575494 0.717804 -1.596230 H 4.578893 -0.254301 -0.508802 H 3.928141 1.290987 0.043837 C 2.449877 -0.342578 -0.037560 C 1.162530 0.523033 -0.287372 C -0.124650 -0.097747 0.309853 C -1.422842 0.365325 -0.369632 C -2.683690 -0.246008 0.255769 C -3.984330 0.196137 -0.427292 C -5.238175 -0.417790 0.203924 H -5.326828 -0.138920 1.261260 H -5.211623 -1.513377 0.153235 H…	0	0	0	0	0	5	0	0	0	0	0	0	0	4	0	1	1	5	0
186	3149	CCCC[C@H](C)CC(C)(C)C	C11H24	35	-68.2602	C 3.685663 -0.670147 -0.913644 H 3.405871 -1.524476 -1.542627 H 4.601547 -0.939549 -0.373061 H 3.924338 0.169836 -1.577783 C 2.551870 -0.302581 0.064988 C 1.285238 0.024633 -0.774781 C 0.022049 0.523171 -0.018746 C -1.242708 -0.177092 -0.562407 C -2.548796 0.146232 0.175625 C -3.742558 -0.679524 -0.323298 C -5.049983 -0.354436 0.406290 H -5.323017 0.700577 0.279814 H -4.960991 -0.544983 1.483048 …	0	0	0	0	0	5	0	0	0	0	0	0	0	4	0	1	1	4	1
187	3150	CCC[C@@H](C)CCC(C)(C)C	C11H24	35	-69.6124	C 3.843818 0.631051 -0.699308 H 3.712655 0.664369 -1.788151 H 4.829854 0.195800 -0.494843 H 3.852350 1.664985 -0.332268 C 2.724605 -0.190127 -0.027744 C 1.368350 0.485476 -0.370507 C 0.103171 -0.147807 0.229581 C -1.223269 0.476838 -0.258715 C -2.415509 -0.374715 0.226716 C -3.782319 0.001097 -0.363125 C -4.899864 -0.950679 0.078111 H -5.011797 -0.951265 1.169495 H -4.688816 -1.981686 -0.231813 H…	0	0	0	0	0	5	0	0	0	0	0	0	0	4	0	1	1	4	0
188	3151	CC[C@H](C)CCCC(C)(C)C	C11H24	35	-69.7431	C 3.945569 -0.930191 -0.619963 H 3.844663 -1.979724 -0.316494 H 4.950340 -0.594886 -0.334429 H 3.878725 -0.891232 -1.714424 C 2.860446 -0.053089 0.036497 C 1.475951 -0.589864 -0.415625 C 0.228955 0.127864 0.123974 C -1.071452 -0.492453 -0.410372 C -2.375053 0.094461 0.170530 C -3.582652 -0.754583 -0.280004 C -4.914417 -0.402574 0.393381 H -5.250053 0.609597 0.142801 H -4.833501 -0.464863 1.486006…	0	0	0	0	0	5	0	0	0	0	0	0	0	4	0	1	1	4	0
189	3152	CCCCCC(C)(C)C(C)C	C11H24	35	-67.9033	C -1.753799 1.910803 0.716187 H -2.397888 1.722506 1.583474 H -2.043934 2.884585 0.304030 H -0.725022 2.004004 1.077911 C -1.907902 0.817024 -0.356445 C -1.458954 -0.610482 0.117015 C 0.000560 -0.593892 0.659682 C 1.103786 -0.076719 -0.276062 C 2.502852 -0.186657 0.347150 C 3.623315 0.330110 -0.564457 C 5.015733 0.216281 0.064623 H 5.258786 -0.826535 0.303423 H 5.077582 0.790861 0.997158 H 3.4237…	0	0	0	0	0	5	0	0	0	0	0	0	0	4	0	1	1	6	0
190	3153	CCCC[C@H](C)[C@H](C)C(C)C	C11H24	35	-66.5695	C 1.915670 -1.774265 1.097685 H 2.389540 -1.336849 1.986719 H 2.356456 -2.766509 0.945374 H 0.855082 -1.921830 1.323407 C 2.142400 -0.890235 -0.141389 C 1.655204 0.576260 0.056714 C 0.202544 0.695349 0.614415 C -0.872393 0.161224 -0.356859 C -2.278337 0.029136 0.248517 C -3.290865 -0.608740 -0.712312 C -4.694948 -0.738021 -0.112921 H -5.099692 0.243233 0.164409 H -4.684035 -1.357753 0.792312 H -2…	0	0	0	0	0	5	0	0	0	0	0	0	0	3	0	3	0	5	0
191	3154	CCC[C@@H](C)C[C@H](C)C(C)C	C11H24	35	-67.5027	C -4.022974 0.487695 -0.528577 H -4.386297 0.659392 0.491876 H -4.828685 -0.012200 -1.079501 H -3.858276 1.467295 -0.993757 C -2.742219 -0.362983 -0.544732 C -1.532861 0.390404 0.085238 C -0.197705 -0.289232 -0.291331 C 1.105009 0.447657 0.094547 C 2.319801 -0.436523 -0.261720 C 3.674039 0.053062 0.270787 C 4.817598 -0.921097 -0.033854 H 4.934271 -1.069523 -1.114590 H 4.631675 -1.904551 0.415398 …	0	0	0	0	0	5	0	0	0	0	0	0	0	3	0	3	0	5	0
192	3155	CC(C)CCC[C@H](C)C(C)C	C11H24	35	-68.1721	C 4.157449 -0.760537 -0.745342 H 4.574836 -1.037988 0.230005 H 4.969198 -0.309434 -1.328538 H 3.854061 -1.683784 -1.254113 C 2.978940 0.216994 -0.607184 C 1.733510 -0.450596 0.045090 C 0.468484 0.417981 -0.129828 C -0.857840 -0.302874 0.157320 C -2.083051 0.578397 -0.126666 C -3.444850 -0.045879 0.238086 C -4.568888 0.990808 0.090681 H -4.656730 1.328126 -0.950577 H -4.381701 1.875226 0.711508 H …	0	0	0	0	0	5	0	0	0	0	0	0	0	3	0	3	0	4	0
193	3156	CCCCC(C)(C)CC(C)C	C11H24	35	-67.1466	C -3.785249 -1.252230 -0.321696 H -3.850652 -1.427139 -1.403748 H -4.801394 -1.062349 0.045088 H -3.426871 -2.178574 0.142839 C -2.848515 -0.072507 -0.012948 C -1.416331 -0.350728 -0.545887 C -0.205291 0.056631 0.345088 C 1.070420 -0.204934 -0.505114 C 2.434548 0.038834 0.157682 C 3.607642 -0.233664 -0.795217 C 4.977080 0.000782 -0.149489 H 5.121290 -0.649682 0.722124 H 5.082083 1.037970 0.192335…	0	0	0	0	0	5	0	0	0	0	0	0	0	4	0	1	1	5	1
194	3157	CCC[C@@H](C)[C@@H](C)CC(C)C	C11H24	35	-67.4664	C 3.541767 0.617903 -0.551747 H 3.456095 0.506242 -1.640975 H 4.607184 0.568361 -0.296819 H 3.187867 1.621418 -0.291597 C 2.753508 -0.483115 0.173997 C 1.254162 -0.484966 -0.195129 C 0.453383 0.799246 0.115061 C -0.983436 0.732643 -0.488479 C -1.922376 -0.242140 0.256236 C -3.196665 -0.619337 -0.514801 C -4.068058 -1.631518 0.236882 H -4.392420 -1.232810 1.206147 H -3.519130 -2.561543 0.430377 H …	0	0	0	0	0	5	0	0	0	0	0	0	0	3	0	3	0	5	0
195	3158	CC(C)CC[C@@H](C)CC(C)C	C11H24	35	-69.2344	C -3.460349 -1.203794 -0.836091 H -3.298872 -0.960928 -1.894941 H -4.489241 -1.569035 -0.733459 H -2.789952 -2.031100 -0.578862 C -3.225363 0.029545 0.049224 C -1.801363 0.603995 -0.102163 C -0.617695 -0.323560 0.248440 C 0.711901 0.389823 -0.081325 C 1.965399 -0.492949 0.019130 C 3.256694 0.151877 -0.525199 C 3.668816 1.402430 0.266575 H 3.846850 1.154441 1.321636 H 2.901711 2.183328 0.232359 H …	0	0	0	0	0	5	0	0	0	0	0	0	0	3	0	3	0	4	0
196	3159	CCCC(C)(C)CCC(C)C	C11H24	35	-69.7426	C 2.822649 0.923146 1.286162 H 2.502560 1.928993 0.982337 H 3.858773 0.998393 1.637324 H 2.207177 0.620366 2.139867 C 2.711825 -0.061898 0.112110 C 1.271658 -0.183174 -0.430225 C 0.260176 -0.760446 0.572272 C -1.170063 -1.053594 0.038914 C -1.833587 0.202018 -0.589131 C -1.968766 1.447355 0.299714 C -2.661664 2.606833 -0.426037 H -3.673046 2.326819 -0.745838 H -2.103657 2.904261 -1.322637 H -0.97…	0	0	0	0	0	5	0	0	0	0	0	0	0	4	0	1	1	5	0
197	3160	CC[C@H](C)[C@H](C)CCC(C)C	C11H24	35	-67.4928	C -4.148174 -0.564122 -0.845300 H -4.538451 0.462123 -0.829690 H -4.943233 -1.225979 -0.481451 H -3.944923 -0.826198 -1.890620 C -2.883671 -0.683243 0.018723 C -1.758628 0.209135 -0.544071 C -0.392201 0.033644 0.138820 C 0.769556 0.766072 -0.568746 C 2.177496 0.338166 -0.056677 C 2.523553 -1.110970 -0.464462 C 4.003790 -1.480285 -0.304504 H 4.325868 -1.448224 0.742096 H 4.646092 -0.794117 -0.8708…	0	0	0	0	0	5	0	0	0	0	0	0	0	3	0	3	0	5	0
198	3161	CCC(C)(C)CCCC(C)C	C11H24	35	-69.7542	C 3.397809 -1.021400 -0.957208 H 3.568593 -1.838155 -0.243042 H 4.310382 -0.908200 -1.554625 H 2.596736 -1.333654 -1.635640 C 3.058012 0.283867 -0.221253 C 1.788303 0.161995 0.645056 C 0.488406 -0.110271 -0.127451 C -0.742859 -0.111347 0.791911 C -2.118734 -0.415381 0.139183 C -2.450790 0.566025 -1.017463 C -2.459726 2.061355 -0.675082 H -1.478705 2.410471 -0.333460 H -3.188162 2.300075 0.107672 …	0	0	0	0	0	5	0	0	0	0	0	0	0	4	0	1	1	5	0
199	3162	CC(C)CCCCC(C)(C)C	C11H24	35	-70.5073	C 4.664668 -0.997060 0.039217 H 4.749894 -1.102169 1.128903 H 5.640277 -0.668763 -0.338863 H 4.461041 -1.991713 -0.375348 C 3.557626 0.001862 -0.330237 C 2.186510 -0.505592 0.159718 C 0.975838 0.312898 -0.310225 C -0.367127 -0.298685 0.116593 C -1.570030 0.531802 -0.354990 C -2.985635 0.008119 0.007495 C -4.018392 1.000775 -0.563202 H -3.927840 1.084520 -1.653439 H -3.881672 2.003314 -0.138882 H …	0	0	0	0	0	5	0	0	0	0	0	0	0	4	0	1	1	3	0
200	3163	CCCC[C@H](C)C(C)(C)CC	C11H24	35	-66.9763	C 3.063240 -1.409916 -1.026065 H 2.283312 -2.174614 -0.940015 H 4.029612 -1.917758 -0.926190 H 3.014609 -1.000051 -2.040826 C 2.926538 -0.316713 0.042155 C 1.621422 0.531511 0.025037 C 0.346120 -0.375641 0.174320 C -0.975924 0.428052 0.265836 C -2.226656 -0.364584 -0.144968 C -3.522131 0.450272 -0.031561 C -4.768381 -0.332634 -0.457513 H -4.904345 -1.228742 0.160658 H -4.692741 -0.660918 -1.50158…	0	0	0	0	0	5	0	0	0	0	0	0	0	4	0	1	1	7	0
201	3164	CCC[C@@H](C)CC(C)(C)CC	C11H24	35	-66.8273	C -4.185030 -0.639892 -0.318452 H -4.205913 -1.501070 0.358325 H -4.892175 -0.847155 -1.129994 H -4.567723 0.226860 0.231694 C -2.784007 -0.389264 -0.891398 C -1.649342 -0.062427 0.120554 C -0.342265 0.076302 -0.714245 C 0.952039 0.522061 0.022507 C 2.147379 -0.355675 -0.408767 C 3.465952 -0.091363 0.330772 C 4.571383 -1.079736 -0.057428 H 4.788999 -1.028482 -1.131521 H 4.278940 -2.112270 0.17037…	0	0	0	0	0	5	0	0	0	0	0	0	0	4	0	1	1	6	1
202	3165	CCCCC(C)(C)[C@H](C)CC	C11H24	35	-66.8706	C 3.337854 -1.726097 -0.647879 H 3.279962 -2.450994 0.171599 H 4.395889 -1.619767 -0.914319 H 2.820524 -2.161610 -1.511889 C 2.730801 -0.368176 -0.269696 C 1.227677 -0.431053 0.101527 C 0.492879 0.953156 -0.023853 C -0.986478 0.857660 0.451987 C -1.897318 -0.156553 -0.256536 C -3.335784 -0.132064 0.280423 C -4.258514 -1.136406 -0.417583 H -3.893161 -2.163437 -0.293592 H -4.320035 -0.936340 -1.494…	0	0	0	0	0	5	0	0	0	0	0	0	0	4	0	1	1	7	0
203	3166	CCC[C@@H](C)[C@@H](C)[C@H](C)CC	C11H24	35	-65.2091	C 4.232682 -0.257586 -0.779962 H 4.647170 -0.577989 0.182383 H 5.006167 0.329074 -1.289042 H 4.051287 -1.158508 -1.379536 C 2.947167 0.562032 -0.609322 C 1.780896 -0.216838 0.041798 C 0.411468 0.491272 -0.193724 C -0.830995 -0.373174 0.193626 C -2.134177 0.223664 -0.393531 C -3.430878 -0.271371 0.265036 C -4.685608 0.361076 -0.347343 H -4.768450 0.123435 -1.415167 H -4.665768 1.454028 -0.253783 H…	0	0	0	0	0	5	0	0	0	0	0	0	0	3	0	3	0	6	0
204	3167	CCCC(C)(C)C[C@H](C)CC	C11H24	35	-66.9869	C 3.337007 1.687494 -0.133617 H 4.183446 1.019775 -0.326963 H 3.723144 2.553907 0.415694 H 2.969310 2.047271 -1.103188 C 2.222129 0.993493 0.656979 C 1.521709 -0.171595 -0.076940 C 0.340092 -0.715736 0.773965 C -0.994441 -1.049206 0.046514 C -1.642935 0.205795 -0.601536 C -2.004298 1.380612 0.319952 C -2.665961 2.533571 -0.444519 H -3.593001 2.206355 -0.931464 H -2.003132 2.923526 -1.226996 H -2.…	0	0	0	0	0	5	0	0	0	0	0	0	0	4	0	1	1	6	1
205	3168	CC[C@@H](C)C[C@@H](C)[C@@H](C)CC	C11H24	35	-67.0066	C -3.919251 1.173056 -0.034032 H -4.336305 0.767285 0.894100 H -4.759308 1.369590 -0.710166 H -3.453901 2.137756 0.204765 C -2.909762 0.217956 -0.681767 C -1.636607 -0.051854 0.149507 C -0.616416 -0.828407 -0.711216 C 0.760053 -1.156573 -0.086742 C 1.536563 0.089644 0.433116 C 1.961833 1.063254 -0.687347 C 2.464863 2.423205 -0.185258 H 3.378717 2.330234 0.411640 H 1.710107 2.918368 0.438858 H 2.6…	0	0	0	0	0	5	0	0	0	0	0	0	0	3	0	3	0	6	0
206	3169	CC[C@@H](C)C[C@@H](C)CC(C)C	C11H24	35	-68.7797	C 4.191675 -1.130837 -0.434602 H 4.413822 -1.408669 0.601473 H 5.147885 -0.921945 -0.928076 H 3.749965 -2.006911 -0.926121 C 3.256836 0.081320 -0.521720 C 1.842861 -0.138730 0.058624 C 0.947300 1.066904 -0.301551 C -0.539818 1.015799 0.117064 C -1.272659 -0.175142 -0.536274 C -2.764995 -0.362026 -0.189009 C -3.347532 -1.536657 -0.990478 H -2.849510 -2.478701 -0.725289 H -3.220879 -1.386618 -2.069…	0	0	0	0	0	5	0	0	0	0	0	0	0	3	0	3	0	5	0
207	3170	CC[C@@H](C)CCC(C)(C)CC	C11H24	35	-68.8972	C 3.538272 1.465478 0.553589 H 3.656162 1.955163 -0.421323 H 4.459500 1.635669 1.122666 H 2.728729 1.977017 1.085434 C 3.270226 -0.035302 0.388050 C 2.051494 -0.397548 -0.488490 C 0.723593 0.058152 0.155505 C -0.509705 -0.109019 -0.747382 C -1.848120 0.483574 -0.225019 C -2.236165 -0.082797 1.167800 C -2.375100 -1.606399 1.280495 H -1.434762 -2.122247 1.055552 H -3.140725 -2.001006 0.603432 H -2.…	0	0	0	0	0	5	0	0	0	0	0	0	0	4	0	1	1	6	0
208	3171	CC[C@@H](C)CC[C@H](C)C(C)C	C11H24	35	-67.3964	C 4.654501 -0.581917 -0.365479 H 4.987710 -0.445336 0.669052 H 5.473513 -0.256836 -1.017407 H 4.508623 -1.657294 -0.528349 C 3.371946 0.201619 -0.669042 C 2.125834 -0.248349 0.122555 C 0.868455 0.460731 -0.424041 C -0.465797 -0.052983 0.142297 C -1.714658 0.519594 -0.564095 C -3.025069 -0.251387 -0.228238 C -3.048306 -1.660184 -0.843563 H -2.299416 -2.319146 -0.388026 H -2.852713 -1.627947 -1.922…	0	0	0	0	0	5	0	0	0	0	0	0	0	3	0	3	0	5	0
209	3172	CCC[C@@H](C)C(C)(C)CCC	C11H24	35	-66.8798	C -3.997153 -1.177085 -0.349774 H -4.093758 -1.565154 0.671916 H -4.348303 -1.956156 -1.036229 H -4.676568 -0.320634 -0.441801 C -2.550023 -0.772095 -0.655447 C -2.040639 0.322014 0.295434 C -0.592546 0.850216 0.077815 C 0.463680 -0.310521 0.173443 C 1.930430 0.178151 0.067129 C 2.922096 -0.898539 -0.401005 C 4.363817 -0.384838 -0.480262 H 4.717840 -0.044034 0.500601 H 4.446137 0.462248 -1.172661…	0	0	0	0	0	5	0	0	0	0	0	0	0	4	0	1	1	7	0
210	3173	CCCC(CCC)[C@@H](C)CC	C11H24	35	-65.099	C -3.971278 -0.726534 -0.475977 H -3.914968 -0.673232 -1.570304 H -4.924117 -0.279543 -0.169709 H -3.996962 -1.787807 -0.198889 C -2.782204 -0.012114 0.175276 C -1.428835 -0.624185 -0.216349 C -0.202365 0.087690 0.402576 C 0.087221 1.428084 -0.313258 C 0.925056 2.429231 0.495850 C 1.171180 3.742963 -0.254077 H -2.887797 -0.048871 1.268969 H -2.809800 1.051723 -0.095857 H -1.437501 -1.680193 0.085…	0	0	0	0	0	4	0	0	0	0	0	0	0	5	0	2	0	5	0
211	3174	CCCC(C)(CCC)CCC	C11H24	35	-67.2519	C 0.000039 3.485319 0.017608 H -0.884383 3.706914 0.627814 H 0.000049 4.177562 -0.832266 H 0.884463 3.706895 0.627819 C 0.000025 2.024793 -0.449231 C 0.000010 1.036713 0.726680 C -0.000006 -0.477453 0.381471 C 1.246269 -0.876577 -0.460652 C 2.632733 -0.541724 0.109986 C 3.766120 -1.040319 -0.794843 H 0.877277 1.852202 -1.086486 H -0.877227 1.852221 -1.086491 H 0.872557 1.249201 1.360187 H 1.16409…	0	0	0	0	0	4	0	0	0	0	0	0	0	6	0	0	1	6	0
212	3175	CCCC(CC)(CC)CCC	C11H24	35	-66.304	C 2.917184 -2.169583 0.541273 H 3.659296 -1.504453 1.000107 H 3.454139 -2.867670 -0.111291 H 2.456639 -2.754155 1.347397 C 1.863821 -1.372371 -0.237641 C 1.100290 -0.387933 0.661112 C 0.000002 0.491281 -0.000001 C -1.100262 -0.387961 -0.661117 C -1.863806 -1.372384 0.237642 C -2.917157 -2.169610 -0.541272 H 1.164450 -2.073123 -0.711826 H 2.357561 -0.833279 -1.056577 H 0.643790 -0.955168 1.484350 …	0	0	0	0	0	4	0	0	0	0	0	0	0	6	0	0	1	8	0
213	3176	CCCC(C)(CCC)C(C)C	C11H24	35	-66.3399	C -3.639088 -0.752393 -0.459462 H -3.629115 -0.468493 -1.519242 H -4.561398 -0.357403 -0.018080 H -3.689132 -1.847301 -0.412587 C -2.398436 -0.221047 0.268890 C -1.094915 -0.752597 -0.349629 C 0.243354 -0.391288 0.364162 C 0.319499 1.138608 0.640095 C 0.292604 2.080889 -0.572998 C 0.319572 3.557717 -0.160863 H -2.458460 -0.502330 1.328319 H -2.414279 0.875723 0.241917 H -1.176921 -1.845939 -0.399…	0	0	0	0	0	5	0	0	0	0	0	0	0	4	0	1	1	8	0
214	3177	CCCCC(CC)(CC)CC	C11H24	35	-66.5065	C -3.404044 -0.000004 -0.556771 H -3.643298 -0.884229 0.044472 H -4.081667 0.000035 -1.418504 H -3.643291 0.884175 0.044544 C -1.945159 0.000007 -1.032028 C -0.840171 0.000005 0.063446 C 0.522760 0.000000 -0.686799 C 1.803952 -0.000006 0.160592 C 3.077433 -0.000010 -0.697685 C 4.365422 -0.000016 0.132019 H -1.788437 0.871729 -1.680908 H -1.788430 -0.871709 -1.680916 H 1.823944 -0.877926 0.820954 …	0	0	0	0	0	4	0	0	0	0	0	0	0	6	0	0	1	8	0
215	3178	CCCC(CCC)C(C)(C)C	C11H24	35	-66.1391	C -1.747642 3.350637 0.182145 H -2.533574 3.085406 0.900414 H -2.179915 4.054428 -0.538490 H -0.962123 3.880785 0.735164 C -1.190683 2.105390 -0.515159 C -0.558325 1.101658 0.461156 C 0.022151 -0.181218 -0.206566 C 1.491828 -0.391628 0.231768 C 2.470799 0.620685 -0.382389 C 3.912840 0.424679 0.097794 H -0.435686 2.406909 -1.255172 H -1.991888 1.616443 -1.084170 H 1.836208 -1.396639 -0.040173 H 2.…	0	0	0	0	0	5	0	0	0	0	0	0	0	4	0	1	1	6	0
216	3179	CCCC[C@H](CC)C(C)(C)C	C11H24	35	-66.09	C 4.390347 -0.487943 -0.377926 H 4.256815 -1.400596 -0.971903 H 5.303610 -0.608288 0.216112 H 4.555525 0.339932 -1.078568 C 3.172096 -0.224203 0.513200 C 1.869209 -0.050544 -0.277618 C 0.648606 0.232719 0.611270 C -0.693035 0.410906 -0.161434 C -1.362830 1.748809 0.235780 C -0.618707 2.983093 -0.290323 H 3.350373 0.675066 1.120294 H 3.054888 -1.052427 1.226910 H -1.434975 1.809026 1.330414 H -2.3…	0	0	0	0	0	5	0	0	0	0	0	0	0	4	0	1	1	6	0
217	3180	CCCC(CCC)CC(C)C	C11H24	35	-66.5488	C -2.276896 3.389228 -0.096246 H -2.180143 3.620971 -1.164180 H -2.193583 4.331472 0.457552 H -3.288491 2.996343 0.065093 C -1.212648 2.380868 0.350169 C -1.310702 1.040529 -0.392450 C -0.246240 -0.007333 0.006099 C 1.130422 0.346102 -0.604063 C 2.363958 -0.323253 0.039461 C 3.598944 -0.140064 -0.856353 H -1.311591 2.199257 1.429943 H -0.217251 2.821843 0.207330 H 2.173502 -1.403559 0.121537 H 3.…	0	0	0	0	0	4	0	0	0	0	0	0	0	5	0	2	0	4	0
218	3181	CCC[C@H](CC(C)C)C(C)C	C11H24	35	-66.9183	C 3.330543 -2.172630 -0.262879 H 3.322861 -2.263076 -1.356181 H 3.571623 -3.158632 0.150858 H 4.146790 -1.490320 0.005347 C 1.984524 -1.659505 0.259801 C 1.621947 -0.269474 -0.284113 C 0.252163 0.266649 0.195669 C -0.904297 -0.416994 -0.572858 C -2.305532 -0.351739 0.073503 C -3.374441 -0.814464 -0.929028 H 2.010483 -1.617887 1.358080 H 1.199234 -2.382983 0.003109 H -2.526461 0.694899 0.329682 H …	0	0	0	0	0	5	0	0	0	0	0	0	0	3	0	3	0	5	0
219	3182	CCC[C@@H](C(C)C)[C@@H](C)CC	C11H24	35	-65.1197	C -2.846773 -2.509677 0.220168 H -2.244982 -3.256164 0.753587 H -3.480602 -3.044208 -0.496823 H -3.506180 -2.032305 0.955862 C -1.957006 -1.476999 -0.478886 C -1.042232 -0.713520 0.491421 C -0.138030 0.360824 -0.185436 C 1.379226 0.109248 0.069450 C 1.836756 -1.233034 -0.545588 C 3.358496 -1.412936 -0.620916 H -2.585753 -0.765611 -1.030960 H -1.336720 -1.979575 -1.234280 H 1.426354 -1.305262 -1.5…	0	0	0	0	0	5	0	0	0	0	0	0	0	3	0	3	0	6	0
220	3183	CCCCC(C(C)C)C(C)C	C11H24	35	-64.8921	C -4.522737 0.161742 -0.218493 H -4.551951 1.248937 -0.074333 H -5.413472 -0.261231 0.260132 H -4.600835 -0.029992 -1.295858 C -3.237198 -0.439320 0.359090 C -1.962778 0.123983 -0.284619 C -0.676265 -0.484506 0.294406 C 0.633145 -0.012394 -0.380125 C 1.827173 -0.988127 -0.116213 C 1.813766 -2.150994 -1.124410 H -3.254675 -1.531324 0.232820 H -3.204761 -0.260384 1.443369 H 0.893533 -2.743452 -1.03…	0	0	0	0	0	5	0	0	0	0	0	0	0	3	0	3	0	5	0
221	3184	CCC[C@@H](C)[C@H](CC)C(C)C	C11H24	35	-64.7079	C 4.255544 0.311794 -0.685713 H 4.078084 0.714074 -1.690836 H 5.185171 -0.268031 -0.718208 H 4.418236 1.163834 -0.013984 C 3.076096 -0.546842 -0.215682 C 1.755531 0.236334 -0.161559 C 0.514893 -0.605337 0.215482 C -0.806557 0.159246 -0.101201 C -0.951156 1.469160 0.732593 C -1.144138 2.735744 -0.111999 H 3.309278 -0.963836 0.772487 H 2.959264 -1.407086 -0.890543 H -0.284579 2.900591 -0.773008 H -…	0	0	0	0	0	5	0	0	0	0	0	0	0	3	0	3	0	6	0
222	3185	CC[C@H](C)C[C@H](CC)C(C)C	C11H24	35	-66.3757	C 3.593723 0.214524 -1.263773 H 3.452233 1.291542 -1.419064 H 3.933399 -0.214716 -2.213466 H 4.406083 0.088566 -0.539536 C 2.293652 -0.450553 -0.795746 C 1.702559 0.126981 0.508038 C 0.266055 -0.392349 0.753465 C -0.833087 0.248113 -0.129142 C -1.212729 1.645436 0.414597 C -1.997124 2.531939 -0.560532 H 2.461549 -1.529231 -0.657403 H 1.550884 -0.362643 -1.599340 H -1.439391 2.681178 -1.493660 H -…	0	0	0	0	0	5	0	0	0	0	0	0	0	3	0	3	0	6	0
223	3186	CCC[C@@H](CC)C(CC)CC	C11H24	35	-64.3299	C 3.871093 -1.191594 -0.256469 H 3.615512 -2.229485 -0.009079 H 4.850362 -0.975492 0.186053 H 3.977321 -1.129604 -1.346618 C 2.799920 -0.220609 0.251677 C 1.408278 -0.505392 -0.333156 C 0.305366 0.472699 0.137578 C -1.128642 -0.130261 0.014468 C -1.435880 -1.141729 1.143756 C -1.661385 -0.512297 2.524154 H 3.106552 0.807485 0.017019 H -0.782863 0.039404 2.877268 H -2.504662 0.189262 2.503410 H -1…	0	0	0	0	0	4	0	0	0	0	0	0	0	5	0	2	0	6	0
224	3187	CCC(CC)CC(CC)CC	C11H24	35	-65.3249	C -2.551681 -1.961121 -1.080319 H -1.661734 -2.320442 -1.609327 H -3.424627 -2.240402 -1.681611 H -2.614259 -2.507755 -0.131098 C -2.511583 -0.447187 -0.840058 C -1.309140 0.042120 -0.002016 C 0.000005 -0.000072 -0.824758 C 1.309140 -0.042121 -0.001991 C 2.511593 0.447041 -0.840104 C 2.551691 1.960933 -1.080631 H -3.445223 -0.153568 -0.343563 H 1.661753 2.320158 -1.609718 H 2.614252 2.507734 -0.1…	0	0	0	0	0	4	0	0	0	0	0	0	0	5	0	2	0	6	0
225	3188	CCCC[C@](C)(CC)C(C)C	C11H24	35	-66.4704	C -4.163992 -0.514133 -0.540093 H -4.216230 0.248958 -1.326616 H -5.139862 -0.545633 -0.041979 H -4.009376 -1.483057 -1.030909 C -3.037438 -0.210042 0.452738 C -1.649897 -0.155479 -0.202896 C -0.532022 0.146639 0.806604 C 0.917507 0.279159 0.255367 C 1.355630 -1.041151 -0.482011 C 2.804366 -1.019953 -1.008501 H -3.033489 -0.971181 1.246142 H 3.004897 -0.169377 -1.666588 H 3.533797 -0.992114 -0.19…	0	0	0	0	0	5	0	0	0	0	0	0	0	4	0	1	1	8	0
226	3189	CC[C@@H](CCC(C)C)C(C)C	C11H24	35	-67.0267	C 3.170091 -0.128721 1.347785 H 2.486583 0.313964 2.080144 H 4.187793 0.176052 1.619657 H 3.112090 -1.220478 1.453148 C 2.834344 0.298833 -0.089390 C 1.415521 -0.128987 -0.517666 C 0.276663 0.515963 0.288357 C -1.144370 0.268573 -0.270263 C -1.578483 -1.224373 -0.170822 C -1.885272 -1.685441 1.264219 H -1.048193 -1.499683 1.946609 H -2.766932 -1.176337 1.671338 H -2.091677 -2.762167 1.284315 H 1.…	0	0	0	0	0	5	0	0	0	0	0	0	0	3	0	3	0	5	0
227	3190	CCC[C@@H](C)C(C)(CC)CC	C11H24	35	-65.4297	C -4.144768 -0.747961 -0.287403 H -3.943390 -1.822644 -0.378386 H -4.988617 -0.510761 -0.945544 H -4.464371 -0.559059 0.744938 C -2.906050 0.080799 -0.644197 C -1.695839 -0.240255 0.246937 C -0.436554 0.610222 -0.064012 C 0.917187 -0.081495 0.355087 C 1.131568 -1.332432 -0.549521 C 2.452694 -2.096869 -0.381147 H 3.323491 -1.489544 -0.650584 H 2.597740 -2.449488 0.645975 H 2.459443 -2.979758 -1.03…	0	0	0	0	0	5	0	0	0	0	0	0	0	4	0	1	1	9	0
228	3191	CC[C@H](C)CC(C)(CC)CC	C11H24	35	-66.0326	C 3.924216 0.782513 0.151399 H 3.767628 1.038349 1.207210 H 4.542737 1.571574 -0.291719 H 4.505166 -0.145423 0.117610 C 2.588760 0.655427 -0.590164 C 1.587389 -0.347444 0.024718 C 0.234265 -0.302490 -0.740207 C -1.082657 -0.281485 0.092469 C -1.186654 1.002499 0.962072 C -1.233034 2.345988 0.222099 H -0.334559 2.517984 -0.380703 H -2.098342 2.419074 -0.446174 H -1.305162 3.171032 0.940281 H 1.420…	0	0	0	0	0	5	0	0	0	0	0	0	0	4	0	1	1	8	1
229	3192	CCC(C)(CC)CCC(C)C	C11H24	35	-68.0658	C -3.776115 -0.187246 0.858328 H -3.603627 -0.542224 1.881528 H -4.709587 -0.637244 0.499589 H -3.928575 0.899208 0.904588 C -2.597578 -0.537005 -0.062927 C -1.285072 0.056668 0.491635 C -0.018734 -0.391065 -0.257050 C 1.344805 0.029740 0.360199 C 2.496138 -0.399019 -0.594091 C 2.683351 -1.903871 -0.834210 H 2.909215 -2.444619 0.091171 H 1.796547 -2.365010 -1.282646 H 3.519627 -2.073206 -1.522490…	0	0	0	0	0	5	0	0	0	0	0	0	0	4	0	1	1	7	0
230	3193	CCCC(C)(C)C(CC)CC	C11H24	35	-64.6203	C -3.671771 0.873168 -0.708290 H -4.333415 0.013854 -0.543159 H -4.006952 1.381866 -1.619502 H -3.815158 1.564986 0.131110 C -2.207191 0.432299 -0.820016 C -1.714850 -0.268927 0.455108 C -0.281588 -0.882158 0.445266 C 0.803052 0.170690 0.013138 C 0.842458 1.422867 0.921316 C 1.579715 2.612521 0.292060 H 2.621964 2.372859 0.051602 H 1.091763 2.930278 -0.637961 H 1.590004 3.472462 0.971833 H -2.413…	0	0	0	0	0	5	0	0	0	0	0	0	0	4	0	1	1	8	0
231	3194	CC[C@H](C)[C@H](C)C(CC)CC	C11H24	35	-64.4973	C -4.019288 0.201909 0.062585 H -4.042186 0.752405 1.011418 H -4.883080 -0.472949 0.050797 H -4.163341 0.928483 -0.744601 C -2.710586 -0.584683 -0.084871 C -1.426427 0.281079 -0.052992 C -0.168534 -0.602557 0.234783 C 1.190572 0.072257 -0.127270 C 1.490341 1.320771 0.737298 C 2.524465 2.279045 0.130998 H 3.503285 1.804698 -0.000073 H 2.198817 2.640881 -0.852511 H 2.670447 3.154821 0.773985 H -1.5…	0	0	0	0	0	5	0	0	0	0	0	0	0	3	0	3	0	7	0
232	3195	CCC(CC)[C@@H](C)CC(C)C	C11H24	35	-66.5491	C 3.598576 -1.132757 -0.636778 H 3.372099 -2.177300 -0.390965 H 4.640607 -0.939856 -0.354748 H 3.524234 -1.024379 -1.726947 C 2.639648 -0.167777 0.078216 C 1.179487 -0.505823 -0.291877 C 0.069147 0.318411 0.397844 C -1.335331 -0.044014 -0.177986 C -1.866351 -1.404523 0.332871 C -2.933081 -2.039374 -0.568642 H -3.814782 -1.398306 -0.681916 H -2.534642 -2.232323 -1.572456 H -3.275915 -2.996112 -0.1…	0	0	0	0	0	5	0	0	0	0	0	0	0	3	0	3	0	6	0
233	3196	CCC(CC)CC(C)(C)CC	C11H24	35	-66.6403	C -3.946305 -0.079754 -0.250665 H -4.089621 -1.081858 0.168385 H -4.709762 0.060469 -1.024676 H -4.151298 0.646886 0.543065 C -2.546606 0.101362 -0.852316 C -1.332242 -0.075945 0.103068 C -0.060099 0.224929 -0.744451 C 1.333173 0.000934 -0.093805 C 1.924054 -1.370720 -0.498884 C 3.079008 -1.861480 0.382157 H 3.933010 -1.175038 0.369830 H 2.758403 -1.970220 1.426040 H 3.441594 -2.839205 0.044183 H…	0	0	0	0	0	5	0	0	0	0	0	0	0	4	0	1	1	7	1
234	3197	CCC(CC)C[C@H](C)C(C)C	C11H24	35	-66.4353	C 2.961933 1.115332 -0.887400 H 2.210670 1.710757 -1.417648 H 3.835832 1.026891 -1.543847 H 3.276434 1.682195 -0.002900 C 2.432116 -0.277875 -0.508894 C 1.119608 -0.248746 0.326290 C -0.050580 0.373300 -0.471675 C -1.467017 -0.051351 -0.014943 C -2.530969 0.970167 -0.475644 C -2.530787 2.290542 0.304046 H -2.734336 2.117975 1.368209 H -1.570237 2.813368 0.233253 H -3.302212 2.970820 -0.075005 H 2…	0	0	0	0	0	5	0	0	0	0	0	0	0	3	0	3	0	6	0
235	3198	CCC(CC)CCC(C)(C)C	C11H24	35	-68.4407	C 2.683645 -0.609952 1.363444 H 2.087128 -0.101126 2.128771 H 3.739369 -0.487267 1.635262 H 2.449914 -1.681011 1.412670 C 2.415218 -0.046604 -0.046035 C 0.947253 -0.310016 -0.478833 C -0.160377 0.350918 0.357397 C -1.593336 -0.017989 -0.095534 C -1.975243 -1.442314 0.367256 C -3.166502 -2.060320 -0.374672 H -4.079810 -1.465445 -0.260712 H -2.959189 -2.144340 -1.448737 H -3.383755 -3.066981 0.0008…	0	0	0	0	0	5	0	0	0	0	0	0	0	4	0	1	1	5	0
236	3199	CCC[C@@H](CC)CC(C)(C)C	C11H24	35	-67.9967	C 3.565015 -1.872349 -0.025893 H 3.636915 -2.085459 -1.099670 H 3.770967 -2.804439 0.512865 H 4.362349 -1.160888 0.222616 C 2.186321 -1.309005 0.335573 C 1.869744 0.007506 -0.387229 C 0.476528 0.602539 -0.079329 C -0.648323 -0.213003 -0.775631 C -1.954132 -0.492667 0.021495 C -2.939211 -1.209259 -0.924591 H -3.191401 -0.578929 -1.786402 H -2.512428 -2.144465 -1.308074 H -3.874145 -1.456947 -0.406…	0	0	0	0	0	5	0	0	0	0	0	0	0	4	0	1	1	5	1
237	3200	CCC[C@@H](CC)[C@H](C)C(C)C	C11H24	35	-65.11	C -3.596797 -1.751216 0.002578 H -3.607274 -2.013750 1.067754 H -3.906650 -2.638445 -0.561598 H -4.356905 -0.975424 -0.152724 C -2.210784 -1.264809 -0.434688 C -1.751200 -0.011305 0.324612 C -0.359938 0.527982 -0.085218 C 0.800715 -0.367509 0.456735 C 2.112373 -0.227638 -0.373408 C 3.304569 -0.952822 0.276789 H 3.574890 -0.527655 1.247865 H 3.084135 -2.018560 0.425771 H 4.189234 -0.888143 -0.3676…	0	0	0	0	0	5	0	0	0	0	0	0	0	3	0	3	0	6	0
238	3201	CCC[C@@](C)(CC)CC(C)C	C11H24	35	-66.3788	C 4.036669 -0.569795 -0.880819 H 3.947652 -1.565080 -1.333590 H 5.010426 -0.517328 -0.380312 H 4.041601 0.163616 -1.696789 C 2.888417 -0.301699 0.099761 C 1.514918 -0.364719 -0.585864 C 0.252706 -0.161490 0.301609 C -0.968628 -0.172292 -0.666378 C -2.396293 -0.109669 -0.055518 C -3.299691 0.830428 -0.871176 H -2.898226 1.850623 -0.895267 H -3.388674 0.484052 -1.909335 H -4.311320 0.877513 -0.4498…	0	0	0	0	0	5	0	0	0	0	0	0	0	4	0	1	1	7	1
239	3202	CC[C@H](C)[C@@H](CC)CC(C)C	C11H24	35	-66.1753	C 3.533914 -1.185823 -0.710640 H 4.132639 -0.289719 -0.504147 H 3.896001 -1.616467 -1.651418 H 3.742272 -1.912605 0.082256 C 2.041157 -0.843684 -0.803649 C 1.464406 -0.170065 0.461765 C 0.075072 0.499616 0.226807 C -0.949854 -0.460269 -0.425251 C -2.438270 -0.117195 -0.191609 C -3.328443 -0.907967 -1.162827 H -3.076663 -0.686401 -2.206854 H -3.206501 -1.989086 -1.013765 H -4.389032 -0.671359 -1.0…	0	0	0	0	0	5	0	0	0	0	0	0	0	3	0	3	0	6	0
240	3203	CCC(CC(C)C)CC(C)C	C11H24	35	-67.6524	C 3.274336 -1.420874 -0.873787 H 2.990910 -1.636073 -1.911009 H 3.752080 -2.318213 -0.462460 H 4.029106 -0.623512 -0.894070 C 2.056697 -1.001877 -0.035317 C 1.393258 0.252480 -0.643908 C -0.008397 0.625390 -0.106603 C -1.082193 -0.332447 -0.673781 C -2.436347 -0.372974 0.066689 C -3.483106 -1.116929 -0.777241 H -3.624660 -0.637066 -1.753023 H -3.173935 -2.154836 -0.959002 H -4.455978 -1.145163 -0…	0	0	0	0	0	5	0	0	0	0	0	0	0	3	0	3	0	5	0
241	3204	CCC[C@@H](CC)C(C)(C)CC	C11H24	35	-65.0259	C -3.772623 -0.952073 -0.320062 H -3.674129 -1.947370 0.131187 H -4.452406 -1.040564 -1.175384 H -4.253218 -0.301154 0.421043 C -2.408582 -0.397646 -0.742581 C -1.422478 -0.263084 0.427860 C -0.032748 0.322223 0.028640 C 1.165588 -0.650744 0.327320 C 2.528047 -0.055304 -0.139275 C 2.636816 0.395413 -1.601894 H 2.405478 -0.415200 -2.301692 H 1.965884 1.231251 -1.828973 H 3.657859 0.730637 -1.81828…	0	0	0	0	0	5	0	0	0	0	0	0	0	4	0	1	1	8	0
242	3205	CCC[C@@](C)(CC)[C@@H](C)CC	C11H24	35	-65.4154	C 3.322013 -1.692325 -0.350096 H 4.077869 -0.984576 0.012539 H 3.731487 -2.191869 -1.235698 H 3.184547 -2.453440 0.428072 C 2.002171 -0.979423 -0.668498 C 1.417784 -0.263692 0.559220 C 0.065585 0.484958 0.378123 C -1.075158 -0.509468 -0.066733 C -2.489575 0.126899 -0.076717 C -3.485319 -0.588092 -1.000110 H -3.140446 -0.567067 -2.041411 H -3.630868 -1.637968 -0.722105 H -4.467745 -0.102838 -0.966…	0	0	0	0	0	5	0	0	0	0	0	0	0	4	0	1	1	9	0
243	3206	CC[C@H](C)[C@@H](CC)[C@@H](C)CC	C11H24	35	-63.8484	C -3.817097 -0.574422 -0.587132 H -3.672922 -1.446925 -1.236909 H -4.622588 0.030507 -1.019328 H -4.168922 -0.938792 0.384211 C -2.525803 0.244900 -0.464868 C -1.300330 -0.557116 0.028851 C 0.018205 0.253760 -0.157714 C 1.315091 -0.579845 0.084882 C 2.563248 0.205029 -0.385857 C 3.904111 -0.357491 0.103678 H 3.937877 -0.396930 1.199751 H 4.095442 -1.369245 -0.269781 H 4.735327 0.274549 -0.229918 …	0	0	0	0	0	5	0	0	0	0	0	0	0	3	0	3	0	7	0
244	3207	CCCCC(C)(C)C(C)(C)C	C11H24	35	-66.8598	C -3.170521 0.477628 -0.212702 H -3.228938 0.842842 -1.243046 H -3.227904 1.343703 0.455763 H -4.065445 -0.130195 -0.032587 C -1.903276 -0.375105 0.031879 C -0.578959 0.513943 -0.041953 C 0.678256 -0.406164 -0.122754 H 0.687518 -0.899119 -1.103626 H 0.587698 -1.212106 0.617690 C 2.050646 0.257020 0.084445 H 2.175023 1.110853 -0.595914 H 2.125589 0.663422 1.101594 C 3.211693 -0.722698 -0.140294 H …	0	0	0	0	0	6	0	0	0	0	0	0	0	3	0	0	2	8	0
245	3208	CCC[C@H](C)[C@H](C)C(C)(C)C	C11H24	35	-66.2538	C -1.218875 -1.827599 0.036519 H -0.941591 -1.995343 1.083725 H -0.327175 -1.984020 -0.580192 H -1.944063 -2.604389 -0.236615 C -1.832736 -0.429939 -0.180864 C -0.882981 0.742602 0.266579 C 0.527930 0.748569 -0.415910 H 0.430457 0.255538 -1.392056 C 1.627081 -0.015731 0.362332 H 1.972752 0.597398 1.206948 H 1.212823 -0.928661 0.805365 C 2.839268 -0.413657 -0.493897 H 3.286106 0.476404 -0.955957 H…	0	0	0	0	0	6	0	0	0	0	0	0	0	2	0	2	1	7	1
246	3209	CC[C@@H](C)C[C@H](C)C(C)(C)C	C11H24	35	-68.4372	C 2.109209 1.745971 0.167679 H 1.318789 2.137784 0.816215 H 1.951298 2.157115 -0.837392 H 3.061740 2.140854 0.541569 C 2.140463 0.202314 0.136676 C 0.786005 -0.343290 -0.443920 C -0.431922 -0.078898 0.477600 H -0.466041 -0.870634 1.239366 C -1.803746 -0.016807 -0.234573 H -1.869987 -0.859399 -0.940299 C -2.941333 -0.194007 0.793226 H -2.897244 0.631498 1.519698 H -2.749431 -1.111492 1.366775 C -4…	0	0	0	0	0	6	0	0	0	0	0	0	0	2	0	2	1	7	0
247	3210	CCCC(C)(C)CC(C)(C)C	C11H24	35	-66.1088	C -2.419379 -1.915819 0.218534 H -2.072589 -2.287187 1.190727 H -2.024312 -2.585884 -0.555259 H -3.513332 -1.994155 0.200848 C -1.966969 -0.455854 -0.019517 C -0.404143 -0.492313 -0.061197 C 0.519922 0.766845 -0.004373 C 1.943963 0.329143 -0.468236 H 2.588508 1.221001 -0.452673 C 2.650390 -0.785186 0.319108 H 2.722487 -0.510212 1.379380 C 4.057859 -1.068556 -0.220053 H 4.693307 -0.176236 -0.16026…	0	0	0	0	0	6	0	0	0	0	0	0	0	3	0	0	2	6	2
248	3211	CC(C)(C)CCCC(C)(C)C	C11H24	35	-72.3199	C -3.751451 1.079167 0.000065 H -3.685249 1.722853 -0.885983 H -3.685207 1.722894 0.886080 H -4.743925 0.611721 0.000100 C -2.636428 0.014030 0.000063 C -1.271636 0.753370 0.000009 C 0.000000 -0.110462 0.000003 C 1.271636 0.753370 -0.000068 C 2.636428 0.014030 -0.000064 C 3.751451 1.079166 -0.000144 H 3.685247 1.722919 0.885856 H 4.743925 0.611720 -0.000141 H 3.685209 1.722827 -0.886207 C -2.7889…	0	0	0	0	0	6	0	0	0	0	0	0	0	3	0	0	2	4	0
249	3212	CCC[C@H](C)C(C)(C)C(C)C	C11H24	35	-65.3454	C -3.425350 -0.405668 0.143345 H -3.461622 -1.097518 0.989933 H -3.584749 -0.985115 -0.773454 H -4.279321 0.274715 0.244591 C -2.118028 0.410200 0.097460 C -0.807215 -0.462753 0.052913 C 0.470331 0.464269 0.093780 C 1.809656 -0.315564 0.168889 C 3.005375 0.445419 -0.425558 C 4.325876 -0.320502 -0.291565 H 4.272051 -1.295414 -0.791986 H 5.158745 0.236182 -0.736447 H 4.572818 -0.504022 0.761471 H 0…	0	0	0	0	0	6	0	0	0	0	0	0	0	2	0	2	1	9	0
250	3213	CCCC(C)(C)[C@H](C)C(C)C	C11H24	35	-65.7282	C -2.701106 -1.333078 1.134709 H -2.144227 -1.541323 2.055951 H -2.685850 -2.244899 0.523638 H -3.745391 -1.141684 1.410134 C -2.099910 -0.137790 0.373312 C -0.606026 -0.426435 -0.006939 C 0.354709 0.817790 0.084463 C 1.801356 0.443329 -0.356920 C 2.517361 -0.680376 0.408501 C 3.938175 -0.921942 -0.115752 H 4.553034 -0.017764 -0.026397 H 4.439457 -1.722050 0.441026 H 3.927534 -1.209094 -1.174614 …	0	0	0	0	0	6	0	0	0	0	0	0	0	2	0	2	1	8	1
251	3214	CCC(C)(C)C[C@H](C)C(C)C	C11H24	35	-67.476	C 3.461381 -0.023526 1.109499 H 3.092277 0.402789 2.050536 H 4.001701 0.766317 0.574101 H 4.191004 -0.802901 1.360207 C 2.313404 -0.603006 0.267978 C 1.163452 0.422949 0.045028 C -0.108395 -0.261562 -0.530919 C -1.476728 0.062984 0.139664 C -2.562267 -0.656623 -0.710178 C -4.015389 -0.550748 -0.229353 H -4.363048 0.487456 -0.189144 H -4.679190 -1.088752 -0.916039 H -4.153600 -0.988266 0.765400 H …	0	0	0	0	0	6	0	0	0	0	0	0	0	2	0	2	1	7	1
252	3215	CC(C)[C@@H](C)C[C@@H](C)C(C)C	C11H24	35	-67.9702	C 3.313947 -1.375040 -0.301389 H 2.775272 -2.305834 -0.517183 H 3.667167 -1.426325 0.735616 H 4.201445 -1.346148 -0.944888 C 2.425036 -0.143896 -0.542820 C 1.079124 -0.233735 0.236938 C 0.047722 0.772026 -0.320824 C -1.394088 0.703765 0.237063 C -2.062137 -0.693039 0.085965 C -2.250393 -1.142133 -1.372634 H -1.305599 -1.154355 -1.927243 H -2.665717 -2.156318 -1.409723 H -2.945284 -0.486366 -1.910…	0	0	0	0	0	6	0	0	0	0	0	0	0	1	0	4	0	6	0
253	3216	CC(C)[C@@H](C)CCC(C)(C)C	C11H24	35	-69.9245	C -3.875950 0.164608 -0.956345 H -3.655010 0.692826 -1.892011 H -4.315316 0.888402 -0.259560 H -4.645422 -0.586656 -1.170952 C -2.616230 -0.498302 -0.375622 C -1.431345 0.502226 -0.243378 C -0.097484 -0.233453 0.024278 C 1.152428 0.627326 -0.221808 C 2.531853 -0.068677 -0.061592 C 3.625395 0.982802 -0.338326 H 3.557350 1.821120 0.366246 H 4.626898 0.545598 -0.241698 H 3.535584 1.391157 -1.352738 …	0	0	0	0	0	6	0	0	0	0	0	0	0	2	0	2	1	5	0
254	3217	CC[C@@H](C)C(C)(C)CC(C)C	C11H24	35	-65.5035	C 3.344757 -0.335760 -1.246158 H 3.156289 0.387286 -2.048634 H 3.211534 -1.341195 -1.667045 H 4.395091 -0.239525 -0.945158 C 2.398094 -0.110327 -0.055280 C 0.918451 -0.271283 -0.498434 C -0.150262 0.683756 0.119678 C -1.570206 0.183144 -0.345427 C -2.015688 -1.136813 0.332863 C -3.049417 -1.932263 -0.475274 H -2.643662 -2.225828 -1.451372 H -3.339642 -2.848063 0.052733 H -3.964229 -1.357248 -0.65…	0	0	0	0	0	6	0	0	0	0	0	0	0	2	0	2	1	8	1
255	3218	CC(C)CC(C)(C)CC(C)C	C11H24	35	-66.4955	C -2.930860 -1.613003 -0.817999 H -2.217929 -2.154759 -1.450901 H -3.636237 -1.094783 -1.481022 H -3.500238 -2.352680 -0.241980 C -2.213067 -0.615086 0.105698 C -1.418556 0.432031 -0.722664 C -0.000507 0.843326 -0.225796 C 0.959301 -0.369279 -0.406064 C 2.417605 -0.234748 0.110761 C 3.399088 -0.919869 -0.854668 H 3.355108 -0.470890 -1.854039 H 4.432489 -0.842303 -0.495342 H 3.163927 -1.987350 -0.…	0	0	0	0	0	6	0	0	0	0	0	0	0	2	0	2	1	6	2
256	3219	CC(C)C[C@H](C)[C@@H](C)C(C)C	C11H24	35	-67.479	C 2.757697 1.576090 -0.601175 H 1.932172 2.223716 -0.286396 H 2.705307 1.477036 -1.693650 H 3.692843 2.095646 -0.360176 C 2.707268 0.195731 0.072535 C 1.393810 -0.560234 -0.228937 C 0.112738 0.022284 0.415266 C -1.170709 -0.433862 -0.345509 C -2.466728 0.295601 0.116701 C -3.677173 -0.079880 -0.758346 H -3.924179 -1.143987 -0.700126 H -4.566601 0.478974 -0.444296 H -3.489818 0.164270 -1.812738 H …	0	0	0	0	0	6	0	0	0	0	0	0	0	1	0	4	0	6	0
257	3220	CC(C)C[C@H](C)CC(C)(C)C	C11H24	35	-69.6087	C -2.861095 -0.308114 1.475872 H -2.137291 0.268200 2.062597 H -2.634473 -1.373044 1.620041 H -3.854101 -0.120592 1.901686 C -2.824538 0.061529 -0.014930 C -1.455768 -0.230966 -0.662717 C -0.220826 0.490325 -0.076560 C 1.062282 0.039085 -0.829599 C 2.335100 -0.255207 0.012960 C 2.744267 0.951486 0.878975 H 1.977281 1.201165 1.620713 H 3.670940 0.736238 1.425589 H 2.921895 1.842199 0.263732 H -3.0…	0	0	0	0	0	6	0	0	0	0	0	0	0	2	0	2	1	5	1
258	3221	CC(C)CCC(C)(C)C(C)C	C11H24	35	-68.9825	C 3.100887 0.944816 0.978669 H 2.494630 0.960508 1.890550 H 2.939294 1.895287 0.452329 H 4.153725 0.911184 1.283498 C 2.754228 -0.246210 0.071901 C 1.285002 -0.226358 -0.401693 C 0.251999 -0.359355 0.728669 C -1.238154 -0.551196 0.314935 C -1.722162 0.612770 -0.619993 C -3.180258 0.467474 -1.095581 H -3.890448 0.545285 -0.263852 H -3.423769 1.268659 -1.803474 H -3.362665 -0.483329 -1.605620 H 2.9…	0	0	0	0	0	6	0	0	0	0	0	0	0	2	0	2	1	7	0
259	3222	CC(C)CC[C@@H](C)C(C)(C)C	C11H24	35	-68.9394	C -4.086969 -0.139007 -0.981233 H -3.865864 -0.446218 -2.010481 H -4.311100 0.935843 -0.995934 H -4.996424 -0.662232 -0.662386 C -2.910391 -0.440993 -0.040723 C -1.628864 0.259040 -0.538023 C -0.342833 -0.140462 0.204316 C 0.943408 0.500098 -0.374572 C 2.251106 -0.299153 -0.026710 C 2.232851 -1.667011 -0.743761 H 2.153708 -1.540930 -1.830956 H 3.159099 -2.218084 -0.540349 H 1.401379 -2.301411 -0.…	0	0	0	0	0	6	0	0	0	0	0	0	0	2	0	2	1	6	0
260	3223	CCC(C)(C)[C@H](C)CC(C)C	C11H24	35	-67.9454	C -2.843645 -1.659774 0.204001 H -2.076471 -2.164193 0.801928 H -2.778107 -2.050871 -0.817160 H -3.818571 -1.960015 0.605395 C -2.702167 -0.132266 0.244484 C -1.383986 0.473546 -0.319924 C -0.125201 -0.092886 0.432978 C 1.206696 0.565064 -0.011774 C 2.479362 -0.282072 0.216264 C 3.734465 0.594485 0.083602 H 3.726131 1.417435 0.808264 H 4.648114 0.010626 0.248054 H 3.799776 1.035805 -0.919847 H -2…	0	0	0	0	0	6	0	0	0	0	0	0	0	2	0	2	1	8	0
261	3224	CCC(C)(C)CC(C)(C)CC	C11H24	35	-64.9133	C 2.632639 1.924134 -0.285737 H 1.725767 2.533050 -0.364257 H 2.947025 1.659899 -1.301548 H 3.415851 2.561025 0.141708 C 2.425250 0.683744 0.593363 C 1.380448 -0.372943 0.116021 C 0.000000 0.352312 0.000000 C -1.380446 -0.372944 -0.116021 C -2.425249 0.683742 -0.593366 C -2.632648 1.924128 0.285738 H -1.725779 2.533048 0.364265 H -3.415861 2.561016 -0.141710 H -2.947038 1.659888 1.301546 H 2.1431…	0	0	0	0	0	6	0	0	0	0	0	0	0	3	0	0	2	8	2
262	3225	CCC(C)(C)CCC(C)(C)C	C11H24	35	-71.5165	C -2.193037 2.128607 -0.028469 H -1.169339 2.388056 0.264249 H -2.805733 2.119202 0.879743 H -2.565768 2.939994 -0.664338 C -2.255345 0.792507 -0.779671 C -1.789340 -0.469517 -0.004021 C -0.334025 -0.335323 0.528416 C 0.754908 -0.046685 -0.517368 C 2.217281 0.035166 0.003960 C 2.372746 1.158642 1.047743 H 1.792748 0.958378 1.955390 H 3.422667 1.266611 1.346898 H 2.042136 2.123879 0.643227 H -1.66…	0	0	0	0	0	6	0	0	0	0	0	0	0	3	0	0	2	6	0
263	3226	CC[C@@H](C)C(C)(C)[C@H](C)CC	C11H24	35	-64.0892	C -3.838175 -0.321718 0.432450 H -3.705149 -0.577814 1.490927 H -4.016740 -1.255126 -0.113039 H -4.748544 0.283386 0.349659 C -2.621569 0.444219 -0.105756 C -1.295815 -0.357892 -0.025482 C 0.000000 0.543317 0.000001 C 1.295815 -0.357892 0.025484 C 2.621569 0.444219 0.105754 C 3.838174 -0.321718 -0.432456 H 3.705145 -0.577814 -1.490932 H 4.748543 0.283386 -0.349668 H 4.016741 -1.255127 0.113033 H …	0	0	0	0	0	6	0	0	0	0	0	0	0	2	0	2	1	10	0
264	3227	CC[C@@H](C)[C@H](C)C(C)(C)CC	C11H24	35	-65.2508	C -3.720597 -0.798018 -0.617588 H -3.662772 -0.443328 -1.654737 H -4.287839 -0.056981 -0.044416 H -4.303272 -1.726500 -0.618085 C -2.322103 -1.035175 -0.035147 C -1.361030 0.174155 -0.114041 C 0.062059 -0.238924 0.402711 C 1.265157 0.374469 -0.406986 C 2.630774 -0.057170 0.206853 C 2.915954 -1.562134 0.302731 H 2.895263 -2.046419 -0.679614 H 3.912526 -1.730657 0.727300 H 2.196969 -2.083652 0.9440…	0	0	0	0	0	6	0	0	0	0	0	0	0	2	0	2	1	9	1
265	3228	CC[C@@H](C)[C@H](C)[C@@H](C)C(C)C	C11H24	35	-65.9781	C 3.571424 -1.257092 -0.432019 H 3.083577 -2.163055 -0.812980 H 3.864219 -1.450478 0.606090 H 4.492086 -1.109044 -1.008258 C 2.647377 -0.038430 -0.552581 C 1.303506 -0.188007 0.199287 C 0.230251 0.811859 -0.331576 C -1.211640 0.565283 0.217959 C -1.685377 -0.917084 0.127149 C -1.815195 -1.441596 -1.312584 H -0.876580 -1.353465 -1.871011 H -2.098896 -2.500889 -1.310990 H -2.587081 -0.898455 -1.870…	0	0	0	0	0	6	0	0	0	0	0	0	0	1	0	4	0	7	0
266	3229	CC[C@@H](C)[C@H](C)CC(C)(C)C	C11H24	35	-68.2791	C 3.925113 -1.093764 -0.394302 H 3.596077 -2.125540 -0.217207 H 4.445273 -0.752206 0.507374 H 4.660432 -1.115397 -1.206923 C 2.739520 -0.188972 -0.753144 C 1.607631 -0.170848 0.296311 C 0.304780 0.474242 -0.264001 C -0.913681 0.207331 0.664373 C -2.229930 -0.286407 -0.001183 C -3.306958 -0.382230 1.098525 H -3.499165 0.598072 1.552044 H -4.255369 -0.753470 0.690688 H -2.997578 -1.065957 1.898911 …	0	0	0	0	0	6	0	0	0	0	0	0	0	2	0	2	1	6	1
267	3230	CC[C@@H](C)CC(C)(C)C(C)C	C11H24	35	-65.7035	C 3.785386 -0.904418 0.004168 H 3.751751 -1.005884 1.096451 H 4.439544 -0.057245 -0.229260 H 4.263158 -1.805952 -0.396548 C 2.377642 -0.726849 -0.576877 C 1.591724 0.482517 -0.022748 C 0.098043 0.440036 -0.458770 C -0.938892 -0.101551 0.567588 C -2.368949 -0.201811 -0.084144 C -2.504179 -1.290311 -1.165792 H -2.273003 -2.290221 -0.787014 H -3.533795 -1.315204 -1.542027 H -1.852193 -1.097228 -2.02…	0	0	0	0	0	6	0	0	0	0	0	0	0	2	0	2	1	8	1
268	3231	CCCC(C)(C)C(C)(C)CC	C11H24	35	-64.8254	C -3.746147 -1.247192 -0.276064 H -3.422445 -2.266094 -0.029163 H -3.812919 -1.178963 -1.368960 H -4.755833 -1.112028 0.128649 C -2.773877 -0.203947 0.287995 C -1.347057 -0.395382 -0.254787 C -0.279523 0.669674 0.147270 C 1.188044 0.149853 -0.232628 C 1.644391 -0.953504 0.772315 C 2.902657 -1.752355 0.399411 H 3.773736 -1.108825 0.232391 H 3.160719 -2.440163 1.213144 H 2.756847 -2.355859 -0.50253…	0	0	0	0	0	6	0	0	0	0	0	0	0	3	0	0	2	10	0
269	3232	CCCC(CC)(CC)C(C)C	C11H24	35	-62.736	C -2.937065 -0.413422 -0.840672 H -3.278509 0.572657 -0.507649 H -3.177648 -1.131123 -0.048769 H -3.538468 -0.682454 -1.717027 C -1.446417 -0.430629 -1.207543 C -0.410874 -0.085716 -0.086938 C 0.984513 -0.359273 -0.727329 C 2.258848 -0.156094 0.108104 C 3.510935 -0.637405 -0.636341 H -1.288250 0.252331 -2.051872 H -1.204259 -1.426891 -1.598955 H 3.638191 -0.102740 -1.585928 H 3.448299 -1.708034 -…	0	0	0	0	0	5	0	0	0	0	0	0	0	4	0	1	1	10	0
270	3233	CCC(CC)[C@H](CC)C(C)C	C11H24	35	-63.8384	C -1.066254 2.694114 -0.726207 H -1.732371 2.415458 -1.551826 H -0.071575 2.866604 -1.152966 H -1.424084 3.647050 -0.317817 C -1.040606 1.600897 0.350173 C -0.537013 0.213350 -0.155301 C 0.872828 -0.131818 0.423593 C 1.363886 -1.562781 0.089972 C 1.563750 -1.876217 -1.399517 H -2.053381 1.505122 0.757670 H -0.425786 1.937618 1.194854 H 2.312504 -1.220798 -1.858638 H 0.635382 -1.765479 -1.971498 H…	0	0	0	0	0	5	0	0	0	0	0	0	0	3	0	3	0	7	0
271	3234	CCC[C@H](C(C)C)C(C)(C)C	C11H24	35	-64.19	C 0.546607 2.396262 -1.093260 H -0.002223 2.271881 -2.034431 H 1.588546 2.113309 -1.279007 H 0.535213 3.463795 -0.839857 C -0.088630 1.559780 0.033250 C -0.179874 0.035007 -0.344235 C 0.998903 -0.812140 0.196394 C 2.373538 -0.514998 -0.427281 C 3.456735 -1.485092 0.058650 H -1.115425 1.930104 0.131283 H 3.199082 -2.523051 -0.186249 H 3.583586 -1.425342 1.146822 H 2.689999 0.510663 -0.205465 H 2.2…	0	0	0	0	0	6	0	0	0	0	0	0	0	2	0	2	1	7	1
272	3235	CC[C@@H](C)[C@H](CC)C(C)(C)C	C11H24	35	-63.566	C 0.645880 2.741771 -0.461468 H 0.677457 2.675632 -1.556244 H 1.650329 2.518831 -0.089506 H 0.425727 3.783893 -0.200381 C -0.428354 1.807377 0.115671 C -0.310139 0.321859 -0.308222 C 0.969799 -0.400908 0.255636 C 2.118812 -0.408263 -0.781206 C 3.324948 -1.275728 -0.400179 H -1.394921 2.193154 -0.220909 H 3.017747 -2.305004 -0.173794 H 3.854147 -0.887232 0.476664 H 2.458382 0.617830 -0.973165 H 1.…	0	0	0	0	0	6	0	0	0	0	0	0	0	2	0	2	1	8	1
273	3236	CC[C@@H](CC(C)C)C(C)(C)C	C11H24	35	-67.5743	C -0.001155 2.961718 -0.078236 H -0.000902 3.091171 1.011223 H -1.042303 2.829437 -0.393236 H 0.360862 3.895787 -0.523524 C 0.883628 1.779181 -0.491764 C 0.417491 0.415700 0.078693 C -0.862194 -0.064760 -0.667331 C -2.018183 -0.602970 0.207248 C -3.054008 -1.330086 -0.663992 H 1.908444 1.996891 -0.171281 H -2.604400 -2.173661 -1.201802 H -3.483206 -0.650383 -1.412200 H -1.607072 -1.334079 0.91609…	0	0	0	0	0	6	0	0	0	0	0	0	0	2	0	2	1	7	0
274	3237	CCCC(C)(C(C)C)C(C)C	C11H24	35	-63.7591	C -2.576608 -0.884348 -0.601215 H -2.886269 0.127318 -0.880366 H -3.089473 -1.142849 0.332374 H -2.951205 -1.566329 -1.373886 C -1.047507 -1.030874 -0.467020 C -0.386167 0.049639 0.467295 C 1.133937 -0.244154 0.660505 C 2.056392 -0.326502 -0.566934 C 3.464968 -0.803024 -0.189855 H 3.439285 -1.806734 0.252554 H 3.927386 -0.131993 0.544781 H 1.637907 -1.006018 -1.320258 H 1.219997 -1.191702 1.20885…	0	0	0	0	0	6	0	0	0	0	0	0	0	2	0	2	1	10	0
275	3238	CC[C@@H](C)C(C(C)C)C(C)C	C11H24	35	-62.8954	C -2.438601 1.487480 -0.049837 H -3.022924 0.667179 0.373907 H -2.661219 1.533777 -1.124055 H -2.804519 2.417130 0.402581 C -0.924040 1.332576 0.187467 C -0.363397 0.024423 -0.456403 C 1.196858 0.002085 -0.568395 C 1.920110 -0.079350 0.793255 C 3.433361 0.167021 0.723802 H 3.656142 1.135809 0.258695 H 3.950716 -0.605080 0.144130 H 1.481577 0.658081 1.478330 H 1.488382 0.955225 -1.027330 H 3.87454…	0	0	0	0	0	6	0	0	0	0	0	0	0	1	0	4	0	7	0
276	3239	CC(C)CC(C(C)C)C(C)C	C11H24	35	-67.1259	C 0.718058 -2.498332 -0.698932 H 0.418647 -2.316658 -1.738110 H -0.176616 -2.803391 -0.143907 H 1.408045 -3.350848 -0.695825 C 1.394357 -1.260103 -0.086877 C 0.508997 0.019393 -0.201873 C -0.806888 -0.093168 0.623423 C -2.112260 0.307360 -0.103519 C -3.256859 0.475032 0.907583 H -3.023227 1.243840 1.654142 H -3.444921 -0.463587 1.445750 H -1.953980 1.277885 -0.593165 H -0.710780 0.516971 1.532176…	0	0	0	0	0	6	0	0	0	0	0	0	0	1	0	4	0	6	0
277	3240	CC[C@@H](C)[C@](C)(CC)C(C)C	C11H24	35	-63.0668	C 1.543349 1.602460 -1.517941 H 0.606158 1.657386 -2.082625 H 2.138586 0.789097 -1.943964 H 2.090967 2.534086 -1.704684 C 1.310951 1.428227 -0.010030 C 0.410335 0.254694 0.484533 C -1.033027 0.362954 -0.139095 C -2.025766 -0.691865 0.415655 C -3.221184 -0.969646 -0.506127 H -2.889159 -1.347158 -1.481582 H -3.823000 -0.072441 -0.688359 H -1.511129 -1.641809 0.597249 H -0.927436 0.165696 -1.213705 …	0	0	0	0	0	6	0	0	0	0	0	0	0	2	0	2	1	11	0
278	3241	CC[C@H](C(C)C)C(C)(C)CC	C11H24	35	-63.1414	C 1.519782 2.388954 -0.252563 H 2.528769 1.977790 -0.152488 H 1.218781 2.766099 0.732979 H 1.584448 3.249507 -0.929213 C 0.506354 1.363548 -0.783698 C 0.223425 0.166868 0.158770 C -1.117416 -0.594929 -0.185985 C -2.324742 0.380447 -0.337516 C -2.612581 1.331499 0.831786 H -1.793793 2.038631 1.004230 H -2.785331 0.790145 1.768391 H -2.208811 0.969330 -1.255781 H -3.513607 1.921001 0.625821 C 1.453…	0	0	0	0	0	6	0	0	0	0	0	0	0	2	0	2	1	9	1
279	3242	CC[C@@H](CC(C)(C)C)C(C)C	C11H24	35	-68.5806	C -0.841476 2.839521 -0.104221 H -0.759074 2.896956 -1.196693 H 0.167603 2.954402 0.307749 H -1.432761 3.699931 0.230190 C -1.494035 1.522016 0.330604 C -0.711490 0.257344 -0.094931 C 0.586147 0.081662 0.744384 C 1.901142 -0.273047 -0.008203 C 2.334484 0.884525 -0.929325 H 2.485609 1.809035 -0.358470 H 1.592013 1.091019 -1.708271 H 3.279888 0.645692 -1.432017 C -1.597845 -1.026659 -0.069737 H -0.…	0	0	0	0	0	6	0	0	0	0	0	0	0	2	0	2	1	6	1
280	3243	CC[C@@H](C)C(CC)(CC)CC	C11H24	35	-61.6681	C 3.021885 -0.067862 0.550194 H 3.291758 0.890908 0.094857 H 3.277010 -0.857546 -0.165086 H 3.666548 -0.204672 1.426329 C 1.546339 -0.124909 0.973263 C 0.483917 0.035746 -0.152068 C -0.958671 0.115466 0.493552 C -2.103536 -0.018702 -0.541388 C -3.444042 0.567895 -0.077473 H -3.346057 1.634408 0.161111 H -3.834062 0.064453 0.813834 H -4.202914 0.472812 -0.862873 C 0.753894 1.356267 -0.945241 H -0.…	0	0	0	0	0	5	0	0	0	0	0	0	0	4	0	1	1	11	0
281	3244	CCC(CC)(CC)CC(C)C	C11H24	35	-65.504	C 3.199191 -0.034070 -0.535504 H 3.446248 -0.882319 0.112447 H 3.414540 0.883201 0.023896 H 3.888035 -0.065082 -1.387723 C 1.746797 -0.085296 -1.027939 C 0.629435 -0.023980 0.054155 C -0.724841 -0.103992 -0.716851 C -2.056865 -0.098854 0.084011 C -3.077970 -1.045351 -0.571262 H -2.704937 -2.075834 -0.607713 H -3.293840 -0.734151 -1.601965 H -4.027008 -1.051104 -0.021472 C 0.772857 -1.205905 1.056…	0	0	0	0	0	5	0	0	0	0	0	0	0	4	0	1	1	9	1
282	3245	CCC(CC)C(C)(CC)CC	C11H24	35	-63.0824	C 1.308651 1.962416 -1.339741 H 0.276244 2.094003 -1.681865 H 1.805658 1.285825 -2.044044 H 1.804409 2.936950 -1.419212 C 1.381746 1.447116 0.103624 C 0.764487 0.046696 0.391709 C -0.756938 -0.009374 -0.023182 C -1.434700 -1.384782 0.271215 C -2.067734 -2.045413 -0.960568 H -1.310706 -2.256684 -1.725670 H -2.826194 -1.401052 -1.419640 H -2.550592 -2.994905 -0.699336 C 1.523596 -1.041724 -0.427433…	0	0	0	0	0	5	0	0	0	0	0	0	0	4	0	1	1	10	0
283	3246	CCC[C@@](C)(CC)C(C)(C)C	C11H24	35	-63.4692	C -1.390201 -0.204085 -1.803099 H -0.650010 -0.840343 -2.298755 H -1.166966 0.833085 -2.063300 H -2.366807 -0.447795 -2.239373 C -1.435504 -0.451436 -0.274685 C -0.104850 0.030000 0.476767 C 1.148441 -0.391613 -0.347154 C 2.528462 -0.175295 0.297664 C 3.668237 -0.613282 -0.630430 H 3.655869 -0.047736 -1.570489 H 3.585975 -1.677212 -0.885535 H 4.646889 -0.458318 -0.161657 H 1.145606 0.135424 -1.30…	0	0	0	0	0	6	0	0	0	0	0	0	0	3	0	0	2	10	0
284	3247	CC[C@](C)(CC(C)C)C(C)C	C11H24	35	-65.0575	C -1.859776 -1.813548 -1.055433 H -2.091899 -2.478955 -0.215638 H -0.946276 -2.182536 -1.531059 H -2.670761 -1.920309 -1.785507 C -1.756510 -0.343524 -0.601265 C -0.499362 -0.032177 0.297741 C 0.777186 -0.194499 -0.585504 C 2.169822 -0.012434 0.081489 C 3.129586 0.728293 -0.865129 H 2.750205 1.724583 -1.121942 H 3.261781 0.171621 -1.802365 H 4.120481 0.852866 -0.411594 H 0.689841 0.517527 -1.4163…	0	0	0	0	0	6	0	0	0	0	0	0	0	2	0	2	1	9	1
285	3248	CC[C@@H](C(C)C)[C@@H](C)C(C)C	C11H24	35	-64.6423	C -1.674825 -2.083982 0.807143 H -1.448077 -1.828645 1.850988 H -0.884515 -2.749482 0.446614 H -2.609319 -2.657627 0.805566 C -1.823115 -0.816822 -0.052392 C -0.586461 0.131190 0.019648 C 0.775553 -0.603712 -0.197177 C 2.009804 0.275887 0.168565 C 3.341404 -0.439096 -0.127142 H 3.486213 -0.632133 -1.194172 H 3.398482 -1.401303 0.399663 H 4.186543 0.171356 0.212136 H 1.986277 1.184581 -0.451330 C …	0	0	0	0	0	6	0	0	0	0	0	0	0	1	0	4	0	7	0
286	3249	CCC(C)(C)C(C)(CC)CC	C11H24	35	-61.3921	C 3.145657 -0.742914 0.290058 H 3.544706 0.211341 -0.071212 H 3.276278 -1.482342 -0.506855 H 3.774445 -1.057592 1.131217 C 1.683607 -0.629950 0.749570 C 0.640782 -0.171350 -0.314629 C -0.846726 -0.306608 0.282774 C -1.849305 0.509371 -0.589941 C -3.346425 0.282177 -0.328079 H -3.626867 0.488219 0.710857 H -3.656799 -0.741734 -0.560474 H -3.938784 0.953136 -0.961170 C 0.992949 1.268710 -0.814011 H…	0	0	0	0	0	6	0	0	0	0	0	0	0	3	0	0	2	12	0
287	3250	CCC(C)(CC)[C@@H](C)C(C)C	C11H24	35	-64.3022	C -2.594128 -1.793488 -0.425566 H -3.407207 -1.060045 -0.451730 H -2.630048 -2.295799 0.547399 H -2.814433 -2.549122 -1.188647 C -1.223087 -1.157940 -0.699010 C -0.713999 -0.100505 0.327077 C 0.645122 0.498843 -0.210791 C 1.832581 -0.523194 -0.309310 C 2.753329 -0.585861 0.924835 H 2.205122 -0.767905 1.853433 H 3.324697 0.340634 1.052012 H 3.479523 -1.399047 0.805209 C -1.778757 1.023442 0.498153…	0	0	0	0	0	6	0	0	0	0	0	0	0	2	0	2	1	10	1
288	3251	CCC(C)(CC)CC(C)(C)C	C11H24	35	-65.0069	C 3.393630 -0.750561 0.447857 H 3.770781 0.227797 0.131068 H 3.524035 -1.444462 -0.389908 H 4.040826 -1.099927 1.260807 C 1.938468 -0.685335 0.930142 C 0.846922 -0.289246 -0.115526 C -0.467325 -0.141392 0.721221 C -1.913670 -0.051814 0.130998 C -2.819113 0.405757 1.298934 H -2.546530 1.410494 1.644773 H -2.738307 -0.275342 2.155263 H -3.871626 0.431597 0.991070 C 1.254371 1.021005 -0.849852 H 2.1…	0	0	0	0	0	6	0	0	0	0	0	0	0	3	0	0	2	8	2
289	3252	CCC(CC)C(C)(C)C(C)C	C11H24	35	-63.322	C -2.392846 2.070914 0.166376 H -3.285189 1.439183 0.242247 H -2.260422 2.328413 -0.892120 H -2.602186 2.999831 0.709524 C -1.142249 1.378695 0.725465 C -0.789843 0.057236 0.000716 C 0.671693 -0.460728 0.296917 C 1.745979 0.628611 -0.091558 C 3.204098 0.146782 0.053087 H 3.470751 -0.587282 -0.715894 H 3.408828 -0.300697 1.030424 H 3.886224 0.997179 -0.063932 C -1.900884 -1.008985 0.261655 H -1.49…	0	0	0	0	0	6	0	0	0	0	0	0	0	2	0	2	1	10	0
290	3253	CCC(CC)[C@@H](C)C(C)(C)C	C11H24	35	-65.883	C -1.847119 2.443180 -0.347853 H -1.968197 2.321131 -1.431387 H -0.863110 2.894313 -0.175856 H -2.600709 3.163444 -0.008561 C -2.004197 1.101052 0.376658 C -0.970084 0.020058 -0.025545 C 0.428274 0.326694 0.611978 C 1.666085 -0.022283 -0.295968 C 1.661881 0.880893 -1.549344 H 1.689926 1.942071 -1.271853 H 0.779418 0.724003 -2.178323 H 2.543032 0.677098 -2.169955 C -1.522944 -1.392222 0.294456 H -…	0	0	0	0	0	6	0	0	0	0	0	0	0	2	0	2	1	8	1
291	3254	CC[C@@H](C)C(C)(C)C(C)(C)C	C11H24	35	-61.113	C 2.750013 -0.804190 -0.271900 H 2.667165 -1.473647 -1.133022 H 2.835439 -1.420745 0.629879 H 3.693729 -0.256136 -0.378595 C 1.576444 0.208309 -0.188341 C 0.201905 -0.532233 0.190207 C -1.096050 0.312051 -0.153576 C -2.419963 -0.381427 0.285910 C -3.620514 -0.016837 -0.597862 H -3.466127 -0.358635 -1.628791 H -3.798366 1.064153 -0.632984 H -4.538517 -0.486695 -0.225915 H -2.639583 -0.106122 1.326…	0	0	0	0	0	7	0	0	0	0	0	0	0	1	0	1	2	11	1
292	3255	CC(C)CC(C)(C)C(C)(C)C	C11H24	35	-65.9811	C 2.956708 0.015304 0.604321 H 3.024695 -0.840331 1.283810 H 2.955374 0.928090 1.210018 H 3.874540 0.026720 0.004127 C 1.725972 -0.077975 -0.328338 C 0.362043 0.084415 0.488448 C -0.846064 -0.349540 -0.402474 C -2.283256 -0.050141 0.111295 C -3.224786 -1.220675 -0.219429 H -2.886274 -2.151080 0.251878 H -3.268449 -1.394161 -1.302854 H -4.246749 -1.020703 0.125086 H -2.263340 0.048057 1.205357 H -…	0	0	0	0	0	7	0	0	0	0	0	0	0	1	0	1	2	9	1
293	3256	CCC(C)(C)[C@@H](C)C(C)(C)C	C11H24	35	-61.4358	C -1.857238 1.323403 -0.869147 H -1.392420 1.362514 -1.859839 H -1.475692 2.159506 -0.276587 H -2.932558 1.493320 -1.005860 C -1.641802 -0.041804 -0.181673 C -0.124973 -0.520112 -0.118722 C 1.037608 0.515762 0.191540 C 2.399524 -0.236928 0.353282 C 2.908430 -1.036351 -0.854149 H 3.058266 -0.397911 -1.731410 H 2.223923 -1.840854 -1.144677 H 3.874182 -1.499337 -0.619844 H 3.152468 0.525565 0.596439…	0	0	0	0	0	7	0	0	0	0	0	0	0	1	0	1	2	10	2
294	3257	CC(C)[C@H](C)[C@@H](C)C(C)(C)C	C11H24	35	-66.3468	C 2.182013 -0.455077 1.371176 H 1.442976 -1.035466 1.934306 H 2.283482 0.523164 1.855333 H 3.145613 -0.969841 1.471673 C 1.801537 -0.321311 -0.117527 C 0.453120 0.465451 -0.327631 C -0.770940 -0.176075 0.422686 C -1.981973 -0.400457 -0.534027 C -2.602589 0.888994 -1.096456 H -1.873359 1.491447 -1.648287 H -3.025295 1.515512 -0.301662 H -3.418799 0.648625 -1.788429 H -1.580775 -0.964239 -1.390190 …	0	0	0	0	0	7	0	0	0	0	0	0	0	0	0	3	1	8	1
295	3258	CC(C)C(C)(C)CC(C)(C)C	C11H24	35	-65.1587	C -2.542581 -1.393523 -0.862829 H -2.172704 -2.382281 -0.563901 H -2.368579 -1.283674 -1.940303 H -3.626491 -1.378408 -0.695430 C -1.845572 -0.267596 -0.062691 C -0.313072 -0.447422 -0.322973 C 0.787513 0.590089 0.071354 C 2.203452 -0.107222 -0.010734 C 2.479530 -1.141350 1.097006 H 1.787407 -1.990844 1.052202 H 2.415239 -0.709070 2.099834 H 3.491778 -1.546866 0.981705 C -2.218596 -0.462263 1.422…	0	0	0	0	0	7	0	0	0	0	0	0	0	1	0	1	2	8	2
296	3259	C[C@H](CC(C)(C)C)C(C)(C)C	C11H24	35	-70.1575	C -2.005135 -1.223223 -1.070330 H -1.707714 -2.186348 -0.637769 H -1.309720 -0.994534 -1.885725 H -3.000120 -1.350755 -1.514424 C -2.026815 -0.114195 0.000392 C -0.630317 0.029966 0.674714 C 0.552766 0.538355 -0.199748 C 1.882352 -0.276776 0.006857 C 2.335333 -0.282986 1.481632 H 1.592154 -0.749209 2.137869 H 2.523701 0.730050 1.854759 H 3.268764 -0.848980 1.589794 C -3.034556 -0.514618 1.097698 …	0	0	0	0	0	7	0	0	0	0	0	0	0	1	0	1	2	7	1
297	3260	CCC(C)(C)C(C)(C)C(C)C	C11H24	35	-60.9241	C -2.963107 -0.637651 -0.592273 H -3.333914 -1.001638 0.374380 H -2.763804 -1.506800 -1.224529 H -3.781034 -0.075667 -1.058638 C -1.735951 0.283689 -0.423045 C -0.492424 -0.406687 0.287550 C 0.904131 0.188203 -0.247443 C 2.073687 -0.267965 0.683452 C 3.502437 -0.029151 0.170056 H 3.698282 1.024407 -0.057790 H 3.720352 -0.611422 -0.731302 H 4.225559 -0.332864 0.936030 C -2.247580 1.576556 0.252080…	0	0	0	0	0	7	0	0	0	0	0	0	0	1	0	1	2	12	1
298	3261	CC(C)[C@H](C)C(C)(C)C(C)C	C11H24	35	-64.1685	C 2.784529 0.510161 1.143655 H 3.482438 -0.196918 0.678594 H 2.531922 0.128345 2.137021 H 3.328028 1.451872 1.285327 C 1.538502 0.753467 0.269399 C 0.693597 -0.546500 -0.026452 C -0.723808 -0.141226 -0.596985 C -1.657343 0.616046 0.411483 C -2.632331 -0.272836 1.207585 H -2.126462 -1.079368 1.745412 H -3.388633 -0.728179 0.558164 H -3.166255 0.333879 1.949042 C 1.972563 1.522756 -0.993938 H 2.729…	0	0	0	0	0	7	0	0	0	0	0	0	0	0	0	3	1	10	1
299	3262	CCC(CC)(CC)C(C)(C)C	C11H24	35	-59.3695	C 1.297943 -1.652767 1.640347 H 1.987130 -2.047637 0.885982 H 0.439992 -2.329626 1.693693 H 1.810850 -1.708887 2.608149 C 0.890248 -0.198214 1.359872 C 0.297326 0.185020 -0.033741 C 0.245080 1.750695 -0.077162 C -0.618599 2.528206 0.929603 H 0.193294 0.115301 2.143912 H -1.692174 2.396083 0.767665 H 1.781451 0.425489 1.508742 H -0.400705 2.252100 1.966852 H 1.273565 2.101386 0.064478 H -0.030960 …	0	0	0	0	0	6	0	0	0	0	0	0	0	3	0	0	2	12	0
300	3263	CCC(C(C)(C)C)C(C)(C)C	C11H24	35	-59.5672	C -0.548968 2.879566 -0.314297 H -1.530103 2.742953 -0.778757 H 0.175718 3.046769 -1.120692 H -0.591436 3.796056 0.287055 C -0.134782 1.677977 0.547470 C -0.018738 0.323003 -0.227759 C -1.302860 -0.589349 -0.014500 C -1.437867 -1.683766 -1.102373 H 0.823401 1.931487 1.007279 H -1.326941 -1.259061 -2.107914 H -0.826739 1.577143 1.391403 H -0.717055 -2.494374 -0.998089 H -2.436237 -2.135103 -1.0477…	0	0	0	0	0	7	0	0	0	0	0	0	0	1	0	1	2	9	2
301	3264	CC(C)C(C(C)C)C(C)(C)C	C11H24	35	-56.6205	C 0.319039 2.611991 0.133402 H 0.703671 2.793366 -0.876369 H 1.167628 2.534575 0.817290 H -0.246492 3.504331 0.429562 C -0.618288 1.390711 0.193748 C -0.087914 -0.001963 -0.307579 C -1.072505 -1.171186 0.129976 C -1.948356 -0.931754 1.376587 H -0.893505 1.283323 1.249577 H -1.350557 -0.651474 2.250940 H -2.714025 -0.162732 1.234524 H -2.471523 -1.862631 1.628127 C 1.423030 -0.391229 -0.017633 C 2…	0	0	0	0	0	7	0	0	0	0	0	0	0	0	0	3	1	8	2
302	3265	CCC(CC)(C(C)C)C(C)C	C11H24	35	-59.7401	C 0.987859 2.595567 0.264233 H 0.593306 2.946468 -0.695605 H 2.042110 2.340791 0.114198 H 0.955580 3.444399 0.957499 C 0.169720 1.427451 0.836361 C 0.047427 0.143625 -0.042802 C -0.760694 -0.969920 0.754838 C -1.504606 -1.997504 -0.125538 H 0.588416 1.157247 1.812922 H -2.377156 -1.553022 -0.617752 H -0.877533 -2.441525 -0.900893 H -1.874657 -2.816318 0.503503 C 1.508804 -0.368575 -0.378659 C 2.4…	0	0	0	0	0	6	0	0	0	0	0	0	0	2	0	2	1	12	0
303	3266	CC(C)C(C)(C(C)C)C(C)C	C11H24	35	-59.0866	C 1.292585 -2.245341 -0.620726 H 2.293199 -1.801430 -0.649625 H 0.961976 -2.385520 -1.653544 H 1.395267 -3.242950 -0.176309 C 0.292077 -1.416511 0.215323 C -0.044135 0.039190 -0.336030 C 0.850476 1.149158 0.348182 C 2.358078 1.032791 0.041851 H -0.650708 -1.974284 0.153606 H 2.760687 0.037220 0.241464 H 2.584056 1.281676 -1.001275 H 2.915406 1.740606 0.667291 C -1.574279 0.369951 -0.084994 C -2.5…	0	0	0	0	0	7	0	0	0	0	0	0	0	0	0	3	1	12	0
304	3267	CC[C@](C)(C(C)C)C(C)(C)C	C11H24	35	-59.6738	C 2.751733 0.000419 -0.018386 H 3.005521 -0.368407 0.982294 H 2.871596 1.086861 -0.015988 H 3.501823 -0.403555 -0.708317 C 1.344635 -0.457041 -0.465139 C 0.174380 0.104739 0.441362 C -1.289850 -0.254101 -0.131613 C -2.361319 0.730987 0.401807 H 1.193585 -0.037305 -1.467087 H -2.352730 0.798552 1.495640 H -2.248289 1.741790 -0.000856 H -3.357141 0.376821 0.109249 C 0.364068 1.653853 0.599238 C 0.4…	0	0	0	0	0	7	0	0	0	0	0	0	0	1	0	1	2	12	1
305	3268	CC(C)(C)C(C)(C)C(C)(C)C	C11H24	35	-58.6734	C 2.572041 0.670756 -0.391103 H 2.634949 1.575776 0.221802 H 2.535951 0.976127 -1.440921 H 3.509158 0.120180 -0.247546 C 1.379352 -0.246350 0.000996 C -0.000001 0.595674 -0.000070 C -1.379350 -0.246353 -0.000940 C -2.572039 0.670842 0.390950 H -2.535937 0.976467 1.440694 H -2.634957 1.575714 -0.222173 H -3.509155 0.120228 0.247538 C -0.006585 1.526378 -1.242084 H 0.733545 2.324691 -1.137964 H -0.…	0	0	0	0	0	8	0	0	0	0	0	0	0	0	0	0	3	12	2
306	3269	CCCCCCCCCCCC	C12H26	38	-71.8856	C 7.060007 -0.307342 0.000002 H 7.117423 -0.953705 0.884602 H 7.947322 0.336153 0.000006 H 7.117424 -0.953697 -0.884603 C 5.768910 0.517587 0.000006 H 5.757197 1.179144 0.878014 H 5.757198 1.179152 -0.877996 C 4.499396 -0.343780 0.000001 H 4.511751 -1.006388 0.878453 H 4.511752 -1.006380 -0.878457 C 3.201649 0.474223 0.000004 H 3.190438 1.136703 -0.878427 H 3.190437 1.136694 0.878442 C 1.932331 -…	0	0	0	0	0	2	0	0	0	0	0	0	0	10	0	0	0	0	0
307	3270	CCCCCCCCCC(C)C	C12H26	38	-72.8405	C -5.886609 -0.920396 -0.082050 H -5.725063 -1.859740 -0.624450 H -6.840637 -0.497548 -0.419055 H -5.990627 -1.165357 0.983276 C -4.728756 0.063657 -0.307675 H -4.669630 0.269761 -1.388049 C -3.389693 -0.570881 0.118725 H -3.307440 -1.560311 -0.355044 H -3.413148 -0.757257 1.203834 C -2.135345 0.242470 -0.229969 H -2.157710 1.210836 0.288163 H -2.139983 0.472298 -1.306244 C -0.829363 -0.480984 0.…	0	0	0	0	0	3	0	0	0	0	0	0	0	8	0	1	0	1	0
308	3271	CCCCCCCC[C@@H](C)CC	C12H26	38	-72.0809	C -6.077342 -0.377711 0.482137 H -6.007129 -0.249396 1.569741 H -6.839896 -1.140734 0.287745 H -6.443985 0.564268 0.060001 C -4.726675 -0.792453 -0.113360 H -4.468169 -1.791057 0.265791 C -3.553680 0.162879 0.192367 H -3.499431 0.278380 1.287444 C -2.224399 -0.466574 -0.274792 H -2.237206 -0.556464 -1.372231 H -2.172963 -1.495532 0.110777 C -0.952259 0.276219 0.157829 H -0.965782 0.412349 1.24983…	0	0	0	0	0	3	0	0	0	0	0	0	0	8	0	1	0	2	0
309	3272	CCCCCCC[C@H](C)CCC	C12H26	38	-71.9528	C -6.057379 -1.071339 -0.072190 H -5.829498 -2.072666 -0.458173 H -7.011016 -0.754470 -0.509928 H -6.202282 -1.161338 1.011579 C -4.933950 -0.081448 -0.400008 H -4.832909 0.007701 -1.491409 C -3.582941 -0.497266 0.199205 H -3.364162 -1.526037 -0.123322 C -2.383408 0.397894 -0.177132 H -2.344537 0.453324 -1.277429 C -1.068273 -0.253735 0.300518 H -1.059291 -1.302014 -0.032638 H -1.064632 -0.287484…	0	0	0	0	0	3	0	0	0	0	0	0	0	8	0	1	0	2	0
310	3273	CCCCCC[C@@H](C)CCCC	C12H26	38	-71.9744	C -6.275401 -0.395634 0.453847 H -6.238636 -0.392463 1.550324 H -7.087793 -1.065879 0.150176 H -6.541738 0.618216 0.130152 C -4.934324 -0.833521 -0.143760 H -4.713671 -1.864475 0.167799 C -3.765962 0.077271 0.257699 H -3.682450 0.094139 1.355080 C -2.424620 -0.362162 -0.346045 H -2.259954 -1.419614 -0.091635 C -1.191979 0.446321 0.111396 H -1.170267 0.421119 1.213233 C 0.100000 -0.231011 -0.39293…	0	0	0	0	0	3	0	0	0	0	0	0	0	8	0	1	0	2	0
311	3274	CCCCCC(C)CCCCC	C12H26	38	-72.0188	C -6.329593 -0.877306 0.014910 H -6.213436 -1.910541 -0.335107 H -7.265562 -0.488051 -0.402047 H -6.439044 -0.909414 1.106047 C -5.131311 -0.015538 -0.396133 H -5.069084 0.025539 -1.493020 C -3.797825 -0.524296 0.166470 H -3.637418 -1.561414 -0.164397 C -2.591586 0.331826 -0.242774 H -2.525548 0.361909 -1.340956 C -1.264207 -0.185718 0.329558 H -1.158406 -1.245681 0.055268 C 0.000000 0.566684 -0.…	0	0	0	0	0	3	0	0	0	0	0	0	0	8	0	1	0	2	0
312	3275	CCCCCCCC(CC)CC	C12H26	38	-70.1005	C 3.702046 2.333379 0.231386 H 2.747792 2.872149 0.225586 H 4.455192 2.998991 -0.206018 H 3.978506 2.162805 1.279327 C 3.626176 1.009290 -0.538546 H 3.396223 1.208880 -1.595844 C 2.592470 -0.000100 0.009772 H 2.698765 -0.025148 1.107242 C 1.149080 0.446363 -0.315236 H 1.065921 1.534685 -0.193781 C 0.057022 -0.211069 0.541189 H 0.250339 0.011073 1.601343 C -1.359780 0.254608 0.177925 H -1.419396 1…	0	0	0	0	0	3	0	0	0	0	0	0	0	8	0	1	0	3	0
313	3276	CCCCCC[C@H](CC)CCC	C12H26	38	-70.6852	C -4.393944 -2.385389 -0.082038 H -4.341414 -2.684416 0.972182 H -4.514144 -3.295808 -0.680509 H -5.301287 -1.781630 -0.208218 C -3.144304 -1.601924 -0.498353 H -2.263242 -2.248728 -0.392868 C -2.953040 -0.309059 0.307742 H -2.915568 -0.549219 1.381770 C -1.696428 0.511137 -0.061450 H -1.619798 0.531524 -1.161391 C -0.414203 -0.153705 0.489196 H -0.492123 -1.244066 0.382829 C 0.890934 0.296984 -0…	0	0	0	0	0	3	0	0	0	0	0	0	0	8	0	1	0	3	0
314	3277	CCCCC[C@@H](CC)CCCC	C12H26	38	-70.7382	C 4.366289 -2.589491 -0.393790 H 3.660567 -3.420908 -0.274002 H 5.332027 -2.911902 0.012177 H 4.497088 -2.420778 -1.469906 C 3.857251 -1.325648 0.307012 H 3.770517 -1.515353 1.386416 C 2.505000 -0.837890 -0.230024 H 1.767736 -1.645607 -0.120731 C 2.003750 0.438845 0.460192 H 1.941054 0.268591 1.546246 C 0.636515 0.958810 -0.038666 H 0.633111 0.893655 -1.139479 C -0.521003 0.081592 0.490234 H -0.2…	0	0	0	0	0	3	0	0	0	0	0	0	0	8	0	1	0	3	0
315	3278	CCCCCCCCC(C)(C)C	C12H26	38	-74.6753	C 4.883367 1.051976 -0.000034 H 4.801529 1.693869 -0.886084 H 5.886889 0.608737 -0.000030 H 4.801542 1.693911 0.885988 C 3.794492 -0.039778 0.000000 C 2.411865 0.665641 -0.000005 H 2.366764 1.328061 -0.877742 C 1.162388 -0.227650 0.000000 H 1.169770 -0.887125 -0.878553 C -0.142036 0.582536 0.000000 H -0.158384 1.244994 -0.878335 C -1.404610 -0.289040 -0.000001 H -1.388545 -0.951380 -0.878435 C -2…	0	0	0	0	0	4	0	0	0	0	0	0	0	7	0	0	1	2	0
316	3279	CCCCCCC[C@@H](C)C(C)C	C12H26	38	-72.1834	C 3.966491 -1.588078 -0.943428 H 3.191169 -2.286697 -0.606543 H 4.931912 -2.094814 -0.826130 H 3.811578 -1.408553 -2.014343 C 3.941449 -0.273504 -0.146463 C 2.650514 0.555125 -0.413692 H 2.521336 0.567263 -1.507899 C 1.377467 -0.079420 0.188136 H 1.384332 -1.161873 0.000993 C 0.058905 0.488797 -0.358830 H 0.051195 0.393128 -1.455046 C -1.182167 -0.206212 0.217367 H -1.127994 -1.283930 0.002356 C …	0	0	0	0	0	4	0	0	0	0	0	0	0	6	0	2	0	3	0
317	3280	CCCCCC[C@H](C)CC(C)C	C12H26	38	-73.2285	C 5.083683 -1.044156 -0.348315 H 4.957223 -1.976337 0.218055 H 6.091871 -0.665167 -0.142147 H 5.030328 -1.294019 -1.414821 C 4.010843 -0.014868 0.040721 C 2.609567 -0.553029 -0.316210 H 2.447767 -1.482212 0.251873 C 1.404361 0.381791 -0.074735 H 1.382233 0.647252 0.993072 C 0.094444 -0.376025 -0.381676 H 0.127346 -1.348534 0.131284 C -1.197602 0.343995 0.029952 H -1.138384 0.613852 1.095222 C -2.…	0	0	0	0	0	4	0	0	0	0	0	0	0	6	0	2	0	3	0
318	3281	CCCCC[C@@H](C)CCC(C)C	C12H26	38	-73.1144	C 4.344519 -1.147683 1.022413 H 4.583033 -0.341540 1.729252 H 5.219638 -1.805924 0.963892 H 3.520665 -1.730928 1.447339 C 3.994859 -0.574938 -0.359800 C 2.778234 0.372171 -0.316129 H 2.641846 0.807343 -1.317607 C 1.460223 -0.290554 0.113287 H 1.328260 -1.213290 -0.471379 C 0.200216 0.583003 -0.067826 H 0.167054 0.900973 -1.122804 C -1.066715 -0.255450 0.203730 H -0.991763 -1.192734 -0.367164 C -2…	0	0	0	0	0	4	0	0	0	0	0	0	0	6	0	2	0	3	0
319	3282	CCCC[C@H](C)CCCC(C)C	C12H26	38	-73.0747	C 5.345055 -0.820934 -0.507848 H 5.347856 -1.774280 0.036995 H 6.324344 -0.350934 -0.357390 H 5.242276 -1.049073 -1.575576 C 4.208053 0.087823 -0.016653 C 2.838299 -0.565328 -0.289467 H 2.759275 -1.489586 0.304009 C 1.617864 0.324343 -0.010617 H 1.579829 0.587267 1.055598 C 0.294538 -0.349208 -0.403449 H 0.246017 -1.331528 0.089206 C -0.984057 0.438107 -0.046487 H -0.945847 0.659489 1.032738 C -2…	0	0	0	0	0	4	0	0	0	0	0	0	0	6	0	2	0	3	0
320	3283	CCC[C@@H](C)CCCCC(C)C	C12H26	38	-73.0037	C 5.498125 0.676298 -0.144814 H 5.588974 0.691362 -1.239007 H 6.436961 0.279490 0.259754 H 5.398222 1.714402 0.194336 C 4.296932 -0.174985 0.293796 C 2.982466 0.431127 -0.237675 H 2.988683 0.386390 -1.338003 C 1.696696 -0.220527 0.290131 H 1.656962 -1.275910 -0.011888 C 0.421017 0.483728 -0.194141 H 0.401690 0.480438 -1.294536 C -0.863945 -0.168370 0.335876 H -0.837826 -1.239286 0.086032 C -2.182…	0	0	0	0	0	4	0	0	0	0	0	0	0	6	0	2	0	3	0
321	3284	CC[C@H](C)CCCCCC(C)C	C12H26	38	-73.1197	C -5.598577 -0.748663 0.423180 H -5.714253 -1.428587 -0.431258 H -6.540082 -0.198251 0.537897 H -5.457442 -1.363684 1.320115 C -4.415629 0.207220 0.206887 C -3.094758 -0.581882 0.106089 H -3.128194 -1.219864 -0.790901 C -1.819132 0.271573 0.075278 H -1.819229 0.918058 -0.812869 C -0.533037 -0.565980 0.079713 H -0.542449 -1.250388 -0.781713 C 0.748503 0.277911 0.042509 H 0.741053 0.907651 -0.86003…	0	0	0	0	0	4	0	0	0	0	0	0	0	6	0	2	0	3	0
322	3285	CC(C)CCCCCCC(C)C	C12H26	38	-73.806	C -5.667572 -0.966833 -0.003025 H -5.783485 -1.070080 -1.090058 H -6.624599 -0.614182 0.399808 H -5.478169 -1.966146 0.407044 C -4.526742 0.004197 0.336789 C -3.181932 -0.537195 -0.188485 H -3.218712 -0.576370 -1.288416 C -1.939157 0.249740 0.250583 H -1.989166 1.278109 -0.132375 C -0.624281 -0.390207 -0.215480 H -0.634168 -0.482078 -1.311890 C 0.624281 0.390207 0.215478 H 0.562648 1.417628 -0.17…	0	0	0	0	0	4	0	0	0	0	0	0	0	6	0	2	0	2	0
323	3286	CCCCCCCC(C)(C)CC	C12H26	38	-73.8076	C -3.104189 2.217612 0.051759 H -3.798477 2.225918 0.899239 H -3.347388 3.081910 -0.577078 H -2.094808 2.376617 0.447846 C -3.204515 0.921661 -0.762977 C -2.918667 -0.404541 -0.007317 C -1.514438 -0.413068 0.655797 H -1.497932 0.338494 1.457808 C -0.302566 -0.176657 -0.257942 H -0.382934 0.805413 -0.744190 C 1.031017 -0.246517 0.500034 H 1.024426 0.491161 1.316424 C 2.256086 -0.003718 -0.391018 H…	0	0	0	0	0	4	0	0	0	0	0	0	0	7	0	0	1	4	0
324	3287	CCCCCC[C@H](C)[C@H](C)CC	C12H26	38	-71.4526	C -4.589095 -1.768351 -0.380691 H -4.942451 -1.793466 0.655962 H -4.666523 -2.787624 -0.776441 H -5.281225 -1.137188 -0.952356 C -3.149844 -1.248472 -0.487623 C -2.964001 0.219064 -0.042840 C -1.586125 0.792108 -0.491332 H -1.477437 0.516583 -1.552613 C -0.387801 0.174103 0.262485 H -0.518578 -0.914793 0.323665 C 0.982952 0.453259 -0.373046 H 0.968294 0.125967 -1.423607 C 2.138654 -0.244785 0.356…	0	0	0	0	0	4	0	0	0	0	0	0	0	6	0	2	0	4	0
325	3288	CCCCC[C@@H](C)C[C@H](C)CC	C12H26	38	-72.529	C -5.457856 -0.470969 -0.253174 H -5.763340 -0.168091 0.754287 H -6.152617 -1.251830 -0.583426 H -5.592772 0.393702 -0.915266 C -4.010792 -0.976306 -0.292344 C -2.939035 0.077296 0.061829 C -1.536214 -0.494528 -0.237295 H -1.391117 -1.387854 0.389678 C -0.323468 0.440771 -0.037817 H -0.304879 0.764793 1.013583 C 0.980432 -0.346297 -0.292480 H 0.932409 -1.289845 0.270912 C 2.276792 0.380737 0.0923…	0	0	0	0	0	4	0	0	0	0	0	0	0	6	0	2	0	4	0
326	3289	CCCC[C@H](C)CC[C@H](C)CC	C12H26	38	-72.2838	C -5.140510 -1.109384 -0.508446 H -5.552151 -0.996877 0.500452 H -5.585286 -2.011901 -0.943306 H -5.481047 -0.252653 -1.103655 C -3.610146 -1.204113 -0.502162 C -2.877434 0.058888 -0.002468 C -1.359841 -0.078112 -0.249779 H -0.982252 -0.913750 0.356405 C -0.541148 1.192934 0.026465 H -0.545616 1.422070 1.101580 C 0.924074 1.150995 -0.460835 H 0.910250 0.874079 -1.527695 C 1.751585 0.085197 0.2876…	0	0	0	0	0	4	0	0	0	0	0	0	0	6	0	2	0	4	0
327	3290	CCC[C@@H](C)CCC[C@H](C)CC	C12H26	38	-72.3077	C -5.667970 -0.179255 -0.455481 H -6.016298 0.152619 0.528630 H -6.406081 -0.893151 -0.838907 H -5.673856 0.692878 -1.121533 C -4.274783 -0.816400 -0.392046 C -3.137404 0.134711 0.036626 C -1.771694 -0.560921 -0.142386 H -1.710357 -1.413584 0.551701 C -0.541022 0.338228 0.048677 H -0.504580 0.715071 1.080016 C 0.774912 -0.392275 -0.258218 H 0.804909 -1.316742 0.337161 C 2.062513 0.410456 0.024075…	0	0	0	0	0	4	0	0	0	0	0	0	0	6	0	2	0	4	0
328	3291	CC[C@H](C)CCCC[C@H](C)CC	C12H26	38	-72.3571	C 5.773758 -0.460965 0.314883 H 6.148797 0.531155 0.041071 H 6.516049 -1.194217 -0.021001 H 5.732311 -0.509810 1.410401 C 4.401140 -0.752108 -0.303263 C 3.255105 0.158934 0.185241 C 1.902673 -0.364709 -0.342182 H 1.887279 -0.274410 -1.439557 C 0.656564 0.317740 0.239792 H 0.650991 1.384354 -0.022081 C -0.656564 -0.317740 -0.239793 H -0.699402 -0.273741 -1.338645 C -1.902673 0.364710 0.342182 H -1…	0	0	0	0	0	4	0	0	0	0	0	0	0	6	0	2	0	4	0
329	3292	CCCCCCC(C)(C)CCC	C12H26	38	-73.0397	C 4.702244 -1.845451 -0.147491 H 4.642363 -2.111213 -1.210246 H 4.941820 -2.757787 0.410816 H 5.543436 -1.151244 -0.028742 C 3.391409 -1.217953 0.342142 C 3.038081 0.061781 -0.431136 C 1.749032 0.828350 -0.019677 C 0.513659 -0.090860 -0.221801 H 0.614899 -0.965322 0.435381 C -0.871480 0.528095 0.024038 H -0.926823 0.937804 1.041980 C -2.010040 -0.484822 -0.164705 H -1.859570 -1.333028 0.519823 C …	0	0	0	0	0	4	0	0	0	0	0	0	0	7	0	0	1	4	0
330	3293	CCCCC[C@@H](C)[C@@H](C)CCC	C12H26	38	-71.4514	C 4.310784 -2.344324 -0.340698 H 3.793183 -3.051743 0.319081 H 5.388489 -2.498076 -0.212764 H 4.056186 -2.610981 -1.373990 C 3.910019 -0.898795 -0.026236 C 2.404589 -0.647604 -0.200406 C 1.959548 0.814630 0.023204 C 0.531302 1.080325 -0.540547 H 0.529114 0.661486 -1.559628 C -0.585077 0.360148 0.247297 H -0.279860 -0.676378 0.444585 C -1.949801 0.328049 -0.457947 H -1.828407 -0.106493 -1.461730 C…	0	0	0	0	0	4	0	0	0	0	0	0	0	6	0	2	0	4	0
331	3294	CCCC[C@H](C)C[C@@H](C)CCC	C12H26	38	-72.4791	C 5.556632 -0.995091 -0.228314 H 5.589889 -1.655562 0.647071 H 6.538088 -0.515885 -0.320741 H 5.409587 -1.627557 -1.112580 C 4.436499 0.042857 -0.096225 C 3.046867 -0.596837 0.033639 C 1.860948 0.391081 0.076254 C 0.534769 -0.392116 -0.038215 H 0.468649 -1.078226 0.820284 C -0.775252 0.422640 -0.110752 H -0.855782 1.032288 0.801689 C -1.980834 -0.542257 -0.118479 H -1.849643 -1.268502 0.697268 C …	0	0	0	0	0	4	0	0	0	0	0	0	0	6	0	2	0	4	0
332	3295	CCC[C@H](C)CC[C@H](C)CCC	C12H26	38	-72.1873	C -4.515628 2.120554 0.523095 H -4.698887 1.837356 1.567084 H -5.456285 2.506237 0.113367 H -3.791194 2.944448 0.527733 C -3.996509 0.929693 -0.290325 C -2.678654 0.364631 0.259969 C -2.044598 -0.765873 -0.577003 C -0.651184 -1.167899 -0.045162 H -0.307976 -2.045417 -0.613248 C 0.426919 -0.076848 -0.143190 H 0.397956 0.350766 -1.156550 C 1.866615 -0.557976 0.139255 H 2.075489 -1.396150 -0.545633 …	0	0	0	0	0	4	0	0	0	0	0	0	0	6	0	2	0	4	0
333	3296	CCCCCC(C)(C)CCCC	C12H26	38	-73.7466	C -3.363381 2.988804 0.295319 H -3.947041 2.683370 1.172624 H -3.971667 3.697362 -0.278580 H -2.479365 3.527314 0.658883 C -2.964041 1.777295 -0.553259 C -2.110121 0.756493 0.212529 C -1.713406 -0.449572 -0.651622 C -0.879243 -1.569587 0.027981 C 0.441470 -1.032158 0.643606 H 0.194862 -0.362812 1.479880 C 1.410503 -0.300175 -0.296869 H 0.917689 0.577596 -0.737461 C 2.692082 0.156521 0.414669 H 2.…	0	0	0	0	0	4	0	0	0	0	0	0	0	7	0	0	1	4	0
334	3297	CCCC[C@H](C)[C@H](C)CCCC	C12H26	38	-71.4666	C -5.067043 -1.690350 -0.085077 H -5.704581 -0.821830 -0.292033 H -5.629668 -2.367965 0.567392 H -4.897539 -2.208953 -1.036880 C -3.742586 -1.264831 0.556975 C -2.919679 -0.315291 -0.324180 C -1.591953 0.109021 0.321879 C -0.695153 0.996576 -0.569041 C 0.765384 1.130177 -0.042088 H 1.259210 1.850063 -0.714312 C 1.546553 -0.196528 -0.168324 H 1.333729 -0.636211 -1.154191 C 3.069520 -0.066769 -0.01…	0	0	0	0	0	4	0	0	0	0	0	0	0	6	0	2	0	4	0
335	3298	CCCCCC(CCC)CCC	C12H26	38	-70.6831	C 2.667324 3.566589 0.079060 H 1.766134 4.191492 0.046468 H 3.437690 4.061832 -0.523211 H 3.017872 3.548264 1.118449 C 2.379250 2.151197 -0.433227 C 1.290532 1.432504 0.376611 C 0.972183 -0.006542 -0.088868 C -0.406092 -0.470797 0.434995 C -1.614934 0.146482 -0.283003 H -1.572953 1.243095 -0.224893 C -2.961088 -0.329615 0.279034 H -3.017906 -0.078419 1.348844 C -4.174816 0.267781 -0.444587 H -4.1…	0	0	0	0	0	3	0	0	0	0	0	0	0	8	0	1	0	3	0
336	3299	CCCCC(CCC)CCCC	C12H26	38	-70.722	C 4.474516 -2.110934 -0.412434 H 3.991751 -3.087536 -0.282719 H 5.493553 -2.188450 -0.016244 H 4.549883 -1.921200 -1.490353 C 3.682339 -1.003826 0.290586 C 2.246912 -0.860005 -0.232770 C 1.458930 0.261441 0.459193 C 0.000684 0.431018 -0.024978 C -0.903682 -0.696083 0.523813 H -0.355286 -1.647493 0.504514 C -2.225353 -0.894412 -0.231967 H -2.005781 -1.125275 -1.285231 C -3.098377 -2.010696 0.35685…	0	0	0	0	0	3	0	0	0	0	0	0	0	8	0	1	0	3	0
337	3300	CCCCC[C@@H](CCC)C(C)C	C12H26	38	-71.0661	C 3.139385 3.049052 0.143239 H 2.309305 3.764594 0.194958 H 3.941774 3.511710 -0.442901 H 3.513825 2.904901 1.164341 C 2.688530 1.720694 -0.474291 C 1.554630 1.050901 0.315818 C 1.032635 -0.278383 -0.278038 C -0.369120 -0.621413 0.280052 C -1.513682 0.195525 -0.338336 H -1.323509 1.270745 -0.212690 C -2.887941 -0.139188 0.256310 H -2.869440 0.044500 1.341086 C -4.039233 0.657765 -0.370696 H -3.84…	0	0	0	0	0	4	0	0	0	0	0	0	0	6	0	2	0	4	0
338	3301	CCCCC(CCCC)C(C)C	C12H26	38	-71.1195	C 4.508286 -1.904143 -0.339710 H 4.323640 -2.286680 -1.351216 H 5.134175 -2.636085 0.183680 H 5.089691 -0.979010 -0.438330 C 3.193531 -1.655240 0.406566 C 2.283772 -0.635551 -0.292020 C 0.960893 -0.397529 0.450728 C -0.010430 0.593505 -0.232672 C -1.450363 0.416633 0.305366 H -1.425159 0.360495 1.403447 C -2.186580 -0.813386 -0.246193 H -1.608323 -1.725852 -0.043110 C -3.598975 -0.983324 0.329061…	0	0	0	0	0	4	0	0	0	0	0	0	0	6	0	2	0	4	0
339	3302	CCCCCC[C@@H](CC)C(C)C	C12H26	38	-71.1217	C 3.281025 -1.299877 1.235742 H 3.369370 -0.521983 2.002495 H 4.208427 -1.884633 1.253715 H 2.466178 -1.970446 1.533344 C 3.045313 -0.710442 -0.165383 C 1.821809 0.250509 -0.242849 C 0.520086 -0.386855 0.298618 C -0.769624 0.239046 -0.253742 C -2.044427 -0.390773 0.323339 H -2.036662 -1.473223 0.125807 C -3.336919 0.216348 -0.237265 H -3.344635 0.108252 -1.332302 C -4.611956 -0.411385 0.340551 H …	0	0	0	0	0	4	0	0	0	0	0	0	0	6	0	2	0	4	0
340	3303	CCCCC[C@H](C)C(CC)CC	C12H26	38	-69.422	C 3.928885 -0.962071 -1.532005 H 3.298752 -1.172687 -2.405098 H 4.735704 -1.704689 -1.519164 H 4.384446 0.021636 -1.687011 C 3.104423 -1.017185 -0.238453 C 1.935464 0.007270 -0.179335 C 0.611924 -0.667274 0.293380 C -0.624163 0.221898 0.035957 C -1.970335 -0.515023 0.104503 H -1.951367 -1.369012 -0.589316 C -3.167996 0.382895 -0.233504 H -3.031487 0.808996 -1.238834 C -4.517335 -0.344585 -0.17274…	0	0	0	0	0	4	0	0	0	0	0	0	0	6	0	2	0	5	0
341	3304	CCCC[C@@H](C)CC(CC)CC	C12H26	38	-71.0338	C 3.399492 2.334828 0.415822 H 3.223159 2.273552 1.496985 H 3.435007 3.396564 0.145538 H 4.392483 1.914884 0.219487 C 2.297111 1.606529 -0.362524 C 2.165656 0.099880 -0.043803 C 0.802112 -0.446448 -0.528076 C -0.429907 -0.077286 0.329236 C -1.724884 -0.330007 -0.471704 H -1.641515 0.189530 -1.437604 C -3.024216 0.119860 0.210868 H -2.930833 1.174551 0.511930 C -4.260780 -0.039947 -0.684194 H -4.1…	0	0	0	0	0	4	0	0	0	0	0	0	0	6	0	2	0	5	0
342	3305	CCC[C@H](C)CCC(CC)CC	C12H26	38	-70.9611	C -3.303957 2.293920 -0.710239 H -2.378156 2.843695 -0.506731 H -4.139387 2.963085 -0.473865 H -3.336930 2.090030 -1.787765 C -3.397233 0.993551 0.097407 C -2.264927 -0.022076 -0.176134 C -0.930581 0.451204 0.444792 C 0.320516 -0.243627 -0.115835 C 1.665189 0.308898 0.404583 H 1.668967 1.396342 0.223616 C 2.832389 -0.298526 -0.402021 H 2.606449 -0.194139 -1.473610 C 4.212695 0.319816 -0.138181 H …	0	0	0	0	0	4	0	0	0	0	0	0	0	6	0	2	0	5	0
343	3306	CC[C@@H](C)CCCC(CC)CC	C12H26	38	-70.8174	C 3.148622 2.417535 -0.007068 H 2.210760 2.860577 -0.360669 H 3.966925 3.041784 -0.384257 H 3.155010 2.488103 1.087779 C 3.312318 0.962855 -0.464056 C 2.205149 0.002170 0.025299 C 0.879258 0.248008 -0.729498 C -0.374557 -0.315493 -0.043447 C -1.659920 -0.043042 -0.838027 H -1.803545 1.042852 -0.937707 C -2.939810 -0.684286 -0.262239 H -2.758835 -1.769500 -0.208123 C -3.275856 -0.232640 1.178761 H…	0	0	0	0	0	4	0	0	0	0	0	0	0	6	0	2	0	5	0
344	3307	CCC(CC)CCCCC(C)C	C12H26	38	-71.7855	C 3.663335 -2.263278 -0.465418 H 2.734707 -2.835558 -0.360115 H 4.483789 -2.907948 -0.129500 H 3.811298 -2.068005 -1.534847 C 3.632159 -0.953846 0.332154 C 2.507800 0.025152 -0.074717 C 1.128423 -0.476521 0.409038 C -0.078017 0.151211 -0.304213 C -1.425849 -0.366800 0.217364 H -1.460139 -1.461452 0.108461 C -2.630289 0.251026 -0.506603 H -2.505209 0.095312 -1.588399 C -4.007403 -0.303899 -0.09036…	0	0	0	0	0	4	0	0	0	0	0	0	0	6	0	2	0	4	0
345	3308	CCCCC[C@H](CC)CC(C)C	C12H26	38	-71.949	C 4.003987 -1.316460 -1.037249 H 3.876117 -0.938933 -2.058925 H 4.317241 -2.365291 -1.103476 H 4.825676 -0.753239 -0.575288 C 2.710717 -1.171161 -0.219543 C 2.270092 0.308740 -0.191263 C 0.921306 0.635991 0.489667 C -0.270169 0.009990 -0.266989 C -1.643155 0.211744 0.391027 H -1.593735 -0.110417 1.442294 C -2.768605 -0.553301 -0.318423 H -2.528180 -1.627042 -0.329757 C -4.147801 -0.351608 0.32241…	0	0	0	0	0	4	0	0	0	0	0	0	0	6	0	2	0	4	0
346	3309	CCCCC[C@H](CC)[C@@H](C)CC	C12H26	38	-70.3904	C -3.364374 -2.489432 -0.608867 H -2.566116 -3.232806 -0.729996 H -4.125926 -2.694807 -1.370045 H -3.827752 -2.656586 0.369540 C -2.819056 -1.063146 -0.753939 C -1.652578 -0.717918 0.198226 C -0.998003 0.647987 -0.172570 C 0.441647 0.782129 0.377085 C 1.493500 -0.086668 -0.328497 H 1.222498 -1.149019 -0.255314 C 2.908880 0.102942 0.233412 H 2.908962 -0.135708 1.307637 C 3.969819 -0.751100 -0.4727…	0	0	0	0	0	4	0	0	0	0	0	0	0	6	0	2	0	5	0
347	3310	CCCCC[C@](C)(CC)CCC	C12H26	38	-72.4743	C 4.617406 -0.939776 -0.973634 H 4.494336 -2.027827 -1.040984 H 5.642978 -0.740332 -0.642117 H 4.509897 -0.533181 -1.986973 C 3.589979 -0.323610 -0.016206 C 2.145755 -0.585215 -0.470020 C 0.994808 -0.060679 0.436159 C -0.334042 -0.411983 -0.293579 C -1.648829 0.044356 0.357126 H -1.720521 -0.340661 1.383268 C -2.884661 -0.415077 -0.430083 H -2.877663 -1.512446 -0.510685 C -4.211816 0.036619 0.192…	0	0	0	0	0	4	0	0	0	0	0	0	0	7	0	0	1	6	0
348	3311	CCCC[C@@H](C)[C@H](CC)CCC	C12H26	38	-70.3402	C -3.858325 -2.378891 -0.287759 H -3.924209 -2.622917 0.779832 H -3.928119 -3.318189 -0.848400 H -4.737085 -1.773120 -0.541803 C -2.558781 -1.631339 -0.606214 C -2.434199 -0.301767 0.152456 C -1.153261 0.510115 -0.150994 C 0.122528 -0.135728 0.472138 C 1.404940 0.340171 -0.245852 H 1.251813 0.240356 -1.330602 C 2.684195 -0.420192 0.133672 H 2.516464 -1.500803 0.007735 C 3.903520 -0.000413 -0.6986…	0	0	0	0	0	4	0	0	0	0	0	0	0	6	0	2	0	5	0
349	3312	CCC[C@H](C)C[C@H](CC)CCC	C12H26	38	-71.0611	C 3.454370 -2.831966 0.044904 H 2.643716 -3.549652 0.222323 H 4.320663 -3.156248 0.632969 H 3.727590 -2.899406 -1.015448 C 3.025632 -1.408345 0.416733 C 1.801912 -0.926639 -0.375796 C 1.334185 0.510095 -0.050550 C -0.121395 0.734048 -0.523597 C -1.230200 0.094064 0.342417 H -0.941824 -0.944899 0.565548 C -2.553823 0.039678 -0.449409 H -2.360137 -0.447778 -1.416315 C -3.709603 -0.697922 0.241247 H…	0	0	0	0	0	4	0	0	0	0	0	0	0	6	0	2	0	5	0
350	3313	CCC[C@@H](CC)CC[C@H](C)CC	C12H26	38	-70.788	C 3.794127 -2.551414 -0.206539 H 3.070848 -3.352062 -0.007720 H 4.737622 -2.827214 0.278448 H 3.970480 -2.528369 -1.289097 C 3.278012 -1.199952 0.299348 C 1.946649 -0.789472 -0.346506 C 1.386015 0.573611 0.118788 C -0.122552 0.695586 -0.197220 C -1.036936 -0.131158 0.720827 H -0.790538 -1.200377 0.646383 C -2.551726 0.042602 0.472794 H -2.763560 1.124234 0.450110 C -2.987000 -0.547423 -0.885082 H…	0	0	0	0	0	4	0	0	0	0	0	0	0	6	0	2	0	5	0
351	3314	CCC[C@@H](CC)CCCC(C)C	C12H26	38	-71.8956	C 3.793968 -2.504292 -0.544352 H 3.035955 -3.297395 -0.541557 H 4.719785 -2.926726 -0.137058 H 3.983834 -2.234134 -1.590639 C 3.328250 -1.289114 0.265400 C 2.034812 -0.669757 -0.283902 C 1.438919 0.474621 0.564435 C 0.071440 0.941931 0.015995 C -1.078481 -0.062821 0.187949 H -0.857331 -0.989770 -0.359010 C -2.425259 0.490142 -0.300683 H -2.306720 0.830894 -1.339937 C -3.605624 -0.500357 -0.244577…	0	0	0	0	0	4	0	0	0	0	0	0	0	6	0	2	0	4	0
352	3315	CCCC[C@@H](CC)CCC(C)C	C12H26	38	-71.7523	C 4.205400 -1.134107 -1.094064 H 3.842996 -1.302132 -2.115375 H 4.931496 -1.922226 -0.861256 H 4.742016 -0.176136 -1.085061 C 3.048826 -1.124160 -0.083037 C 2.011453 -0.046571 -0.460126 C 0.712065 -0.082449 0.359341 C -0.367841 0.926374 -0.095262 C -1.759241 0.537277 0.453989 H -1.668282 0.332483 1.532035 C -2.420464 -0.661679 -0.240907 H -1.768986 -1.544764 -0.181194 C -3.793606 -1.019221 0.3437…	0	0	0	0	0	4	0	0	0	0	0	0	0	6	0	2	0	4	0
353	3316	CCCC[C@@H](CC)C[C@@H](C)CC	C12H26	38	-71.3012	C -4.364405 -1.420848 -0.769783 H -3.830641 -2.212559 -1.310673 H -5.271754 -1.186053 -1.338200 H -4.681660 -1.833433 0.194088 C -3.486121 -0.174762 -0.606053 C -2.130046 -0.414876 0.092706 C -1.267871 0.864191 -0.006542 C 0.182630 0.792817 0.523728 C 1.044035 -0.195944 -0.291146 H 0.547192 -1.175504 -0.293330 C 2.478602 -0.391398 0.220780 H 2.452827 -0.637652 1.293319 C 3.240978 -1.492048 -0.529…	0	0	0	0	0	4	0	0	0	0	0	0	0	6	0	2	0	5	0
354	3317	CCCC[C@@H](CC)[C@H](C)CCC	C12H26	38	-70.3048	C 4.342286 -1.589837 -0.902519 H 4.030491 -1.748777 -1.942273 H 4.986026 -2.429291 -0.615510 H 4.952931 -0.678685 -0.877470 C 3.130206 -1.469690 0.027960 C 2.207148 -0.300882 -0.347377 C 0.906262 -0.201315 0.479674 C -0.080481 0.840477 -0.131715 C -1.541573 0.606519 0.318876 H -1.582364 0.538149 1.415687 C -2.224401 -0.625602 -0.292894 H -1.666338 -1.537716 -0.039435 C -3.680972 -0.796394 0.15933…	0	0	0	0	0	4	0	0	0	0	0	0	0	6	0	2	0	5	0
355	3318	CCCCC(C)(CC)CCCC	C12H26	38	-72.4708	C -5.164681 -0.286225 -0.220085 H -5.319968 -0.796818 0.738455 H -5.956456 -0.613936 -0.903566 H -5.298745 0.788709 -0.046366 C -3.773947 -0.586399 -0.788486 C -2.632413 -0.143689 0.138540 C -1.246039 -0.444170 -0.450904 C 0.000001 -0.091098 0.411783 C 1.246040 -0.444168 -0.450906 H 1.194559 -1.517650 -0.687308 C 2.632415 -0.143690 0.138540 H 2.752249 -0.644325 1.108900 C 3.773948 -0.586393 -0.78…	0	0	0	0	0	4	0	0	0	0	0	0	0	7	0	0	1	6	0
356	3319	CCCCCC[C@@H](C)C(C)(C)C	C12H26	38	-73.0936	C 4.231336 0.411565 -0.620311 H 4.075862 0.728425 -1.659659 H 5.112689 -0.240988 -0.601587 H 4.471705 1.301260 -0.029355 C 2.997897 -0.337794 -0.071590 C 1.700933 0.523272 -0.284605 C 0.432868 -0.103270 0.346552 C -0.884988 0.354987 -0.297442 C -2.125989 -0.262192 0.361432 H -2.049504 -1.359281 0.324769 C -3.446151 0.174348 -0.286639 H -3.433210 -0.092619 -1.354068 C -4.687230 -0.441415 0.372314 …	0	0	0	0	0	5	0	0	0	0	0	0	0	5	0	1	1	5	0
357	3320	CCCCC[C@H](C)CC(C)(C)C	C12H26	38	-73.7515	C -3.646139 0.031446 -0.679772 H -4.161155 0.704826 0.016439 H -4.398796 -0.644285 -1.104964 H -3.247460 0.636111 -1.502039 C -2.540171 -0.771611 0.031339 C -1.494641 0.156146 0.712679 C -0.771027 1.215665 -0.163498 C 0.725500 1.338547 0.201704 C 1.600566 0.150574 -0.220236 H 1.215376 -0.779811 0.220191 C 3.074803 0.314531 0.173152 H 3.148094 0.440723 1.263809 C 3.960482 -0.861123 -0.259315 H 3.5…	0	0	0	0	0	5	0	0	0	0	0	0	0	5	0	1	1	4	1
358	3321	CCCC[C@@H](C)CCC(C)(C)C	C12H26	38	-74.7542	C 4.367471 0.532281 -0.788491 H 4.207752 0.530268 -1.874021 H 5.346942 0.077976 -0.594169 H 4.413038 1.578040 -0.459671 C 3.245753 -0.233687 -0.058412 C 1.898843 0.465767 -0.390037 C 0.634279 -0.110781 0.266002 C -0.688327 0.529906 -0.211780 C -1.888408 -0.270849 0.337133 H -1.719248 -1.337353 0.127291 C -3.260663 0.120861 -0.228921 H -3.224090 0.084262 -1.328378 C -4.396899 -0.784140 0.266838 H …	0	0	0	0	0	5	0	0	0	0	0	0	0	5	0	1	1	4	0
359	3322	CCC[C@H](C)CCCC(C)(C)C	C12H26	38	-74.8318	C 4.385744 -1.105026 -0.621198 H 4.214994 -2.144532 -0.314486 H 5.411313 -0.837303 -0.338232 H 4.319709 -1.064757 -1.715662 C 3.363266 -0.155039 0.034408 C 1.945063 -0.598138 -0.414555 C 0.750096 0.203396 0.124823 C -0.590147 -0.331826 -0.403158 C -1.850516 0.343767 0.177624 H -1.787132 0.273882 1.275966 C -3.112691 -0.427402 -0.263089 H -2.954330 -1.497523 -0.063095 C -4.421622 0.000976 0.415415…	0	0	0	0	0	5	0	0	0	0	0	0	0	5	0	1	1	4	0
360	3323	CC[C@@H](C)CCCCC(C)(C)C	C12H26	38	-74.8478	C 3.680463 -1.489339 -0.525000 H 2.994816 -2.185546 -0.029324 H 4.701692 -1.837248 -0.326178 H 3.509104 -1.561868 -1.606511 C 3.491389 -0.042600 -0.027945 C 2.084015 0.493667 -0.403717 C 0.868314 -0.249318 0.169983 C -0.465339 0.368905 -0.276393 C -1.687913 -0.363342 0.294881 H -1.598568 -1.431795 0.048886 C -3.058074 0.138753 -0.207067 H -3.040380 0.105185 -1.308896 C -4.175674 -0.814932 0.26568…	0	0	0	0	0	5	0	0	0	0	0	0	0	5	0	1	1	4	0
361	3324	CCCCCCC(C)(C)C(C)C	C12H26	38	-73.0204	C 2.221422 1.873227 -0.856978 H 2.917861 1.638835 -1.670938 H 2.445871 2.893508 -0.523884 H 1.209919 1.882453 -1.274973 C 2.367565 0.890195 0.319045 C 2.006829 -0.594455 -0.040333 C 0.578341 -0.697581 -0.651629 C -0.593227 -0.150189 0.177867 C -1.952540 -0.387311 -0.496211 H -1.949122 0.075461 -1.494537 C -3.139565 0.156533 0.309042 H -3.002858 1.235663 0.475458 C -4.498259 -0.082050 -0.362310 H …	0	0	0	0	0	5	0	0	0	0	0	0	0	5	0	1	1	6	0
362	3325	CCCCC[C@H](C)[C@H](C)C(C)C	C12H26	38	-70.9797	C 4.382257 -0.580409 -0.799384 H 4.607119 -1.481006 -0.216431 H 5.303431 0.012958 -0.845089 H 4.138233 -0.895379 -1.821509 C 3.241437 0.245422 -0.179419 C 1.861783 -0.468750 -0.304528 C 0.641406 0.437249 0.057376 C -0.689213 -0.197572 -0.417854 C -1.954868 0.375183 0.238372 H -1.876171 0.261775 1.330046 C -3.243348 -0.302794 -0.247021 H -3.180574 -1.384618 -0.055569 C -4.514128 0.252446 0.409110 …	0	0	0	0	0	5	0	0	0	0	0	0	0	4	0	3	0	5	0
363	3326	CCCC[C@@H](C)C[C@H](C)C(C)C	C12H26	38	-72.641	C -4.564312 0.442839 -0.442003 H -4.903359 0.581898 0.591679 H -5.374984 -0.058603 -0.984179 H -4.430419 1.436775 -0.886180 C -3.268770 -0.382214 -0.513373 C -2.057434 0.378511 0.103871 C -0.720194 -0.264963 -0.325184 C 0.578236 0.487007 0.045832 C 1.799457 -0.362762 -0.368233 H 1.650139 -1.388370 0.000453 C 3.158098 0.139624 0.140235 H 3.113998 0.262940 1.233067 C 4.318411 -0.800924 -0.213209 H …	0	0	0	0	0	5	0	0	0	0	0	0	0	4	0	3	0	5	0
364	3327	CCC[C@H](C)CC[C@H](C)C(C)C	C12H26	38	-72.4547	C 4.526505 -0.067885 -0.599363 H 4.942474 -0.123500 0.413769 H 5.191252 0.576026 -1.187619 H 4.567117 -1.074600 -1.033050 C 3.092084 0.485564 -0.600221 C 2.084165 -0.494983 0.066815 C 0.622509 -0.109587 -0.252611 C -0.410149 -1.196886 0.087103 C -1.840362 -0.933493 -0.434013 H -1.766228 -0.725783 -1.514045 C -2.482028 0.299296 0.236048 H -1.796774 1.153139 0.150267 C -3.842443 0.724929 -0.335917 …	0	0	0	0	0	5	0	0	0	0	0	0	0	4	0	3	0	5	0
365	3328	CC[C@@H](C)CCC[C@H](C)C(C)C	C12H26	38	-72.6063	C 4.695719 -0.734526 -0.611642 H 5.088587 -0.932634 0.392805 H 5.514035 -0.302729 -1.200252 H 4.432022 -1.698614 -1.063614 C 3.489101 0.217578 -0.577400 C 2.241625 -0.436866 0.084206 C 0.960646 0.381867 -0.187964 C -0.354769 -0.354734 0.109815 C -1.592474 0.470940 -0.271676 H -1.517950 1.453663 0.217037 C -2.951543 -0.156735 0.102522 H -2.929019 -0.377775 1.182400 C -4.086951 0.860976 -0.136504 H…	0	0	0	0	0	5	0	0	0	0	0	0	0	4	0	3	0	5	0
366	3329	CCCCCC(C)(C)CC(C)C	C12H26	38	-72.3272	C -4.259628 -1.367086 -0.174864 H -4.256225 -1.783608 -1.190842 H -5.298964 -1.127955 0.081523 H -3.916771 -2.154120 0.507313 C -3.360967 -0.122201 -0.089948 C -1.894998 -0.473102 -0.464513 C -0.746483 0.159969 0.376072 C 0.582080 -0.250545 -0.320581 C 1.899794 0.174678 0.344921 H 1.931191 1.266311 0.463422 C 3.132177 -0.270304 -0.455863 H 3.078151 0.149936 -1.471398 C 4.462885 0.138347 0.188930 …	0	0	0	0	0	5	0	0	0	0	0	0	0	5	0	1	1	5	1
367	3330	CCCC[C@@H](C)[C@@H](C)CC(C)C	C12H26	38	-72.6074	C 4.040334 0.237885 -0.649859 H 3.904161 0.079989 -1.728170 H 5.098897 0.065431 -0.421261 H 3.825730 1.291059 -0.438385 C 3.143862 -0.712111 0.158908 C 1.644784 -0.541498 -0.169563 C 1.024273 0.850030 0.085455 C -0.429113 0.935508 -0.474558 C -1.457856 0.131029 0.350872 H -1.031298 -0.845831 0.616188 C -2.798069 -0.113946 -0.359112 H -2.611600 -0.607202 -1.325099 C -3.769340 -0.970789 0.464075 H …	0	0	0	0	0	5	0	0	0	0	0	0	0	4	0	3	0	5	0
368	3331	CCC[C@H](C)C[C@@H](C)CC(C)C	C12H26	38	-73.6591	C 3.858836 1.099954 -0.710646 H 3.701601 0.938266 -1.785521 H 4.895569 1.430141 -0.573811 H 3.207328 1.923899 -0.399696 C 3.584362 -0.187519 0.081408 C 2.148349 -0.713978 -0.122408 C 0.983820 0.212457 0.292844 C -0.352608 -0.447192 -0.114490 C -1.649694 0.359143 0.115388 H -1.732336 0.585220 1.189104 C -2.868965 -0.511320 -0.258723 H -2.756861 -1.493654 0.223687 C -4.237598 0.063827 0.132731 H -4…	0	0	0	0	0	5	0	0	0	0	0	0	0	4	0	3	0	5	0
369	3332	CC[C@@H](C)CC[C@@H](C)CC(C)C	C12H26	38	-73.6519	C 3.532667 -1.020489 -1.268697 H 2.932842 -1.932166 -1.392242 H 4.579587 -1.284556 -1.460508 H 3.223973 -0.312016 -2.045137 C 3.363136 -0.442172 0.144469 C 1.893484 -0.102958 0.472266 C 1.188962 0.930912 -0.432203 C -0.286369 1.133206 -0.019671 C -1.186799 -0.102031 -0.180039 H -1.011357 -0.534048 -1.176722 C -2.698507 0.171754 -0.029294 H -2.966450 0.960512 -0.751478 C -3.504028 -1.090259 -0.403…	0	0	0	0	0	5	0	0	0	0	0	0	0	4	0	3	0	5	0
370	3333	CC(C)CCC[C@@H](C)CC(C)C	C12H26	38	-74.3678	C 3.905363 1.349654 -0.790376 H 3.697239 1.205796 -1.859120 H 4.912180 1.775504 -0.703643 H 3.198399 2.095821 -0.411573 C 3.805698 0.018234 -0.030479 C 2.415713 -0.637700 -0.166413 C 1.197746 0.160755 0.347146 C -0.099900 -0.605850 0.011985 C -1.405749 0.162049 0.265701 H -1.509466 0.389105 1.335619 C -2.646701 -0.615234 -0.197630 H -2.628111 -1.612143 0.267210 C -4.000510 0.047717 0.126118 H -4.…	0	0	0	0	0	5	0	0	0	0	0	0	0	4	0	3	0	4	0
371	3334	CCCCC(C)(C)CCC(C)C	C12H26	38	-74.7863	C -2.653816 -1.627614 1.243213 H -2.034314 -2.456182 0.874155 H -3.597678 -2.055425 1.601859 H -2.143214 -1.187417 2.106228 C -2.906146 -0.598157 0.130816 C -1.601507 0.015676 -0.420569 C -0.799715 0.833332 0.604138 C 0.436450 1.610651 0.071528 C 1.451001 0.681513 -0.648756 H 0.982113 0.288226 -1.561846 C 2.019433 -0.498104 0.153902 H 1.205016 -1.156030 0.487774 C 3.027371 -1.329848 -0.652265 H 2…	0	0	0	0	0	5	0	0	0	0	0	0	0	5	0	1	1	5	0
372	3335	CCC[C@H](C)[C@H](C)CCC(C)C	C12H26	38	-72.5673	C -4.354551 -1.176168 -0.777707 H -4.904390 -0.241268 -0.949107 H -5.049119 -1.888718 -0.316817 H -4.064615 -1.575236 -1.757181 C -3.127899 -0.935282 0.115035 C -2.136005 0.022404 -0.576195 C -0.789926 0.190714 0.147654 C 0.269584 0.975563 -0.657318 C 1.704454 0.876873 -0.057435 H 2.331953 1.533126 -0.681724 C 2.287988 -0.547164 -0.191169 H 2.052416 -0.931254 -1.195024 C 3.806733 -0.645486 0.0173…	0	0	0	0	0	5	0	0	0	0	0	0	0	4	0	3	0	5	0
373	3336	CC[C@@H](C)C[C@H](C)CCC(C)C	C12H26	38	-73.7094	C 4.914913 -0.771294 -0.519923 H 5.157582 -1.095776 0.500646 H 5.815655 -0.311348 -0.943807 H 4.687074 -1.668336 -1.108238 C 3.734766 0.211974 -0.516786 C 2.463151 -0.471447 0.026682 C 1.180247 0.365637 -0.091887 C -0.125755 -0.390888 0.236459 C -1.338140 0.491548 -0.132752 H -1.289853 1.409382 0.473410 C -2.746154 -0.122034 0.026851 H -2.884871 -0.405079 1.081224 C -3.812968 0.946144 -0.297503 H…	0	0	0	0	0	5	0	0	0	0	0	0	0	4	0	3	0	5	0
374	3337	CC(C)CCC(C)CCC(C)C	C12H26	38	-74.185	C -3.953964 -0.406446 1.320911 H -3.479505 -1.287146 1.774375 H -5.034986 -0.492538 1.483726 H -3.607313 0.477403 1.866884 C -3.629362 -0.323818 -0.178601 C -2.114440 -0.219775 -0.449997 C -1.446487 1.047774 0.105367 C 0.005442 1.287957 -0.362985 C 0.964791 0.188448 0.140032 H 0.971914 0.210001 1.239557 C 2.400799 0.290570 -0.398493 H 2.893425 1.188693 0.000391 C 3.293044 -0.930816 -0.096988 H 2.…	0	0	0	0	0	5	0	0	0	0	0	0	0	4	0	3	0	4	0
375	3338	CCCC(C)(C)CCCC(C)C	C12H26	38	-74.7697	C -3.684196 -0.295587 1.321556 H -4.007278 -1.300194 1.017150 H -4.526598 0.180614 1.837410 H -2.875140 -0.412079 2.050491 C -3.250168 0.530541 0.100913 C -2.077923 -0.115294 -0.664821 C -0.763172 -0.231930 0.121535 C 0.381374 -0.786052 -0.741066 C 1.756670 -0.995197 -0.050277 C 2.297476 0.309058 0.596235 H 3.270889 0.077718 1.054681 C 2.469768 1.530802 -0.318537 H 3.133091 1.283729 -1.157416 C 3…	0	0	0	0	0	5	0	0	0	0	0	0	0	5	0	1	1	5	0
376	3339	CC[C@@H](C)[C@@H](C)CCCC(C)C	C12H26	38	-72.4809	C -4.237861 -1.015294 -0.779960 H -4.215899 -0.639169 -1.811639 H -5.256185 -1.368700 -0.578362 H -3.571443 -1.882791 -0.726990 C -3.833165 0.087235 0.210719 C -2.411340 0.623929 -0.049509 C -1.278959 -0.397725 0.130706 C 0.114351 0.228305 -0.038033 C 1.289159 -0.772561 0.028267 C 2.614867 -0.146211 -0.499617 H 2.358397 0.340207 -1.454553 C 3.189535 0.949484 0.424768 H 2.380885 1.623868 0.733980 …	0	0	0	0	0	5	0	0	0	0	0	0	0	4	0	3	0	5	0
377	3340	CCC(C)(C)CCCCC(C)C	C12H26	38	-74.8418	C -4.932246 -0.511078 -0.813121 H -4.953338 0.250744 -1.603640 H -5.920098 -0.521432 -0.337116 H -4.780947 -1.484814 -1.294375 C -3.823721 -0.211645 0.207365 C -2.439116 -0.258379 -0.469649 C -1.238201 -0.160236 0.481476 C 0.112095 -0.315477 -0.234287 C 1.305451 -0.205284 0.726550 C 2.724800 -0.385229 0.122556 C 3.007237 0.620038 -1.026791 H 4.028191 0.434248 -1.390125 C 2.867468 2.110658 -0.6924…	0	0	0	0	0	5	0	0	0	0	0	0	0	5	0	1	1	5	0
378	3341	CC(C)CCCC[C@@H](C)C(C)C	C12H26	38	-73.3187	C 5.289861 -0.828927 -0.295362 H 5.418749 -1.203351 0.728808 H 6.228157 -0.344509 -0.591132 H 5.138736 -1.696182 -0.949347 C 4.107080 0.147905 -0.377064 C 2.790061 -0.566819 -0.013559 C 1.512499 0.254765 -0.235776 C 0.228725 -0.540620 0.041292 C -1.049303 0.283457 -0.174782 C -2.368083 -0.501401 -0.000621 C -3.579595 0.281134 -0.585631 H -3.281126 0.579847 -1.602401 C -3.922543 1.568328 0.182891 …	0	0	0	0	0	5	0	0	0	0	0	0	0	4	0	3	0	4	0
379	3342	CC(C)CCCCCC(C)(C)C	C12H26	38	-75.6747	C -5.402440 -0.858350 0.043866 H -5.540786 -0.983878 -1.038186 H -6.331674 -0.441161 0.450090 H -5.263451 -1.855492 0.478664 C -4.203449 0.054968 0.340853 C -2.899737 -0.575954 -0.188187 C -1.607501 0.148803 0.213598 C -0.338995 -0.575979 -0.256631 C 0.959659 0.141585 0.138927 C 2.214348 -0.602915 -0.341336 C 3.592332 0.025115 -0.000875 C 4.687392 -0.893354 -0.579610 H 4.589566 -0.990220 -1.66812…	0	0	0	0	0	5	0	0	0	0	0	0	0	5	0	1	1	3	0
380	3343	CCCCC[C@H](C)C(C)(C)CC	C12H26	38	-72.0914	C 3.598593 -1.293976 -1.118905 H 2.846756 -2.087718 -1.047384 H 4.583364 -1.771541 -1.056383 H 3.515945 -0.848430 -2.116276 C 3.446245 -0.246831 -0.007528 C 2.112713 0.555168 0.032468 C 0.872683 -0.401081 0.171352 C -0.474468 0.351203 0.317101 C -1.704094 -0.470142 -0.101712 C -3.024886 0.293481 0.062973 C -4.257448 -0.511041 -0.369816 C -5.571644 0.258666 -0.202766 H -5.570354 1.179305 -0.799429…	0	0	0	0	0	5	0	0	0	0	0	0	0	5	0	1	1	7	0
381	3344	CCCC[C@@H](C)CC(C)(C)CC	C12H26	38	-72.3256	C -3.933111 -1.656735 -0.433480 H -3.656691 -2.476286 0.238812 H -4.476479 -2.097840 -1.277170 H -4.635950 -1.008355 0.101245 C -2.706830 -0.887208 -0.941338 C -1.820439 -0.177248 0.121290 C -0.626337 0.453076 -0.655601 C 0.372428 1.352806 0.123790 C 1.834309 1.095882 -0.306528 C 2.425937 -0.243811 0.151515 C 3.875419 -0.454121 -0.306846 C 4.472113 -1.784086 0.164989 H 3.893945 -2.635351 -0.21541…	0	0	0	0	0	5	0	0	0	0	0	0	0	5	0	1	1	6	1
382	3345	CCC[C@H](C)CCC(C)(C)CC	C12H26	38	-73.3723	C -3.778602 1.376953 -1.095644 H -2.950259 2.086546 -1.196298 H -4.699214 1.964054 -0.998460 H -3.850403 0.812276 -2.031887 C -3.608838 0.456320 0.120116 C -2.366939 -0.479377 0.138814 C -1.073865 0.381756 0.100258 C 0.259783 -0.365383 0.269093 C 1.516219 0.498612 0.020216 C 2.776311 -0.392510 0.022513 C 4.072847 0.291883 -0.433484 C 5.259614 -0.675471 -0.506023 H 5.062976 -1.493106 -1.210565 H 5…	0	0	0	0	0	5	0	0	0	0	0	0	0	5	0	1	1	6	0
383	3346	CCCCCC(C)(C)[C@H](C)CC	C12H26	38	-72.0181	C 3.693389 -1.912365 -0.647990 H 3.571681 -2.643113 0.159250 H 4.759510 -1.881828 -0.901350 H 3.155189 -2.294805 -1.524288 C 3.185341 -0.518458 -0.254979 C 1.677262 -0.473466 0.097872 C 1.050376 0.964306 -0.013440 C -0.437228 0.974488 0.445534 C -1.414618 0.043797 -0.288818 C -2.853237 0.172519 0.232318 C -3.851292 -0.743822 -0.487216 C -5.284057 -0.608702 0.038579 H -5.654809 0.416963 -0.080291 …	0	0	0	0	0	5	0	0	0	0	0	0	0	5	0	1	1	7	0
384	3347	CCCC[C@@H](C)[C@@H](C)[C@H](C)CC	C12H26	38	-70.3549	C 4.747611 -0.285518 -0.720288 H 5.140161 -0.615430 0.248015 H 5.536730 0.295934 -1.211022 H 4.568683 -1.181220 -1.328365 C 3.467458 0.546347 -0.569817 C 2.280773 -0.224094 0.053893 C 0.923462 0.499135 -0.204656 C -0.335164 -0.354564 0.153440 C -1.619967 0.259094 -0.456879 C -2.935210 -0.230243 0.168039 C -4.177337 0.418473 -0.458074 C -5.490482 -0.057937 0.171346 H -5.521873 0.170564 1.243906 H …	0	0	0	0	0	5	0	0	0	0	0	0	0	4	0	3	0	6	0
385	3348	CCC[C@H](C)C[C@@H](C)[C@H](C)CC	C12H26	38	-71.8542	C 4.803377 0.003087 -0.970426 H 5.162036 -0.964236 -0.602027 H 5.643983 0.704531 -0.916481 H 4.542258 -0.120652 -2.029076 C 3.606770 0.521617 -0.162754 C 2.337290 -0.353289 -0.260782 C 1.083409 0.392970 0.288273 C -0.222304 -0.291883 -0.173410 C -1.548578 0.449184 0.112218 C -2.735656 -0.439295 -0.319141 C -4.123684 0.054098 0.113465 C -5.243248 -0.923463 -0.261343 H -5.088872 -1.902890 0.208194 …	0	0	0	0	0	5	0	0	0	0	0	0	0	4	0	3	0	6	0
386	3349	CCCCC(C)(C)C[C@H](C)CC	C12H26	38	-71.8551	C 4.789960 -0.842795 0.070771 H 5.322664 0.052479 -0.267601 H 5.389632 -1.711337 -0.225103 H 4.762021 -0.818095 1.167749 C 3.376718 -0.930501 -0.516097 C 2.407009 0.183995 -0.065439 C 0.982936 -0.073294 -0.632635 C -0.230225 0.092288 0.330087 C -1.506796 -0.097726 -0.537644 C -2.868059 -0.051810 0.172628 C -4.043721 -0.232091 -0.798843 C -5.410179 -0.192614 -0.107084 H -5.567926 0.764636 0.405179…	0	0	0	0	0	5	0	0	0	0	0	0	0	5	0	1	1	6	1
387	3350	CCC[C@H](C)[C@H](C)C[C@H](C)CC	C12H26	38	-72.0943	C -3.816448 1.844421 0.148828 H -4.392019 1.374866 0.953974 H -4.528353 2.374979 -0.493959 H -3.158921 2.595352 0.604876 C -3.009535 0.821375 -0.659305 C -1.907439 0.083674 0.131848 C -1.030953 -0.729382 -0.845611 C 0.173568 -1.507559 -0.266035 C 1.173586 -0.625871 0.539668 C 1.906583 0.422066 -0.325663 C 2.655708 1.502061 0.470163 C 3.296687 2.564457 -0.429477 H 2.541542 3.078100 -1.037448 H 4.0…	0	0	0	0	0	5	0	0	0	0	0	0	0	4	0	3	0	6	0
388	3351	CC[C@@H](C)C[C@@H](C)C[C@H](C)CC	C12H26	38	-73.1946	C 4.457032 -1.513057 -0.380266 H 4.702894 -1.666317 0.676191 H 5.402907 -1.476808 -0.932990 H 3.906007 -2.397294 -0.724793 C 3.644006 -0.232898 -0.606129 C 2.246953 -0.219547 0.051681 C 1.458104 1.011838 -0.444923 C -0.002221 1.178311 0.033825 C -0.882826 -0.009057 -0.410553 C -2.369883 0.014471 0.007113 C -3.097443 -1.198841 -0.611368 C -4.623614 -1.186308 -0.464367 H -5.054495 -0.272233 -0.8921…	0	0	0	0	0	5	0	0	0	0	0	0	0	4	0	3	0	6	0
389	3352	CCCC(C)(C)CC[C@H](C)CC	C12H26	38	-73.9649	C 3.848064 -0.526242 -1.375325 H 4.163275 -1.426553 -0.832907 H 4.689742 -0.204582 -1.999490 H 3.034522 -0.813888 -2.050076 C 3.434336 0.586155 -0.404233 C 2.322490 0.209663 0.599187 C 0.977467 -0.065136 -0.108656 C -0.123817 -0.615358 0.812412 C -1.445522 -1.070878 0.132797 C -2.092244 0.058924 -0.713618 C -2.428196 1.374187 0.005014 C -3.083851 2.396679 -0.930836 H -4.020940 2.008209 -1.348611 …	0	0	0	0	0	5	0	0	0	0	0	0	0	5	0	1	1	6	0
390	3353	CC[C@@H](C)CC[C@H](C)[C@H](C)CC	C12H26	38	-71.851	C 4.941833 -1.019179 -0.264700 H 5.321772 -0.712896 0.716002 H 5.770194 -0.931470 -0.977157 H 4.672035 -2.080890 -0.199706 C 3.745100 -0.171686 -0.712624 C 2.483153 -0.303124 0.166028 C 1.294934 0.418890 -0.504374 C -0.068155 0.190247 0.169983 C -1.271193 0.731143 -0.634647 C -2.647910 0.223798 -0.110334 C -2.844481 -1.285351 -0.374562 C -4.287420 -1.778024 -0.206067 H -4.974932 -1.217026 -0.8516…	0	0	0	0	0	5	0	0	0	0	0	0	0	4	0	3	0	6	0
391	3354	CC[C@@H](C)CCCC(C)(C)CC	C12H26	38	-73.5352	C 5.262980 0.312453 -0.454385 H 5.617244 -0.299962 0.381902 H 5.997936 1.111042 -0.607909 H 5.266446 -0.317853 -1.352691 C 3.869249 0.896521 -0.194917 C 2.735543 -0.142984 -0.067855 C 1.367767 0.570213 -0.025810 C 0.139457 -0.349773 -0.105347 C -1.173476 0.446809 -0.181854 C -2.496177 -0.365726 -0.214882 C -3.693975 0.606539 -0.410795 C -3.922965 1.670341 0.671034 H -3.076787 2.360169 0.759749 H …	0	0	0	0	0	5	0	0	0	0	0	0	0	5	0	1	1	6	0
392	3355	CCCC[C@@H](C)C(C)(C)CCC	C12H26	38	-71.9764	C -4.289032 -1.559214 -0.315594 H -4.407537 -1.808248 0.746345 H -4.515208 -2.461045 -0.896131 H -5.046244 -0.804854 -0.562899 C -2.875371 -1.043255 -0.610522 C -2.540604 0.222912 0.192906 C -1.143863 0.872258 -0.032355 C 0.018377 -0.139555 0.280411 C 1.430668 0.489590 0.172197 C 2.555834 -0.525210 -0.084059 C 3.944206 0.122346 -0.174518 C 5.065233 -0.886149 -0.446166 H 4.901702 -1.415229 -1.3932…	0	0	0	0	0	5	0	0	0	0	0	0	0	5	0	1	1	7	0
393	3356	CCCCC(C)(C)[C@@H](C)CCC	C12H26	38	-72.0383	C -4.608609 -1.061255 -0.506811 H -5.090519 -0.560079 0.341805 H -5.135663 -2.007081 -0.677444 H -4.761137 -0.430686 -1.391603 C -3.117120 -1.291494 -0.240065 C -2.342987 0.016742 -0.013725 C -0.832800 -0.178983 0.273570 C 0.039380 1.084207 -0.066717 C 1.527845 0.875012 0.338625 C 2.274643 -0.314230 -0.284454 C 3.739040 -0.393777 0.170925 C 4.500264 -1.572303 -0.444652 H 4.513516 -1.507251 -1.539…	0	0	0	0	0	5	0	0	0	0	0	0	0	5	0	1	1	7	0
394	3357	CCC[C@H](C)[C@@H](C)[C@@H](C)CCC	C12H26	38	-70.3037	C 5.005483 -0.476046 -0.898282 H 5.270377 -1.228568 -0.145183 H 5.891984 0.143971 -1.074831 H 4.779920 -1.008440 -1.830667 C 3.812342 0.369937 -0.440464 C 2.548375 -0.466994 -0.191751 C 1.306622 0.354346 0.226412 C -0.014879 -0.443848 0.004218 C -1.311998 0.414332 0.150952 C -2.546369 -0.332163 -0.413002 C -3.905577 0.215325 0.048794 C -5.087791 -0.574930 -0.523288 H -5.041018 -1.630210 -0.226836…	0	0	0	0	0	5	0	0	0	0	0	0	0	4	0	3	0	6	0
395	3358	CCC[C@H](C)CC(C)(C)CCC	C12H26	38	-71.7938	C -4.937460 -1.292813 -0.084355 H -5.074795 -1.443118 -1.162410 H -5.917202 -1.054534 0.345491 H -4.609554 -2.248856 0.342267 C -3.918273 -0.182235 0.193908 C -2.534908 -0.484620 -0.397938 C -1.424357 0.531760 -0.053216 C -0.055146 0.049691 -0.609792 C 1.187731 0.139142 0.324714 C 2.412863 -0.284169 -0.534349 C 3.782912 -0.352912 0.157205 C 4.898520 -0.765080 -0.810976 H 4.988877 -0.051703 -1.639…	0	0	0	0	0	5	0	0	0	0	0	0	0	5	0	1	1	6	1
396	3359	CCCC[C@@H](CCC)CC(C)C	C12H26	38	-71.7117	C -2.285703 3.700235 0.108675 H -2.128129 4.038632 -0.922920 H -2.218026 4.578513 0.760975 H -3.310326 3.313738 0.175539 C -1.262434 2.629430 0.502460 C -1.339953 1.375364 -0.380142 C -0.317923 0.268158 -0.035490 C 1.101701 0.651799 -0.513108 C 2.244013 -0.125371 0.156474 C 3.632720 0.272329 -0.361547 C 4.773655 -0.489977 0.320090 H -1.422500 2.339344 1.550806 H -0.254400 3.062670 0.458576 H 4.67…	0	0	0	0	0	4	0	0	0	0	0	0	0	6	0	2	0	4	0
397	3360	CCCC[C@@H](CCC)[C@H](C)CC	C12H26	38	-70.3827	C 2.601494 3.429106 -0.090127 H 2.484150 3.703321 0.965617 H 2.589034 4.354458 -0.677567 H 3.593994 2.975593 -0.204203 C 1.497032 2.465957 -0.538342 C 1.495878 1.147993 0.250862 C 0.376296 0.160333 -0.156449 C -0.990604 0.606804 0.414169 C -2.218713 -0.002134 -0.278144 C -3.548851 0.498820 0.300814 C -4.775365 -0.098595 -0.396479 H 1.619073 2.241947 -1.607720 H 0.523860 2.965775 -0.442924 H -4.78…	0	0	0	0	0	4	0	0	0	0	0	0	0	6	0	2	0	5	0
398	3361	CCCC[C@@H](CCC)C(C)(C)C	C12H26	38	-71.2943	C 1.256751 3.669731 0.181880 H 0.391333 3.974510 0.783630 H 1.451577 4.464786 -0.547112 H 2.122124 3.615688 0.854306 C 1.006151 2.325132 -0.508295 C 0.710811 1.187259 0.480917 C 0.447678 -0.199549 -0.179492 C -0.895603 -0.782747 0.322769 C -2.130229 -0.052136 -0.226652 C -3.454815 -0.607510 0.313557 C -4.686004 0.108002 -0.251921 H 1.875071 2.064371 -1.126301 H 0.159804 2.422222 -1.203121 H -4.72…	0	0	0	0	0	5	0	0	0	0	0	0	0	5	0	1	1	6	0
399	3362	CCCCC(C)(CCC)CCC	C12H26	38	-72.4544	C 4.119743 -1.258842 -0.832638 H 4.006297 -2.343239 -0.954052 H 5.122151 -1.071632 -0.430632 H 4.072372 -0.809089 -1.832236 C 3.032784 -0.686840 0.085628 C 1.620257 -0.931482 -0.466644 C 0.413495 -0.451288 0.390652 C -0.866776 -0.769899 -0.434872 C -2.220849 -0.344609 0.152716 C -3.403593 -0.764225 -0.732435 C -4.762381 -0.338472 -0.166989 H 3.205956 0.389406 0.215501 H -4.822538 0.751470 -0.0572…	0	0	0	0	0	4	0	0	0	0	0	0	0	7	0	0	1	6	0
400	3363	CCC[C@H](C)C(CCC)CCC	C12H26	38	-70.3419	C 2.138470 3.637781 -0.080264 H 1.225662 4.241048 0.000942 H 2.824411 4.161554 -0.756029 H 2.604793 3.610940 0.912403 C 1.826015 2.224536 -0.583802 C 0.850634 1.466224 0.329033 C 0.533972 0.023605 -0.132611 C -0.824896 -0.506232 0.420197 C -2.022363 0.133208 -0.316802 C -3.388037 -0.501856 -0.015716 C -4.517515 0.091613 -0.865066 H 2.764585 1.663414 -0.684963 H -4.326621 -0.051882 -1.935833 H -4.…	0	0	0	0	0	4	0	0	0	0	0	0	0	6	0	2	0	5	0
401	3364	CCCC(CCC)C[C@H](C)CC	C12H26	38	-71.4947	C 4.080060 -1.924956 -0.464851 H 4.157277 -1.653944 -1.525147 H 4.395434 -2.969969 -0.365062 H 4.798474 -1.305673 0.086518 C 2.654011 -1.717910 0.057311 C 2.182964 -0.260755 -0.062140 C 0.781412 0.027957 0.524229 C -0.329401 -0.626818 -0.328053 C -1.785483 -0.468741 0.162592 C -2.747484 -1.098477 -0.868036 C -4.235758 -0.824000 -0.621771 H 2.602298 -2.027919 1.111040 H -4.436758 0.253850 -0.57622…	0	0	0	0	0	4	0	0	0	0	0	0	0	6	0	2	0	5	0
402	3365	CCCC(CCC)CCC(C)C	C12H26	38	-71.6718	C 2.380055 3.614560 0.101649 H 1.466768 4.216709 0.017879 H 3.169839 4.128056 -0.458730 H 2.673270 3.606419 1.158774 C 2.155946 2.191695 -0.421818 C 1.042535 1.447422 0.329397 C 0.783217 0.001114 -0.150144 C -0.606385 -0.499054 0.308159 C -1.791671 0.102963 -0.462183 C -3.174411 -0.459912 -0.073772 C -4.252136 0.043349 -1.046013 H 3.098535 1.632337 -0.355731 H -4.014362 -0.226644 -2.081970 H -4.3…	0	0	0	0	0	4	0	0	0	0	0	0	0	6	0	2	0	4	0
403	3366	CCCC[C@@H](CC(C)C)C(C)C	C12H26	38	-72.125	C 2.626293 -1.409313 1.442450 H 3.482342 -0.727882 1.536148 H 2.956721 -2.403168 1.767355 H 1.855886 -1.072612 2.144734 C 2.116918 -1.445658 -0.007036 C 1.602172 -0.067619 -0.479930 C 0.266688 0.403071 0.145848 C -0.927719 -0.329283 -0.509906 C -2.245010 -0.275919 0.277521 C -3.380478 -1.062041 -0.392085 C -4.693774 -1.017411 0.395743 H 1.284808 -2.163937 -0.053328 H -5.051114 0.013211 0.512975 H…	0	0	0	0	0	5	0	0	0	0	0	0	0	4	0	3	0	5	0
404	3367	CCCC[C@H](C(C)C)[C@H](C)CC	C12H26	38	-70.1955	C -2.540800 -2.868191 -0.658268 H -2.989814 -3.109803 0.311366 H -2.251185 -3.815279 -1.128056 H -3.321325 -2.414116 -1.281778 C -1.330278 -1.935943 -0.519396 C -1.661588 -0.533148 0.038915 C -0.468835 0.451144 -0.157849 C 0.805825 0.006634 0.622055 C 2.048919 -0.200402 -0.257064 C 3.295066 -0.615377 0.535192 C 4.527794 -0.836181 -0.347686 H -0.868671 -1.814191 -1.509504 H 4.791199 0.076688 -0.89…	0	0	0	0	0	5	0	0	0	0	0	0	0	4	0	3	0	6	0
405	3368	CCCC[C@@](C)(CCC)C(C)C	C12H26	38	-71.5328	C -1.370990 3.555817 -0.525855 H -0.936846 3.573907 -1.533341 H -1.121727 4.505870 -0.039266 H -2.461496 3.514608 -0.638200 C -0.849826 2.360489 0.281371 C -1.176422 1.019963 -0.397278 C -0.813008 -0.286688 0.371884 C 0.660153 -0.234867 0.872100 C 1.765671 -0.123134 -0.188719 C 3.167910 -0.022693 0.429065 C 4.282911 0.084732 -0.616201 H -1.285388 2.392520 1.288554 H 4.151204 0.972871 -1.246683 H …	0	0	0	0	0	5	0	0	0	0	0	0	0	5	0	1	1	8	0
406	3369	CCC[C@H](C)[C@@H](CCC)C(C)C	C12H26	38	-70.2255	C 1.849686 3.430693 0.264021 H 1.044851 3.808309 0.907112 H 2.098582 4.219609 -0.455146 H 2.729839 3.269666 0.899120 C 1.433031 2.137581 -0.443782 C 1.061796 1.009284 0.531165 C 0.653446 -0.328688 -0.156350 C -0.778631 -0.793897 0.248468 C -1.849056 0.225611 -0.203358 C -3.294949 -0.291675 -0.159098 C -4.304431 0.723537 -0.706456 H 2.244523 1.803603 -1.104140 H -4.085119 0.977970 -1.750848 H -4.2…	0	0	0	0	0	5	0	0	0	0	0	0	0	4	0	3	0	6	0
407	3370	CCC[C@H](C[C@H](C)CC)C(C)C	C12H26	38	-71.4529	C 3.570412 -2.366168 -0.357462 H 3.530704 -2.439810 -1.451336 H 3.750105 -3.372772 0.037454 H 4.439357 -1.747608 -0.100417 C 2.277028 -1.766435 0.204514 C 2.001605 -0.346386 -0.311967 C 0.684193 0.276181 0.207091 C -0.538646 -0.315130 -0.535810 C -1.900849 -0.205574 0.186720 C -3.050042 -0.454150 -0.813317 C -4.460973 -0.248032 -0.249861 H 2.331626 -1.743108 1.302298 H -4.573881 0.757007 0.176302…	0	0	0	0	0	5	0	0	0	0	0	0	0	4	0	3	0	6	0
408	3371	CCC[C@H](CCC(C)C)C(C)C	C12H26	38	-72.0523	C 3.050120 2.955152 0.158101 H 2.246751 3.702277 0.167702 H 3.894570 3.381314 -0.395731 H 3.373773 2.806441 1.195773 C 2.575875 1.639194 -0.468394 C 1.383665 1.020609 0.276460 C 0.835947 -0.292310 -0.330707 C -0.599262 -0.579728 0.172382 C -1.680981 0.285581 -0.493685 C -3.127244 -0.027962 -0.058567 C -4.130270 0.728126 -0.943156 H 3.416103 0.933061 -0.496001 H -3.995470 0.480654 -2.002966 H -4.0…	0	0	0	0	0	5	0	0	0	0	0	0	0	4	0	3	0	5	0
409	3372	CCCCCC(C(C)C)C(C)C	C12H26	38	-70.0233	C -2.257701 -2.188003 -1.107621 H -2.372956 -1.817860 -2.133213 H -3.068296 -2.901333 -0.915118 H -1.313378 -2.745632 -1.059585 C -2.280563 -1.034456 -0.088913 C -1.134132 -0.011818 -0.384362 C 0.214618 -0.439412 0.240555 C 1.456644 0.221751 -0.377051 C 2.772403 -0.296708 0.219141 C 4.021208 0.352750 -0.391081 C 5.330065 -0.171485 0.208533 H 5.430678 -1.253238 0.056030 H 5.373623 0.014414 1.28887…	0	0	0	0	0	5	0	0	0	0	0	0	0	4	0	3	0	5	0
410	3373	CCCCC[C@@](C)(CC)C(C)C	C12H26	38	-71.5707	C -1.244505 2.387513 -0.804907 H -0.320021 2.199199 -1.362505 H -1.276369 3.459575 -0.578028 H -2.083276 2.172025 -1.475860 C -1.311102 1.568203 0.490827 C -1.221062 0.020577 0.352866 C 0.142002 -0.391690 -0.282021 C 1.421195 0.200224 0.332713 C 2.695506 -0.382347 -0.295785 C 3.988897 0.205876 0.282753 C 5.255671 -0.382497 -0.347039 H 5.282067 -0.200259 -1.428558 H 5.307009 -1.467688 -0.194412 H …	0	0	0	0	0	5	0	0	0	0	0	0	0	5	0	1	1	8	0
411	3374	CC[C@H](CCCC(C)C)C(C)C	C12H26	38	-72.1451	C 2.827135 2.527088 -0.257555 H 3.838552 2.107089 -0.291353 H 2.893017 3.492349 0.257833 H 2.516203 2.723723 -1.291297 C 1.832803 1.597343 0.449094 C 1.616476 0.228076 -0.236660 C 0.332105 -0.455347 0.289911 C -0.972498 0.121265 -0.282425 C -2.224995 -0.559612 0.287796 C -3.562315 -0.110668 -0.334894 C -4.714536 -0.990904 0.172522 H -4.835192 -0.890332 1.259284 H -4.534397 -2.050594 -0.044853 H -…	0	0	0	0	0	5	0	0	0	0	0	0	0	4	0	3	0	5	0
412	3375	CCCCCC(CC)(CC)CC	C12H26	38	-70.6972	C -2.995391 -0.835476 1.815726 H -3.239894 0.152774 2.219922 H -3.057753 -1.549201 2.645535 H -3.777779 -1.102982 1.097069 C -1.593298 -0.876534 1.190705 C -1.317018 0.090424 0.002564 C 0.097121 -0.212640 -0.572825 C 1.308303 0.046753 0.338230 C 2.638926 -0.307879 -0.341166 C 3.866356 -0.055473 0.543861 C 5.189711 -0.411574 -0.141307 H 5.333683 0.177268 -1.055709 H 5.217118 -1.471224 -0.424097 H …	0	0	0	0	0	4	0	0	0	0	0	0	0	7	0	0	1	8	0
413	3376	CCCC[C@H](CC)C(CC)CC	C12H26	38	-68.4624	C -2.862131 -1.580803 -1.673344 H -3.765243 -1.487374 -1.060694 H -2.896279 -2.557648 -2.170583 H -2.913461 -0.810303 -2.452717 C -1.583841 -1.427876 -0.837733 C -1.462858 -0.062454 -0.099788 C -0.053709 0.571582 -0.312313 C 1.069429 -0.245079 0.371120 C 2.475406 -0.015878 -0.204206 C 3.555580 -0.859224 0.486551 C 4.956513 -0.641270 -0.094320 H 5.266476 0.406856 0.000497 H 4.988309 -0.899132 -1.1…	0	0	0	0	0	4	0	0	0	0	0	0	0	6	0	2	0	6	0
414	3377	CCC[C@@H](CC)CC(CC)CC	C12H26	38	-70.3928	C -3.097874 0.993925 -1.787758 H -3.420854 1.763772 -1.075889 H -3.908165 0.851726 -2.512182 H -2.236028 1.392162 -2.335107 C -2.769975 -0.318382 -1.065488 C -1.632525 -0.216026 -0.024686 C -0.253527 -0.091626 -0.713994 C 0.876105 0.519605 0.148496 C 2.268101 0.122287 -0.391805 C 2.688453 -1.325196 -0.099208 C 4.064681 -1.675275 -0.675552 H 4.843804 -1.017740 -0.270187 H 4.076707 -1.565989 -1.767…	0	0	0	0	0	4	0	0	0	0	0	0	0	6	0	2	0	6	0
415	3378	CCC(CC)CCC(CC)CC	C12H26	38	-69.6796	C 3.620518 -1.979860 0.343189 H 4.518759 -1.364348 0.219917 H 3.859929 -2.983888 -0.025889 H 3.420787 -2.060685 1.418953 C 2.410641 -1.396863 -0.397164 C 1.992944 0.019414 0.059679 C 0.554132 0.354067 -0.397712 C -0.554134 -0.354090 0.397705 C -1.992945 -0.019415 -0.059676 C -2.410631 1.396852 0.397209 C -3.620498 1.979883 -0.343133 H -4.518743 1.364370 -0.219891 H -3.420758 2.060744 -1.418893 H …	0	0	0	0	0	4	0	0	0	0	0	0	0	6	0	2	0	6	0
416	3379	CCCCC[C@H](CC)C(C)(C)C	C12H26	38	-71.0241	C -2.147598 -1.873211 -1.080544 H -2.003690 -1.484674 -2.096651 H -3.051931 -2.493880 -1.088603 H -1.305236 -2.533925 -0.851708 C -2.295827 -0.722137 -0.060676 C -1.047422 0.230818 -0.139176 C 0.275461 -0.458583 0.275949 C 1.531984 0.242575 -0.262709 C 2.839338 -0.415699 0.197570 C 4.097804 0.266984 -0.353792 C 5.398737 -0.394840 0.112046 H 5.444976 -1.444302 -0.204299 H 5.483402 -0.376324 1.2057…	0	0	0	0	0	5	0	0	0	0	0	0	0	5	0	1	1	6	0
417	3380	CCCC[C@H](C)[C@H](CC)C(C)C	C12H26	38	-69.7178	C -3.802132 0.095682 -0.618371 H -4.026443 0.938225 0.046696 H -4.691465 -0.545757 -0.640485 H -3.655984 0.497544 -1.628479 C -2.572014 -0.701181 -0.151197 C -1.265804 0.142620 -0.247043 C 0.036324 -0.679109 0.006757 C 1.287481 0.149564 -0.372444 C 2.619980 -0.387899 0.171166 C 3.819402 0.497085 -0.195103 C 5.149588 -0.030354 0.352479 H 5.368398 -1.033123 -0.035062 H 5.128923 -0.097467 1.447313 H…	0	0	0	0	0	5	0	0	0	0	0	0	0	4	0	3	0	6	0
418	3381	CCC[C@@H](C)C[C@H](CC)C(C)C	C12H26	38	-71.4952	C 2.774640 -1.034505 -1.614350 H 1.958361 -1.695214 -1.929413 H 3.715024 -1.570443 -1.789846 H 2.768471 -0.159397 -2.273860 C 2.647918 -0.645553 -0.131449 C 1.405321 0.240471 0.181486 C 0.080740 -0.379850 -0.326362 C -1.197965 0.073175 0.416888 C -2.445686 -0.242968 -0.434356 C -3.778628 0.272985 0.125894 C -4.955094 0.029751 -0.826036 H -5.085069 -1.040459 -1.029560 H -4.797081 0.531205 -1.78891…	0	0	0	0	0	5	0	0	0	0	0	0	0	4	0	3	0	6	0
419	3382	CC[C@H](C)CC[C@H](CC)C(C)C	C12H26	38	-71.4369	C -3.177969 -1.473693 -1.235275 H -4.093209 -0.923980 -0.984394 H -3.434534 -2.539831 -1.250506 H -2.884891 -1.186259 -2.252323 C -2.046501 -1.200186 -0.230045 C -1.569157 0.282078 -0.277177 C -0.177264 0.482149 0.367481 C 0.988882 -0.180569 -0.383815 C 2.394664 0.208848 0.121593 C 3.471862 -0.345125 -0.834755 C 4.898519 0.147190 -0.564074 H 5.273651 -0.186406 0.409544 H 4.948361 1.243290 -0.5815…	0	0	0	0	0	5	0	0	0	0	0	0	0	4	0	3	0	6	0
420	3383	CCCC[C@H](C)C(C)(CC)CC	C12H26	38	-70.5623	C 2.765735 -1.336796 -1.412589 H 1.896845 -1.909947 -1.754411 H 3.642427 -1.989014 -1.501293 H 2.906742 -0.505276 -2.112051 C 2.609964 -0.850235 0.034568 C 1.401090 0.080990 0.339446 C 0.037907 -0.643658 0.017195 C -1.214572 0.149996 0.473020 C -2.490049 -0.182264 -0.317007 C -3.723693 0.586678 0.174676 C -4.991509 0.271444 -0.625855 H -5.241144 -0.795383 -0.569391 H -4.864312 0.524438 -1.685755 …	0	0	0	0	0	5	0	0	0	0	0	0	0	5	0	1	1	9	0
421	3384	CCC[C@H](C)CC(C)(CC)CC	C12H26	38	-70.9378	C 3.732181 -1.386947 -0.337508 H 4.252066 -0.684333 0.323191 H 4.435380 -1.669700 -1.129488 H 3.516291 -2.290846 0.242602 C 2.465184 -0.775628 -0.950332 C 1.334200 -0.353443 0.031397 C 0.222859 0.308953 -0.836942 C -1.099581 0.734864 -0.137207 C -2.228313 -0.287402 -0.399394 C -3.492440 -0.105782 0.452362 C -4.545438 -1.188390 0.190317 H -4.149412 -2.188236 0.407289 H -4.867313 -1.182218 -0.85848…	0	0	0	0	0	5	0	0	0	0	0	0	0	5	0	1	1	8	1
422	3385	CC[C@@H](C)CCC(C)(CC)CC	C12H26	38	-72.5399	C 3.960513 -1.123772 -0.420715 H 4.434324 -0.137852 -0.483969 H 4.457255 -1.770325 -1.153466 H 4.176228 -1.533350 0.572175 C 2.454684 -1.060722 -0.708351 C 1.577531 -0.221690 0.265447 C 0.124462 -0.282943 -0.290119 C -0.954310 0.511678 0.463485 C -2.370805 0.411691 -0.149529 C -2.985113 -0.991765 0.037019 C -4.296581 -1.228026 -0.722544 H -4.166708 -1.053078 -1.798058 H -5.100847 -0.570759 -0.374…	0	0	0	0	0	5	0	0	0	0	0	0	0	5	0	1	1	8	0
423	3386	CCC(C)(CC)CCCC(C)C	C12H26	38	-73.12	C 3.210999 -1.960735 -0.822164 H 3.326352 -2.540401 0.100060 H 4.098756 -2.147988 -1.437452 H 2.349673 -2.364815 -1.365266 C 3.069857 -0.456958 -0.546496 C 1.856626 -0.003618 0.315358 C 0.537863 -0.337271 -0.435288 C -0.775154 0.135373 0.210285 C -2.007495 -0.315272 -0.589008 C -3.359727 0.215819 -0.072508 C -3.691956 -0.290128 1.339776 H -2.943374 0.020639 2.076360 H -3.744283 -1.387049 1.358472…	0	0	0	0	0	5	0	0	0	0	0	0	0	5	0	1	1	7	0
424	3387	CCCCC(C)(C)C(CC)CC	C12H26	38	-69.8325	C -1.622332 2.589207 -0.813678 H -2.681530 2.553915 -0.535618 H -1.530564 3.273641 -1.665102 H -1.073515 3.031285 0.027441 C -1.068756 1.202328 -1.167618 C -1.127760 0.184556 -0.004387 C -0.314324 -1.132873 -0.280164 C 1.167204 -0.835132 -0.661481 C 1.995908 0.029103 0.300874 C 3.458844 0.168157 -0.145023 C 4.297841 1.036735 0.797827 H 4.314579 0.619050 1.812158 H 3.891998 2.053667 0.866841 H 5.3…	0	0	0	0	0	5	0	0	0	0	0	0	0	5	0	1	1	8	0
425	3388	CCC[C@H](C)[C@H](C)C(CC)CC	C12H26	38	-69.5736	C 3.115540 2.143829 0.139779 H 4.060573 1.604577 0.011728 H 3.317884 3.007236 0.784229 H 2.818672 2.527575 -0.844525 C 2.017036 1.256844 0.741201 C 1.639362 0.030731 -0.125097 C 0.235694 -0.550889 0.227789 C -0.958430 0.415052 -0.067384 C -2.296870 -0.363669 -0.116205 C -3.554748 0.494703 0.084187 C -4.849211 -0.323219 0.017023 H -4.862078 -1.109940 0.781632 H -4.959570 -0.811165 -0.959344 H -5.7…	0	0	0	0	0	5	0	0	0	0	0	0	0	4	0	3	0	7	0
426	3389	CC[C@@H](C)C[C@H](C)C(CC)CC	C12H26	38	-70.9618	C -3.181542 -2.224919 -0.559286 H -4.112285 -1.659956 -0.684619 H -3.447036 -3.202319 -0.139870 H -2.761961 -2.394838 -1.558633 C -2.176784 -1.494765 0.341208 C -1.757547 -0.100036 -0.181253 C -0.392875 0.385549 0.399835 C 0.787547 -0.346525 -0.277634 C 2.214740 0.102399 0.107818 C 3.246962 -0.803439 -0.598224 C 4.697923 -0.617919 -0.138551 H 4.791615 -0.767000 0.944603 H 5.080850 0.381966 -0.370…	0	0	0	0	0	5	0	0	0	0	0	0	0	4	0	3	0	7	0
427	3390	CCC(CC)[C@@H](C)CCC(C)C	C12H26	38	-71.5077	C 3.114516 2.287076 -0.502624 H 4.076149 1.794444 -0.686006 H 3.328294 3.257340 -0.039383 H 2.651190 2.479521 -1.478303 C 2.191307 1.444966 0.387462 C 1.840591 0.056221 -0.198206 C 0.533580 -0.544620 0.403293 C -0.722745 0.160517 -0.155832 C -2.052083 -0.523569 0.201160 C -3.283523 0.022789 -0.549952 C -3.568885 1.496000 -0.219751 H -2.733710 2.149273 -0.493977 H -3.755934 1.625307 0.854801 H -4.…	0	0	0	0	0	5	0	0	0	0	0	0	0	4	0	3	0	6	0
428	3391	CCCC(C)(C)CC(CC)CC	C12H26	38	-71.6054	C -2.436329 2.492373 0.150385 H -2.607479 2.385344 1.228760 H -3.113982 3.271626 -0.217326 H -1.411870 2.857632 0.014961 C -2.677311 1.165492 -0.578265 C -1.752053 0.008409 -0.135897 C -0.302253 0.221742 -0.652863 C 0.883638 -0.097646 0.306561 C 2.181425 0.068205 -0.534422 C 3.527882 -0.121853 0.180405 C 4.716986 0.052103 -0.772305 H 4.722605 1.053028 -1.221483 H 4.679067 -0.676245 -1.591857 H 5.…	0	0	0	0	0	5	0	0	0	0	0	0	0	5	0	1	1	7	1
429	3392	CC[C@@H](C)[C@@H](C)CC(CC)CC	C12H26	38	-70.7277	C -2.753076 2.361985 0.479677 H -3.086812 2.065123 1.481747 H -3.428929 3.148562 0.124604 H -1.757574 2.808413 0.583167 C -2.754407 1.163210 -0.476489 C -1.821569 0.004112 -0.059421 C -0.336582 0.367175 -0.302140 C 0.687053 -0.452626 0.519124 C 2.082501 -0.505725 -0.171031 C 2.767849 0.873682 -0.280025 C 3.996557 0.898308 -1.198731 H 3.742416 0.550596 -2.208101 H 4.805560 0.262363 -0.823121 H 4.3…	0	0	0	0	0	5	0	0	0	0	0	0	0	4	0	3	0	7	0
430	3393	CCC(CC)C[C@H](C)CC(C)C	C12H26	38	-72.4331	C 3.350491 -2.113708 0.149648 H 3.545042 -1.956860 1.217930 H 4.205517 -2.658977 -0.266494 H 2.474476 -2.766878 0.066859 C 3.147136 -0.776672 -0.573108 C 1.957459 0.063080 -0.055233 C 0.610107 -0.544683 -0.510599 C -0.640078 -0.122302 0.295382 C -1.912870 -0.465250 -0.509276 C -3.271173 -0.073948 0.108738 C -4.418250 -0.568827 -0.786190 H -4.366454 -1.653487 -0.939639 H -4.379686 -0.091282 -1.774…	0	0	0	0	0	5	0	0	0	0	0	0	0	4	0	3	0	6	0
431	3394	CCC(CC)CCC(C)(C)CC	C12H26	38	-72.9952	C -2.992927 2.288029 -0.203252 H -3.258668 2.365976 0.858333 H -3.768300 2.807495 -0.778172 H -2.055654 2.836776 -0.349452 C -2.880201 0.820600 -0.634083 C -1.810012 0.003948 0.124900 C -0.383614 0.396834 -0.328025 C 0.720101 0.008439 0.669127 C 2.180297 0.374161 0.284324 C 2.610234 -0.258519 -1.067335 C 2.499670 -1.784116 -1.184029 H 1.465398 -2.130243 -1.077066 H 3.102798 -2.299784 -0.428564 H …	0	0	0	0	0	5	0	0	0	0	0	0	0	5	0	1	1	7	0
432	3395	CCC(CC)CC[C@@H](C)C(C)C	C12H26	38	-71.2612	C -3.253470 2.167656 0.576553 H -3.353864 1.926188 1.642043 H -4.093891 2.815974 0.302782 H -2.335874 2.754860 0.456892 C -3.242226 0.893008 -0.275890 C -2.087168 -0.084189 0.038442 C -0.738213 0.453701 -0.493983 C 0.499888 -0.163542 0.176388 C 1.849399 0.246333 -0.454158 C 3.013586 -0.651767 0.056529 C 3.352243 -0.451033 1.543221 H 2.478213 -0.591765 2.188449 H 3.751298 0.552565 1.733307 H 4.115…	0	0	0	0	0	5	0	0	0	0	0	0	0	4	0	3	0	6	0
433	3396	CCC(CC)CCCC(C)(C)C	C12H26	38	-73.5933	C 3.361907 -2.274491 0.418672 H 3.435228 -2.114943 1.501665 H 4.217520 -2.888933 0.115414 H 2.455906 -2.862248 0.232544 C 3.351822 -0.938010 -0.333278 C 2.180421 0.001332 0.032310 C 0.848091 -0.511695 -0.559320 C -0.417497 0.060334 0.099149 C -1.703214 -0.477276 -0.547728 C -3.055476 0.003920 0.043271 C -4.188409 -0.659279 -0.765644 H -4.131405 -1.753294 -0.704814 H -4.134858 -0.380641 -1.825506 …	0	0	0	0	0	5	0	0	0	0	0	0	0	5	0	1	1	5	0
434	3397	CCCC[C@@H](CC)CC(C)(C)C	C12H26	38	-73.1616	C -2.756761 -2.008834 -0.925855 H -3.266944 -1.475134 -1.737339 H -3.509290 -2.600846 -0.390270 H -2.044720 -2.708202 -1.381604 C -2.043261 -1.026780 0.025721 C -0.971967 -0.259120 -0.799899 C -0.178459 0.877038 -0.096679 C 1.315409 0.843592 -0.493805 C 2.126893 -0.298538 0.132746 C 3.597135 -0.310877 -0.306945 C 4.410526 -1.440056 0.334037 H 3.995690 -2.422732 0.077328 H 4.409508 -1.357668 1.428…	0	0	0	0	0	5	0	0	0	0	0	0	0	5	0	1	1	5	1
435	3398	CCCC[C@@H](CC)[C@@H](C)C(C)C	C12H26	38	-70.6536	C -3.907635 -0.158059 -0.768457 H -3.706016 0.145862 -1.803113 H -4.792198 0.392508 -0.426293 H -4.174227 -1.221198 -0.778553 C -2.705733 0.135265 0.147082 C -1.372757 -0.431768 -0.429947 C -0.097329 0.083205 0.311997 C 1.193684 -0.425636 -0.377137 C 2.513460 -0.004488 0.287478 C 3.736406 -0.707382 -0.318277 C 5.059692 -0.280148 0.324942 H 5.067295 -0.500308 1.399701 H 5.227837 0.797673 0.208207 …	0	0	0	0	0	5	0	0	0	0	0	0	0	4	0	3	0	6	0
436	3399	CCCC[C@@](C)(CC)CC(C)C	C12H26	38	-71.5575	C -3.778454 0.734211 -0.894872 H -3.413256 1.767941 -0.919191 H -4.794480 0.746673 -0.481765 H -3.846747 0.381744 -1.932550 C -2.848895 -0.170752 -0.068919 C -1.414926 -0.184329 -0.667919 C -0.202755 -0.126419 0.309846 C 1.073127 -0.287502 -0.566953 C 2.437447 -0.173555 0.129981 C 3.610753 -0.406435 -0.833124 C 4.980197 -0.290517 -0.155985 H 5.085573 -1.023427 0.653559 H 5.123958 0.705652 0.28059…	0	0	0	0	0	5	0	0	0	0	0	0	0	5	0	1	1	7	1
437	3400	CCC[C@@H](C)[C@@H](CC)CC(C)C	C12H26	38	-71.2299	C -4.078140 -0.453088 -0.852706 H -3.929705 -0.115102 -1.885454 H -5.059899 -0.094949 -0.520285 H -4.111548 -1.550564 -0.863945 C -2.958560 0.054408 0.070049 C -1.587974 -0.418725 -0.461318 C -0.324122 0.041333 0.308916 C 0.976061 -0.528483 -0.346081 C 2.255659 -0.007752 0.349602 C 3.584944 -0.471005 -0.267971 C 4.796437 0.235609 0.351038 H 4.853852 0.050057 1.430874 H 4.740827 1.321652 0.206137 …	0	0	0	0	0	5	0	0	0	0	0	0	0	4	0	3	0	6	0
438	3401	CC[C@H](C)C[C@@H](CC)CC(C)C	C12H26	38	-72.2173	C -2.828585 -0.968463 1.401407 H -2.014964 -0.629852 2.052093 H -3.203445 -1.915097 1.808653 H -3.640165 -0.232047 1.472556 C -2.374517 -1.139052 -0.056839 C -1.822523 0.173320 -0.654049 C -0.469330 0.672159 -0.095413 C 0.697896 -0.177469 -0.651347 C 2.032031 -0.109087 0.125246 C 3.177370 -0.670632 -0.743908 C 4.580096 -0.537465 -0.139454 H 4.693790 -1.129440 0.775141 H 4.805652 0.507099 0.110464…	0	0	0	0	0	5	0	0	0	0	0	0	0	4	0	3	0	6	0
439	3402	CC[C@H](CCC(C)C)CC(C)C	C12H26	38	-72.7276	C -3.463175 -1.879637 -0.896647 H -3.634072 -1.461728 -1.895968 H -4.436039 -2.171557 -0.483174 H -2.866318 -2.793604 -1.016228 C -2.746913 -0.872949 0.017072 C -1.388962 -0.466353 -0.595115 C -0.679917 0.754051 0.037351 C 0.819581 0.778536 -0.339760 C 1.683369 -0.257351 0.396234 C 3.194246 -0.177390 0.095446 C 3.979726 -1.101170 1.038669 H 3.692354 -2.150315 0.888748 H 3.792407 -0.852627 2.09022…	0	0	0	0	0	5	0	0	0	0	0	0	0	4	0	3	0	5	0
440	3403	CCCC[C@@H](CC)C(C)(C)CC	C12H26	38	-70.1639	C -2.802004 -0.125825 1.891097 H -2.339198 -0.948172 2.447865 H -3.816140 0.004600 2.286379 H -2.243530 0.787728 2.123107 C -2.855419 -0.405903 0.383506 C -1.508631 -0.717549 -0.336393 C -0.435111 0.401721 -0.080237 C 0.956999 0.085089 -0.709996 C 2.083606 -0.105792 0.316632 C 3.447991 -0.400609 -0.318964 C 4.567504 -0.587809 0.710359 H 4.347867 -1.422620 1.387429 H 4.694078 0.311283 1.326132 H 5…	0	0	0	0	0	5	0	0	0	0	0	0	0	5	0	1	1	8	0
441	3404	CCCC[C@@](C)(CC)[C@@H](C)CC	C12H26	38	-70.6247	C -3.420140 -1.556814 -1.139159 H -2.952651 -1.581780 -2.131386 H -4.490539 -1.367718 -1.281545 H -3.321370 -2.557109 -0.702845 C -2.784976 -0.471511 -0.259314 C -1.268105 -0.675701 -0.008084 C -0.502758 0.650648 0.370350 C 0.961135 0.345190 0.801637 C 1.876474 -0.333886 -0.228734 C 3.285385 -0.601139 0.320427 C 4.215348 -1.268096 -0.698229 H 4.338931 -0.642945 -1.591277 H 3.815606 -2.235717 -1.0…	0	0	0	0	0	5	0	0	0	0	0	0	0	5	0	1	1	9	0
442	3405	CCC[C@@H](C)[C@@H](CC)[C@@H](C)CC	C12H26	38	-67.7618	C 3.808682 -1.244519 0.556634 H 3.484495 -1.428238 1.588936 H 4.847262 -0.895849 0.594570 H 3.808868 -2.206496 0.033486 C 2.913249 -0.201546 -0.125661 C 1.402258 -0.538674 -0.134814 C 0.560173 0.682353 -0.621718 C -0.942334 0.349133 -0.902088 C -1.751692 -0.127032 0.325060 C -3.063078 -0.849834 -0.022387 C -3.809972 -1.355550 1.216554 H -4.075280 -0.527138 1.885114 H -3.194667 -2.058672 1.791636 …	0	0	0	0	0	5	0	0	0	0	0	0	0	4	0	3	0	7	0
443	3406	CC[C@H](C)C[C@@H](CC)[C@@H](C)CC	C12H26	38	-70.2444	C -3.278623 -2.166758 0.564220 H -4.117123 -1.490161 0.773004 H -3.331312 -2.991012 1.284891 H -3.437187 -2.594006 -0.431901 C -1.935597 -1.433639 0.671638 C -1.811757 -0.179591 -0.221956 C -0.536430 0.646474 0.127287 C 0.770309 -0.018657 -0.373592 C 2.046183 0.372631 0.408008 C 3.329370 0.116001 -0.416532 C 3.585452 -1.340239 -0.827746 H 2.775848 -1.735025 -1.452007 H 3.687168 -1.999568 0.041641…	0	0	0	0	0	5	0	0	0	0	0	0	0	4	0	3	0	7	0
444	3407	CC[C@H](C)[C@H](CC)CCC(C)C	C12H26	38	-71.4138	C 3.693814 -1.986844 -0.597424 H 4.469508 -1.240038 -0.809628 H 3.828338 -2.813628 -1.304442 H 3.880393 -2.382877 0.406729 C 2.290956 -1.380393 -0.728016 C 2.044552 -0.130394 0.145796 C 0.705020 0.573852 -0.229086 C -0.540883 -0.200138 0.266337 C -1.828031 0.116836 -0.512098 C -3.063492 -0.705036 -0.090631 C -3.509526 -0.404819 1.348818 H -3.772689 0.655502 1.461766 H -2.727264 -0.633859 2.080252…	0	0	0	0	0	5	0	0	0	0	0	0	0	4	0	3	0	6	0
445	3408	CCC[C@H](C)[C@@](C)(CC)CCC	C12H26	38	-70.4557	C 3.066518 2.535728 -0.426740 H 2.980117 2.526728 -1.520486 H 4.106534 2.775808 -0.177301 H 2.436957 3.353128 -0.053749 C 2.643682 1.189737 0.174685 C 1.189773 0.832685 -0.176121 C 0.599351 -0.472883 0.437026 C -0.844994 -0.692535 -0.157985 C -1.874727 0.377566 0.289443 C -3.047703 0.566031 -0.685452 C -4.066875 1.601429 -0.197845 H -3.597635 2.582374 -0.051811 H -4.508963 1.301910 0.760489 H -4.…	0	0	0	0	0	5	0	0	0	0	0	0	0	5	0	1	1	9	0
446	3409	CCC[C@](C)(CC)C[C@H](C)CC	C12H26	38	-70.9569	C -4.376377 -0.847154 -0.790486 H -4.504590 -0.049236 -1.532521 H -5.320743 -0.947514 -0.243160 H -4.207736 -1.782277 -1.338786 C -3.210058 -0.541755 0.157275 C -1.877848 -0.392050 -0.593247 C -0.598641 -0.123909 0.250984 C 0.565888 0.071447 -0.766235 C 2.007045 0.245707 -0.207401 C 2.820607 -1.061703 -0.336147 C 4.162967 -1.065433 0.404473 H 4.024205 -0.865477 1.474684 H 4.853460 -0.310018 0.013…	0	0	0	0	0	5	0	0	0	0	0	0	0	5	0	1	1	8	1
447	3410	CCC[C@](C)(CC)CCC(C)C	C12H26	38	-73.5986	C 4.430219 -0.373863 1.207876 H 4.305150 0.422217 1.952418 H 5.452471 -0.307215 0.817964 H 4.335277 -1.332724 1.732406 C 3.393672 -0.251299 0.084289 C 1.953662 -0.335219 0.613086 C 0.795553 -0.264884 -0.423641 C -0.529417 -0.323964 0.392878 C -1.845700 -0.183663 -0.388346 C -3.115099 -0.449534 0.449038 C -4.359067 -0.462757 -0.452234 H -4.267931 -1.209996 -1.249757 H -4.508576 0.515293 -0.928488 …	0	0	0	0	0	5	0	0	0	0	0	0	0	5	0	1	1	7	0
448	3411	CCC[C@H](CC)C(C)(C)CCC	C12H26	38	-70.0986	C 4.114038 -0.558843 -0.888878 H 4.648667 0.079993 -0.174756 H 4.646441 -0.505991 -1.845574 H 4.186150 -1.591289 -0.524469 C 2.652687 -0.123559 -1.035291 C 1.868370 -0.185960 0.284258 C 0.382479 0.274439 0.166094 C -0.653751 -0.853713 0.520629 C -2.124467 -0.377141 0.323621 C -2.514248 0.205527 -1.043391 C -4.009243 0.537330 -1.125362 H -4.296416 1.267937 -0.358871 H -4.623552 -0.358619 -0.972446…	0	0	0	0	0	5	0	0	0	0	0	0	0	5	0	1	1	8	0
449	3412	CCC[C@H](CC)[C@H](C)[C@H](C)CC	C12H26	38	-69.64	C 3.402159 -2.435826 0.337958 H 3.785303 -2.169838 1.330942 H 4.243517 -2.817529 -0.251894 H 2.687661 -3.257886 0.470066 C 2.742005 -1.231231 -0.341600 C 1.547711 -0.678907 0.452236 C 0.841550 0.533777 -0.201678 C -0.625634 0.719996 0.294676 C -1.593838 -0.444798 -0.094675 C -3.071054 0.003269 0.035137 C -4.087247 -1.144158 0.096645 H -3.888596 -1.799597 0.953846 H -4.070633 -1.765629 -0.805424 H…	0	0	0	0	0	5	0	0	0	0	0	0	0	4	0	3	0	7	0
450	3413	CCC[C@H](CC)[C@H](C)CC(C)C	C12H26	38	-71.6654	C 3.841683 -2.184049 -0.037323 H 4.279217 -1.924073 0.934552 H 4.664778 -2.435291 -0.716220 H 3.238854 -3.089699 0.104617 C 2.992392 -1.033510 -0.588036 C 1.815717 -0.666302 0.328863 C 0.951908 0.511676 -0.181295 C -0.498290 0.501000 0.394867 C -1.358650 -0.583055 -0.292440 C -2.855925 -0.634288 0.080070 C -3.533605 -1.814867 -0.633316 H -3.044067 -2.765099 -0.387962 H -3.491683 -1.691366 -1.7236…	0	0	0	0	0	5	0	0	0	0	0	0	0	4	0	3	0	6	0
451	3414	CCC[C@H](CC)CC(C)(C)CC	C12H26	38	-71.7328	C -3.557364 -2.394191 -0.055421 H -4.474104 -1.830276 0.157362 H -3.612312 -3.339319 0.497021 H -3.559268 -2.633673 -1.126050 C -2.310056 -1.591371 0.330086 C -2.208558 -0.251298 -0.411255 C -0.951213 0.585113 -0.079890 C 0.318941 -0.029890 -0.731019 C 1.634515 -0.072193 0.102446 C 2.741854 -0.597969 -0.854854 C 4.143938 -0.798161 -0.264923 H 4.149383 -1.536461 0.544353 H 4.563236 0.133804 0.1300…	0	0	0	0	0	5	0	0	0	0	0	0	0	5	0	1	1	7	1
452	3415	CCC[C@H](CC)C[C@@H](C)C(C)C	C12H26	38	-71.545	C -3.915026 -2.141066 -0.063847 H -4.791132 -1.481772 -0.025557 H -4.131265 -3.018293 0.556771 H -3.806649 -2.484737 -1.100037 C -2.652998 -1.414325 0.413319 C -2.329000 -0.167578 -0.422321 C -1.050437 0.588878 0.002659 C 0.221976 -0.167380 -0.450213 C 1.515945 0.186833 0.319818 C 2.787164 -0.117321 -0.524256 C 2.971598 -1.606614 -0.860405 H 2.094770 -2.025595 -1.366088 H 3.157299 -2.204398 0.040…	0	0	0	0	0	5	0	0	0	0	0	0	0	4	0	3	0	6	0
453	3416	CCC[C@H](CC)CCC(C)(C)C	C12H26	38	-73.5129	C 3.849941 -2.363348 0.033659 H 4.143413 -2.286339 1.087933 H 4.751141 -2.592351 -0.546718 H 3.169038 -3.218848 -0.056934 C 3.184098 -1.071118 -0.451596 C 1.906466 -0.727707 0.327779 C 1.205494 0.578615 -0.108980 C -0.270629 0.603002 0.355181 C -1.203244 -0.280142 -0.489235 C -2.687736 -0.373490 -0.043020 C -3.431418 -1.264165 -1.058677 H -2.993229 -2.269226 -1.100581 H -3.385838 -0.837747 -2.068…	0	0	0	0	0	5	0	0	0	0	0	0	0	5	0	1	1	5	0
454	3417	CCCCCC(C)(C)C(C)(C)C	C12H26	38	-71.988	C -5.326579 -0.575191 -0.056859 H -5.359490 -0.992399 -1.070974 H -6.257877 -0.020306 0.104981 H -5.314548 -1.417665 0.645774 C -4.099080 0.321832 0.133212 C -2.771017 -0.415062 -0.083309 C -1.536136 0.478679 0.101977 C -0.220929 -0.294713 -0.095396 C 1.103827 0.528188 -0.055544 C 2.356879 -0.457269 0.034842 C 3.682808 0.286697 -0.250035 H 3.814321 1.167644 0.387871 H 3.757108 0.611747 -1.292725 …	0	0	0	0	0	6	0	0	0	0	0	0	0	4	0	0	2	8	0
455	3418	CCCC[C@@H](C)[C@@H](C)C(C)(C)C	C12H26	38	-71.4208	C -4.855571 -0.861050 -0.192007 H -5.248178 0.025357 -0.705593 H -5.639715 -1.231651 0.478214 H -4.676958 -1.630742 -0.953110 C -3.570921 -0.532683 0.575695 C -2.443938 -0.009078 -0.324707 C -1.151500 0.305623 0.444137 C -0.003753 0.845923 -0.444191 C 1.425612 0.725171 0.187589 C 2.202659 -0.595011 -0.173927 C 2.498096 -0.620983 -1.690276 H 3.086472 0.254474 -1.992578 H 1.586116 -0.636075 -2.2964…	0	0	0	0	0	6	0	0	0	0	0	0	0	3	0	2	1	7	1
456	3419	CCC[C@H](C)C[C@@H](C)C(C)(C)C	C12H26	38	-73.5342	C 5.061757 -0.498850 0.644271 H 5.114794 0.088325 1.569514 H 6.025358 -0.399028 0.131498 H 4.942723 -1.551667 0.928808 C 3.903466 -0.029538 -0.243152 C 2.538347 -0.154553 0.448003 C 1.314401 0.187887 -0.427362 C 0.008776 -0.108422 0.348167 C -1.269082 -0.228640 -0.520876 C -2.591646 0.098531 0.262121 C -2.617706 1.596502 0.636511 H -2.560070 2.227540 -0.259367 H -1.791766 1.879359 1.297357 H -3.5…	0	0	0	0	0	6	0	0	0	0	0	0	0	3	0	2	1	7	0
457	3420	CC[C@@H](C)CC[C@@H](C)C(C)(C)C	C12H26	38	-73.3592	C -5.053273 0.314668 0.188420 H -5.344934 -0.740544 0.151213 H -5.844097 0.889062 -0.307703 H -5.035932 0.617624 1.243007 C -3.696346 0.564618 -0.480375 C -2.492115 -0.116321 0.204097 C -1.174791 0.387722 -0.422978 C 0.109152 -0.075835 0.284834 C 1.394592 0.598187 -0.260039 C 2.691621 -0.263155 -0.051313 C 2.616476 -1.536500 -0.922002 H 2.514259 -1.281388 -1.984345 H 1.774900 -2.182809 -0.651467 …	0	0	0	0	0	6	0	0	0	0	0	0	0	3	0	2	1	7	0
458	3421	CCCCC(C)(C)CC(C)(C)C	C12H26	38	-71.2579	C 4.676931 -1.238915 0.185747 H 4.785729 -1.064177 1.263364 H 5.678090 -1.205886 -0.259265 H 4.287672 -2.256190 0.054488 C 3.745698 -0.202875 -0.452047 C 2.330059 -0.214178 0.143179 C 1.410009 0.827220 -0.511918 C -0.046196 0.965182 0.031836 C -0.742812 -0.425319 -0.122093 C -2.285413 -0.666163 -0.034106 C -3.024612 -0.200118 -1.307102 H -2.577532 -0.642314 -2.206284 H -3.013954 0.885786 -1.42788…	0	0	0	0	0	6	0	0	0	0	0	0	0	4	0	0	2	6	2
459	3422	CCC[C@H](C)[C@H](C)CC(C)(C)C	C12H26	38	-73.2986	C -4.269702 -1.603703 -0.442049 H -4.669853 -1.021864 -1.281686 H -5.121055 -1.995546 0.126429 H -3.727746 -2.459619 -0.863223 C -3.354206 -0.746718 0.438995 C -2.145852 -0.185695 -0.325989 C -1.160284 0.634069 0.534954 C 0.216095 0.860228 -0.160302 C 1.002256 -0.470563 -0.331848 C 2.495197 -0.482910 0.104213 C 3.077661 -1.867049 -0.246907 H 3.033072 -2.053915 -1.327052 H 2.523116 -2.670123 0.254…	0	0	0	0	0	6	0	0	0	0	0	0	0	3	0	2	1	6	1
460	3423	CC[C@@H](C)C[C@H](C)CC(C)(C)C	C12H26	38	-74.0302	C -4.927658 -0.224102 -0.259048 H -5.142264 -0.441869 0.792890 H -5.673631 -0.756129 -0.860693 H -5.083006 0.851082 -0.414151 C -3.507068 -0.640313 -0.658558 C -2.373990 0.121512 0.062539 C -1.020600 -0.227370 -0.592502 C 0.237728 0.504145 -0.072006 C 1.495735 -0.003963 -0.831464 C 2.783356 -0.277648 -0.004607 C 3.230331 0.962799 0.792301 H 2.484573 1.260228 1.538084 H 3.406788 1.819778 0.130559 …	0	0	0	0	0	6	0	0	0	0	0	0	0	3	0	2	1	6	1
461	3424	CC(C)CC[C@H](C)CC(C)(C)C	C12H26	38	-74.5512	C -3.912449 -0.651179 -1.255751 H -4.168127 0.340082 -1.653717 H -4.808679 -1.278706 -1.330031 H -3.149459 -1.086461 -1.909847 C -3.434170 -0.547086 0.200678 C -2.183743 0.343740 0.349105 C -0.933997 -0.173192 -0.378777 C 0.376718 0.569908 -0.037005 C 1.584552 -0.108905 -0.741008 C 2.883646 -0.318217 0.086791 C 2.636453 -1.320101 1.232538 H 2.287363 -2.285114 0.844274 H 1.886721 -0.954694 1.94362…	0	0	0	0	0	6	0	0	0	0	0	0	0	3	0	2	1	5	1
462	3425	CCCC(C)(C)CCC(C)(C)C	C12H26	38	-76.5582	C -3.131251 2.470629 -0.229654 H -2.634395 2.858810 -1.127528 H -3.259124 3.306582 0.467694 H -4.130358 2.129571 -0.528019 C -2.322885 1.331823 0.403522 C -2.127699 0.151047 -0.559196 C -1.353279 -1.084416 -0.024641 C 0.066276 -0.718654 0.496143 C 1.003823 -0.020223 -0.501715 C 2.440994 0.298291 -0.001627 C 3.190314 1.008179 -1.147434 H 2.688733 1.941853 -1.431244 H 3.243439 0.372934 -2.040469 H …	0	0	0	0	0	6	0	0	0	0	0	0	0	4	0	0	2	6	0
463	3426	CC[C@@H](C)[C@@H](C)CCC(C)(C)C	C12H26	38	-74.1872	C -3.869884 1.827526 -0.203226 H -4.789496 1.331120 0.125324 H -4.136146 2.491523 -1.033769 H -3.518565 2.456637 0.624440 C -2.791383 0.823104 -0.630192 C -2.293149 -0.096758 0.505998 C -0.995472 -0.881670 0.147438 C 0.229889 0.055748 0.035727 C 1.581281 -0.677319 0.061085 C 2.861431 0.202514 0.066289 C 4.081499 -0.740651 0.065102 H 4.086669 -1.381858 -0.825209 H 4.079054 -1.393644 0.946836 H 5.0…	0	0	0	0	0	6	0	0	0	0	0	0	0	3	0	2	1	6	0
464	3427	CCC(C)(C)CCCC(C)(C)C	C12H26	38	-76.6834	C 2.628375 2.177698 -0.026323 H 1.644333 2.370337 0.415890 H 2.854414 3.015693 -0.695841 H 3.366235 2.199582 0.783233 C 2.661547 0.853928 -0.800822 C 2.391782 -0.440767 0.013080 C 1.025873 -0.399072 0.750726 C -0.230505 -0.173998 -0.106223 C -1.508946 -0.186976 0.747369 C -2.859404 0.029631 0.013418 C -3.983989 -0.021071 1.067272 H -3.852504 0.760640 1.825862 H -3.999860 -0.988648 1.584332 H -4.9…	0	0	0	0	0	6	0	0	0	0	0	0	0	4	0	0	2	6	0
465	3428	CC(C)(C)CCCCC(C)(C)C	C12H26	38	-77.46	C -4.301799 1.176764 -0.000030 H -4.175462 1.811412 0.886021 H -5.333769 0.804525 -0.000045 H -4.175447 1.811441 -0.886059 C -3.291674 0.011775 -0.000040 C -1.863184 0.619202 -0.000013 C -0.679299 -0.359274 -0.000029 C 0.679299 0.359274 0.000016 C 1.863184 -0.619202 -0.000012 C 3.291674 -0.011775 0.000042 C 4.301799 -1.176764 -0.000012 H 4.175469 -1.811373 -0.886093 H 4.175440 -1.811480 0.885987 …	0	0	0	0	0	6	0	0	0	0	0	0	0	4	0	0	2	4	0
466	3429	CCCC[C@@H](C)C(C)(C)C(C)C	C12H26	38	-70.495	C -5.110513 0.251899 -0.485723 H -5.258740 1.178981 0.081882 H -6.012342 -0.359391 -0.365597 H -5.031127 0.523557 -1.545652 C -3.859855 -0.494611 -0.010177 C -2.571536 0.325587 -0.159123 C -1.314535 -0.431517 0.297388 C -0.010749 0.405286 0.207175 C 1.293279 -0.464052 0.013933 C 2.573371 0.453460 0.054961 C 3.908408 -0.311199 -0.044755 H 4.030978 -0.806309 -1.015086 H 4.020336 -1.068615 0.736589 …	0	0	0	0	0	6	0	0	0	0	0	0	0	3	0	2	1	9	0
467	3430	CCC[C@H](C)CC(C)(C)C(C)C	C12H26	38	-70.6974	C -4.404236 -1.277559 -0.177582 H -4.559432 -1.309108 -1.263187 H -5.387961 -1.181161 0.296175 H -3.982736 -2.244815 0.123042 C -3.477020 -0.122124 0.215642 C -2.086624 -0.229932 -0.426317 C 0.361740 0.529739 -0.482810 C 1.330253 -0.076600 0.573695 C 2.696745 -0.487339 -0.092660 C 2.604695 -1.686970 -1.054672 H 1.962090 -1.473243 -1.917178 H 2.222955 -2.588656 -0.566828 H 3.600159 -1.926381 -1.44…	0	0	0	0	0	6	0	0	0	0	0	0	0	3	0	2	1	8	1
468	3431	CC[C@@H](C)CCC(C)(C)C(C)C	C12H26	38	-73.3708	C 4.789078 -0.373312 -0.472771 H 5.164633 0.530808 0.018594 H 5.429429 -0.561694 -1.342211 H 4.922638 -1.210243 0.224331 C 3.321711 -0.235867 -0.895887 C 2.317082 -0.072419 0.264427 C -0.211881 -0.222823 0.816189 C -1.668504 -0.531840 0.355948 C -2.153246 0.497911 -0.724658 C -3.576860 0.230511 -1.249086 H -4.332118 0.365301 -0.465763 H -3.691588 -0.778465 -1.656813 H -3.817159 0.935968 -2.053392…	0	0	0	0	0	6	0	0	0	0	0	0	0	3	0	2	1	8	0
469	3432	CCCCC(C)(C)[C@@H](C)C(C)C	C12H26	38	-70.9031	C -4.561176 -1.151563 0.200782 H -4.187291 -2.166918 0.019378 H -5.560288 -1.080636 -0.244373 H -4.670632 -1.029639 1.285563 C -3.612135 -0.099291 -0.381783 C -2.198188 -0.162760 0.214127 C 0.199704 0.964501 0.157366 C 0.941706 -0.406036 -0.067698 C 2.441891 -0.428180 0.389304 C 2.794968 -1.793025 1.007684 H 2.657006 -2.607279 0.284462 H 2.165827 -2.012225 1.878487 H 3.841542 -1.820215 1.334759 C…	0	0	0	0	0	6	0	0	0	0	0	0	0	3	0	2	1	8	1
470	3433	CCC[C@H](C)[C@H](C)[C@@H](C)C(C)C	C12H26	38	-70.6938	C -4.885243 -0.628488 -0.163345 H -4.918886 -0.978118 -1.202670 H -5.832930 -0.119558 0.047206 H -4.832975 -1.515083 0.480811 C -3.687516 0.298863 0.070472 C -2.340792 -0.388805 -0.200146 C 0.192962 -0.364137 0.199147 C 1.527123 0.430889 0.037688 C 2.794274 -0.474681 -0.026331 C 2.671795 -1.609786 -1.058009 H 2.441545 -1.212497 -2.055732 H 1.893044 -2.333896 -0.799578 H 3.616405 -2.161154 -1.1342…	0	0	0	0	0	6	0	0	0	0	0	0	0	2	0	4	0	7	0
471	3434	CC[C@@H](C)C[C@H](C)[C@@H](C)C(C)C	C12H26	38	-72.0059	C 4.840992 -0.042025 0.039548 H 5.052160 0.873489 -0.523514 H 5.650826 -0.749710 -0.172141 H 4.888978 0.206001 1.107566 C 3.480077 -0.645587 -0.327030 C 2.256900 0.221643 0.039167 C -0.327337 0.005509 0.413485 C -1.614625 -0.418088 -0.358969 C -2.909002 0.286687 0.143780 C -2.765382 1.816670 0.227628 H -2.465398 2.237848 -0.741335 H -2.027300 2.131970 0.971544 H -3.721655 2.276520 0.503506 C -4.1…	0	0	0	0	0	6	0	0	0	0	0	0	0	2	0	4	0	7	0
472	3435	CC(C)CC[C@H](C)[C@@H](C)C(C)C	C12H26	38	-72.7958	C -3.865374 1.285380 -0.007667 H -4.051409 1.216183 1.072569 H -4.801402 1.599255 -0.485018 H -3.130329 2.081017 -0.169168 C -3.390358 -0.064851 -0.566424 C -2.084684 -0.553427 0.093983 C 0.470446 -0.248406 0.376294 C 1.708522 0.417978 -0.298975 C 3.055474 -0.300052 0.011450 C 3.001133 -1.816744 -0.243624 H 2.692982 -2.032023 -1.275602 H 2.307452 -2.333694 0.426474 H 3.990657 -2.265252 -0.096239 …	0	0	0	0	0	6	0	0	0	0	0	0	0	2	0	4	0	6	0
473	3436	CCCC(C)(C)C[C@@H](C)C(C)C	C12H26	38	-72.4234	C 4.718214 -1.005581 -0.346551 H 4.561406 -2.036587 -0.005845 H 5.714292 -0.692536 -0.012980 H 4.722793 -1.018531 -1.443548 C 3.628496 -0.071124 0.193032 C 2.224168 -0.496940 -0.261498 C -0.260518 -0.332346 -0.346020 C -1.626670 0.380355 -0.136570 C -2.697670 -0.593884 0.436798 C -3.951164 0.141257 0.936921 H -4.514263 0.594910 0.112563 H -3.692038 0.939242 1.643735 H -4.628942 -0.551441 1.450157…	0	0	0	0	0	6	0	0	0	0	0	0	0	3	0	2	1	7	1
474	3437	CC[C@@H](C)[C@@H](C)C[C@@H](C)C(C)C	C12H26	38	-72.3076	C 4.189327 1.102027 -0.531876 H 4.872349 0.258691 -0.681787 H 4.756176 1.896260 -0.032398 H 3.899684 1.474285 -1.522625 C 2.956303 0.708494 0.292168 C 2.061266 -0.359403 -0.374774 C -0.242706 0.721197 -0.072062 C -1.721743 0.674796 0.381202 C -2.499039 -0.570894 -0.132817 C -3.885888 -0.693982 0.521150 H -4.567949 0.096212 0.185908 H -3.819536 -0.636308 1.614694 H -4.350721 -1.653798 0.265781 C -…	0	0	0	0	0	6	0	0	0	0	0	0	0	2	0	4	0	7	0
475	3438	CC(C)C[C@@H](C)C[C@@H](C)C(C)C	C12H26	38	-74.1849	C -4.449301 -0.361142 -0.630738 H -4.372567 -0.101841 -1.694972 H -5.369459 0.093303 -0.244298 H -4.557803 -1.450227 -0.561539 C -3.216705 0.129925 0.144819 C -1.948037 -0.571861 -0.383343 C 0.536045 -0.961385 -0.427946 C 1.980496 -0.734463 0.075590 C 2.385659 0.765142 0.160649 C 3.733115 0.957866 0.876973 H 4.570999 0.575618 0.282105 H 3.748896 0.443168 1.845678 H 3.924946 2.021632 1.061736 C 2.…	0	0	0	0	0	6	0	0	0	0	0	0	0	2	0	4	0	6	0
476	3439	CCC(C)(C)CC[C@@H](C)C(C)C	C12H26	38	-73.471	C -4.674001 0.425433 -0.123418 H -4.906107 -0.249778 -0.954209 H -5.349028 1.285202 -0.205842 H -4.922877 -0.093659 0.808721 C -3.214495 0.897701 -0.151743 C -2.108567 -0.189036 -0.029265 C 0.533020 -0.275412 0.036797 C 1.836138 0.515333 -0.224738 C 3.053631 -0.438299 -0.401611 C 4.274163 0.281701 -0.997980 H 4.699237 1.012733 -0.299829 H 4.013273 0.813576 -1.921179 H 5.067985 -0.435469 -1.238968…	0	0	0	0	0	6	0	0	0	0	0	0	0	3	0	2	1	7	0
477	3440	CC(C)[C@H](C)CC[C@@H](C)C(C)C	C12H26	38	-72.7677	C 3.419985 -1.488621 -1.045659 H 2.717935 -2.230592 -0.646692 H 4.424923 -1.921219 -0.971341 H 3.192957 -1.352626 -2.110119 C 3.343831 -0.156103 -0.282458 C 1.987995 0.576784 -0.504553 C -0.585248 0.365035 -0.317937 C -1.782318 -0.469355 0.189200 C -3.085657 -0.130764 -0.591382 C -4.188421 -1.176956 -0.360797 H -4.562884 -1.155699 0.669676 H -3.825603 -2.192037 -0.563758 H -5.044383 -0.990355 -1.…	0	0	0	0	0	6	0	0	0	0	0	0	0	2	0	4	0	6	0
478	3441	CC(C)[C@H](C)CCCC(C)(C)C	C12H26	38	-75.1424	C 4.213976 -1.198280 -0.139855 H 4.091638 -1.975201 0.625155 H 5.240040 -0.816842 -0.067592 H 4.103396 -1.675915 -1.121418 C 3.185918 -0.064362 0.047478 C 1.767234 -0.683666 -0.067341 C -0.774482 -0.474641 -0.042894 C -2.024568 0.402256 0.189515 C -3.295173 -0.465540 0.423637 C -4.468292 0.358661 0.978636 H -4.853867 1.070334 0.238833 H -4.171701 0.928485 1.867815 H -5.301092 -0.295299 1.263819 C…	0	0	0	0	0	6	0	0	0	0	0	0	0	3	0	2	1	5	0
479	3442	CCC[C@H](C)C(C)(C)CC(C)C	C12H26	38	-70.6745	C 3.850571 -2.030686 0.045698 H 4.290005 -1.713077 0.999411 H 4.667403 -2.376813 -0.598075 H 3.201982 -2.891171 0.252278 C 3.065921 -0.889313 -0.610058 C 1.898893 -0.390695 0.256141 C -0.378559 0.890423 0.137031 C -1.173999 -0.286807 -0.508927 C -2.637141 -0.530473 -0.049025 C -3.513528 -0.951015 -1.240799 H -3.131972 -1.871958 -1.701318 H -3.532248 -0.175762 -2.015979 H -4.547702 -1.140999 -0.92…	0	0	0	0	0	6	0	0	0	0	0	0	0	3	0	2	1	8	1
480	3443	CC[C@@H](C)CC(C)(C)CC(C)C	C12H26	38	-71.2532	C 3.720816 -1.866878 -0.062779 H 4.505988 -1.347937 0.497550 H 4.216016 -2.539014 -0.773065 H 3.161940 -2.489598 0.647587 C 2.790930 -0.891392 -0.792918 C 1.949556 0.025354 0.121949 C -0.505829 1.006633 -0.238946 C -1.196519 -0.379721 -0.395633 C -2.654341 -0.535375 0.116701 C -3.469983 -1.426400 -0.834886 H -3.021224 -2.425279 -0.916407 H -3.513111 -0.998791 -1.843621 H -4.499413 -1.554085 -0.47…	0	0	0	0	0	6	0	0	0	0	0	0	0	3	0	2	1	7	2
481	3444	CC(C)CCC(C)(C)CC(C)C	C12H26	38	-73.739	C -2.923191 -1.063432 1.370081 H -2.549934 -2.034395 1.017508 H -3.929678 -1.223498 1.774869 H -2.283162 -0.740378 2.197907 C -2.949865 -0.040655 0.223684 C -1.556121 0.196439 -0.396291 C 0.837985 1.249655 -0.030266 C 1.562535 0.088751 -0.770353 C 1.978948 -1.163860 0.047951 C 1.783631 -2.443992 -0.781977 H 2.390819 -2.413162 -1.696371 H 0.736968 -2.571084 -1.083310 H 2.081280 -3.335636 -0.216818…	0	0	0	0	0	6	0	0	0	0	0	0	0	3	0	2	1	6	1
482	3445	CCCC(C)(C)[C@H](C)CC(C)C	C12H26	38	-73.046	C -4.143045 -1.383403 0.156154 H -4.278349 -1.291735 1.241075 H -4.409310 -2.408281 -0.127046 H -4.862097 -0.707543 -0.323164 C -2.704947 -1.044534 -0.254640 C -2.314211 0.390250 0.132181 C 0.223391 -0.038947 0.381036 C 1.664995 0.474495 0.129770 C 2.773274 -0.602198 0.175690 C 2.725822 -1.537572 -1.042786 H 2.898474 -0.975877 -1.970477 H 1.760579 -2.046922 -1.138025 H 3.500532 -2.310653 -0.97437…	0	0	0	0	0	6	0	0	0	0	0	0	0	3	0	2	1	8	0
483	3446	CC[C@@H](C)[C@@H](C)[C@H](C)CC(C)C	C12H26	38	-71.1991	C 4.629199 0.218717 -0.259701 H 4.746846 1.297116 -0.108573 H 5.410118 -0.097887 -0.960857 H 4.827400 -0.274231 0.700384 C 3.239037 -0.153186 -0.792255 C 2.064360 0.190770 0.156449 C -0.537131 0.013434 0.412058 C -1.819845 -0.549829 -0.244933 C -3.126763 0.227298 0.029680 C -3.128238 1.625027 -0.609014 H -3.022875 1.554180 -1.699892 H -2.312858 2.254507 -0.236523 H -4.068656 2.149150 -0.400583 C …	0	0	0	0	0	6	0	0	0	0	0	0	0	2	0	4	0	7	0
484	3447	CC(C)C[C@@H](C)[C@H](C)CC(C)C	C12H26	38	-73.8216	C 4.342985 -0.283498 -0.943953 H 4.166111 -1.153678 -1.589916 H 5.335166 -0.402239 -0.492242 H 4.370310 0.605729 -1.585275 C 3.251166 -0.166221 0.131338 C 1.877188 0.059313 -0.536248 C -0.669928 0.290174 -0.399956 C -1.877189 0.059312 0.536248 C -3.251166 -0.166220 -0.131339 C -3.269470 -1.398104 -1.049142 H -3.005799 -2.305784 -0.489835 H -2.564770 -1.304709 -1.882574 H -4.267232 -1.551472 -1.47…	0	0	0	0	0	6	0	0	0	0	0	0	0	2	0	4	0	6	0
485	3448	CCC(C)(C)C[C@H](C)CC(C)C	C12H26	38	-73.5329	C 1.840046 2.440353 0.099386 H 2.616661 2.661634 -0.640973 H 1.822533 3.273436 0.811635 H 0.875690 2.437580 -0.420616 C 2.104431 1.120751 0.836028 C 2.190063 -0.169736 -0.026010 C -0.426815 -0.694139 -0.027242 C -1.606428 0.056827 -0.686572 C -2.987103 -0.049963 -0.007202 C -2.976587 0.482233 1.433962 H -2.662343 1.534271 1.459627 H -2.295567 -0.083923 2.078872 H -3.976735 0.424701 1.879966 C -4.…	0	0	0	0	0	6	0	0	0	0	0	0	0	3	0	2	1	7	1
486	3449	CC(C)C[C@@H](C)CCC(C)(C)C	C12H26	38	-76.0593	C -3.367470 -0.344863 -1.417796 H -3.332591 0.619796 -1.939886 H -4.372275 -0.762381 -1.557578 H -2.659751 -1.019502 -1.912255 C -3.050509 -0.177938 0.081315 C -1.677333 0.520042 0.283322 C 0.905318 0.483384 0.040654 C 2.061885 -0.436189 -0.408574 C 3.497958 -0.003883 -0.045919 C 3.708992 0.125842 1.470250 H 3.498552 -0.825713 1.976699 H 3.060534 0.889087 1.914114 H 4.745735 0.400343 1.699082 C 4…	0	0	0	0	0	6	0	0	0	0	0	0	0	3	0	2	1	5	0
487	3450	CC[C@@H](C)C(C)(C)CCC(C)C	C12H26	38	-73.0536	C 3.640910 -1.726801 -0.637997 H 3.539418 -2.487011 0.144297 H 4.710667 -1.622678 -0.853667 H 3.156833 -2.115935 -1.542498 C 3.034176 -0.378776 -0.225030 C 1.513417 -0.433316 0.066435 C -0.699820 0.869151 0.365816 C -1.566331 -0.084834 -0.471971 C -3.077332 -0.011158 -0.163646 C -3.873004 -0.845338 -1.179095 H -3.599147 -1.906780 -1.114808 H -3.681176 -0.514603 -2.206957 H -4.951985 -0.770598 -0.…	0	0	0	0	0	6	0	0	0	0	0	0	0	3	0	2	1	8	0
488	3451	CC(C)CCCC(C)(C)C(C)C	C12H26	38	-74.0633	C -2.124166 2.041582 0.032462 H -2.825388 2.137366 0.870069 H -2.386873 2.815497 -0.698521 H -1.122417 2.274232 0.407018 C -2.203850 0.649802 -0.621172 C -1.782434 -0.527008 0.327879 C 0.797961 -0.088590 -0.069937 C 2.152240 0.032724 0.645882 C 3.352961 0.361272 -0.263754 C 4.606306 0.639931 0.579702 H 4.895619 -0.248302 1.156794 H 4.436623 1.457220 1.290970 H 5.458827 0.916086 -0.052340 C 3.6334…	0	0	0	0	0	6	0	0	0	0	0	0	0	3	0	2	1	7	0
489	3452	CC(C)CCC[C@@H](C)C(C)(C)C	C12H26	38	-74.1043	C 2.647720 -1.792104 -0.524030 H 1.821671 -2.330457 -0.047758 H 3.562914 -2.363867 -0.327761 H 2.474809 -1.804401 -1.607593 C 2.793120 -0.345758 -0.002146 C 1.494350 0.472208 -0.338617 C -1.092305 0.330941 -0.250921 C -2.310622 -0.150874 0.549954 C -3.682676 0.231626 -0.040808 C -3.936024 -0.415711 -1.411069 H -3.909266 -1.511076 -1.335203 H -3.190242 -0.114579 -2.154436 H -4.921945 -0.135143 -1.…	0	0	0	0	0	6	0	0	0	0	0	0	0	3	0	2	1	6	0
490	3453	CCCCC(C)(C)C(C)(C)CC	C12H26	38	-69.9962	C -4.815645 -0.569721 0.107189 H -4.872015 -0.710323 1.193755 H -5.547247 -1.243308 -0.353773 H -5.128661 0.459427 -0.108551 C -3.400095 -0.838784 -0.413641 C -2.341909 0.086030 0.205510 C 0.222914 0.734462 0.145358 C 1.646996 0.094800 -0.216861 C 1.978205 -1.070893 0.766399 C 3.167651 -1.970929 0.398169 H 4.097148 -1.405294 0.268064 H 2.989435 -2.534890 -0.523335 H 3.342921 -2.700416 1.197528 H …	0	0	0	0	0	6	0	0	0	0	0	0	0	4	0	0	2	10	0
491	3454	CCC[C@H](C)[C@H](C)C(C)(C)CC	C12H26	38	-70.2338	C -4.321706 -0.902197 -0.452588 H -4.642370 -0.199107 -1.231296 H -5.203867 -1.163680 0.143177 H -3.976412 -1.814533 -0.954710 C -3.216180 -0.296478 0.418944 C -1.956403 0.067267 -0.382091 C 0.601123 0.632145 -0.175579 C 1.454348 -0.628820 0.225159 C 2.832909 -0.624318 -0.500752 C 3.747188 0.586232 -0.268424 H 3.999345 0.711989 0.790149 H 3.296435 1.522757 -0.614807 H 4.689314 0.457340 -0.813941 …	0	0	0	0	0	6	0	0	0	0	0	0	0	3	0	2	1	9	1
492	3455	CC[C@@H](C)C[C@H](C)C(C)(C)CC	C12H26	38	-72.5209	C -4.641463 -0.033898 0.263126 H -4.870755 -0.833877 -0.449105 H -5.466002 0.687103 0.221228 H -4.637978 -0.474594 1.268245 C -3.303901 0.649009 -0.045602 C -2.058541 -0.250962 0.099897 C 0.533512 -0.058628 0.417213 C 1.825918 0.444190 -0.323264 C 3.115046 -0.135014 0.329314 C 3.240346 -1.663125 0.394269 H 3.208305 -2.120092 -0.600856 H 2.445708 -2.120121 0.994439 H 4.196136 -1.945109 0.851101 H …	0	0	0	0	0	6	0	0	0	0	0	0	0	3	0	2	1	9	0
493	3456	CCC(C)(C)[C@@H](C)CCC(C)C	C12H26	38	-73.1046	C -3.698342 1.102222 0.548171 H -3.840232 0.679965 1.552104 H -4.658620 1.524073 0.228103 H -2.986338 1.930092 0.632337 C -3.218380 0.022640 -0.434262 C -1.877103 -0.610585 -0.010363 C 0.680132 -0.327885 0.290701 C 1.918506 0.507604 -0.200115 C 3.258708 -0.178298 0.196498 C 3.486724 -1.609929 -0.306618 H 3.454051 -1.670286 -1.399977 H 2.742743 -2.311679 0.086346 H 4.472696 -1.969636 0.009953 H 3.…	0	0	0	0	0	6	0	0	0	0	0	0	0	3	0	2	1	8	0
494	3457	CCCC(C)(C)CC(C)(C)CC	C12H26	38	-70.0306	C 3.583015 -1.808033 -0.073297 H 3.321913 -2.230425 -1.051620 H 3.882111 -2.637246 0.578172 H 4.459217 -1.163620 -0.216467 C 2.408669 -1.022905 0.523687 C 1.970989 0.139514 -0.380450 C -0.473437 0.336754 0.547983 C -1.494396 -0.299338 -0.451258 C -2.410137 -1.264362 0.364085 C -3.209877 -0.666848 1.529373 H -3.878650 0.136010 1.199627 H -2.560422 -0.260812 2.312098 H -3.833841 -1.439989 1.992685 …	0	0	0	0	0	6	0	0	0	0	0	0	0	4	0	0	2	8	2
495	3458	CCC(C)(C)CCC(C)(C)CC	C12H26	38	-75.1641	C -2.541481 1.827135 -1.025090 H -3.279011 2.128962 -0.273254 H -2.848294 2.271540 -1.979019 H -1.581862 2.278601 -0.748943 C -2.442981 0.301862 -1.155952 C -2.045138 -0.486270 0.121409 C 0.526803 -0.069051 -0.233196 C 1.901861 0.320325 0.379817 C 2.979985 0.322862 -0.741348 C 3.241990 -1.000687 -1.472152 H 2.357149 -1.361182 -2.007732 H 3.562797 -1.792336 -0.785953 H 4.038827 -0.870180 -2.213556…	0	0	0	0	0	6	0	0	0	0	0	0	0	4	0	0	2	8	0
496	3459	CCC[C@H](C)C(C)(C)[C@@H](C)CC	C12H26	38	-69.5863	C -3.874060 1.446601 0.662927 H -4.399428 0.661434 1.220631 H -4.628443 2.040889 0.134529 H -3.387558 2.101934 1.396167 C -2.852252 0.846465 -0.308848 C -1.766967 0.021249 0.400016 C 0.656101 -0.928487 0.122731 C 1.413153 0.429102 0.397870 C 1.932563 1.119896 -0.888908 C 2.156845 2.630301 -0.736584 H 2.887764 2.864880 0.045389 H 1.221773 3.143083 -0.478693 H 2.527693 3.067219 -1.671104 H 1.229848…	0	0	0	0	0	6	0	0	0	0	0	0	0	3	0	2	1	10	0
497	3460	CCCC(C)(C)[C@H](C)[C@@H](C)CC	C12H26	38	-70.3453	C -4.201049 -1.198452 0.174970 H -4.298532 -1.093069 1.262699 H -4.562194 -2.197184 -0.096276 H -4.871963 -0.464195 -0.287975 C -2.750741 -0.986030 -0.275984 C -2.229568 0.412290 0.090517 C 0.266446 -0.226459 0.289011 C 1.767652 0.090239 -0.041199 C 2.538120 -1.224636 -0.305971 C 3.994676 -1.050161 -0.752367 H 4.618579 -0.609929 0.032716 H 4.063438 -0.401347 -1.635059 H 4.437586 -2.017062 -1.0179…	0	0	0	0	0	6	0	0	0	0	0	0	0	3	0	2	1	9	1
498	3461	CC[C@@H](C)[C@@H](C)[C@H](C)[C@@H](C)CC	C12H26	38	-68.6641	C 4.399839 -0.567162 -0.007343 H 4.627812 -0.385290 -1.063254 H 5.056012 -1.377089 0.332008 H 4.673975 0.336686 0.551053 C 2.926482 -0.928562 0.221320 C 1.916219 0.171217 -0.190527 C -0.650497 0.729610 -0.194946 C -2.063267 0.152759 0.142736 C -2.303875 -1.200960 -0.567880 C -3.476455 -2.019053 -0.011925 H -4.433510 -1.494715 -0.107851 H -3.328611 -2.246239 1.051290 H -3.573226 -2.972915 -0.54341…	0	0	0	0	0	6	0	0	0	0	0	0	0	2	0	4	0	8	0
499	3462	CC[C@H](C)[C@@H](C)CC(C)(C)CC	C12H26	38	-71.9381	C 4.361191 -0.634285 0.405438 H 4.367333 -1.601457 -0.108895 H 5.054935 -0.711408 1.250657 H 4.770802 0.113100 -0.283032 C 2.961348 -0.254947 0.905934 C 1.844533 -0.085449 -0.162840 C -0.741319 0.559787 -0.208298 C -1.974669 -0.254020 0.286239 C -3.149807 -0.184065 -0.712343 C -4.259563 -1.212984 -0.461631 H -4.758401 -1.053948 0.500713 H -3.859559 -2.234839 -0.463531 H -5.028273 -1.156705 -1.241…	0	0	0	0	0	6	0	0	0	0	0	0	0	3	0	2	1	8	1
500	3463	CC[C@H](C)CC(C)(C)[C@H](C)CC	C12H26	38	-70.2595	C -3.441797 -1.899984 -0.666030 H -4.335636 -1.311103 -0.900935 H -3.777563 -2.821995 -0.177281 H -2.971853 -2.180085 -1.616960 C -2.458960 -1.131721 0.227404 C -1.954137 0.195729 -0.392295 C 0.535133 -0.285398 -0.377076 C 1.984370 -0.129602 0.162331 C 3.000121 -0.253339 -0.994985 C 4.464681 -0.021928 -0.606305 H 4.835776 -0.789067 0.081807 H 4.595486 0.952891 -0.119114 H 5.109988 -0.037856 -1.49…	0	0	0	0	0	6	0	0	0	0	0	0	0	3	0	2	1	9	1
501	3464	CCCC(C)(C)C(C)(C)CCC	C12H26	38	-69.7487	C 0.463162 -3.509345 2.096495 H 1.463848 -3.196220 2.419749 H 0.430290 -4.604453 2.131077 H -0.254522 -3.130562 2.834741 C 0.144465 -2.985011 0.690996 C 0.208027 -1.449029 0.623365 C 0.208027 0.774544 -0.721004 C -0.208027 1.449029 0.623365 C -0.144465 2.985011 0.690996 C -0.463162 3.509345 2.096495 H 0.254522 3.130562 2.834741 H -1.463848 3.196220 2.419749 H -0.430290 4.604453 2.131077 H -0.8528…	0	0	0	0	0	6	0	0	0	0	0	0	0	4	0	0	2	10	0
502	3465	CCCC(CCC)[C@H](C)C(C)C	C12H26	38	-70.6371	C -4.022499 -1.512559 -0.129723 H -3.824697 -2.590182 -0.073864 H -4.181833 -1.261437 -1.185833 H -4.960333 -1.317587 0.403142 C -2.862968 -0.703375 0.462628 H -3.123920 0.362057 0.437091 H -2.742335 -0.963062 1.524520 C -1.537669 -0.949423 -0.275035 H -1.398092 -2.034495 -0.344000 H -1.632398 -0.594575 -1.312294 C -0.278833 -0.325173 0.378064 H -0.171324 -0.805850 1.363644 C -0.463484 1.187809 0…	0	0	0	0	0	5	0	0	0	0	0	0	0	4	0	3	0	6	0
503	3466	CCCC(CCC)C(C)(C)CC	C12H26	38	-70.1853	C 3.181501 -2.361571 -0.252552 H 2.862654 -3.170346 0.416887 H 3.903907 -1.745259 0.297181 H 3.709220 -2.818307 -1.097784 C 1.985803 -1.527204 -0.722355 H 2.331607 -0.751033 -1.419631 H 1.298319 -2.163444 -1.296319 C 1.222214 -0.862566 0.433173 H 0.909133 -1.642589 1.137553 H 1.927701 -0.238180 0.997890 C 0.002860 0.001293 -0.014943 H 0.009178 0.009128 -1.114879 C 0.185335 1.470466 0.434268 H 0.3…	0	0	0	0	0	5	0	0	0	0	0	0	0	5	0	1	1	8	0
504	3467	CCCC(CC(C)C)CC(C)C	C12H26	38	-72.7678	C -2.503317 -1.109452 1.431189 H -3.219075 -0.280352 1.510737 H -1.644710 -0.869306 2.067653 H -2.983120 -2.002591 1.849027 C -2.096029 -1.338544 -0.032857 H -1.393587 -2.184661 -0.057759 C -1.400864 -0.103820 -0.646043 H -1.321721 -0.243639 -1.735022 H -2.068039 0.758287 -0.504541 C 0.009560 0.235870 -0.108796 H -0.004977 0.141728 0.986244 C 0.388100 1.697138 -0.443069 H 0.170176 1.884867 -1.506…	0	0	0	0	0	5	0	0	0	0	0	0	0	4	0	3	0	5	0
505	3468	CCC[C@@H](CC(C)C)C(C)(C)C	C12H26	38	-72.3075	C -2.718383 0.057742 1.450574 H -1.876114 0.232856 2.128758 H -3.047737 -0.980461 1.590335 H -3.539078 0.711354 1.769521 C -2.348485 0.318264 -0.018253 C -1.170429 -0.562993 -0.491769 H -1.426855 -1.605059 -0.262356 C 0.212728 -0.192789 0.099515 C 0.714451 1.145882 -0.520915 H -0.082002 1.583404 -1.137660 H 1.541733 0.958630 -1.217872 C 1.152394 2.206790 0.500683 H 1.946189 1.802442 1.141665 H 0.…	0	0	0	0	0	6	0	0	0	0	0	0	0	3	0	2	1	7	0
506	3469	CCC[C@@H]([C@@H](C)CC)C(C)(C)C	C12H26	38	-68.4364	C 0.961022 3.234668 -0.898043 H 1.490629 3.702561 -0.061085 H -0.049377 3.662072 -0.930552 H 1.476194 3.533994 -1.818165 C 0.911953 1.705589 -0.773647 C 0.127953 1.202540 0.461996 C -0.273117 -0.320013 0.421559 C 0.752663 -1.223527 -0.308931 H 0.899199 -0.887356 -1.343652 H 0.339797 -2.234864 -0.383440 C 2.125537 -1.363269 0.371428 H 1.979711 -1.666487 1.418062 H 2.645285 -0.398901 0.404095 C 3.0…	0	0	0	0	0	6	0	0	0	0	0	0	0	3	0	2	1	8	1
507	3470	CCCC(C)(CCC)C(C)(C)C	C12H26	38	-68.6347	C -3.483178 -1.461912 -0.616506 H -3.257782 -2.514564 -0.828395 H -3.539920 -0.937587 -1.578579 H -4.476985 -1.420683 -0.155891 C -2.418541 -0.838830 0.294868 C -1.017945 -0.892765 -0.339463 C 0.163540 -0.279821 0.470780 C -0.075500 1.246863 0.710869 H 0.720064 1.625550 1.365789 H -0.991937 1.330027 1.310484 C -0.226274 2.215096 -0.474242 H -0.954444 1.826042 -1.197648 H 0.721064 2.315642 -1.0161…	0	0	0	0	0	6	0	0	0	0	0	0	0	4	0	0	2	10	0
508	3471	CCCC[C@@](C)(CC)C(C)(C)C	C12H26	38	-68.8316	C -4.313996 -0.613337 0.364775 H -4.349225 -0.070639 1.317607 H -4.178562 -1.677127 0.596270 H -5.291158 -0.500240 -0.118711 C -3.183570 -0.091851 -0.528178 C -1.793653 -0.226437 0.113164 C -0.678681 0.278995 -0.817330 C 0.784737 0.447370 -0.292612 C 0.821771 1.464894 0.886853 H 1.848066 1.514821 1.273420 C 0.363020 2.899523 0.583643 H -0.676482 2.940562 0.239810 H 0.426758 3.509285 1.492507 H 0.…	0	0	0	0	0	6	0	0	0	0	0	0	0	4	0	0	2	10	0
509	3472	CCC[C@H](C)[C@@H](CC)C(C)(C)C	C12H26	38	-68.6748	C -4.297392 -0.705293 -0.725808 H -4.062809 -1.290645 -1.623516 H -4.562425 0.307716 -1.053339 H -5.186557 -1.147847 -0.262106 C -3.112074 -0.680302 0.245891 C -1.851292 -0.060352 -0.374294 C -0.576743 -0.142307 0.499765 C 0.703209 0.297064 -0.305365 C 1.105403 1.776798 -0.083565 H 2.059777 1.960487 -0.585383 C 0.112574 2.815100 -0.627821 H -0.848730 2.801039 -0.105726 H 0.523853 3.826604 -0.5259…	0	0	0	0	0	6	0	0	0	0	0	0	0	3	0	2	1	8	1
510	3473	CC[C@@H](C)C[C@@H](CC)C(C)(C)C	C12H26	38	-72.1005	C -4.164060 -0.883849 -0.019672 H -3.959572 -1.648477 -0.779888 H -4.629069 -0.030143 -0.524394 H -4.905623 -1.297050 0.673749 C -2.883211 -0.487497 0.724134 C -1.725895 -0.001933 -0.173918 C -0.461264 0.245597 0.683071 C 0.888572 0.387278 -0.080683 C 1.687023 1.594963 0.472439 H 2.730074 1.547276 0.140501 C 1.121939 2.958736 0.056381 H 0.084926 3.094390 0.383303 H 1.712323 3.775051 0.488721 H 1.…	0	0	0	0	0	6	0	0	0	0	0	0	0	3	0	2	1	8	0
511	3474	CC[C@H](CCC(C)C)C(C)(C)C	C12H26	38	-72.3269	C -3.170777 -1.172199 0.982777 H -2.451182 -1.272003 1.802453 H -3.066580 -2.053932 0.336239 H -4.175310 -1.201451 1.421679 C -2.959925 0.120761 0.179419 C -1.561860 0.197149 -0.466556 C -0.387667 0.274882 0.522962 C 1.008597 0.451101 -0.148801 C 1.731959 1.684252 0.445059 H 2.782576 1.698074 0.134457 C 1.098778 3.019986 0.034064 H 0.048296 3.090352 0.339623 H 1.629671 3.863718 0.490098 H 1.13516…	0	0	0	0	0	6	0	0	0	0	0	0	0	3	0	2	1	7	0
512	3475	CCCC(CCC)C(CC)CC	C12H26	38	-69.4889	C 3.256959 -1.550984 -1.056726 H 4.033015 -0.940116 -0.583615 H 3.148028 -1.205427 -2.092726 H 3.629337 -2.581448 -1.090697 C 1.919517 -1.487682 -0.306472 C 1.200930 -0.116045 -0.352489 C -0.152625 -0.142275 0.429309 C -0.837570 1.245643 0.513920 C -1.276313 1.872723 -0.818469 H -1.966163 1.196644 -1.340970 C -1.954861 3.234279 -0.628804 H -1.279631 3.949597 -0.142808 H -2.263124 3.666520 -1.5878…	0	0	0	0	0	4	0	0	0	0	0	0	0	6	0	2	0	6	0
513	3476	CCCC(CC)(CCC)CCC	C12H26	38	-71.4019	C -3.765719 -0.595415 -1.076758 H -3.713913 -1.611481 -1.487346 H -3.711164 0.103424 -1.920737 H -4.749366 -0.475448 -0.608207 C -2.633259 -0.343664 -0.073699 C -1.246004 -0.507103 -0.713076 C 0.000000 -0.281797 0.191914 C 1.246004 -0.507104 -0.713076 C 2.633258 -0.343679 -0.073694 H 2.745185 -1.034942 0.771673 C 3.765718 -0.595404 -1.076760 H 3.711166 0.103460 -1.920718 H 4.749365 -0.475455 -0.6…	0	0	0	0	0	4	0	0	0	0	0	0	0	7	0	0	1	8	0
514	3477	CCC[C@@H](C(C)C)C(CC)CC	C12H26	38	-68.9444	C -1.936735 -1.096507 2.327408 H -2.800712 -0.420379 2.325242 H -1.121498 -0.586181 2.853102 H -2.206553 -1.978392 2.920092 C -1.546527 -1.492227 0.898446 C -1.130142 -0.310404 -0.011677 C 0.302602 0.200732 0.355943 C 1.419775 -0.609419 -0.345560 C 2.797147 -0.530382 0.331059 H 2.702134 -0.850298 1.378733 C 3.852533 -1.392322 -0.370687 H 3.996118 -1.074952 -1.411017 H 4.823407 -1.326677 0.133856 …	0	0	0	0	0	5	0	0	0	0	0	0	0	4	0	3	0	7	0
515	3478	CCCC(CC)(CCC)C(C)C	C12H26	38	-68.0694	C -3.258063 -1.259749 -1.526018 H -3.965749 -1.302000 -0.688584 H -2.909507 -2.282849 -1.714189 H -3.810962 -0.927382 -2.412231 C -2.084423 -0.322223 -1.214256 C -1.318319 -0.768387 0.042973 C 0.018183 -0.062656 0.427049 C 1.060658 -0.325072 -0.697820 C 2.507512 0.129379 -0.442021 H 2.922279 -0.402710 0.423317 C 3.412432 -0.113003 -1.656053 H 3.058649 0.443264 -2.533094 H 4.443453 0.201009 -1.456…	0	0	0	0	0	5	0	0	0	0	0	0	0	5	0	1	1	10	0
516	3479	CCC[C@H](CC)[C@@H](CC)C(C)C	C12H26	38	-68.9707	C -3.224982 -1.999006 -0.759593 H -4.078946 -1.639299 -0.172125 H -2.853492 -2.910619 -0.275114 H -3.597478 -2.277712 -1.752097 C -2.127075 -0.932914 -0.850756 C -1.594964 -0.520530 0.530758 C -0.472541 0.547200 0.549164 C 0.850119 0.102636 -0.155099 C 1.987290 1.151676 0.046582 H 2.892742 0.655596 0.414073 C 2.357998 1.932809 -1.220984 H 1.500113 2.483768 -1.623115 H 3.157147 2.657443 -1.023085 …	0	0	0	0	0	5	0	0	0	0	0	0	0	4	0	3	0	7	0
517	3480	CCCCC(CC)(CC)C(C)C	C12H26	38	-67.9352	C -4.416419 -0.154934 0.034402 H -4.523765 0.914263 0.255513 H -4.433687 -0.692470 0.990653 H -5.297878 -0.466093 -0.537999 C -3.121290 -0.434668 -0.734795 C -1.858011 -0.017514 0.033497 C -0.575160 -0.287753 -0.769160 C 0.815395 -0.096515 -0.089118 C 1.860323 -0.495021 -1.182966 H 1.765380 0.200028 -2.026875 C 3.338605 -0.565741 -0.774866 H 3.515476 -1.301785 0.016991 H 3.948144 -0.862425 -1.636…	0	0	0	0	0	5	0	0	0	0	0	0	0	5	0	1	1	10	0
518	3481	CCCC(CCC)CC(C)(C)C	C12H26	38	-73.1257	C -3.399137 -0.347128 -0.928995 H -3.256682 -1.005449 -1.794984 H -3.563072 0.670157 -1.305898 H -4.315216 -0.664128 -0.415261 C -2.184019 -0.401943 0.019405 C -0.941554 0.097506 -0.771519 C 0.445717 0.039625 -0.073476 C 1.278735 1.304499 -0.385336 C 0.818724 2.578292 0.336846 H 0.868364 2.411785 1.422433 C 1.657045 3.808020 -0.028981 H 1.596410 4.023760 -1.102930 H 1.316394 4.699991 0.509358 H 2…	0	0	0	0	0	5	0	0	0	0	0	0	0	5	0	1	1	5	1
519	3482	CCCC(C)(CCC)CC(C)C	C12H26	38	-71.4592	C -3.319614 0.534735 -1.053132 H -3.455045 -0.017990 -1.992187 H -2.845864 1.492972 -1.297895 H -4.316201 0.746802 -0.646965 C -2.470013 -0.274376 -0.058778 C -1.062948 -0.572638 -0.647577 C 0.175955 -0.438732 0.288634 C 0.360278 1.022740 0.785494 C 0.612919 2.108405 -0.271789 H -0.217673 2.140155 -0.988571 C 0.784819 3.497725 0.354143 H 1.632943 3.517596 1.049811 H 0.963905 4.261986 -0.410893 H …	0	0	0	0	0	5	0	0	0	0	0	0	0	5	0	1	1	7	1
520	3483	CCC[C@H](CC(C)C)[C@@H](C)CC	C12H26	38	-71.3895	C -2.683310 -0.811186 -1.453669 H -2.682553 -1.904446 -1.350028 H -1.886007 -0.544032 -2.155850 H -3.636674 -0.522381 -1.912127 C -2.504262 -0.135652 -0.084893 C -1.149377 -0.489143 0.568405 C 0.101291 0.145816 -0.087664 C 1.407249 -0.658077 0.197614 C 1.465346 -1.956601 -0.637117 H 1.232382 -1.706876 -1.681734 C 2.815162 -2.684028 -0.597683 H 3.052167 -3.060264 0.403413 H 2.814407 -3.543777 -1.2…	0	0	0	0	0	5	0	0	0	0	0	0	0	4	0	3	0	6	0
521	3484	CCCC(C)(CCC)[C@@H](C)CC	C12H26	38	-70.4432	C 3.539111 -0.787343 -1.141349 H 4.105316 0.150417 -1.114352 H 3.093383 -0.875275 -2.139988 H 4.259048 -1.606016 -1.026271 C 2.461030 -0.849274 -0.050754 C 1.406514 0.283981 -0.145932 C 0.033886 -0.065737 0.549245 C -0.643053 -1.219698 -0.250976 C -2.057672 -1.646158 0.174833 H -2.760624 -0.812359 0.053728 C -2.565583 -2.844492 -0.636418 H -1.914877 -3.717956 -0.505109 H -3.577617 -3.134025 -0.33…	0	0	0	0	0	5	0	0	0	0	0	0	0	5	0	1	1	9	0
522	3485	CCC[C@H]([C@@H](C)CC)[C@@H](C)CC	C12H26	38	-69.2367	C -3.830872 -0.944384 -0.559760 H -4.185308 -1.214528 0.440959 H -3.694926 -1.874277 -1.126372 H -4.631233 -0.374669 -1.045976 C -2.532262 -0.128823 -0.513306 C -1.313868 -0.892620 0.053086 C 0.012808 -0.117200 -0.210991 C 1.301114 -0.938194 0.109275 C 2.557269 -0.216190 -0.434713 H 2.498748 0.852562 -0.198888 C 3.892412 -0.744949 0.105483 H 4.071863 -1.789584 -0.170676 H 4.730222 -0.156730 -0.28…	0	0	0	0	0	5	0	0	0	0	0	0	0	4	0	3	0	7	0
523	3486	CCC[C@@H](CC(C)(C)C)C(C)C	C12H26	38	-73.7357	C -3.142866 -0.776928 1.080276 H -3.289325 0.048450 1.788085 H -2.830876 -1.658238 1.654532 H -4.115056 -1.002731 0.624788 C -2.097965 -0.412312 0.005761 C -0.747872 -0.141016 0.730429 C 0.455843 0.347408 -0.125346 C 1.752523 -0.416480 0.231889 C 1.800591 -1.863019 -0.280206 H 1.701469 -1.859651 -1.375123 C 3.089857 -2.592419 0.112774 H 3.198099 -2.646493 1.203178 H 3.104056 -3.617880 -0.274181 H…	0	0	0	0	0	6	0	0	0	0	0	0	0	3	0	2	1	6	1
524	3487	CCC[C@H](C(C)C)[C@H](C)C(C)C	C12H26	38	-70.349	C 2.554107 -0.204246 1.544983 H 2.562162 -1.249172 1.876969 H 1.793886 0.324796 2.130386 H 3.528369 0.226845 1.804924 C 2.304830 -0.093010 0.031345 C 0.902236 -0.601030 -0.420374 C -0.302243 0.202437 0.169578 C -1.651762 -0.265801 -0.457080 C -2.558776 -1.054914 0.499766 H -2.785504 -0.428790 1.374229 C -3.866830 -1.513133 -0.152820 H -3.673855 -2.172504 -1.008353 H -4.497344 -2.063304 0.555198 H…	0	0	0	0	0	6	0	0	0	0	0	0	0	2	0	4	0	7	0
525	3488	CCC[C@@](C)(CC(C)C)C(C)C	C12H26	38	-69.7588	C 2.895854 -1.344305 -1.338983 H 3.435725 -0.531529 -1.842799 H 2.186090 -1.767616 -2.059649 H 3.627351 -2.122605 -1.089363 C 2.176352 -0.827778 -0.081681 C 1.156742 0.286365 -0.456829 C -0.216754 0.312158 0.281222 C -1.012446 -0.962184 -0.137515 C -2.446201 -1.122501 0.393487 H -3.083540 -0.309373 0.023502 C -3.065660 -2.463816 -0.017936 H -2.482935 -3.307074 0.373122 H -4.090119 -2.563338 0.358…	0	0	0	0	0	6	0	0	0	0	0	0	0	3	0	2	1	9	1
526	3489	CC[C@H](C)[C@@H](CC(C)C)C(C)C	C12H26	38	-70.873	C 2.353859 -1.840025 0.821794 H 2.253559 -2.641910 0.078437 H 1.502810 -1.914434 1.507211 H 3.263742 -2.038975 1.400825 C 2.431430 -0.466146 0.139210 C 1.142971 -0.106087 -0.637695 C -0.124762 0.191348 0.219268 C -1.370320 -0.603737 -0.295628 C -2.692303 -0.180186 0.385956 H -2.865145 0.888731 0.223987 C -3.940541 -0.930528 -0.099653 H -3.926524 -1.989767 0.176240 H -4.845868 -0.491794 0.335590 H…	0	0	0	0	0	6	0	0	0	0	0	0	0	2	0	4	0	7	0
527	3490	CC(C)CC(CC(C)C)C(C)C	C12H26	38	-73.2646	C 2.382179 -1.261050 1.460653 H 1.926642 -2.260075 1.434491 H 1.799436 -0.647966 2.156583 H 3.389498 -1.367620 1.880734 C 2.438070 -0.649159 0.052372 C 1.043731 -0.526685 -0.599229 C -0.003905 0.368104 0.105400 C -1.399275 0.146742 -0.530019 C -2.137693 -1.141643 -0.102454 H -1.439078 -1.987737 -0.181311 C -2.631176 -1.073536 1.351387 H -3.357391 -0.259442 1.477250 H -3.126836 -2.007664 1.641604 …	0	0	0	0	0	6	0	0	0	0	0	0	0	2	0	4	0	6	0
528	3491	CCC[C@H](C(C)C)C(C)(C)CC	C12H26	38	-68.3929	C 1.907833 2.172395 -1.050408 H 0.871213 2.293813 -1.383405 H 2.456380 1.667534 -1.853122 H 2.335666 3.176243 -0.945386 C 2.007307 1.413746 0.279634 C 1.515354 -0.066092 0.297235 C 0.032944 -0.206726 -0.231944 C -0.952735 0.780175 0.442862 C -2.268216 1.026441 -0.315775 H -2.851535 0.101729 -0.393996 C -3.132496 2.105355 0.347025 H -2.598936 3.062367 0.403494 H -4.060796 2.273851 -0.210987 H -3.4…	0	0	0	0	0	6	0	0	0	0	0	0	0	3	0	2	1	9	1
529	3492	CCC[C@](C)(C(C)C)[C@@H](C)CC	C12H26	38	-66.8061	C 3.389874 -0.967170 -1.122838 H 3.878062 -1.561974 -0.342503 H 3.811402 0.044742 -1.078150 H 3.672196 -1.401766 -2.088856 C 1.864098 -0.936153 -0.960108 C 1.393782 -0.350615 0.397456 C -0.069986 0.252030 0.367642 C -1.026378 -0.813836 -0.265152 C -2.510148 -0.826817 0.148526 H -2.976296 0.151536 -0.006686 C -3.304087 -1.887840 -0.623498 H -2.883313 -2.889589 -0.470006 H -4.351916 -1.914446 -0.30…	0	0	0	0	0	6	0	0	0	0	0	0	0	3	0	2	1	11	0
530	3493	CC[C@H](C)[C@@H](C(C)C)[C@@H](C)CC	C12H26	38	-66.8273	C -3.926092 -0.707251 -0.570351 H -4.303355 -0.791309 0.454785 H -3.787881 -1.724557 -0.957819 H -4.710763 -0.229072 -1.168004 C -2.620388 0.095683 -0.641732 C -1.429817 -0.561687 0.095658 C -0.063595 0.080862 -0.309881 C 1.174941 -0.787217 0.090080 C 2.450049 -0.325593 -0.658685 H 2.509423 0.766074 -0.653161 C 3.767177 -0.868673 -0.088331 H 3.830361 -1.960772 -0.140829 H 4.623968 -0.467038 -0.64…	0	0	0	0	0	6	0	0	0	0	0	0	0	2	0	4	0	8	0
531	3494	CC(C)CCC(C(C)C)C(C)C	C12H26	38	-69.3625	C -3.536563 1.183932 0.606536 H -3.598810 1.826605 -0.281975 H -2.858684 1.665051 1.319668 H -4.532252 1.156548 1.065231 C -3.068666 -0.229240 0.225716 C -1.681035 -0.233698 -0.446761 C -0.527906 0.288526 0.425235 C 0.876526 0.070604 -0.208145 C 1.863820 1.212648 0.184773 H 1.883368 1.278217 1.283520 C 3.311085 1.003655 -0.297813 H 3.349106 0.880061 -1.387669 H 3.920453 1.880596 -0.047588 H 3.793…	0	0	0	0	0	6	0	0	0	0	0	0	0	2	0	4	0	6	0
532	3495	CC[C@H](CC(C)(C)CC)C(C)C	C12H26	38	-72.2298	C -3.391432 0.409302 1.302947 H -3.710146 1.237138 0.659837 H -2.683374 0.809501 2.036575 H -4.274523 0.069349 1.856356 C -2.796597 -0.752307 0.495784 C -1.551351 -0.450247 -0.386791 C -0.392348 0.059312 0.518824 C 1.007757 0.256585 -0.132194 C 1.639875 1.605552 0.284715 H 2.706395 1.607667 0.025091 C 0.987454 2.831715 -0.364679 H -0.077652 2.910213 -0.118539 H 1.470709 3.757157 -0.030318 H 1.069…	0	0	0	0	0	6	0	0	0	0	0	0	0	3	0	2	1	8	1
533	3496	CC[C@H](C)CC(C(C)C)C(C)C	C12H26	38	-71.6031	C 3.648160 -0.220446 -1.298658 H 4.467597 -0.024706 -0.598446 H 3.475945 0.698840 -1.872691 H 3.994676 -0.988156 -2.000172 C 2.369116 -0.671294 -0.582411 C 1.756977 0.377113 0.369667 C 0.355571 -0.053580 0.869370 C -0.803486 0.006636 -0.168911 C -1.675443 -1.287504 -0.162688 H -2.463359 -1.143169 -0.912250 C -0.889785 -2.528281 -0.619165 H -0.089388 -2.797319 0.079765 H -1.557302 -3.395009 -0.697…	0	0	0	0	0	6	0	0	0	0	0	0	0	2	0	4	0	7	0
534	3497	CCC[C@@H](C)C(C(C)C)C(C)C	C12H26	38	-67.9736	C 4.436679 0.376254 -0.696320 H 4.521120 1.363514 -0.225342 H 4.280223 0.536067 -1.770375 H 5.398452 -0.134637 -0.572098 C 3.289020 -0.433751 -0.083230 C 1.923688 0.252289 -0.246036 C 0.725930 -0.562738 0.297385 C -0.637123 -0.054749 -0.276384 C -1.810758 -1.064173 -0.068636 H -2.129117 -1.022560 0.981800 C -3.033426 -0.714395 -0.938657 H -2.771390 -0.737500 -2.004719 H -3.837134 -1.443894 -0.781…	0	0	0	0	0	6	0	0	0	0	0	0	0	2	0	4	0	7	0
535	3498	CCCCC(C)(C(C)C)C(C)C	C12H26	38	-68.9804	C -4.271031 -0.233506 -0.577773 H -4.119937 -0.976801 -1.370462 H -4.327842 0.751905 -1.056661 H -5.243857 -0.434470 -0.114479 C -3.138402 -0.284535 0.452622 C -1.753432 -0.013539 -0.154240 C -0.640874 -0.036662 0.906802 C 0.853262 0.026259 0.461303 C 1.195099 -1.163369 -0.511168 H 0.639562 -0.981980 -1.439474 C 2.687168 -1.246146 -0.891187 H 3.303749 -1.551813 -0.038048 H 2.831624 -1.996017 -1.6…	0	0	0	0	0	6	0	0	0	0	0	0	0	3	0	2	1	10	0
536	3499	CCCC[C@H](C(C)C)C(C)(C)C	C12H26	38	-69.2813	C 4.558742 -0.499408 -0.252140 H 4.751903 0.553337 -0.011226 H 4.595240 -0.599554 -1.344030 H 5.381618 -1.091966 0.163997 C 3.204345 -0.955049 0.300607 C 2.020850 -0.152274 -0.257849 C 0.666864 -0.624691 0.299007 C -0.584527 0.041496 -0.325648 C -1.918496 -0.765318 -0.066323 C -2.399769 -0.658683 1.394912 H -2.657735 0.370011 1.668948 H -3.298101 -1.270454 1.545268 H -1.638907 -1.015913 2.098744 …	0	0	0	0	0	6	0	0	0	0	0	0	0	3	0	2	1	7	1
537	3500	CCC[C@@H](C)C(CC)(CC)CC	C12H26	38	-66.834	C 3.457437 0.088676 0.249094 H 3.613194 1.070082 -0.211368 H 3.672371 -0.671119 -0.510372 H 4.208893 -0.022752 1.039549 C 2.048830 -0.067464 0.841507 C 0.852298 0.050029 -0.145925 C -0.505181 0.026772 0.667264 C -1.755952 -0.153672 -0.228858 C -3.062631 0.374401 0.384731 C -4.269029 0.192827 -0.543030 H -4.437884 -0.866930 -0.771085 H -5.186165 0.585335 -0.088851 H -4.119462 0.715004 -1.496294 H …	0	0	0	0	0	5	0	0	0	0	0	0	0	5	0	1	1	11	0
538	3501	CC[C@H](C)CC(CC)(CC)CC	C12H26	38	-70.021	C 3.544445 -0.462286 -0.460250 H 3.633194 -1.358664 0.163442 H 3.877731 0.392084 0.139523 H 4.251436 -0.573060 -1.290704 C 2.120577 -0.271331 -0.999420 C 0.990465 -0.063671 0.049919 C -0.335510 0.085205 -0.760135 C -1.670632 0.288465 0.012567 C -2.785521 -0.579901 -0.614122 C -4.125373 -0.564016 0.130508 H -4.598548 0.423546 0.110973 H -4.829779 -1.272183 -0.321013 H -3.996725 -0.850370 1.182244 …	0	0	0	0	0	5	0	0	0	0	0	0	0	5	0	1	1	10	1
539	3502	CCC(CC)(CC)CCC(C)C	C12H26	38	-72.6436	C 3.632210 -0.216149 0.691337 H 3.962611 0.725607 0.239173 H 3.869591 -1.022490 -0.011563 H 4.241601 -0.377151 1.588272 C 2.143537 -0.190632 1.062184 C 1.125117 0.022299 -0.095010 C -0.288685 0.008655 0.557084 C -1.497415 0.178903 -0.376681 C -2.855954 0.277830 0.350347 C -3.969029 0.648794 -0.641410 H -4.087314 -0.129490 -1.406951 H -4.934153 0.762311 -0.133263 H -3.748147 1.591021 -1.157271 H 1…	0	0	0	0	0	5	0	0	0	0	0	0	0	5	0	1	1	9	0
540	3503	CCC[C@@H](CC)C(C)(CC)CC	C12H26	38	-68.2059	C 3.616140 0.273691 -0.103779 H 3.844271 -0.716317 -0.513044 H 3.890368 0.266912 0.956968 H 4.276789 0.991009 -0.604608 C 2.149594 0.673964 -0.321421 C 1.061094 -0.185406 0.391767 C -0.351995 0.345075 -0.068564 C -1.537105 -0.526275 0.411900 C -2.881592 -0.193401 -0.254739 C -4.018646 -1.104010 0.222225 H -4.172821 -1.011658 1.304522 H -4.965233 -0.854447 -0.270911 H -3.799784 -2.157813 0.009526 …	0	0	0	0	0	5	0	0	0	0	0	0	0	5	0	1	1	10	0
541	3504	CCC[C@@](C)(CC)C(CC)CC	C12H26	38	-68.088	C 3.584250 -0.424309 -0.348286 H 3.924666 0.584506 -0.090242 H 3.474298 -0.468156 -1.439216 H 4.383573 -1.120370 -0.068287 C 2.271169 -0.794519 0.355401 C 1.076786 0.114914 -0.020293 C -0.319824 -0.419891 0.483905 C -1.428448 0.488120 -0.131412 C -2.894984 0.099628 0.119562 C -3.869725 1.133755 -0.457286 H -3.732924 1.247599 -1.539936 H -4.911677 0.841619 -0.282688 H -3.718950 2.120045 -0.001149 …	0	0	0	0	0	5	0	0	0	0	0	0	0	5	0	1	1	10	0
542	3505	CC[C@H](C)[C@@H](CC)C(CC)CC	C12H26	38	-68.1858	C 3.783697 0.105531 0.435580 H 4.054313 -0.905825 0.113847 H 3.785165 0.116002 1.533025 H 4.580645 0.778314 0.098072 C 2.426011 0.554115 -0.121551 C 1.203004 -0.223327 0.423283 C -0.130834 0.407458 -0.092403 C -1.401200 -0.425768 0.261322 C -2.643013 0.095179 -0.498355 C -3.855833 -0.843435 -0.455149 H -4.248038 -0.965318 0.560447 H -4.671867 -0.454052 -1.074839 H -3.599147 -1.840858 -0.833939 H …	0	0	0	0	0	5	0	0	0	0	0	0	0	4	0	3	0	8	0
543	3506	CCC(CC)[C@H](CC)CC(C)C	C12H26	38	-70.8754	C -3.915136 0.311781 -0.138328 H -4.198678 -0.745691 -0.162297 H -3.966043 0.692428 -1.166505 H -4.677223 0.839846 0.446518 C -2.523013 0.533965 0.468420 C -1.339709 -0.000004 -0.375754 C 0.035093 0.272516 0.316419 C 1.212857 -0.250323 -0.543930 C 2.642721 -0.037735 -0.000854 C 2.855239 -0.700466 1.368873 H 2.665968 -1.780936 1.312485 H 3.886781 -0.563451 1.714893 H 2.191947 -0.286853 2.136361 H …	0	0	0	0	0	5	0	0	0	0	0	0	0	4	0	3	0	7	0
544	3507	CCC(CC)C[C@@H](CC)C(C)C	C12H26	38	-71.4042	C -3.665907 -0.308360 0.321272 H -3.887933 0.725017 0.604430 H -3.589289 -0.899258 1.243916 H -4.529319 -0.685564 -0.239338 C -2.382909 -0.430409 -0.520388 C -1.108572 0.001316 0.267158 C 0.152307 -0.061111 -0.629695 C 1.506527 0.317388 0.013857 C 2.611316 0.279359 -1.066094 C 3.988196 0.772654 -0.605977 H 4.428078 0.118878 0.155290 H 4.689538 0.811354 -1.447496 H 3.926111 1.782090 -0.179927 H -2…	0	0	0	0	0	5	0	0	0	0	0	0	0	4	0	3	0	7	0
545	3508	CCC(CC)CC(C)(CC)CC	C12H26	38	-70.4773	C -2.831406 0.825638 -1.631653 H -2.057464 1.374714 -2.178628 H -3.199296 1.477851 -0.831477 H -3.664064 0.660408 -2.325270 C -2.319887 -0.516747 -1.091935 C -1.132676 -0.477665 -0.085897 C 0.107833 0.135453 -0.804218 C 1.484574 0.083404 -0.081008 C 2.256251 1.411637 -0.257724 C 1.696813 2.590970 0.545962 H 1.725387 2.381662 1.622522 H 2.282902 3.500314 0.369029 H 0.656749 2.814586 0.282379 H -2.…	0	0	0	0	0	5	0	0	0	0	0	0	0	5	0	1	1	9	1
546	3509	CCC(CC)C(C)C(CC)CC	C12H26	38	-68.4245	C 3.164827 -1.374164 -0.070237 H 2.496303 -2.207781 0.174073 H 3.531175 -0.960141 0.875792 H 4.029613 -1.791145 -0.599331 C 2.470457 -0.309501 -0.931567 C 1.188203 0.321961 -0.331977 C -0.001710 -0.682506 -0.181928 C -1.368515 0.044995 0.046351 C -2.392739 -0.854847 0.778005 C -2.097769 -1.083994 2.265673 H -2.075794 -0.133624 2.813500 H -2.868363 -1.713765 2.725333 H -1.133376 -1.578982 2.426370…	0	0	0	0	0	5	0	0	0	0	0	0	0	4	0	3	0	8	0
547	3510	CCCC(CC)(CC)CC(C)C	C12H26	38	-70.5201	C -3.326372 -1.078298 -0.895017 H -2.941879 -2.104840 -0.867660 H -3.395376 -0.777994 -1.948987 H -4.344298 -1.090050 -0.486761 C -2.419024 -0.115151 -0.109557 C -0.985820 -0.112480 -0.711059 C 0.243513 -0.013959 0.245563 C 1.504186 -0.066221 -0.666019 C 2.879179 -0.001218 0.016254 C 4.029834 -0.030775 -0.997169 H 3.972017 0.819017 -1.688670 H 5.004471 0.012288 -0.497450 H 4.004635 -0.947235 -1.5…	0	0	0	0	0	5	0	0	0	0	0	0	0	5	0	1	1	9	1
548	3511	CCCC(CC)(CC)[C@H](C)CC	C12H26	38	-66.7173	C -3.778743 0.449275 0.441718 H -3.677038 1.513833 0.687376 H -3.988705 -0.086257 1.373974 H -4.659978 0.340705 -0.201255 C -2.521053 -0.076088 -0.264394 C -1.218081 0.080733 0.558882 C 0.091929 0.071650 -0.329858 C 1.338988 -0.073494 0.589156 C 2.723716 0.043798 -0.070000 C 3.859176 -0.126542 0.946857 H 3.809181 -1.106149 1.438333 H 4.841306 -0.044688 0.467012 H 3.807319 0.638159 1.731916 H -2.4…	0	0	0	0	0	5	0	0	0	0	0	0	0	5	0	1	1	11	0
549	3512	CCC[C@@H](C)[C@@](C)(CC)C(C)C	C12H26	38	-67.1168	C -0.807488 2.276150 -0.641610 H -1.347057 2.286992 -1.595913 H 0.263274 2.242673 -0.863931 H -1.006533 3.234704 -0.147586 C -1.267550 1.115745 0.261965 C -0.989686 -0.315713 -0.334085 C 0.535335 -0.471672 -0.740535 C 1.592114 -0.044289 0.313165 C 2.933564 0.393445 -0.299635 C 3.967714 0.793255 0.758240 H 4.193492 -0.045141 1.428819 H 4.909307 1.112921 0.297057 H 3.602211 1.621500 1.378035 H 2.75…	0	0	0	0	0	6	0	0	0	0	0	0	0	3	0	2	1	11	0
550	3513	CC[C@H](C)C[C@@](C)(CC)C(C)C	C12H26	38	-69.4972	C -2.386193 -0.066453 -1.768961 H -1.663324 -0.604262 -2.393573 H -2.277355 1.002361 -1.977291 H -3.386335 -0.363586 -2.106439 C -2.217488 -0.400299 -0.274833 C -0.841974 0.051692 0.345606 C 0.325877 -0.771875 -0.276180 C 1.776415 -0.446773 0.191939 C 2.540810 0.373833 -0.870873 C 3.889763 0.936599 -0.408048 H 4.603661 0.145096 -0.155125 H 4.347336 1.550512 -1.192493 H 3.769561 1.570503 0.479822 …	0	0	0	0	0	6	0	0	0	0	0	0	0	3	0	2	1	10	1
551	3514	CC[C@](C)(CCC(C)C)C(C)C	C12H26	38	-72.6822	C -2.227106 -2.040547 -0.613632 H -2.501893 -2.492861 0.346532 H -1.277706 -2.480456 -0.932818 H -2.987103 -2.345396 -1.342833 C -2.174069 -0.502505 -0.526669 C -1.028692 0.052375 0.400269 C 0.340900 -0.420781 -0.178515 C 1.611601 0.181703 0.445577 C 2.921176 -0.507223 0.005643 C 3.181919 -0.374713 -1.502809 H 3.251112 0.681901 -1.794878 H 4.126925 -0.856702 -1.780641 H 2.388768 -0.835278 -2.1012…	0	0	0	0	0	6	0	0	0	0	0	0	0	3	0	2	1	9	0
552	3515	CCCC(C)(C)[C@@H](CC)C(C)C	C12H26	38	-68.2245	C -2.594757 0.158410 1.687644 H -2.763325 1.236974 1.595008 H -1.947020 -0.000963 2.558030 H -3.563530 -0.309176 1.904085 C -1.969556 -0.441342 0.413971 C -0.532153 0.139941 0.136059 C 0.529834 -0.978898 -0.207551 C 1.948740 -0.384930 -0.465122 C 2.561006 0.508928 0.624177 C 3.984237 0.957999 0.271217 H 3.999897 1.527868 -0.666217 H 4.408476 1.595771 1.055240 H 4.652014 0.096951 0.143947 H 2.5815…	0	0	0	0	0	6	0	0	0	0	0	0	0	3	0	2	1	9	1
553	3516	CC[C@H](C)[C@H](C)[C@@H](CC)C(C)C	C12H26	38	-69.3229	C 2.160986 -2.030121 -0.761846 H 3.164565 -1.678629 -0.494518 H 2.000288 -1.803266 -1.822989 H 2.159796 -3.121170 -0.650621 C 1.066839 -1.396919 0.115613 C 0.939886 0.135659 -0.136033 C -0.300725 0.799306 0.546361 C -1.639540 0.012476 0.393679 C -2.124095 -0.105626 -1.067941 C -3.282824 -1.090703 -1.271747 H -4.190172 -0.773843 -0.746166 H -3.535681 -1.182177 -2.334411 H -3.020608 -2.091912 -0.90…	0	0	0	0	0	6	0	0	0	0	0	0	0	2	0	4	0	8	0
554	3517	CC[C@@H](C(C)C)[C@@H](C)CC(C)C	C12H26	38	-71.055	C 2.023252 -2.208624 -0.509507 H 1.727515 -2.145768 -1.565358 H 1.235625 -2.746674 0.026897 H 2.929669 -2.823642 -0.459234 C 2.291873 -0.810585 0.073530 C 1.095009 0.173520 -0.091960 C -0.277817 -0.430743 0.337456 C -1.444080 0.478213 -0.113776 C -2.874636 -0.076603 0.062028 C -3.902642 0.986658 -0.356269 H -3.797495 1.237317 -1.420159 H -4.928310 0.631893 -0.199109 H -3.776261 1.913056 0.216924 …	0	0	0	0	0	6	0	0	0	0	0	0	0	2	0	4	0	7	0
555	3518	CC[C@H](C[C@H](C)C(C)C)C(C)C	C12H26	38	-71.8786	C -2.865344 -1.538457 1.130934 H -3.769374 -0.948286 0.936319 H -2.525778 -1.301692 2.146504 H -3.157630 -2.595341 1.113927 C -1.765101 -1.256498 0.094494 C -1.268837 0.219611 0.160258 C 0.142517 0.379757 -0.457626 C 1.313678 -0.106383 0.429404 C 2.563048 -0.474672 -0.421775 C 3.167249 0.713257 -1.189052 H 3.579063 1.467335 -0.507569 H 3.987746 0.375220 -1.833226 H 2.428303 1.207746 -1.829008 H 2…	0	0	0	0	0	6	0	0	0	0	0	0	0	2	0	4	0	7	0
556	3519	CC[C@H](CCC(C)(C)C)C(C)C	C12H26	38	-73.9523	C 2.615989 -1.308621 1.333275 H 1.745204 -1.917456 1.603995 H 2.705810 -0.507027 2.075036 H 3.502945 -1.945946 1.430421 C 2.501308 -0.763513 -0.100585 C 1.345802 0.263747 -0.289796 C -0.023378 -0.273185 0.196896 C -1.221153 0.396236 -0.497485 C -2.639550 -0.008743 -0.012442 C -2.867511 -1.524722 -0.172610 H -2.202537 -2.109060 0.473071 H -3.898442 -1.791586 0.090950 H -2.695970 -1.843930 -1.20849…	0	0	0	0	0	6	0	0	0	0	0	0	0	3	0	2	1	6	0
557	3520	CCCC(C)(C)C(C)(CC)CC	C12H26	38	-66.3734	C 3.604689 -0.353807 -0.072237 H 3.823070 0.687570 -0.333487 H 3.740149 -0.959507 -0.974275 H 4.366021 -0.671699 0.649747 C 2.205823 -0.522733 0.541164 C 0.991567 -0.098441 -0.339565 C -0.383025 -0.531744 0.375892 C -1.582941 0.225588 -0.271659 C -3.001251 -0.254905 0.083094 C -4.079935 0.638276 -0.542071 H -3.993251 0.659784 -1.635648 H -5.086371 0.280850 -0.295392 H -3.996549 1.672311 -0.185089…	0	0	0	0	0	6	0	0	0	0	0	0	0	4	0	0	2	12	0
558	3521	CC[C@H](C)[C@H](C)C(C)(CC)CC	C12H26	38	-68.6702	C -2.566214 2.078409 0.627096 H -3.501741 1.523094 0.500300 H -2.437048 2.718299 -0.252759 H -2.696230 2.739435 1.491940 C -1.361604 1.152861 0.852943 C -0.981760 0.184833 -0.308941 C 0.184885 -0.756167 0.190372 C 1.532986 -0.026709 0.532605 C 2.550826 0.043869 -0.632839 C 3.639468 1.107633 -0.437514 H 4.237621 0.928452 0.462881 H 4.328779 1.123381 -1.289740 H 3.200992 2.109683 -0.347905 C -2.225…	0	0	0	0	0	6	0	0	0	0	0	0	0	3	0	2	1	11	1
559	3522	CCC(C)(CC)[C@@H](C)CC(C)C	C12H26	38	-71.6306	C 2.615237 2.161339 -0.093904 H 3.473703 1.635336 -0.525347 H 2.835563 2.346942 0.963151 H 2.551499 3.137857 -0.588038 C 1.300686 1.390884 -0.284788 C 1.187195 0.000920 0.410277 C -0.187141 -0.652307 -0.004776 C -1.427092 0.090916 0.560129 C -2.729778 -0.078003 -0.254740 C -3.943601 0.359193 0.579832 H -3.860687 1.415570 0.868172 H -4.877696 0.242524 0.017189 H -4.029401 -0.230402 1.500401 C 2.38…	0	0	0	0	0	6	0	0	0	0	0	0	0	3	0	2	1	10	0
560	3523	CCC(C)(C)CC(C)(CC)CC	C12H26	38	-68.3763	C -3.744058 -0.574079 -0.716480 H -4.101629 0.401639 -0.370239 H -3.980257 -1.309768 0.060251 H -4.332517 -0.839181 -1.602632 C -2.250598 -0.555755 -1.068142 C -1.237058 -0.285346 0.090656 C 0.150246 -0.154681 -0.624161 C 1.550200 -0.171452 0.081025 C 2.538610 0.376140 -0.997025 C 4.037979 0.339585 -0.673651 H 4.410040 -0.682810 -0.548847 H 4.607133 0.793899 -1.493056 H 4.281656 0.897739 0.237192…	0	0	0	0	0	6	0	0	0	0	0	0	0	4	0	0	2	10	2
561	3524	CCC(C)(CC)C[C@H](C)C(C)C	C12H26	38	-71.3435	C -2.896678 -1.436573 -1.311640 H -3.725682 -0.723205 -1.245319 H -3.100672 -2.249542 -0.606192 H -2.918107 -1.867817 -2.319240 C -1.538343 -0.771350 -1.049801 C -1.330849 -0.124858 0.348456 C 0.068632 0.560448 0.388896 C 1.326812 -0.354042 0.320862 C 2.354372 0.164976 -0.727899 C 2.983169 1.518538 -0.357863 H 3.631717 1.433588 0.522195 H 3.601022 1.894042 -1.182252 H 2.224053 2.278656 -0.140921 …	0	0	0	0	0	6	0	0	0	0	0	0	0	3	0	2	1	9	1
562	3525	CCC(C)(CC)CCC(C)(C)C	C12H26	38	-75.3882	C -3.933195 -0.608381 -0.626929 H -4.283496 0.371434 -0.283689 H -4.186498 -1.341781 0.146390 H -4.513361 -0.865752 -1.520735 C -2.434270 -0.603719 -0.954779 C -1.450050 -0.298912 0.211493 C -0.021108 -0.302815 -0.410203 C 1.147930 0.033017 0.529923 C 2.575680 -0.049152 -0.080656 C 3.579902 0.350253 1.019533 H 3.509278 -0.321560 1.884150 H 4.610945 0.307982 0.647147 H 3.394477 1.371779 1.374443 C…	0	0	0	0	0	6	0	0	0	0	0	0	0	4	0	0	2	8	0
563	3526	CC[C@@H](C)C(C)(C)C(CC)CC	C12H26	38	-67.603	C -2.416431 2.356128 0.120260 H -3.395976 1.866985 0.172220 H -2.217863 2.583525 -0.934766 H -2.497555 3.309515 0.655239 C -1.301880 1.484724 0.714916 C -1.147185 0.115282 0.009357 C 0.232259 -0.593815 0.303213 C 1.443551 0.314239 -0.152044 C 2.820373 -0.394609 -0.054778 C 4.002377 0.573279 0.091562 H 3.911337 1.169352 1.008109 H 4.951187 0.026700 0.144118 H 4.074685 1.271521 -0.749965 C -2.39346…	0	0	0	0	0	6	0	0	0	0	0	0	0	3	0	2	1	11	0
564	3527	CCC(CC)C(C)(C)CC(C)C	C12H26	38	-68.629	C -3.244941 -1.770773 -0.434405 H -3.753928 -1.059315 -1.095129 H -3.712045 -1.693862 0.555361 H -3.446009 -2.777152 -0.819714 C -1.736017 -1.504465 -0.351384 C -1.392353 -0.086515 0.166698 C 0.081648 0.055834 0.708729 C 1.102474 -0.343082 -0.397237 C 2.613684 -0.114103 -0.115933 C 3.450470 -1.267261 -0.694816 H 3.305269 -1.349707 -1.780154 H 4.521458 -1.113239 -0.514938 H 3.168808 -2.228433 -0.2…	0	0	0	0	0	6	0	0	0	0	0	0	0	3	0	2	1	9	1
565	3528	CCC(CC)[C@@H](C)C(C)(C)CC	C12H26	38	-69.8705	C -1.652446 2.619418 -0.582617 H -1.886362 2.404601 -1.632711 H -0.588316 2.876664 -0.528862 H -2.219170 3.511657 -0.291820 C -2.006803 1.426918 0.313671 C -1.243844 0.118485 -0.011938 C 0.238179 0.201166 0.495872 C 1.302316 -0.491861 -0.435516 C 2.730224 -0.397889 0.181141 C 3.282213 1.004806 0.469362 H 2.676229 1.549980 1.201413 H 4.297741 0.934113 0.876183 H 3.337262 1.617542 -0.436978 C -2.03…	0	0	0	0	0	6	0	0	0	0	0	0	0	3	0	2	1	10	1
566	3529	CCC(CC)[C@@H](C)[C@H](C)C(C)C	C12H26	38	-69.7283	C -1.811275 2.580343 -0.025665 H -1.573903 2.717381 -1.088092 H -0.911617 2.830639 0.547858 H -2.581314 3.314309 0.239010 C -2.297527 1.151949 0.249489 C -1.284010 0.041367 -0.114420 C -0.083803 -0.014991 0.886565 C 1.192650 -0.630460 0.225070 C 1.854011 0.356569 -0.787894 C 2.681517 1.468658 -0.120331 H 3.586051 1.071146 0.354491 H 3.001646 2.204951 -0.867053 H 2.111603 2.006029 0.646432 C -1.99…	0	0	0	0	0	6	0	0	0	0	0	0	0	2	0	4	0	8	0
567	3530	CCC(CC)[C@@H](C)CC(C)(C)C	C12H26	38	-72.5488	C -2.149460 2.356502 -0.819689 H -1.860409 2.169665 -1.861711 H -1.308129 2.856599 -0.327450 H -2.986206 3.064585 -0.830708 C -2.548608 1.054204 -0.114023 C -1.493674 -0.073985 -0.162087 C -0.152760 0.303041 0.537977 C 0.975813 -0.712326 0.196279 C 2.353695 -0.134530 -0.235832 C 2.229768 0.614009 -1.578243 H 1.555759 1.475423 -1.509140 H 3.207506 0.988923 -1.905300 H 1.846731 -0.048107 -2.364887 …	0	0	0	0	0	6	0	0	0	0	0	0	0	3	0	2	1	7	1
568	3531	CCC(CC)CC(C)(C)C(C)C	C12H26	38	-70.5949	C 2.110445 2.530615 0.071873 H 2.381224 2.451585 1.132065 H 1.069053 2.868912 0.023087 H 2.731821 3.317277 -0.371674 C 2.318156 1.193765 -0.648885 C 1.468669 0.024394 -0.099336 C -0.026772 0.188885 -0.496932 C -1.108886 -0.163911 0.565605 C -2.551260 -0.087171 -0.062544 C -2.862002 -1.192126 -1.090030 H -2.774689 -2.196848 -0.666211 H -3.889867 -1.081902 -1.455605 H -2.202286 -1.137114 -1.964281 …	0	0	0	0	0	6	0	0	0	0	0	0	0	3	0	2	1	9	1
569	3532	CCC(CC)C[C@H](C)C(C)(C)C	C12H26	38	-72.9203	C 3.026615 2.172414 0.580009 H 3.988822 1.705844 0.340275 H 2.867705 2.064761 1.660252 H 3.120303 3.242968 0.363819 C 1.868118 1.551802 -0.209904 C 1.653989 0.040605 0.033085 C 0.245412 -0.395242 -0.439020 C -0.910041 -0.028910 0.527257 C -2.298538 0.140236 -0.187994 C -2.667189 -1.098328 -1.030265 H -2.707999 -2.008732 -0.421095 H -3.655577 -0.967241 -1.487696 H -1.950327 -1.268534 -1.840999 C 2…	0	0	0	0	0	6	0	0	0	0	0	0	0	3	0	2	1	8	0
570	3533	CCC[C@H](CC)[C@H](C)C(C)(C)C	C12H26	38	-71.0824	C -3.193555 -0.794627 0.428925 H -3.630333 0.150093 0.777361 H -3.080051 -1.453431 1.295987 H -3.918682 -1.265047 -0.246246 C -1.854511 -0.559078 -0.304934 C -0.896871 0.304835 0.597716 C 0.525494 0.567296 -0.005506 C 1.593670 -0.482425 0.393740 C 2.770165 -0.575362 -0.589924 C 3.843149 -1.575209 -0.145819 H 3.424484 -2.583113 -0.033817 H 4.661856 -1.633864 -0.872329 H 4.275615 -1.289066 0.820929…	0	0	0	0	0	6	0	0	0	0	0	0	0	3	0	2	1	8	1
571	3534	CCC[C@](C)(CC)CC(C)(C)C	C12H26	38	-70.0611	C 3.043828 -0.160677 -1.562048 H 2.841506 0.782994 -2.083537 H 2.778615 -0.980722 -2.240947 H 4.123626 -0.216301 -1.377141 C 2.251629 -0.251669 -0.236338 C 0.740304 -0.260362 -0.641812 C -0.464360 -0.062082 0.338173 C -1.717673 -0.505591 -0.483127 C -3.105908 -0.277062 0.134312 C -4.225966 -0.852672 -0.741396 H -4.109682 -1.935387 -0.874212 H -5.211894 -0.675376 -0.296460 H -4.224023 -0.396595 -1…	0	0	0	0	0	6	0	0	0	0	0	0	0	4	0	0	2	8	2
572	3535	CC[C@H](C)[C@H](CC)CC(C)(C)C	C12H26	38	-73.0259	C 2.904811 -1.374594 -1.066972 H 3.226177 -0.670024 -1.844230 H 2.350480 -2.184014 -1.558153 H 3.806281 -1.810999 -0.619203 C 2.039700 -0.672487 -0.000241 C 0.805161 -0.057377 -0.720754 C -0.282435 0.629858 0.153445 C -1.499815 -0.311803 0.419374 C -2.423470 -0.470364 -0.809252 C -3.396540 -1.652861 -0.717831 H -4.096103 -1.547865 0.118809 H -3.993333 -1.740528 -1.633156 H -2.857224 -2.598741 -0.…	0	0	0	0	0	6	0	0	0	0	0	0	0	3	0	2	1	7	1
573	3536	CC[C@@H](CC(C)C)CC(C)(C)C	C12H26	38	-74.1888	C 2.623369 0.033392 1.256602 H 1.804866 0.272853 1.944779 H 3.135832 0.971001 1.007838 H 3.334426 -0.600401 1.800835 C 2.120829 -0.679891 -0.014547 C 1.159913 0.243374 -0.816440 C -0.200562 0.633922 -0.172014 C -1.338137 -0.271500 -0.704564 C -2.676621 -0.252801 0.064690 C -3.753351 -1.006836 -0.731769 H -3.472222 -2.059006 -0.872199 H -4.719022 -0.988646 -0.212380 H -3.897738 -0.566383 -1.725575…	0	0	0	0	0	6	0	0	0	0	0	0	0	3	0	2	1	6	1
574	3537	CCC[C@H](CC)C(C)(C)C(C)C	C12H26	38	-67.4924	C -2.960012 -1.299734 0.836727 H -3.731320 -0.527006 0.729047 H -2.687529 -1.357138 1.894336 H -3.423492 -2.256250 0.567168 C -1.746318 -1.032156 -0.074488 C -1.019967 0.344839 0.197280 C 0.415943 0.298278 -0.469646 C 1.425235 -0.560797 0.331634 C 2.685819 -0.970901 -0.446399 C 3.584798 -1.925143 0.347955 H 3.053303 -2.849662 0.605697 H 4.478145 -2.202615 -0.223391 H 3.919762 -1.465524 1.286186 H…	0	0	0	0	0	6	0	0	0	0	0	0	0	3	0	2	1	10	0
575	3538	CCC[C@](C)(CC)[C@@H](C)C(C)C	C12H26	38	-69.3532	C 2.561310 -1.317431 -1.514104 H 3.275490 -0.533822 -1.798706 H 1.844263 -1.427591 -2.336194 H 3.122466 -2.256131 -1.430368 C 1.850731 -0.975979 -0.191759 C 1.050823 0.367279 -0.331824 C -0.337227 0.405139 0.422175 C -1.275474 -0.658585 -0.225315 C -2.731337 -0.718443 0.266460 C -3.515228 -1.858335 -0.395588 H -3.062067 -2.832860 -0.175269 H -4.553014 -1.886373 -0.043877 H -3.536474 -1.744484 -1.…	0	0	0	0	0	6	0	0	0	0	0	0	0	3	0	2	1	10	1
576	3539	CC[C@H](C)[C@H](CC)[C@@H](C)C(C)C	C12H26	38	-68.7748	C -1.954420 -1.483516 -1.463442 H -1.810425 -2.454672 -0.971602 H -1.067002 -1.288239 -2.073397 H -2.805894 -1.583369 -2.146995 C -2.220886 -0.384408 -0.419059 C -0.986273 -0.147770 0.507773 C 0.192031 0.526614 -0.279048 C 1.615360 0.018505 0.116738 C 1.842813 -1.442250 -0.335123 C 3.299647 -1.916866 -0.256616 H 3.668434 -1.952000 0.774227 H 3.403136 -2.925074 -0.674154 H 3.963886 -1.253302 -0.82…	0	0	0	0	0	6	0	0	0	0	0	0	0	2	0	4	0	8	0
577	3540	CC[C@@H](CC(C)C)[C@@H](C)C(C)C	C12H26	38	-71.5503	C -2.283203 -0.443485 -1.785406 H -1.901158 -1.465579 -1.910969 H -1.581851 0.238082 -2.276583 H -3.233045 -0.379266 -2.329259 C -2.491921 -0.110190 -0.297736 C -1.206830 -0.308964 0.558464 C 0.066941 0.388175 -0.014611 C 1.355185 -0.102799 0.708426 C 2.515976 -0.532146 -0.217237 C 3.821471 -0.670251 0.580078 H 3.721064 -1.428665 1.367889 H 4.654051 -0.973209 -0.066264 H 4.097745 0.274905 1.06299…	0	0	0	0	0	6	0	0	0	0	0	0	0	2	0	4	0	7	0
578	3541	CC[C@@H](C)[C@](C)(CC)CC(C)C	C12H26	38	-69.3906	C 2.794413 -1.608422 0.743759 H 2.697835 -2.492400 0.099388 H 2.172624 -1.775017 1.628552 H 3.838759 -1.553989 1.074946 C 2.391246 -0.336288 -0.021849 C 0.901249 -0.357363 -0.463956 C -0.156257 0.343038 0.445614 C -1.583789 0.073071 -0.170648 C -2.044240 -1.403770 -0.054273 C -3.078185 -1.814192 -1.111281 H -2.664973 -1.718069 -2.123021 H -3.384556 -2.857979 -0.975581 H -3.984458 -1.199668 -1.065…	0	0	0	0	0	6	0	0	0	0	0	0	0	3	0	2	1	10	1
579	3542	CCC(C)(CC(C)C)CC(C)C	C12H26	38	-70.1715	C 3.012104 -0.641986 -1.708635 H 3.665805 0.234864 -1.806539 H 2.290447 -0.611291 -2.533661 H 3.635009 -1.535400 -1.838748 C 2.302642 -0.647296 -0.344325 C 1.432705 0.629592 -0.170885 C 0.028550 0.480022 0.489385 C -0.901633 -0.282435 -0.500166 C -2.344043 -0.630533 -0.039057 C -2.450727 -2.055641 0.530279 H -1.766411 -2.219930 1.368217 H -3.468028 -2.263302 0.884117 H -2.211784 -2.797677 -0.2431…	0	0	0	0	0	6	0	0	0	0	0	0	0	3	0	2	1	8	2
580	3543	CCC[C@](C)(CC)C(C)(C)CC	C12H26	38	-66.3914	C 3.734067 -0.112221 -0.056137 H 3.887272 -0.122719 -1.140973 H 3.939541 -1.119912 0.319453 H 4.492510 0.554699 0.370324 C 2.331777 0.379474 0.335571 C 1.117811 -0.404503 -0.251374 C -0.239566 0.050010 0.483851 C -1.473529 -0.410078 -0.350396 C -2.865506 -0.234513 0.281835 C -3.982527 -0.704735 -0.658152 H -3.866343 -1.765417 -0.913622 H -4.969941 -0.579443 -0.198959 H -3.977597 -0.137775 -1.5974…	0	0	0	0	0	6	0	0	0	0	0	0	0	4	0	0	2	12	0
581	3544	CC[C@H](C)[C@H](CC)C(C)(C)CC	C12H26	38	-63.0042	C -3.023986 -0.800018 1.505056 H -3.407559 -1.674532 0.967976 H -3.720922 0.027667 1.336664 H -3.055168 -1.037475 2.574893 C -1.586907 -0.447292 1.090690 C -1.345928 -0.134908 -0.415699 C 0.161197 0.325576 -0.686840 C 1.282555 -0.444051 0.104283 C 2.694649 0.114358 -0.221463 C 3.858550 -0.553200 0.526291 H 4.048231 -1.578229 0.193033 H 4.783519 0.013729 0.369167 H 3.671019 -0.583013 1.607473 C 0.…	0	0	0	0	0	6	0	0	0	0	0	0	0	3	0	2	1	10	1
582	3545	CC[C@H](C)[C@@](C)(CC)[C@H](C)CC	C12H26	38	-67.0836	C 3.029119 -1.876256 -0.521308 H 3.920166 -1.240535 -0.569811 H 2.663390 -2.009310 -1.547375 H 3.349109 -2.858476 -0.154435 C 1.939064 -1.283241 0.382082 C 1.427523 0.107394 -0.076487 C -0.009107 0.459396 0.469779 C -1.081134 -0.598439 -0.029643 C -2.544628 -0.150636 0.218330 C -3.554296 -1.305807 0.266089 H -3.296800 -2.020992 1.057364 H -4.563402 -0.931188 0.473768 H -3.601467 -1.859856 -0.6777…	0	0	0	0	0	6	0	0	0	0	0	0	0	3	0	2	1	12	0
583	3546	CCC[C@@H](C)C(C)(C)C(C)(C)C	C12H26	38	-66.287	C 3.103155 -0.961687 -0.277035 H 2.964165 -1.638014 -1.125458 H 3.155048 -1.567599 0.634515 H 4.081634 -0.482914 -0.402442 C 2.004051 0.131651 -0.199792 C 0.585442 -0.504893 0.203121 C -0.654123 0.421146 -0.144466 C -2.019575 -0.173001 0.313277 C -3.195181 0.217288 -0.596316 C -4.544359 -0.296127 -0.082223 H -4.775461 0.118032 0.906998 H -5.361923 -0.019838 -0.758039 H -4.544265 -1.389395 0.01032…	0	0	0	0	0	7	0	0	0	0	0	0	0	2	0	1	2	11	1
584	3547	CC[C@H](C)CC(C)(C)C(C)(C)C	C12H26	38	-70.5517	C 2.424711 1.136904 -1.161345 H 2.652279 2.007350 -0.537515 H 1.595232 1.406184 -1.824404 H 3.300768 0.954407 -1.795370 C 2.121364 -0.121658 -0.314892 C 0.746372 0.027243 0.486136 C -0.459817 -0.108946 -0.497683 C -1.882630 0.221575 0.039894 C -2.895117 -0.834100 -0.457991 C -4.321385 -0.677778 0.081401 H -4.796298 0.245689 -0.266957 H -4.953741 -1.512558 -0.242307 H -4.329977 -0.662388 1.178877 …	0	0	0	0	0	7	0	0	0	0	0	0	0	2	0	1	2	10	1
585	3548	CC(C)CCC(C)(C)C(C)(C)C	C12H26	38	-73.0434	C -2.236195 1.379056 1.138992 H -1.306798 1.937958 1.294273 H -2.474061 0.857883 2.071977 H -3.031068 2.114453 0.965436 C -2.150952 0.408358 -0.062218 C -0.902141 -0.577833 0.069465 C 0.423165 0.198584 -0.209769 C 1.736099 -0.517132 0.155205 C 3.006180 0.186505 -0.368942 C 3.195691 1.589906 0.227430 H 3.270727 1.541244 1.322159 H 4.116574 2.053022 -0.146759 H 2.365804 2.259996 -0.020798 H 2.89993…	0	0	0	0	0	7	0	0	0	0	0	0	0	2	0	1	2	9	0
586	3549	CCCC(C)(C)[C@@H](C)C(C)(C)C	C12H26	38	-65.6628	C 2.714119 0.917666 -0.031725 H 2.316206 1.770526 0.526363 H 2.730503 1.186146 -1.094178 H 3.755900 0.781622 0.285195 C 1.915031 -0.376773 0.223801 C 0.441000 -0.362027 -0.371619 C -0.559284 0.823824 -0.027820 C -2.030847 0.376510 -0.323577 C -2.603485 -0.822200 0.448958 C -4.084982 -1.056853 0.127834 H -4.234206 -1.247203 -0.942308 H -4.481091 -1.918547 0.677379 H -4.692418 -0.183141 0.394549 H …	0	0	0	0	0	7	0	0	0	0	0	0	0	2	0	1	2	10	2
587	3550	CC[C@H](C)[C@H](C)[C@@H](C)C(C)(C)C	C12H26	38	-70.5493	C 3.077541 1.220728 -0.485764 H 3.388713 1.570247 0.503843 H 2.633868 2.070284 -1.020683 H 3.984795 0.926646 -1.027396 C 2.094940 0.031290 -0.405357 C 0.708431 0.508699 0.170634 C -0.341033 -0.655497 0.310306 C -1.679122 -0.330430 -0.425624 C -2.459493 0.854915 0.181573 C -3.665072 1.313545 -0.650037 H -4.444158 0.545801 -0.706559 H -4.120719 2.210066 -0.213894 H -3.366417 1.560142 -1.676945 H -1…	0	0	0	0	0	7	0	0	0	0	0	0	0	1	0	3	1	9	1
588	3551	CC(C)C[C@H](C)[C@@H](C)C(C)(C)C	C12H26	38	-72.8851	C -2.597837 0.486815 1.337056 H -1.807083 0.932700 1.949883 H -2.819038 -0.508608 1.739447 H -3.498050 1.099645 1.470744 C -2.209817 0.432185 -0.154225 C -0.979544 -0.507174 -0.439879 C 0.318952 -0.154562 0.367099 C 1.559608 -0.346335 -0.537838 C 2.937859 0.004916 0.060335 C 4.047602 -0.320703 -0.951806 H 3.941177 0.286251 -1.860643 H 5.040371 -0.118170 -0.532283 H 4.018627 -1.375200 -1.251734 H …	0	0	0	0	0	7	0	0	0	0	0	0	0	1	0	3	1	8	1
589	3552	CCC(C)(C)C[C@@H](C)C(C)(C)C	C12H26	38	-73.8243	C -1.771333 -1.475984 1.126254 H -1.613006 -1.027484 2.114938 H -0.877171 -2.056730 0.877346 H -2.605001 -2.183534 1.212548 C -2.090199 -0.394970 0.071040 C -0.904894 0.636411 -0.012336 C 0.428693 0.010824 -0.518626 C 1.738970 0.383121 0.237598 C 2.957733 -0.181045 -0.548524 C 3.020864 -1.698706 -0.766214 H 2.179498 -2.067394 -1.362813 H 3.939283 -1.963587 -1.302873 H 3.027168 -2.250822 0.180164 …	0	0	0	0	0	7	0	0	0	0	0	0	0	2	0	1	2	9	1
590	3553	CC[C@@H](C)C(C)(C)CC(C)(C)C	C12H26	38	-69.3442	C -2.749237 -0.035644 1.231757 H -2.553976 1.009948 1.490575 H -2.353782 -0.664503 2.038107 H -3.838666 -0.166878 1.213984 C -2.147801 -0.420497 -0.133582 C -0.584017 -0.476727 -0.146877 C 0.356836 0.660462 0.368736 C 1.826096 0.378425 -0.147680 C 2.361104 -1.032146 0.204701 C 3.892636 -1.134417 0.207601 H 4.331965 -0.441144 0.935685 H 4.215172 -2.146805 0.477343 H 4.327511 -0.904433 -0.771390 C …	0	0	0	0	0	7	0	0	0	0	0	0	0	2	0	1	2	9	2
591	3554	CC(C)CC(C)(C)CC(C)(C)C	C12H26	38	-70.5139	C 3.071433 0.738532 -0.156204 H 2.746303 1.610140 0.420985 H 3.094191 1.021943 -1.215054 H 4.101706 0.513914 0.147870 C 2.170336 -0.488304 0.082049 C 0.724363 -0.336520 -0.491984 C -0.216556 0.888197 -0.241939 C -1.644169 0.466310 -0.716517 C -2.416550 -0.593115 0.117984 C -3.440239 0.049109 1.069729 H -4.212088 0.585444 0.502092 H -3.945218 -0.711778 1.677408 H -2.973722 0.765994 1.752858 C 2.16…	0	0	0	0	0	7	0	0	0	0	0	0	0	2	0	1	2	7	3
592	3555	CCC(C)(C)[C@H](C)CC(C)(C)C	C12H26	38	-74.2164	C 2.607724 1.498451 -0.015964 H 1.828918 2.146048 0.402069 H 2.735982 1.761759 -1.073092 H 3.545234 1.739308 0.500714 C 2.268572 0.005204 0.154386 C 0.981774 -0.400707 -0.623374 C -0.330861 0.380673 -0.318569 C -1.591912 -0.547909 -0.161335 C -2.886697 0.286616 0.067583 C -2.903768 1.241338 1.268838 H -2.141506 2.024241 1.188001 H -3.876729 1.741371 1.339955 H -2.739176 0.714734 2.215261 C 2.1226…	0	0	0	0	0	7	0	0	0	0	0	0	0	2	0	1	2	9	1
593	3556	CC(C)[C@@H](C)[C@H](C)CC(C)(C)C	C12H26	38	-73.7711	C -2.183455 1.348363 -1.180339 H -1.897670 1.012585 -2.185074 H -1.385646 2.000123 -0.806278 H -3.087580 1.961835 -1.278761 C -2.437682 0.147929 -0.246296 C -1.171512 -0.751484 -0.157831 C 0.097131 -0.144511 0.507368 C 1.377535 -0.438861 -0.334795 C 2.635238 0.354041 0.125532 C 3.833621 0.114613 -0.811554 H 3.590372 0.406915 -1.842029 H 4.695774 0.713129 -0.494553 H 4.151095 -0.932200 -0.826871 C…	0	0	0	0	0	7	0	0	0	0	0	0	0	1	0	3	1	7	1
594	3557	CC(CC(C)(C)C)CC(C)(C)C	C12H26	38	-73.8965	C 3.366046 -1.454000 -0.544677 H 3.424328 -1.422796 -1.640013 H 2.898407 -2.405246 -0.262255 H 4.391960 -1.456103 -0.156191 C 2.567632 -0.250996 0.005023 C 1.157203 -0.299930 -0.656385 C -0.035336 0.484296 -0.052935 C -1.334109 0.116215 -0.831320 C -2.601235 -0.226840 0.001421 C -3.765416 -0.458244 -0.983233 H -3.535788 -1.268732 -1.686183 H -4.685045 -0.729567 -0.450008 H -3.973747 0.444625 -1.5…	0	0	0	0	0	7	0	0	0	0	0	0	0	2	0	1	2	6	2
595	3558	C[C@@H](CCC(C)(C)C)C(C)(C)C	C12H26	38	-75.9461	C -3.818491 -0.365569 -1.011593 H -3.809937 -1.455395 -1.138492 H -3.670721 0.086822 -2.000167 H -4.816618 -0.078322 -0.658407 C -2.727356 0.089121 -0.021267 C -1.353492 -0.361822 -0.587745 C -0.101464 0.026091 0.217280 C 1.210731 -0.542975 -0.382496 C 2.483486 0.304006 -0.020388 C 3.755910 -0.394115 -0.547272 H 3.669612 -0.626762 -1.616493 H 4.628474 0.258094 -0.419922 H 3.965992 -1.327674 -0.01…	0	0	0	0	0	7	0	0	0	0	0	0	0	2	0	1	2	7	0
596	3559	CCCC(C)(C)C(C)(C)C(C)C	C12H26	38	-66.0598	C 2.495984 -1.849876 -0.449435 H 3.349101 -1.313268 -0.883758 H 1.964160 -2.349795 -1.263191 H 2.905971 -2.631432 0.201255 C 1.592485 -0.910906 0.378065 C 0.967483 0.293047 -0.451402 C -0.480386 0.714954 0.109330 C -1.533154 -0.377036 -0.265222 C -2.905020 -0.309211 0.428295 C -3.882284 -1.347662 -0.136131 H -3.490257 -2.365899 -0.020334 H -4.850609 -1.304144 0.375682 H -4.062612 -1.184215 -1.205…	0	0	0	0	0	7	0	0	0	0	0	0	0	2	0	1	2	12	1
597	3560	CC[C@H](C)[C@H](C)C(C)(C)C(C)C	C12H26	38	-68.501	C 2.735111 -1.615836 -0.552797 H 3.549478 -0.963359 -0.891051 H 2.279986 -2.070938 -1.437196 H 3.192200 -2.424090 0.030363 C 1.710995 -0.860391 0.317130 C 1.013905 0.354128 -0.411366 C -0.254411 0.810444 0.414692 C -1.424089 -0.235253 0.477396 C -2.515430 -0.062829 -0.607757 C -3.399228 -1.302947 -0.798218 H -3.944304 -1.568831 0.114288 H -4.143258 -1.135397 -1.585622 H -2.799308 -2.174421 -1.089…	0	0	0	0	0	7	0	0	0	0	0	0	0	1	0	3	1	11	1
598	3561	CC(C)C[C@H](C)C(C)(C)C(C)C	C12H26	38	-71.5461	C -2.356012 1.793285 0.338742 H -2.381098 2.183093 -0.685719 H -1.480440 2.221063 0.836528 H -3.243953 2.180313 0.852645 C -2.365516 0.252915 0.359999 C -1.080501 -0.408106 -0.268075 C 0.216268 0.100656 0.475986 C 1.522975 -0.591705 0.003205 C 2.808359 0.251764 0.166453 C 4.053530 -0.641529 0.055070 H 4.095483 -1.134354 -0.925381 H 4.974928 -0.058267 0.171448 H 4.052868 -1.426044 0.821204 C -3.69…	0	0	0	0	0	7	0	0	0	0	0	0	0	1	0	3	1	10	0
599	3562	CCC(C)(C)CC(C)(C)C(C)C	C12H26	38	-68.9559	C 2.480595 1.306571 -1.219889 H 1.684316 2.059596 -1.239650 H 2.449105 0.759894 -2.167470 H 3.434337 1.846495 -1.186638 C 2.360675 0.379891 0.004849 C 1.127783 -0.608794 -0.040729 C -0.182984 0.225001 -0.222048 C -1.629283 -0.327606 0.003575 C -2.622070 0.702107 -0.622024 C -2.594202 2.137220 -0.079553 H -1.634265 2.631576 -0.262484 H -3.367997 2.739222 -0.570068 H -2.789105 2.172978 0.998108 C 2…	0	0	0	0	0	7	0	0	0	0	0	0	0	2	0	1	2	10	2
600	3563	CC(C)C(C)(C)CCC(C)(C)C	C12H26	38	-75.8096	C -3.503961 0.622794 -0.884165 H -4.184056 0.434446 -0.045060 H -3.656228 -0.168537 -1.624515 H -3.816778 1.566257 -1.347127 C -2.037855 0.726324 -0.421953 C -1.453270 -0.614785 0.146476 C 0.035416 -0.449247 0.581685 C 1.020769 0.048316 -0.488387 C 2.520051 0.104307 -0.079745 C 3.056317 -1.300023 0.261492 H 2.900820 -1.996462 -0.572197 H 4.133256 -1.263038 0.467102 H 2.569032 -1.722606 1.147049 C…	0	0	0	0	0	7	0	0	0	0	0	0	0	2	0	1	2	8	0
601	3564	CC[C@H](C)C(C)(C)[C@@H](C)C(C)C	C12H26	38	-67.7899	C -3.351818 0.948261 0.785861 H -3.519246 1.715995 0.019140 H -2.942687 1.447703 1.672009 H -4.331760 0.535836 1.055532 C -2.405731 -0.153846 0.275323 C -1.011554 0.462964 -0.107065 C 0.242710 -0.410229 0.299832 C 1.577037 0.307487 -0.150553 C 2.871984 -0.441470 0.264367 C 4.080776 -0.117232 -0.624579 H 4.328053 0.950270 -0.617505 H 4.971102 -0.660285 -0.286647 H 3.891608 -0.405598 -1.666055 C -3…	0	0	0	0	0	7	0	0	0	0	0	0	0	1	0	3	1	11	1
602	3565	CCC(C)(C)[C@H](C)[C@@H](C)C(C)C	C12H26	38	-70.3172	C -3.361492 -0.357031 -1.159728 H -3.997623 -0.703994 -0.336935 H -3.054945 -1.236572 -1.739506 H -3.984770 0.269366 -1.809097 C -2.144856 0.433890 -0.650446 C -1.105237 -0.479319 0.069038 C 0.255251 0.273246 0.317695 C 1.513440 -0.510581 -0.217247 C 2.834286 0.257882 0.085738 C 2.965047 1.680852 -0.474089 H 2.201689 2.357886 -0.074951 H 3.942599 2.101396 -0.210806 H 2.886437 1.700895 -1.566494 C…	0	0	0	0	0	7	0	0	0	0	0	0	0	1	0	3	1	10	1
603	3566	CC(C)[C@H](C)[C@@H](C)[C@@H](C)C(C)C	C12H26	38	-71.0206	C -2.489956 1.774821 -0.491922 H -2.206124 1.733285 -1.552099 H -1.747621 2.387531 0.028670 H -3.448830 2.302780 -0.429614 C -2.616850 0.361044 0.102535 C -1.327430 -0.498611 -0.077465 C -0.013499 0.239411 0.340835 C 1.285149 -0.527894 -0.070352 C 2.590650 0.252195 0.283551 C 3.841903 -0.637744 0.177526 H 4.076262 -0.905340 -0.859370 H 4.717953 -0.116044 0.581274 H 3.718985 -1.569233 0.743698 C -…	0	0	0	0	0	7	0	0	0	0	0	0	0	0	0	5	0	8	0
604	3567	CC(C)[C@H](C)CC(C)(C)C(C)C	C12H26	38	-71.4705	C 3.737232 -0.102015 0.802743 H 4.240862 -0.643893 -0.006641 H 3.542055 -0.816114 1.612382 H 4.444334 0.645910 1.181243 C 2.440851 0.569205 0.322368 C 1.336908 -0.465391 -0.047159 C -0.045244 0.225726 -0.237917 C -1.281626 -0.442935 0.431921 C -2.606751 0.304633 0.024992 C -2.624364 1.805304 0.372656 H -1.922383 2.374497 -0.247917 H -3.623471 2.218250 0.189872 H -2.379334 2.000021 1.421280 C 2.74…	0	0	0	0	0	7	0	0	0	0	0	0	0	1	0	3	1	9	1
605	3568	CC(C)[C@H](C)C[C@@H](C)C(C)(C)C	C12H26	38	-73.9635	C 4.016749 0.765178 0.047652 H 4.362155 0.231749 0.941222 H 3.847420 1.812280 0.327791 H 4.836269 0.743202 -0.680661 C 2.747573 0.129847 -0.542535 C 1.506012 0.329691 0.373680 C 0.198385 -0.097301 -0.337222 C -1.084240 0.588493 0.201263 C -2.388802 -0.259161 -0.016666 C -3.628164 0.547940 0.426825 H -3.821100 1.403572 -0.228400 H -4.522675 -0.086460 0.407717 H -3.512380 0.926211 1.450720 C 3.0094…	0	0	0	0	0	7	0	0	0	0	0	0	0	1	0	3	1	8	0
606	3569	CCC(C)(C)C(C)(C)CC(C)C	C12H26	38	-69.0633	C 2.930950 -1.328100 0.867575 H 2.829077 -2.269397 0.311305 H 2.299743 -1.399820 1.758229 H 3.972833 -1.254084 1.202608 C 2.552518 -0.131960 -0.022481 C 1.070482 -0.180064 -0.491778 C 0.007851 0.622101 0.327612 C -1.469191 0.231294 -0.160266 C -1.860004 -1.178568 0.383564 C -3.114354 -1.829772 -0.218866 H -2.990807 -2.059579 -1.282265 H -3.326166 -2.774204 0.295922 H -4.004617 -1.199140 -0.115544…	0	0	0	0	0	7	0	0	0	0	0	0	0	2	0	1	2	11	1
607	3570	CC[C@H](C)C(C)(C)C(C)(C)CC	C12H26	38	-63.8409	C -3.718760 -0.868817 -0.689287 H -3.757145 -1.800627 -0.113361 H -3.433986 -1.128277 -1.716452 H -4.736162 -0.461557 -0.719325 C -2.737981 0.147533 -0.088902 C -1.285322 -0.401014 0.043703 C -0.172462 0.725889 -0.067427 C 1.335896 0.189184 0.138182 C 1.545793 -1.153276 -0.628199 C 2.985255 -1.684178 -0.721957 H 3.434824 -1.849483 0.263434 H 2.990044 -2.647962 -1.244473 H 3.642406 -1.009376 -1.27…	0	0	0	0	0	7	0	0	0	0	0	0	0	2	0	1	2	13	1
608	3571	CCC(CC)[C@H](CC)C(C)(C)C	C12H26	38	-65.977	C 0.264045 2.996831 -0.502750 H 0.803341 3.308622 0.400278 H -0.807406 3.032057 -0.273952 H 0.456489 3.745424 -1.280343 C 0.717355 1.602910 -0.957726 C 0.435834 0.477587 0.079319 C -1.082552 0.079478 -0.009161 C -1.724170 -0.428741 1.307508 C -1.613228 0.521398 2.507111 H 0.231960 1.358443 -1.912062 H 0.551478 0.948703 1.065029 H -1.980637 1.524616 2.256079 H -0.583678 0.627772 2.865818 H 1.78797…	0	0	0	0	0	6	0	0	0	0	0	0	0	3	0	2	1	9	1
609	3572	CCCC(CC)(CC)C(C)(C)C	C12H26	38	-64.518	C -1.900608 1.109400 1.843258 H -2.461609 0.181512 1.989394 H -2.472176 1.738973 1.152704 H -1.879578 1.626381 2.810300 C -0.462015 0.864230 1.362343 C -0.209631 0.300797 -0.073069 C 1.330173 0.427828 -0.336098 C 2.348328 -0.323025 0.541493 C 3.786938 0.104598 0.221287 H 0.071513 1.821655 1.426167 H 3.932567 1.176821 0.402110 H 4.033737 -0.088357 -0.830256 H 0.033296 0.217001 2.093339 H 1.533180 …	0	0	0	0	0	6	0	0	0	0	0	0	0	4	0	0	2	12	0
610	3573	CCCC(CC)(C(C)C)C(C)C	C12H26	38	-64.6816	C 2.610677 -0.336446 -1.511008 H 2.733765 -1.407633 -1.319496 H 3.201442 0.201869 -0.765628 H 3.059540 -0.133862 -2.491137 C 1.131831 0.084654 -1.535809 C 0.261286 0.002670 -0.228110 C -1.209958 -0.025329 -0.763767 C -2.399315 0.051005 0.208550 C -3.730618 0.203310 -0.538996 H 1.071873 1.111774 -1.915335 H -3.896311 -0.632949 -1.229666 H -3.750226 1.126945 -1.130940 H 0.640097 -0.523871 -2.305965…	0	0	0	0	0	6	0	0	0	0	0	0	0	3	0	2	1	12	0
611	3574	CCCC(C(C)(C)C)C(C)(C)C	C12H26	38	-64.9517	C 1.127018 -1.700330 1.456636 H 0.168386 -1.868626 1.956972 H 1.673463 -0.947762 2.030534 H 1.694059 -2.637067 1.526016 C 0.967648 -1.304026 -0.030333 C 0.059221 -0.020006 -0.271441 C -1.337870 -0.225184 0.402477 C -2.540169 -0.117998 -0.550396 C -3.881358 -0.330908 0.159620 H -4.042771 0.424969 0.938469 H -3.924172 -1.315095 0.642976 H -2.545476 0.857407 -1.050657 H -2.426746 -0.865655 -1.348157…	0	0	0	0	0	7	0	0	0	0	0	0	0	2	0	1	2	9	2
612	3575	CC(C)C[C@H](C(C)C)C(C)(C)C	C12H26	38	-70.451	C 0.222114 2.393357 -1.163962 H -0.220453 2.133946 -2.133203 H 1.298837 2.200645 -1.229902 H 0.090746 3.472710 -1.016713 C -0.440208 1.600908 -0.021264 C -0.368994 0.046668 -0.260654 C 0.808948 -0.641115 0.474925 C 2.242890 -0.303200 0.000758 C 3.265724 -0.923584 0.966243 H 3.168187 -2.017112 0.991129 H 3.125704 -0.554785 1.989559 H 2.387477 0.784517 0.027844 H 4.293144 -0.689569 0.662530 C -1.75…	0	0	0	0	0	7	0	0	0	0	0	0	0	1	0	3	1	8	1
613	3576	CC[C@H](C)[C@](C)(CC)C(C)(C)C	C12H26	38	-63.6394	C -0.799796 2.551264 -1.056605 H -0.650999 3.244786 -0.222194 H -1.829551 2.187731 -1.008589 H -0.706359 3.136215 -1.979587 C 0.238308 1.416418 -1.065642 C 0.343891 0.494496 0.190137 C -1.034363 -0.221233 0.541890 C -1.913189 -0.636865 -0.672787 C -2.775719 -1.877264 -0.400860 H -3.436121 -1.739986 0.463126 H -2.151829 -2.757421 -0.199976 H -1.303038 -0.835487 -1.556050 H -3.409991 -2.111506 -1.2…	0	0	0	0	0	7	0	0	0	0	0	0	0	2	0	1	2	13	1
614	3577	CC[C@H](C(C)(C)C)C(C)(C)CC	C12H26	38	-62.7893	C 1.027564 2.919696 -0.015986 H 1.915412 2.823095 0.620816 H 0.204930 3.263310 0.618466 H 1.231706 3.708755 -0.750269 C 0.710377 1.589814 -0.715562 C 0.438416 0.387454 0.250796 C -1.119280 0.076879 0.383405 C -1.684644 -0.626218 -0.881403 C -3.212575 -0.760474 -0.974413 H -3.710348 0.211687 -1.052683 H -3.634571 -1.283742 -0.108962 H -3.483436 -1.336864 -1.866702 C 1.488508 -0.776574 -0.029061 C …	0	0	0	0	0	7	0	0	0	0	0	0	0	2	0	1	2	11	2
615	3578	CC[C@@H](CC(C)(C)C)C(C)(C)C	C12H26	38	-73.0058	C 1.101530 2.770875 0.344465 H 2.017576 2.573943 0.909244 H 0.293815 2.918019 1.072235 H 1.238975 3.719002 -0.189350 C 0.760807 1.638547 -0.634465 C 0.502091 0.244633 0.015195 C -0.740545 -0.439611 -0.625300 C -2.136161 -0.178891 0.014730 C -3.187043 -0.894686 -0.859478 H -2.984837 -1.971149 -0.923669 H -3.192845 -0.494245 -1.880883 H -4.195225 -0.768944 -0.445613 C 1.766654 -0.697470 0.011786 C …	0	0	0	0	0	7	0	0	0	0	0	0	0	2	0	1	2	8	1
616	3579	CCC(CC)C(C(C)C)C(C)C	C12H26	38	-66.9476	C -2.623329 1.154782 -0.816869 H -3.221539 0.514107 -0.164495 H -2.659203 0.726283 -1.827213 H -3.117598 2.133029 -0.856475 C -1.166200 1.306177 -0.339250 C -0.426449 -0.069807 -0.282223 C 1.129266 0.065983 -0.166895 C 1.589282 0.648237 1.190476 C 3.032677 1.170697 1.210322 H 3.186972 1.934178 0.437260 H 3.767511 0.376352 1.040974 H 3.266811 1.628590 2.178422 C -1.005122 -1.081711 0.777313 C -1.9…	0	0	0	0	0	6	0	0	0	0	0	0	0	2	0	4	0	8	0
617	3580	CC[C@H](C(C)C)C(C)(CC)CC	C12H26	38	-66.4829	C -2.447435 1.963194 -0.147276 H -3.284001 1.262226 -0.221230 H -2.186715 2.273514 -1.167018 H -2.812074 2.850516 0.384072 C -1.228705 1.369403 0.576286 C -0.534372 0.194644 -0.158383 C 0.940027 -0.092992 0.352186 C 1.635411 -1.043129 -0.673556 C 3.120078 -1.362424 -0.442394 H 3.301204 -1.792471 0.548985 H 3.760160 -0.479727 -0.544736 H 3.461610 -2.096841 -1.181202 C -1.426670 -1.102853 -0.232298…	0	0	0	0	0	6	0	0	0	0	0	0	0	3	0	2	1	11	1
618	3581	CCC(CC)C(CC)(CC)CC	C12H26	38	-64.7448	C -3.205229 1.172167 0.420598 H -3.758380 0.247577 0.618652 H -3.335224 1.416087 -0.641346 H -3.681903 1.968767 1.003817 C -1.719425 1.048464 0.785424 C -0.949855 -0.013103 -0.037070 C 0.621646 0.063791 0.127620 C 1.245799 -1.004754 -0.835961 C 2.688724 -0.807366 -1.332066 H 3.412581 -0.718804 -0.517767 H 2.792593 0.081181 -1.963069 H 2.985208 -1.670565 -1.940240 C -1.542103 -1.435030 0.220924 C …	0	0	0	0	0	5	0	0	0	0	0	0	0	5	0	1	1	12	0
619	3582	CCC[C@@](C)(C(C)C)C(C)(C)C	C12H26	38	-64.156	C 2.785669 0.145333 -0.581391 H 2.745655 1.237755 -0.512001 H 2.838836 -0.120890 -1.641586 H 3.728995 -0.172674 -0.121520 C 1.600001 -0.547906 0.136187 C 0.184859 0.061096 -0.346966 C -0.969806 -0.872953 0.133279 C -2.411072 -0.556434 -0.310097 C -3.413449 -1.560970 0.272634 H -3.409105 -1.536885 1.369496 H -3.172324 -2.586211 -0.034944 H -4.434986 -1.344983 -0.061067 C 0.017996 1.546257 0.203529…	0	0	0	0	0	7	0	0	0	0	0	0	0	2	0	1	2	12	1
620	3583	CC[C@@H](C)[C@@H](C(C)C)C(C)(C)C	C12H26	38	-64.9351	C 2.366008 -1.041104 -1.177381 H 2.999374 -0.150752 -1.110067 H 1.954645 -1.083915 -2.193534 H 3.020429 -1.911735 -1.048192 C 1.237284 -1.061488 -0.115160 C 0.271918 0.163104 -0.384322 C -1.187675 0.154953 0.206771 C -2.201645 -0.597148 -0.694028 C -3.670280 -0.249110 -0.415880 H -3.843403 0.832130 -0.491276 H -3.991093 -0.567602 0.581975 H -4.329149 -0.740814 -1.141000 C 0.965157 1.561196 -0.177…	0	0	0	0	0	7	0	0	0	0	0	0	0	1	0	3	1	9	2
621	3584	CC[C@@H](C)C(C)(C(C)C)C(C)C	C12H26	38	-62.8211	C -2.733426 -1.165794 0.313233 H -3.342378 -0.273347 0.151988 H -2.701130 -1.363249 1.388531 H -3.267180 -2.004995 -0.150245 C -1.325939 -1.068183 -0.316967 C -0.269852 -0.131711 0.398966 C 1.176580 -0.491293 -0.154167 C 2.331190 0.268747 0.555629 C 3.591334 0.420341 -0.308155 H 3.381351 0.998746 -1.216666 H 3.999302 -0.546941 -0.622378 H 4.381378 0.944448 0.242189 C -0.512226 1.429277 0.247488 C…	0	0	0	0	0	7	0	0	0	0	0	0	0	1	0	3	1	13	0
622	3585	CC(C)CC(C)(C(C)C)C(C)C	C12H26	38	-66.5496	C -2.105351 -0.482958 -1.662736 H -1.298068 -0.558496 -2.400267 H -2.471723 0.546142 -1.669331 H -2.925782 -1.118027 -2.018494 C -1.661121 -0.948632 -0.262795 C -0.437379 -0.173817 0.372251 C 0.844157 -0.423810 -0.479984 C 2.202075 0.166927 -0.001390 C 3.074122 0.533831 -1.215382 H 2.587111 1.279399 -1.855059 H 3.272646 -0.352138 -1.833046 H 4.042452 0.942115 -0.901623 C -0.714471 1.378381 0.5324…	0	0	0	0	0	7	0	0	0	0	0	0	0	1	0	3	1	11	1
623	3586	CCC(C)(C)C(C(C)C)C(C)C	C12H26	38	-63.3524	C 2.265984 -0.460541 -1.653244 H 3.006048 0.092473 -1.065330 H 1.885056 0.211517 -2.430957 H 2.798408 -1.278496 -2.154222 C 1.126413 -1.029039 -0.784729 C 0.138857 0.085236 -0.284933 C -1.220990 -0.449343 0.335624 C -2.339174 0.635627 0.201028 C -2.795063 1.026716 -1.211525 H -3.200611 0.173257 -1.765373 H -1.985559 1.457678 -1.811059 H -3.587867 1.781467 -1.151206 C 0.739831 1.283231 0.541749 C …	0	0	0	0	0	7	0	0	0	0	0	0	0	1	0	3	1	10	2
624	3587	CC(C)[C@H](C)C(C(C)C)C(C)C	C12H26	38	-67.9993	C -1.067024 2.565700 -0.385860 H -0.664245 2.600019 -1.406966 H -0.298116 2.949579 0.291073 H -1.912212 3.263006 -0.344311 C -1.537034 1.145197 -0.017223 C -0.433779 0.055413 -0.219583 C 0.973891 0.505963 0.301198 C 2.156369 -0.375743 -0.207086 C 3.514906 0.160515 0.283543 H 3.614065 0.121253 1.372253 H 3.663950 1.202532 -0.030452 H 4.335166 -0.430840 -0.139978 C -0.822886 -1.376994 0.308011 C -1…	0	0	0	0	0	7	0	0	0	0	0	0	0	0	0	5	0	8	0
625	3588	CC(C)C(CC(C)(C)C)C(C)C	C12H26	38	-71.6431	C -1.899551 1.704858 1.260126 H -1.042057 2.239284 1.684898 H -2.176536 0.914031 1.961281 H -2.731680 2.418344 1.219773 C -1.599224 1.175721 -0.156229 C -0.567347 0.001714 -0.245688 C 0.677755 0.206321 0.661789 C 2.083666 -0.093132 0.059906 C 2.200114 -1.526105 -0.493597 H 1.517193 -1.698867 -1.332914 H 1.983556 -2.273894 0.279130 H 3.218250 -1.712968 -0.857640 C -1.200273 -1.417657 -0.073391 C -…	0	0	0	0	0	7	0	0	0	0	0	0	0	1	0	3	1	7	1
626	3589	CC[C@@](C)(CC(C)(C)C)C(C)C	C12H26	38	-68.6964	C 2.013349 2.362036 -0.143995 H 2.914316 1.889497 -0.548992 H 2.189745 2.556525 0.919610 H 1.906987 3.334456 -0.638938 C 0.749678 1.517987 -0.373090 C 0.688020 0.135463 0.336934 C -0.584953 -0.675929 -0.079914 C -2.045887 -0.112187 -0.129051 C -2.965528 -1.349741 -0.262361 H -2.890601 -1.999023 0.618569 H -2.701315 -1.949114 -1.142565 H -4.014657 -1.047416 -0.367482 C 1.965544 -0.717398 -0.036482…	0	0	0	0	0	7	0	0	0	0	0	0	0	2	0	1	2	10	2
627	3590	CC[C@H](C(C)C)C(C)(C)C(C)C	C12H26	38	-66.4868	C -2.814077 1.425839 -0.894879 H -3.491643 0.601401 -0.653999 H -2.560093 1.343654 -1.959200 H -3.375471 2.358393 -0.761251 C -1.546759 1.435527 -0.026015 C -0.596203 0.228882 -0.235851 C 0.870688 0.478639 0.316704 C 1.852128 -0.604374 -0.283260 C 3.201632 -0.711063 0.453865 H 3.085173 -1.012626 1.498917 H 3.758796 0.233659 0.436393 H 3.831551 -1.464291 -0.034180 C -1.210382 -1.140461 0.242001 C …	0	0	0	0	0	7	0	0	0	0	0	0	0	1	0	3	1	11	1
628	3591	CC[C@H](C(C)C)[C@H](C)C(C)(C)C	C12H26	38	-68.8087	C -0.782850 2.701251 -0.686949 H -0.737015 2.532070 -1.770142 H 0.238875 2.886182 -0.341857 H -1.358352 3.619917 -0.521281 C -1.442486 1.513965 0.027189 C -0.755889 0.140453 -0.189673 C 0.548119 -0.144760 0.660672 C 1.831759 -0.412155 -0.214458 C 2.247009 0.809781 -1.056752 H 2.461246 1.681911 -0.428562 H 1.474373 1.096209 -1.777758 H 3.158158 0.585723 -1.625326 C -1.766617 -1.040953 -0.028105 C …	0	0	0	0	0	7	0	0	0	0	0	0	0	1	0	3	1	9	1
629	3592	CC[C@@H](C)C(CC)(CC)C(C)C	C12H26	38	-63.885	C -2.975756 0.054534 -0.009796 H -3.178412 -0.793886 -0.673759 H -3.097108 0.971791 -0.592864 H -3.759590 0.052174 0.757316 C -1.594410 -0.050207 0.668601 C -0.364425 0.017921 -0.316327 C 0.992484 0.033613 0.494495 C 2.225397 0.303389 -0.405316 C 3.557325 -0.176759 0.187946 H 3.532407 -1.253865 0.396487 H 3.805453 0.334759 1.124233 H 4.382226 0.005597 -0.510646 H 1.118828 -0.984483 0.884224 H 2.0…	0	0	0	0	0	6	0	0	0	0	0	0	0	3	0	2	1	13	0
630	3593	CCC(CC)(CC(C)C)C(C)C	C12H26	38	-66.7305	C -2.888946 0.746509 0.471843 H -3.367175 0.053496 -0.226390 H -2.805714 1.716039 -0.027303 H -3.574725 0.877781 1.317931 C -1.532715 0.225090 0.991128 C -0.392550 0.037886 -0.088316 C 0.962137 0.056648 0.698472 C 2.293668 -0.143802 -0.081521 C 2.814514 -1.589337 0.002931 H 2.086025 -2.315993 -0.369260 H 3.044572 -1.854594 1.043405 H 3.735806 -1.710537 -0.580055 H 0.918749 -0.704176 1.488236 H 2.…	0	0	0	0	0	6	0	0	0	0	0	0	0	3	0	2	1	11	1
631	3594	CCC(C)(C)C(CC)(CC)CC	C12H26	38	-62.0706	C 2.551656 0.051160 1.851380 H 2.599471 1.118523 2.088675 H 3.317680 -0.157754 1.096330 H 2.837424 -0.492604 2.759654 C 1.151165 -0.400804 1.405066 C 0.586174 0.170334 0.062281 C -0.912891 -0.389164 -0.150193 C -1.919386 0.435444 0.715527 C -3.356590 -0.100082 0.818207 H -3.405483 -1.068765 1.325668 H -3.833844 -0.211854 -0.161736 H -3.969573 0.600803 1.397003 H -1.525793 0.519245 1.736623 C 0.63…	0	0	0	0	0	6	0	0	0	0	0	0	0	4	0	0	2	14	0
632	3595	CCC(CC)(CC)[C@@H](C)C(C)C	C12H26	38	-65.6465	C -3.255532 -0.071685 0.447762 H -3.447793 -0.883204 -0.263089 H -3.530457 0.868746 -0.041394 H -3.940878 -0.210644 1.292094 C -1.803095 -0.071942 0.947208 C -0.687200 0.045202 -0.131853 C 0.707327 0.219820 0.599363 C 1.956810 0.253800 -0.347417 C 2.661159 -1.099171 -0.560350 H 1.983954 -1.876855 -0.924734 H 3.121504 -1.465430 0.364376 H 3.463693 -0.989458 -1.299811 H 1.624507 0.596576 -1.335113 …	0	0	0	0	0	6	0	0	0	0	0	0	0	3	0	2	1	12	1
633	3596	CCC(CC)(CC)CC(C)(C)C	C12H26	38	-68.8797	C 3.378699 0.100022 0.578319 H 3.576915 0.951149 -0.082837 H 3.664977 -0.810423 0.040751 H 4.051448 0.193123 1.438902 C 1.920360 0.061990 1.054107 C 0.811893 -0.009911 -0.043740 C -0.532781 -0.094894 0.757530 C -1.977371 -0.018557 0.152601 C -2.925102 -0.516553 1.269929 H -2.796319 0.066849 2.190131 H -2.735882 -1.569343 1.513181 H -3.974133 -0.427353 0.962002 C 0.900940 1.231271 -0.975475 H 0.07…	0	0	0	0	0	6	0	0	0	0	0	0	0	4	0	0	2	10	2
634	3597	CCC(CC)[C@@](C)(CC)C(C)C	C12H26	38	-65.4818	C -1.269527 -2.215007 -0.488042 H -1.430796 -2.573598 0.535685 H -0.241267 -2.453512 -0.768919 H -1.929389 -2.800731 -1.139528 C -1.599323 -0.717510 -0.634323 C -0.719941 0.261636 0.234625 C 0.831779 0.056044 0.010654 C 1.478560 -1.174157 0.725398 C 2.625226 -0.797789 1.674474 H 2.269146 -0.149919 2.484956 H 3.423705 -0.258817 1.151586 H 3.069644 -1.689145 2.133753 C -1.108666 1.720817 -0.186374 …	0	0	0	0	0	6	0	0	0	0	0	0	0	3	0	2	1	12	0
635	3598	CC[C@@H](C(C)C)[C@H](CC)C(C)C	C12H26	38	-66.6618	C 3.110205 -0.249270 -0.801535 H 3.500414 0.738201 -0.527612 H 2.820883 -0.210535 -1.859025 H 3.939061 -0.961452 -0.708825 C 1.927233 -0.677717 0.084376 C 0.679559 0.238098 -0.133272 C -0.619560 -0.365329 0.494844 C -1.876727 0.550504 0.342200 C -2.983702 0.176115 1.344578 H -2.602308 0.153103 2.372714 H -3.422709 -0.805297 1.129048 H -3.799091 0.908780 1.308112 C 0.959519 1.693051 0.351084 H 2.0…	0	0	0	0	0	6	0	0	0	0	0	0	0	2	0	4	0	8	0
636	3599	CCC(C)(CC)C(C)(CC)CC	C12H26	38	-62.8491	C -2.984123 -1.464986 0.341490 H -3.627799 -0.579321 0.298598 H -2.917071 -1.778292 1.388282 H -3.499089 -2.264684 -0.203780 C -1.604179 -1.216532 -0.288170 C -0.733540 -0.080207 0.336630 C 0.733540 -0.080200 -0.336630 C 1.479493 1.288226 -0.199337 C 1.897589 1.806893 1.185360 H 2.478890 1.067943 1.747898 H 1.047250 2.104034 1.806193 H 2.532131 2.693508 1.066015 C -1.479493 1.288222 0.199364 H -0…	0	0	0	0	0	6	0	0	0	0	0	0	0	4	0	0	2	14	0
637	3600	CC[C@](C)(CC(C)C)C(C)(C)C	C12H26	38	-67.5743	C 1.801571 -1.947985 0.558784 H 1.974990 -2.486245 -0.378187 H 0.913121 -2.377727 1.035038 H 2.654554 -2.157149 1.215594 C 1.674889 -0.418677 0.345063 C 0.324187 -0.051314 -0.436006 C -0.888903 -0.139337 0.542872 C -2.326318 -0.041436 -0.046032 C -3.227907 0.797053 0.876291 H -2.842544 1.816904 0.994239 H -3.290562 0.348037 1.876417 H -4.248459 0.867308 0.480557 C 0.365842 1.361053 -1.107552 H -0…	0	0	0	0	0	7	0	0	0	0	0	0	0	2	0	1	2	11	1
638	3601	CC[C@H]([C@H](C)C(C)C)C(C)(C)C	C12H26	38	-65.823	C 2.116793 -1.772100 -0.650087 H 2.072344 -1.721981 -1.745328 H 1.423476 -2.549041 -0.326725 H 3.127084 -2.102665 -0.377987 C 1.827982 -0.382859 -0.027119 C 0.393955 0.147840 -0.480439 C -0.824228 -0.385645 0.359917 C -2.193597 0.245039 -0.062726 C -2.647439 -0.144041 -1.479622 H -2.840487 -1.220336 -1.559762 H -1.902621 0.117429 -2.239672 H -3.578500 0.373800 -1.739728 C 0.331662 1.694491 -0.654…	0	0	0	0	0	7	0	0	0	0	0	0	0	1	0	3	1	9	1
639	3602	CCC(C)(C)[C@@](C)(CC)C(C)C	C12H26	38	-61.8259	C 1.989252 -1.774753 -0.963431 H 2.900256 -1.172245 -1.047305 H 1.555031 -1.864038 -1.963069 H 2.294658 -2.781140 -0.651941 C 0.994738 -1.200854 0.069961 C 0.424130 0.250336 -0.261290 C -1.128163 0.350701 0.191758 C -2.019687 -0.515544 -0.759098 C -3.448260 -0.824895 -0.284838 H -4.017897 0.080578 -0.046462 H -3.461100 -1.468729 0.600616 H -3.994364 -1.350114 -1.077166 C 1.246791 1.370822 0.45000…	0	0	0	0	0	7	0	0	0	0	0	0	0	2	0	1	2	14	1
640	3603	CC[C@@](C)(C(C)C)[C@@H](C)C(C)C	C12H26	38	-66.3918	C -2.015405 -1.895817 -0.686045 H -2.229799 -2.442409 0.239595 H -1.133472 -2.352636 -1.144446 H -2.860327 -2.066811 -1.363807 C -1.850269 -0.384604 -0.426897 C -0.577222 -0.010988 0.424027 C 0.736336 -0.544476 -0.289168 C 2.081176 -0.156229 0.422405 C 2.777134 1.108703 -0.114425 H 2.127149 1.988247 -0.103478 H 3.132868 0.970708 -1.141827 H 3.653665 1.340743 0.502597 C -0.552893 1.521419 0.719282…	0	0	0	0	0	7	0	0	0	0	0	0	0	1	0	3	1	12	1
641	3604	CCC(C)(CC)C(C)(C)C(C)C	C12H26	38	-62.2989	C -3.220476 -1.009458 0.131709 H -3.590067 -0.417583 -0.711932 H -3.507341 -0.495728 1.055708 H -3.757428 -1.965421 0.114803 C -1.709231 -1.270830 0.040773 C -0.742911 -0.045856 0.142495 C 0.749348 -0.515235 -0.263248 C 1.828256 0.591435 0.116799 C 3.030151 0.669596 -0.848668 H 2.743311 0.931145 -1.870650 H 3.584104 -0.277026 -0.885832 H 3.730579 1.437600 -0.499453 C -1.196991 1.092214 -0.836677 …	0	0	0	0	0	7	0	0	0	0	0	0	0	2	0	1	2	14	1
642	3605	CCC(C)(CC)[C@H](C)C(C)(C)C	C12H26	38	-64.3219	C -2.383406 -2.170058 -0.522861 H -3.220500 -1.623463 -0.968821 H -2.645777 -2.394340 0.517089 H -2.304579 -3.126945 -1.052079 C -1.054449 -1.404821 -0.631394 C -0.935200 -0.071998 0.163141 C 0.454067 0.651980 -0.121545 C 1.839034 -0.097417 0.123639 C 2.917351 0.991893 0.359597 H 2.695236 1.575692 1.261448 H 3.005083 1.692094 -0.477115 H 3.901493 0.528330 0.499003 C -2.108473 0.867307 -0.269238 H…	0	0	0	0	0	7	0	0	0	0	0	0	0	2	0	1	2	12	2
643	3606	CCC(CC)C(C)(C)C(C)(C)C	C12H26	38	-63.9649	C 3.064964 -1.318467 -0.714209 H 3.495662 -0.456628 -1.236444 H 2.529905 -1.918901 -1.460126 H 3.894614 -1.925283 -0.331418 C 2.125698 -0.881967 0.417669 C 0.938711 0.022473 -0.055852 C -0.484869 -0.597450 0.282644 C -1.725786 0.281270 -0.244584 C -3.004341 -0.588311 -0.382496 H -3.234542 -1.139424 0.536296 H -2.937011 -1.309319 -1.202317 H -3.862272 0.061501 -0.592666 C 1.190123 1.472118 0.42687…	0	0	0	0	0	7	0	0	0	0	0	0	0	2	0	1	2	12	1
644	3607	CCC(C)(C)C(C)(C)C(C)(C)C	C12H26	38	-60.7944	C 2.969414 0.082028 0.030858 H 3.170191 0.726345 0.891510 H 3.176941 0.657149 -0.877343 H 3.697478 -0.736809 0.065163 C 1.533291 -0.515933 0.057092 C 0.437902 0.649548 -0.198268 C -1.110899 0.328882 0.175386 C -1.578931 -1.058133 -0.361120 C -3.081389 -1.376107 -0.268300 H -3.689563 -0.705257 -0.883173 H -3.459404 -1.324793 0.758468 H -3.261275 -2.396347 -0.627130 H -1.291066 -1.147106 -1.415282 …	0	0	0	0	0	8	0	0	0	0	0	0	0	1	0	0	3	14	2
645	3608	CC(C)[C@H](C)C(C)(C)C(C)(C)C	C12H26	38	-65.4506	C 3.067584 0.599489 -0.046026 H 3.202258 1.006105 0.961371 H 3.044829 1.438487 -0.748840 H 3.962565 0.009864 -0.278541 C 1.814410 -0.305236 -0.146707 C 0.458118 0.541671 0.021155 C -0.795556 -0.435832 0.196903 C -2.113584 -0.027434 -0.547061 C -2.911132 1.118853 0.100944 H -2.311646 2.024015 0.241398 H -3.311696 0.830792 1.079687 H -3.766164 1.387524 -0.531348 H -1.834580 0.300617 -1.553518 C 1.9…	0	0	0	0	0	8	0	0	0	0	0	0	0	0	0	2	2	12	2
646	3609	CC(C)(C)CC(C)(C)C(C)(C)C	C12H26	38	-69.2442	C 3.176838 0.583935 -0.039366 H 3.167663 1.316836 0.774516 H 3.273986 1.129066 -0.983488 H 4.084605 -0.019610 0.080364 C 1.935697 -0.340731 -0.023223 C 0.570578 0.503707 0.001890 C -0.617748 -0.463758 -0.336069 C -2.129817 -0.181344 -0.034204 C -2.910988 -1.293410 -0.775558 H -2.593006 -2.290764 -0.447060 H -2.757403 -1.234267 -1.860038 H -3.987644 -1.207168 -0.584663 C 2.063719 -1.249744 1.22195…	0	0	0	0	0	8	0	0	0	0	0	0	0	1	0	0	3	10	2
647	3610	C[C@@H]([C@@H](C)C(C)(C)C)C(C)(C)C	C12H26	38	-64.0753	C -3.220915 -0.509596 -0.527380 H -3.166841 -1.597752 -0.631834 H -3.332507 -0.078199 -1.530486 H -4.135283 -0.281523 0.033568 C -1.989210 0.073789 0.202504 C -0.709202 -0.064814 -0.713818 C 0.579645 0.627917 -0.086405 C 1.921966 -0.164556 0.200039 C 2.779366 0.699727 1.161774 H 2.249401 0.888058 2.103895 H 3.054698 1.667909 0.732795 H 3.712074 0.177599 1.406552 C -1.838516 -0.657863 1.551470 H -…	0	0	0	0	0	8	0	0	0	0	0	0	0	0	0	2	2	10	2
648	3611	CC(C)C(C)(C)[C@H](C)C(C)(C)C	C12H26	38	-64.4844	C 2.970834 0.029768 -1.105872 H 2.696553 0.590103 -2.008826 H 3.116766 -1.016767 -1.387954 H 3.939847 0.411301 -0.763374 C 1.913518 0.205683 0.016428 C 0.481566 -0.147725 -0.577086 C -0.808912 -0.188021 0.361840 C -2.072809 0.069717 -0.560312 C -2.220469 1.532796 -1.024637 H -1.292534 1.950452 -1.428946 H -2.549313 2.184447 -0.206917 H -2.977988 1.598305 -1.814554 C 2.019052 1.689808 0.445175 H 1…	0	0	0	0	0	8	0	0	0	0	0	0	0	0	0	2	2	12	2
649	3612	CC(C)C(C)(C)C(C)(C)C(C)C	C12H26	38	-62.1818	C -3.222498 0.736330 0.122861 H -3.096557 1.818872 0.207403 H -3.492294 0.349725 1.113797 H -4.081238 0.558400 -0.535345 C -1.978280 0.024559 -0.450832 C -0.672866 0.167722 0.448153 C 0.672865 0.167724 -0.448152 C 1.978280 0.024558 0.450832 C 3.222498 0.736329 -0.122861 H 3.096556 1.818871 -0.207403 H 3.492294 0.349725 -1.113797 H 4.081238 0.558400 0.535344 C -2.406336 -1.426546 -0.766589 H -2.82…	0	0	0	0	0	8	0	0	0	0	0	0	0	0	0	2	2	14	2
650	3613	CCC(CC)(C(C)C)C(C)(C)C	C12H26	38	-60.751	C 1.571311 -2.056140 -0.353333 H 0.761084 -2.559418 -0.884304 H 1.585715 -2.434841 0.674816 H 2.508558 -2.376160 -0.824590 C 1.474116 -0.516560 -0.403061 C 0.163158 0.125521 0.229101 C 0.336188 1.682197 0.229014 C 0.672029 2.409395 -1.083269 H 1.569408 2.014699 -1.570523 H 1.471425 -0.240712 -1.463140 H 1.122608 1.922262 0.954931 H -0.567465 2.139853 0.639759 H -0.143718 2.363371 -1.810714 H 0.85…	0	0	0	0	0	7	0	0	0	0	0	0	0	2	0	1	2	14	1
651	3614	CCC(C)(C(C)(C)C)C(C)(C)C	C12H26	38	-58.3435	C -1.871759 -1.515621 -0.565249 H -1.385651 -2.361338 -0.072388 H -1.637204 -1.559466 -1.633529 H -2.953562 -1.671143 -0.469018 C -1.499929 -0.153662 0.067124 C 0.032165 0.316339 -0.202003 C 0.292485 1.567700 0.720995 C 1.168538 2.724200 0.203796 H 2.184225 2.426469 -0.063979 H 0.691459 1.226859 1.683690 H -0.669652 2.024992 0.965503 H 0.724725 3.209329 -0.671656 H 1.248549 3.488472 0.986627 C 1.…	0	0	0	0	0	8	0	0	0	0	0	0	0	1	0	0	3	14	2
652	3615	CC(C)C(C)(C(C)C)C(C)(C)C	C12H26	38	-56.8762	C 2.346532 -1.340749 0.864631 H 2.151389 -1.367425 1.940143 H 3.066097 -0.541249 0.677175 H 2.842298 -2.285768 0.610163 C 1.040647 -1.237763 0.036419 C 0.097944 0.021428 0.317063 C 0.582613 1.293508 -0.498004 C -0.203429 2.598033 -0.236169 H -1.263061 2.531067 -0.485607 H 0.445770 1.055460 -1.559330 H -0.123176 2.921769 0.808020 H 0.217208 3.401699 -0.852262 C -1.452536 -0.351882 -0.049863 C -2.4…	0	0	0	0	0	8	0	0	0	0	0	0	0	0	0	2	2	14	2
653	3616	CCC(C(C)C)(C(C)C)C(C)C	C12H26	38	-60.3805	C -0.485298 1.923529 -1.633896 H -0.318312 1.213880 -2.449927 H 0.432338 2.507875 -1.503506 H -1.264550 2.621831 -1.962804 C -0.920565 1.242169 -0.321308 C -0.023316 0.020667 0.136277 C -0.549730 -0.484198 1.518676 C -2.020161 -0.911268 1.660725 H -2.724153 -0.156994 1.294333 H -0.363403 0.304905 2.255710 H -2.235379 -1.847429 1.137829 H -2.247531 -1.078846 2.720603 C -0.078613 -1.120352 -0.96112…	0	0	0	0	0	7	0	0	0	0	0	0	0	1	0	3	1	14	0
654	3617	CC(C)C(C(C)(C)C)C(C)(C)C	C12H26	38	-59.1895	C 2.287003 -1.054719 -1.044071 H 2.180787 -0.689414 -2.073036 H 1.913762 -2.083062 -1.017046 H 3.359204 -1.096289 -0.817099 C 1.567015 -0.109189 -0.045378 C 0.005165 -0.113003 -0.402577 C -0.885027 1.155329 -0.029505 C -2.367595 0.902426 -0.407539 H -2.472686 0.681208 -1.476019 H -2.831482 0.090679 0.153240 H -2.951685 1.808116 -0.204413 C -0.601006 -1.536464 -0.052308 H 0.259487 -2.211646 -0.044…	0	0	0	0	0	8	0	0	0	0	0	0	0	0	0	2	2	10	4
655	3618	CCCCCCCCCCCCC	C13H28	41	-77.0442	C 7.695649 0.385814 0.000000 H 7.742123 1.033051 0.884603 H 7.742123 1.033054 -0.884601 H 8.593724 -0.242580 -0.000001 C 6.418688 -0.460832 -0.000002 H 6.418163 -1.122496 -0.878008 H 6.418163 -1.122499 0.878002 C 5.134790 0.378944 0.000000 H 5.135943 1.041664 -0.878454 H 5.135943 1.041661 0.878456 C 3.851056 -0.460879 -0.000002 H 3.851042 -1.123451 0.878432 H 3.851042 -1.123448 -0.878438 C 2.5673…	0	0	0	0	0	2	0	0	0	0	0	0	0	11	0	0	0	0	0
656	3619	CCCCCCCCCCC(C)C	C13H28	41	-78.0151	C -6.527159 -0.852181 -0.122132 H -6.644110 -1.112175 0.938277 H -6.377279 -1.785453 -0.678193 H -7.471004 -0.407634 -0.459887 C -5.350825 0.115219 -0.322796 H -5.279469 0.337523 -1.399215 C -4.026328 -0.549077 0.103584 H -3.956906 -1.531568 -0.386414 H -4.061960 -0.753464 1.185107 C -2.755459 0.248473 -0.221042 H -2.763821 1.206487 0.316394 H -2.749068 0.499881 -1.292476 C -1.465026 -0.505674 0.…	0	0	0	0	0	3	0	0	0	0	0	0	0	9	0	1	0	1	0
657	3620	CCCCCCCCC[C@@H](C)CC	C13H28	41	-77.2244	C 6.693148 -0.432721 -0.463950 H 7.071926 0.496502 -0.024604 H 6.631689 -0.285990 -1.549753 H 7.442425 -1.210682 -0.277289 C 5.332484 -0.835554 0.116775 H 5.060843 -1.823899 -0.279681 C 4.176419 0.142690 -0.180875 H 4.130857 0.276221 -1.274295 C 2.834599 -0.473175 0.268225 H 2.838849 -0.579950 1.364219 H 2.769865 -1.495223 -0.133376 C 1.576904 0.295715 -0.161019 H 1.599315 0.447447 -1.250815 H 1.…	0	0	0	0	0	3	0	0	0	0	0	0	0	9	0	1	0	2	0
658	3621	CCCCCCCC[C@H](C)CCC	C13H28	41	-77.1016	C -6.674046 -1.040166 -0.133677 H -6.833326 -1.139018 0.947300 H -6.448846 -2.039615 -0.526049 H -7.619651 -0.711999 -0.580423 C -5.539129 -0.055927 -0.438108 H -5.423576 0.042437 -1.527276 C -4.199008 -0.487523 0.174252 H -3.983778 -1.514872 -0.155129 C -2.988148 0.402033 -0.178354 H -2.934776 0.467412 -1.277499 C -1.684114 -0.263923 0.309853 H -1.678406 -1.308916 -0.033548 H -1.695098 -0.308524…	0	0	0	0	0	3	0	0	0	0	0	0	0	9	0	1	0	2	0
659	3622	CCCCCCC[C@@H](C)CCCC	C13H28	41	-77.1004	C 6.862354 -0.517819 -0.443213 H 7.157190 0.484068 -0.107201 H 6.829944 -0.501361 -1.539708 H 7.653472 -1.215074 -0.144220 C 5.506670 -0.922614 0.144679 H 5.256959 -1.943060 -0.179297 C 4.367142 0.026639 -0.250519 H 4.288528 0.058538 -1.347924 C 3.011088 -0.380225 0.343115 H 2.816454 -1.429271 0.075432 C 1.804540 0.469532 -0.109037 H 1.786990 0.458856 -1.211184 C 0.491141 -0.176105 0.381389 H 0.4…	0	0	0	0	0	3	0	0	0	0	0	0	0	9	0	1	0	2	0
660	3623	CCCCCC[C@H](C)CCCCC	C13H28	41	-77.1336	C -6.913251 -0.918755 -0.044764 H -7.041953 -0.930122 1.044684 H -6.781664 -1.957645 -0.371838 H -7.845018 -0.546553 -0.485999 C -5.715496 -0.054319 -0.451715 H -5.634006 -0.034516 -1.547931 C -4.387832 -0.539433 0.144543 H -4.212353 -1.581426 -0.162493 C -3.182120 0.319461 -0.260419 H -3.096441 0.327854 -1.357625 C -1.860734 -0.173785 0.346209 H -1.740628 -1.238239 0.096271 C -0.595003 0.580273 …	0	0	0	0	0	3	0	0	0	0	0	0	0	9	0	1	0	2	0
661	3624	CCCCCCCCC(CC)CC	C13H28	41	-75.9124	C -4.445916 -2.222125 0.580565 H -4.532267 -2.005880 1.652706 H -3.531950 -2.809007 0.435108 H -5.291840 -2.861228 0.302085 C -4.441933 -0.927625 -0.241595 H -4.404704 -1.170647 -1.314044 C -3.284922 0.043296 0.085250 H -3.200919 0.106335 1.183136 C -1.940107 -0.486210 -0.461943 H -1.887348 -1.573349 -0.315451 C -0.688905 0.138859 0.172214 H -0.707827 -0.043374 1.257113 C 0.621687 -0.408676 -0.40…	0	0	0	0	0	3	0	0	0	0	0	0	0	9	0	1	0	3	0
662	3625	CCCCCCC[C@H](CC)CCC	C13H28	41	-75.8681	C -4.354844 -2.890694 0.076983 H -4.717807 -2.833029 1.110663 H -3.514803 -3.596257 0.061847 H -5.158502 -3.316883 -0.534536 C -3.929693 -1.511416 -0.438368 H -3.607645 -1.596260 -1.486116 C -2.791622 -0.890900 0.384891 H -1.939748 -1.583934 0.361030 C -2.332428 0.508568 -0.083221 H -2.270521 0.492121 -1.184152 C -0.926664 0.846549 0.462926 H -0.906809 0.630737 1.542447 C 0.231649 0.112112 -0.227…	0	0	0	0	0	3	0	0	0	0	0	0	0	9	0	1	0	3	0
663	3626	CCCCCC[C@@H](CC)CCCC	C13H28	41	-76.4258	C 6.170680 -0.832380 -0.327470 H 6.450052 0.228021 -0.360961 H 6.139987 -1.197821 -1.361457 H 6.971520 -1.371026 0.192100 C 4.820066 -1.027736 0.368964 H 4.586148 -2.100686 0.420332 C 3.666972 -0.291819 -0.327214 H 3.588196 -0.645737 -1.366483 C 2.317411 -0.482502 0.379075 H 2.145311 -1.560412 0.514470 C 1.092236 0.106170 -0.354705 H 1.057521 -0.367553 -1.349578 C -0.203392 -0.301600 0.380893 H -…	0	0	0	0	0	3	0	0	0	0	0	0	0	9	0	1	0	3	0
664	3627	CCCCCC(CC)CCCCC	C13H28	41	-75.8717	C -5.581912 -2.107889 0.095950 H -5.835663 -1.885816 1.139925 H -5.133668 -3.108923 0.071601 H -6.518146 -2.148688 -0.472566 C -4.623649 -1.058180 -0.476161 H -4.416647 -1.287895 -1.531179 C -3.297769 -0.966499 0.290166 H -2.808087 -1.951977 0.285140 C -2.332337 0.083447 -0.275774 H -2.128609 -0.144640 -1.332705 C -1.000948 0.155515 0.485989 H -0.535051 -0.838455 0.450661 C -0.002758 1.211785 -0.…	0	0	0	0	0	3	0	0	0	0	0	0	0	9	0	1	0	3	0
665	3628	CCCCCCCCCC(C)(C)C	C13H28	41	-79.8045	C 5.471231 1.098825 -0.000009 H 5.379500 1.739412 0.886018 H 5.379507 1.739388 -0.886054 H 6.481461 0.671098 0.000000 C 4.399317 -0.009575 0.000002 C 3.005963 0.674431 -0.000008 H 2.950637 1.336079 -0.877745 C 1.770474 -0.238095 -0.000004 H 1.788101 -0.897375 -0.878552 C 0.453580 0.551665 -0.000005 H 0.426890 1.213786 -0.878340 C -0.795213 -0.339553 -0.000004 H -0.768761 -1.001572 -0.878436 C -2.…	0	0	0	0	0	4	0	0	0	0	0	0	0	8	0	0	1	2	0
666	3629	CCCCCCCC[C@@H](C)C(C)C	C13H28	41	-76.8417	C 5.758224 0.198322 -0.151469 H 5.924454 1.154456 0.353470 H 5.810240 0.376042 -1.234132 H 6.592881 -0.461651 0.112871 C 4.417406 -0.448960 0.238066 C 3.184924 0.397224 -0.197192 H 3.104654 0.308185 -1.293546 C 1.874053 -0.145985 0.418669 H 1.859174 -1.240766 0.356659 C 0.582712 0.374739 -0.230650 H 0.604549 0.148218 -1.307225 C -0.686392 -0.229494 0.386012 H -0.645066 -1.325828 0.302503 C -1.982…	0	0	0	0	0	4	0	0	0	0	0	0	0	7	0	2	0	3	0
667	3630	CCCCCCC[C@H](C)CC(C)C	C13H28	41	-78.4206	C 5.636909 -1.133577 -0.368048 H 5.579664 -1.352505 -1.441131 H 5.481244 -2.076761 0.172230 H 6.655150 -0.790291 -0.149143 C 4.593588 -0.084088 0.046463 C 3.178288 -0.570507 -0.328841 H 2.987357 -1.510070 0.212508 C 2.000275 0.392275 -0.064206 H 1.981178 0.626671 1.010897 C 0.669794 -0.316664 -0.398190 H 0.671858 -1.304886 0.084924 C -0.602022 0.428511 0.031385 H -0.538350 0.665156 1.104272 C -1.…	0	0	0	0	0	4	0	0	0	0	0	0	0	7	0	2	0	3	0
668	3631	CCCCCC[C@@H](C)CCC(C)C	C13H28	41	-78.2441	C 4.941087 -1.143303 0.981851 H 4.124738 -1.723437 1.425121 H 5.193029 -0.333292 1.679553 H 5.814543 -1.802552 0.911128 C 4.566542 -0.578233 -0.396994 C 3.351261 0.369698 -0.336486 H 3.197184 0.799808 -1.337588 C 2.040917 -0.290345 0.119704 H 1.898238 -1.215811 -0.458081 C 0.778097 0.582784 -0.043021 H 0.726194 0.895769 -1.098733 C -0.483997 -0.253992 0.255043 H -0.418819 -1.194591 -0.311591 C -1…	0	0	0	0	0	4	0	0	0	0	0	0	0	7	0	2	0	3	0
669	3632	CCCCC[C@H](C)CCCC(C)C	C13H28	41	-78.2689	C 5.871333 -0.931982 -0.557717 H 5.770697 -1.053923 -1.642916 H 5.825351 -1.931418 -0.105238 H 6.868838 -0.523243 -0.356581 C 4.770462 -0.022579 0.008826 C 3.376141 -0.584589 -0.333712 H 3.249461 -1.555687 0.169875 C 2.193433 0.329589 0.018770 H 2.154325 0.492162 1.104764 C 0.846009 -0.242669 -0.446221 H 0.748646 -1.264579 -0.050955 C -0.400291 0.563599 -0.023422 H -0.364210 0.677986 1.072396 C -…	0	0	0	0	0	4	0	0	0	0	0	0	0	7	0	2	0	3	0
670	3633	CCCC[C@@H](C)CCCCC(C)C	C13H28	41	-78.1622	C -6.065768 0.579212 0.254716 H -5.998331 1.632461 -0.043242 H -6.130615 0.547214 1.350393 H -7.004538 0.176599 -0.144226 C -4.855924 -0.223910 -0.246469 C -3.543546 0.391665 0.279276 H -3.522340 0.301808 1.376657 C -2.256002 -0.206574 -0.304487 H -2.184982 -1.272336 -0.048121 C -0.985692 0.507144 0.180034 H -0.940501 0.458762 1.278610 C 0.301056 -0.091733 -0.405560 H 0.305028 -1.172468 -0.200687…	0	0	0	0	0	4	0	0	0	0	0	0	0	7	0	2	0	3	0
671	3634	CCC[C@H](C)CCCCCC(C)C	C13H28	41	-78.1749	C 6.117289 -0.751684 -0.565568 H 5.979079 -1.066681 -1.606878 H 6.181409 -1.658509 0.050300 H 7.082265 -0.235434 -0.495926 C 4.966115 0.150169 -0.095075 C 3.613656 -0.573223 -0.253689 H 3.595948 -1.446656 0.416785 C 2.371141 0.290622 0.004059 H 2.371052 0.651393 1.041648 C 1.054647 -0.451515 -0.263654 H 1.012558 -1.354042 0.364223 C -0.194217 0.403215 -0.007401 H -0.188083 0.749089 1.037370 C -1.…	0	0	0	0	0	4	0	0	0	0	0	0	0	7	0	2	0	3	0
672	3635	CC[C@@H](C)CCCCCCC(C)C	C13H28	41	-78.1877	C -6.227993 0.887500 0.120364 H -6.068458 1.909371 -0.244313 H -6.322759 0.935578 1.213274 H -7.185798 0.533684 -0.279591 C -5.074535 -0.040633 -0.289494 C -3.730428 0.504520 0.233698 H -3.744333 0.490028 1.334759 C -2.481069 -0.232758 -0.268366 H -2.501316 -1.279287 0.064910 C -1.170247 0.412652 0.201584 H -1.158701 0.451194 1.301145 C 0.084880 -0.318516 -0.292116 H 0.052600 -1.364796 0.046699 C…	0	0	0	0	0	4	0	0	0	0	0	0	0	7	0	2	0	3	0
673	3636	CC(C)CCCCCCCC(C)C	C13H28	41	-78.9726	C 6.339726 -0.726705 -0.500008 H 6.180081 -1.361815 -1.379672 H 6.476799 -1.387230 0.366400 H 7.276744 -0.176653 -0.648285 C 5.159168 0.230829 -0.278021 C 3.843370 -0.559095 -0.129034 H 3.899034 -1.175896 0.781574 C 2.566086 0.291474 -0.089280 H 2.584662 0.959390 0.782648 C 1.282838 -0.549239 -0.043397 H 1.313392 -1.210191 0.835705 C 0.000000 0.291135 0.000000 H 0.029543 0.953676 0.877946 C -1.28…	0	0	0	0	0	4	0	0	0	0	0	0	0	7	0	2	0	2	0
674	3637	CCCCCCCCC(C)(C)CC	C13H28	41	-78.2487	C -5.861655 -0.523196 -0.000118 H -6.115267 0.070895 -0.884910 H -6.115254 0.070411 0.885002 H -6.517565 -1.401518 -0.000354 C -4.392070 -0.963823 -0.000247 C -3.310595 0.153649 -0.000002 C -1.933866 -0.569123 -0.000121 H -1.897836 -1.232600 0.877253 C -0.667265 0.300215 0.000005 H -0.659207 0.959315 0.878596 C 0.619903 -0.537567 -0.000074 H 0.622462 -1.200296 0.878192 C 1.900287 0.307643 0.00003…	0	0	0	0	0	4	0	0	0	0	0	0	0	8	0	0	1	4	0
675	3638	CCCCCCC[C@H](C)[C@H](C)CC	C13H28	41	-76.6127	C -5.074378 -1.890065 -0.403622 H -5.807975 -1.261915 -0.924658 H -5.399527 -1.985115 0.638160 H -5.117091 -2.889790 -0.851128 C -3.662552 -1.300849 -0.516245 C -3.529926 0.148793 0.000438 C -2.190497 0.805820 -0.449349 H -2.097001 0.590567 -1.525908 C -0.947371 0.204642 0.242892 H -1.026488 -0.890929 0.245431 C 0.393731 0.583182 -0.404417 H 0.369470 0.314741 -1.471372 C 1.597082 -0.099081 0.2603…	0	0	0	0	0	4	0	0	0	0	0	0	0	7	0	2	0	4	0
676	3639	CCCCCC[C@@H](C)C[C@H](C)CC	C13H28	41	-77.6653	C -6.034807 -0.452840 -0.172225 H -6.177659 0.400698 -0.846977 H -6.318961 -0.130224 0.835358 H -6.740250 -1.235274 -0.474964 C -4.591642 -0.967457 -0.230279 C -3.507327 0.085758 0.084722 C -2.113766 -0.499708 -0.230778 H -1.961809 -1.382562 0.409269 C -0.892108 0.431657 -0.071242 H -0.851559 0.774317 0.973607 C 0.402226 -0.367638 -0.336416 H 0.359385 -1.300939 0.244206 C 1.709719 0.358104 0.0115…	0	0	0	0	0	4	0	0	0	0	0	0	0	7	0	2	0	4	0
677	3640	CCCCC[C@H](C)CC[C@H](C)CC	C13H28	41	-77.4366	C 5.209263 1.813625 0.391443 H 4.991352 2.495197 -0.440630 H 6.127120 1.269986 0.143071 H 5.421964 2.427670 1.274171 C 4.029576 0.869490 0.655200 C 3.579796 0.035370 -0.562479 C 2.301877 -0.779577 -0.265786 H 2.100753 -1.428957 -1.130886 C 1.042700 0.056099 0.014637 H 0.957967 0.829478 -0.763375 C -0.276160 -0.746106 0.046764 H -0.355739 -1.289778 -0.908881 C -1.478357 0.217714 0.133341 H -1.3559…	0	0	0	0	0	4	0	0	0	0	0	0	0	7	0	2	0	4	0
678	3641	CCCC[C@@H](C)CCC[C@H](C)CC	C13H28	41	-77.4791	C -6.228769 -0.187286 -0.367487 H -6.257048 0.720394 -0.983590 H -6.554547 0.086676 0.641850 H -6.971541 -0.884640 -0.771791 C -4.830255 -0.815836 -0.374020 C -3.688964 0.118857 0.079601 C -2.323386 -0.553702 -0.173304 H -2.238574 -1.444726 0.468129 C -1.094624 0.343227 0.039321 H -1.033973 0.658529 1.089995 C 0.218052 -0.356159 -0.344384 H 0.270512 -1.314107 0.193786 C 1.506778 0.439745 -0.04814…	0	0	0	0	0	4	0	0	0	0	0	0	0	7	0	2	0	4	0
679	3642	CCC[C@H](C)CCCC[C@H](C)CC	C13H28	41	-77.4027	C -6.320223 0.253289 0.341736 H -6.274922 0.283485 1.437774 H -6.645321 -0.751491 0.050774 H -7.101236 0.953512 0.023636 C -4.968065 0.626562 -0.277359 C -3.773892 -0.233704 0.187308 C -2.453128 0.370164 -0.334626 H -2.439203 0.304381 -1.433764 C -1.170372 -0.259500 0.226861 H -1.111430 -1.318557 -0.058032 C 0.105733 0.452770 -0.244727 H 0.144860 0.434199 -1.344450 C 1.388306 -0.176846 0.317298 H…	0	0	0	0	0	4	0	0	0	0	0	0	0	7	0	2	0	4	0
680	3643	CC[C@@H](C)CCCCC[C@H](C)CC	C13H28	41	-77.5544	C -6.415372 -0.106078 -0.550728 H -6.347156 0.525805 -1.445344 H -6.771760 0.522235 0.272758 H -7.184563 -0.863944 -0.739030 C -5.066932 -0.764247 -0.235343 C -3.885991 0.213029 -0.055855 C -2.561006 -0.572025 0.041616 H -2.572776 -1.181588 0.958619 C -1.283763 0.279616 0.016067 H -1.257468 0.949532 0.886054 C 0.000000 -0.561567 -0.000004 H 0.010891 -1.224254 0.878234 C 1.283762 0.279616 -0.01606…	0	0	0	0	0	4	0	0	0	0	0	0	0	7	0	2	0	4	0
681	3644	CCCCCCCC(C)(C)CCC	C13H28	41	-78.1547	C -4.529581 2.498128 -0.195090 H -4.343146 2.752922 -1.245834 H -3.886270 3.140949 0.418591 H -5.570695 2.756538 0.030273 C -4.250631 1.014455 0.073631 C -2.796197 0.631051 -0.242106 C -2.373685 -0.839117 0.024726 C -0.913708 -1.056476 -0.465534 H -0.887220 -0.877379 -1.551132 C 0.196252 -0.222407 0.192387 H 0.008130 0.848871 0.040980 C 1.589419 -0.560872 -0.358045 H 1.598010 -0.403746 -1.447007 …	0	0	0	0	0	4	0	0	0	0	0	0	0	8	0	0	1	4	0
682	3645	CCCCCC[C@@H](C)[C@@H](C)CCC	C13H28	41	-76.5767	C 4.687438 -2.542627 -0.339350 H 4.405746 -2.808182 -1.365874 H 4.134773 -3.207306 0.336243 H 5.755056 -2.760294 -0.219902 C 4.379300 -1.070818 -0.042770 C 2.890154 -0.730431 -0.204752 C 2.538333 0.759852 -0.001164 C 1.120537 1.102715 -0.549839 H 1.076798 0.665968 -1.560420 C -0.025607 0.467732 0.267998 H 0.218015 -0.582057 0.480360 C -1.400993 0.507989 -0.415773 H -1.323719 0.047338 -1.412207 C …	0	0	0	0	0	4	0	0	0	0	0	0	0	7	0	2	0	4	0
683	3646	CCCCC[C@H](C)C[C@@H](C)CCC	C13H28	41	-77.701	C 6.050127 -1.171654 -0.269053 H 5.884046 -1.725257 -1.201528 H 6.039318 -1.899089 0.552135 H 7.055042 -0.736302 -0.314371 C 4.980577 -0.092520 -0.066546 C 3.559630 -0.670141 -0.000397 C 2.423306 0.369501 0.108656 C 1.061855 -0.334268 -0.082412 H 0.950632 -1.084477 0.715684 C -0.205349 0.548411 -0.099012 H -0.268143 1.083197 0.860556 C -1.456995 -0.350499 -0.199111 H -1.371431 -1.150152 0.551357 …	0	0	0	0	0	4	0	0	0	0	0	0	0	7	0	2	0	4	0
684	3647	CCCC[C@@H](C)CC[C@@H](C)CCC	C13H28	41	-77.3973	C 5.583504 -1.716605 -0.587875 H 5.318617 -2.035637 -1.603563 H 5.389208 -2.561886 0.083986 H 6.661600 -1.519477 -0.570953 C 4.781146 -0.479994 -0.167828 C 3.265222 -0.722927 -0.182119 C 2.390865 0.509044 0.133006 C 0.906032 0.186883 -0.141704 H 0.586885 -0.603584 0.552267 C -0.045360 1.390646 -0.052163 H -0.110502 1.748039 0.985341 C -1.476662 1.138552 -0.575626 H -1.388974 0.736200 -1.598114 C …	0	0	0	0	0	4	0	0	0	0	0	0	0	7	0	2	0	4	0
685	3648	CCC[C@H](C)CCC[C@@H](C)CCC	C13H28	41	-77.3906	C -6.279026 -0.977569 0.436290 H -6.075137 -1.626422 1.297100 H -6.378858 -1.622341 -0.445722 H -7.247819 -0.493658 0.605737 C -5.162966 0.055200 0.243307 C -3.791015 -0.591173 0.004351 C -2.602139 0.387649 -0.097605 C -1.272794 -0.396423 -0.106858 H -1.224378 -1.008681 -1.020800 C 0.000000 0.456920 0.000031 H 0.087949 1.116222 -0.874367 C 1.272794 -0.396438 0.106801 H 1.284165 -1.108205 -0.73180…	0	0	0	0	0	4	0	0	0	0	0	0	0	7	0	2	0	4	0
686	3649	CCCCCCC(C)(C)CCCC	C13H28	41	-78.9042	C 3.367011 3.352682 -0.318872 H 2.430082 3.738501 -0.739548 H 4.030783 3.112080 -1.158587 H 3.833796 4.163419 0.252308 C 3.115145 2.121983 0.558213 C 2.461604 0.959376 -0.202631 C 2.210876 -0.264814 0.690315 C 1.582175 -1.517727 0.021691 C 0.223473 -1.203731 -0.662026 H 0.403402 -0.533907 -1.514774 C -0.880867 -0.592210 0.213080 H -0.542328 0.365073 0.633071 C -2.186554 -0.359466 -0.560764 H -1.9…	0	0	0	0	0	4	0	0	0	0	0	0	0	8	0	0	1	4	0
687	3650	CCCCC[C@H](C)[C@H](C)CCCC	C13H28	41	-76.4966	C 4.022644 -2.955123 0.578218 H 3.161667 -3.435020 1.059914 H 4.646608 -2.525040 1.371500 H 4.607049 -3.739620 0.083805 C 3.572971 -1.880078 -0.416449 C 2.752340 -0.757675 0.233944 C 2.296923 0.311775 -0.769085 C 1.612826 1.557802 -0.162425 C 0.313040 1.243327 0.637282 H 0.563157 0.428031 1.331538 C -0.848386 0.744446 -0.250023 H -0.469880 -0.001571 -0.962271 C -2.018587 0.114127 0.520964 H -1.63…	0	0	0	0	0	4	0	0	0	0	0	0	0	7	0	2	0	4	0
688	3651	CCCC[C@@H](C)C[C@H](C)CCCC	C13H28	41	-77.6035	C 6.421102 -0.276648 0.238368 H 6.485562 0.359921 1.129573 H 6.642144 0.352596 -0.632726 H 7.211397 -1.032616 0.311666 C 5.036963 -0.922463 0.118253 C 3.897784 0.100958 0.014718 C 2.512813 -0.549880 -0.108063 C 1.316842 0.426971 -0.110967 C 0.000000 -0.372322 -0.000001 H -0.070796 -1.036353 -0.875323 C -1.316842 0.426971 0.110967 H -1.415109 1.059889 -0.783710 C -2.512813 -0.549880 0.108062 H -2.…	0	0	0	0	0	4	0	0	0	0	0	0	0	7	0	2	0	4	0
689	3652	CCCCCC(C)(C)CCCCC	C13H28	41	-78.8123	C 4.780957 -2.465930 -0.215639 H 5.554345 -1.780497 -0.583896 H 4.394415 -3.021128 -1.079312 H 5.265922 -3.186389 0.453049 C 3.660444 -1.703564 0.499052 C 2.953177 -0.682308 -0.401136 C 1.829045 0.087130 0.307107 C 1.134281 1.099498 -0.615715 C 0.000000 1.963542 0.000000 C -1.134283 1.099500 0.615715 H -1.895554 1.784676 1.018082 C -1.829047 0.087132 -0.307107 H -2.247750 0.599363 -1.184034 C -2.…	0	0	0	0	0	4	0	0	0	0	0	0	0	8	0	0	1	4	0
690	3653	CCCCCCC(CCC)CCC	C13H28	41	-75.8217	C -3.841626 -3.183987 -0.054703 H -4.811425 -2.689142 -0.190062 H -3.756817 -3.458121 1.004170 H -3.857004 -4.111670 -0.638340 C -2.688437 -2.270583 -0.484339 C -2.646612 -0.951427 0.300371 C -1.490474 0.000534 -0.081991 C -0.142865 -0.504619 0.482245 C 1.104764 0.080748 -0.194992 C 2.418637 -0.435830 0.406752 H 2.438061 -1.534416 0.347826 C 3.670731 0.129247 -0.276091 H 3.642287 -0.115917 -1.348…	0	0	0	0	0	3	0	0	0	0	0	0	0	9	0	1	0	3	0
691	3654	CCCCC[C@@H](CCC)CCCC	C13H28	41	-76.0141	C -5.198010 -1.829245 -0.327386 H -5.532206 -1.007362 -0.972714 H -5.573779 -1.628149 0.683534 H -5.677596 -2.748111 -0.683897 C -3.671002 -1.954254 -0.335782 C -2.956922 -0.688658 0.157949 C -1.426538 -0.818259 0.153859 C -0.662697 0.405524 0.710021 C 0.792447 0.037504 1.088993 C 1.715338 -0.375902 -0.067738 H 1.793638 0.442886 -0.796743 C 3.125433 -0.756863 0.404006 H 3.568342 0.090379 0.949071…	0	0	0	0	0	3	0	0	0	0	0	0	0	9	0	1	0	3	0
692	3655	CCCCCC[C@@H](CCC)C(C)C	C13H28	41	-76.1914	C 4.071471 2.773916 0.076211 H 5.013028 2.245904 -0.119817 H 4.006138 2.939700 1.158709 H 4.133575 3.755553 -0.407571 C 2.869562 1.972326 -0.434839 C 2.760820 0.581310 0.207760 C 1.540490 -0.245430 -0.261876 C 0.241058 0.255301 0.411570 C -1.061149 -0.159338 -0.289297 C -2.317833 0.394239 0.396222 H -2.251541 1.491494 0.444814 C -3.624193 -0.002949 -0.303037 H -3.598125 0.344127 -1.346934 C -4.88…	0	0	0	0	0	4	0	0	0	0	0	0	0	7	0	2	0	4	0
693	3656	CCCCC[C@H](CCCC)C(C)C	C13H28	41	-76.1848	C 4.590094 -2.555395 -0.310212 H 5.325388 -1.743674 -0.374121 H 4.368026 -2.880193 -1.334311 H 5.065992 -3.395074 0.209284 C 3.319657 -2.096254 0.412764 C 2.618668 -0.920578 -0.281355 C 1.340014 -0.468849 0.439308 C 0.570898 0.687118 -0.242484 C -0.887953 0.757086 0.268386 C -1.817102 -0.314243 -0.322190 H -1.410151 -1.317074 -0.130532 C -3.248466 -0.245491 0.226129 H -3.225194 -0.364116 1.319838…	0	0	0	0	0	4	0	0	0	0	0	0	0	7	0	2	0	4	0
694	3657	CCCCCCC[C@@H](CC)C(C)C	C13H28	41	-76.2532	C 3.784130 -1.356670 1.255540 H 2.949703 -2.012302 1.531344 H 3.875158 -0.588598 2.031824 H 4.698238 -1.961584 1.284174 C 3.586816 -0.748233 -0.143391 C 2.385946 0.239881 -0.232868 C 1.061278 -0.374204 0.278999 C -0.204621 0.285400 -0.289008 C -1.502640 -0.321605 0.260086 C -2.771708 0.319576 -0.316366 H -2.762192 0.221706 -1.412243 C -4.069661 -0.284990 0.234191 H -4.084150 -1.365613 0.027068 C …	0	0	0	0	0	4	0	0	0	0	0	0	0	7	0	2	0	4	0
695	3658	CCCCCCCC(C)(CC)CC	C13H28	41	-77.238	C -3.884399 -2.056600 -0.730564 H -4.060535 -2.548159 0.232308 H -2.987385 -2.502305 -1.174170 H -4.728077 -2.308639 -1.383600 C -3.766079 -0.532411 -0.589176 C -2.615265 0.011478 0.305273 C -1.247714 -0.383742 -0.316970 C 0.017470 0.156301 0.368557 C 1.307040 -0.340841 -0.300600 C 2.585351 0.192123 0.359427 H 2.593432 -0.096782 1.421092 C 3.873946 -0.303395 -0.309434 H 3.891443 -1.403551 -0.2951…	0	0	0	0	0	4	0	0	0	0	0	0	0	8	0	0	1	6	0
696	3659	CCCCCC[C@H](C)C(CC)CC	C13H28	41	-75.408	C -4.414158 -1.510806 -1.028719 H -4.866965 -0.698626 -1.608732 H -5.002023 -1.627194 -0.109729 H -4.526395 -2.431169 -1.613560 C -2.938697 -1.241273 -0.706340 C -2.695208 0.043719 0.120305 C -1.331857 0.026785 0.878261 C -0.130328 -0.299241 -0.037279 C 1.242070 0.047865 0.559832 C 2.406243 -0.236639 -0.398878 H 2.255183 0.327509 -1.331429 C 3.781544 0.110791 0.185225 H 3.797824 1.173494 0.470334…	0	0	0	0	0	4	0	0	0	0	0	0	0	7	0	2	0	5	0
697	3660	CCCCC[C@H](C)CC(CC)CC	C13H28	41	-76.0554	C 4.001640 1.993664 -0.535759 H 3.097397 2.600628 -0.657386 H 4.250526 1.569529 -1.515337 H 4.816792 2.671575 -0.257489 C 3.819610 0.905567 0.531119 C 2.676826 -0.107696 0.277633 C 1.297485 0.593090 0.278425 C 0.065078 -0.306509 0.529928 C -1.224138 0.453401 0.150929 C -2.519569 -0.368317 0.212703 H -2.709927 -0.698603 1.242727 C -3.745621 0.402895 -0.294669 H -3.863882 1.325408 0.293499 C -5.048…	0	0	0	0	0	4	0	0	0	0	0	0	0	7	0	2	0	5	0
698	3661	CCCC[C@H](C)CCC(CC)CC	C13H28	41	-76.0869	C 3.913294 2.518806 0.228202 H 4.928620 2.106825 0.208821 H 3.627989 2.644191 1.280124 H 3.957079 3.516099 -0.224689 C 2.910080 1.623840 -0.509384 C 2.779493 0.192729 0.059282 C 1.473105 -0.481233 -0.422313 C 0.206871 0.007328 0.298249 C -1.125735 -0.516551 -0.279202 C -2.312307 0.189913 0.410349 H -2.125436 1.273921 0.398557 C -3.690898 -0.069359 -0.213430 H -3.654380 0.168710 -1.287422 C -4.812…	0	0	0	0	0	4	0	0	0	0	0	0	0	7	0	2	0	5	0
699	3662	CCC[C@@H](C)CCCC(CC)CC	C13H28	41	-76.0975	C 4.269467 2.220025 0.227018 H 5.236435 1.714449 0.125983 H 4.047274 2.296493 1.298701 H 4.391956 3.238437 -0.159555 C 3.147760 1.482793 -0.514723 C 2.892989 0.036812 -0.032280 C 1.513927 -0.474840 -0.506126 C 0.308253 0.117332 0.239737 C -1.032393 -0.426589 -0.275758 C -2.292423 0.196064 0.362169 H -2.220329 1.289116 0.238347 C -3.553356 -0.273204 -0.393968 H -3.387411 -0.127334 -1.471667 C -4.8…	0	0	0	0	0	4	0	0	0	0	0	0	0	7	0	2	0	5	0
700	3663	CC[C@H](C)CCCCC(CC)CC	C13H28	41	-76.1945	C -4.420840 -2.220905 0.302483 H -5.379174 -1.690979 0.261985 H -4.154183 -2.340588 1.359963 H -4.583768 -3.221863 -0.113624 C -3.315556 -1.481994 -0.461822 C -3.007934 -0.059624 0.058500 C -1.637078 0.437412 -0.453452 C -0.418399 -0.200762 0.229055 C 0.920342 0.313317 -0.319496 C 2.136281 -0.311816 0.379074 H 2.040055 -1.406518 0.329195 C 3.511416 0.083029 -0.199308 H 3.496560 -0.147262 -1.27736…	0	0	0	0	0	4	0	0	0	0	0	0	0	7	0	2	0	5	0
701	3664	CCC(CC)CCCCCC(C)C	C13H28	41	-76.9125	C -4.419149 2.257776 -0.278322 H -5.398520 1.766207 -0.270359 H -4.127138 2.395065 -1.326934 H -4.550115 3.252918 0.162297 C -3.359526 1.454450 0.485694 C -3.097688 0.035652 -0.068322 C -1.758592 -0.529562 0.456767 C -0.501436 0.077089 -0.183484 C 0.803536 -0.503435 0.377951 C 2.064952 0.083541 -0.270109 H 2.054086 1.174788 -0.144430 C 3.364324 -0.499905 0.302376 H 3.422937 -0.272420 1.378269 C 4…	0	0	0	0	0	4	0	0	0	0	0	0	0	7	0	2	0	4	0
702	3665	CCCCCC[C@H](CC)CC(C)C	C13H28	41	-76.8734	C 2.857104 -1.827916 1.428907 H 2.101649 -2.615404 1.305788 H 2.446471 -1.078353 2.114119 H 3.729071 -2.278840 1.917636 C 3.240415 -1.224271 0.068579 C 2.037661 -0.559360 -0.635102 C 1.495384 0.741609 0.001600 C 0.060732 1.040508 -0.490475 C -1.033838 0.158552 0.127569 C -2.438362 0.475522 -0.403471 H -2.451153 0.344942 -1.495888 C -3.540579 -0.388808 0.222132 H -3.316370 -1.450976 0.041995 C -4.…	0	0	0	0	0	4	0	0	0	0	0	0	0	7	0	2	0	4	0
703	3666	CCCCCC[C@H](CC)[C@H](C)CC	C13H28	41	-75.5115	C -4.179497 -2.233242 -0.718509 H -4.994347 -1.556483 -1.005680 H -4.411923 -2.629065 0.276103 H -4.189850 -3.078332 -1.416562 C -2.824955 -1.514357 -0.752450 C -2.751447 -0.235570 0.111318 C -1.447526 0.570723 -0.171858 C -0.186370 -0.089230 0.435807 C 1.130528 0.307164 -0.249037 C 2.364737 -0.343893 0.389556 H 2.247092 -1.437842 0.375026 C 3.682831 0.032099 -0.299396 H 3.632532 -0.252419 -1.361…	0	0	0	0	0	4	0	0	0	0	0	0	0	7	0	2	0	5	0
704	3667	CCCCCC[C@](C)(CC)CCC	C13H28	41	-77.6101	C 5.149701 -0.923553 -0.960647 H 5.045822 -0.513434 -1.972944 H 5.031095 -2.011791 -1.032830 H 6.172808 -0.721541 -0.623121 C 4.115082 -0.314989 -0.006108 C 2.674176 -0.580247 -0.468287 C 1.516693 -0.063478 0.434027 C 0.192847 -0.416772 -0.303805 C -1.126865 0.032168 0.342074 C -2.356989 -0.429142 -0.453277 H -2.344140 -1.526043 -0.537976 C -3.688740 0.014898 0.165196 H -3.756920 -0.366829 1.1950…	0	0	0	0	0	4	0	0	0	0	0	0	0	8	0	0	1	6	0
705	3668	CCCCC[C@H](C)[C@H](CC)CCC	C13H28	41	-75.5233	C 3.843486 2.882428 0.010619 H 4.398390 2.669274 0.932693 H 3.045047 3.591266 0.263176 H 4.528722 3.385743 -0.681219 C 3.272075 1.598896 -0.601304 C 2.291185 0.875702 0.334213 C 1.708009 -0.437381 -0.240404 C 0.347745 -0.834328 0.410585 C -0.802023 0.069414 -0.087636 C -2.212705 -0.398779 0.299771 H -2.327964 -0.388564 1.392019 C -3.323006 0.458222 -0.323237 H -3.184683 1.507642 -0.022250 C -4.73…	0	0	0	0	0	4	0	0	0	0	0	0	0	7	0	2	0	5	0
706	3669	CCCC[C@H](C)C[C@H](CC)CCC	C13H28	41	-76.8728	C 5.013957 -1.452471 -0.743857 H 5.583809 -0.514936 -0.746549 H 4.840505 -1.735194 -1.789559 H 5.646245 -2.224388 -0.290185 C 3.691259 -1.294089 0.014402 C 2.784410 -0.215012 -0.593885 C 1.376289 -0.097895 0.031574 C 0.534670 0.903755 -0.792340 C -0.938676 1.121908 -0.380952 C -1.762590 -0.179625 -0.465361 H -1.259361 -0.962174 0.118292 C -3.211550 -0.073821 0.032799 H -3.216790 0.347131 1.049903…	0	0	0	0	0	4	0	0	0	0	0	0	0	7	0	2	0	5	0
707	3670	CCC[C@H](C)CC[C@H](CC)CCC	C13H28	41	-75.8659	C 4.285133 -2.519896 -0.047939 H 5.203119 -1.987210 -0.325899 H 3.916797 -3.031683 -0.945698 H 4.555347 -3.288154 0.685705 C 3.232689 -1.556380 0.511313 C 2.842356 -0.454240 -0.484069 C 1.771830 0.537266 0.024934 C 0.368208 -0.111716 0.028562 C -0.661901 0.597810 0.921689 C -2.050249 -0.076650 0.990930 C -2.807808 0.022976 -0.349721 H -3.029908 1.082403 -0.553437 C -4.107469 -0.791347 -0.431336 H…	0	0	0	0	0	4	0	0	0	0	0	0	0	7	0	2	0	5	0
708	3671	CCC[C@@H](CC)CCC[C@@H](C)CC	C13H28	41	-76.1477	C 4.056726 -2.892701 -0.019323 H 4.428043 -2.865625 -1.051286 H 3.214706 -3.595479 0.009311 H 4.854364 -3.303125 0.610585 C 3.631208 -1.498163 0.452843 C 2.501280 -0.898778 -0.396927 C 2.041214 0.514145 0.027896 C 0.641761 0.840595 -0.540893 C -0.525475 0.123663 0.154711 C -1.888716 0.477578 -0.457687 C -3.098550 -0.277333 0.132119 H -2.884727 -1.356384 0.058216 C -4.358901 0.002075 -0.713749 H -…	0	0	0	0	0	4	0	0	0	0	0	0	0	7	0	2	0	5	0
709	3672	CCC[C@@H](CC)CCCCC(C)C	C13H28	41	-77.3923	C -5.604752 -1.464235 0.133594 H -5.761084 -1.232452 1.194525 H -5.325220 -2.522902 0.065738 H -6.565635 -1.339574 -0.378877 C -4.523379 -0.565022 -0.475981 C -3.165139 -0.712354 0.224228 C -1.992725 0.054369 -0.426258 C -0.669389 -0.318327 0.278002 C 0.604675 0.247254 -0.365304 C 1.891847 -0.280441 0.284810 C 3.166872 0.289756 -0.352087 H 3.202115 0.004627 -1.415207 C 4.488092 -0.132286 0.321670…	0	0	0	0	0	4	0	0	0	0	0	0	0	7	0	2	0	4	0
710	3673	CCCCC[C@H](CC)CCC(C)C	C13H28	41	-76.8276	C -3.866236 -1.377414 1.355921 H -4.498263 -0.488444 1.484626 H -3.064404 -1.326966 2.100185 H -4.479352 -2.255827 1.590464 C -3.321442 -1.455537 -0.078685 C -2.463887 -0.229445 -0.454188 C -1.164769 -0.075096 0.351716 C -0.259967 1.095051 -0.098506 C 1.182429 0.918173 0.428029 C 2.011671 -0.152988 -0.295286 C 3.431500 -0.301546 0.267502 H 3.946658 0.669584 0.217620 C 4.273683 -1.357092 -0.460646…	0	0	0	0	0	4	0	0	0	0	0	0	0	7	0	2	0	4	0
711	3674	CCCCC[C@H](CC)C[C@H](C)CC	C13H28	41	-75.554	C -4.133820 -1.321056 -1.381505 H -4.567854 -0.320269 -1.500516 H -4.790420 -1.889215 -0.713432 H -4.161039 -1.811897 -2.361237 C -2.697988 -1.239572 -0.849257 C -2.547715 -0.507016 0.501246 C -1.062552 -0.229564 0.828810 C -0.387765 0.908640 0.027120 C 1.151242 0.766369 0.045826 C 1.703433 -0.344418 -0.861387 C 3.238336 -0.445713 -0.882753 H 3.533270 -1.146744 -1.676916 C 3.874125 -0.907952 0.43…	0	0	0	0	0	4	0	0	0	0	0	0	0	7	0	2	0	5	0
712	3675	CCCCC[C@H](CC)[C@H](C)CCC	C13H28	41	-74.7658	C 4.246893 -2.311666 -0.979104 H 4.801696 -1.605473 -1.609295 H 3.523567 -2.828605 -1.621950 H 4.959165 -3.059108 -0.610994 C 3.545145 -1.589482 0.176257 C 2.535451 -0.536539 -0.304975 C 1.752924 0.172286 0.822012 C 0.498105 0.938139 0.303105 C -0.595789 -0.039842 -0.214338 C -1.995478 0.209641 0.369492 C -3.059460 -0.758696 -0.162398 H -3.115240 -0.672174 -1.258086 C -4.454208 -0.526905 0.433318…	0	0	0	0	0	4	0	0	0	0	0	0	0	7	0	2	0	5	0
713	3676	CCCCC[C@](C)(CC)CCCC	C13H28	41	-77.7604	C 3.484011 -3.194657 0.139016 H 2.611870 -3.787750 0.441111 H 4.039686 -2.938487 1.049636 H 4.127147 -3.837168 -0.473356 C 3.060332 -1.935389 -0.623922 C 2.157532 -1.004306 0.198490 C 1.733691 0.247407 -0.584516 C 0.860698 1.301969 0.154836 C -0.430284 0.671158 0.743879 C -1.394878 -0.002767 -0.243393 C -2.634234 -0.589237 0.447403 H -2.316486 -1.316164 1.209991 C -3.612949 -1.267950 -0.519571 C …	0	0	0	0	0	4	0	0	0	0	0	0	0	8	0	0	1	6	0
714	3677	CCCC[C@H](C)[C@H](CC)CCCC	C13H28	41	-75.5287	C -4.852007 -2.152341 -0.440094 H -4.535235 -2.593792 -1.393168 H -5.510350 -1.305835 -0.671729 H -5.448987 -2.902137 0.091729 C -3.645211 -1.704169 0.390736 C -2.780174 -0.652268 -0.316427 C -1.559214 -0.216563 0.507648 C -0.680884 0.861712 -0.171432 C 0.786501 0.870709 0.355954 C 1.588245 -0.334693 -0.183617 C 3.101666 -0.276596 0.071181 H 3.497224 0.680812 -0.301063 C 3.868463 -1.429132 -0.591…	0	0	0	0	0	4	0	0	0	0	0	0	0	7	0	2	0	5	0
715	3678	CCCC[C@@H](CC)C[C@@H](C)CCC	C13H28	41	-76.1965	C 4.854891 -2.199040 0.411488 H 4.695213 -2.318592 1.490281 H 5.573781 -1.381884 0.273357 H 5.321478 -3.118774 0.040297 C 3.537599 -1.906327 -0.314106 C 2.848601 -0.624987 0.174317 C 1.519620 -0.341095 -0.540158 C 0.795445 0.947900 -0.089010 C -0.695190 0.913065 -0.500529 C -1.618942 0.003678 0.341277 C -2.941864 -0.247937 -0.412716 H -3.461850 0.712495 -0.555199 C -3.901311 -1.247934 0.247799 C …	0	0	0	0	0	4	0	0	0	0	0	0	0	7	0	2	0	5	0
716	3679	CCCC[C@@H](CC)CC[C@@H](C)CC	C13H28	41	-76.1654	C 4.619605 -2.490165 0.450926 H 3.914982 -3.327033 0.368446 H 4.764550 -2.285538 1.518965 H 5.580733 -2.823175 0.042585 C 4.096990 -1.251623 -0.284218 C 2.750652 -0.750055 0.254911 C 2.236079 0.502283 -0.469240 C 0.871133 1.029786 0.027553 C -0.289237 0.134877 -0.468569 C -1.584589 0.267885 0.347183 C -2.806318 -0.480343 -0.227610 H -2.954368 -0.127593 -1.261578 C -4.074460 -0.112332 0.571496 C -…	0	0	0	0	0	4	0	0	0	0	0	0	0	7	0	2	0	5	0
717	3680	CCCC[C@@H](CC)CCCC(C)C	C13H28	41	-76.8819	C 5.010278 -2.255474 0.409188 H 4.748638 -2.534943 1.437303 H 5.735635 -1.434304 0.465386 H 5.514095 -3.113372 -0.050801 C 3.767256 -1.842810 -0.385799 C 3.029725 -0.642671 0.223234 C 1.774211 -0.239242 -0.563177 C 1.007114 0.975075 0.007942 C -0.441023 1.024431 -0.529683 C -1.395816 -0.013732 0.079041 C -2.816647 0.076031 -0.496383 H -3.232770 1.073978 -0.287125 C -3.804429 -0.993109 0.012390 C …	0	0	0	0	0	4	0	0	0	0	0	0	0	7	0	2	0	4	0
718	3681	CCCCCCC[C@H](C)C(C)(C)C	C13H28	41	-78.2415	C -4.811592 0.355951 -0.558903 H -4.682852 0.716412 -1.587648 H -5.065895 1.215424 0.069756 H -5.674341 -0.321224 -0.551031 C -3.548847 -0.379081 -0.059618 C -2.279684 0.525378 -0.260199 C -0.984183 -0.089294 0.325263 C 0.309189 0.430331 -0.321764 C 1.577959 -0.177855 0.290983 C 2.874025 0.321591 -0.360701 C 4.142752 -0.286013 0.251246 H 4.169924 -0.062866 1.328433 C 5.439060 0.212907 -0.400119 C…	0	0	0	0	0	5	0	0	0	0	0	0	0	6	0	1	1	5	0
719	3682	CCCCCC[C@H](C)CC(C)(C)C	C13H28	41	-78.5369	C 4.721490 -0.858369 -0.852857 H 5.037651 -0.033343 -1.503228 H 4.393651 -1.684385 -1.496288 H 5.601804 -1.199764 -0.294142 C 3.595499 -0.414887 0.103054 C 2.377009 0.013184 -0.762409 C 1.137325 0.599391 -0.030717 C -0.163327 0.000114 -0.609323 C -1.458021 0.414466 0.103221 C -2.698874 -0.313298 -0.432196 C -4.000686 0.097304 0.267753 H -3.907392 -0.089726 1.348144 C -5.241241 -0.631303 -0.264958…	0	0	0	0	0	5	0	0	0	0	0	0	0	6	0	1	1	4	1
720	3683	CCCCC[C@@H](C)CCC(C)(C)C	C13H28	41	-79.911	C 4.937194 0.400050 -0.735677 H 5.037468 1.425745 -0.359242 H 4.790730 0.455769 -1.821651 H 5.887172 -0.117299 -0.552905 C 3.765493 -0.333117 -0.051921 C 2.463845 0.454745 -0.365502 C 1.161777 -0.075875 0.255006 C -0.118238 0.652886 -0.212328 C -1.366361 -0.097430 0.299480 C -2.708898 0.388393 -0.265358 C -3.898508 -0.467342 0.190743 H -3.732688 -1.512339 -0.111419 C -5.246938 0.010413 -0.363371 …	0	0	0	0	0	5	0	0	0	0	0	0	0	6	0	1	1	4	0
721	3684	CCCC[C@H](C)CCCC(C)(C)C	C13H28	41	-79.9863	C 4.922586 -1.120376 -0.596856 H 4.888562 -1.024241 -1.689303 H 4.727801 -2.171051 -0.347981 H 5.943459 -0.883786 -0.272225 C 3.895887 -0.187973 0.077139 C 2.484702 -0.585030 -0.433029 C 1.286841 0.208051 0.112400 C -0.045649 -0.278274 -0.478746 C -1.311799 0.387990 0.100257 C -2.572247 -0.340121 -0.413157 C -3.893496 0.077831 0.247479 H -3.797589 -0.011793 1.340303 C -5.092343 -0.757544 -0.22231…	0	0	0	0	0	5	0	0	0	0	0	0	0	6	0	1	1	4	0
722	3685	CCC[C@@H](C)CCCCC(C)(C)C	C13H28	41	-79.9387	C 5.101295 0.690940 -0.690488 H 5.067211 1.732119 -0.346082 H 4.990552 0.696595 -1.782063 H 6.097374 0.294466 -0.457750 C 3.997751 -0.153807 -0.022444 C 2.626814 0.469507 -0.398417 C 1.365595 -0.207889 0.157948 C 0.074374 0.499716 -0.280436 C -1.193434 -0.167336 0.271774 C -2.528138 0.432202 -0.219772 C -3.704414 -0.461992 0.225893 H -3.470935 -1.503195 -0.041765 C -5.072047 -0.105480 -0.373819 C…	0	0	0	0	0	5	0	0	0	0	0	0	0	6	0	1	1	4	0
723	3686	CC[C@H](C)CCCCCC(C)(C)C	C13H28	41	-80.0167	C 4.290243 1.426536 -0.488764 H 3.569819 2.122004 -0.043964 H 4.162682 1.461877 -1.578156 H 5.294646 1.803339 -0.259293 C 4.111359 -0.008062 0.045776 C 2.732708 -0.587392 -0.370240 C 1.478252 0.146584 0.126580 C 0.178754 -0.518565 -0.349596 C -1.089480 0.196780 0.135921 C -2.381927 -0.474883 -0.349668 C -3.692130 0.131929 0.194880 H -3.623676 0.136149 1.295233 C -4.888778 -0.763750 -0.189573 C -6…	0	0	0	0	0	5	0	0	0	0	0	0	0	6	0	1	1	4	0
724	3687	CC(C)CCCCCCC(C)(C)C	C13H28	41	-80.7949	C 4.388666 -0.124183 1.546931 H 3.696371 -0.857093 1.976012 H 4.215037 0.836049 2.049048 H 5.406447 -0.449797 1.795073 C 4.215442 0.006845 0.020948 C 2.813079 0.571081 -0.331743 C 1.590490 -0.250251 0.103962 C 0.263279 0.408210 -0.299631 C -0.973121 -0.395027 0.124426 C -2.299875 0.263311 -0.278057 C -3.530624 -0.546727 0.152752 H -3.429591 -1.570185 -0.237774 C -4.888814 0.019172 -0.308576 C -6.…	0	0	0	0	0	5	0	0	0	0	0	0	0	6	0	1	1	3	0
725	3688	CCCCCCCC(C)(C)C(C)C	C13H28	41	-77.447	C 3.856357 -1.303326 -1.253301 H 3.861534 -0.722890 -2.180815 H 3.040021 -2.032486 -1.316763 H 4.793291 -1.871942 -1.219599 C 3.737236 -0.415964 0.000005 C 2.493581 0.548629 -0.000026 C 1.165742 -0.257545 -0.000015 C -0.141466 0.552648 0.000004 C -1.387484 -0.344728 -0.000012 C -2.706699 0.438527 0.000015 C -3.952322 -0.456916 -0.000005 H -3.924347 -1.119013 -0.878479 C -5.271916 0.325574 0.00002…	0	0	0	0	0	5	0	0	0	0	0	0	0	6	0	1	1	6	0
726	3689	CCCCCC[C@H](C)[C@H](C)C(C)C	C13H28	41	-76.1117	C 4.952948 -0.564891 -0.715467 H 4.738130 -0.893754 -1.739770 H 5.169664 -1.456755 -0.116229 H 5.870275 0.035457 -0.744294 C 3.789852 0.258698 -0.135187 C 2.419708 -0.468404 -0.287234 C 1.183063 0.431457 0.032225 C -0.129512 -0.219547 -0.470563 C -1.416316 0.349079 0.146971 C -2.686278 -0.344720 -0.364699 C -3.977825 0.206547 0.252847 H -3.927482 0.110312 1.347868 C -5.247586 -0.487565 -0.256641 …	0	0	0	0	0	5	0	0	0	0	0	0	0	5	0	3	0	5	0
727	3690	CCCCC[C@H](C)C[C@H](C)C(C)C	C13H28	41	-78.0975	C -4.478505 0.721452 1.109695 H -4.558066 -0.128376 1.798901 H -5.296261 0.640314 0.383900 H -4.648139 1.637086 1.688813 C -3.102981 0.759955 0.422428 C -2.739763 -0.604848 -0.229844 C -1.277626 -0.686990 -0.726411 C -0.149778 -0.411159 0.292168 C 1.216369 -0.478941 -0.424736 C 2.419364 0.003780 0.398107 C 3.730442 0.009485 -0.399744 H 3.928592 -1.003586 -0.780950 C 4.941165 0.488773 0.411394 C 6…	0	0	0	0	0	5	0	0	0	0	0	0	0	5	0	3	0	5	0
728	3691	CCCC[C@H](C)CC[C@H](C)C(C)C	C13H28	41	-77.5864	C -4.960494 -0.344536 -0.633526 H -5.111856 0.637365 -1.098473 H -5.394943 -0.308382 0.372696 H -5.536826 -1.078796 -1.209074 C -3.471460 -0.726087 -0.601181 C -2.594364 0.385775 0.044425 C -1.093042 0.162549 -0.243988 C -0.199137 1.374009 0.067974 C 1.259109 1.262947 -0.429556 C 2.030779 0.135944 0.288366 C 3.440397 -0.143206 -0.253476 H 3.384347 -0.318903 -1.338627 C 4.114819 -1.348123 0.416563…	0	0	0	0	0	5	0	0	0	0	0	0	0	5	0	3	0	5	0
729	3692	CCC[C@@H](C)CCC[C@H](C)C(C)C	C13H28	41	-77.6845	C 5.246993 -0.565653 -0.560500 H 5.047654 -1.564126 -0.968675 H 5.643051 -0.692347 0.454198 H 6.041706 -0.110963 -1.164025 C 3.983168 0.309590 -0.577149 C 2.773222 -0.390588 0.106976 C 1.446164 0.333083 -0.210109 C 0.176619 -0.469434 0.115200 C -1.106885 0.259872 -0.309072 C -2.427592 -0.433697 0.086886 C -3.621305 0.501917 -0.198610 H -3.401751 1.488583 0.235605 C -4.978201 0.028570 0.341720 C -…	0	0	0	0	0	5	0	0	0	0	0	0	0	5	0	3	0	5	0
730	3693	CC[C@H](C)CCCC[C@H](C)C(C)C	C13H28	41	-77.7297	C -5.323524 -0.069630 -0.945887 H -5.085947 0.207312 -1.980374 H -5.748806 0.812742 -0.452897 H -6.109612 -0.833602 -0.977094 C -4.082434 -0.596310 -0.207115 C -2.876387 0.382026 -0.310056 C -1.560196 -0.291967 0.136175 C -0.280406 0.453031 -0.271638 C 1.002525 -0.296632 0.115605 C 2.281007 0.446622 -0.297065 C 3.604593 -0.203670 0.157598 H 3.547316 -0.344366 1.249568 C 4.785326 0.749683 -0.12356…	0	0	0	0	0	5	0	0	0	0	0	0	0	5	0	3	0	5	0
731	3694	CC(C)CCCCC[C@H](C)C(C)C	C13H28	41	-78.454	C 5.386173 -0.686798 -0.810134 H 5.100943 -1.584203 -1.372784 H 5.810441 -1.013137 0.146937 H 6.187813 -0.185424 -1.365612 C 4.188135 0.256500 -0.614032 C 2.957944 -0.473923 -0.001150 C 1.674178 0.375322 -0.128118 C 0.364644 -0.386359 0.125448 C -0.885905 0.472062 -0.108687 C -2.200932 -0.274839 0.153024 C -3.444664 0.590934 -0.092334 H -3.347955 1.515810 0.495441 C -4.791552 -0.071435 0.260423 C…	0	0	0	0	0	5	0	0	0	0	0	0	0	5	0	3	0	4	0
732	3695	CCCCCCC(C)(C)CC(C)C	C13H28	41	-77.4665	C -4.812099 -1.347167 -0.173400 H -4.471107 -2.142242 0.500335 H -4.816206 -1.754926 -1.192924 H -5.848639 -1.103583 0.090016 C -3.905007 -0.108868 -0.082093 C -2.443128 -0.465934 -0.466700 C -1.286578 0.152401 0.373840 C 0.036039 -0.260485 -0.332667 C 1.359527 0.151020 0.330010 C 2.585253 -0.295404 -0.480462 C 3.921345 0.099926 0.161248 H 3.952357 1.191861 0.294029 C 5.146741 -0.344629 -0.647750…	0	0	0	0	0	5	0	0	0	0	0	0	0	6	0	1	1	5	1
733	3696	CCCCC[C@@H](C)[C@@H](C)CC(C)C	C13H28	41	-77.6711	C 3.316485 -1.794602 -1.138495 H 2.981821 -1.265544 -2.037364 H 2.567069 -2.562932 -0.905625 H 4.251682 -2.309553 -1.389088 C 3.516141 -0.847039 0.054204 C 2.210629 -0.138343 0.478275 C 1.535165 0.765418 -0.576538 C 0.125834 1.270512 -0.139444 C -0.901946 0.119366 -0.065205 C -2.370844 0.568057 -0.036890 C -3.360155 -0.605070 -0.044968 H -3.182753 -1.225157 -0.936542 C -4.830622 -0.168461 -0.0183…	0	0	0	0	0	5	0	0	0	0	0	0	0	5	0	3	0	5	0
734	3697	CCCC[C@H](C)C[C@@H](C)CC(C)C	C13H28	41	-78.8156	C 4.401173 1.084962 -0.668453 H 3.754895 1.910360 -0.350529 H 4.252971 0.942211 -1.747286 H 5.439748 1.402378 -0.516219 C 4.106087 -0.212212 0.099990 C 2.667078 -0.720987 -0.126475 C 1.507636 0.210606 0.291462 C 0.168869 -0.429223 -0.139210 C -1.122358 0.386648 0.090091 C -2.346388 -0.466115 -0.309071 C -3.713049 0.119348 0.073422 H -3.722962 0.345424 1.150562 C -4.882994 -0.818582 -0.254230 C -6…	0	0	0	0	0	5	0	0	0	0	0	0	0	5	0	3	0	5	0
735	3698	CCC[C@@H](C)CC[C@@H](C)CC(C)C	C13H28	41	-78.6426	C -4.479495 -0.823963 -0.759117 H -3.984828 -1.745706 -0.433985 H -4.278545 -0.698357 -1.831533 H -5.559781 -0.969836 -0.639685 C -4.000730 0.401809 0.033619 C -2.492038 0.670582 -0.146140 C -1.513316 -0.442429 0.287068 C -0.070713 -0.033531 -0.083988 C 0.982677 -1.137490 0.100064 C 2.372789 -0.827104 -0.498072 C 3.054841 0.360856 0.211782 H 2.362341 1.212871 0.233077 C 4.371456 0.836315 -0.42027…	0	0	0	0	0	5	0	0	0	0	0	0	0	5	0	3	0	5	0
736	3699	CC[C@H](C)CCC[C@@H](C)CC(C)C	C13H28	41	-78.7852	C 4.445653 1.337347 -0.710314 H 3.747656 2.081217 -0.310906 H 4.248344 1.239183 -1.786258 H 5.458877 1.740651 -0.595078 C 4.312244 -0.020600 -0.004412 C 2.912500 -0.644836 -0.182515 C 1.702512 0.156135 0.345780 C 0.395919 -0.574573 -0.032083 C -0.899321 0.207251 0.233785 C -2.147200 -0.531432 -0.272919 C -3.497251 0.135152 0.064738 H -3.531014 0.281811 1.156922 C -4.660196 -0.807661 -0.310304 C -…	0	0	0	0	0	5	0	0	0	0	0	0	0	5	0	3	0	5	0
737	3700	CC(C)CCCC[C@@H](C)CC(C)C	C13H28	41	-79.2675	C -4.938299 -1.356318 -0.797176 H -4.843412 -1.219333 -1.881118 H -5.781934 -0.741204 -0.457128 H -5.197468 -2.405755 -0.612627 C -3.643660 -0.965213 -0.067107 C -3.276513 0.497391 -0.394947 C -1.957143 1.056387 0.182968 C -0.725178 0.287241 -0.337463 C 0.617406 0.702683 0.282395 C 1.789219 -0.176837 -0.176774 C 3.133401 0.242968 0.434292 H 3.368293 1.273597 0.125510 C 4.329541 -0.666406 0.088034…	0	0	0	0	0	5	0	0	0	0	0	0	0	5	0	3	0	4	0
738	3701	CCCCCC(C)(C)CCC(C)C	C13H28	41	-80.0325	C -2.518528 -2.151105 1.277650 H -2.202196 -1.541674 2.130764 H -1.663139 -2.768373 0.971365 H -3.305154 -2.828771 1.630520 C -3.019107 -1.293228 0.105278 C -1.935676 -0.338016 -0.439444 C -1.461979 0.725698 0.563265 C -0.488859 1.813154 0.028390 C 0.789200 1.200086 -0.606201 C 1.642345 0.278955 0.278668 C 2.890912 -0.245201 -0.445001 H 2.585843 -0.782316 -1.355725 C 3.758167 -1.169622 0.419181 C…	0	0	0	0	0	5	0	0	0	0	0	0	0	6	0	1	1	5	0
739	3702	CCCC[C@H](C)[C@H](C)CCC(C)C	C13H28	41	-77.6873	C -4.674297 -1.534654 -0.778490 H -4.344370 -1.895967 -1.759960 H -5.323961 -0.665278 -0.945411 H -5.285347 -2.320861 -0.319072 C -3.479658 -1.163641 0.113090 C -2.600075 -0.100674 -0.576295 C -1.280367 0.213640 0.147394 C -0.314522 1.112631 -0.656090 C 1.123023 1.170989 -0.057385 C 1.861340 -0.178675 -0.198409 C 3.380682 -0.108521 0.015796 H 3.808043 0.648451 -0.659241 C 4.086221 -1.450551 -0.22…	0	0	0	0	0	5	0	0	0	0	0	0	0	5	0	3	0	5	0
740	3703	CCC[C@@H](C)C[C@H](C)CCC(C)C	C13H28	41	-78.7707	C 5.443928 -0.507654 -0.565607 H 5.276278 -1.393270 -1.190331 H 5.716783 -0.856351 0.439221 H 6.306363 0.032940 -0.973685 C 4.196791 0.387671 -0.515577 C 2.981056 -0.406849 0.003953 C 1.641655 0.342298 -0.070257 C 0.393983 -0.519448 0.223682 C -0.879426 0.295175 -0.092355 C -2.240652 -0.422490 0.039485 C -3.381058 0.586499 -0.216535 H -3.191028 1.487267 0.385792 C -4.795122 0.082060 0.104556 C -5…	0	0	0	0	0	5	0	0	0	0	0	0	0	5	0	3	0	5	0
741	3704	CC[C@H](C)CC[C@H](C)CCC(C)C	C13H28	41	-78.6803	C -4.987655 -1.141750 -0.844016 H -4.809462 -1.138639 -1.926117 H -5.621320 -0.276346 -0.608915 H -5.558533 -2.045736 -0.600145 C -3.668896 -1.085580 -0.058402 C -2.853303 0.160808 -0.458577 C -1.438307 0.224078 0.138345 C -0.539334 1.334856 -0.444973 C 0.905534 1.253557 0.094738 C 1.681967 -0.012905 -0.299536 C 3.193035 0.027016 0.013704 H 3.609502 0.923435 -0.474608 C 3.893254 -1.202344 -0.6026…	0	0	0	0	0	5	0	0	0	0	0	0	0	5	0	3	0	5	0
742	3705	CC(C)CCC[C@H](C)CCC(C)C	C13H28	41	-79.3757	C 5.568064 -0.643386 -0.852145 H 5.309426 -1.438021 -1.562340 H 5.880778 -1.123455 0.084585 H 6.434636 -0.103777 -1.252693 C 4.382322 0.303541 -0.613913 C 3.155248 -0.482620 -0.108791 C 1.861862 0.339859 -0.001740 C 0.583733 -0.484382 0.263564 C -0.660813 0.421648 0.153855 C -2.012839 -0.306998 0.173952 C -3.198789 0.643091 -0.048603 H -3.136340 1.457856 0.687936 C -4.593658 -0.005084 0.058920 C …	0	0	0	0	0	5	0	0	0	0	0	0	0	5	0	3	0	4	0
743	3706	CCCCCC[C@H](C)C(C)(C)CC	C13H28	41	-76.5277	C 4.311853 -1.597832 -0.827545 H 4.373794 -2.283630 0.024662 H 5.170777 -0.920180 -0.773786 H 4.427889 -2.198831 -1.736978 C 2.977847 -0.837977 -0.864176 C 2.647507 0.046871 0.369487 C 1.297970 0.828564 0.146342 C 0.093989 -0.082544 -0.201027 C -1.274351 0.522043 0.151669 C -2.451589 -0.391158 -0.216078 C -3.820909 0.197069 0.147843 H -3.850368 0.409553 1.227118 C -4.998858 -0.714806 -0.218964 C …	0	0	0	0	0	5	0	0	0	0	0	0	0	6	0	1	1	7	0
744	3707	CCCCC[C@@H](C)CC(C)(C)CC	C13H28	41	-77.5272	C -4.169197 -2.034276 -0.438619 H -4.952425 -1.468563 0.078054 H -3.802891 -2.803323 0.250124 H -4.644210 -2.551416 -1.280374 C -3.039753 -1.128428 -0.946318 C -2.260968 -0.298737 0.113920 C -1.142705 0.461058 -0.659674 C -0.273640 1.489754 0.115741 C 1.216165 1.402588 -0.285725 C 1.954471 0.152702 0.211839 C 3.426047 0.105716 -0.220850 H 3.483244 0.138522 -1.319258 C 4.176130 -1.132622 0.286640 …	0	0	0	0	0	5	0	0	0	0	0	0	0	6	0	1	1	6	1
745	3708	CCCC[C@H](C)CCC(C)(C)CC	C13H28	41	-79.2141	C -3.423099 1.698691 1.139982 H -4.189474 2.029140 0.430199 H -2.477213 2.170927 0.851526 H -3.698370 2.094962 2.124260 C -3.309254 0.169830 1.194988 C -2.947891 -0.553526 -0.130574 C -1.608496 -0.042879 -0.731727 C -0.366430 -0.127274 0.169664 C 0.963021 0.236693 -0.528836 C 2.151969 -0.097440 0.397135 C 3.542476 0.011795 -0.244328 H 3.567390 -0.593675 -1.163164 C 4.673133 -0.443251 0.688619 C 6…	0	0	0	0	0	5	0	0	0	0	0	0	0	6	0	1	1	6	0
746	3709	CCC[C@@H](C)CCCC(C)(C)CC	C13H28	41	-78.5158	C 4.324673 1.727411 -0.848820 H 3.439549 2.338735 -1.055217 H 4.556451 1.158019 -1.755799 H 5.160328 2.414982 -0.673935 C 4.129064 0.814635 0.368988 C 3.001902 -0.253702 0.287964 C 1.631848 0.455474 0.112336 C 0.375417 -0.430864 0.118775 C -0.906563 0.384950 -0.110244 C -2.226316 -0.407935 -0.001396 C -3.427840 0.560107 -0.033779 H -3.243340 1.368188 0.689565 C -4.792919 -0.067372 0.282559 C -5.9…	0	0	0	0	0	5	0	0	0	0	0	0	0	6	0	1	1	6	0
747	3710	CC[C@H](C)CCCCC(C)(C)CC	C13H28	41	-79.2796	C 3.380538 2.189978 -0.556066 H 2.366403 2.250958 -0.966939 H 4.066437 2.006991 -1.390581 H 3.624858 3.175821 -0.143741 C 3.496398 1.114605 0.531809 C 3.211784 -0.350233 0.101917 C 1.801380 -0.515743 -0.526575 C 0.596438 -0.088273 0.324776 C -0.743789 -0.328296 -0.386730 C -1.955655 0.095838 0.455116 C -3.325513 -0.019703 -0.246049 H -3.264234 0.547203 -1.189622 C -4.419207 0.641455 0.619262 C -5…	0	0	0	0	0	5	0	0	0	0	0	0	0	6	0	1	1	6	0
748	3711	CCCCCCC(C)(C)[C@H](C)CC	C13H28	41	-77.1328	C 3.980187 2.189834 0.577354 H 3.378518 2.586112 1.404865 H 3.825119 2.844941 -0.287050 H 5.034771 2.274050 0.864578 C 3.610695 0.730705 0.277460 C 2.126588 0.524669 -0.117616 C 1.622728 -0.950542 0.086337 C 0.159527 -1.127342 -0.415408 C -0.920915 -0.234416 0.214007 C -2.322544 -0.527268 -0.340952 C -3.421226 0.348923 0.274194 H -3.428226 0.210779 1.365871 C -4.821794 0.057476 -0.280029 C -5.912…	0	0	0	0	0	5	0	0	0	0	0	0	0	6	0	1	1	7	0
749	3712	CCCCC[C@@H](C)[C@@H](C)[C@H](C)CC	C13H28	41	-75.5036	C 5.259693 -0.152689 -0.800928 H 5.093666 -1.026794 -1.443129 H 5.681247 -0.511616 0.144628 H 6.021771 0.471664 -1.281590 C 3.959871 0.634425 -0.590209 C 2.809340 -0.195586 0.024783 C 1.426523 0.496997 -0.176110 C 0.201206 -0.407866 0.171630 C -1.114435 0.192929 -0.383313 C -2.400151 -0.363122 0.247718 C -3.674702 0.274610 -0.321667 H -3.631363 1.365092 -0.180567 C -4.965307 -0.264555 0.308694 C …	0	0	0	0	0	5	0	0	0	0	0	0	0	5	0	3	0	6	0
750	3713	CCCC[C@H](C)C[C@@H](C)[C@H](C)CC	C13H28	41	-77.0127	C 5.326926 -0.042437 -0.939719 H 5.073910 -0.150123 -2.002087 H 5.667034 -1.019343 -0.579105 H 6.177779 0.645123 -0.869985 C 4.130958 0.485604 -0.137274 C 2.848870 -0.367921 -0.257290 C 1.602088 0.391040 0.290546 C 0.289976 -0.265277 -0.193883 C -1.027139 0.491121 0.093823 C -2.223850 -0.370408 -0.365269 C -3.607837 0.137892 0.062588 H -3.620349 0.282545 1.153618 C -4.746617 -0.812705 -0.331654 C…	0	0	0	0	0	5	0	0	0	0	0	0	0	5	0	3	0	6	0
751	3714	CCC[C@@H](C)CC[C@@H](C)[C@H](C)CC	C13H28	41	-76.8077	C 5.378824 -0.552995 -0.848423 H 5.105915 -1.460781 -1.401165 H 5.797723 -0.864764 0.114727 H 6.179668 -0.053716 -1.406025 C 4.169525 0.375256 -0.678256 C 2.959884 -0.273643 0.029662 C 1.655676 0.550777 -0.180040 C 0.403174 -0.234943 0.274201 C -0.914745 0.277523 -0.328108 C -2.189940 -0.431464 0.178051 C -3.442956 0.311122 -0.332649 H -3.322805 1.383744 -0.119701 C -4.778484 -0.151939 0.266676 C…	0	0	0	0	0	5	0	0	0	0	0	0	0	5	0	3	0	6	0
752	3715	CC[C@H](C)CCC[C@@H](C)[C@H](C)CC	C13H28	41	-76.9708	C -5.445330 -0.513209 -1.041871 H -5.127556 -0.653303 -2.082780 H -5.877335 0.490217 -0.959407 H -6.248600 -1.231543 -0.841111 C -4.273339 -0.718378 -0.073685 C -3.058575 0.199111 -0.335645 C -1.782373 -0.309049 0.398020 C -0.509597 0.405945 -0.107163 C 0.810285 -0.292618 0.255941 C 2.036206 0.415942 -0.339172 C 3.405026 -0.167355 0.070005 H 3.441546 -0.187169 1.171722 C 4.539964 0.760594 -0.4125…	0	0	0	0	0	5	0	0	0	0	0	0	0	5	0	3	0	6	0
753	3716	CCCCCC(C)(C)C[C@H](C)CC	C13H28	41	-76.9939	C 5.283915 -0.910043 0.030743 H 5.310502 -0.726624 1.112593 H 5.815374 -0.086555 -0.458343 H 5.852521 -1.826899 -0.163110 C 3.842107 -1.046201 -0.471261 C 2.916142 0.145733 -0.143450 C 1.461163 -0.155389 -0.600017 C 0.301040 0.176490 0.384885 C -1.020727 -0.106690 -0.384140 C -2.343246 0.074381 0.376312 C -3.569522 -0.217017 -0.500796 H -3.554968 0.445292 -1.379417 C -4.904513 -0.048289 0.236014 …	0	0	0	0	0	5	0	0	0	0	0	0	0	6	0	1	1	6	1
754	3717	CCCC[C@H](C)[C@H](C)C[C@H](C)CC	C13H28	41	-76.5774	C -4.947004 0.092048 -0.913770 H -5.198874 0.799237 -0.113440 H -5.478244 -0.843675 -0.707916 H -5.348209 0.496131 -1.850408 C -3.430379 -0.113299 -1.010971 C -2.760657 -0.622552 0.283233 C -1.218191 -0.543267 0.192356 C -0.608470 0.874370 0.303330 C 0.800415 0.956232 -0.357205 C 1.861910 0.084044 0.348038 C 3.170421 -0.095659 -0.436777 H 2.941037 -0.478586 -1.442875 C 4.159144 -1.047355 0.250226…	0	0	0	0	0	5	0	0	0	0	0	0	0	5	0	3	0	6	0
755	3718	CCC[C@@H](C)C[C@H](C)C[C@H](C)CC	C13H28	41	-78.2883	C 4.640866 -1.974819 -0.193153 H 3.967126 -2.827907 -0.343220 H 4.928014 -1.960955 0.863918 H 5.549939 -2.165038 -0.775300 C 3.977551 -0.663509 -0.630581 C 2.633899 -0.346517 0.061256 C 1.972249 0.863690 -0.633553 C 0.574046 1.305138 -0.143965 C -0.468760 0.180823 -0.320937 C -1.915652 0.475558 0.133906 C -2.819243 -0.726654 -0.215509 H -2.632195 -1.010604 -1.261796 C -4.326775 -0.493367 -0.04217…	0	0	0	0	0	5	0	0	0	0	0	0	0	5	0	3	0	6	0
756	3719	CC[C@H](C)CC[C@H](C)C[C@H](C)CC	C13H28	41	-77.9482	C -4.759816 -1.206845 -0.986940 H -5.306889 -0.260939 -1.089164 H -5.233611 -1.778267 -0.181614 H -4.901132 -1.771872 -1.915521 C -3.269719 -0.957502 -0.721532 C -2.967622 -0.069986 0.503537 C -1.457477 0.225529 0.648159 C -0.759548 0.978994 -0.505163 C 0.747105 1.173217 -0.221394 C 1.569609 -0.122231 -0.134194 C 3.100065 0.078965 -0.124639 H 3.363569 0.663531 -1.021481 C 3.813002 -1.285162 -0.23…	0	0	0	0	0	5	0	0	0	0	0	0	0	5	0	3	0	6	0
757	3720	CCCCC[C@H](C)C(C)(C)CCC	C13H28	41	-77.1081	C 4.768230 -1.589917 -0.389232 H 4.914374 -1.830324 0.671249 H 5.523988 -0.843800 -0.664421 H 4.971271 -2.498685 -0.967502 C 3.350895 -1.065496 -0.649541 C 3.048313 0.210448 0.151179 C 1.651379 0.869544 -0.042245 C 0.489758 -0.129519 0.310792 C -0.919948 0.510013 0.233814 C -2.058951 -0.498579 0.015866 C -3.444290 0.158728 -0.043499 H -3.627458 0.706712 0.892982 C -4.587287 -0.837828 -0.276342 C …	0	0	0	0	0	5	0	0	0	0	0	0	0	6	0	1	1	7	0
758	3721	CCCC[C@H](C)CC(C)(C)CCC	C13H28	41	-77.3503	C 4.710836 -1.633861 -0.886105 H 5.021630 -0.919388 -1.658463 H 4.236743 -2.482638 -1.394496 H 5.616156 -2.005063 -0.392095 C 3.752353 -0.983137 0.118738 C 2.475120 -0.459600 -0.555511 C 1.417114 0.243452 0.341864 C 0.216793 0.591257 -0.588794 C -0.953606 1.431348 -0.006512 C -2.327972 0.912708 -0.486584 C -2.769738 -0.426823 0.117645 H -2.020593 -1.203701 -0.090547 C -4.135004 -0.902456 -0.39721…	0	0	0	0	0	5	0	0	0	0	0	0	0	6	0	1	1	6	1
759	3722	CCC[C@@H](C)CCC(C)(C)CCC	C13H28	41	-78.9638	C 2.865880 2.753723 -1.158634 H 2.518267 2.541140 -2.177306 H 3.960554 2.681280 -1.162723 H 2.601636 3.791905 -0.926653 C 2.249551 1.779674 -0.147405 C 2.604157 0.317628 -0.457008 C 2.064173 -0.767933 0.513224 C 0.515720 -0.725122 0.643818 C -0.294527 -0.863478 -0.655019 C -1.825207 -0.958704 -0.457991 C -2.425248 0.358401 0.076984 H -1.855271 0.684784 0.957089 C -3.907776 0.291655 0.472987 C -4.…	0	0	0	0	0	5	0	0	0	0	0	0	0	6	0	1	1	6	0
760	3723	CCCCCC(C)(C)[C@@H](C)CCC	C13H28	41	-77.112	C -4.966892 -1.396331 -0.507466 H -5.175831 -0.782193 -1.392297 H -5.492202 -0.940773 0.341118 H -5.406158 -2.385996 -0.678045 C -3.460680 -1.490598 -0.240612 C -2.808539 -0.117621 -0.013454 C -1.286295 -0.174985 0.270790 C -0.534968 1.165511 -0.061769 C 0.968098 1.091048 0.337389 C 1.817979 -0.020857 -0.296831 C 3.285306 0.031363 0.152573 H 3.708292 1.015570 -0.098924 C 4.157454 -1.066590 -0.469…	0	0	0	0	0	5	0	0	0	0	0	0	0	6	0	1	1	7	0
761	3724	CCCC[C@H](C)[C@H](C)[C@@H](C)CCC	C13H28	41	-75.4401	C 5.506669 -0.466803 -0.901001 H 5.281969 -0.994766 -1.836109 H 5.772522 -1.222775 -0.151703 H 6.392326 0.155343 -1.074276 C 4.312284 0.375160 -0.439034 C 3.049471 -0.464807 -0.194752 C 1.806599 0.352581 0.227844 C 0.486132 -0.446026 0.000911 C -0.812153 0.409541 0.152792 C -2.045486 -0.336045 -0.415103 C -3.405523 0.209919 0.045674 H -3.449343 0.185931 1.145020 C -4.594016 -0.578214 -0.521885 C …	0	0	0	0	0	5	0	0	0	0	0	0	0	5	0	3	0	6	0
762	3725	CCC[C@@H](C)C[C@H](C)[C@@H](C)CCC	C13H28	41	-76.897	C 5.605158 -0.738441 -0.504427 H 5.407501 -1.803302 -0.679407 H 5.928529 -0.630518 0.538379 H 6.445187 -0.445832 -1.144893 C 4.361351 0.110657 -0.789257 C 3.162630 -0.276877 0.089648 C 1.856799 0.491009 -0.213774 C 0.618386 -0.209034 0.424339 C -0.700298 0.324580 -0.178567 C -1.998327 -0.436334 0.176769 C -3.211446 0.315437 -0.413004 H -3.125472 1.379210 -0.146026 C -4.588277 -0.185645 0.045783 C…	0	0	0	0	0	5	0	0	0	0	0	0	0	5	0	3	0	6	0
763	3726	CCCC[C@H](C)C(C)(C)CCCC	C13H28	41	-77.1442	C 4.656266 -2.092944 -0.367658 H 4.635667 -2.135537 -1.463728 H 4.073193 -2.943778 0.006174 H 5.695144 -2.235963 -0.048726 C 4.090157 -0.764997 0.145575 C 2.634311 -0.522690 -0.278604 C 2.084713 0.815053 0.239755 C 0.624966 1.193266 -0.147477 C -0.399778 0.104591 0.339152 C -1.878229 0.482941 0.068929 C -2.834588 -0.717997 0.000218 H -2.502468 -1.397513 -0.799065 C -4.293031 -0.314995 -0.255830 C…	0	0	0	0	0	5	0	0	0	0	0	0	0	6	0	1	1	7	0
764	3727	CCCCC(CCCC)CCCC	C13H28	41	-75.9538	C -3.083172 -3.626223 -0.846904 H -2.314958 -4.185520 -1.395222 H -3.574943 -2.954729 -1.561699 H -3.832348 -4.345815 -0.497065 C -2.471236 -2.842386 0.318622 C -1.414249 -1.821726 -0.125683 C -0.811553 -1.038416 1.050507 C 0.289529 -0.008524 0.699325 C 1.552983 -0.703363 0.141564 C 2.830822 0.148316 0.167399 C 4.071503 -0.610040 -0.323526 H 4.213221 -1.509742 0.292237 C 5.348633 0.235801 -0.2927…	0	0	0	0	0	3	0	0	0	0	0	0	0	9	0	1	0	3	0
765	3728	CCCCC(CCCC)CC(C)C	C13H28	41	-76.1854	C -4.610894 -1.979088 0.216410 H -5.104813 -1.030419 -0.027955 H -4.591753 -2.068515 1.309674 H -5.237215 -2.790043 -0.172807 C -3.195809 -2.033418 -0.368445 C -2.282922 -0.913833 0.149425 C -0.859311 -0.979371 -0.421787 C 0.089356 0.143685 0.057347 C 1.569594 -0.242428 -0.167217 C 2.118797 -1.286444 0.817339 C 3.607811 -1.621216 0.623088 H 4.197743 -0.695468 0.687689 C 3.932145 -2.341385 -0.6914…	0	0	0	0	0	4	0	0	0	0	0	0	0	7	0	2	0	4	0
766	3729	CCCCC(CCCC)[C@@H](C)CC	C13H28	41	-74.8288	C 1.016132 4.445773 -0.260259 H 0.357878 4.685777 -1.104455 H 2.000271 4.190136 -0.672223 H 1.132804 5.355594 0.339771 C 0.448503 3.292527 0.573786 C 0.269998 1.996451 -0.226996 C -0.320419 0.843994 0.600983 C -0.481049 -0.492578 -0.178280 C 0.641449 -1.502884 0.147902 C 2.058315 -1.062929 -0.246799 C 3.119407 -2.137968 0.026012 H 3.099340 -2.403720 1.092669 C 4.535554 -1.702910 -0.364652 H 0.632…	0	0	0	0	0	4	0	0	0	0	0	0	0	7	0	2	0	5	0
767	3730	CCCCC(CCCC)C(C)(C)C	C13H28	41	-76.4765	C 4.284532 -2.172040 -0.259610 H 4.309860 -2.188956 -1.356256 H 3.752219 -3.072354 0.071629 H 5.317928 -2.246114 0.098188 C 3.601324 -0.902465 0.258984 C 2.149542 -0.758225 -0.216786 C 1.470109 0.524560 0.285955 C -0.009627 0.657286 -0.149482 C -0.890411 -0.370687 0.623324 C -1.751415 -1.277714 -0.268913 C -2.603339 -2.278662 0.521894 H -1.947075 -2.889048 1.158911 C -3.444364 -3.196464 -0.371482…	0	0	0	0	0	5	0	0	0	0	0	0	0	6	0	1	1	6	0
768	3731	CCCCC[C@@H](CCC)[C@H](C)CC	C13H28	41	-75.3642	C -2.375657 3.634839 -0.334059 H -2.859347 3.410890 -1.292981 H -1.461061 4.200703 -0.550945 H -3.046905 4.291245 0.231642 C -2.062177 2.350823 0.441753 C -1.110273 1.413213 -0.315685 C -0.748686 0.106511 0.428975 C 0.558295 -0.510283 -0.124219 C 1.838310 0.212128 0.322431 C 3.116923 -0.402746 -0.261889 C 4.401287 0.300720 0.195605 H 4.349998 1.363534 -0.081061 C 5.673061 -0.318689 -0.392927 H 1.…	0	0	0	0	0	4	0	0	0	0	0	0	0	7	0	2	0	5	0
769	3732	CCCCC[C@@H](CCC)C(C)(C)C	C13H28	41	-75.8288	C 2.099730 3.520078 0.306698 H 2.760507 3.353296 1.166645 H 1.168225 3.957144 0.687754 H 2.577144 4.265813 -0.339415 C 1.831275 2.213970 -0.447683 C 1.144932 1.148320 0.420539 C 0.852456 -0.197860 -0.308182 C -0.641033 -0.575162 -0.150363 C -1.585877 0.312869 -0.976882 C -3.076135 -0.046284 -0.846711 C -3.689454 0.229145 0.533757 H -3.170787 -0.362327 1.299561 C -5.189524 -0.078612 0.591911 H -1.…	0	0	0	0	0	5	0	0	0	0	0	0	0	6	0	1	1	6	0
770	3733	CCCC[C@@H](CCC)CCC(C)C	C13H28	41	-76.8337	C 4.276773 -1.437883 -1.090798 H 4.108649 -1.155159 -2.136952 H 3.965643 -2.484589 -0.975147 H 5.355436 -1.390311 -0.899059 C 3.498319 -0.525225 -0.131086 C 1.990271 -0.563797 -0.453366 C 1.138448 0.466561 0.304023 C -0.354173 0.492625 -0.099142 C -1.106691 -0.735566 0.462096 C -2.442865 -1.048211 -0.226637 C -3.162841 -2.264765 0.370699 H -2.499371 -3.139927 0.319036 C -4.487471 -2.586874 -0.328…	0	0	0	0	0	4	0	0	0	0	0	0	0	7	0	2	0	4	0
771	3734	CCCC[C@@H](CCC)C[C@H](C)CC	C13H28	41	-76.7088	C -4.135134 -2.038699 -0.646820 H -4.679859 -1.086248 -0.628008 H -4.341886 -2.557603 0.295515 H -4.560162 -2.646732 -1.453753 C -2.634595 -1.812728 -0.866512 C -1.953738 -0.884794 0.162843 C -0.516385 -0.564759 -0.303568 C 0.300783 0.432045 0.549376 C 1.730698 0.611491 -0.011948 C 2.649851 -0.609796 0.138603 C 4.081339 -0.350648 -0.350497 H 4.053080 -0.042328 -1.405423 C 5.001425 -1.566368 -0.19…	0	0	0	0	0	4	0	0	0	0	0	0	0	7	0	2	0	5	0
772	3735	CCCC[C@@H](CCC)[C@H](C)CCC	C13H28	41	-75.4133	C 4.232944 -2.100706 -0.962626 H 4.882618 -1.220095 -0.884158 H 3.919714 -2.186492 -2.010525 H 4.838016 -2.982525 -0.722325 C 3.022656 -1.980613 -0.029798 C 2.153520 -0.752847 -0.339986 C 0.853969 -0.643470 0.487832 C -0.081703 0.475574 -0.064472 C -1.553992 0.283288 0.370062 C -2.289439 -0.880757 -0.310048 C -3.754307 -1.009171 0.129315 H -3.794567 -1.146296 1.219405 C -4.492901 -2.162673 -0.557…	0	0	0	0	0	4	0	0	0	0	0	0	0	7	0	2	0	5	0
773	3736	CCCCC(C)(CCC)CCCC	C13H28	41	-77.6099	C -5.164817 -0.606973 -0.209375 H -5.298858 0.477402 -0.110366 H -5.319595 -1.050041 0.782269 H -5.956927 -0.981183 -0.868143 C -3.774361 -0.945723 -0.756375 C -2.632414 -0.440411 0.137509 C -1.246294 -0.779827 -0.430899 C -0.000004 -0.374359 0.408542 C 1.246286 -0.779855 -0.430888 C 2.632408 -0.440422 0.137506 C 3.774353 -0.945751 -0.756374 H 3.684092 -2.034605 -0.878153 C 5.164810 -0.606981 -0.…	0	0	0	0	0	4	0	0	0	0	0	0	0	8	0	0	1	6	0
774	3737	CCCCC[C@H](CCC)CC(C)C	C13H28	41	-77.7645	C 4.265593 -1.327051 -1.000226 H 4.209474 -0.790874 -1.955288 H 4.083451 -2.390312 -1.205098 H 5.290704 -1.233100 -0.622174 C 3.245849 -0.779936 0.011032 C 1.821352 -0.869912 -0.574656 C 0.663875 -0.299387 0.276488 C -0.679256 -0.572642 -0.437493 C -1.938701 -0.199228 0.356971 C -3.237571 -0.632253 -0.336532 C -4.504880 -0.255189 0.441473 H -4.460603 -0.703648 1.444288 C -5.796324 -0.693382 -0.25…	0	0	0	0	0	4	0	0	0	0	0	0	0	7	0	2	0	4	0
775	3738	CCCCCC(C)(CCC)CCC	C13H28	41	-77.5999	C 4.448590 -1.477713 -0.991033 H 4.362546 -1.052712 -1.998849 H 4.267064 -2.556586 -1.072343 H 5.483594 -1.338112 -0.658233 C 3.456383 -0.819629 -0.024413 C 1.999979 -0.996744 -0.479997 C 0.879021 -0.425037 0.435665 C -0.466920 -0.690775 -0.299262 C -1.755052 -0.173229 0.358766 C -3.013333 -0.549119 -0.437163 C -4.314297 -0.035492 0.193088 H -4.400434 -0.428224 1.216345 C -5.564893 -0.415882 -0.6…	0	0	0	0	0	4	0	0	0	0	0	0	0	8	0	0	1	6	0
776	3739	CCCC[C@H](C)C(CCC)CCC	C13H28	41	-75.3892	C -1.830020 3.786299 -0.579016 H -2.783332 3.643058 -1.102849 H -1.050448 3.907118 -1.341458 H -1.895904 4.726230 -0.018973 C -1.522367 2.603319 0.345520 C -1.438370 1.265681 -0.404571 C -1.142629 0.034611 0.484135 C 0.337185 -0.001831 0.977425 C 1.335243 -0.427655 -0.122879 C 2.805209 -0.106934 0.187285 C 3.760716 -0.494283 -0.949431 H 3.659251 -1.569143 -1.156954 C 5.226728 -0.170075 -0.644180 …	0	0	0	0	0	4	0	0	0	0	0	0	0	7	0	2	0	5	0
777	3740	CCC[C@@H](C)CC(CCC)CCC	C13H28	41	-76.5846	C 4.142331 -2.411415 -0.672762 H 4.990408 -1.870843 -0.234364 H 4.137637 -2.199458 -1.749185 H 4.329391 -3.483988 -0.546020 C 2.820414 -1.992350 -0.020019 C 2.530864 -0.491717 -0.173934 C 1.250659 0.007582 0.535571 C -0.021468 -0.528623 -0.159595 C -1.383147 -0.155866 0.467831 C -2.524466 -0.693859 -0.422109 C -3.934012 -0.206811 -0.057176 H -4.198083 -0.536396 0.955819 C -5.003960 -0.700553 -1.0…	0	0	0	0	0	4	0	0	0	0	0	0	0	7	0	2	0	5	0
778	3741	CCCC(CCC)CC[C@@H](C)CC	C13H28	41	-76.1064	C 3.020349 3.508184 -0.005401 H 3.368692 3.491094 1.034752 H 2.139072 4.160362 -0.046837 H 3.806598 3.972187 -0.612014 C 2.689189 2.096517 -0.501716 C 1.577502 1.421694 0.314721 C 1.214475 -0.011960 -0.134842 C -0.175502 -0.430647 0.398166 C -1.362559 0.232493 -0.317915 C -2.755883 -0.258365 0.130501 C -3.840236 0.291546 -0.820270 H -3.874079 1.387488 -0.727295 C -5.246062 -0.282040 -0.606654 H -…	0	0	0	0	0	4	0	0	0	0	0	0	0	7	0	2	0	5	0
779	3742	CCCC(CCC)CCCC(C)C	C13H28	41	-76.8629	C -2.982064 3.578732 -0.029139 H -3.384876 3.565789 -1.049495 H -2.076801 4.198480 -0.040363 H -3.718093 4.076297 0.612848 C -2.676597 2.160051 0.463617 C -1.634383 1.438046 -0.402515 C -1.301621 -0.004621 0.041282 C 0.044670 -0.475765 -0.554509 C 1.293535 0.134514 0.099452 C 2.600120 -0.360692 -0.537390 C 3.889499 0.276095 0.019012 H 3.785476 1.369061 -0.069484 C 5.104290 -0.147398 -0.820562 H 4…	0	0	0	0	0	4	0	0	0	0	0	0	0	7	0	2	0	4	0
780	3743	CCCC[C@H](CCC(C)C)C(C)C	C13H28	41	-77.2639	C 3.538453 -1.137791 1.367909 H 2.711892 -1.188403 2.084642 H 4.030340 -0.163691 1.492633 H 4.263644 -1.912249 1.645122 C 3.061001 -1.325846 -0.080400 C 2.052645 -0.242875 -0.516305 C 0.728824 -0.242381 0.264675 C -0.367663 0.689599 -0.303174 C -1.747019 0.350527 0.310981 C -2.404781 -0.914417 -0.261075 C -3.759225 -1.237447 0.383683 H -3.622594 -1.366810 1.466851 C -4.423845 -2.488717 -0.199603 …	0	0	0	0	0	5	0	0	0	0	0	0	0	5	0	3	0	5	0
781	3744	CCCC[C@H](C[C@H](C)CC)C(C)C	C13H28	41	-76.6488	C -4.547951 -1.392884 -0.228292 H -4.954904 -0.479113 0.223247 H -4.543898 -2.170661 0.542975 H -5.244698 -1.713177 -1.011503 C -3.150365 -1.147361 -0.808994 C -2.115769 -0.581137 0.186758 C -0.796234 -0.255785 -0.549933 C 0.199579 0.664872 0.196782 C 1.636959 0.481553 -0.345162 C 2.336887 -0.796743 0.139314 C 3.745468 -0.975282 -0.442635 H 3.682846 -1.000559 -1.539937 C 4.450624 -2.240275 0.0574…	0	0	0	0	0	5	0	0	0	0	0	0	0	5	0	3	0	6	0
782	3745	CCCC[C@@H](C(C)C)[C@@H](C)CCC	C13H28	41	-75.4056	C 3.588821 -2.682094 -0.693646 H 3.214415 -2.838298 -1.712968 H 3.115895 -3.434409 -0.050197 H 4.666738 -2.880861 -0.700456 C 3.284160 -1.262575 -0.202283 C 1.780039 -0.950528 -0.183309 C 1.421328 0.499808 0.212960 C -0.062581 0.831348 -0.132341 C -1.070784 -0.058850 0.656100 C -2.020767 -0.880186 -0.229271 C -3.017838 -1.729607 0.568906 H -2.464996 -2.398952 1.243711 C -3.952974 -2.558350 -0.317…	0	0	0	0	0	5	0	0	0	0	0	0	0	5	0	3	0	6	0
783	3746	CCCCC(C)(CCCC)C(C)C	C13H28	41	-75.4641	C -3.899947 -1.659736 -1.143822 H -3.319230 -2.506274 -1.531921 H -3.663182 -0.785624 -1.760521 H -4.961265 -1.888913 -1.294270 C -3.594609 -1.416877 0.339325 C -2.108235 -1.172373 0.658313 C -1.557656 0.135092 0.061279 C -0.097334 0.527021 0.433610 C 0.863809 -0.596147 -0.058749 C 2.373909 -0.364305 0.110365 C 3.205057 -1.588898 -0.299418 H 2.897558 -2.454299 0.304855 C 4.714347 -1.372247 -0.149…	0	0	0	0	0	5	0	0	0	0	0	0	0	6	0	1	1	8	0
784	3747	CCCCC[C@@H](CC(C)C)C(C)C	C13H28	41	-77.1658	C 3.247174 -2.413345 -0.955000 H 3.512442 -1.938273 -1.907122 H 2.522658 -3.209637 -1.171505 H 4.150392 -2.887934 -0.553088 C 2.662883 -1.395009 0.036822 C 1.412068 -0.722527 -0.570012 C 0.816313 0.484410 0.193549 C -0.625382 0.774402 -0.289688 C -1.685502 -0.190182 0.263142 C -3.099016 0.099100 -0.258948 C -4.167595 -0.846611 0.304517 H -3.896036 -1.884282 0.063201 C -5.575410 -0.551915 -0.22336…	0	0	0	0	0	5	0	0	0	0	0	0	0	5	0	3	0	5	0
785	3748	CCCCC[C@H](C(C)C)[C@@H](C)CC	C13H28	41	-75.3111	C 3.687954 -2.186109 -0.725939 H 3.401142 -3.128935 -0.247817 H 4.495666 -1.743823 -0.128825 H 4.101857 -2.432161 -1.710676 C 2.503181 -1.219780 -0.858301 C 1.928038 -0.723188 0.486081 C 0.876659 0.417957 0.327188 C -0.405082 -0.052625 -0.425361 C -1.707835 0.113944 0.372433 C -2.956398 -0.335082 -0.396919 C -4.257978 -0.183556 0.401124 H -4.179913 -0.760995 1.333392 C -5.499893 -0.633520 -0.3751…	0	0	0	0	0	5	0	0	0	0	0	0	0	5	0	3	0	6	0
786	3749	CCCCC[C@@](C)(CCC)C(C)C	C13H28	41	-76.6933	C -1.481509 3.517930 -0.205338 H -0.661861 3.848466 0.444733 H -2.419525 3.681003 0.339895 H -1.491326 4.169723 -1.086577 C -1.317939 2.044976 -0.599363 C -1.304777 1.114567 0.623117 C -1.092678 -0.405993 0.366971 C 0.293403 -0.660586 -0.300673 C 1.526235 -0.013017 0.351363 C 2.838149 -0.447500 -0.318171 C 4.084951 0.199626 0.298517 H 3.993332 1.293466 0.236803 C 5.389996 -0.241448 -0.372181 H 5.…	0	0	0	0	0	5	0	0	0	0	0	0	0	6	0	1	1	8	0
787	3750	CCCC[C@H](C)[C@@H](CCC)C(C)C	C13H28	41	-75.405	C 2.261416 3.451730 0.224109 H 3.169769 3.301978 0.821126 H 1.479365 3.817241 0.901395 H 2.468796 4.245055 -0.503333 C 1.833081 2.153993 -0.468087 C 1.519357 1.019109 0.519322 C 1.101478 -0.323547 -0.153166 C -0.305991 -0.809513 0.309638 C -1.408111 0.195754 -0.096007 C -2.843832 -0.339763 0.011988 C -3.896804 0.653757 -0.497800 H -3.810867 1.593417 0.066484 C -5.330324 0.123808 -0.390187 H -5.59…	0	0	0	0	0	5	0	0	0	0	0	0	0	5	0	3	0	6	0
788	3751	CCC[C@@H](C)C[C@@H](CCC)C(C)C	C13H28	41	-76.5154	C 3.215229 2.969730 -0.211292 H 3.963317 2.697142 0.543480 H 2.516660 3.674230 0.257064 H 3.734392 3.501467 -1.016996 C 2.483039 1.730662 -0.738400 C 1.734452 0.967572 0.364152 C 0.935542 -0.268826 -0.110741 C -0.106607 -0.681518 0.957304 C -1.392607 0.177973 0.997589 C -2.334805 -0.165843 -0.175721 C -3.485546 0.825130 -0.402777 H -4.118623 0.880968 0.492235 C -4.356377 0.458765 -1.609604 H -4.8…	0	0	0	0	0	5	0	0	0	0	0	0	0	5	0	3	0	6	0
789	3752	CCC[C@H](CC[C@@H](C)CC)C(C)C	C13H28	41	-76.3287	C -3.903889 -2.551501 0.353042 H -4.207940 -2.285342 1.373010 H -3.227002 -3.411918 0.425249 H -4.800416 -2.877592 -0.186726 C -3.225664 -1.369983 -0.349099 C -1.956629 -0.895389 0.374037 C -1.212401 0.279026 -0.303297 C 0.253845 0.363376 0.187967 C 1.181378 -0.676476 -0.461850 C 2.604640 -0.764293 0.131077 C 3.403275 0.539368 -0.077303 H 3.530319 0.707287 -1.157633 C 4.774222 0.573962 0.609866 H…	0	0	0	0	0	5	0	0	0	0	0	0	0	5	0	3	0	6	0
790	3753	CCC[C@H](CCCC(C)C)C(C)C	C13H28	41	-77.2463	C -3.381854 3.105330 -0.137772 H -3.808889 2.954875 -1.137087 H -2.534170 3.793961 -0.242279 H -4.141079 3.602673 0.476774 C -2.941928 1.774762 0.482893 C -1.868038 1.056392 -0.347432 C -1.355040 -0.275770 0.247881 C 0.003867 -0.674039 -0.375452 C 1.203970 0.123745 0.158472 C 2.529667 -0.280892 -0.502085 C 3.761731 0.537672 -0.066497 H 3.531651 1.601176 -0.237552 C 4.979716 0.178025 -0.930844 H 4…	0	0	0	0	0	5	0	0	0	0	0	0	0	5	0	3	0	5	0
791	3754	CCCCCCC(C(C)C)C(C)C	C13H28	41	-76.1715	C -3.808889 1.539257 -0.460742 H -4.539945 0.763660 -0.212618 H -3.695685 1.556489 -1.553067 H -4.240787 2.501545 -0.161012 C -2.452475 1.321879 0.231874 C -1.710686 0.038433 -0.246659 C -0.383045 -0.180816 0.539281 C 0.890153 0.060302 -0.286518 C 2.183810 -0.143434 0.512115 C 3.457161 0.082928 -0.313096 C 4.751424 -0.119913 0.485233 H 4.753762 0.559793 1.349350 C 6.017675 0.108130 -0.346663 H 6.…	0	0	0	0	0	5	0	0	0	0	0	0	0	5	0	3	0	5	0
792	3755	CCCCC[C@@H](C)[C@H](CC)C(C)C	C13H28	41	-74.7273	C 3.948399 -1.636888 -0.382306 H 4.358233 -1.058138 -1.218893 H 3.375766 -2.468330 -0.809638 H 4.793006 -2.063283 0.172414 C 3.074898 -0.756211 0.520574 C 1.848041 -0.118272 -0.201890 C 0.504743 -0.716271 0.324694 C -0.743042 -0.024223 -0.268754 C -2.094556 -0.574181 0.214932 C -3.285526 0.270168 -0.258910 C -4.644658 -0.273301 0.200366 H -4.764615 -1.303435 -0.164437 C -5.827800 0.576741 -0.2740…	0	0	0	0	0	5	0	0	0	0	0	0	0	5	0	3	0	6	0
793	3756	CCCC[C@H](C)C[C@H](CC)C(C)C	C13H28	41	-76.7221	C 3.153381 2.511385 -0.227694 H 3.385009 2.611587 0.840067 H 2.220013 3.053590 -0.415423 H 3.945246 3.022015 -0.787990 C 3.060348 1.034724 -0.634417 C 1.984800 0.227172 0.132441 C 0.571753 0.615181 -0.364634 C -0.647188 0.038770 0.390740 C -1.945119 0.489521 -0.314753 C -3.232086 -0.192632 0.170258 C -4.472281 0.219319 -0.634765 H -4.592014 1.310887 -0.581403 C -5.758752 -0.459013 -0.152875 H -5.…	0	0	0	0	0	5	0	0	0	0	0	0	0	5	0	3	0	6	0
794	3757	CC[C@@H](C)CCC[C@H](CC)C(C)C	C13H28	41	-76.5349	C 3.354818 2.523007 0.231606 H 4.355930 2.079229 0.267909 H 3.044491 2.723509 1.264791 H 3.445448 3.488169 -0.280205 C 2.341569 1.619441 -0.482137 C 2.089557 0.253578 0.198281 C 0.793353 -0.398650 -0.338633 C -0.502339 0.212280 0.218553 C -1.764725 -0.447475 -0.355447 C -3.103246 0.176980 0.091718 C -4.266491 -0.428605 -0.722053 H -4.005438 -0.380265 -1.788499 C -5.626206 0.250603 -0.520015 H -5.…	0	0	0	0	0	5	0	0	0	0	0	0	0	5	0	3	0	6	0
795	3758	CC[C@@H](CCCCC(C)C)C(C)C	C13H28	41	-77.2519	C -3.528601 2.492570 -0.109887 H -4.518473 2.023452 -0.133954 H -3.262081 2.755134 -1.141379 H -3.625311 3.426879 0.455280 C -2.466380 1.581745 0.518261 C -2.205815 0.260099 -0.241658 C -0.872316 -0.381722 0.209691 C 0.382765 0.293443 -0.363989 C 1.690693 -0.347732 0.120640 C 2.942684 0.320588 -0.464610 C 4.282691 -0.345018 -0.091861 H 4.218937 -1.405571 -0.382262 C 4.570942 -0.286743 1.416221 H …	0	0	0	0	0	5	0	0	0	0	0	0	0	5	0	3	0	5	0
796	3759	CCCCCCC(CC)(CC)CC	C13H28	41	-76.8324	C -4.365359 -0.000030 0.608728 H -4.618324 -0.884226 0.013102 H -4.618353 0.884154 0.013097 H -5.023091 -0.000039 1.485742 C -2.896006 -0.000005 1.050574 C -1.816211 0.000004 -0.069664 C -0.436473 0.000013 0.649283 C 0.824797 0.000003 -0.227804 C 2.117833 0.000009 0.600811 C 3.392641 -0.000001 -0.252495 C 4.685355 0.000005 0.573679 H 4.691870 0.878016 1.235290 C 5.953206 -0.000006 -0.286569 H 5.9…	0	0	0	0	0	4	0	0	0	0	0	0	0	8	0	0	1	8	0
797	3760	CCCCC[C@@H](CC)C(CC)CC	C13H28	41	-73.8108	C -3.165302 -2.505098 -0.820697 H -4.079293 -2.358697 -0.234413 H -2.536191 -3.222196 -0.278567 H -3.457873 -2.971317 -1.768748 C -2.414448 -1.189759 -1.066257 C -1.930362 -0.476929 0.219022 C -0.772369 0.529513 -0.061007 C 0.528889 -0.210502 -0.488903 C 1.780215 0.202627 0.301913 C 3.051996 -0.531132 -0.141710 C 4.299687 -0.138189 0.660040 H 4.457678 0.946475 0.575101 C 5.565366 -0.874860 0.2096…	0	0	0	0	0	4	0	0	0	0	0	0	0	7	0	2	0	6	0
798	3761	CCCC[C@H](CC)CC(CC)CC	C13H28	41	-75.4156	C 3.782043 0.509588 -1.400147 H 4.175099 1.081586 -0.550347 H 3.031523 1.133744 -1.898259 H 4.605701 0.360020 -2.107865 C 3.205391 -0.833596 -0.938976 C 2.033676 -0.729893 0.064301 C 0.745787 -0.189346 -0.615462 C -0.105496 0.806779 0.209364 C -1.526799 0.943265 -0.382439 C -2.462473 -0.247199 -0.126664 C -3.857757 -0.062083 -0.738690 H -4.306888 0.860439 -0.343794 C -4.797305 -1.242292 -0.470785…	0	0	0	0	0	4	0	0	0	0	0	0	0	7	0	2	0	6	0
799	3762	CCC[C@@H](CC)CCC(CC)CC	C13H28	41	-74.7673	C 4.301955 1.385094 0.389857 H 5.054020 0.598705 0.260029 H 4.113667 1.487403 1.465853 H 4.747765 2.323637 0.040581 C 3.004106 1.078631 -0.367463 C 2.297142 -0.227223 0.061294 C 0.824559 -0.248049 -0.410284 C -0.119934 0.663610 0.389140 C -1.593839 0.634715 -0.078441 C -2.296818 -0.669010 0.363134 C -3.576425 -1.012291 -0.413224 H -4.297568 -0.187439 -0.340421 C -4.241647 -2.303910 0.074554 H -4.…	0	0	0	0	0	4	0	0	0	0	0	0	0	7	0	2	0	6	0
800	3763	CCC(CC)CCCC(CC)CC	C13H28	41	-75.4383	C 3.708866 2.295888 -0.249314 H 3.759460 2.448739 0.835950 H 2.785301 2.765816 -0.605852 H 4.546887 2.840001 -0.700134 C 3.772770 0.803582 -0.596745 C 2.631294 -0.049481 0.001142 C 1.294850 0.216833 -0.727679 C 0.036883 -0.214959 0.041531 C -1.258472 0.073860 -0.731176 C -2.555338 -0.449463 -0.075777 C -3.747938 -0.238704 -1.034490 H -3.887998 0.835567 -1.219284 C -5.074068 -0.852703 -0.570588 H …	0	0	0	0	0	4	0	0	0	0	0	0	0	7	0	2	0	6	0
801	3764	CCCCCC(CC)(CC)CCC	C13H28	41	-76.6186	C 4.540565 -0.000016 -1.370343 H 4.422285 0.884386 -2.008697 H 4.422285 -0.884433 -2.008676 H 5.568040 -0.000012 -0.988512 C 3.518323 -0.000003 -0.227102 C 2.071452 -0.000005 -0.743529 C 0.926251 0.000002 0.310231 C -0.407268 0.000004 -0.492100 C -1.720706 0.000008 0.304892 C -2.958833 -0.000002 -0.603514 C -4.285717 0.000007 0.166463 H -4.320868 -0.878005 0.827204 C -5.515331 -0.000007 -0.747657…	0	0	0	0	0	4	0	0	0	0	0	0	0	8	0	0	1	8	0
802	3765	CCCC[C@@H](CC)[C@@H](CC)CCC	C13H28	41	-74.6518	C -3.466972 -2.483163 -1.160955 H -2.920323 -2.708334 -2.085199 H -4.278710 -1.791683 -1.418802 H -3.923353 -3.415434 -0.808711 C -2.539498 -1.877980 -0.101712 C -1.866204 -0.578421 -0.568101 C -0.942353 0.076190 0.486763 C 0.129387 1.015900 -0.149201 C 1.294884 0.223044 -0.786758 C 2.279855 -0.398499 0.214198 C 3.417693 -1.176905 -0.459900 H 2.990302 -1.975572 -1.082959 C 4.409312 -1.784107 0.53…	0	0	0	0	0	4	0	0	0	0	0	0	0	7	0	2	0	6	0
803	3766	CCC[C@H](CC)C[C@@H](CC)CCC	C13H28	41	-75.5966	C -4.345287 1.054123 1.605396 H -4.157379 0.645923 2.606199 H -5.142440 0.453926 1.149305 H -4.725974 2.074615 1.728402 C -3.074051 1.029549 0.749816 C -2.521576 -0.387549 0.539790 C -1.224803 -0.464456 -0.296862 C 0.000000 0.000000 0.526178 C 1.224803 0.464456 -0.296862 C 2.521576 0.387548 0.539791 C 3.074050 -1.029550 0.749816 H 2.312759 -1.667493 1.218007 C 4.345286 -1.054125 1.605396 H 4.1573…	0	0	0	0	0	4	0	0	0	0	0	0	0	7	0	2	0	6	0
804	3767	CCCCC(CC)(CC)CCCC	C13H28	41	-76.5555	C -5.165175 -0.000018 -0.353928 H -5.310566 0.884609 0.278470 H -5.310562 -0.884622 0.278505 H -5.956196 -0.000035 -1.112703 C -3.773617 -0.000028 -0.994938 C -2.632939 -0.000005 0.033351 C -1.245829 -0.000017 -0.626631 C 0.000000 0.000009 0.306139 C 1.245829 -0.000010 -0.626631 C 2.632939 0.000004 0.033350 C 3.773617 -0.000019 -0.994940 H 3.671958 -0.877863 -1.648994 C 5.165175 -0.000007 -0.3539…	0	0	0	0	0	4	0	0	0	0	0	0	0	8	0	0	1	8	0
805	3768	CCCC[C@H](CC)CCC(C)(C)C	C13H28	41	-78.7368	C -4.093317 -0.496596 -1.086796 H -3.770826 -0.815865 -2.085722 H -4.391798 0.557156 -1.153278 H -4.983645 -1.079735 -0.820751 C -2.970253 -0.693621 -0.048615 C -1.756191 0.167477 -0.491510 C -0.490322 0.095061 0.377455 C 0.648113 1.032758 -0.091801 C 2.015818 0.567546 0.457273 C 2.604802 -0.670336 -0.234136 C 3.951635 -1.111017 0.354839 H 4.662981 -0.274627 0.298181 C 4.547154 -2.335581 -0.34747…	0	0	0	0	0	5	0	0	0	0	0	0	0	6	0	1	1	5	0
806	3769	CCCC[C@H](CC)C[C@@H](C)C(C)C	C13H28	41	-76.7221	C 4.426707 -0.327715 0.230681 H 4.515580 -0.970050 1.114910 H 4.550887 0.711827 0.558560 H 5.265529 -0.570620 -0.432579 C 3.085421 -0.532015 -0.491779 C 1.880787 0.000593 0.336627 C 0.577588 0.013829 -0.496503 C -0.508674 1.007619 -0.018448 C -1.905765 0.597057 -0.536056 C -2.538388 -0.599203 0.189047 C -3.910913 -0.993057 -0.373100 H -4.584429 -0.125331 -0.326084 C -4.549581 -2.174982 0.363514 H…	0	0	0	0	0	5	0	0	0	0	0	0	0	5	0	3	0	6	0
807	3770	CCCC[C@H](CC)[C@H](C)CC(C)C	C13H28	41	-76.5389	C -3.748073 -0.165957 1.403190 H -3.665748 0.906671 1.624894 H -3.022214 -0.692046 2.032859 H -4.749159 -0.490928 1.711081 C -3.519870 -0.433611 -0.092220 C -2.140172 0.062700 -0.577584 C -0.884916 -0.516035 0.119178 C 0.430981 0.076494 -0.481700 C 1.686134 -0.462699 0.248496 C 3.035969 0.036892 -0.289798 C 4.233286 -0.693608 0.334206 H 4.195003 -0.582661 1.427451 C 5.584929 -0.189890 -0.182196 H…	0	0	0	0	0	5	0	0	0	0	0	0	0	5	0	3	0	6	0
[truncated: 118 more rows]

## Sheet: Introduction
ID	ID in "currentDatabase.xlsx"	SMILES	Formula	Atoms Number	Calculated standard formation of enthalpy at M062X/def2TZVP//B3LYP/6-31G(d) level of theory (unit: kcal/mol)	Geometry	Group in conventional GA method
[truncated: 1 more rows]
