# Supplementary material for: An adaptive distance-based group contribution method for thermodynamic property prediction
Source: Royal Society of Chemistry journal article supplement (doi:10.1039/c6cp02929a), 2016-01-01
Supplement: c6cp02929a3.xlsx [file c6cp02929a3.xlsx]

## Sheet: speciesInfo
ID	SMILES	Formula	Atoms Number	SCF Energy in folder freq (unit: hartree)	ZPE (0 K) Energy in folder freq (unit: hartree)	Enthalpy (298.15 K) in folder freq (unit: hartree)	SP Energy in folder energy (unit: hartree)	SP Energy (0 K) in folder energy corrected with freq scaling factor (unit: hartree)	SP Enthalpy (298.15 K) in folder energy with ZPE and enthalpy correction (unit: hartree)	Calculated standard formation of enthalpy at M062X/def2TZVP//B3LYP/6-31G(d) level of theory (unit: kcal/mol)	Multiplicity (2*S+1)	Connectivity (.gjf format)	Geometry	Frequencies	Group contribution vectors
															1	2	3	4	5	6	7	8	9	10	11	12	13	14	15	16	17	18	19	20	21	22	23	24	25	26	27	28	29	30	31	32	33	34	35
															C/C/C1.5/H	C/C/C1.52	C/C/C2.0	C/C/C2.0/H	C/C/H2	C/C/H3	C/C1.5/H2	C/C1.52/H	C/C2.0/H	C/C2.0/H2	C/C2/C1.5	C/C2/C2.0	C/C2/H	C/C2/H2	C/C3	C/C3/H	C/C4	C/C/C1.5/H-C/C/C1.5/H	C/C/C1.5/H-C/C/C1.52	C/C/C1.5/H-C/C/C2.0	C/C/C1.5/H-C/C/C2.0/H	C/C/C1.5/H-C/C/H2	C/C/C1.5/H-C/C/H3	C/C/C1.5/H-C/C1.5/H2	C/C/C1.5/H-C/C1.52/H	C/C/C1.5/H-C/C2.0/H	C/C/C1.5/H-C/C2.0/H2	C/C/C1.5/H-C/C2/C1.5	C/C/C1.5/H-C/C2/C2.0	C/C/C1.5/H-C/C2/H	C/C/C1.5/H-C/C2/H2	C/C/C1.5/H-C/C3	C/C/C1.5/H-C/C3/H	C/C/C1.5/H-C/C4	C/C/C1.52-C/C/C1.52
1	C=CC	C3H6	9	-117.908	-117.827	-117.822	-117.884	-117.805	-117.8	4.99795	1	1 2 1.0 3 1.0 4 2.0 2 3 4 5 1.0 6 1.0 5 6 7 1.0 8 1.0 9 1.0 7 8 9	C 1.283098 0.220397 -0.000023 H 1.305685 1.308637 -0.000087 H 2.245287 -0.284804 0.000002 C 0.133802 -0.455505 0.000019 H 0.164049 -1.546256 0.000077 C -1.235039 0.162887 0.000004 H -1.181683 1.256795 -0.000123 H -1.812290 -0.150624 -0.880390 H -1.812212 -0.150419 0.880521	209.8436 424.5134 588.4204 932.8897 935.8264 956.0528 1034.7353 1081.6254 1203.3195 1338.7494 1435.6244 1473.4959 1509.9443 1523.9648 1738.5151 3032.0691 3078.7510 3116.1121 3144.3105 3156.0420 3234.1192	0	0	0	1	0	1	0	0	0	1	0	0	0	0	0	0	0	0	0	0	0	0	0	0	0	0	0	0	0	0	0	0	0	0	0
2	[CH2]=C[CH3]	C3H5	8	-117.228	-117.162	-117.157	-117.205	-117.141	-117.136	59.6249	2	1 2 1.0 3 1.0 4 2.0 2 3 4 5 1.0 5 6 1.0 7 1.0 8 1.0 6 7 8	C 1.347302 0.098384 -0.000030 H 1.545237 1.177478 -0.000139 H 2.227976 -0.542873 0.000018 C 0.125159 -0.381682 0.000036 C -1.274142 0.076583 0.000012 H -1.334278 1.178324 -0.000094 H -1.814439 -0.286406 -0.883508 H -1.814412 -0.286235 0.883618	187.2688 307.7662 478.5961 879.5744 908.8072 947.6813 1067.5897 1117.5285 1421.0624 1447.2394 1488.1865 1503.6308 1767.0050 2985.3546 3055.9323 3068.6819 3093.8448 3172.0157	0	0	1	0	0	1	0	0	0	1	0	0	0	0	0	0	0	0	0	0	0	0	0	0	0	0	0	0	0	0	0	0	0	0	0
3	[CH]=[CH][CH3]	C3H5	8	-117.22	-117.154	-117.149	-117.199	-117.135	-117.13	63.5267	2	1 2 1.0 3 2.0 2 3 4 1.0 5 1.0 4 5 6 1.0 7 1.0 8 1.0 6 7 8	C -1.315777 -0.321479 -0.000043 H -2.382110 -0.132278 -0.000039 C -0.213039 0.392146 0.000032 H -0.296192 1.488202 0.000127 C 1.193906 -0.153465 0.000000 H 1.194139 -1.246792 -0.000098 H 1.746820 0.193907 -0.882373 H 1.746798 0.193749 0.882451	201.5170 408.8988 613.5654 806.8655 813.6012 941.6693 1073.9050 1125.4826 1287.6704 1432.4744 1514.1414 1514.4928 1703.9888 3031.9289 3040.8885 3089.0361 3139.9640 3257.0148	0	0	0	1	0	1	0	0	1	0	0	0	0	0	0	0	0	0	0	0	0	0	0	0	0	0	0	0	0	0	0	0	0	0	0
4	[CH2]=[CH][CH2]	C3H5	8	-117.26	-117.194	-117.189	-117.235	-117.17	-117.165	41.0858	2	1 2 1.0 3 1.0 4 1.5 2 3 4 5 1.0 6 1.5 5 6 7 1.0 8 1.0 7 8	C -1.230042 -0.196026 -0.000001 H -1.299684 -1.280694 -0.000004 H -2.160957 0.361161 0.000007 C 0.000000 0.442976 0.000000 H -0.000001 1.533520 -0.000005 C 1.230041 -0.196025 0.000001 H 1.299688 -1.280693 -0.000002 H 2.160959 0.361158 -0.000001	426.5289 535.0003 553.4355 772.1225 796.7601 942.7763 1016.1122 1046.4028 1222.9470 1283.9668 1439.3771 1535.3584 1544.4674 3149.8047 3164.3737 3170.9360 3258.7196 3261.1770	0	0	0	0	0	0	2	1	0	0	0	0	0	0	0	0	0	0	0	0	0	0	0	0	0	0	0	0	0	0	0	0	0	0	0
5	CCC	C3H8	11	-119.144	-119.04	-119.035	-119.111	-119.01	-119.004	-25.5047	1	1 2 1.0 3 1.0 4 1.0 5 1.0 2 3 4 5 6 1.0 7 1.0 8 1.0 6 7 8 9 1.0 10 1.0 11 1.0 9 10 11	C 0.000000 1.277344 -0.259822 H -0.884612 1.322749 -0.907312 H 0.884612 1.322749 -0.907312 H 0.000000 2.175895 0.368011 C 0.000000 0.000000 0.586210 H 0.877623 0.000000 1.246919 H -0.877623 0.000000 1.246919 C 0.000000 -1.277344 -0.259822 H 0.000000 -2.175895 0.368011 H -0.884612 -1.322749 -0.907312 H 0.884612 -1.322749 -0.907312	225.3388 275.0114 367.2499 757.6983 880.3610 919.9132 941.0078 1067.4516 1190.2550 1229.1189 1331.6384 1386.6457 1433.5001 1449.7543 1520.0187 1520.6987 1528.3432 1537.9484 1544.2666 3033.3740 3037.5236 3041.6520 3058.4404 3098.7177 3108.3949 3109.5453 3110.7917	0	0	0	0	0	2	0	0	0	0	0	0	0	1	0	0	0	0	0	0	0	0	0	0	0	0	0	0	0	0	0	0	0	0	0
6	[CH2][CH2][CH3]	C3H7	10	-118.471	-118.383	-118.377	-118.441	-118.354	-118.349	23.4639	2	1 2 1.0 3 1.0 4 1.0 2 3 4 5 1.0 6 1.0 7 1.0 5 6 7 8 1.0 9 1.0 10 1.0 8 9 10	C 1.304650 -0.293954 -0.033477 H 1.301882 -1.311154 0.348788 H 2.261116 0.130256 -0.323300 C 0.080201 0.554066 0.054881 H 0.078351 1.118852 1.006954 H 0.104037 1.324881 -0.729177 C -1.228013 -0.244579 -0.040341 H -2.101373 0.409925 0.057690 H -1.300420 -0.766784 -1.000912 H -1.284623 -0.999169 0.753581	120.0424 251.7018 367.9022 464.6153 761.6888 889.6604 930.2272 1064.1802 1092.5778 1186.8350 1284.7004 1379.4945 1436.6790 1489.1172 1500.1920 1527.9061 1535.5736 2937.2257 3033.0551 3046.4793 3111.4173 3118.6318 3159.6880 3257.2173	0	0	0	0	1	1	0	0	0	0	0	0	0	1	0	0	0	0	0	0	0	0	0	0	0	0	0	0	0	0	0	0	0	0	0
7	[CH3][CH][CH3]	C3H7	10	-118.478	-118.39	-118.383	-118.446	-118.36	-118.354	20.2295	2	1 2 1.0 3 1.0 4 1.0 5 1.0 2 3 4 5 6 1.0 7 1.0 6 7 8 1.0 9 1.0 10 1.0 8 9 10	C 0.011628 -0.197397 1.301122 H 0.730677 -1.028942 1.296230 H -0.973285 -0.646160 1.529128 H 0.260540 0.460905 2.141307 C 0.011628 0.534302 0.000000 H -0.245161 1.591352 0.000000 C 0.011628 -0.197397 -1.301122 H 0.260540 0.460905 -2.141307 H 0.730677 -1.028942 -1.296230 H -0.973285 -0.646160 -1.529128	115.6230 126.7837 360.6623 412.6779 889.8712 949.4702 955.4208 1049.0185 1158.2217 1192.3254 1388.3925 1436.8529 1443.6233 1499.9396 1510.2771 1510.7205 1522.1967 2952.6729 2958.2120 3041.1511 3043.4400 3101.8388 3102.4753 3179.0155	0	0	0	0	0	2	0	0	0	0	0	0	1	0	0	0	0	0	0	0	0	0	0	0	0	0	0	0	0	0	0	0	0	0	0
8	C=CCC	C4H8	12	-157.221	-157.112	-157.106	-157.19	-157.084	-157.077	0.262118	1	1 2 1.0 3 1.0 4 2.0 2 3 4 5 1.0 6 1.0 5 6 7 1.0 8 1.0 9 1.0 7 8 9 10 1.0 11 1.0 12 1.0 10 11 12	C -1.862666 0.018201 -0.278243 H -1.962118 0.931741 -0.861770 H -2.741162 -0.619382 -0.223065 C -0.723117 -0.297160 0.338258 H -0.670515 -1.226351 0.909771 C 0.539904 0.520503 0.307726 H 0.799217 0.825762 1.332719 H 0.366257 1.444401 -0.258485 C 1.730173 -0.245873 -0.293971 H 1.529947 -0.525837 -1.334100 H 2.641139 0.362989 -0.273397 H 1.931470 -1.167346 0.265709	109.8250 235.1927 316.5738 433.1855 653.5618 802.7658 864.9732 937.6691 996.5672 1028.5949 1041.6643 1104.5357 1211.7656 1305.2876 1332.7498 1365.0233 1436.5567 1476.7365 1511.7875 1528.1821 1537.5835 1733.7884 3019.4433 3046.3989 3068.4935 3112.2417 3120.7964 3132.8104 3154.3039 3232.3321	0	0	0	1	0	1	0	0	0	1	0	0	0	1	0	0	0	0	0	0	0	0	0	0	0	0	0	0	0	0	0	0	0	0	0
9	[CH2]=[CH][CH2][CH2]	C4H7	11	-156.548	-156.454	-156.448	-156.52	-156.428	-156.421	49.456	2	1 2 1.0 3 1.0 4 2.0 2 3 4 5 1.0 6 1.0 5 6 7 1.0 8 1.0 9 1.0 7 8 9 10 1.0 11 1.0 10 11	C -1.799981 -0.049599 -0.263112 H -1.883517 0.642463 -1.099147 H -2.692483 -0.616573 -0.011894 C -0.662648 -0.190317 0.418130 H -0.617625 -0.900102 1.244966 C 0.619593 0.553024 0.127882 H 0.897043 1.163883 1.000306 H 0.432286 1.272757 -0.690134 C 1.757997 -0.354344 -0.220217 H 2.780563 -0.096698 0.036503 H 1.593968 -1.218314 -0.856697	101.6302 135.9927 322.9148 420.4139 471.0155 657.5059 803.3594 904.9432 940.1556 1033.4079 1056.0473 1082.8724 1126.1166 1254.0635 1330.3305 1353.5627 1469.0203 1483.6525 1492.0564 1728.9628 2955.3133 3027.5143 3147.2443 3157.1101 3166.6786 3233.9820 3268.3781	0	0	0	1	1	0	0	0	0	1	0	0	0	1	0	0	0	0	0	0	0	0	0	0	0	0	0	0	0	0	0	0	0	0	0
10	[CH2]=C[CH2][CH3]	C4H7	11	-156.542	-156.447	-156.441	-156.512	-156.419	-156.413	55.0155	2	1 2 1.0 3 1.0 4 2.0 2 3 4 5 1.0 5 6 1.0 7 1.0 8 1.0 6 7 8 9 1.0 10 1.0 11 1.0 9 10 11	C 1.939644 -0.181622 0.122503 H 2.232715 0.253568 1.086068 H 2.715751 -0.743475 -0.396152 C 0.730979 -0.028276 -0.368209 C -0.560378 0.603972 -0.033890 H -0.809901 1.354147 -0.797869 H -0.453173 1.159835 0.915506 C -1.718939 -0.402942 0.086604 H -1.516407 -1.137920 0.872488 H -2.653615 0.113349 0.330920 H -1.863203 -0.946299 -0.853013	109.2747 217.9215 286.0975 365.0626 555.1040 789.4937 840.8178 881.3338 969.7935 1028.5836 1100.5114 1139.8131 1287.5964 1351.6614 1435.4570 1445.7066 1488.9040 1525.9383 1535.1042 1760.2898 2960.7777 3041.3450 3055.4553 3056.5288 3126.7659 3130.7265 3170.6372	0	0	1	0	0	1	0	0	0	1	0	0	0	1	0	0	0	0	0	0	0	0	0	0	0	0	0	0	0	0	0	0	0	0	0
11	[CH]=[CH][CH2][CH3]	C4H7	11	-156.534	-156.439	-156.433	-156.506	-156.413	-156.407	58.6307	2	1 2 1.0 3 2.0 2 3 4 1.0 5 1.0 4 5 6 1.0 7 1.0 8 1.0 6 7 8 9 1.0 10 1.0 11 1.0 9 10 11	C -1.903549 -0.059349 -0.344958 H -2.898511 -0.485180 -0.304052 C -0.802680 -0.110214 0.369115 H -0.784861 -0.738449 1.272057 C 0.491041 0.611088 0.060205 H 0.728802 1.286854 0.894586 H 0.352638 1.238756 -0.826805 C 1.665785 -0.356404 -0.153346 H 1.479936 -1.014187 -1.009368 H 2.595744 0.192598 -0.339797 H 1.822676 -0.991113 0.727281	111.0265 236.5644 331.0698 420.1134 655.1918 782.6331 801.1890 827.6616 920.9911 1030.3785 1100.5813 1149.5857 1270.5171 1309.4711 1365.5174 1436.5080 1511.6246 1527.2296 1536.0022 1696.2428 3022.0161 3029.6903 3046.8615 3089.6108 3114.6582 3123.0114 3256.0686	0	0	0	1	0	1	0	0	1	0	0	0	0	1	0	0	0	0	0	0	0	0	0	0	0	0	0	0	0	0	0	0	0	0	0
12	C/C=C/C	C4H8	12	-157.227	-157.118	-157.112	-157.195	-157.089	-157.082	-2.76911	1	1 2 1.0 3 2.0 9 1.0 2 3 4 1.0 5 1.0 4 5 6 1.0 7 1.0 8 1.0 6 7 8 9 10 1.0 11 1.0 12 1.0 10 11 12	C 0.545104 -0.385656 -0.000001 H 1.526028 0.094463 -0.000001 C -0.545104 0.385656 -0.000001 H -1.526028 -0.094463 -0.000001 C -0.545104 1.887990 0.000001 H 0.474058 2.289791 -0.000002 H -1.066504 2.288139 0.880443 H -1.066510 2.288140 -0.880438 C 0.545104 -1.887990 0.000001 H -0.474058 -2.289791 -0.000002 H 1.066510 -2.288140 -0.880438 H 1.066504 -2.288139 0.880443	180.4419 233.7476 244.9534 281.9145 501.9034 755.7282 884.3384 998.7931 1011.3699 1076.2611 1083.0586 1086.3195 1179.4288 1345.5799 1346.2145 1441.8773 1443.7297 1510.0160 1510.2642 1519.8736 1527.6484 1764.1641 3028.1842 3028.9050 3073.3053 3073.5484 3110.0933 3112.0371 3131.1297 3138.8017	0	0	0	2	0	2	0	0	0	0	0	0	0	0	0	0	0	0	0	0	0	0	0	0	0	0	0	0	0	0	0	0	0	0	0
13	[CH2]=[CH][CH][CH3] or [CH3]/[CH]=[CH]/[CH2]	C4H7	11	-156.581	-156.486	-156.48	-156.547	-156.454	-156.448	32.8169	2	1 2 1.0 3 1.5 9 1.5 2 3 4 1.0 5 1.0 4 5 6 1.0 7 1.0 8 1.0 6 7 8 9 10 1.0 11 1.0 10 11	C 0.660173 0.381001 0.000003 H 0.507232 1.462000 0.000007 C -0.475982 -0.417718 0.000004 H -0.345129 -1.500135 0.000009 C -1.879155 0.099802 -0.000003 H -1.905971 1.195039 -0.000027 H -2.439955 -0.250477 0.879346 H -2.439958 -0.250517 -0.879333 C 1.966058 -0.081521 -0.000003 H 2.187459 -1.145609 -0.000006 H 2.809758 0.600320 -0.000002	152.8560 217.8669 286.8958 505.6703 546.0995 735.8855 776.9245 890.9915 1000.9587 1002.1365 1038.1737 1150.7546 1223.6359 1296.3942 1358.3218 1440.3911 1501.3123 1503.4769 1536.7247 1548.2732 3013.0741 3049.8119 3109.7771 3134.6674 3154.6311 3167.9056 3258.6702	1	0	0	0	0	1	1	1	0	0	0	0	0	0	0	0	0	0	0	0	0	0	0.0497871	0.00247875	0.0497871	0	0	0	0	0	0	0	0	0	0
14	[CH3]/[CH]=C/[CH3]	C4H7	11	-156.547	-156.452	-156.445	-156.516	-156.423	-156.416	52.6278	2	1 2 2.0 8 1.0 2 3 1.0 4 1.0 3 4 5 1.0 6 1.0 7 1.0 5 6 7 8 9 1.0 10 1.0 11 1.0 9 10 11	C -0.557335 -0.275402 0.000000 C 0.567953 0.406189 -0.000001 H 0.513835 1.505389 0.000000 C 1.958865 -0.178738 0.000000 H 1.927087 -1.272032 0.000001 H 2.524669 0.149285 0.882164 H 2.524669 0.149284 -0.882163 C -2.012893 -0.048775 0.000000 H -2.247308 1.029768 0.000000 H -2.491246 -0.490670 -0.883648 H -2.491246 -0.490669 0.883649	156.9492 195.1306 211.5306 248.2536 460.9968 735.9214 848.9928 998.6212 1056.1358 1072.5302 1079.2147 1127.4214 1310.5144 1426.8548 1433.0720 1487.9027 1506.7875 1514.4351 1519.7610 1789.9498 2981.4848 3015.2514 3034.6923 3063.5252 3081.0099 3087.8187 3133.2996	0	0	1	1	0	2	0	0	0	0	0	0	0	0	0	0	0	0	0	0	0	0	0	0	0	0	0	0	0	0	0	0	0	0	0
15	C=C(C)C	C4H8	12	-157.227	-157.119	-157.113	-157.196	-157.09	-157.084	-3.84776	1	1 2 2.0 7 1.0 8 1.0 2 3 1.0 9 1.0 3 4 1.0 5 1.0 6 1.0 4 5 6 7 8 9 10 1.0 11 1.0 12 1.0 10 11 12	C 0.000005 1.459576 -0.000036 C 0.000000 0.122946 0.000001 C -1.278060 -0.678945 0.000009 H -2.163236 -0.035555 -0.000049 H -1.332339 -1.334924 0.880047 H -1.332296 -1.335029 -0.879953 H 0.924687 2.031653 -0.000052 H -0.924672 2.031659 -0.000066 C 1.278054 -0.678954 0.000023 H 1.332315 -1.334947 0.880050 H 1.332305 -1.335021 -0.879950 H 2.163236 -0.035570 -0.000008	177.8194 213.0943 378.5653 437.4682 437.5660 710.0515 819.8923 920.9901 974.2592 995.5328 1036.1576 1099.2748 1121.9573 1310.7151 1439.0373 1441.8352 1470.6924 1501.3165 1515.5492 1518.2301 1532.5047 1743.3668 3025.2161 3031.4025 3070.9729 3074.4210 3124.7298 3126.3477 3156.3010 3232.0910	0	0	0	0	0	2	0	0	0	1	0	1	0	0	0	0	0	0	0	0	0	0	0	0	0	0	0	0	0	0	0	0	0	0	0
16	[CH]=C([CH3])[CH3]	C4H7	11	-156.539	-156.444	-156.438	-156.511	-156.418	-156.412	55.5523	2	1 2 2.0 7 1.0 2 3 1.0 8 1.0 3 4 1.0 5 1.0 6 1.0 4 5 6 7 8 9 1.0 10 1.0 11 1.0 9 10 11	C 0.323048 1.470181 -0.000053 C 0.016368 0.188877 -0.000004 C -1.416255 -0.300721 0.000011 H -2.125064 0.531198 -0.000020 H -1.613604 -0.924821 0.882232 H -1.613602 -0.924885 -0.882165 H 1.232080 2.060448 -0.000077 C 1.086560 -0.891481 0.000030 H 0.982990 -1.536365 0.883256 H 0.982985 -1.536427 -0.883150 H 2.095891 -0.470285 0.000013	172.2082 207.0135 360.1972 396.9424 426.3231 680.5097 800.2215 888.7486 969.2016 978.9253 1105.8586 1110.2047 1215.2983 1421.4250 1438.3477 1503.3843 1510.4923 1514.6160 1520.0567 1712.7661 3028.3773 3033.7033 3078.6658 3081.9507 3131.9428 3141.1662 3244.2795	0	0	0	0	0	2	0	0	1	0	0	1	0	0	0	0	0	0	0	0	0	0	0	0	0	0	0	0	0	0	0	0	0	0	0
17	[CH2]=C([CH2])[CH3] or [CH2]=C([CH3])[CH2]	C4H7	11	-156.577	-156.483	-156.477	-156.544	-156.452	-156.446	34.0448	2	1 2 1.5 7 1.0 8 1.0 2 3 1.0 9 1.5 3 4 1.0 5 1.0 6 1.0 4 5 6 7 8 9 10 1.0 11 1.0 10 11	C -0.772559 -1.212383 0.000912 C -0.092436 -0.000005 0.007013 C 1.426802 -0.000036 -0.001954 H 1.830382 -0.886261 0.498385 H 1.830414 0.885730 0.499176 H 1.811457 0.000424 -1.029701 H -1.857950 -1.246991 -0.020518 H -0.246234 -2.161795 0.015939 C -0.772489 1.212423 0.000912 H -1.857877 1.247098 -0.020520 H -0.246104 2.161803 0.015941	16.0745 407.6899 430.0661 481.6629 548.6113 555.4584 757.6484 790.2659 854.8774 981.9867 1037.7482 1058.4473 1072.3853 1351.3974 1390.6242 1444.0431 1509.6229 1523.6581 1526.2509 1557.7246 3048.5396 3107.3897 3128.9316 3163.2395 3170.7397 3254.6647 3256.7437	0	1	0	0	0	1	2	0	0	0	0	0	0	0	0	0	0	0	0	0	0	0	0	0	0	0	0	0	0	0	0	0	0	0	0
18	CCCC	C4H10	14	-158.458	-158.325	-158.319	-158.418	-158.288	-158.282	-30.6673	1	1 2 1.0 3 1.0 4 1.0 5 1.0 2 3 4 5 6 1.0 7 1.0 8 1.0 6 7 8 9 1.0 10 1.0 11 1.0 9 10 11 12 1.0 13 1.0 14 1.0 12 13 14	C 0.704505 1.835338 0.000000 H 0.190658 2.231621 0.884626 H 0.190658 2.231621 -0.884626 H 1.724309 2.236988 0.000000 C 0.704505 0.303360 0.000000 H 1.255244 -0.063623 -0.878056 H 1.255244 -0.063623 0.878056 C -0.704505 -0.303360 0.000000 H -1.255244 0.063623 -0.878056 H -1.255244 0.063623 0.878056 C -0.704505 -1.835338 0.000000 H -0.190658 -2.231621 0.884626 H -1.724309 -2.236988 0.000000 H -0.19…	120.8929 225.2840 258.7693 264.2643 424.4681 743.0804 818.8444 847.9658 972.0075 988.7735 1026.9310 1072.2592 1180.8601 1224.9353 1305.1549 1339.6327 1346.8665 1417.4958 1439.6249 1442.0824 1516.3688 1521.3749 1529.3993 1530.4177 1536.0312 1542.7621 3019.1307 3026.7404 3040.3823 3040.9861 3041.0619 3063.2470 3102.8356 3106.7941 3109.6423 3110.4174	0	0	0	0	0	2	0	0	0	0	0	0	0	2	0	0	0	0	0	0	0	0	0	0	0	0	0	0	0	0	0	0	0	0	0
19	[CH3][CH][CH2][CH3]	C4H9	13	-157.792	-157.674	-157.667	-157.753	-157.638	-157.631	15.2753	2	1 2 1.0 3 1.0 4 1.0 5 1.0 2 3 4 5 6 1.0 7 1.0 6 7 8 1.0 9 1.0 10 1.0 8 9 10 11 1.0 12 1.0 13 1.0 11 12 13	C 1.986752 -0.042638 -0.078936 H 2.068770 -0.831699 -0.839658 H 2.374728 -0.480386 0.859768 H 2.672323 0.766704 -0.355255 C 0.581487 0.441265 0.060721 H 0.415781 1.465630 0.391749 C -0.574250 -0.506554 0.106682 H -0.586658 -1.046595 1.074039 H -0.434226 -1.294227 -0.650429 C -1.936398 0.170769 -0.095458 H -1.988898 0.663432 -1.072962 H -2.755256 -0.554883 -0.036707 H -2.112104 0.934973 0.671396	62.8766 114.6179 239.3799 264.4013 413.1872 428.8728 776.6148 853.9105 986.5996 996.6487 1033.3764 1086.2088 1142.7737 1193.5995 1285.3301 1331.1234 1427.0553 1437.5817 1441.2506 1501.1256 1505.5734 1517.6097 1527.9865 1535.4790 2926.1729 2955.9644 3012.5868 3044.2212 3046.2217 3101.3228 3110.2787 3117.5115 3163.3104	0	0	0	0	0	2	0	0	0	0	0	0	1	1	0	0	0	0	0	0	0	0	0	0	0	0	0	0	0	0	0	0	0	0	0
20	[CH2][CH2][CH2][CH3]	C4H9	13	-157.785	-157.668	-157.661	-157.748	-157.633	-157.626	18.1953	2	1 2 1.0 3 1.0 4 1.0 2 3 4 5 1.0 6 1.0 7 1.0 5 6 7 8 1.0 9 1.0 10 1.0 8 9 10 11 1.0 12 1.0 13 1.0 11 12 13	C 1.998988 0.132381 -0.010703 H 2.170426 1.115062 0.420318 H 2.869072 -0.435687 -0.324789 C 0.644675 -0.490890 0.036461 H 0.550221 -1.243368 -0.760894 H 0.518727 -1.059350 0.979184 C -0.508999 0.521499 -0.070873 H -0.417513 1.069145 -1.018133 H -0.401758 1.270047 0.726797 C -1.891355 -0.131110 0.019742 H -2.019238 -0.659540 0.972704 H -2.690999 0.614241 -0.057757 H -2.038793 -0.861832 -0.785190	106.2779 134.9166 243.4429 262.7939 422.0705 467.6545 735.9170 827.5719 874.1338 973.0520 1040.1279 1085.4043 1100.5797 1181.4759 1263.6882 1327.5416 1338.8307 1410.0247 1440.5201 1487.6251 1498.9156 1521.6798 1529.1755 1538.2949 2926.3628 3024.3583 3034.1376 3041.0962 3066.9844 3105.6445 3111.8522 3160.2282 3257.5755	0	0	0	0	1	1	0	0	0	0	0	0	0	2	0	0	0	0	0	0	0	0	0	0	0	0	0	0	0	0	0	0	0	0	0
21	CC(C)C	C4H10	14	-158.459	-158.326	-158.32	-158.42	-158.291	-158.284	-32.2883	1	1 2 1.0 3 1.0 4 1.0 5 1.0 2 3 4 5 6 1.0 7 1.0 11 1.0 6 7 8 1.0 9 1.0 10 1.0 8 9 10 11 12 1.0 13 1.0 14 1.0 12 13 14	C -0.435141 1.395712 0.095871 H -0.452653 1.451638 1.192414 H -1.440607 1.643255 -0.265301 H 0.251581 2.170788 -0.265179 C 0.000000 0.000000 -0.372986 H 0.000006 0.000005 -1.473541 C -0.991158 -1.074698 0.095871 H -2.005741 -0.867509 -0.265213 H -0.702812 -2.069239 -0.265282 H -1.030861 -1.117806 1.192417 C 1.426301 -0.321015 0.095869 H 1.754214 -1.303216 -0.265295 H 2.143399 0.426043 -0.265184 H…	217.0891 260.1444 260.6271 364.6816 364.7754 431.8793 802.1511 934.0727 934.3940 966.8258 981.5729 981.5908 1205.0520 1205.1598 1225.0749 1377.2704 1377.3110 1429.1459 1429.2769 1457.1033 1513.1815 1519.3052 1519.3592 1537.6256 1537.6544 1544.3523 3012.0768 3032.6532 3032.6868 3040.5058 3095.4009 3095.4319 3103.7805 3105.0821 3108.0922 3108.1345	0	0	0	0	0	3	0	0	0	0	0	0	0	0	0	1	0	0	0	0	0	0	0	0	0	0	0	0	0	0	0	0	0	0	0
22	[CH3]C([CH3])[CH3]	C4H9	13	-157.798	-157.681	-157.674	-157.759	-157.644	-157.637	11.5325	2	1 2 1.0 3 1.0 4 1.0 5 1.0 2 3 4 5 6 1.0 10 1.0 6 7 1.0 8 1.0 9 1.0 7 8 9 10 11 1.0 12 1.0 13 1.0 11 12 13	C 1.208086 -0.870930 0.014602 H 1.457484 -1.050809 1.077985 H 2.098649 -0.417436 -0.439151 H 1.059379 -1.859126 -0.439275 C -0.000004 -0.000011 -0.143589 C 0.150213 1.481689 0.014602 H 1.080457 1.846950 -0.439139 H -0.687708 2.026230 -0.439287 H 0.181149 1.787618 1.077988 C -1.358299 -0.610756 0.014603 H -2.139747 0.012298 -0.439042 H -1.410974 -1.608643 -0.439380 H -1.638662 -0.737031 1.077989	129.1285 129.2283 136.8103 253.9691 379.5747 379.6562 762.4922 951.2383 951.3128 982.6241 1018.2443 1018.3335 1109.0639 1309.1944 1309.2534 1427.5080 1427.5293 1454.9758 1500.2079 1500.2739 1501.4719 1517.5338 1524.5038 1524.5293 2942.7535 2942.7560 2952.5033 3048.7446 3048.7936 3052.3563 3092.3357 3097.2812 3097.3279	0	0	0	0	0	3	0	0	0	0	0	0	0	0	1	0	0	0	0	0	0	0	0	0	0	0	0	0	0	0	0	0	0	0	0
23	[CH3][CH]([CH3])[CH2]	C4H9	13	-157.786	-157.668	-157.661	-157.75	-157.635	-157.628	17.0166	2	1 2 1.0 3 1.0 4 1.0 5 1.0 2 3 4 5 6 1.0 7 1.0 11 1.0 6 7 8 1.0 9 1.0 10 1.0 8 9 10 11 12 1.0 13 1.0 12 13	C -1.271461 -0.681056 0.102401 H -1.318088 -0.739433 1.196575 H -1.294073 -1.703314 -0.293010 H -2.174946 -0.165868 -0.244539 C 0.000000 0.059252 -0.350393 H 0.000000 0.048375 -1.458684 C 1.271461 -0.681056 0.102401 H 1.294074 -1.703313 -0.293010 H 2.174946 -0.165867 -0.244540 H 1.318089 -0.739432 1.196575 C 0.000000 1.484288 0.103973 H 0.929003 2.040144 0.195170 H -0.929003 2.040144 0.195167	120.5630 233.7986 259.3068 359.1779 371.8098 399.7904 515.3991 817.7776 913.1985 953.8502 976.0660 992.0287 1103.7836 1190.7230 1217.2045 1337.5151 1347.4706 1424.4978 1439.9153 1489.3721 1518.6538 1522.2251 1532.4735 1540.5476 2911.5734 3039.6161 3044.0069 3107.9467 3109.4098 3110.8074 3113.3469 3156.4245 3253.6166	0	0	0	0	1	2	0	0	0	0	0	0	0	0	0	1	0	0	0	0	0	0	0	0	0	0	0	0	0	0	0	0	0	0	0
24	C=CCCC	C5H10	15	-196.535	-196.397	-196.39	-196.497	-196.363	-196.355	-4.98851	1	1 2 1.0 3 1.0 4 2.0 2 3 4 5 1.0 6 1.0 5 6 7 1.0 8 1.0 9 1.0 7 8 9 10 1.0 11 1.0 12 1.0 10 11 12 13 1.0 14 1.0 15 1.0 13 14 15	C 2.485336 -0.215052 -0.304443 H 2.455315 -1.226463 -0.705775 H 3.429945 0.314682 -0.396239 C 1.419212 0.340370 0.272813 H 1.498131 1.358934 0.658649 C 0.074431 -0.314693 0.432522 H 0.118087 -1.346071 0.057381 H -0.174218 -0.382132 1.503439 C -1.056993 0.448441 -0.282733 H -1.079036 1.485536 0.080519 H -0.826155 0.505171 -1.354590 C -2.431768 -0.195435 -0.079253 H -2.698281 -0.234400 0.984256 H -…	97.0625 104.5254 231.3263 250.2650 383.0862 435.7650 643.9106 755.9024 883.5825 895.5980 937.6279 959.4669 1032.1975 1042.6323 1060.3360 1123.8425 1209.1628 1280.9233 1312.2482 1335.9466 1345.9301 1402.0713 1440.3345 1475.7226 1510.5806 1523.1055 1529.2305 1539.2713 1733.2709 3008.2338 3032.8568 3041.3998 3054.7836 3073.6607 3107.1677 3112.2851 3133.2537 3154.2607 3232.1744	0	0	0	1	0	1	0	0	0	1	0	0	0	2	0	0	0	0	0	0	0	0	0	0	0	0	0	0	0	0	0	0	0	0	0
25	[CH]=[CH][CH2][CH2][CH3]	C5H9	14	-195.848	-195.724	-195.717	-195.813	-195.692	-195.685	53.3884	2	1 2 1.0 3 2.0 2 3 4 1.0 5 1.0 4 5 6 1.0 7 1.0 8 1.0 6 7 8 9 1.0 10 1.0 11 1.0 9 10 11 12 1.0 13 1.0 14 1.0 12 13 14	C 2.528806 -0.125253 -0.425701 H 3.553112 0.209696 -0.533494 C 1.493638 0.166176 0.328038 H 1.593836 0.962372 1.080463 C 0.129822 -0.483382 0.253322 H 0.152437 -1.294997 -0.483356 H -0.101257 -0.943391 1.226244 C -0.986310 0.515850 -0.101337 H -0.977394 1.341455 0.624263 H -0.764797 0.964592 -1.078349 C -2.374789 -0.130388 -0.126916 H -2.631145 -0.559798 0.849521 H -3.149543 0.601048 -0.383214 H …	97.1636 106.8563 238.0161 253.0521 387.9376 420.5323 648.9046 753.7407 805.1435 817.5813 892.2426 914.1540 1013.1582 1056.6518 1122.2069 1152.6861 1256.4881 1290.8047 1326.5471 1339.3213 1402.0123 1440.4758 1509.1416 1522.9070 1529.1785 1539.0934 1695.7942 3016.2831 3024.3737 3032.9502 3042.1103 3065.1073 3088.1344 3108.7609 3112.9171 3255.6047	0	0	0	1	0	1	0	0	1	0	0	0	0	2	0	0	0	0	0	0	0	0	0	0	0	0	0	0	0	0	0	0	0	0	0
26	[CH2]=[CH][CH2][CH2][CH2]	C5H9	14	-195.862	-195.74	-195.732	-195.827	-195.707	-195.7	43.9799	2	1 2 1.0 3 1.0 4 2.0 2 3 4 5 1.0 6 1.0 5 6 7 1.0 8 1.0 9 1.0 7 8 9 10 1.0 11 1.0 12 1.0 10 11 12 13 1.0 14 1.0 13 14	C 2.421929 -0.101559 -0.348322 H 2.408472 -0.944089 -1.037332 H 3.359334 0.442263 -0.265899 C 1.344949 0.240037 0.359981 H 1.406298 1.095183 1.036452 C 0.010982 -0.451668 0.301284 H 0.065186 -1.314304 -0.374065 H -0.242421 -0.846735 1.297324 C -1.132205 0.486138 -0.150465 H -1.131513 1.373611 0.511978 H -0.907747 0.877200 -1.152246 C -2.472544 -0.166897 -0.137955 H -2.729570 -0.886613 0.634535 H …	96.0010 103.1718 127.0918 238.5136 385.7670 425.3138 472.7890 643.7792 752.1859 882.0691 939.4716 945.1225 985.7169 1037.4299 1078.6904 1095.7951 1140.3149 1238.6861 1300.8305 1322.1295 1339.5857 1391.1596 1474.9190 1486.2475 1499.6322 1517.5289 1733.3010 2932.5506 3013.4833 3050.4223 3079.1916 3133.0789 3155.0229 3161.7155 3233.1202 3260.2445	0	0	0	1	1	0	0	0	0	1	0	0	0	2	0	0	0	0	0	0	0	0	0	0	0	0	0	0	0	0	0	0	0	0	0
27	[CH2]=C[CH2][CH2][CH3]	C5H9	14	-195.856	-195.732	-195.725	-195.819	-195.698	-195.69	49.6897	2	1 2 1.0 3 1.0 4 2.0 2 3 4 5 1.0 5 6 1.0 7 1.0 8 1.0 6 7 8 9 1.0 10 1.0 11 1.0 9 10 11 12 1.0 13 1.0 14 1.0 12 13 14	C 2.602879 0.086678 -0.225866 H 2.802299 -0.477942 -1.145221 H 3.443413 0.657061 0.168154 C 1.426180 0.068218 0.357435 C 0.081472 -0.515116 0.189022 H 0.085591 -1.187889 -0.689186 H -0.157083 -1.150011 1.055512 C -1.031125 0.540129 0.018033 H -1.024456 1.207564 0.888897 H -0.795792 1.165674 -0.852161 C -2.416897 -0.089240 -0.147704 H -2.684236 -0.697925 0.724947 H -3.188624 0.679373 -0.266466 H -…	91.8519 103.8650 226.8078 247.3390 339.6250 380.8540 543.1348 750.1013 864.3553 880.4335 885.1417 943.3088 1012.0478 1054.8760 1120.3979 1148.4319 1265.6879 1308.8166 1334.4698 1396.2123 1441.0071 1445.1026 1486.8947 1522.2973 1528.9772 1537.9417 1760.0032 2950.9151 3029.9722 3042.2928 3049.2751 3055.1656 3080.5183 3109.7427 3115.3331 3170.0941	0	0	1	0	0	1	0	0	0	1	0	0	0	2	0	0	0	0	0	0	0	0	0	0	0	0	0	0	0	0	0	0	0	0	0
28	[CH2]=[CH][CH2][CH][CH3]	C5H9	14	-195.868	-195.746	-195.738	-195.832	-195.712	-195.704	41.2198	2	1 2 1.0 3 1.0 4 2.0 2 3 4 5 1.0 6 1.0 5 6 7 1.0 8 1.0 9 1.0 7 8 9 10 1.0 11 1.0 10 11 12 1.0 13 1.0 14 1.0 12 13 14	C 2.493876 0.010699 -0.274867 H 2.557471 -0.725586 -1.074090 H 3.400229 0.569676 -0.057396 C 1.363557 0.212021 0.402778 H 1.340220 0.964791 1.191873 C 0.064034 -0.514722 0.159531 H 0.224783 -1.280837 -0.622649 H -0.217207 -1.078032 1.064748 C -1.065934 0.398953 -0.214106 H -0.838448 1.244634 -0.859886 C -2.492077 0.001323 -0.025174 H -2.651062 -0.485818 0.946934 H -3.166396 0.863108 -0.087849 H -…	55.5873 93.3963 111.9350 258.0036 381.4451 425.1539 443.2736 642.9466 874.2942 905.3559 939.9544 960.0196 1000.1581 1037.1178 1110.8286 1125.2410 1154.5668 1249.3010 1306.0250 1336.9641 1412.8669 1438.3086 1470.2846 1492.0680 1504.3150 1516.1728 1730.6085 2942.3647 2958.1779 3002.4475 3046.6236 3102.9699 3145.3816 3156.2199 3177.2400 3233.2369	0	0	0	1	0	1	0	0	0	1	0	0	1	1	0	0	0	0	0	0	0	0	0	0	0	0	0	0	0	0	0	0	0	0	0
29	C/C=C/CC	C5H10	15	-196.54	-196.403	-196.395	-196.501	-196.367	-196.359	-7.55112	1	1 2 2.0 11 1.0 12 1.0 2 3 1.0 4 1.0 3 4 5 1.0 6 1.0 7 1.0 5 6 7 8 1.0 9 1.0 10 1.0 8 9 10 11 12 13 1.0 14 1.0 15 1.0 13 14 15	C -1.172199 0.337308 0.238593 C -0.065386 -0.038277 -0.407828 H -0.130699 -0.855657 -1.130626 C 1.302018 0.561338 -0.218360 H 1.650734 0.986515 -1.171806 H 1.242622 1.397469 0.490333 C 2.340880 -0.462096 0.271416 H 2.056714 -0.871677 1.247166 H 2.428836 -1.302076 -0.428358 H 3.331719 -0.003528 0.368602 H -1.104112 1.151958 0.962853 C -2.534347 -0.269217 0.054417 H -2.517915 -1.077311 -0.685013 H …	94.5229 173.9807 211.1012 214.6991 306.6269 408.8874 489.4943 768.8752 814.1656 892.2180 959.8958 1013.1625 1038.8321 1078.6121 1090.9978 1112.2553 1190.8560 1290.1280 1334.1736 1349.2159 1387.2819 1435.9209 1442.9219 1510.0868 1511.3271 1523.4196 1527.9506 1537.0998 1759.5699 3016.0433 3028.6079 3044.8902 3064.6282 3073.5671 3110.1202 3111.6047 3118.4312 3122.2747 3135.4842	0	0	0	2	0	2	0	0	0	0	0	0	0	1	0	0	0	0	0	0	0	0	0	0	0	0	0	0	0	0	0	0	0	0	0
30	[CH3]/[CH]=[CH]/[CH][CH3]	C5H9	14	-195.9	-195.777	-195.77	-195.858	-195.738	-195.73	24.8852	2	1 2 1.5 10 1.0 11 1.0 2 3 1.0 4 1.5 3 4 5 1.0 6 1.0 5 6 7 1.0 8 1.0 9 1.0 7 8 9 10 11 12 1.0 13 1.0 14 1.0 12 13 14	C -1.234816 -0.441305 0.000000 C -0.000001 0.192660 0.000001 H -0.000001 1.285587 0.000002 C 1.234815 -0.441303 0.000001 H 1.257036 -1.531345 0.000002 C 2.552639 0.267037 -0.000001 H 2.425520 1.355361 -0.000005 H 3.157938 0.000409 0.879415 H 3.157939 0.000400 -0.879412 H -1.257034 -1.531347 -0.000001 C -2.552638 0.267037 0.000000 H -2.425517 1.355361 -0.000008 H -3.157942 0.000401 -0.879410 H -3.…	127.6605 142.7293 191.4521 221.2825 233.8464 444.9798 475.4450 723.1733 754.9824 914.9603 962.1465 986.6483 1037.9585 1038.7247 1080.2557 1165.5704 1222.5867 1306.8285 1311.4813 1437.5184 1438.2997 1462.3619 1503.7047 1504.3263 1514.2646 1537.4770 1557.4163 3009.8180 3011.0681 3045.9585 3046.1369 3107.1846 3107.1884 3121.8673 3149.2323 3156.8264	2	0	0	0	0	2	0	1	0	0	0	0	0	0	0	0	0	0.00247875	0	0	0	0	0.099821	0	0.0995741	0	0	0	0	0	0	0	0	0	0
31	[CH3]/C=[CH]/[CH2][CH3]	C5H9	14	-195.86	-195.737	-195.729	-195.822	-195.701	-195.694	47.6963	2	1 2 2.0 11 1.0 2 3 1.0 4 1.0 3 4 5 1.0 6 1.0 7 1.0 5 6 7 8 1.0 9 1.0 10 1.0 8 9 10 11 12 1.0 13 1.0 14 1.0 12 13 14	C 1.192549 0.162571 -0.240420 C 0.062985 0.131571 0.432887 H 0.065984 -0.293281 1.449102 C -1.282538 0.612313 -0.063555 H -1.648987 1.407486 0.602474 H -1.162246 1.062434 -1.055359 C -2.328139 -0.512818 -0.119594 H -2.018276 -1.299726 -0.816133 H -2.465362 -0.975650 0.865361 H -3.301536 -0.129845 -0.447434 C 2.611189 -0.203408 -0.087438 H 2.801612 -0.653578 0.902117 H 2.925363 -0.930602 -0.847301…	84.9257 149.3034 181.3036 231.1924 267.9681 377.9276 447.2842 755.9473 801.9978 870.1614 963.4384 1021.8123 1060.9186 1072.7576 1106.7036 1149.6698 1278.8134 1319.9818 1371.5170 1426.8210 1435.4988 1487.9866 1506.6048 1511.5217 1527.0165 1536.0563 1784.9642 2981.5584 3005.6323 3023.6204 3044.6404 3063.6687 3084.1709 3088.0046 3111.4249 3119.8852	0	0	1	1	0	2	0	0	0	0	0	0	0	1	0	0	0	0	0	0	0	0	0	0	0	0	0	0	0	0	0	0	0	0	0
32	[CH3]/[CH]=C/[CH2][CH3]	C5H9	14	-195.86	-195.737	-195.729	-195.822	-195.701	-195.693	47.981	2	1 2 2.0 10 1.0 11 1.0 2 3 1.0 3 4 1.0 5 1.0 6 1.0 4 5 6 7 1.0 8 1.0 9 1.0 7 8 9 10 11 12 1.0 13 1.0 14 1.0 12 13 14	C -1.226935 0.318244 0.292529 C -0.061612 0.125990 -0.288088 C 1.341163 0.575034 -0.181729 H 1.646334 1.063396 -1.118555 H 1.408985 1.353094 0.600911 C 2.327084 -0.562903 0.140075 H 2.076504 -1.037130 1.094752 H 2.298378 -1.334978 -0.636007 H 3.351667 -0.180180 0.204194 H -1.282251 1.026547 1.133035 C -2.527439 -0.346613 -0.086152 H -2.389507 -1.033969 -0.925692 H -2.941045 -0.913277 0.758697 H -…	93.5171 138.1160 178.0068 200.9413 275.4332 429.2233 461.1504 742.6929 790.0456 839.0738 960.5849 1042.5759 1067.4081 1080.8590 1106.6482 1138.9708 1269.2361 1318.9794 1364.1704 1432.0058 1435.8674 1488.3863 1514.2278 1519.1365 1525.7885 1535.0300 1783.4963 2957.1611 3015.0541 3034.5752 3036.3987 3054.5762 3081.0311 3124.2200 3128.8091 3133.2499	0	0	1	1	0	2	0	0	0	0	0	0	0	1	0	0	0	0	0	0	0	0	0	0	0	0	0	0	0	0	0	0	0	0	0
33	[CH3]/[CH]=[CH]/[CH2][CH2]	C5H9	14	-195.867	-195.745	-195.737	-195.831	-195.711	-195.703	41.582	2	1 2 2.0 10 1.0 11 1.0 2 3 1.0 4 1.0 3 4 5 1.0 6 1.0 7 1.0 5 6 7 8 1.0 9 1.0 8 9 10 11 12 1.0 13 1.0 14 1.0 12 13 14	C 1.102949 0.298258 -0.276788 C 0.000352 -0.014302 0.408858 H 0.068580 -0.732584 1.227956 C -1.378391 0.536861 0.133731 H -1.739204 1.092952 1.012730 H -1.304354 1.285809 -0.676585 C -2.376940 -0.520551 -0.220516 H -2.090419 -1.352907 -0.855898 H -3.427258 -0.408088 0.029646 H 1.023254 1.012169 -1.099468 C 2.475088 -0.252518 -0.011464 H 2.469916 -0.959242 0.825388 H 2.873240 -0.773586 -0.892923 H…	92.5304 132.9182 178.5593 215.2863 275.0100 405.0738 463.9846 499.0439 768.6049 811.7827 944.1183 999.5079 1013.4998 1078.0335 1084.5678 1103.4543 1130.2264 1226.0973 1331.2004 1347.1818 1369.0079 1442.4275 1483.1882 1488.3834 1510.1155 1522.7254 1755.0375 2950.5471 3021.2163 3029.5285 3074.7756 3112.7001 3133.2769 3140.8567 3164.7268 3266.3045	0	0	0	2	1	1	0	0	0	0	0	0	0	1	0	0	0	0	0	0	0	0	0	0	0	0	0	0	0	0	0	0	0	0	0
34	[CH2]=[CH][CH][CH2][CH3] or [CH2]/[CH]=[CH]/[CH2][CH3]	C5H9	14	-195.894	-195.77	-195.763	-195.853	-195.732	-195.725	28.1079	2	1 2 1.5 11 1.0 12 1.5 2 3 1.0 4 1.0 3 4 5 1.0 6 1.0 7 1.0 5 6 7 8 1.0 9 1.0 10 1.0 8 9 10 11 12 13 1.0 14 1.0 13 14	C -1.295164 0.348304 0.167336 C -0.130819 -0.159672 -0.393857 H -0.183549 -1.116175 -0.916565 C 1.212320 0.501342 -0.326806 H 1.562574 0.731680 -1.346013 H 1.126348 1.464118 0.193496 C 2.280442 -0.367870 0.364891 H 2.004077 -0.575702 1.404352 H 2.397533 -1.330083 -0.147615 H 3.255086 0.133684 0.363056 H -1.218779 1.304055 0.689583 C -2.541030 -0.255897 0.116756 H -2.686366 -1.207221 -0.388360 H -…	74.7922 168.2410 211.8878 303.0516 393.2204 490.7998 548.0302 749.3417 776.9522 798.2610 888.5196 983.9758 1002.9982 1034.8290 1078.5797 1171.1663 1223.1470 1278.4163 1301.9028 1334.7219 1394.2632 1433.6558 1507.6483 1520.3650 1527.5690 1536.7228 1543.4626 2998.4240 3046.3658 3062.8592 3113.0712 3121.0720 3133.1888 3144.3058 3167.5905 3258.4445	1	0	0	0	0	1	1	1	0	0	0	0	0	1	0	0	0	0	0	0	0	0	0.00247875	0.00247875	0.0497871	0	0	0	0	0	0.0497871	0	0	0	0
35	C=CC(C)C	C5H10	15	-196.535	-196.398	-196.391	-196.499	-196.365	-196.357	-6.2272	1	1 2 2.0 10 1.0 11 1.0 2 3 1.0 4 1.0 3 4 5 1.0 6 1.0 12 1.0 5 6 7 1.0 8 1.0 9 1.0 7 8 9 10 11 12 13 1.0 14 1.0 15 1.0 13 14 15	C -2.153504 -0.000002 -0.162464 C -0.952072 -0.000054 0.415600 H -0.887137 -0.000140 1.506586 C 0.371532 0.000011 -0.308715 H 0.167606 0.000058 -1.388840 C 1.178584 1.268047 0.028255 H 0.627108 2.173428 -0.247319 H 1.394636 1.321189 1.103141 H 2.137257 1.274670 -0.504258 H -2.266542 0.000086 -1.245166 H -3.071286 -0.000041 0.419878 C 1.178647 -1.268014 0.028135 H 1.394709 -1.321241 1.103014 H 0.6…	98.0895 229.1759 244.7546 311.0492 321.6482 346.1109 504.1518 694.8024 806.7775 936.0977 940.0555 941.5824 972.4981 1012.8332 1039.4542 1128.0718 1197.8174 1229.5118 1329.7998 1353.8198 1357.3617 1423.6786 1443.4069 1479.5987 1518.7838 1520.0490 1531.5804 1540.3091 1731.0005 3029.1702 3037.5412 3042.0594 3099.9251 3106.1855 3118.2596 3119.4880 3124.4727 3153.4731 3231.1165	0	0	0	1	0	2	0	0	0	1	0	0	0	0	0	1	0	0	0	0	0	0	0	0	0	0	0	0	0	0	0	0	0	0	0
36	[CH2]=[CH][C@@H]([CH3])[CH2]	C5H9	14	-195.863	-195.74	-195.732	-195.828	-195.709	-195.701	43.2372	2	1 2 2.0 10 1.0 11 1.0 2 3 1.0 4 1.0 3 4 5 1.0 6 1.0 12 1.0 5 6 7 1.0 8 1.0 9 1.0 7 8 9 10 11 12 13 1.0 14 1.0 13 14	C -2.111555 0.094341 -0.137388 C -0.903907 0.069497 0.429135 H -0.816895 0.123804 1.515639 C 0.412748 -0.057770 -0.318507 H 0.179124 -0.048710 -1.393658 C 1.343274 1.128535 -0.006182 H 0.873321 2.079203 -0.279761 H 1.580314 1.166189 1.064669 H 2.287259 1.036054 -0.554849 H -2.238117 0.037067 -1.216951 H -3.020132 0.174735 0.453709 C 1.050755 -1.372101 0.024105 H 0.652169 -2.295761 -0.384330 H 1.7…	104.0547 140.0481 236.1180 295.6331 324.7804 333.7443 489.1702 538.6057 694.2424 819.2134 916.1220 931.2564 949.0393 999.6985 1034.3943 1101.2057 1181.8666 1193.4768 1308.2681 1332.7299 1356.1736 1430.0995 1468.4896 1483.5877 1525.5520 1528.2479 1713.3820 3014.8990 3043.8049 3109.1984 3124.2433 3140.0689 3155.0768 3157.2958 3232.1299 3258.8439	0	0	0	1	1	1	0	0	0	1	0	0	0	0	0	1	0	0	0	0	0	0	0	0	0	0	0	0	0	0	0	0	0	0	0
37	[CH]=[CH][CH]([CH3])[CH3]	C5H9	14	-195.849	-195.725	-195.718	-195.815	-195.694	-195.687	52.0034	2	1 2 2.0 10 1.0 2 3 1.0 4 1.0 3 4 5 1.0 6 1.0 11 1.0 5 6 7 1.0 8 1.0 9 1.0 7 8 9 10 11 12 1.0 13 1.0 14 1.0 12 13 14	C -2.191039 0.000000 -0.252773 C -1.025164 0.000000 0.350132 H -0.991508 -0.000001 1.450495 C 0.332464 0.000000 -0.329160 H 0.163543 0.000000 -1.413196 C 1.119411 1.269688 0.041161 H 0.577225 2.172712 -0.258898 H 1.290324 1.324277 1.124120 H 2.099151 1.277988 -0.451398 H -3.235946 0.000000 0.031934 C 1.119412 -1.269688 0.041161 H 1.290325 -1.324277 1.124120 H 0.577226 -2.172712 -0.258898 H 2.0991…	100.0393 231.1495 246.0417 319.5128 334.4421 345.9592 494.5271 677.0059 755.4146 833.3944 885.4304 941.8559 952.4261 972.7525 1129.1336 1168.1329 1197.4234 1268.0256 1360.5564 1362.1578 1423.7824 1443.6525 1518.6520 1519.3350 1530.4959 1538.9646 1691.6379 3014.6177 3037.7954 3042.0304 3053.1466 3100.0957 3107.8747 3120.1121 3121.5744 3255.9959	0	0	0	1	0	2	0	0	1	0	0	0	0	0	0	1	0	0	0	0	0	0	0	0	0	0	0	0	0	0	0	0	0	0	0
38	[CH2]=C[CH]([CH3])[CH3]	C5H9	14	-195.856	-195.733	-195.725	-195.82	-195.7	-195.692	48.6954	2	1 2 2.0 9 1.0 10 1.0 2 3 1.0 3 4 1.0 5 1.0 11 1.0 4 5 6 1.0 7 1.0 8 1.0 6 7 8 9 10 11 12 1.0 13 1.0 14 1.0 12 13 14	C 2.233168 0.000000 0.023834 C 0.963847 0.000000 -0.313837 C -0.382171 0.000000 0.302983 H -0.238188 0.000000 1.400377 C -1.168806 1.272515 -0.070248 H -0.624600 2.174842 0.226739 H -1.337371 1.319797 -1.152126 H -2.145242 1.278169 0.427742 H 2.553534 0.000000 1.073153 H 3.035696 -0.000001 -0.713143 C -1.168807 -1.272515 -0.070248 H -1.337372 -1.319797 -1.152126 H -0.624602 -2.174842 0.226739 H -…	98.8897 216.6662 225.0393 277.9385 312.1410 341.4795 477.7230 592.8212 773.7894 880.8450 932.3557 940.2208 974.0271 981.0371 1125.1221 1157.4125 1202.7073 1327.3113 1331.0504 1422.3975 1441.4767 1448.0149 1517.0683 1520.1064 1529.2227 1539.3868 1756.0999 2936.3027 3047.7362 3051.5645 3055.5963 3115.3464 3119.9029 3126.7798 3127.9223 3169.5563	0	0	1	0	0	2	0	0	0	1	0	0	0	0	0	1	0	0	0	0	0	0	0	0	0	0	0	0	0	0	0	0	0	0	0
39	CCC(=C)C	C5H10	15	-196.54	-196.402	-196.395	-196.503	-196.369	-196.361	-8.73219	1	1 2 2.0 9 1.0 10 1.0 2 3 1.0 12 1.0 3 4 1.0 5 1.0 11 1.0 4 5 6 1.0 7 1.0 8 1.0 6 7 8 9 10 11 12 13 1.0 14 1.0 15 1.0 13 14 15	C 0.504528 1.456174 -0.000035 C 0.540965 0.119819 -0.000013 C -0.696221 -0.755703 0.000002 H -0.641284 -1.426783 0.871627 C -2.046863 -0.037354 0.000032 H -2.162538 0.597496 0.885586 H -2.162576 0.597500 -0.885514 H -2.866845 -0.763630 0.000047 H -0.426256 2.014883 -0.000039 H 1.418358 2.045218 -0.000050 H -0.641314 -1.426766 -0.871637 C 1.849631 -0.634055 0.000004 H 1.930520 -1.287101 0.880164 H…	95.0408 185.5199 268.2139 275.4300 398.4066 438.6333 494.8146 691.3961 785.9681 817.2044 920.4535 958.7111 1018.8036 1034.8310 1060.7120 1112.7135 1140.0305 1269.3945 1312.9816 1407.6116 1433.9907 1442.4399 1473.9885 1505.3897 1510.4348 1525.8984 1528.9568 1540.9356 1738.9556 3005.9571 3025.6539 3028.6989 3052.0243 3072.7837 3119.2209 3119.4361 3124.9427 3166.0365 3242.1883	0	0	0	0	0	2	0	0	0	1	0	1	0	1	0	0	0	0	0	0	0	0	0	0	0	0	0	0	0	0	0	0	0	0	0
40	[CH3][CH2]C(=[CH2])[CH2]	C5H9	14	-195.889	-195.766	-195.758	-195.851	-195.73	-195.723	29.5594	2	1 2 1.5 9 1.0 10 1.0 2 3 1.0 12 1.5 3 4 1.0 5 1.0 11 1.0 4 5 6 1.0 7 1.0 8 1.0 6 7 8 9 10 11 12 13 1.0 14 1.0 13 14	C 0.635597 1.410350 -0.000001 C 0.621539 0.026094 -0.000001 C -0.686339 -0.764856 -0.000005 H -0.682617 -1.430992 0.873691 C -1.981297 0.050402 0.000004 H -2.055661 0.691333 0.885856 H -2.055667 0.691343 -0.885840 H -2.849325 -0.617699 0.000002 H -0.270677 2.004244 -0.000004 H 1.577073 1.952141 0.000001 H -0.682620 -1.430979 -0.873711 C 1.814284 -0.700764 0.000003 H 2.777765 -0.199831 0.000003 H …	23.7064 275.3343 285.3592 415.8368 474.8408 488.8783 525.1524 571.7000 743.2792 787.6651 788.2759 811.4640 992.7503 1023.0444 1054.0650 1091.9155 1119.0726 1294.6757 1315.6920 1394.0324 1411.5541 1442.5222 1510.9574 1513.6983 1530.1595 1538.7323 1562.1969 3032.0506 3050.6034 3058.1457 3117.7459 3118.6124 3163.9564 3177.5449 3253.8649 3267.6059	0	1	0	0	0	1	2	0	0	0	0	0	0	1	0	0	0	0	0	0	0	0	0	0	0	0	0	0	0	0	0	0	0	0	0
41	[CH3][CH2]C(=[CH])[CH3]	C5H9	14	-195.853	-195.729	-195.721	-195.819	-195.698	-195.69	49.8723	2	1 2 2.0 9 1.0 2 3 1.0 11 1.0 3 4 1.0 5 1.0 10 1.0 4 5 6 1.0 7 1.0 8 1.0 6 7 8 9 10 11 12 1.0 13 1.0 14 1.0 12 13 14	C 0.480275 1.475062 -0.000032 C 0.529096 0.158315 -0.000008 C -0.710320 -0.719183 0.000019 H -0.659000 -1.387158 0.873745 C -2.042129 0.033149 0.000022 H -2.131337 0.674120 0.883590 H -2.131357 0.674092 -0.883564 H -2.884099 -0.667953 0.000042 H 1.195807 2.288729 -0.000054 H -0.659019 -1.387186 -0.873687 C 1.857186 -0.585275 -0.000009 H 1.937082 -1.233100 0.883409 H 1.937061 -1.233137 -0.883401 H…	83.5306 181.3596 236.2886 245.2142 364.5585 427.2917 474.7827 675.8698 777.8358 794.4714 880.8393 986.9510 1010.3488 1024.5537 1117.2496 1134.6065 1187.0698 1305.2514 1385.2300 1426.6866 1439.8685 1504.9355 1510.6179 1513.2577 1524.4018 1532.9316 1704.5768 3009.9264 3031.0611 3031.9372 3054.2939 3082.3763 3120.9186 3125.1298 3131.6203 3246.4603	0	0	0	0	0	2	0	0	1	0	0	1	0	1	0	0	0	0	0	0	0	0	0	0	0	0	0	0	0	0	0	0	0	0	0
42	[CH2][CH2]C(=[CH2])[CH3]	C5H9	14	-195.867	-195.745	-195.737	-195.832	-195.713	-195.705	40.5065	2	1 2 2.0 8 1.0 9 1.0 2 3 1.0 11 1.0 3 4 1.0 5 1.0 10 1.0 4 5 6 1.0 7 1.0 6 7 8 9 10 11 12 1.0 13 1.0 14 1.0 12 13 14	C -0.459232 1.460411 -0.070209 C -0.486535 0.125162 -0.027551 C 0.767134 -0.735329 -0.092902 H 0.766610 -1.282709 -1.048653 C 2.070948 -0.036575 0.092035 H 2.197953 0.686101 0.891945 H 2.958419 -0.363720 -0.439036 H 0.471319 2.013527 -0.155729 H -1.374377 2.045991 -0.030969 H 0.660353 -1.531259 0.671813 C -1.780407 -0.645397 0.069634 H -1.888893 -1.345353 -0.770852 H -1.813561 -1.251871 0.985485 …	90.0958 155.9415 187.7883 278.5420 396.5714 419.5912 467.9218 530.0197 696.6529 785.3472 872.9818 926.8181 963.6455 1028.7628 1043.5843 1083.7933 1123.4809 1235.3054 1272.5550 1383.6673 1437.9055 1462.3217 1483.2123 1491.3038 1509.8967 1523.8909 1738.6020 2915.8861 3017.0483 3027.8275 3071.4931 3126.3836 3163.0561 3170.9802 3241.3294 3269.7569	0	0	0	0	1	1	0	0	0	1	0	1	0	1	0	0	0	0	0	0	0	0	0	0	0	0	0	0	0	0	0	0	0	0	0
43	CC=C(C)C	C5H10	15	-196.544	-196.407	-196.399	-196.504	-196.371	-196.363	-9.88751	1	1 2 2.0 5 1.0 12 1.0 2 3 1.0 7 1.0 3 4 1.0 6 1.0 11 1.0 4 5 6 7 8 1.0 9 1.0 10 1.0 8 9 10 11 12 13 1.0 14 1.0 15 1.0 13 14 15	C -0.734481 -0.671756 -0.000004 C 0.449519 -0.040574 0.000016 C 0.629903 1.457968 -0.000039 H -0.313624 2.008497 -0.000133 H -0.714492 -1.763025 0.000049 H 1.205478 1.779288 -0.879551 C 1.741489 -0.823907 0.000110 H 2.353875 -0.579982 -0.879785 H 2.353801 -0.579895 0.880032 H 1.564718 -1.904222 0.000156 H 1.205347 1.779368 0.879531 C -2.115248 -0.077712 -0.000083 H -2.683597 -0.409767 0.879810 H …	126.7271 153.1571 185.9864 265.3704 300.2084 384.7473 453.8367 527.2779 775.2220 836.6852 970.3754 980.6258 1031.5822 1074.8299 1080.8364 1119.7678 1143.9475 1247.6156 1392.9026 1439.9479 1442.6059 1454.1615 1502.3828 1513.2693 1513.5200 1521.1868 1528.4601 1528.9934 1760.8497 3021.4353 3028.7790 3031.7046 3064.4279 3069.3727 3070.2718 3118.9897 3124.3910 3138.0956 3147.3592	0	0	0	1	0	3	0	0	0	0	0	1	0	0	0	0	0	0	0	0	0	0	0	0	0	0	0	0	0	0	0	0	0	0	0
44	[CH3][CH]C(=[CH2])[CH3] or [CH3]/[CH]=C(\[CH3])/[CH2]	C5H9	14	-195.896	-195.773	-195.765	-195.856	-195.735	-195.728	26.2584	2	1 2 1.5 5 1.0 11 1.0 2 3 1.0 7 1.5 3 4 1.0 6 1.0 10 1.0 4 5 6 7 8 1.0 9 1.0 8 9 10 11 12 1.0 13 1.0 14 1.0 12 13 14	C -0.698510 -0.711349 -0.000004 C 0.560562 -0.100347 0.000000 C 0.681087 1.413982 -0.000001 H 0.203524 1.857326 0.882125 H -0.720948 -1.800765 -0.000003 H 0.203495 1.857326 -0.882112 C 1.716672 -0.866079 0.000000 H 2.702224 -0.411641 0.000009 H 1.672312 -1.951655 0.000001 H 1.730134 1.723727 -0.000017 C -2.026841 -0.023316 0.000002 H -2.624714 -0.309220 0.878659 H -1.939110 1.066797 -0.000012 H -…	75.3601 144.1053 194.5291 269.9154 425.9355 481.9895 530.6664 566.9529 729.7116 782.7938 801.7418 936.5136 1014.4486 1028.4880 1071.6699 1072.2639 1157.2638 1302.9473 1398.2676 1440.7505 1446.7124 1462.9868 1504.4241 1523.0615 1530.7522 1532.3198 1548.8958 3011.4985 3043.9778 3047.0245 3099.9024 3127.2405 3131.3783 3156.3801 3167.1994 3253.8016	1	1	0	0	0	2	1	0	0	0	0	0	0	0	0	0	0	0	0.0497871	0	0	0	0.0522658	0.00247875	0	0	0	0	0	0	0	0	0	0	0
45	[CH2]=[CH]C([CH3])[CH3] or [CH2][CH]=C([CH3])[CH3]	C5H9	14	-195.899	-195.776	-195.768	-195.859	-195.738	-195.731	24.4366	2	1 2 1.5 5 1.0 12 1.5 2 3 1.0 7 1.0 3 4 1.0 6 1.0 11 1.0 4 5 6 7 8 1.0 9 1.0 10 1.0 8 9 10 11 12 13 1.0 14 1.0 13 14	C -0.847081 -0.665846 -0.000001 C 0.398396 -0.032678 0.000000 C 0.571068 1.459737 0.000000 H -0.377212 2.002179 0.000001 H -0.820701 -1.756754 -0.000003 H 1.144684 1.788442 -0.879448 C 1.665825 -0.840082 0.000001 H 2.287818 -0.611000 -0.879020 H 2.287819 -0.610997 0.879020 H 1.468080 -1.916893 0.000002 H 1.144687 1.788443 0.879444 C -2.102606 -0.083727 0.000001 H -2.996141 -0.698959 -0.000001 H -…	72.8966 146.2728 224.4949 299.9508 345.2765 378.6619 535.8138 568.4867 759.5956 766.5575 945.8107 977.5547 1007.4772 1017.6170 1081.1655 1082.4099 1241.9859 1264.1544 1382.8790 1436.3060 1442.5571 1487.5525 1497.0541 1509.3950 1513.6705 1543.0413 1554.5684 3005.6901 3017.1491 3041.3173 3051.8063 3116.2619 3136.9383 3141.9487 3178.1056 3261.2608	0	0	0	0	0	2	1	1	0	0	1	0	0	0	0	0	0	0	0	0	0	0	0	0	0	0	0	0	0	0	0	0	0	0	0
46	[CH3]C=C([CH3])[CH3]	C5H9	14	-195.864	-195.741	-195.733	-195.826	-195.706	-195.698	45.2416	2	1 2 2.0 11 1.0 2 3 1.0 6 1.0 3 4 1.0 5 1.0 10 1.0 4 5 6 7 1.0 8 1.0 9 1.0 7 8 9 10 11 12 1.0 13 1.0 14 1.0 12 13 14	C -0.770197 -0.570431 0.000001 C 0.447563 -0.061671 0.000027 C 0.713245 1.436351 -0.000049 H -0.209799 2.023389 -0.000124 H 1.300327 1.725937 -0.882506 C 1.681956 -0.940189 0.000118 H 2.306228 -0.739404 -0.881929 H 2.306160 -0.739313 0.882192 H 1.418254 -2.001220 0.000163 H 1.300249 1.726039 0.882426 C -2.187419 -0.167951 -0.000081 H -2.715076 -0.550802 0.883418 H -2.302223 0.929632 -0.000153 H -…	121.5525 173.7637 181.7100 202.2529 246.3747 351.1249 445.7533 497.7047 739.8494 958.7349 971.6215 980.6004 1050.2403 1061.3444 1108.4029 1171.8324 1203.9179 1415.6907 1427.8452 1440.6344 1489.5534 1503.7809 1504.9861 1514.5625 1519.4017 1522.7334 1792.8185 2981.1286 3023.3931 3029.2249 3058.7225 3069.8368 3075.5543 3082.8923 3128.3682 3135.3416	0	0	1	0	0	3	0	0	0	0	0	1	0	0	0	0	0	0	0	0	0	0	0	0	0	0	0	0	0	0	0	0	0	0	0
47	CCCCC	C5H12	17	-197.772	-197.61	-197.602	-197.725	-197.567	-197.559	-35.845	1	1 2 1.0 3 1.0 4 1.0 5 1.0 2 3 4 5 6 1.0 7 1.0 8 1.0 6 7 8 9 1.0 10 1.0 11 1.0 9 10 11 12 1.0 13 1.0 14 1.0 12 13 14 15 1.0 16 1.0 17 1.0 15 16 17	C -2.560911 0.323626 0.000000 H -2.607394 0.970851 -0.884601 H -2.607394 0.970850 0.884602 H -3.458969 -0.304770 -0.000001 C -1.283938 -0.522982 -0.000001 H -1.283425 -1.184646 0.878036 H -1.283425 -1.184644 -0.878039 C 0.000000 0.316408 0.000000 H 0.000000 0.979272 0.878510 H 0.000000 0.979273 -0.878509 C 1.283938 -0.522982 0.000000 H 1.283425 -1.184644 -0.878038 H 1.283425 -1.184646 0.878037 C …	109.2497 112.6660 178.0378 246.1670 253.1913 396.2908 397.4193 739.4407 772.2675 874.6591 881.3353 933.7523 1003.5940 1049.1330 1052.4571 1082.6554 1173.4811 1223.3131 1282.9798 1308.0141 1341.0543 1346.7656 1388.7622 1424.4664 1439.7488 1442.6270 1515.1840 1517.3272 1527.1862 1529.5298 1530.3262 1537.0098 1544.1088 3010.7718 3020.7813 3028.6747 3033.0239 3040.0437 3041.2321 3050.3927 3067.7606 3…	0	0	0	0	0	2	0	0	0	0	0	0	0	3	0	0	0	0	0	0	0	0	0	0	0	0	0	0	0	0	0	0	0	0	0
48	[CH3][CH2][CH][CH2][CH3]	C5H11	16	-197.105	-196.959	-196.95	-197.06	-196.917	-196.908	10.3669	2	1 2 1.0 3 1.0 4 1.0 5 1.0 2 3 4 5 6 1.0 7 1.0 8 1.0 6 7 8 9 1.0 10 1.0 9 10 11 1.0 12 1.0 13 1.0 11 12 13 14 1.0 15 1.0 16 1.0 14 15 16	C -0.052953 -0.432256 2.504707 H 0.913192 -0.942999 2.597436 H -0.825196 -1.201368 2.390447 H -0.240265 0.100053 3.443950 C -0.052953 0.529566 1.308488 H -1.018222 1.056959 1.255678 H 0.693000 1.326933 1.496079 C 0.224574 -0.139144 0.000000 H 0.878414 -1.012011 0.000000 C -0.052953 0.529566 -1.308488 H 0.693000 1.326933 -1.496079 H -1.018222 1.056959 -1.255678 C -0.052953 -0.432256 -2.504707 H -0…	51.4378 58.3624 184.1783 244.2144 244.8841 392.9397 405.2472 423.1928 763.0592 791.1570 883.3817 952.5208 1034.4510 1050.3337 1051.5938 1100.4702 1148.6415 1184.6640 1277.3154 1293.8656 1297.5450 1384.5073 1434.7909 1439.9629 1443.0896 1497.3528 1508.2086 1527.9588 1528.0441 1535.0593 1535.5111 2924.1410 2929.3335 3012.7557 3018.4854 3045.7509 3046.4055 3110.2646 3110.4622 3117.2291 3117.4902 314…	0	0	0	0	0	2	0	0	0	0	0	0	1	2	0	0	0	0	0	0	0	0	0	0	0	0	0	0	0	0	0	0	0	0	0
49	[CH2][CH2][CH2][CH2][CH3]	C5H11	16	-197.099	-196.953	-196.945	-197.055	-196.912	-196.904	13.0822	2	1 2 1.0 3 1.0 4 1.0 2 3 4 5 1.0 6 1.0 7 1.0 5 6 7 8 1.0 9 1.0 10 1.0 8 9 10 11 1.0 12 1.0 13 1.0 11 12 13 14 1.0 15 1.0 16 1.0 14 15 16	C 2.599729 -0.342512 -0.018819 H 2.622010 -1.327192 0.440134 H 3.543231 0.074051 -0.357531 C 1.359995 0.486080 0.022160 H 1.338800 1.094413 0.947910 H 1.373615 1.220370 -0.797211 C 0.061502 -0.336453 -0.042736 H 0.060663 -1.070498 0.776684 H 0.050985 -0.919509 -0.974230 C -1.207724 0.519892 0.041247 H -1.203396 1.255051 -0.776235 H -1.190270 1.102679 0.973423 C -2.497313 -0.304809 -0.021622 H -2.…	99.4422 113.6462 132.5536 181.7030 249.6844 391.2825 401.3664 465.8339 733.9048 779.1508 869.8792 918.8547 952.4576 1033.2357 1067.1912 1091.6573 1110.9508 1177.3386 1248.0434 1299.6814 1321.2677 1343.7782 1382.9997 1420.1647 1441.2120 1487.6144 1498.7120 1516.5151 1527.1352 1529.9033 1540.9328 2926.9038 3018.3290 3022.9827 3030.6822 3041.3931 3044.9597 3069.7237 3106.1261 3110.6834 3160.2431 325…	0	0	0	0	1	1	0	0	0	0	0	0	0	3	0	0	0	0	0	0	0	0	0	0	0	0	0	0	0	0	0	0	0	0	0
50	[CH3][CH][CH2][CH2][CH3]	C5H11	16	-197.106	-196.959	-196.951	-197.06	-196.917	-196.909	10.0951	2	1 2 1.0 3 1.0 4 1.0 5 1.0 2 3 4 5 6 1.0 7 1.0 6 7 8 1.0 9 1.0 10 1.0 8 9 10 11 1.0 12 1.0 13 1.0 11 12 13 14 1.0 15 1.0 16 1.0 14 15 16	C 2.617826 -0.220429 -0.086187 H 2.584818 -1.014144 -0.845749 H 2.949819 -0.706225 0.850340 H 3.405570 0.487107 -0.369566 C 1.293358 0.451771 0.063409 H 1.273084 1.490110 0.391653 C 0.018136 -0.326503 0.120171 H -0.074165 -0.842479 1.097470 H 0.047631 -1.140287 -0.622759 C -1.242809 0.524686 -0.099951 H -1.176375 1.015693 -1.080004 H -1.263308 1.332300 0.645346 C -2.539802 -0.284778 -0.013281 H -…	57.0256 97.4908 127.2966 190.4076 244.4338 388.0343 401.9904 421.1328 743.8074 864.6063 884.0401 938.6814 994.9592 1048.5079 1066.6553 1106.7450 1146.5779 1184.8501 1264.1000 1300.9082 1334.0633 1386.7298 1431.1015 1438.7366 1442.6977 1499.3125 1505.3849 1517.2538 1521.9751 1529.2269 1538.6266 2915.6151 2955.7971 3003.8609 3031.5270 3040.6140 3044.2454 3064.5654 3101.0085 3105.1700 3111.0581 3163…	0	0	0	0	0	2	0	0	0	0	0	0	1	2	0	0	0	0	0	0	0	0	0	0	0	0	0	0	0	0	0	0	0	0	0
51	CCC(C)C	C5H12	17	-197.771	-197.61	-197.602	-197.726	-197.569	-197.561	-36.8696	1	1 2 1.0 3 1.0 4 1.0 5 1.0 2 3 4 5 6 1.0 7 1.0 14 1.0 6 7 8 1.0 9 1.0 10 1.0 8 9 10 11 1.0 12 1.0 13 1.0 11 12 13 14 15 1.0 16 1.0 17 1.0 15 16 17	C -1.742256 -0.821724 -0.010751 H -1.922228 -0.857823 1.071889 H -1.648515 -1.854923 -0.366329 H -2.631968 -0.384600 -0.479570 C -0.482643 -0.002681 -0.329739 H -0.349146 -0.003316 -1.423210 C 0.764450 -0.664680 0.289758 H 0.773650 -1.725323 0.001711 H 0.667104 -0.649695 1.385801 C 2.101623 -0.032686 -0.113732 H 2.190482 1.001288 0.237340 H 2.943219 -0.594430 0.307619 H 2.221892 -0.024561 -1.2044…	96.1859 218.4841 228.0965 263.0985 267.7008 365.8838 415.6345 456.9531 770.2048 805.7390 922.7148 938.8475 974.0526 995.1366 1035.4956 1054.5008 1180.3319 1206.9501 1218.5155 1313.6534 1343.9661 1387.2417 1404.8148 1429.5178 1441.1792 1448.9240 1511.1033 1519.0205 1526.1711 1530.7357 1535.4134 1538.5916 1544.1793 3000.6903 3018.5720 3034.0018 3039.8461 3044.0013 3052.2465 3096.0105 3101.9006 3106…	0	0	0	0	0	3	0	0	0	0	0	0	0	1	0	1	0	0	0	0	0	0	0	0	0	0	0	0	0	0	0	0	0	0	0
52	[CH2][CH2][CH]([CH3])[CH3]	C5H11	16	-197.099	-196.954	-196.945	-197.058	-196.915	-196.907	11.177	2	1 2 1.0 3 1.0 4 1.0 5 1.0 2 3 4 5 6 1.0 7 1.0 13 1.0 6 7 8 1.0 9 1.0 10 1.0 8 9 10 11 1.0 12 1.0 11 12 13 14 1.0 15 1.0 16 1.0 14 15 16	C -1.693760 -0.806057 -0.018748 H -1.869155 -0.859837 1.063863 H -1.612021 -1.833300 -0.394106 H -2.581054 -0.351372 -0.474926 C -0.430339 0.007926 -0.329108 H -0.294338 0.019323 -1.421857 C 0.821820 -0.662687 0.282084 H 0.806883 -1.732456 -0.003831 H 0.736781 -0.657048 1.379176 C 2.116245 -0.048598 -0.133471 H 2.982590 -0.056324 0.520199 H 2.268055 0.270702 -1.161415 C -0.578199 1.460234 0.14527…	117.3017 126.3603 228.1529 238.5542 264.2366 357.8645 400.3668 449.1698 489.7322 789.8552 829.3397 937.0275 945.9299 975.3193 983.3880 1085.7926 1119.9361 1198.5165 1203.3009 1256.7134 1331.9031 1380.6606 1398.0578 1428.2009 1446.9097 1486.1929 1496.3255 1517.8461 1523.8544 1533.3733 1538.6988 2931.1117 3004.6890 3032.5562 3034.2369 3040.3193 3096.4945 3102.3823 3107.8879 3115.4886 3158.6981 3256…	0	0	0	0	1	2	0	0	0	0	0	0	0	1	0	1	0	0	0	0	0	0	0	0	0	0	0	0	0	0	0	0	0	0	0
53	[CH3][CH][CH]([CH3])[CH3]	C5H11	16	-197.105	-196.959	-196.951	-197.061	-196.919	-196.91	9.20525	2	1 2 1.0 3 1.0 4 1.0 5 1.0 2 3 4 5 6 1.0 7 1.0 13 1.0 6 7 8 1.0 9 1.0 8 9 10 1.0 11 1.0 12 1.0 10 11 12 13 14 1.0 15 1.0 16 1.0 14 15 16	C -1.630530 -0.969445 -0.034578 H -1.841674 -1.024456 1.041304 H -1.411053 -1.984449 -0.383826 H -2.543682 -0.625813 -0.534922 C -0.453219 -0.019187 -0.310200 H -0.280255 0.006009 -1.398319 C 0.807530 -0.498292 0.348861 H 0.721423 -0.936960 1.343028 C 2.162696 -0.088059 -0.125626 H 2.449806 0.919364 0.228562 H 2.941743 -0.773755 0.228816 H 2.213404 -0.055023 -1.222535 C -0.810036 1.425478 0.12150…	52.7350 107.4731 229.6715 239.6070 266.0904 343.8143 347.2046 464.3387 512.5753 800.0369 910.7437 937.0179 964.9105 996.7937 1020.1495 1100.7652 1130.7450 1194.0087 1211.3135 1321.4753 1347.2895 1413.6261 1427.8679 1437.6482 1444.7887 1504.1507 1516.4377 1517.9371 1520.1939 1531.7442 1539.0508 2956.5065 2993.6837 3035.1031 3040.2019 3047.9718 3096.5795 3098.7919 3104.6971 3113.4437 3115.6569 3153…	0	0	0	0	0	3	0	0	0	0	0	0	1	0	0	1	0	0	0	0	0	0	0	0	0	0	0	0	0	0	0	0	0	0	0
54	[CH3][CH2][C@@H]([CH3])[CH2]	C5H11	16	-197.099	-196.953	-196.944	-197.057	-196.914	-196.906	11.9327	2	1 2 1.0 3 1.0 4 1.0 5 1.0 2 3 4 5 6 1.0 7 1.0 14 1.0 6 7 8 1.0 9 1.0 10 1.0 8 9 10 11 1.0 12 1.0 13 1.0 11 12 13 14 15 1.0 16 1.0 15 16	C -1.781511 -0.742206 -0.000078 H -1.948051 -0.793895 1.082579 H -1.709956 -1.768536 -0.382388 H -2.661225 -0.271143 -0.452033 C -0.491264 0.054857 -0.320147 H -0.373798 0.047395 -1.415655 C 0.741488 -0.641289 0.293333 H 0.723480 -1.703967 0.015131 H 0.653439 -0.611364 1.389595 C 2.077485 -0.025413 -0.133562 H 2.137928 1.030635 0.152808 H 2.922138 -0.549609 0.328087 H 2.206352 -0.079619 -1.221811…	118.6282 126.5387 225.9848 234.7035 257.9742 329.1293 417.9611 433.2550 544.8032 784.9008 803.9757 924.0023 957.4118 994.4594 1019.5151 1029.8813 1098.6590 1186.0096 1210.1246 1308.0229 1325.4633 1374.3414 1398.4688 1425.2681 1439.3789 1486.0808 1516.5634 1524.3069 1527.3425 1529.3322 1536.9781 2996.7367 3022.4350 3037.3465 3043.5536 3057.5981 3103.8571 3107.2441 3115.9929 3116.6318 3151.3447 324…	0	0	0	0	1	2	0	0	0	0	0	0	0	1	0	1	0	0	0	0	0	0	0	0	0	0	0	0	0	0	0	0	0	0	0
55	[CH3][CH2]C([CH3])[CH3]	C5H11	16	-197.11	-196.964	-196.955	-197.064	-196.922	-196.913	7.43043	2	1 2 1.0 3 1.0 4 1.0 5 1.0 2 3 4 5 6 1.0 13 1.0 6 7 1.0 8 1.0 9 1.0 7 8 9 10 1.0 11 1.0 12 1.0 10 11 12 13 14 1.0 15 1.0 16 1.0 14 15 16	C -1.749512 -0.837877 -0.140523 H -2.197132 -0.993552 0.860028 H -1.552451 -1.836654 -0.550207 H -2.526631 -0.364392 -0.754278 C -0.505264 -0.004491 -0.080103 C 0.780146 -0.671355 0.331154 H 0.746014 -1.726735 0.027444 H 0.855558 -0.692216 1.436884 C 2.066147 -0.035378 -0.222636 H 2.207202 0.987042 0.144291 H 2.944588 -0.616011 0.080830 H 2.046855 0.001819 -1.317946 C -0.658813 1.479726 0.066396 …	20.5357 110.4590 123.9089 201.6160 272.0544 312.4371 381.9443 449.2448 738.1209 777.8129 945.2163 952.3358 996.3948 1008.1266 1048.5834 1072.2474 1118.4240 1258.8830 1295.2273 1317.4148 1395.7850 1426.9220 1436.4499 1446.6175 1497.9405 1502.4600 1512.4476 1514.8346 1523.2883 1531.3955 1538.7261 2920.3394 2941.2830 2948.3905 3042.8918 3049.0666 3050.6526 3062.7570 3095.9389 3105.4978 3114.9045 311…	0	0	0	0	0	3	0	0	0	0	0	0	0	1	1	0	0	0	0	0	0	0	0	0	0	0	0	0	0	0	0	0	0	0	0
56	CC(C)(C)C	C5H12	17	-197.773	-197.613	-197.605	-197.731	-197.574	-197.566	-40.1838	1	1 2 1.0 3 1.0 4 1.0 5 1.0 2 3 4 5 6 1.0 10 1.0 14 1.0 6 7 1.0 8 1.0 9 1.0 7 8 9 10 11 1.0 12 1.0 13 1.0 11 12 13 14 15 1.0 16 1.0 17 1.0 15 16 17	C 0.889321 0.889321 0.889321 H 1.535671 0.282560 1.535671 H 0.282560 1.535671 1.535671 H 1.535671 1.535671 0.282560 C 0.000000 0.000000 0.000000 C -0.889321 -0.889321 0.889321 H -1.535671 -0.282560 1.535671 H -1.535671 -1.535671 0.282560 H -0.282560 -1.535671 1.535671 C 0.889321 -0.889321 -0.889321 H 0.282560 -1.535671 -1.535671 H 1.535671 -0.282560 -1.535671 H 1.535671 -1.535671 -0.282560 C -0.8…	208.4788 276.4760 276.4760 276.4760 327.7433 327.7433 413.2521 413.2521 413.2521 731.6222 933.9936 933.9936 933.9936 971.4957 971.4957 971.4957 1100.6430 1100.6430 1289.3264 1289.3264 1289.3264 1427.1390 1427.1390 1427.1390 1464.4732 1512.4037 1512.4037 1512.4037 1520.8772 1520.8772 1546.1414 1546.1414 1546.1414 3031.8256 3031.8256 3031.8256 3043.7876 3098.0318 3098.0318 3098.0318 3098.7300 3098.…	0	0	0	0	0	4	0	0	0	0	0	0	0	0	0	0	1	0	0	0	0	0	0	0	0	0	0	0	0	0	0	0	0	0	0
57	[CH3]C([CH2])([CH3])[CH3]	C5H11	16	-197.099	-196.954	-196.946	-197.059	-196.917	-196.909	9.92657	2	1 2 1.0 3 1.0 4 1.0 5 1.0 2 3 4 5 6 1.0 9 1.0 13 1.0 6 7 1.0 8 1.0 7 8 9 10 1.0 11 1.0 12 1.0 10 11 12 13 14 1.0 15 1.0 16 1.0 14 15 16	C 0.000005 -1.310442 0.778462 H 0.886211 -1.916766 0.558721 H -0.886195 -1.916773 0.558719 H 0.000003 -1.086086 1.853620 C 0.000000 0.000452 -0.054380 C 0.000000 -0.339408 -1.517551 H -0.929095 -0.566452 -2.033732 H 0.929095 -0.566451 -2.033731 C 1.261737 0.817064 0.295523 H 1.287680 1.759744 -0.263059 H 1.290382 1.055284 1.365886 H 2.173139 0.257085 0.052633 C -1.261742 0.817056 0.295525 H -1.29…	117.2580 225.4535 274.9384 280.7757 305.5157 329.2731 384.6362 414.2131 416.1063 533.6508 740.5964 914.3117 922.9254 957.3210 959.7594 970.1616 1043.5836 1087.6167 1216.4764 1280.1405 1293.3308 1417.4428 1424.0175 1444.7336 1488.3504 1508.8922 1515.2213 1517.2409 1531.5724 1532.7483 1547.2978 3031.5531 3036.4498 3043.0163 3098.0134 3102.4140 3107.2653 3109.2744 3114.2330 3115.3269 3151.3006 3249.…	0	0	0	0	1	3	0	0	0	0	0	0	0	0	0	0	1	0	0	0	0	0	0	0	0	0	0	0	0	0	0	0	0	0	0
58	C=CCCCC	C6H12	18	-235.849	-235.682	-235.674	-235.804	-235.642	-235.633	-10.0912	1	1 2 1.0 3 1.0 4 2.0 2 3 4 5 1.0 6 1.0 5 6 7 1.0 8 1.0 9 1.0 7 8 9 10 1.0 11 1.0 12 1.0 10 11 12 13 1.0 14 1.0 15 1.0 13 14 15 16 1.0 17 1.0 18 1.0 16 17 18	C 3.088029 -0.177401 -0.440512 H 3.095018 0.452011 -1.328612 H 3.975829 -0.779840 -0.266718 C 2.045631 -0.202661 0.390808 H 2.084965 -0.852260 1.267727 C 0.777072 0.588270 0.221916 H 0.643468 1.252754 1.090050 H 0.862093 1.239200 -0.658559 C -0.474285 -0.300769 0.090729 H -0.539593 -0.967224 0.963520 H -0.358526 -0.955340 -0.784291 C -1.776068 0.500782 -0.033632 H -1.708038 1.168934 -0.903946 H -…	74.9608 93.0165 129.5205 176.0159 248.5590 355.9757 356.6413 457.7468 650.9145 743.6819 805.4386 907.1193 933.4893 936.5283 950.2362 1027.2461 1035.7765 1059.2720 1067.5665 1133.8706 1209.2793 1262.1861 1287.8417 1327.9603 1335.6994 1347.7205 1374.1169 1416.9971 1441.1780 1475.6849 1510.2024 1517.0303 1528.8614 1529.8400 1541.4831 1733.1379 3008.4335 3019.6069 3027.5655 3041.5413 3045.1622 3056.7…	0	0	0	1	0	1	0	0	0	1	0	0	0	3	0	0	0	0	0	0	0	0	0	0	0	0	0	0	0	0	0	0	0	0	0
59	[CH2]=[CH][CH2][CH][CH2][CH3]	C6H11	17	-235.182	-235.031	-235.021	-235.138	-234.99	-234.981	36.332	2	1 2 1.0 3 1.0 4 2.0 2 3 4 5 1.0 6 1.0 5 6 7 1.0 8 1.0 9 1.0 7 8 9 10 1.0 11 1.0 10 11 12 1.0 13 1.0 14 1.0 12 13 14 15 1.0 16 1.0 17 1.0 15 16 17	C 3.098133 -0.281357 -0.271873 H 3.265291 0.365108 -1.131555 H 3.909281 -0.954155 -0.006159 C 1.958836 -0.245540 0.419584 H 1.828659 -0.915369 1.270589 C 0.784477 0.650998 0.112700 H 0.603138 1.323915 0.966830 H 1.054538 1.314404 -0.730598 C -0.475662 -0.106462 -0.186780 H -0.389704 -1.015316 -0.781207 C -1.830471 0.500042 -0.006085 H -2.023458 1.246754 -0.801258 H -1.854328 1.077282 0.931366 C -…	44.9037 50.1583 85.8855 204.5496 247.3263 349.4994 356.7353 445.6263 454.3419 649.4720 776.4303 871.0796 926.7528 937.8492 949.8829 1034.3360 1035.8221 1060.9343 1110.4693 1138.8598 1151.2931 1246.1582 1279.7129 1288.0398 1334.0563 1370.1409 1431.7199 1439.0265 1470.0800 1490.8794 1503.7815 1527.8268 1535.1037 1730.1425 2928.4578 2944.6358 3005.0690 3016.8366 3047.1959 3112.0244 3118.3467 3145.44…	0	0	0	1	0	1	0	0	0	1	0	0	1	2	0	0	0	0	0	0	0	0	0	0	0	0	0	0	0	0	0	0	0	0	0
60	[CH2]=[CH][CH2][CH2][CH2][CH2]	C6H11	17	-235.176	-235.025	-235.016	-235.134	-234.987	-234.977	38.7903	2	1 2 1.0 3 1.0 4 2.0 2 3 4 5 1.0 6 1.0 5 6 7 1.0 8 1.0 9 1.0 7 8 9 10 1.0 11 1.0 12 1.0 10 11 12 13 1.0 14 1.0 15 1.0 13 14 15 16 1.0 17 1.0 16 17	C -3.016635 -0.227730 0.414160 H -3.010308 0.248233 1.393098 H -3.913132 -0.783095 0.151246 C -1.979657 -0.129249 -0.418450 H -2.032174 -0.626046 -1.389382 C -0.700290 0.608567 -0.131843 H -0.560388 1.401297 -0.883541 H -0.773422 1.111363 0.841892 C 0.537523 -0.307526 -0.151052 H 0.596473 -0.827525 -1.116915 H 0.418807 -1.088711 0.612062 C 1.852810 0.452231 0.094741 H 1.760589 1.003208 1.051364 H…	75.2117 90.3670 117.5736 136.0551 177.8061 355.3357 359.7675 448.7242 473.9404 651.6683 738.1611 819.0486 913.9916 937.4055 945.8691 1000.5254 1036.8804 1041.8318 1088.5877 1096.8662 1150.7549 1226.8894 1278.6936 1305.1946 1330.9751 1343.7085 1369.6606 1410.2221 1475.5071 1487.5102 1499.0952 1510.3868 1531.0572 1733.2093 2928.7613 3008.8179 3029.3459 3036.0486 3055.6601 3080.2175 3134.7885 3154.5…	0	0	0	1	1	0	0	0	0	1	0	0	0	3	0	0	0	0	0	0	0	0	0	0	0	0	0	0	0	0	0	0	0	0	0
61	[CH]=[CH][CH2][CH2][CH2][CH3]	C6H11	17	-235.162	-235.009	-235.001	-235.12	-234.971	-234.962	48.2125	2	1 2 1.0 3 2.0 2 3 4 1.0 5 1.0 4 5 6 1.0 7 1.0 8 1.0 6 7 8 9 1.0 10 1.0 11 1.0 9 10 11 12 1.0 13 1.0 14 1.0 12 13 14 15 1.0 16 1.0 17 1.0 15 16 17	C 3.134603 -0.233510 -0.477341 H 4.104932 -0.714397 -0.491980 C 2.120274 -0.134673 0.350903 H 2.173199 -0.656579 1.317781 C 0.838561 0.627639 0.098140 H 0.722856 1.399047 0.874635 H 0.910776 1.152497 -0.861565 C -0.404604 -0.280003 0.108695 H -0.448351 -0.826958 1.062270 H -0.298038 -1.041941 -0.675658 C -1.715001 0.490816 -0.095159 H -1.667785 1.039363 -1.046538 H -1.812801 1.253328 0.690795 C -…	76.8438 95.1973 128.3752 182.0790 248.7651 354.6467 366.6156 444.0142 653.2339 743.5051 791.6090 815.3579 829.9807 907.9280 944.8920 1014.1387 1037.1042 1066.9142 1132.5842 1156.1976 1246.2417 1274.3986 1303.8604 1329.3309 1345.2967 1374.9037 1416.9767 1441.4019 1508.8402 1517.0244 1528.6093 1529.9003 1541.3914 1695.6710 3016.0178 3019.7310 3025.1509 3028.1624 3041.7901 3047.3961 3066.6024 3090.3…	0	0	0	1	0	1	0	0	1	0	0	0	0	3	0	0	0	0	0	0	0	0	0	0	0	0	0	0	0	0	0	0	0	0	0
62	[CH2]=[CH][CH2][CH2][CH][CH3]	C6H11	17	-235.182	-235.031	-235.022	-235.139	-234.991	-234.982	35.8058	2	1 2 1.0 3 1.0 4 2.0 2 3 4 5 1.0 6 1.0 5 6 7 1.0 8 1.0 9 1.0 7 8 9 10 1.0 11 1.0 12 1.0 10 11 12 13 1.0 14 1.0 13 14 15 1.0 16 1.0 17 1.0 15 16 17	C 3.033944 -0.357480 -0.388420 H 2.990988 -0.223478 -1.467777 H 3.942400 -0.802552 0.008970 C 2.025451 0.010395 0.402735 H 2.114091 -0.147070 1.479778 C 0.734495 0.625144 -0.062880 H 0.621636 1.623973 0.386746 H 0.760474 0.772078 -1.149767 C -0.504100 -0.216299 0.314075 H -0.482958 -0.399151 1.407161 H -0.417878 -1.214809 -0.140574 C -1.798212 0.416911 -0.083767 H -1.862292 1.504011 -0.063072 C -…	51.0515 85.4964 96.8364 127.0036 181.7373 352.1836 364.7920 419.4091 456.4188 649.9116 769.8692 912.1756 937.7475 939.7357 966.3398 1009.9196 1031.3300 1039.7617 1113.8495 1134.0263 1160.8774 1235.3095 1281.8400 1317.3259 1337.7260 1368.5876 1425.2287 1440.1982 1475.2858 1499.6492 1505.0889 1515.8629 1519.0336 1733.3556 2920.8442 2957.0599 3010.9735 3028.4551 3046.3117 3076.0502 3102.0366 3132.75…	0	0	0	1	0	1	0	0	0	1	0	0	1	2	0	0	0	0	0	0	0	0	0	0	0	0	0	0	0	0	0	0	0	0	0
63	[CH2]=C[CH2][CH2][CH2][CH3]	C6H11	17	-235.17	-235.017	-235.008	-235.126	-234.977	-234.968	44.5425	2	1 2 1.0 3 1.0 4 2.0 2 3 4 5 1.0 5 6 1.0 7 1.0 8 1.0 6 7 8 9 1.0 10 1.0 11 1.0 9 10 11 12 1.0 13 1.0 14 1.0 12 13 14 15 1.0 16 1.0 17 1.0 15 16 17	C -3.206964 -0.342036 0.232135 H -3.438498 0.019262 1.241908 H -3.985814 -0.935292 -0.245891 C -2.064668 -0.069961 -0.356435 C -0.796173 0.640497 -0.105078 H -0.670429 1.444131 -0.846028 H -0.850786 1.140627 0.880109 C 0.442269 -0.278574 -0.144106 H 0.485907 -0.778037 -1.121188 H 0.319904 -1.073979 0.603155 C 1.752709 0.475664 0.110242 H 1.698847 0.979079 1.086106 H 1.862947 1.273609 -0.637992 C …	75.1919 90.9204 124.0498 182.0071 247.6672 301.2285 354.3410 400.4499 552.4097 741.5651 796.6768 880.5143 903.3798 911.2486 942.3128 1014.7697 1030.5668 1066.1616 1132.5469 1153.7288 1250.0441 1283.4902 1321.1060 1343.1056 1366.8475 1415.3308 1441.4842 1445.3876 1486.9059 1517.0735 1527.3054 1529.9059 1541.0064 1759.7502 2951.3608 3023.3284 3029.8710 3039.3037 3044.0776 3049.2766 3055.0560 3081.8…	0	0	1	0	0	1	0	0	0	1	0	0	0	3	0	0	0	0	0	0	0	0	0	0	0	0	0	0	0	0	0	0	0	0	0
64	C/C=C/CCC	C6H12	18	-235.854	-235.688	-235.679	-235.808	-235.646	-235.637	-12.8048	1	1 2 2.0 14 1.0 15 1.0 2 3 1.0 4 1.0 3 4 5 1.0 6 1.0 7 1.0 5 6 7 8 1.0 9 1.0 10 1.0 8 9 10 11 1.0 12 1.0 13 1.0 11 12 13 14 15 16 1.0 17 1.0 18 1.0 16 17 18	C 1.807336 -0.361619 -0.225008 C 0.744869 0.094806 0.443593 H 0.868059 0.964226 1.094382 C -0.644221 -0.478526 0.370049 H -0.641536 -1.377276 -0.261774 H -0.961546 -0.805645 1.373019 C -1.685890 0.522720 -0.165425 H -1.390234 0.838334 -1.174675 H -1.667387 1.429439 0.455542 C -3.106125 -0.050246 -0.193662 H -3.435449 -0.344168 0.810756 H -3.162280 -0.940086 -0.832846 H -3.824846 0.681947 -0.57901…	77.5137 93.8468 145.1357 212.5166 248.3765 285.8941 310.7334 387.0141 533.7251 751.2420 781.5343 880.7308 906.0907 935.8926 1013.5778 1038.7649 1062.4248 1078.9477 1097.4123 1123.1071 1190.3452 1268.4426 1308.4037 1332.9871 1350.8531 1363.2186 1406.9227 1439.8886 1442.7718 1508.8541 1510.2470 1522.7555 1523.7101 1529.3497 1539.2652 1759.1252 3004.8646 3028.4812 3032.0514 3040.6566 3051.5525 3071.…	0	0	0	2	0	2	0	0	0	0	0	0	0	2	0	0	0	0	0	0	0	0	0	0	0	0	0	0	0	0	0	0	0	0	0
65	[CH2]=[CH][CH][CH2][CH2][CH3] or [CH2]/[CH]=[CH]/[CH2][CH2][CH3]	C6H11	17	-235.208	-235.056	-235.047	-235.16	-235.011	-235.003	22.8318	2	1 2 1.5 14 1.0 15 1.5 2 3 1.0 4 1.0 3 4 5 1.0 6 1.0 7 1.0 5 6 7 8 1.0 9 1.0 10 1.0 8 9 10 11 1.0 12 1.0 13 1.0 11 12 13 14 15 16 1.0 17 1.0 16 17	C 1.924436 -0.387623 -0.137991 C 0.814961 0.247930 0.404484 H 0.939016 1.259482 0.794440 C -0.558632 -0.344207 0.481571 H -0.540896 -1.378403 0.111146 H -0.881952 -0.399199 1.534578 C -1.619080 0.461239 -0.300363 H -1.326241 0.504337 -1.357444 H -1.619129 1.499200 0.060047 C -3.026903 -0.128338 -0.172206 H -3.352968 -0.153236 0.874985 H -3.063224 -1.156059 -0.554121 H -3.758631 0.461869 -0.735419…	62.9489 92.7237 144.9065 245.8117 275.6766 311.7406 375.0351 531.3740 549.3680 747.3296 753.1615 783.9735 872.5186 898.5700 949.4864 1003.3462 1041.5582 1057.8535 1108.0515 1169.2429 1223.1012 1261.8208 1296.0868 1303.9317 1337.1833 1373.2612 1403.5276 1439.7257 1505.5298 1520.8980 1523.1105 1529.3225 1538.3141 1543.1058 2989.0729 3035.2496 3041.3554 3051.7114 3073.3242 3107.4782 3112.4580 3133.2…	1	0	0	0	0	1	1	1	0	0	0	0	0	2	0	0	0	0	0	0	0	0	0.00012341	0.00247875	0.0497871	0	0	0	0	0	0.0522658	0	0	0	0
66	[CH3]/[CH]=[CH]/[CH2][CH2][CH2]	C6H11	17	-235.182	-235.031	-235.022	-235.138	-234.991	-234.982	36.0949	2	1 2 2.0 13 1.0 14 1.0 2 3 1.0 4 1.0 3 4 5 1.0 6 1.0 7 1.0 5 6 7 8 1.0 9 1.0 10 1.0 8 9 10 11 1.0 12 1.0 11 12 13 14 15 1.0 16 1.0 17 1.0 15 16 17	C -1.739962 0.294969 -0.308089 C -0.669593 0.023360 0.443440 H -0.781204 -0.659376 1.289662 C 0.712984 0.570466 0.217870 H 0.704735 1.278564 -0.620122 H 1.036557 1.138468 1.104120 C 1.761565 -0.532960 -0.054212 H 1.469809 -1.099244 -0.949373 H 1.714455 -1.264019 0.776350 C 3.149299 -0.008352 -0.202606 H 3.490588 0.829641 0.399219 H 3.890370 -0.536532 -0.794058 H -1.625574 0.974689 -1.155177 C -3.…	77.8927 94.2169 122.7538 148.1282 213.6759 285.8700 313.9329 389.7477 455.4970 538.6124 750.3646 780.4983 883.7616 926.4596 991.7112 1013.6183 1073.1416 1079.4637 1092.1577 1099.6262 1140.7738 1214.3265 1302.0364 1308.6411 1346.5401 1361.3060 1396.7391 1442.6238 1485.8302 1498.8864 1510.0202 1516.3853 1523.4427 1758.9588 2932.0990 3010.2101 3029.0692 3048.6351 3074.2325 3075.5263 3111.9958 3122.1…	0	0	0	2	1	1	0	0	0	0	0	0	0	2	0	0	0	0	0	0	0	0	0	0	0	0	0	0	0	0	0	0	0	0	0
67	[CH3]/C=[CH]/[CH2][CH2][CH3]	C6H11	17	-235.174	-235.022	-235.013	-235.129	-234.981	-234.971	42.4648	2	1 2 2.0 14 1.0 2 3 1.0 4 1.0 3 4 5 1.0 6 1.0 7 1.0 5 6 7 8 1.0 9 1.0 10 1.0 8 9 10 11 1.0 12 1.0 13 1.0 11 12 13 14 15 1.0 16 1.0 17 1.0 15 16 17	C 1.838101 -0.148534 -0.266157 C 0.760255 -0.151366 0.487944 H 0.838685 0.223281 1.520651 C -0.618633 -0.606767 0.066613 H -0.571231 -1.021380 -0.947610 H -0.948164 -1.423980 0.726886 C -1.664347 0.521970 0.119226 H -1.349254 1.329967 -0.553991 H -1.679223 0.954345 1.129752 C -3.071643 0.048454 -0.257134 H -3.420454 -0.739270 0.422234 H -3.093558 -0.360005 -1.275001 H -3.794836 0.870814 -0.212953…	69.9184 90.9550 134.4082 207.3424 234.9619 251.3387 287.9322 366.2023 490.4702 748.5220 766.0152 869.4025 903.1848 926.9594 1032.4856 1044.4277 1062.2362 1080.3875 1122.1435 1152.7227 1260.4188 1298.4504 1334.8181 1343.1035 1402.3582 1426.7642 1439.9078 1487.9655 1506.3822 1509.0049 1522.7890 1529.1983 1539.1196 1784.5030 2981.5049 3005.2174 3013.4750 3031.5162 3040.8558 3062.0492 3063.5471 3083.…	0	0	1	1	0	2	0	0	0	0	0	0	0	2	0	0	0	0	0	0	0	0	0	0	0	0	0	0	0	0	0	0	0	0	0
68	[CH3]/[CH]=[CH]/[CH2][CH][CH3]	C6H11	17	-235.188	-235.037	-235.028	-235.143	-234.995	-234.986	33.3725	2	1 2 2.0 13 1.0 14 1.0 2 3 1.0 4 1.0 3 4 5 1.0 6 1.0 7 1.0 5 6 7 8 1.0 9 1.0 8 9 10 1.0 11 1.0 12 1.0 10 11 12 13 14 15 1.0 16 1.0 17 1.0 15 16 17	C -1.801929 0.289267 -0.277789 C -0.692926 0.004203 0.409369 H -0.743819 -0.723240 1.221860 C 0.668909 0.598112 0.147212 H 0.580609 1.353392 -0.657205 H 1.005901 1.160422 1.034204 C 1.709783 -0.425481 -0.199499 H 1.402587 -1.269447 -0.813866 C 3.167379 -0.151975 -0.030264 H 3.375915 0.354659 0.922369 H 3.565121 0.508417 -0.823288 H 3.761009 -1.072896 -0.062295 H -1.740880 1.012737 -1.093691 C -3.…	51.5098 76.8073 106.4615 165.6768 214.3898 272.2387 322.0070 383.4622 441.0751 526.1135 774.7539 875.9016 913.1488 943.5470 1004.7778 1014.0503 1078.5599 1080.1350 1115.6262 1130.3002 1152.7273 1223.5572 1301.7725 1343.8700 1356.4618 1415.2881 1438.0683 1442.4509 1489.0808 1504.2291 1510.2007 1516.4404 1522.9510 1756.7177 2937.9248 2956.6447 2996.9744 3029.0695 3045.7316 3074.1589 3101.6849 3112.…	0	0	0	2	0	2	0	0	0	0	0	0	1	1	0	0	0	0	0	0	0	0	0	0	0	0	0	0	0	0	0	0	0	0	0
69	[CH3]/[CH]=C/[CH2][CH2][CH3]	C6H11	17	-235.174	-235.022	-235.013	-235.129	-234.98	-234.971	42.6616	2	1 2 2.0 13 1.0 14 1.0 2 3 1.0 3 4 1.0 5 1.0 6 1.0 4 5 6 7 1.0 8 1.0 9 1.0 7 8 9 10 1.0 11 1.0 12 1.0 10 11 12 13 14 15 1.0 16 1.0 17 1.0 15 16 17	C -1.895215 -0.312438 0.304313 C -0.746056 -0.129492 -0.310530 C 0.657766 -0.580038 -0.240154 H 0.748802 -1.355047 0.544487 H 0.939880 -1.072828 -1.183017 C 1.660292 0.556122 0.050130 H 1.386885 1.036280 0.998206 H 1.559034 1.325706 -0.725562 C 3.108459 0.062806 0.110199 H 3.411427 -0.397304 -0.838539 H 3.241288 -0.687786 0.899184 H 3.799949 0.887537 0.315802 H -1.929492 -1.013579 1.151930 C -3.2…	77.9838 89.0153 112.0589 197.1821 233.7871 244.9222 307.3657 404.0377 500.9537 738.6305 755.7033 863.9398 885.1592 907.3281 1039.0861 1060.8857 1069.3524 1084.3856 1120.3311 1144.8146 1255.0430 1298.0166 1327.4581 1337.6797 1399.0057 1432.5865 1440.5796 1486.2726 1514.1942 1519.2244 1522.1122 1528.9005 1537.9121 1783.3163 2947.2018 3014.7458 3025.0817 3034.4347 3041.5379 3047.6738 3078.8585 3080.…	0	0	1	1	0	2	0	0	0	0	0	0	0	2	0	0	0	0	0	0	0	0	0	0	0	0	0	0	0	0	0	0	0	0	0
70	CC/C=C/CC	C6H12	18	-235.854	-235.688	-235.679	-235.808	-235.645	-235.636	-12.3157	1	1 2 2.0 10 1.0 11 1.0 2 3 1.0 4 1.0 3 4 5 1.0 6 1.0 7 1.0 5 6 7 8 1.0 9 1.0 18 1.0 8 9 10 11 12 1.0 13 1.0 14 1.0 12 13 14 15 1.0 16 1.0 17 1.0 15 16 17 18	C -0.576630 -0.470180 0.337056 C 0.576630 -0.470181 -0.337056 H 0.546299 -0.466710 -1.429757 C 1.949662 -0.460196 0.279495 H 1.863167 -0.510386 1.372564 H 2.496786 -1.363465 -0.030663 C 2.774941 0.774868 -0.120572 H 2.288435 1.696642 0.217456 H 2.887932 0.839161 -1.209645 H -0.546298 -0.466706 1.429757 C -1.949662 -0.460197 -0.279495 H -2.496786 -1.363466 0.030664 H -1.863167 -0.510387 -1.372564 …	60.0411 134.8007 136.1569 184.1027 244.7264 279.7702 406.4367 408.2756 492.0734 785.6495 789.8267 838.7330 911.1349 913.3672 1007.8262 1024.5271 1051.0037 1093.9688 1104.3813 1122.4273 1197.9835 1279.9237 1301.9557 1332.7113 1344.4876 1369.2152 1401.0880 1435.3439 1436.5445 1511.0497 1511.0627 1527.6768 1527.9253 1536.7671 1537.0314 1755.1318 3015.9102 3016.3570 3044.5448 3045.1475 3064.2771 3065…	0	0	0	2	0	2	0	0	0	0	0	0	0	2	0	0	0	0	0	0	0	0	0	0	0	0	0	0	0	0	0	0	0	0	0
71	[CH3][CH2]/[CH]=[CH]/[CH2][CH2]	C6H11	17	-235.181	-235.03	-235.021	-235.137	-234.99	-234.98	36.8105	2	1 2 2.0 10 1.0 11 1.0 2 3 1.0 4 1.0 3 4 5 1.0 6 1.0 7 1.0 5 6 7 8 1.0 9 1.0 17 1.0 8 9 10 11 12 1.0 13 1.0 14 1.0 12 13 14 15 1.0 16 1.0 15 16 17	C 0.642750 -0.438608 -0.351269 C -0.504302 -0.451516 0.332911 H -0.465138 -0.434549 1.425190 C -1.881782 -0.473487 -0.272823 H -1.802972 -0.535495 -1.365765 H -2.409559 -1.382641 0.053032 C -2.725664 0.751533 0.119358 H -2.258575 1.677601 -0.233872 H -2.831175 0.827029 1.208437 H 0.611441 -0.444213 -1.442412 C 2.021610 -0.398618 0.263547 H 2.581948 -1.302750 -0.020276 H 1.919810 -0.449988 1.36349…	60.4086 122.9429 137.0185 146.0099 202.4165 270.1613 400.1020 407.4804 461.1646 502.0187 779.8153 799.5545 838.8886 914.5703 997.1287 1011.3571 1032.5383 1082.9429 1096.5150 1112.9162 1147.8160 1226.9561 1292.0656 1330.2947 1341.4318 1361.7335 1391.2363 1436.0896 1482.9985 1488.4042 1510.9474 1527.8737 1536.8159 1750.3496 2951.2359 3017.1528 3021.7052 3045.2874 3066.2383 3110.8670 3118.9086 3122.…	0	0	0	2	1	1	0	0	0	0	0	0	0	2	0	0	0	0	0	0	0	0	0	0	0	0	0	0	0	0	0	0	0	0	0
72	[CH3]/[CH]=[CH]/[CH][CH2][CH3] or [CH3][CH2]/[CH]=[CH]/[CH][CH3]	C6H11	17	-235.214	-235.062	-235.053	-235.165	-235.016	-235.007	20.1722	2	1 2 1.5 10 1.0 11 1.5 2 3 1.0 4 1.0 3 4 5 1.0 6 1.0 7 1.0 5 6 7 8 1.0 9 1.0 17 1.0 8 9 10 11 12 1.0 13 1.0 12 13 14 1.0 15 1.0 16 1.0 14 15 16 17	C -0.632301 -0.228900 -0.111758 C 0.598558 0.349129 -0.390022 H 0.637563 1.424135 -0.573548 C 1.899684 -0.393152 -0.445203 H 1.722505 -1.463988 -0.280184 H 2.335814 -0.305396 -1.453628 C 2.935224 0.121859 0.573197 H 2.570781 -0.000939 1.599028 H 3.142600 1.187520 0.419011 H -0.647548 -1.305963 0.073377 C -1.846340 0.441583 -0.049989 H -1.853976 1.516384 -0.232692 C -3.160005 -0.207503 0.252103 H …	56.9774 123.5549 161.2427 190.7637 216.1635 259.1616 367.8853 441.5643 492.1554 730.3482 767.4874 794.0627 910.7620 936.6997 988.0022 1025.4457 1038.1781 1078.9285 1097.1569 1177.6296 1222.5190 1276.4174 1305.5791 1323.9127 1361.6839 1433.0520 1438.7088 1471.3685 1503.9799 1508.6137 1524.5230 1527.8773 1536.9025 1554.0631 2995.8635 3010.5254 3044.9327 3046.1956 3060.8176 3107.3414 3111.1549 3119.…	2	0	0	0	0	2	0	1	0	0	0	0	0	1	0	0	0	0.00247875	0	0	0	0	0.0523954	0	0.0995741	0	0	0	0	0	0.0499105	0	0	0	0
73	[CH3][CH2]/[CH]=C/[CH2][CH3]	C6H11	17	-235.174	-235.021	-235.012	-235.129	-234.98	-234.971	43.0466	2	1 2 2.0 10 1.0 2 3 1.0 4 1.0 3 4 5 1.0 6 1.0 7 1.0 5 6 7 8 1.0 9 1.0 17 1.0 8 9 10 11 1.0 12 1.0 13 1.0 11 12 13 14 1.0 15 1.0 16 1.0 14 15 16 17	C 0.586515 -0.440630 -0.239477 C -0.605179 -0.561094 0.305301 H -0.673172 -0.786246 1.381362 C -1.930184 -0.399092 -0.406072 H -1.749499 -0.234722 -1.474299 H -2.500978 -1.335726 -0.322038 C -2.771919 0.751509 0.168417 H -2.253166 1.709742 0.053932 H -2.966711 0.604400 1.237796 C 2.014337 -0.510619 0.130648 H 2.506252 -1.312117 -0.439343 H 2.094472 -0.802690 1.193993 C 2.772112 0.810239 -0.096633…	54.5728 104.2625 147.3150 154.6393 240.4545 270.9230 377.9113 417.8243 463.3084 769.1783 780.1058 808.4163 871.7666 913.3998 1010.4935 1054.3762 1080.7880 1102.2408 1108.4023 1153.8711 1261.8328 1295.7410 1318.4113 1359.1838 1376.4201 1434.7833 1435.5603 1488.4433 1511.3086 1525.6627 1526.9316 1534.8845 1535.9750 1778.5727 2957.3441 3005.4876 3023.7393 3036.5253 3044.5943 3054.5448 3084.0202 3111…	0	0	1	1	0	2	0	0	0	0	0	0	0	2	0	0	0	0	0	0	0	0	0	0	0	0	0	0	0	0	0	0	0	0	0
74	CCC=C(C)C	C6H12	18	-235.857	-235.691	-235.682	-235.811	-235.649	-235.64	-14.547	1	1 2 2.0 11 1.0 15 1.0 2 3 1.0 4 1.0 3 4 5 1.0 6 1.0 7 1.0 5 6 7 8 1.0 9 1.0 10 1.0 8 9 10 11 12 1.0 13 1.0 14 1.0 12 13 14 15 16 1.0 17 1.0 18 1.0 16 17 18	C 0.982593 -0.044702 -0.042745 C -0.235843 -0.529026 -0.329041 H -0.330059 -1.613635 -0.420040 C -1.528231 0.216897 -0.530612 H -1.373639 1.300299 -0.488045 H -1.909457 0.003352 -1.540884 C -2.604889 -0.186002 0.492865 H -2.288253 0.061273 1.512327 H -2.798230 -1.265039 0.458846 H -3.551658 0.329801 0.294441 C 1.314868 1.418099 0.127438 H 0.450454 2.075879 0.011758 H 2.074337 1.731035 -0.602922 H…	54.1512 137.2240 157.7805 212.5762 218.0294 312.2385 360.7581 411.2178 484.2074 513.6447 757.0206 830.9774 868.1936 925.0733 975.0309 1025.4279 1033.6336 1092.9309 1104.5235 1119.1985 1154.0952 1244.2532 1306.3820 1354.2414 1409.1956 1434.6853 1440.7523 1450.5273 1502.4325 1508.9845 1520.6396 1521.5336 1527.4630 1529.4345 1537.9636 1755.4611 3016.7406 3021.4843 3029.9932 3044.2459 3064.6184 3069.…	0	0	0	1	0	3	0	0	0	0	0	1	0	1	0	0	0	0	0	0	0	0	0	0	0	0	0	0	0	0	0	0	0	0	0
75	[CH3][CH2][CH]C(=[CH2])[CH3] or [CH3][CH2]/[CH]=C(\[CH3])/[CH2]	C6H11	17	-235.209	-235.057	-235.048	-235.162	-235.013	-235.005	21.6526	2	1 2 1.5 11 1.0 15 1.5 2 3 1.0 4 1.0 3 4 5 1.0 6 1.0 7 1.0 5 6 7 8 1.0 9 1.0 10 1.0 8 9 10 11 12 1.0 13 1.0 14 1.0 12 13 14 15 16 1.0 17 1.0 16 17	C 1.094088 -0.120254 -0.020665 C -0.195598 -0.584052 -0.304805 H -0.327266 -1.663580 -0.388535 C -1.431219 0.241200 -0.501057 H -1.209502 1.308359 -0.389946 H -1.796754 0.112325 -1.533400 C -2.569552 -0.149494 0.462103 H -2.277424 0.018309 1.504623 H -2.828127 -1.209711 0.356109 H -3.472841 0.438074 0.260940 C 1.366571 1.368536 0.113324 H 0.759830 1.821133 0.906824 H 1.136736 1.906297 -0.814377 H…	33.7086 134.3541 142.8030 209.8390 285.9827 358.6117 445.7609 485.9825 516.8931 567.9428 738.1587 769.2333 796.1293 839.3079 920.0871 996.8572 1018.7592 1064.6071 1073.1472 1091.0883 1175.5042 1288.7067 1303.8242 1357.8840 1400.2422 1433.4088 1446.8048 1483.8933 1508.2489 1522.1277 1527.2173 1530.3895 1536.4981 1545.8019 2991.2110 3045.6878 3047.1736 3084.8255 3100.4734 3113.8106 3119.5309 3129.7…	1	1	0	0	0	2	1	0	0	0	0	0	0	1	0	0	0	0	0.0497871	0	0	0	0.0049575	0.00247875	0	0	0	0	0	0	0.0497871	0	0	0	0
76	[CH2][CH2][CH]=C([CH3])[CH3]	C6H11	17	-235.184	-235.034	-235.024	-235.14	-234.993	-234.984	34.5628	2	1 2 2.0 10 1.0 14 1.0 2 3 1.0 4 1.0 3 4 5 1.0 6 1.0 7 1.0 5 6 7 8 1.0 9 1.0 8 9 10 11 1.0 12 1.0 13 1.0 11 12 13 14 15 1.0 16 1.0 17 1.0 15 16 17	C 0.922940 -0.044426 -0.040858 C -0.292968 -0.545657 -0.307944 H -0.380536 -1.629312 -0.398562 C -1.599373 0.190739 -0.486685 H -1.436757 1.281085 -0.446195 H -1.987646 -0.000742 -1.499469 C -2.636164 -0.212857 0.515977 H -2.354363 -0.421401 1.543359 H -3.694142 -0.169435 0.276021 C 1.240174 1.421390 0.130019 H 0.366076 2.069754 0.034619 H 1.981526 1.746704 -0.613270 H 1.689409 1.606849 1.115734 …	54.6950 130.1377 139.5398 158.1117 213.1899 289.9174 362.3288 407.9693 447.0467 495.5951 515.0142 743.6601 862.8391 868.6495 973.2151 999.2393 1030.6003 1052.9015 1097.8014 1118.7900 1139.4554 1184.9189 1263.7335 1345.8979 1401.0188 1439.3411 1450.0128 1482.2860 1489.7259 1502.3531 1518.5714 1520.3491 1527.5071 1750.8112 2979.4902 3014.8300 3022.4329 3030.9583 3065.9263 3070.8285 3121.3585 3139.4…	0	0	0	1	1	2	0	0	0	0	0	1	0	1	0	0	0	0	0	0	0	0	0	0	0	0	0	0	0	0	0	0	0	0	0
77	[CH3][CH2]C=C([CH3])[CH3]	C6H11	17	-235.178	-235.025	-235.016	-235.132	-234.984	-234.974	40.6004	2	1 2 2.0 10 1.0 14 1.0 2 3 1.0 3 4 1.0 5 1.0 6 1.0 4 5 6 7 1.0 8 1.0 9 1.0 7 8 9 10 11 1.0 12 1.0 13 1.0 11 12 13 14 15 1.0 16 1.0 17 1.0 15 16 17	C 0.995283 -0.061011 -0.050034 C -0.253417 -0.379406 -0.337141 C -1.585659 0.224716 -0.539180 H -1.506457 1.325859 -0.483319 H -1.940329 0.004270 -1.556761 C -2.636993 -0.259652 0.476841 H -2.336101 -0.007894 1.499264 H -2.759879 -1.346419 0.421750 H -3.609420 0.205449 0.279820 C 1.447673 1.372530 0.185317 H 0.626188 2.089061 0.094557 H 2.227414 1.656027 -0.535044 H 1.885059 1.480986 1.187379 C 2…	51.7430 131.8242 170.2580 174.3576 204.2586 263.4247 334.2102 390.8783 487.7288 502.5502 738.5100 804.1336 909.2322 968.5224 974.7783 1019.6591 1089.9301 1097.4281 1108.5318 1168.8665 1200.5766 1289.9768 1356.3229 1421.1655 1433.9608 1437.1666 1488.9259 1503.6229 1513.5455 1519.3512 1522.4226 1525.4344 1534.7082 1786.5339 2957.6452 3023.4281 3029.1395 3031.7865 3053.3687 3070.0198 3075.5664 3122.…	0	0	1	0	0	3	0	0	0	0	0	1	0	1	0	0	0	0	0	0	0	0	0	0	0	0	0	0	0	0	0	0	0	0	0
78	[CH3]/[CH]=[CH]/C([CH3])[CH3] or [CH3][CH][CH]=C([CH3])[CH3]	C6H11	17	-235.218	-235.067	-235.058	-235.169	-235.022	-235.012	16.8858	2	1 2 1.5 10 1.0 14 1.0 2 3 1.0 4 1.5 3 4 5 1.0 6 1.0 5 6 7 1.0 8 1.0 9 1.0 7 8 9 10 11 1.0 12 1.0 13 1.0 11 12 13 14 15 1.0 16 1.0 17 1.0 15 16 17	C 1.010683 -0.048712 0.000000 C -0.327795 -0.446006 0.000002 H -0.499967 -1.524767 0.000007 C -1.464773 0.347846 -0.000003 H -1.367702 1.431861 -0.000010 C -2.860135 -0.195537 0.000000 H -3.428745 0.142631 0.879395 H -2.866798 -1.291274 0.000009 H -3.428744 0.142619 -0.879399 C 1.457623 1.386295 0.000001 H 0.627566 2.096761 0.000000 H 2.082538 1.603672 -0.879343 H 2.082533 1.603670 0.879350 C 2.1…	65.2784 130.6467 146.7654 159.9299 199.1877 237.6086 347.1160 403.3493 427.0153 524.4207 731.3290 819.0786 935.7692 948.2068 980.1340 1011.8462 1039.3349 1063.8903 1081.4683 1116.8645 1232.7865 1272.0816 1359.2304 1428.9212 1435.9448 1443.6593 1448.9133 1497.4271 1504.5039 1508.3760 1513.6753 1516.4403 1542.7842 1558.2639 3002.5509 3009.2997 3014.1583 3037.1118 3044.5956 3047.5961 3106.5890 3113.…	1	0	0	0	0	3	0	1	0	0	1	0	0	0	0	0	0	0	0	0	0	0	0.0500339	0	0.0497871	0	0	0.00247875	0	0	0	0	0	0	0
79	CCCC(=C)C	C6H12	18	-235.853	-235.687	-235.679	-235.809	-235.647	-235.638	-13.3079	1	1 2 2.0 9 1.0 10 1.0 2 3 1.0 11 1.0 3 4 1.0 5 1.0 6 1.0 4 5 6 7 1.0 8 1.0 15 1.0 7 8 9 10 11 12 1.0 13 1.0 14 1.0 12 13 14 15 16 1.0 17 1.0 18 1.0 16 17 18	C -1.946046 -1.175524 -0.210784 C -1.165110 -0.135154 0.099069 C 0.270931 -0.327222 0.541325 H 0.426821 0.184077 1.504457 H 0.455764 -1.393934 0.721982 C 1.319075 0.195180 -0.461929 H 1.167306 1.268654 -0.634430 H 1.160196 -0.298269 -1.429920 H -2.976682 -1.043660 -0.531920 H -1.583821 -2.199418 -0.153838 C -1.673892 1.285180 0.030796 H -1.570905 1.786107 1.003517 H -1.104887 1.886042 -0.690613 H…	60.1486 93.7012 187.7382 191.7658 248.2695 320.5740 400.2174 452.5760 535.5719 722.2365 754.8461 830.0097 891.0837 914.8018 923.5636 995.4381 1024.3567 1051.9929 1077.3033 1125.5818 1141.1579 1269.0045 1311.8617 1328.7617 1344.7462 1402.0396 1439.3953 1441.4637 1473.1522 1505.5014 1515.7163 1524.0623 1527.8465 1529.5158 1540.0890 1735.1953 3007.9336 3032.3103 3039.9027 3041.5250 3058.9537 3077.34…	0	0	0	0	0	2	0	0	0	1	0	1	0	2	0	0	0	0	0	0	0	0	0	0	0	0	0	0	0	0	0	0	0	0	0
80	[CH3][CH2][CH2]C(=[CH])[CH3]	C6H11	17	-235.166	-235.013	-235.004	-235.124	-234.975	-234.966	45.8996	2	1 2 2.0 9 1.0 2 3 1.0 10 1.0 3 4 1.0 5 1.0 6 1.0 4 5 6 7 1.0 8 1.0 14 1.0 7 8 9 10 11 1.0 12 1.0 13 1.0 11 12 13 14 15 1.0 16 1.0 17 1.0 15 16 17	C 1.959519 1.233252 -0.259497 C 1.225798 0.189704 0.071143 C -0.221883 0.356771 0.530610 H -0.342863 -0.147153 1.502370 H -0.431684 1.419689 0.702293 C -1.261060 -0.205488 -0.457603 H -1.077283 -1.274804 -0.623250 H -1.127181 0.285494 -1.430411 H 1.819345 2.307458 -0.301853 C 1.773072 -1.222506 0.023195 H 1.689144 -1.703104 1.007479 H 1.212573 -1.845511 -0.685322 H 2.824274 -1.229975 -0.275915 C …	60.0325 93.9039 182.3107 193.9003 247.4227 313.0328 372.9105 426.8938 523.0281 688.8904 753.1788 807.1030 868.9239 882.6707 931.6106 1016.6317 1045.1592 1057.6790 1122.7765 1136.9497 1213.1016 1277.4133 1317.0153 1340.2463 1398.5406 1433.3804 1440.1094 1504.3721 1514.1191 1517.2032 1523.4498 1529.0737 1539.4002 1703.4369 3010.6820 3035.6613 3041.2920 3043.1843 3063.6023 3081.7173 3086.8778 3109.3…	0	0	0	0	0	2	0	0	1	0	0	1	0	2	0	0	0	0	0	0	0	0	0	0	0	0	0	0	0	0	0	0	0	0	0
81	[CH3][CH][CH2]C(=[CH2])[CH3]	C6H11	17	-235.188	-235.037	-235.028	-235.145	-234.997	-234.988	32.1241	2	1 2 2.0 8 1.0 9 1.0 2 3 1.0 10 1.0 3 4 1.0 5 1.0 6 1.0 4 5 6 7 1.0 14 1.0 7 8 9 10 11 1.0 12 1.0 13 1.0 11 12 13 14 15 1.0 16 1.0 17 1.0 15 16 17	C -2.070639 -1.007263 -0.209805 C -1.145658 -0.091463 0.093088 C 0.256023 -0.485344 0.522435 H 0.477959 -0.038814 1.505972 H 0.285283 -1.578971 0.683205 C 1.323600 -0.073510 -0.449359 H 1.098894 -0.166650 -1.510488 H -3.073087 -0.726346 -0.524012 H -1.860674 -2.072867 -0.153856 C -1.425098 1.389438 0.023848 H -1.292771 1.859288 1.008680 H -0.722979 1.890074 -0.655310 H -2.444048 1.595807 -0.31769…	55.3075 76.5246 115.4388 188.2206 205.6105 330.3611 384.5134 446.4057 458.7781 536.6704 724.0155 823.4424 899.3148 917.9729 925.0489 993.0015 1003.1988 1051.1105 1074.6387 1129.2544 1149.2821 1207.3840 1303.5812 1323.5106 1413.2953 1436.7015 1437.8931 1469.7299 1492.2656 1504.1609 1507.5667 1516.0057 1526.1770 1737.5588 2948.1957 2957.7403 3002.0576 3031.4806 3047.5580 3080.0152 3102.0040 3126.54…	0	0	0	0	0	2	0	0	0	1	0	1	1	1	0	0	0	0	0	0	0	0	0	0	0	0	0	0	0	0	0	0	0	0	0
82	[CH2][CH2][CH2]C(=[CH2])[CH3]	C6H11	17	-235.181	-235.03	-235.021	-235.139	-234.992	-234.982	35.6807	2	1 2 2.0 9 1.0 10 1.0 2 3 1.0 11 1.0 3 4 1.0 5 1.0 6 1.0 4 5 6 7 1.0 8 1.0 15 1.0 7 8 9 10 11 12 1.0 13 1.0 14 1.0 12 13 14 15 16 1.0 17 1.0 16 17	C -1.871623 -1.172992 -0.250729 C -1.099997 -0.137673 0.096911 C 0.330666 -0.335485 0.552390 H 0.479439 0.154033 1.526082 H 0.520225 -1.405164 0.706469 C 1.388369 0.214735 -0.433600 H 1.242044 1.292849 -0.585632 H 1.201906 -0.245925 -1.422092 H -2.898973 -1.037231 -0.580585 H -1.505175 -2.196384 -0.216718 C -1.613915 1.281961 0.061181 H -1.525485 1.756036 1.048564 H -1.038494 1.905188 -0.635924 H…	60.6916 92.5208 116.6646 187.9614 193.6156 324.4285 398.6997 443.9204 474.3601 537.6257 720.5539 754.0779 826.9130 903.8589 924.5159 986.5552 1003.3002 1034.6357 1080.3811 1085.2545 1123.1817 1196.6242 1298.2265 1310.4104 1337.1790 1394.3042 1441.0618 1472.9332 1486.8959 1498.2695 1510.0370 1520.3482 1528.3624 1735.2214 2945.2555 3024.1616 3032.9201 3045.7902 3077.3890 3079.9942 3125.4523 3154.18…	0	0	0	0	1	1	0	0	0	1	0	1	0	2	0	0	0	0	0	0	0	0	0	0	0	0	0	0	0	0	0	0	0	0	0
83	[CH3][CH2][CH2]C(=[CH2])[CH2]	C6H11	17	-235.205	-235.053	-235.044	-235.159	-235.01	-235.001	23.7648	2	1 2 1.5 9 1.0 10 1.0 2 3 1.0 11 1.5 3 4 1.0 5 1.0 6 1.0 4 5 6 7 1.0 8 1.0 14 1.0 7 8 9 10 11 12 1.0 13 1.0 12 13 14 15 1.0 16 1.0 17 1.0 15 16 17	C -1.835939 -1.213300 -0.105847 C -1.200142 0.000001 0.132804 C 0.237566 0.000013 0.632569 H 0.407355 0.879530 1.267484 H 0.407360 -0.879479 1.267517 C 1.269412 -0.000002 -0.511288 H 1.096198 0.877512 -1.148430 H 1.096197 -0.877530 -1.148411 H -2.848874 -1.251842 -0.496315 H -1.344459 -2.161419 0.090712 C -1.835954 1.213290 -0.105859 H -1.344489 2.161413 0.090711 H -2.848885 1.251809 -0.496338 C …	41.4001 96.2299 187.6494 245.7361 322.9597 406.9543 454.6484 545.2085 553.8237 591.8557 755.1979 757.9888 793.5144 869.2404 888.1818 924.3163 993.8662 1049.8351 1059.9499 1101.3522 1122.4199 1258.9043 1317.8387 1333.5025 1378.3443 1389.3695 1407.8583 1440.3609 1514.6424 1516.3951 1526.3155 1529.2340 1540.9281 1556.0805 3033.2983 3039.5790 3043.6936 3060.4066 3082.0613 3107.2838 3111.7658 3161.293…	0	1	0	0	0	1	2	0	0	0	0	0	0	2	0	0	0	0	0	0	0	0	0	0	0	0	0	0	0	0	0	0	0	0	0
84	C/C=C/C(C)C	C6H12	18	-235.855	-235.689	-235.68	-235.81	-235.648	-235.639	-14.0063	1	1 2 2.0 8 1.0 10 1.0 2 3 1.0 9 1.0 3 4 1.0 5 1.0 15 1.0 4 5 6 1.0 7 1.0 14 1.0 6 7 8 9 10 11 1.0 12 1.0 13 1.0 11 12 13 14 15 16 1.0 17 1.0 18 1.0 16 17 18	C -1.514743 0.000015 -0.421307 C -0.373646 -0.000026 0.272447 C 1.014985 0.000006 -0.318290 H 0.919072 0.000036 -1.413507 C 1.787626 1.267465 0.093857 H 1.897062 1.321920 1.184748 H 1.266367 2.173047 -0.235033 H -1.464254 0.000072 -1.512328 H -0.419994 -0.000084 1.365301 C -2.894296 -0.000010 0.174254 H -2.859527 -0.000079 1.269148 H -3.468104 0.880419 -0.146265 H -3.468121 -0.880388 -0.146375 H …	81.4726 159.0853 195.2128 212.8328 231.2062 269.1044 323.0454 419.1383 459.8024 485.8657 812.4059 849.1482 919.4098 939.1989 970.6969 996.8766 1014.8191 1078.6315 1096.4181 1127.7873 1197.0734 1210.4607 1302.9592 1343.2186 1356.3321 1394.9813 1423.1603 1441.6082 1444.4630 1510.1865 1518.4632 1520.1752 1523.0620 1531.5399 1539.7810 1756.9302 3026.0771 3028.6402 3036.2014 3040.7962 3073.6416 3098.1…	0	0	0	2	0	3	0	0	0	0	0	0	0	0	0	1	0	0	0	0	0	0	0	0	0	0	0	0	0	0	0	0	0	0	0
85	[CH3]/[CH]=C/[CH]([CH3])[CH3]	C6H11	17	-235.174	-235.023	-235.013	-235.13	-234.982	-234.973	41.6813	2	1 2 2.0 8 1.0 9 1.0 2 3 1.0 3 4 1.0 5 1.0 14 1.0 4 5 6 1.0 7 1.0 13 1.0 6 7 8 9 10 1.0 11 1.0 12 1.0 10 11 12 13 14 15 1.0 16 1.0 17 1.0 15 16 17	C 1.577950 0.000000 0.446602 C 0.375679 0.000000 -0.088673 C -1.048201 0.000000 0.319495 H -1.068550 0.000000 1.426394 C -1.773569 1.271869 -0.163949 H -1.779717 1.320815 -1.258918 H -1.280095 2.174312 0.211261 H 1.662681 0.000000 1.543840 C 2.885112 0.000000 -0.307493 H 2.717314 -0.000001 -1.388319 H 3.487368 0.882144 -0.052451 H 3.487369 -0.882143 -0.052450 H -2.813484 1.276791 0.183050 C -1.77…	84.9973 123.6472 147.7494 197.6560 226.2323 259.7014 322.9230 438.6234 466.5955 468.6340 757.2449 799.1390 901.8732 938.9225 972.1512 1006.6831 1068.9715 1081.8979 1125.5755 1153.7984 1204.9585 1273.7262 1329.8183 1362.5018 1421.9672 1432.0718 1443.2200 1514.1981 1517.0110 1519.0382 1520.1314 1529.2045 1539.4301 1779.6507 2932.6708 3015.4611 3034.5807 3046.0740 3050.1249 3081.1557 3113.0326 3117.…	0	0	1	1	0	3	0	0	0	0	0	0	0	0	0	1	0	0	0	0	0	0	0	0	0	0	0	0	0	0	0	0	0	0	0
86	[CH2]=[CH][CH][CH]([CH3])[CH3] or [CH2]/[CH]=[CH]/[CH]([CH3])[CH3]	C6H11	17	-235.208	-235.056	-235.048	-235.162	-235.013	-235.004	21.7638	2	1 2 1.5 8 1.0 10 1.5 2 3 1.0 9 1.0 3 4 1.0 5 1.0 14 1.0 4 5 6 1.0 7 1.0 13 1.0 6 7 8 9 10 11 1.0 12 1.0 11 12 13 14 15 1.0 16 1.0 17 1.0 15 16 17	C -1.630774 0.000004 -0.394143 C -0.433693 0.000001 0.308822 C 0.934313 0.000001 -0.313475 H 0.813993 0.000002 -1.406367 C 1.721711 1.267735 0.078739 H 1.859647 1.320507 1.166138 H 1.195309 2.175032 -0.236421 H -1.567117 0.000010 -1.484113 H -0.472422 -0.000003 1.400181 C -2.895644 -0.000001 0.172614 H -3.030444 -0.000007 1.251068 H -3.791612 0.000003 -0.439044 H 2.715994 1.269037 -0.384452 C 1.7…	62.1215 155.2173 199.2394 230.5953 270.9007 323.9234 393.9732 458.0151 488.7978 548.7425 755.7987 796.8637 844.6049 925.7830 939.1655 966.7524 1002.5943 1017.2821 1109.7181 1173.5748 1206.6180 1223.6884 1285.4733 1305.2654 1352.0965 1405.3974 1421.1670 1441.1342 1516.2754 1517.6445 1518.9265 1532.1700 1538.9636 1545.0063 3025.7572 3037.4554 3041.7864 3100.2935 3106.8485 3118.2808 3119.7376 3130.2…	1	0	0	0	0	2	1	1	0	0	0	0	0	0	0	1	0	0	0	0	0	0	0.0049575	0.00247875	0.0497871	0	0	0	0	0	0	0	0.0497871	0	0
87	[CH3]/[CH]=[CH]/[C@@H]([CH2])[CH3]	C6H11	17	-235.182	-235.031	-235.022	-235.139	-234.992	-234.983	35.4006	2	1 2 2.0 7 1.0 9 1.0 2 3 1.0 8 1.0 3 4 1.0 5 1.0 14 1.0 4 5 6 1.0 13 1.0 6 7 8 9 10 1.0 11 1.0 12 1.0 10 11 12 13 14 15 1.0 16 1.0 17 1.0 15 16 17	C 1.468760 -0.007541 -0.412735 C 0.325443 0.025560 0.278536 C -1.067146 -0.058045 -0.323521 H -0.949911 -0.073063 -1.417629 C -1.718497 -1.340221 0.106041 H -1.399303 -2.285176 -0.323314 H 1.421168 -0.085730 -1.500974 H 0.360170 0.097599 1.367848 C 2.845658 0.056686 0.184955 H 2.806856 0.137268 1.276658 H 3.432493 -0.837297 -0.067719 H 3.408389 0.918633 -0.198917 H -2.329716 -1.376632 1.004296 C …	85.6589 139.7765 160.5272 202.5447 214.4155 255.1125 310.5744 396.4192 444.6046 485.6958 551.4234 811.1007 855.3438 916.3367 934.6267 987.7506 1011.6450 1076.7094 1084.3201 1103.4188 1177.0327 1187.5780 1276.2282 1339.2127 1352.0421 1371.7323 1429.7524 1441.9363 1482.3782 1509.8543 1521.9778 1525.1755 1528.3348 1739.1088 3011.8610 3028.3818 3042.6611 3073.3689 3107.6661 3112.4315 3122.5410 3129.7…	0	0	0	2	1	2	0	0	0	0	0	0	0	0	0	1	0	0	0	0	0	0	0	0	0	0	0	0	0	0	0	0	0	0	0
88	[CH3]/C=[CH]/[CH]([CH3])[CH3]	C6H11	17	-235.175	-235.023	-235.014	-235.131	-234.983	-234.974	41.1173	2	1 2 2.0 9 1.0 2 3 1.0 8 1.0 3 4 1.0 5 1.0 14 1.0 4 5 6 1.0 7 1.0 13 1.0 6 7 8 9 10 1.0 11 1.0 12 1.0 10 11 12 13 14 15 1.0 16 1.0 17 1.0 15 16 17	C -1.538630 0.000000 -0.291026 C -0.378959 0.000000 0.328501 C 0.987971 0.000000 -0.330509 H 0.834576 0.000000 -1.417205 C 1.773026 1.268784 0.047767 H 1.927911 1.325165 1.133134 H 1.235923 2.172148 -0.260818 H -0.363996 0.000001 1.430599 C -2.981858 0.000000 0.004154 H -3.165656 0.000001 1.092412 H -3.480314 0.883583 -0.415071 H -3.480314 -0.883583 -0.415070 H 2.760293 1.276245 -0.430112 C 1.773…	72.6759 140.6971 161.6198 228.1750 234.9927 261.0958 320.0054 382.5102 405.9799 471.7395 798.3830 831.3097 907.8331 940.2160 970.8917 1002.1239 1050.7022 1062.0157 1129.2767 1168.5707 1197.7230 1277.4091 1360.1269 1373.1309 1422.9501 1426.6291 1442.8900 1488.0478 1506.5308 1518.3135 1519.4844 1530.5904 1538.9277 1782.2689 2981.4369 2998.3371 3035.8316 3040.1469 3047.9507 3063.6123 3087.9637 3097.…	0	0	1	1	0	3	0	0	0	0	0	0	0	0	0	1	0	0	0	0	0	0	0	0	0	0	0	0	0	0	0	0	0	0	0
89	C=CCC(C)C	C6H12	18	-235.849	-235.683	-235.674	-235.806	-235.644	-235.636	-11.8225	1	1 2 2.0 8 1.0 9 1.0 2 3 1.0 7 1.0 3 4 1.0 5 1.0 10 1.0 4 5 6 1.0 11 1.0 15 1.0 6 7 8 9 10 11 12 1.0 13 1.0 14 1.0 12 13 14 15 16 1.0 17 1.0 18 1.0 16 17 18	C -2.648968 0.127669 0.263388 C -1.598823 -0.336434 -0.415620 C -0.291346 -0.775329 0.185351 H -0.139933 -1.843514 -0.034885 C 0.938035 0.002868 -0.342779 H 0.924862 -0.065524 -1.441803 H -1.667501 -0.414953 -1.502940 H -3.569300 0.422728 -0.233978 H -2.630317 0.225317 1.347270 H -0.336689 -0.685436 1.279931 C 2.239337 -0.643139 0.152947 H 2.309898 -1.692871 -0.156672 H 3.117583 -0.117195 -0.2396…	84.7538 100.0658 218.2923 232.4291 259.3265 343.6366 388.7333 429.0341 449.4760 635.3401 835.3855 892.1512 929.4859 938.1209 946.5561 974.7836 983.5201 1037.1053 1066.1165 1143.7178 1202.7130 1210.1943 1276.4021 1316.5394 1343.0539 1383.9821 1390.3256 1429.5799 1448.2357 1475.4460 1506.8873 1518.9112 1525.0915 1534.0702 1539.7193 1731.4595 3005.3834 3009.0292 3035.1993 3040.7240 3056.3195 3097.55…	0	0	0	1	0	2	0	0	0	1	0	0	0	1	0	1	0	0	0	0	0	0	0	0	0	0	0	0	0	0	0	0	0	0	0
90	[CH2]=[CH][CH2]C([CH3])[CH3]	C6H11	17	-235.188	-235.037	-235.028	-235.144	-234.997	-234.987	32.5277	2	1 2 2.0 7 1.0 8 1.0 2 3 1.0 6 1.0 3 4 1.0 5 1.0 9 1.0 4 5 10 1.0 14 1.0 6 7 8 9 10 11 1.0 12 1.0 13 1.0 11 12 13 14 15 1.0 16 1.0 17 1.0 15 16 17	C -2.657404 0.130368 0.095908 C -1.537368 -0.366265 -0.430895 C -0.300932 -0.748126 0.349329 H -0.113893 -1.824136 0.217148 C 0.936497 0.016401 -0.055413 H -1.473846 -0.512044 -1.510215 H -3.517186 0.384326 -0.518639 H -2.759509 0.296625 1.166834 H -0.510782 -0.607972 1.426457 C 2.257473 -0.688122 -0.085498 H 2.163437 -1.721825 -0.440962 H 2.978032 -0.169386 -0.731239 H 2.724475 -0.741579 0.91658…	39.6938 94.6269 115.6389 129.0526 206.1767 310.4560 346.5694 409.0791 431.8459 628.7975 797.5376 899.5064 934.3699 940.4128 956.3087 1000.5001 1005.1625 1035.7249 1054.1127 1125.4717 1222.6544 1276.8310 1305.3807 1333.8388 1368.2673 1427.3205 1444.4980 1469.9277 1492.6874 1501.2139 1508.9487 1514.8321 1524.1722 1725.9895 2944.2053 2945.7663 2953.8405 3031.5935 3050.0467 3055.0312 3096.7634 3112.6…	0	0	0	1	0	2	0	0	0	1	0	0	0	1	1	0	0	0	0	0	0	0	0	0	0	0	0	0	0	0	0	0	0	0	0
91	[CH]=[CH][CH2][CH]([CH3])[CH3]	C6H11	17	-235.162	-235.01	-235.002	-235.122	-234.974	-234.965	46.5291	2	1 2 2.0 8 1.0 2 3 1.0 7 1.0 3 4 1.0 5 1.0 9 1.0 4 5 6 1.0 10 1.0 14 1.0 6 7 8 9 10 11 1.0 12 1.0 13 1.0 11 12 13 14 15 1.0 16 1.0 17 1.0 15 16 17	C 2.683716 0.146434 -0.330305 C 1.666784 -0.332349 0.349308 C 0.338924 -0.775260 -0.223801 H 0.200604 -1.843030 0.003059 C -0.872032 0.006278 0.337341 H -0.825960 -0.055723 1.435962 H 1.759719 -0.428373 1.441520 H 3.685160 0.500130 -0.117802 H 0.363120 -0.683416 -1.316852 C -2.186534 -0.644277 -0.116332 H -2.247363 -1.691970 0.202059 H -3.053044 -0.116064 0.298601 H -2.277444 -0.621983 -1.210161 …	85.8041 99.4943 221.9202 234.2473 259.7586 343.7399 393.6443 418.0908 447.0485 643.5607 795.1507 809.9253 849.4558 912.8189 942.1706 953.9951 976.8303 1039.5554 1139.1630 1160.7329 1203.2838 1251.0825 1293.1221 1329.4709 1382.5564 1390.7814 1429.5597 1448.4642 1505.1143 1518.6704 1524.7747 1533.9057 1539.4109 1694.0461 3004.2426 3017.2075 3021.9190 3036.0859 3042.0802 3078.6896 3098.7759 3104.628…	0	0	0	1	0	2	0	0	1	0	0	0	0	1	0	1	0	0	0	0	0	0	0	0	0	0	0	0	0	0	0	0	0	0	0
92	[CH2]=C[CH2][CH]([CH3])[CH3]	C6H11	17	-235.17	-235.019	-235.01	-235.128	-234.98	-234.971	42.6653	2	1 2 2.0 7 1.0 8 1.0 2 3 1.0 3 4 1.0 5 1.0 9 1.0 4 5 6 1.0 10 1.0 14 1.0 6 7 8 9 10 11 1.0 12 1.0 13 1.0 11 12 13 14 15 1.0 16 1.0 17 1.0 15 16 17	C -2.760161 0.092666 0.090083 C -1.601308 -0.353867 -0.338157 C -0.290867 -0.804376 0.167389 H -0.143103 -1.860272 -0.103150 C 0.914709 0.017473 -0.355919 H 0.875740 -0.012983 -1.454087 H -3.577176 0.344411 -0.585472 H -2.967916 0.232571 1.158241 H -0.296372 -0.769701 1.274036 C 2.232417 -0.626350 0.095230 H 2.314034 -1.662942 -0.253453 H 3.094182 -0.072482 -0.294721 H 2.311652 -0.634580 1.190263…	88.3905 92.5649 216.8748 234.9967 256.7771 329.3982 353.6995 383.5251 434.8000 542.9930 822.3977 866.7847 881.8028 922.8297 945.3965 965.0006 978.4472 1029.2324 1140.4617 1157.7528 1202.1804 1259.1742 1315.7339 1378.6488 1385.8322 1429.7982 1444.4147 1448.5087 1481.9041 1519.2115 1523.0656 1533.5454 1539.7574 1758.3369 2941.9654 3026.6260 3035.5946 3037.6824 3041.7633 3055.5105 3098.7630 3104.541…	0	0	1	0	0	2	0	0	0	1	0	0	0	1	0	1	0	0	0	0	0	0	0	0	0	0	0	0	0	0	0	0	0	0	0
93	[CH2]=[CH][CH2][C@H]([CH3])[CH2]	C6H11	17	-235.176	-235.026	-235.017	-235.136	-234.989	-234.98	37.2114	2	1 2 2.0 8 1.0 9 1.0 2 3 1.0 7 1.0 3 4 1.0 5 1.0 10 1.0 4 5 6 1.0 11 1.0 15 1.0 6 7 8 9 10 11 12 1.0 13 1.0 14 1.0 12 13 14 15 16 1.0 17 1.0 16 17	C -2.629110 0.120222 0.269508 C -1.571925 -0.311554 -0.420315 C -0.264020 -0.754605 0.174521 H -0.091280 -1.810444 -0.083624 C 0.957793 0.061832 -0.324887 H 0.958582 -0.016718 -1.430880 H -1.634122 -0.354029 -1.509849 H -3.550179 0.422856 -0.221836 H -2.615577 0.180896 1.356114 H -0.313145 -0.698799 1.269886 C 2.275478 -0.565371 0.166601 H 2.373656 -1.601179 -0.179287 H 3.140421 -0.003090 -0.2038…	93.4166 103.9590 158.5149 220.0764 250.7100 343.5662 386.6966 420.2203 434.6611 519.6476 636.7997 852.0133 889.5275 936.5002 941.1159 951.9176 989.3183 1029.8607 1042.8840 1121.9181 1149.3934 1198.4610 1248.6502 1305.5009 1339.4125 1356.5099 1368.2981 1431.6850 1474.5773 1483.7212 1509.4327 1525.8970 1531.2080 1730.3369 2906.7637 3015.9810 3042.7268 3069.1553 3110.9692 3112.2730 3132.2474 3155.23…	0	0	0	1	1	1	0	0	0	1	0	0	0	1	0	1	0	0	0	0	0	0	0	0	0	0	0	0	0	0	0	0	0	0	0
94	C=C[C@H](C)CC	C6H12	18	-235.849	-235.683	-235.674	-235.806	-235.644	-235.635	-11.541	1	1 2 2.0 8 1.0 9 1.0 2 3 1.0 7 1.0 3 4 1.0 5 1.0 15 1.0 4 5 6 1.0 10 1.0 14 1.0 6 7 8 9 10 11 1.0 12 1.0 13 1.0 11 12 13 14 15 16 1.0 17 1.0 18 1.0 16 17 18	C 1.756378 -1.456976 -0.150812 C 1.047993 -0.488443 0.431200 C 0.143900 0.491591 -0.275014 H 0.162123 0.259774 -1.350325 C -1.317845 0.369271 0.214697 H -1.344891 0.551359 1.299268 H 1.113905 -0.362128 1.515056 H 2.397860 -2.122385 0.421314 H 1.724247 -1.620887 -1.226377 C -1.973967 -0.978597 -0.098554 H -1.423897 -1.806816 0.360786 H -3.005488 -1.010107 0.270389 H -2.001627 -1.161363 -1.180066 H…	90.7623 107.6081 223.2080 227.5510 243.8692 313.3404 334.3172 415.1671 497.7057 694.0250 771.5927 828.7617 906.7360 937.9912 980.3370 1017.7743 1035.4020 1039.0174 1041.1113 1120.1548 1187.3620 1223.3738 1297.7961 1333.4855 1334.8741 1367.3775 1392.8506 1433.9585 1441.1723 1479.5770 1515.1862 1526.3461 1528.1423 1531.3604 1537.6896 1729.1857 3016.6692 3024.4022 3040.3220 3045.3991 3057.7639 3103.…	0	0	0	1	0	2	0	0	0	1	0	0	0	1	0	1	0	0	0	0	0	0	0	0	0	0	0	0	0	0	0	0	0	0	0
95	[CH2]=[CH][C@H]([CH3])[CH2][CH2]	C6H11	17	-235.176	-235.026	-235.017	-235.136	-234.989	-234.98	37.1426	2	1 2 2.0 8 1.0 9 1.0 2 3 1.0 7 1.0 3 4 1.0 5 1.0 14 1.0 4 5 6 1.0 10 1.0 13 1.0 6 7 8 9 10 11 1.0 12 1.0 11 12 13 14 15 1.0 16 1.0 17 1.0 15 16 17	C 1.923014 -1.194922 -0.150197 C 1.063530 -0.355593 0.429466 C 0.031034 0.479056 -0.285684 H 0.098176 0.262702 -1.360763 C -1.403931 0.120798 0.181890 H -1.467620 0.328139 1.268898 H 1.090133 -0.234759 1.515451 H 2.650794 -1.760067 0.426407 H 1.934203 -1.346590 -1.227914 C -1.815623 -1.282378 -0.106677 H -1.083252 -2.083082 -0.116636 H -2.865731 -1.551034 -0.164396 H -2.114055 0.822533 -0.280262 …	93.9756 127.7545 149.4849 228.8211 247.0465 306.7804 326.0199 414.7910 472.0387 497.3438 696.3152 760.9527 878.7953 909.6254 939.2335 1001.1186 1016.1995 1040.2526 1064.9816 1106.4370 1125.0466 1197.8708 1248.5526 1330.0529 1332.5565 1357.9501 1382.0554 1433.8067 1477.8405 1483.3967 1495.4363 1525.8026 1529.9875 1728.2263 2922.5143 3027.3414 3039.2944 3040.7563 3103.8204 3120.5543 3123.3678 3154.…	0	0	0	1	1	1	0	0	0	1	0	0	0	1	0	1	0	0	0	0	0	0	0	0	0	0	0	0	0	0	0	0	0	0	0
96	[CH2]=C[C@H]([CH3])[CH2][CH3]	C6H11	17	-235.17	-235.018	-235.009	-235.128	-234.979	-234.97	43.2248	2	1 2 2.0 7 1.0 8 1.0 2 3 1.0 3 4 1.0 5 1.0 14 1.0 4 5 6 1.0 9 1.0 13 1.0 6 7 8 9 10 1.0 11 1.0 12 1.0 10 11 12 13 14 15 1.0 16 1.0 17 1.0 15 16 17	C -1.905448 -1.402303 0.011350 C -1.075297 -0.442840 -0.329215 C -0.119805 0.516334 0.268920 H -0.116498 0.337917 1.362276 C 1.322982 0.292038 -0.245082 H 1.333397 0.440174 -1.333253 H -2.512482 -1.938334 -0.717763 H -2.032999 -1.714814 1.055229 C 1.900720 -1.083119 0.098450 H 1.291230 -1.886277 -0.329059 H 2.920844 -1.188024 -0.287586 H 1.938050 -1.236343 1.184326 H 1.959710 1.078083 0.182589 C …	90.4276 107.2016 211.4791 226.8956 237.5947 280.1571 317.3473 404.7289 475.5277 599.0579 749.5616 818.4867 881.5622 898.1699 969.5307 995.8746 1029.6460 1037.2676 1116.0705 1162.3890 1189.3487 1288.5624 1312.5730 1352.4605 1384.9372 1433.1376 1440.8958 1447.7128 1514.0621 1524.1273 1527.9885 1530.8672 1537.4267 1754.5613 2925.7348 3035.4928 3046.0457 3050.2247 3055.8664 3070.5931 3109.6480 3118.0…	0	0	1	0	0	2	0	0	0	1	0	0	0	1	0	1	0	0	0	0	0	0	0	0	0	0	0	0	0	0	0	0	0	0	0
97	[CH2]=[CH][C@H]([CH2])[CH2][CH3]	C6H11	17	-235.176	-235.025	-235.016	-235.135	-234.988	-234.979	37.8863	2	1 2 2.0 8 1.0 9 1.0 2 3 1.0 7 1.0 3 4 1.0 5 1.0 15 1.0 4 5 6 1.0 10 1.0 14 1.0 6 7 8 9 10 11 1.0 12 1.0 13 1.0 11 12 13 14 15 16 1.0 17 1.0 16 17	C 1.859573 -1.308446 -0.123274 C 1.060118 -0.406538 0.449796 C 0.123576 0.535399 -0.287533 H 0.172420 0.276454 -1.356831 C -1.339169 0.378798 0.187446 H -1.382154 0.581729 1.267631 H 1.072960 -0.289497 1.535023 H 2.524920 -1.938115 0.461807 H 1.879818 -1.451129 -1.202048 C -1.944399 -0.996714 -0.105705 H -1.370289 -1.796786 0.373819 H -2.977277 -1.056767 0.255469 H -1.956548 -1.200331 -1.183694 H…	95.1071 107.4882 131.4021 219.3779 243.4360 295.1433 325.8505 418.8541 482.6232 535.1251 695.1044 770.6164 827.2283 920.9239 931.4380 978.9564 1028.1935 1035.9380 1049.6664 1102.7674 1165.7970 1195.1623 1290.1057 1315.3057 1331.6346 1344.6430 1393.9054 1440.8960 1468.7777 1481.7421 1518.7063 1527.4473 1537.1981 1711.8137 3003.4499 3027.0295 3046.3048 3065.9059 3109.0446 3122.6950 3137.0904 3155.1…	0	0	0	1	1	1	0	0	0	1	0	0	0	1	0	1	0	0	0	0	0	0	0	0	0	0	0	0	0	0	0	0	0	0	0
98	[CH]=[CH][C@H]([CH3])[CH2][CH3]	C6H11	17	-235.162	-235.01	-235.001	-235.122	-234.973	-234.965	46.6907	2	1 2 2.0 8 1.0 2 3 1.0 7 1.0 3 4 1.0 5 1.0 14 1.0 4 5 6 1.0 9 1.0 13 1.0 6 7 8 9 10 1.0 11 1.0 12 1.0 10 11 12 13 14 15 1.0 16 1.0 17 1.0 15 16 17	C 1.558930 -1.706618 -0.238662 C 1.013823 -0.677700 0.367670 C 0.232153 0.444096 -0.292159 H 0.199098 0.241404 -1.370858 C -1.219397 0.498194 0.234366 H -1.196812 0.641553 1.324915 H 1.121334 -0.583208 1.459516 H 2.142398 -2.576428 0.037130 C -2.057622 -0.736892 -0.107720 H -1.613464 -1.648010 0.306948 H -3.075232 -0.644174 0.288466 H -2.133319 -0.872648 -1.193651 H -1.702304 1.394047 -0.179920 C…	91.4105 107.1059 224.0121 229.6237 246.1884 323.8166 336.9677 420.0958 491.2266 677.8335 742.1978 805.2790 837.0084 865.9531 936.1223 994.1100 1028.7592 1037.3972 1118.5574 1170.9077 1186.2261 1257.9342 1309.9617 1336.3107 1374.1965 1393.7040 1434.1605 1441.6090 1514.3283 1525.6338 1527.8002 1530.2210 1537.0082 1689.8680 3010.6966 3020.7817 3039.0951 3043.6884 3046.8432 3059.7006 3104.1818 3109.7…	0	0	0	1	0	2	0	0	1	0	0	0	0	1	0	1	0	0	0	0	0	0	0	0	0	0	0	0	0	0	0	0	0	0	0
99	[CH2]=[CH][C@H]([CH3])[CH][CH3]	C6H11	17	-235.183	-235.032	-235.023	-235.141	-234.993	-234.984	34.5831	2	1 2 2.0 7 1.0 8 1.0 2 3 1.0 6 1.0 3 4 1.0 5 1.0 14 1.0 4 5 9 1.0 13 1.0 6 7 8 9 10 1.0 11 1.0 12 1.0 10 11 12 13 14 15 1.0 16 1.0 17 1.0 15 16 17	C -1.662079 -1.539521 0.140690 C -1.091295 -0.474640 -0.425960 C -0.144141 0.489201 0.267202 H -0.119982 0.217046 1.333551 C 1.241574 0.324241 -0.298331 H -1.275416 -0.265028 -1.481490 H -2.315037 -2.205249 -0.417914 H -1.502329 -1.783739 1.189288 C 2.125321 -0.806289 0.112169 H 1.769327 -1.774518 -0.282146 H 3.151613 -0.669628 -0.245746 H 2.158300 -0.916546 1.205555 H 1.481880 0.871265 -1.209349…	61.2719 81.5984 116.9259 231.6781 241.1211 286.1784 309.7733 397.6254 464.7819 510.2475 692.0818 825.5363 893.7862 929.1005 985.2518 1005.6009 1019.6584 1035.3017 1059.9938 1136.0291 1183.6426 1195.1424 1295.3895 1329.2870 1334.2446 1411.1671 1430.6540 1437.6241 1470.6090 1503.5935 1515.8600 1524.8538 1527.4466 1713.5253 2974.6125 3009.9586 3042.7817 3043.5098 3107.2643 3108.0883 3122.5057 3135.0…	0	0	0	1	0	2	0	0	0	1	0	0	1	0	0	1	0	0	0	0	0	0	0	0	0	0	0	0	0	0	0	0	0	0	0
100	[CH3][CH2]C(=[CH2])[CH][CH3] or [CH3]/[CH]=C(/[CH2])\[CH2][CH3]	C6H11	17	-235.208	-235.056	-235.048	-235.162	-235.013	-235.005	21.6649	2	1 2 1.5 7 1.0 14 1.0 2 3 1.0 11 1.5 3 4 1.0 5 1.0 9 1.0 4 5 6 1.0 8 1.0 10 1.0 6 7 8 9 10 11 12 1.0 13 1.0 12 13 14 15 1.0 16 1.0 17 1.0 15 16 17	C 1.261455 0.469779 -0.149818 C -0.093550 0.688380 0.117517 C -0.986297 -0.427723 0.644350 H -1.846410 0.018901 1.156973 C -1.494678 -1.365240 -0.464012 H -2.062388 -0.805335 -1.215533 H 1.825471 1.313608 -0.547314 H -0.665164 -1.861916 -0.979570 H -0.454055 -1.015393 1.402227 H -2.149494 -2.141747 -0.051474 C -0.663658 1.932737 -0.120794 H -1.710408 2.128990 0.089909 H -0.078933 2.753181 -0.5276…	66.8404 107.9375 192.8924 215.3425 237.9120 308.5406 422.5877 524.5877 557.0265 605.2484 733.8679 767.8973 782.9826 805.0046 913.9755 1012.3094 1031.5239 1043.0045 1093.5204 1100.0822 1156.8339 1269.4203 1335.8915 1355.6531 1410.4523 1437.7421 1441.0760 1470.5406 1506.5122 1519.1488 1527.3136 1534.9172 1543.9167 1547.8345 3011.5235 3046.7479 3048.2151 3051.5637 3082.0803 3115.4996 3121.6492 3128.…	1	1	0	0	0	2	1	0	0	0	0	0	0	1	0	0	0	0	0.0497871	0	0	0	0.0499105	0.00247875	0	0	0	0	0	0	0.00247875	0	0	0	0
101	[CH3]/[CH]=C(\[CH3])/[CH][CH3] or [CH3]/[CH]=C(/[CH3])\[CH][CH3]	C6H11	17	-235.213	-235.062	-235.052	-235.166	-235.018	-235.009	19.1134	2	1 2 1.5 6 1.0 14 1.0 2 3 1.5 10 1.0 3 4 1.0 8 1.0 4 5 1.0 7 1.0 9 1.0 5 6 7 8 9 10 11 1.0 12 1.0 13 1.0 11 12 13 14 15 1.0 16 1.0 17 1.0 15 16 17	C 1.412559 0.457037 -0.000003 C 0.016596 0.407022 -0.000001 C -0.674607 -0.803890 0.000000 C -2.161526 -0.981075 0.000000 H -2.702931 -0.031093 0.000003 H 1.882901 1.437706 -0.000004 H -2.495062 -1.553935 -0.878541 H -0.091843 -1.722712 -0.000001 H -2.495061 -1.553941 0.878537 C -0.745857 1.722288 0.000001 H -1.390713 1.818980 -0.882036 H -1.390710 1.818977 0.882041 H -0.058505 2.573640 0.000001 …	52.1973 71.1095 136.6279 175.8375 216.0325 234.5187 311.1891 464.6709 488.8270 569.8039 660.4671 738.4066 775.1495 942.1708 1022.8959 1029.4707 1032.5208 1065.0019 1070.2765 1119.4206 1163.3451 1297.3280 1310.1700 1433.0340 1436.0697 1445.4622 1467.6346 1505.4641 1511.9517 1512.2551 1523.2618 1523.8101 1533.6853 1548.2450 3011.3180 3014.7238 3043.5603 3044.0793 3052.3297 3095.9652 3119.5695 3124.…	2	1	0	0	0	3	0	0	0	0	0	0	0	0	0	0	0	0.00247875	0.0995741	0	0	0	0.104778	0	0	0	0	0	0	0	0	0	0	0	0
102	[CH](=[CH2])C([CH2][CH3])[CH3] or [CH2]/[CH]=C(/[CH3])\[CH2][CH3]	C6H11	17	-235.212	-235.059	-235.05	-235.165	-235.016	-235.008	19.799	2	1 2 1.5 7 1.0 15 1.5 2 3 1.0 11 1.0 3 4 1.0 5 1.0 9 1.0 4 5 6 1.0 8 1.0 10 1.0 6 7 8 9 10 11 12 1.0 13 1.0 14 1.0 12 13 14 15 16 1.0 17 1.0 16 17	C 1.402895 0.267028 -0.147381 C 0.064278 0.546738 0.144835 C -0.890531 -0.502853 0.658449 H -1.615509 -0.030984 1.336495 C -1.662202 -1.222267 -0.467990 H -2.239676 -0.512701 -1.071556 H 1.992169 1.101171 -0.531847 H -0.972773 -1.746731 -1.137996 H -0.353696 -1.249674 1.255336 H -2.362720 -1.956651 -0.053473 C -0.498684 1.920581 -0.087654 H -1.366386 1.894397 -0.764152 H -0.859936 2.368596 0.8508…	57.4549 143.0197 205.3958 221.6093 228.3761 300.1450 387.2112 461.5106 534.9285 599.3303 743.4489 764.5790 801.9215 940.5362 964.5322 1015.4708 1037.3214 1041.5253 1084.1639 1100.5105 1234.3482 1257.3851 1306.5751 1352.0607 1394.0619 1432.9145 1440.4362 1485.4189 1503.5152 1519.0833 1528.0912 1530.8445 1540.2355 1550.2548 3007.1370 3031.1201 3042.6532 3048.3447 3075.8384 3113.6054 3115.0542 3125.…	0	0	0	0	0	2	1	1	0	0	1	0	0	1	0	0	0	0	0	0	0	0	0	0	0	0	0	0	0	0	0	0	0	0	0
103	C/C=C(\C)/CC	C6H12	18	-235.856	-235.69	-235.681	-235.81	-235.648	-235.639	-14.1061	1	1 2 2.0 14 1.0 15 1.0 2 3 1.0 10 1.0 3 4 1.0 5 1.0 8 1.0 4 5 6 1.0 7 1.0 9 1.0 6 7 8 9 10 11 1.0 12 1.0 13 1.0 11 12 13 14 15 16 1.0 17 1.0 18 1.0 16 17 18	C 1.113668 -0.704809 -0.097878 C 0.051660 0.106047 -0.226656 C -1.308011 -0.469559 -0.577435 H -1.195544 -1.526929 -0.846459 C -2.352840 -0.349106 0.547013 H -2.009617 -0.860314 1.453723 H -2.554119 0.695908 0.807603 H -1.697647 0.039381 -1.472594 H -3.303818 -0.800994 0.242219 C 0.094204 1.605671 -0.049779 H -0.525536 1.927115 0.797746 H 1.103223 1.988414 0.119225 H -0.309991 2.109800 -0.938734 …	57.3558 116.6096 137.9127 191.3530 234.7562 311.6920 319.8570 401.3221 494.1938 556.3312 756.4729 796.6824 861.2857 935.3764 998.7571 1020.2192 1058.8263 1074.5344 1099.4901 1109.5674 1154.0230 1244.7790 1302.2173 1374.1242 1400.7652 1434.2929 1444.2795 1451.1023 1506.4637 1513.4282 1518.6705 1519.3839 1527.6952 1533.5904 1538.9173 1753.1235 3013.0827 3029.8696 3034.3846 3048.4710 3070.0601 3070.…	0	0	0	1	0	3	0	0	0	0	0	1	0	1	0	0	0	0	0	0	0	0	0	0	0	0	0	0	0	0	0	0	0	0	0
104	[CH3]/C=C(\[CH3])/[CH2][CH3]	C6H11	17	-235.177	-235.024	-235.015	-235.132	-234.983	-234.974	40.8348	2	1 2 2.0 14 1.0 2 3 1.0 10 1.0 3 4 1.0 5 1.0 8 1.0 4 5 6 1.0 7 1.0 9 1.0 6 7 8 9 10 11 1.0 12 1.0 13 1.0 11 12 13 14 15 1.0 16 1.0 17 1.0 15 16 17	C 1.144193 -0.606211 -0.111126 C 0.057036 0.133957 -0.223240 C -1.280387 -0.483953 -0.606945 H -1.114385 -1.517509 -0.929671 C -2.320617 -0.467353 0.526276 H -1.953213 -1.019943 1.398346 H -2.555909 0.552713 0.850294 H -1.688459 0.057514 -1.474094 H -3.257449 -0.933196 0.199115 C 0.065523 1.637520 0.016144 H -0.592799 1.913745 0.849870 H 1.067475 2.011919 0.245274 H -0.301063 2.170883 -0.871793 C…	58.3931 117.6579 156.0045 189.0007 195.1845 248.4941 302.4137 369.3725 475.9106 544.6988 726.1023 795.1615 930.0935 999.6066 1011.4830 1024.0146 1055.1588 1060.9813 1104.1765 1174.4562 1203.8498 1310.9245 1366.7826 1417.0734 1431.6373 1437.9270 1489.5043 1504.0769 1506.4243 1514.7610 1520.6325 1531.2647 1537.0275 1785.8304 2980.7692 3016.2252 3031.8501 3047.9107 3058.6331 3081.4355 3082.9367 3085…	0	0	1	0	0	3	0	0	0	0	0	1	0	1	0	0	0	0	0	0	0	0	0	0	0	0	0	0	0	0	0	0	0	0	0
105	[CH3]/[CH]=C(\[CH3])/[CH2][CH2]	C6H11	17	-235.184	-235.033	-235.024	-235.141	-234.994	-234.985	34.2004	2	1 2 2.0 13 1.0 14 1.0 2 3 1.0 9 1.0 3 4 1.0 5 1.0 7 1.0 4 5 6 1.0 8 1.0 6 7 8 9 10 1.0 11 1.0 12 1.0 10 11 12 13 14 15 1.0 16 1.0 17 1.0 15 16 17	C -1.069242 -0.698961 0.092855 C 0.003991 0.097364 0.209843 C 1.367782 -0.496307 0.533198 H 1.235153 -1.560545 0.799253 C 2.360375 -0.368199 -0.580731 H 2.054566 -0.552957 -1.606466 H 1.775639 -0.015393 1.435799 H 3.420882 -0.251448 -0.380195 C -0.005280 1.597041 0.040981 H 0.712378 1.902515 -0.731482 H -0.985476 1.995042 -0.231148 H 0.311148 2.091802 0.970343 H -0.913514 -1.768487 0.246333 C -2.…	79.7381 122.6223 136.6077 146.1075 196.1347 297.7281 315.6726 383.5259 469.2000 495.4746 569.4167 753.2459 842.3268 860.0174 959.4728 1028.9899 1035.1694 1071.2728 1074.8501 1106.3991 1129.3949 1215.3380 1242.7934 1358.7575 1397.0580 1442.4314 1448.7393 1481.9219 1490.2239 1510.6854 1515.0904 1518.1010 1528.3420 1754.6874 2957.4285 3020.5404 3030.2263 3033.1829 3071.4111 3077.1094 3123.2328 3137.…	0	0	0	1	1	2	0	0	0	0	0	1	0	1	0	0	0	0	0	0	0	0	0	0	0	0	0	0	0	0	0	0	0	0	0
106	C=C(C)C(C)C	C6H12	18	-235.852	-235.687	-235.678	-235.81	-235.648	-235.639	-13.9895	1	1 2 2.0 13 1.0 14 1.0 2 3 1.0 9 1.0 3 4 1.0 5 1.0 15 1.0 4 5 6 1.0 7 1.0 8 1.0 6 7 8 9 10 1.0 11 1.0 12 1.0 10 11 12 13 14 15 16 1.0 17 1.0 18 1.0 16 17 18	C 1.747002 -1.080643 -0.000017 C 0.815979 -0.120519 -0.000005 C -0.666992 -0.471136 -0.000007 H -0.733771 -1.567487 -0.000024 C -1.384310 0.032694 1.267661 H -0.889283 -0.332320 2.174468 H -1.406269 1.128100 1.311886 H -2.423606 -0.316417 1.283914 C 1.202131 1.340776 0.000016 H 0.806819 1.864531 -0.879902 H 0.806847 1.864498 0.879968 H 2.289693 1.461248 0.000002 H 1.482012 -2.135583 -0.000031 H 2…	44.5143 178.4944 214.2685 255.5156 260.7563 279.7490 331.2361 446.3626 523.7668 554.4515 732.5361 744.5779 903.1767 923.4092 939.8564 971.6258 972.8081 1023.5061 1079.6915 1125.8562 1131.6117 1201.2947 1316.4603 1360.8142 1362.3891 1422.6292 1438.6707 1446.3645 1478.4734 1508.2613 1519.4064 1525.2436 1528.9922 1536.6102 1541.9092 1730.0142 3033.3538 3039.2785 3042.2608 3047.9405 3086.7005 3106.44…	0	0	0	0	0	3	0	0	0	1	0	1	0	0	0	1	0	0	0	0	0	0	0	0	0	0	0	0	0	0	0	0	0	0	0
107	[CH]=C([CH3])[CH]([CH3])[CH3]	C6H11	17	-235.165	-235.013	-235.004	-235.125	-234.976	-234.967	45.1224	2	1 2 2.0 13 1.0 2 3 1.0 9 1.0 3 4 1.0 5 1.0 14 1.0 4 5 6 1.0 7 1.0 8 1.0 6 7 8 9 10 1.0 11 1.0 12 1.0 10 11 12 13 14 15 1.0 16 1.0 17 1.0 15 16 17	C 1.727320 -1.180492 -0.000025 C 0.867683 -0.181758 -0.000006 C -0.645167 -0.461481 -0.000005 H -0.768581 -1.552307 -0.000020 C -1.326142 0.080663 1.270126 H -0.849252 -0.313478 2.174203 H -1.285527 1.175260 1.314913 H -2.383551 -0.209544 1.289138 C 1.332832 1.261415 0.000018 H 0.964927 1.800245 -0.882182 H 0.964936 1.800213 0.882241 H 2.424339 1.316178 0.000013 H 1.668809 -2.263218 -0.000042 C -…	47.7779 174.8680 218.2903 254.6666 261.9494 272.5861 319.8074 417.5428 511.8376 538.6481 697.0566 724.5532 850.3104 923.1469 939.2547 970.3493 1004.3890 1058.1028 1109.9345 1128.3481 1196.2531 1228.4807 1358.1157 1364.8100 1422.2850 1431.8089 1445.4566 1510.5434 1513.1709 1518.4631 1529.8509 1533.9727 1540.4811 1698.1978 3038.3432 3042.3547 3043.2222 3049.1505 3092.7378 3107.4647 3112.5337 3119.3…	0	0	0	0	0	3	0	0	1	0	0	1	0	0	0	1	0	0	0	0	0	0	0	0	0	0	0	0	0	0	0	0	0	0	0
108	[CH2]=C([CH3])[C@@H]([CH3])[CH2]	C6H11	17	-235.18	-235.03	-235.021	-235.14	-234.993	-234.984	34.5508	2	1 2 2.0 13 1.0 14 1.0 2 3 1.0 9 1.0 3 4 1.0 5 1.0 15 1.0 4 5 6 1.0 7 1.0 8 1.0 6 7 8 9 10 1.0 11 1.0 12 1.0 10 11 12 13 14 15 16 1.0 17 1.0 16 17	C -1.728134 -1.011532 -0.315817 C -0.789148 -0.100694 -0.041114 C 0.694990 -0.469964 -0.061447 H 0.742357 -1.530381 -0.369826 C 1.488930 0.337442 -1.109089 H 1.047302 0.228130 -2.105314 H 1.513119 1.404084 -0.860307 H 2.525655 -0.015566 -1.154709 C -1.142361 1.323880 0.313771 H -0.698730 1.611252 1.275654 H -0.758813 2.032032 -0.432429 H -2.225966 1.461359 0.378576 H -1.474248 -2.038112 -0.570274…	62.6528 91.1404 176.4506 222.0160 257.4980 270.1112 334.7144 442.0526 452.5767 543.2113 574.5497 745.4769 750.6690 901.1439 924.4258 941.2903 977.3717 1012.6046 1062.1194 1082.2009 1142.3590 1164.5817 1293.2154 1313.8494 1336.2839 1428.7973 1436.9490 1473.6894 1482.2385 1507.0328 1523.6387 1529.2109 1535.6796 1730.1019 2943.6270 3038.1894 3050.5400 3086.5733 3116.3541 3124.8636 3127.3439 3152.898…	0	0	0	0	1	2	0	0	0	1	0	1	0	0	0	1	0	0	0	0	0	0	0	0	0	0	0	0	0	0	0	0	0	0	0
109	[CH2]=C([CH2])[CH]([CH3])[CH3]	C6H11	17	-235.204	-235.052	-235.043	-235.159	-235.011	-235.002	23.0358	2	1 2 1.5 12 1.0 13 1.0 2 3 1.0 9 1.5 3 4 1.0 5 1.0 14 1.0 4 5 6 1.0 7 1.0 8 1.0 6 7 8 9 10 1.0 11 1.0 10 11 12 13 14 15 1.0 16 1.0 17 1.0 15 16 17	C -1.844806 -0.000145 -0.956677 C -0.839831 0.000001 -0.000072 C 0.622532 -0.000068 -0.455182 H 0.617748 -0.000234 -1.553344 C 1.363165 1.269570 0.001455 H 0.853542 2.173362 -0.350207 H 1.423759 1.324791 1.094796 H 2.387670 1.281125 -0.389559 C -1.144558 0.000208 1.359829 H -0.375128 0.000324 2.125026 H -2.175746 0.000259 1.700636 H -1.621363 -0.000308 -2.019182 H -2.893430 -0.000102 -0.671767 C …	50.7839 223.8947 248.5965 250.8339 290.6654 327.2062 442.1422 526.2267 535.9070 559.7314 620.2113 751.4051 756.5530 801.6140 923.2598 941.3608 973.8457 994.1298 1050.5935 1110.9889 1134.9178 1201.9027 1306.2815 1364.1685 1375.1636 1424.3976 1426.4731 1448.9130 1512.1922 1517.8523 1520.8542 1535.4086 1538.0519 1556.1074 3035.2885 3042.4125 3046.8703 3106.2254 3112.6355 3117.6393 3119.5772 3162.041…	0	1	0	0	0	2	2	0	0	0	0	0	0	0	0	1	0	0	0	0	0	0	0	0	0	0	0	0	0	0	0	0	0	0	0
110	CC(=C(C)C)C	C6H12	18	-235.857	-235.692	-235.682	-235.811	-235.65	-235.641	-15.0269	1	1 2 2.0 11 1.0 15 1.0 2 3 1.0 5 1.0 3 4 1.0 9 1.0 10 1.0 4 5 6 1.0 7 1.0 8 1.0 6 7 8 9 10 11 12 1.0 13 1.0 14 1.0 12 13 14 15 16 1.0 17 1.0 18 1.0 16 17 18	C 0.674761 0.000000 0.000023 C -0.674761 0.000000 -0.000028 C -1.529604 1.249506 -0.000074 H -0.964507 2.182367 -0.000112 C -1.529604 -1.249506 -0.000038 H -2.190204 -1.262153 0.878695 H -2.190120 -1.262199 -0.878833 H -0.964508 -2.182367 0.000013 H -2.190161 1.262211 0.878690 H -2.190161 1.262141 -0.878839 C 1.529604 1.249506 0.000044 H 2.190094 1.262206 0.878859 H 2.190228 1.262146 -0.878669 H …	69.2754 95.1037 131.5886 153.8012 174.1587 342.4403 345.3003 414.7105 421.4820 491.9106 521.8617 691.5534 904.3909 957.8939 970.9599 987.6224 1035.4057 1068.6345 1109.3963 1122.7563 1167.0323 1209.1452 1285.8603 1432.6146 1438.5552 1445.0674 1462.9295 1502.0867 1507.3269 1510.0037 1522.4797 1525.8223 1528.8028 1533.0629 1535.0578 1750.1965 3021.5631 3023.8701 3027.3383 3032.5743 3060.6373 3061.66…	0	0	0	0	0	4	0	0	0	0	0	2	0	0	0	0	0	0	0	0	0	0	0	0	0	0	0	0	0	0	0	0	0	0	0
111	[CH2]=C([CH3])C([CH3])[CH3] or [CH2]C(=C([CH3])[CH3])[CH3]	C6H11	17	-235.212	-235.061	-235.052	-235.166	-235.019	-235.009	18.6426	2	1 2 1.5 10 1.0 14 1.0 2 3 1.5 5 1.0 3 4 1.0 9 1.0 4 5 6 1.0 7 1.0 8 1.0 6 7 8 9 10 11 1.0 12 1.0 13 1.0 11 12 13 14 15 1.0 16 1.0 17 1.0 15 16 17	C -0.652370 -0.054602 -0.000005 C 0.742913 0.162377 -0.000002 C 1.286680 1.433496 0.000006 H 0.674642 2.328548 0.000026 C 1.698082 -1.021393 -0.000005 H 1.560603 -1.658367 -0.882278 H 2.737166 -0.679680 0.000013 H 1.560578 -1.658387 0.882250 H 2.361798 1.582190 0.000007 C -1.618784 1.104143 -0.000006 H -1.489043 1.748219 -0.881111 H -2.655907 0.753467 -0.000030 H -1.489076 1.748192 0.881125 C -1.…	61.9684 109.9511 133.9249 188.1141 289.6326 298.4687 381.3244 450.1874 496.4562 521.3340 591.1612 713.5254 779.9140 908.9345 972.5423 999.4270 1009.2831 1023.9233 1066.6729 1079.0227 1203.9036 1252.2538 1374.7640 1419.4563 1435.7094 1446.7451 1448.3339 1505.6266 1514.5980 1520.9405 1524.8199 1526.4106 1536.0920 1561.8013 3004.6027 3021.9625 3036.2547 3044.7967 3064.1305 3096.7917 3114.7768 3127.7…	0	1	0	0	0	3	1	0	0	0	1	0	0	0	0	0	0	0	0	0	0	0	0	0	0	0	0	0	0	0	0	0	0	0	0
112	C=CC(C)(C)C	C6H12	18	-235.848	-235.683	-235.674	-235.808	-235.647	-235.638	-13.4332	1	1 2 2.0 4 1.0 5 1.0 2 3 1.0 6 1.0 3 7 1.0 11 1.0 15 1.0 4 5 6 7 8 1.0 9 1.0 10 1.0 8 9 10 11 12 1.0 13 1.0 14 1.0 12 13 14 15 16 1.0 17 1.0 18 1.0 16 17 18	C 2.208527 -0.081209 0.000000 C 1.010114 -0.666244 -0.000002 C -0.353250 0.001257 0.000000 H 2.334858 0.997896 0.000000 H 3.121682 -0.670755 0.000002 H 0.968192 -1.758109 -0.000002 C -1.120983 -0.465508 1.258637 H -2.136490 -0.050505 1.269223 H -1.205928 -1.558634 1.289572 H -0.610378 -0.142591 2.172942 C -0.257057 1.535305 -0.000007 H 0.271119 1.903509 0.886965 H 0.271101 1.903505 -0.886991 H -1…	104.1789 231.2795 267.6857 291.2455 294.0191 314.0926 349.5184 383.3381 402.0215 525.6548 696.5539 717.2684 893.0967 935.6602 937.9015 948.1517 972.6174 1025.4782 1046.2803 1058.5219 1101.2780 1239.4764 1245.8122 1306.9175 1351.8530 1422.9050 1425.1854 1448.8120 1477.0068 1510.4415 1517.0074 1520.4834 1533.6254 1533.7607 1550.6655 1726.4400 3036.4008 3039.3092 3047.5437 3101.1167 3105.2084 3111.1…	0	0	0	1	0	3	0	0	0	1	0	0	0	0	0	0	1	0	0	0	0	0	0	0	0	0	0	0	0	0	0	0	0	0	0
113	[CH]=[CH]C([CH3])([CH3])[CH3]	C6H11	17	-235.162	-235.011	-235.003	-235.125	-234.978	-234.969	44.018	2	1 2 2.0 4 1.0 2 3 1.0 5 1.0 3 6 1.0 10 1.0 14 1.0 4 5 6 7 1.0 8 1.0 9 1.0 7 8 9 10 11 1.0 12 1.0 13 1.0 11 12 13 14 15 1.0 16 1.0 17 1.0 15 16 17	C 2.231660 0.000561 -0.000005 C 1.076836 -0.623270 0.000000 C -0.312693 0.005078 0.000001 H 3.280548 -0.268350 -0.000007 H 1.074118 -1.723968 0.000003 C -1.064944 -0.477809 1.259639 H -2.088069 -0.082203 1.272621 H -1.128939 -1.572461 1.290690 H -0.558187 -0.144058 2.172014 C -0.228835 1.539976 -0.000005 H 0.303467 1.905149 0.885069 H 0.303462 1.905142 -0.885083 H -1.233618 1.979197 -0.000004 C -…	95.6676 224.4454 251.1236 275.4788 284.2768 323.9673 346.7218 398.6170 398.9678 521.8519 678.1155 698.9250 834.2605 834.2783 933.3598 939.0447 957.9451 974.1505 1056.6746 1067.8075 1219.4276 1240.6815 1283.3677 1308.6554 1422.9769 1425.7158 1454.3718 1508.5371 1516.1230 1516.6678 1530.7737 1532.7473 1546.1253 1685.0676 3013.6789 3036.7734 3040.2840 3049.3676 3100.9383 3105.8402 3112.7241 3114.354…	0	0	0	1	0	3	0	0	1	0	0	0	0	0	0	0	1	0	0	0	0	0	0	0	0	0	0	0	0	0	0	0	0	0	0
114	[CH2]=CC([CH3])([CH3])[CH3]	C6H11	17	-235.17	-235.018	-235.01	-235.13	-234.982	-234.973	41.2977	2	1 2 2.0 4 1.0 5 1.0 2 3 1.0 3 6 1.0 10 1.0 14 1.0 4 5 6 7 1.0 8 1.0 9 1.0 7 8 9 10 11 1.0 12 1.0 13 1.0 11 12 13 14 15 1.0 16 1.0 17 1.0 15 16 17	C 2.287911 -0.196253 -0.000004 C 1.030449 -0.577164 0.000000 C -0.350616 -0.024033 0.000001 H 2.582352 0.859870 -0.000008 H 3.110647 -0.911069 -0.000003 C -1.095252 -0.517119 1.262663 H -2.122257 -0.132339 1.272657 H -1.139407 -1.611202 1.289430 H -0.591534 -0.176247 2.173647 C -0.297083 1.524114 -0.000005 H 0.223009 1.899879 0.887837 H 0.223006 1.899872 -0.887851 H -1.313514 1.936548 -0.000004 C…	95.4408 198.9633 221.2690 272.2280 275.1724 304.7990 340.8074 367.0011 390.3302 490.5646 602.6938 702.7119 874.0043 879.8503 934.0288 940.4106 974.8073 1005.3175 1058.3145 1069.1925 1231.4613 1234.8645 1263.8083 1414.2549 1421.6455 1439.2418 1454.3912 1506.3336 1517.4432 1517.4623 1528.0374 1529.2446 1546.9676 1749.9932 3042.2998 3043.8851 3050.2144 3062.1030 3110.7080 3112.7718 3118.4711 3121.86…	0	0	1	0	0	3	0	0	0	1	0	0	0	0	0	0	1	0	0	0	0	0	0	0	0	0	0	0	0	0	0	0	0	0	0
115	[CH2]=[CH]C([CH3])([CH3])[CH2]	C6H11	17	-235.175	-235.025	-235.016	-235.137	-234.99	-234.981	36.3033	2	1 2 2.0 4 1.0 5 1.0 2 3 1.0 6 1.0 3 7 1.0 11 1.0 15 1.0 4 5 6 7 8 1.0 9 1.0 10 1.0 8 9 10 11 12 1.0 13 1.0 14 1.0 12 13 14 15 16 1.0 17 1.0 16 17	C -2.169838 -0.109233 -0.097803 C -0.967958 -0.684186 -0.007908 C 0.393560 0.005029 0.047319 H -2.303096 0.966702 -0.165619 H -3.077254 -0.707454 -0.110002 H -0.913361 -1.771980 0.059922 C 1.307523 -0.622030 -1.029695 H 2.315395 -0.194416 -0.975684 H 1.394196 -1.706559 -0.891241 H 0.907148 -0.441821 -2.033785 C 0.289967 1.524083 -0.178480 H -0.156620 1.748244 -1.153905 H -0.321563 2.003351 0.5941…	106.1744 175.2874 250.3578 276.1564 294.1528 296.0078 351.0935 378.0190 390.5002 522.3451 548.9573 692.5335 724.4798 896.2793 922.2283 927.1770 965.1623 985.7456 1030.5093 1041.2749 1091.8082 1208.9083 1248.2665 1275.4266 1349.5433 1421.4968 1434.6796 1464.0488 1486.0209 1518.1895 1518.6506 1530.6673 1542.3882 1705.5836 3041.5386 3049.6276 3108.9933 3115.9944 3117.9752 3122.6508 3137.1856 3154.45…	0	0	0	1	1	2	0	0	0	1	0	0	0	0	0	0	1	0	0	0	0	0	0	0	0	0	0	0	0	0	0	0	0	0	0
116	CCC(=C)CC	C6H12	18	-235.852	-235.685	-235.677	-235.808	-235.646	-235.637	-12.8233	1	1 2 2.0 4 1.0 5 1.0 2 3 1.0 12 1.0 3 6 1.0 10 1.0 11 1.0 4 5 6 7 1.0 8 1.0 9 1.0 7 8 9 10 11 12 13 1.0 14 1.0 15 1.0 13 14 15 16 1.0 17 1.0 18 1.0 16 17 18	C 0.395827 1.650750 -0.207456 C -0.008259 0.429821 0.159454 C -1.452176 0.171840 0.548204 H -0.295453 2.489985 -0.229225 H 1.419099 1.866526 -0.499001 C -2.235158 -0.674694 -0.472370 H -3.274302 -0.805325 -0.149397 H -2.243472 -0.189512 -1.454854 H -1.800852 -1.672964 -0.595320 H -1.481500 -0.336315 1.523805 H -1.965510 1.131528 0.681956 C 0.916387 -0.770841 0.222935 H 0.863272 -1.186446 1.241589…	49.9359 92.4319 219.6747 235.0231 274.0253 301.3321 408.0026 474.6179 543.8996 720.9139 759.2475 811.3091 817.7786 909.4572 923.0384 1019.7210 1034.0002 1061.5288 1089.7578 1123.1852 1136.4609 1259.1263 1308.8406 1317.6662 1371.0815 1407.0433 1435.0386 1437.0870 1477.0893 1506.8277 1516.8893 1528.7950 1529.8921 1538.3365 1541.2912 1731.7390 3009.1683 3021.4327 3035.2417 3050.4287 3051.5115 3074.7…	0	0	0	0	0	2	0	0	0	1	0	1	0	2	0	0	0	0	0	0	0	0	0	0	0	0	0	0	0	0	0	0	0	0	0
117	[CH3][CH2]C(=[CH])[CH2][CH3]	C6H11	17	-235.165	-235.013	-235.004	-235.124	-234.975	-234.966	45.5782	2	1 2 2.0 4 1.0 2 3 1.0 11 1.0 3 5 1.0 9 1.0 10 1.0 4 5 6 1.0 7 1.0 8 1.0 6 7 8 9 10 11 12 1.0 13 1.0 14 1.0 12 13 14 15 1.0 16 1.0 17 1.0 15 16 17	C 0.404085 1.657404 -0.256892 C 0.014917 0.460818 0.134986 C -1.439420 0.207560 0.538702 H -0.058362 2.628952 -0.386723 C -2.208374 -0.687552 -0.447280 H -3.245627 -0.819352 -0.118141 H -2.223837 -0.240918 -1.447637 H -1.759325 -1.683101 -0.530802 H -1.450178 -0.258093 1.535451 H -1.961077 1.166365 0.636726 C 0.959387 -0.726462 0.221017 H 0.912786 -1.126475 1.245788 H 0.575812 -1.533739 -0.419700…	45.7824 88.2032 213.1550 218.5197 250.4633 283.0142 375.9538 451.8573 536.3384 690.0359 758.5831 795.4973 808.4271 854.1452 968.3831 1018.8809 1055.9306 1065.5762 1119.8909 1133.2062 1190.1310 1297.6565 1310.2525 1359.3989 1385.3016 1435.1896 1439.5425 1505.2566 1511.5379 1524.2170 1528.0605 1532.6532 1536.7688 1695.8746 3013.2463 3023.6534 3040.2968 3051.1848 3053.8001 3080.5188 3116.1855 3120.3…	0	0	0	0	0	2	0	0	1	0	0	1	0	2	0	0	0	0	0	0	0	0	0	0	0	0	0	0	0	0	0	0	0	0	0
118	[CH2][CH2]C(=[CH2])[CH2][CH3]	C6H11	17	-235.18	-235.029	-235.02	-235.139	-234.992	-234.983	35.4288	2	1 2 2.0 4 1.0 5 1.0 2 3 1.0 11 1.0 3 6 1.0 9 1.0 10 1.0 4 5 6 7 1.0 8 1.0 7 8 9 10 11 12 1.0 13 1.0 14 1.0 12 13 14 15 1.0 16 1.0 17 1.0 15 16 17	C 0.333328 1.655257 -0.193653 C -0.065541 0.427230 0.151639 C -1.520950 0.141261 0.491221 H -0.366961 2.486214 -0.233297 H 1.363456 1.884020 -0.449038 C -2.205720 -0.745578 -0.502049 H -2.045099 -0.597126 -1.565858 H -2.990535 -1.430636 -0.197239 H -1.583709 -0.317596 1.489637 H -2.057408 1.103546 0.572144 C 0.857946 -0.771447 0.230783 H 0.801496 -1.178178 1.253045 H 0.441658 -1.564983 -0.407528 …	76.7837 94.6862 138.0134 228.4201 267.0587 292.7767 393.4421 469.3571 478.2861 556.3627 725.8164 772.8935 816.6886 826.5979 924.2372 947.4362 1031.0297 1052.0042 1081.8455 1103.9575 1131.6470 1194.2210 1276.0649 1306.7159 1358.3861 1404.3741 1436.3245 1472.4284 1482.5587 1494.2929 1508.7698 1528.7984 1539.8913 1732.9211 2961.2146 3007.9277 3027.4443 3034.7503 3050.7870 3117.2921 3118.5099 3162.83…	0	0	0	0	1	1	0	0	0	1	0	1	0	2	0	0	0	0	0	0	0	0	0	0	0	0	0	0	0	0	0	0	0	0	0
119	CCCCCC	C6H14	20	-237.085	-236.895	-236.886	-237.032	-236.846	-236.837	-40.9476	1	1 2 1.0 3 1.0 4 1.0 5 1.0 2 3 4 5 6 1.0 7 1.0 8 1.0 6 7 8 9 1.0 10 1.0 11 1.0 9 10 11 12 1.0 13 1.0 14 1.0 12 13 14 15 1.0 16 1.0 17 1.0 15 16 17 18 1.0 19 1.0 20 1.0 18 19 20	C -1.414227 2.905083 0.000000 H -0.900497 3.301499 -0.884602 H -0.900497 3.301499 0.884602 H -2.434236 3.306282 0.000000 C -1.414227 1.372954 0.000000 H -1.965398 1.006883 0.877995 H -1.965398 1.006883 -0.877995 C -0.004893 0.766918 0.000000 H 0.546827 1.134100 0.878477 H 0.546827 1.134100 -0.878477 C 0.004893 -0.766918 0.000000 H -0.546827 -1.134100 -0.878477 H -0.546827 -1.134100 0.878477 C 1.4…	74.4566 100.7910 130.4694 150.4213 243.1681 254.7897 296.2101 366.3250 465.3698 738.4438 752.9648 814.6413 896.5623 914.5816 916.6092 1020.0196 1023.5328 1060.7306 1074.4994 1086.3073 1169.2122 1222.1324 1267.9653 1287.0298 1323.7653 1344.9327 1350.9074 1358.8013 1410.1367 1425.4856 1440.5266 1442.0197 1514.9183 1514.9545 1521.5814 1529.7521 1529.9362 1530.2413 1539.0259 1544.4820 3009.8112 3012.…	0	0	0	0	0	2	0	0	0	0	0	0	0	4	0	0	0	0	0	0	0	0	0	0	0	0	0	0	0	0	0	0	0	0	0
120	[CH3][CH2][CH2][CH][CH2][CH3]	C6H13	19	-236.419	-236.244	-236.234	-236.367	-236.196	-236.186	5.23678	2	1 2 1.0 3 1.0 4 1.0 5 1.0 2 3 4 5 6 1.0 7 1.0 8 1.0 6 7 8 9 1.0 10 1.0 11 1.0 9 10 11 12 1.0 13 1.0 12 13 14 1.0 15 1.0 16 1.0 14 15 16 17 1.0 18 1.0 19 1.0 17 18 19	C 3.200510 -0.109878 -0.128263 H 3.253267 -0.768854 -1.003819 H 3.409421 -0.721808 0.758099 H 4.004586 0.629187 -0.219790 C 1.829976 0.565362 -0.024908 H 1.818560 1.243172 0.840254 H 1.658780 1.195199 -0.908055 C 0.670473 -0.435589 0.108880 H 0.871278 -1.086577 0.983845 H 0.673748 -1.119795 -0.754982 C -0.673240 0.207210 0.237373 H -0.733960 1.166321 0.752919 C -1.943332 -0.550078 0.014292 H -2.1…	44.1294 48.7442 108.4368 159.3571 241.2325 246.4436 294.9484 372.5133 424.4248 465.6268 741.3754 779.5033 867.3891 901.2360 917.6148 1026.0786 1048.3224 1060.4280 1081.3264 1112.9624 1147.4329 1180.2228 1262.1212 1278.4698 1288.6004 1334.3459 1354.4046 1406.9424 1436.6211 1439.5565 1444.6509 1496.1451 1507.1156 1521.9087 1527.8911 1529.1627 1535.2786 1538.5953 2915.7763 2927.3471 3006.3460 3016.7…	0	0	0	0	0	2	0	0	0	0	0	0	1	3	0	0	0	0	0	0	0	0	0	0	0	0	0	0	0	0	0	0	0	0	0
121	[CH3][CH][CH2][CH2][CH2][CH3]	C6H13	19	-236.419	-236.244	-236.235	-236.367	-236.196	-236.186	4.95346	2	1 2 1.0 3 1.0 4 1.0 5 1.0 2 3 4 5 6 1.0 7 1.0 6 7 8 1.0 9 1.0 10 1.0 8 9 10 11 1.0 12 1.0 13 1.0 11 12 13 14 1.0 15 1.0 16 1.0 14 15 16 17 1.0 18 1.0 19 1.0 17 18 19	C -3.277760 0.087622 -0.136458 H -3.282702 0.832073 -0.945046 H -3.667851 0.605840 0.759418 H -4.004820 -0.692518 -0.389848 C -1.912503 -0.474433 0.084117 H -1.825624 -1.486087 0.478057 C -0.699200 0.398591 0.118919 H -0.672150 0.980309 1.062591 H -0.768713 1.159445 -0.675533 C 0.625447 -0.368949 -0.017634 H 0.623023 -0.924949 -0.965804 H 0.686299 -1.125452 0.778802 C 1.864520 0.532157 0.044476 H…	47.2369 91.6485 113.2712 123.0894 148.4607 249.2845 302.2227 363.5643 415.2925 465.0797 738.0248 790.1646 900.3308 916.3461 928.5805 999.8935 1026.2982 1067.1911 1076.5811 1117.3831 1147.0025 1181.3680 1248.4650 1282.5005 1319.6946 1343.4334 1354.7120 1412.0482 1430.9455 1439.9588 1442.4633 1499.1417 1505.2632 1516.6175 1517.2093 1527.4848 1529.9404 1541.0930 2916.1602 2955.7039 3003.8680 3018.16…	0	0	0	0	0	2	0	0	0	0	0	0	1	3	0	0	0	0	0	0	0	0	0	0	0	0	0	0	0	0	0	0	0	0	0
122	[CH2][CH2][CH2][CH2][CH2][CH3]	C6H13	19	-236.413	-236.238	-236.228	-236.362	-236.191	-236.182	7.93922	2	1 2 1.0 3 1.0 4 1.0 2 3 4 5 1.0 6 1.0 7 1.0 5 6 7 8 1.0 9 1.0 10 1.0 8 9 10 11 1.0 12 1.0 13 1.0 11 12 13 14 1.0 15 1.0 16 1.0 14 15 16 17 1.0 18 1.0 19 1.0 17 18 19	C -3.266493 0.213781 -0.002809 H -3.357728 1.187643 0.470495 H -4.179280 -0.266275 -0.341658 C -1.968920 -0.521784 0.018381 H -1.895905 -1.139223 0.935374 H -1.934745 -1.244014 -0.811001 C -0.735076 0.395381 -0.043743 H -0.782968 1.116001 0.785991 H -0.776042 0.990096 -0.966864 C 0.594227 -0.366132 0.019296 H 0.639505 -1.089053 -0.809118 H 0.628724 -0.962567 0.943502 C 1.826391 0.545860 -0.039606…	75.5486 97.1069 123.5972 133.4322 153.6477 249.5554 299.8436 367.8972 443.3408 483.5342 734.0158 752.9853 829.0777 897.1848 908.6929 976.1039 1031.1574 1052.9891 1072.8063 1092.0354 1120.2676 1174.5940 1239.4881 1280.8767 1302.0650 1340.0329 1345.9762 1355.6680 1405.5323 1423.9972 1441.2659 1487.4470 1498.6410 1515.1842 1519.4606 1529.9411 1531.8339 1542.4359 2927.3003 3011.3441 3019.2862 3025.85…	0	0	0	0	1	1	0	0	0	0	0	0	0	4	0	0	0	0	0	0	0	0	0	0	0	0	0	0	0	0	0	0	0	0	0
123	CCCC(C)C	C6H14	20	-237.085	-236.895	-236.886	-237.033	-236.848	-236.839	-41.9483	1	1 2 1.0 3 1.0 4 1.0 5 1.0 2 3 4 5 6 1.0 7 1.0 17 1.0 6 7 8 1.0 9 1.0 10 1.0 8 9 10 11 1.0 12 1.0 13 1.0 11 12 13 14 1.0 15 1.0 16 1.0 14 15 16 17 18 1.0 19 1.0 20 1.0 18 19 20	C 2.158797 -1.038262 0.033294 H 1.927533 -2.029222 -0.375554 H 2.248004 -1.140761 1.122907 H 3.140068 -0.736400 -0.352089 C 1.075129 -0.013247 -0.333943 H 1.027373 0.044919 -1.432844 C -0.305208 -0.482864 0.167098 H -0.293645 -0.515801 1.267925 H -0.461374 -1.520579 -0.163436 C -1.498621 0.360991 -0.301923 H -1.481223 0.432726 -1.399129 H -1.403322 1.388403 0.072512 C -2.846192 -0.213221 0.149098…	75.0132 110.9050 180.5602 227.9770 248.2115 258.0476 320.4742 377.1947 442.5712 447.6594 751.1773 820.6646 872.4638 906.9628 939.4602 971.0622 977.5307 1035.6615 1056.5548 1089.4773 1177.7859 1204.9218 1217.4354 1286.2356 1317.0537 1344.9847 1375.6874 1389.1967 1419.2862 1429.3991 1440.8875 1449.0043 1509.5638 1520.3064 1523.2223 1526.3568 1529.7917 1535.5298 1538.8874 1542.6344 3000.5329 3008.07…	0	0	0	0	0	3	0	0	0	0	0	0	0	2	0	1	0	0	0	0	0	0	0	0	0	0	0	0	0	0	0	0	0	0	0
124	[CH3][CH2][CH][CH]([CH3])[CH3]	C6H13	19	-236.419	-236.244	-236.234	-236.368	-236.197	-236.187	4.35056	2	1 2 1.0 3 1.0 4 1.0 5 1.0 2 3 4 5 6 1.0 7 1.0 16 1.0 6 7 8 1.0 9 1.0 8 9 10 1.0 11 1.0 12 1.0 10 11 12 13 1.0 14 1.0 15 1.0 13 14 15 16 17 1.0 18 1.0 19 1.0 17 18 19	C 1.984485 -1.209496 -0.026757 H 1.581112 -2.143232 -0.433910 H 2.115342 -1.345317 1.054669 H 2.977000 -1.046681 -0.463558 C 1.047557 -0.024592 -0.317217 H 0.948389 0.073528 -1.410163 C -0.321046 -0.251683 0.255980 H -0.384653 -0.713608 1.242751 C -1.545103 0.423240 -0.276820 H -1.475885 0.500742 -1.372645 H -1.596309 1.470748 0.079389 C -2.852639 -0.283032 0.111021 H -2.957670 -0.342641 1.201088…	31.8889 59.6925 185.7540 229.1899 246.1497 262.1329 292.8831 339.3319 401.1446 456.7975 529.0570 777.3325 836.6471 898.2061 935.7783 964.2875 987.1953 1046.3812 1067.8522 1104.3028 1141.3327 1194.2891 1203.3540 1282.0066 1300.4069 1346.0469 1377.9918 1417.8578 1432.3651 1438.6762 1448.2928 1502.8725 1517.5167 1519.3602 1527.6782 1531.3195 1535.1205 1538.6100 2928.0151 2996.0598 3022.2653 3035.028…	0	0	0	0	0	3	0	0	0	0	0	0	1	1	0	1	0	0	0	0	0	0	0	0	0	0	0	0	0	0	0	0	0	0	0
125	[CH3][CH2][CH2]C([CH3])[CH3]	C6H13	19	-236.424	-236.25	-236.239	-236.371	-236.201	-236.191	2.29844	2	1 2 1.0 3 1.0 4 1.0 5 1.0 2 3 4 5 6 1.0 16 1.0 6 7 1.0 8 1.0 9 1.0 7 8 9 10 1.0 11 1.0 12 1.0 10 11 12 13 1.0 14 1.0 15 1.0 13 14 15 16 17 1.0 18 1.0 19 1.0 17 18 19	C 1.908643 -1.242186 -0.124562 H 1.288146 -2.124925 -0.322846 H 2.516071 -1.479729 0.769477 H 2.619954 -1.135867 -0.955281 C 1.080766 -0.008834 0.062972 C -0.325974 -0.108574 0.583019 H -0.504793 0.663288 1.349261 H -0.478704 -1.076785 1.081995 C -1.409541 0.048496 -0.512090 H -1.261631 -0.728106 -1.274342 H -1.265697 1.009843 -1.023482 C -2.834975 -0.033132 0.043039 H -3.017017 0.753680 0.785700…	9.6902 70.6727 92.5112 108.0850 148.5234 242.9864 292.6955 333.5887 382.6039 445.5666 749.0984 781.0591 880.1286 884.2713 958.8559 992.7464 1011.7096 1040.8159 1046.9382 1079.9731 1103.8230 1250.9774 1288.8998 1319.6803 1334.6592 1362.4913 1388.0919 1428.6642 1437.8398 1445.8438 1499.9594 1504.6625 1508.9956 1515.1292 1521.6047 1527.4388 1528.4881 1538.1626 2945.3418 2951.8113 2991.5061 3034.2399…	0	0	0	0	0	3	0	0	0	0	0	0	0	2	1	0	0	0	0	0	0	0	0	0	0	0	0	0	0	0	0	0	0	0	0
126	[CH3][CH2][CH2][C@H]([CH3])[CH2]	C6H13	19	-236.412	-236.238	-236.228	-236.364	-236.193	-236.183	6.81758	2	1 2 1.0 3 1.0 4 1.0 5 1.0 2 3 4 5 6 1.0 7 1.0 17 1.0 6 7 8 1.0 9 1.0 10 1.0 8 9 10 11 1.0 12 1.0 13 1.0 11 12 13 14 1.0 15 1.0 16 1.0 14 15 16 17 18 1.0 19 1.0 18 19	C 2.230588 -0.944180 0.053833 H 2.042267 -1.932044 -0.385737 H 2.297797 -1.063729 1.141795 H 3.203696 -0.591607 -0.305151 C 1.101013 0.049071 -0.321328 H 1.075669 0.102896 -1.421427 C -0.266225 -0.478830 0.160181 H -0.269761 -0.500843 1.261127 H -0.380253 -1.523156 -0.164821 C -1.465735 0.337356 -0.337589 H -1.459791 0.350862 -1.437038 H -1.349500 1.382697 -0.021858 C -2.809453 -0.205401 0.159063…	88.7199 116.1571 130.3410 173.2839 248.0089 250.5870 301.0672 369.1950 414.0785 441.8328 545.4978 753.2530 842.2677 870.1805 906.7169 934.7467 984.6320 1028.0040 1035.3774 1059.7417 1118.9572 1180.5414 1208.4864 1280.9381 1309.2241 1336.0337 1354.0455 1388.1594 1410.9357 1427.3387 1440.7351 1485.7705 1514.6122 1522.9875 1524.5420 1528.9213 1530.2266 1540.2559 2997.0037 3011.4764 3028.7888 3037.14…	0	0	0	0	1	2	0	0	0	0	0	0	0	2	0	1	0	0	0	0	0	0	0	0	0	0	0	0	0	0	0	0	0	0	0
127	[CH2][CH2][CH2][CH]([CH3])[CH3]	C6H13	19	-236.412	-236.238	-236.228	-236.363	-236.193	-236.183	6.92413	2	1 2 1.0 3 1.0 4 1.0 5 1.0 2 3 4 5 6 1.0 7 1.0 16 1.0 6 7 8 1.0 9 1.0 10 1.0 8 9 10 11 1.0 12 1.0 13 1.0 11 12 13 14 1.0 15 1.0 14 15 16 17 1.0 18 1.0 19 1.0 17 18 19	C 2.105388 -1.026545 0.024912 H 1.877865 -2.020937 -0.377565 H 2.210996 -1.124415 1.113400 H 3.077998 -0.716466 -0.375475 C 1.007315 -0.012878 -0.330491 H 0.943159 0.041361 -1.428841 C -0.360020 -0.494599 0.192017 H -0.337972 -0.526131 1.291182 H -0.516009 -1.531835 -0.138659 C -1.567859 0.343991 -0.265121 H -1.524257 0.439488 -1.368423 H -1.486292 1.372171 0.112815 C -2.879494 -0.235599 0.146794…	78.9184 112.5573 126.9464 184.4950 229.6162 254.5856 323.7133 376.4615 433.1162 446.0684 475.8257 748.7994 817.9908 896.0913 936.1217 939.9224 975.2305 998.9284 1058.5985 1091.9214 1129.3113 1176.5259 1205.6695 1242.8085 1310.7237 1324.9679 1370.3196 1388.6295 1414.6253 1429.8604 1448.9837 1487.6493 1498.3659 1515.6820 1520.6315 1527.2097 1535.5896 1541.0582 2922.7993 3001.2799 3018.4152 3034.529…	0	0	0	0	1	2	0	0	0	0	0	0	0	2	0	1	0	0	0	0	0	0	0	0	0	0	0	0	0	0	0	0	0	0	0
128	[CH3][CH][CH2][CH]([CH3])[CH3]	C6H13	19	-236.42	-236.245	-236.236	-236.369	-236.199	-236.189	3.13507	2	1 2 1.0 3 1.0 4 1.0 5 1.0 2 3 4 5 6 1.0 7 1.0 16 1.0 6 7 8 1.0 9 1.0 10 1.0 8 9 10 11 1.0 12 1.0 11 12 13 1.0 14 1.0 15 1.0 13 14 15 16 17 1.0 18 1.0 19 1.0 17 18 19	C 2.230935 -0.881485 0.089174 H 2.136636 -1.894770 -0.319684 H 2.282479 -0.967051 1.182674 H 3.186194 -0.467808 -0.255225 C 1.054240 0.007438 -0.335704 H 1.042664 0.048917 -1.436145 C -0.290945 -0.602163 0.115133 H -0.329844 -0.620451 1.216800 H -0.305185 -1.668508 -0.187537 C -1.500482 0.094555 -0.421176 H -1.450098 0.488722 -1.435812 C -2.844194 -0.058976 0.210780 H -2.785050 0.004842 1.306150 …	53.6989 96.9576 126.6772 193.7416 229.5883 257.2115 321.0027 370.9871 430.6935 441.5077 457.8281 814.7258 871.9733 906.4110 940.6463 972.8895 976.6754 1002.9952 1068.2660 1123.6326 1149.8291 1194.8978 1204.7078 1256.2930 1305.8444 1379.2501 1382.1403 1424.2144 1428.7999 1439.7350 1447.8587 1494.7867 1505.2607 1516.2428 1518.1414 1524.2997 1533.1226 1538.9390 2918.0483 2954.7238 2998.2662 3013.362…	0	0	0	0	0	3	0	0	0	0	0	0	1	1	0	1	0	0	0	0	0	0	0	0	0	0	0	0	0	0	0	0	0	0	0
129	CCC(C)CC	C6H14	20	-237.083	-236.893	-236.884	-237.032	-236.847	-236.838	-41.2859	1	1 2 1.0 3 1.0 4 1.0 5 1.0 2 3 4 5 6 1.0 7 1.0 8 1.0 6 7 8 9 1.0 10 1.0 17 1.0 9 10 11 1.0 12 1.0 13 1.0 11 12 13 14 1.0 15 1.0 16 1.0 14 15 16 17 18 1.0 19 1.0 20 1.0 18 19 20	C -2.585432 -0.173063 -0.291849 H -2.569458 -0.210592 -1.388477 H -2.798673 0.860561 0.001587 H -3.426358 -0.788597 0.047878 C -1.264298 -0.681121 0.297502 H -1.305088 -0.618252 1.395357 H -1.161923 -1.749281 0.059899 C 0.000001 0.051166 -0.198829 H 0.000003 0.001388 -1.300329 C 1.264300 -0.681115 0.297508 H 1.161927 -1.749278 0.059916 H 1.305092 -0.618234 1.395362 C 2.585433 -0.173062 -0.291851 …	84.8013 85.1131 202.2880 212.2652 231.5923 272.0804 320.9667 387.9398 439.5496 456.2006 772.5227 778.9747 828.9408 889.2682 970.1087 982.2679 1002.5859 1039.2421 1067.9872 1068.9573 1184.4489 1186.4639 1213.8420 1294.9646 1322.0428 1329.9253 1390.0809 1398.0482 1407.4834 1439.5304 1440.6281 1444.3112 1509.0553 1518.8004 1526.2618 1529.2994 1530.9529 1538.1815 1538.9694 1548.1288 2990.2952 3014.86…	0	0	0	0	0	3	0	0	0	0	0	0	0	2	0	1	0	0	0	0	0	0	0	0	0	0	0	0	0	0	0	0	0	0	0
130	[CH3][CH2][CH]([CH2])[CH2][CH3]	C6H13	19	-236.412	-236.237	-236.228	-236.364	-236.193	-236.184	6.64031	2	1 2 1.0 3 1.0 4 1.0 5 1.0 2 3 4 5 6 1.0 7 1.0 8 1.0 6 7 8 9 1.0 10 1.0 17 1.0 9 10 11 1.0 12 1.0 13 1.0 11 12 13 14 1.0 15 1.0 16 1.0 14 15 16 17 18 1.0 19 1.0 18 19	C 2.578532 -0.097400 0.293412 H 2.583512 -0.160918 1.388801 H 2.712332 0.956193 0.023440 H 3.447471 -0.654145 -0.075938 C 1.275303 -0.657175 -0.284741 H 1.310935 -0.614889 -1.383317 H 1.186342 -1.720481 -0.022541 C 0.005504 0.082242 0.199155 H 0.000169 0.058217 1.300321 C -1.266312 -0.675660 -0.277603 H -1.171645 -1.729682 0.019873 H -1.291523 -0.665358 -1.376418 C -2.577491 -0.107695 0.272883 H …	89.4753 95.7847 117.9063 193.2342 222.3997 246.7313 284.9869 382.1144 410.6987 436.9411 537.5899 781.9290 787.6559 824.8184 914.9719 960.8345 994.3534 1031.4119 1050.3535 1068.5335 1100.9706 1173.1958 1205.9089 1287.6782 1312.8084 1319.8102 1375.7478 1387.3052 1397.6361 1436.3723 1440.6184 1486.8053 1511.4194 1522.6146 1526.7495 1527.9654 1535.7686 1538.2919 3002.5703 3019.4954 3027.0127 3042.225…	0	0	0	0	1	2	0	0	0	0	0	0	0	2	0	1	0	0	0	0	0	0	0	0	0	0	0	0	0	0	0	0	0	0	0
131	[CH3][CH][C@@H]([CH3])[CH2][CH3]	C6H13	19	-236.418	-236.243	-236.233	-236.367	-236.197	-236.187	4.61438	2	1 2 1.0 3 1.0 4 1.0 5 1.0 2 3 4 5 6 1.0 7 1.0 6 7 8 1.0 9 1.0 16 1.0 8 9 10 1.0 11 1.0 12 1.0 10 11 12 13 1.0 14 1.0 15 1.0 13 14 15 16 17 1.0 18 1.0 19 1.0 17 18 19	C -2.620756 -0.332631 -0.300543 H -2.534297 -0.367520 -1.395175 H -3.076224 0.644963 -0.056489 H -3.345684 -1.096191 0.006364 C -1.296773 -0.530562 0.361153 H -1.284770 -0.899901 1.386580 C -0.030942 0.073886 -0.175211 H -0.058613 0.001534 -1.275661 C 1.204542 -0.710616 0.319532 H 1.036125 -1.776602 0.117203 H 1.268415 -0.615107 1.413728 C 2.536243 -0.286886 -0.309851 H 2.804174 0.744256 -0.05472…	47.7310 85.7749 110.4300 198.2377 222.0291 257.1528 295.9645 348.2823 412.1607 461.1238 508.9894 773.1218 825.3520 896.1726 958.5295 977.4723 997.7298 1030.9522 1051.6498 1110.3901 1137.0370 1190.3172 1199.5169 1291.4904 1316.3957 1357.8297 1384.2627 1421.2845 1431.2851 1438.1192 1441.4068 1504.0484 1514.2988 1517.1112 1525.5562 1527.6403 1535.6572 1541.4171 2956.7125 2981.6464 3023.0963 3040.763…	0	0	0	0	0	3	0	0	0	0	0	0	1	1	0	1	0	0	0	0	0	0	0	0	0	0	0	0	0	0	0	0	0	0	0
132	[CH3][CH2]C([CH3])[CH2][CH3]	C6H13	19	-236.423	-236.248	-236.238	-236.371	-236.199	-236.189	2.99228	2	1 2 1.0 3 1.0 4 1.0 5 1.0 2 3 4 5 6 1.0 7 1.0 8 1.0 6 7 8 9 1.0 16 1.0 9 10 1.0 11 1.0 12 1.0 10 11 12 13 1.0 14 1.0 15 1.0 13 14 15 16 17 1.0 18 1.0 19 1.0 17 18 19	C -1.953504 -0.893616 -0.517789 H -1.307340 -1.695405 -0.892564 H -2.135351 -0.197334 -1.344413 H -2.915844 -1.338805 -0.237066 C -1.308348 -0.171129 0.689474 H -2.030878 0.575130 1.056905 H -1.174347 -0.899274 1.501034 C 0.000000 0.504876 0.390959 C 1.308347 -0.171130 0.689474 H 1.174346 -0.899275 1.501035 H 2.030879 0.575128 1.056905 C 1.953502 -0.893618 -0.517789 H 2.135353 -0.197335 -1.344412…	28.3582 57.5940 91.7859 150.5935 221.5860 234.0166 282.8770 397.8171 421.8981 473.1638 712.6681 785.0064 800.4442 908.6372 963.0111 1000.8550 1005.4050 1043.5831 1054.5730 1082.9704 1090.2446 1258.7303 1259.4990 1321.0523 1360.6580 1363.7362 1373.9096 1425.6380 1430.3343 1438.2395 1499.6598 1501.5089 1516.3277 1518.1901 1526.5911 1530.1761 1532.6670 1538.1131 2963.3030 2995.3613 2998.5564 3040.95…	0	0	0	0	0	3	0	0	0	0	0	0	0	2	1	0	0	0	0	0	0	0	0	0	0	0	0	0	0	0	0	0	0	0	0
133	[CH3][CH2][C@@H]([CH3])[CH2][CH2]	C6H13	19	-236.412	-236.237	-236.228	-236.364	-236.193	-236.184	6.65579	2	1 2 1.0 3 1.0 4 1.0 5 1.0 2 3 4 5 6 1.0 7 1.0 8 1.0 6 7 8 9 1.0 10 1.0 16 1.0 9 10 11 1.0 12 1.0 13 1.0 11 12 13 14 1.0 15 1.0 14 15 16 17 1.0 18 1.0 19 1.0 17 18 19	C -2.529437 -0.148337 -0.278319 H -2.525700 -0.153449 -1.375660 H -2.724949 0.878869 0.048090 H -3.374277 -0.763255 0.052572 C -1.208405 -0.688815 0.281128 H -1.237509 -0.658873 1.380742 H -1.118001 -1.750058 0.009474 C 0.053747 0.049889 -0.205312 H 0.054862 0.018540 -1.307147 C 1.327981 -0.684965 0.275517 H 1.209900 -1.759917 0.037365 H 1.382242 -0.637766 1.373477 C 2.597666 -0.176203 -0.319881 …	88.6983 114.0845 120.8799 203.3807 218.2763 262.4086 300.7944 385.9665 431.3315 441.7866 493.1753 774.5804 820.1212 827.8495 902.1256 967.4860 999.2734 1013.5767 1048.7485 1091.7258 1131.8458 1179.0005 1201.9435 1251.7692 1300.6293 1323.6784 1379.5101 1394.3991 1405.1382 1437.3333 1441.8110 1486.3762 1495.8799 1515.1369 1526.2663 1529.3879 1535.9517 1541.1862 2931.3452 2994.2945 3017.7622 3032.64…	0	0	0	0	1	2	0	0	0	0	0	0	0	2	0	1	0	0	0	0	0	0	0	0	0	0	0	0	0	0	0	0	0	0	0
134	CC(C)C(C)C	C6H14	20	-237.083	-236.893	-236.884	-237.033	-236.848	-236.839	-42.2501	1	1 2 1.0 3 1.0 4 1.0 5 1.0 2 3 4 5 6 1.0 7 1.0 13 1.0 6 7 8 1.0 9 1.0 17 1.0 8 9 10 1.0 11 1.0 12 1.0 10 11 12 13 14 1.0 15 1.0 16 1.0 14 15 16 17 18 1.0 19 1.0 20 1.0 18 19 20	C 0.000010 1.518429 1.254759 H 0.349148 1.042070 2.175866 H -1.085003 1.664723 1.342944 H 0.462302 2.511266 1.204222 C 0.342970 0.696651 -0.000006 H 1.431409 0.522493 -0.000015 C -0.342970 -0.696651 -0.000006 H -1.431409 -0.522493 -0.000015 C 0.000010 -1.518447 -1.254754 H 1.085024 -1.664732 -1.342928 H -0.462273 -2.511288 -1.204204 H -0.349127 -1.042109 -2.175873 C -0.000010 1.518447 -1.254754 H…	60.2573 202.1521 205.4556 222.1776 241.4253 313.6892 352.3259 392.2288 412.3273 427.6870 500.2622 760.5500 879.8448 935.8113 940.8936 955.4841 969.2784 982.5897 1014.4065 1088.3460 1183.7674 1190.2958 1206.4271 1225.2598 1325.8579 1358.1884 1373.1183 1397.7265 1426.5276 1432.4954 1445.5639 1452.5362 1514.6817 1518.0321 1522.7008 1533.5190 1535.0854 1537.9081 1540.2693 1556.5854 2988.7990 3002.710…	0	0	0	0	0	4	0	0	0	0	0	0	0	0	0	2	0	0	0	0	0	0	0	0	0	0	0	0	0	0	0	0	0	0	0
135	[CH3][C@H]([CH2])[CH]([CH3])[CH3]	C6H13	19	-236.411	-236.236	-236.227	-236.364	-236.194	-236.184	6.1231	2	1 2 1.0 3 1.0 4 1.0 5 1.0 2 3 4 5 6 1.0 7 1.0 13 1.0 6 7 8 1.0 9 1.0 16 1.0 8 9 10 1.0 11 1.0 12 1.0 10 11 12 13 14 1.0 15 1.0 14 15 16 17 1.0 18 1.0 19 1.0 17 18 19	C 1.622401 1.132871 -0.027942 H 1.213063 2.059544 0.389037 H 1.716332 1.257374 -1.113784 H 2.630598 1.001417 0.379810 C 0.734287 -0.092965 0.311178 H 0.610195 -0.104793 1.406694 C -0.683081 -0.000275 -0.317443 H -0.554086 -0.048237 -1.410990 C -1.552938 -1.193369 0.109852 H -1.726792 -1.178147 1.194095 H -2.531938 -1.163144 -0.382980 H -1.077153 -2.148703 -0.135206 C 1.437674 -1.351543 -0.097302 …	84.9258 141.1739 213.6135 224.3134 235.9765 281.5640 343.7761 350.8554 383.3844 431.0787 483.5836 554.6608 756.4449 895.9716 932.0220 939.8055 971.3099 974.1030 1009.2454 1040.1634 1120.4507 1182.0138 1199.8570 1218.6255 1320.0013 1337.6108 1366.7012 1397.5649 1423.4643 1429.8959 1447.8592 1485.8850 1517.6057 1519.2953 1526.0632 1528.9526 1536.0152 1547.2728 2985.9400 3001.7596 3036.2901 3041.430…	0	0	0	0	1	3	0	0	0	0	0	0	0	0	0	2	0	0	0	0	0	0	0	0	0	0	0	0	0	0	0	0	0	0	0
136	[CH3]C([CH3])[CH]([CH3])[CH3]	C6H13	19	-236.421	-236.246	-236.236	-236.371	-236.201	-236.191	2.09916	2	1 2 1.0 3 1.0 4 1.0 5 1.0 2 3 4 5 6 1.0 12 1.0 6 7 1.0 8 1.0 16 1.0 7 8 9 1.0 10 1.0 11 1.0 9 10 11 12 13 1.0 14 1.0 15 1.0 13 14 15 16 17 1.0 18 1.0 19 1.0 17 18 19	C -1.513139 1.285417 -0.032083 H -1.036099 2.088161 -0.607571 H -1.620792 1.671390 0.999653 H -2.526735 1.152838 -0.426327 C -0.737694 -0.000003 -0.077613 C 0.718114 -0.000008 0.345830 H 0.738994 -0.000018 1.456020 C 1.482440 -1.259385 -0.106092 H 1.482864 -1.345874 -1.200007 H 2.525734 -1.211752 0.226308 H 1.048640 -2.176720 0.304112 C -1.513162 -1.285409 -0.032062 H -1.036156 -2.088163 -0.60756…	16.2734 105.0410 111.0895 217.0896 222.8927 280.8192 309.1331 386.0944 416.3417 431.7957 478.1261 707.7298 874.6390 932.0551 952.3791 974.5593 981.6825 1006.4716 1025.5838 1118.4685 1121.5470 1191.9734 1270.0564 1287.0491 1349.6063 1349.7957 1423.7684 1428.5821 1444.6401 1450.4325 1500.7059 1510.0105 1514.8874 1522.2301 1522.9010 1530.5485 1536.0695 1550.1387 2889.5937 2944.9392 2951.1234 3042.37…	0	0	0	0	0	4	0	0	0	0	0	0	0	0	1	1	0	0	0	0	0	0	0	0	0	0	0	0	0	0	0	0	0	0	0
137	CCC(C)(C)C	C6H14	20	-237.084	-236.895	-236.885	-237.036	-236.851	-236.842	-43.9283	1	1 2 1.0 3 1.0 4 1.0 5 1.0 2 3 4 5 6 1.0 13 1.0 17 1.0 6 7 1.0 8 1.0 9 1.0 7 8 9 10 1.0 11 1.0 12 1.0 10 11 12 13 14 1.0 15 1.0 16 1.0 14 15 16 17 18 1.0 19 1.0 20 1.0 18 19 20	C 1.618032 0.989661 -0.000046 H 1.593672 1.636429 0.885962 H 1.593672 1.636347 -0.886113 H 2.578316 0.459293 -0.000021 C 0.436353 -0.000500 0.000000 C -0.878586 0.823914 -0.000030 H -0.865713 1.486486 -0.877558 H -0.865712 1.486551 0.877447 C -2.193477 0.033880 -0.000001 H -2.289029 -0.605019 0.884964 H -3.048488 0.719808 -0.000012 H -2.289041 -0.605062 -0.884933 C 0.528897 -0.885012 -1.258652 H …	86.5677 209.0868 249.7811 254.7730 271.2528 285.4236 333.4689 354.4748 406.5897 418.4444 483.9194 710.1959 791.5869 877.5607 940.4818 941.7129 969.9981 1010.9178 1022.4523 1034.5648 1106.8977 1116.7146 1250.7278 1260.3118 1287.9852 1350.8597 1390.6197 1426.6923 1427.5460 1441.0925 1458.5396 1509.2340 1511.4639 1516.5045 1519.7752 1532.3178 1537.8389 1540.1985 1543.0373 1548.9767 3018.0268 3032.86…	0	0	0	0	0	4	0	0	0	0	0	0	0	1	0	0	1	0	0	0	0	0	0	0	0	0	0	0	0	0	0	0	0	0	0
138	[CH3][CH2]C([CH3])([CH3])[CH2]	C6H13	19	-236.411	-236.237	-236.228	-236.366	-236.196	-236.186	5.07611	2	1 2 1.0 3 1.0 4 1.0 5 1.0 2 3 4 5 6 1.0 13 1.0 17 1.0 6 7 1.0 8 1.0 9 1.0 7 8 9 10 1.0 11 1.0 12 1.0 10 11 12 13 14 1.0 15 1.0 16 1.0 14 15 16 17 18 1.0 19 1.0 18 19	C -1.638635 -0.784503 -0.553056 H -1.600636 -1.842944 -0.270564 H -1.628780 -0.725628 -1.649779 H -2.592070 -0.375432 -0.200147 C -0.438500 -0.001621 0.049118 C 0.869128 -0.647857 -0.488015 H 0.834018 -0.640578 -1.586689 H 0.870098 -1.706603 -0.191663 C 2.175138 0.001293 -0.016760 H 2.231778 0.030401 1.077429 H 3.040560 -0.562682 -0.383374 H 2.276167 1.029117 -0.382321 C -0.549093 1.474106 -0.387…	110.6790 130.5422 214.9236 238.4480 257.9376 282.5541 310.8996 347.2089 404.3265 409.2318 459.1567 553.7144 721.5928 795.9765 875.9075 937.1575 951.4396 982.4019 1017.1409 1026.2369 1070.9454 1103.9753 1181.4475 1261.0201 1278.5141 1348.5328 1380.4624 1418.8155 1438.0891 1439.3370 1485.2142 1508.9945 1515.5264 1522.2788 1527.6914 1530.8354 1538.4204 1545.4738 3021.5298 3032.4188 3043.1652 3049.40…	0	0	0	0	1	3	0	0	0	0	0	0	0	1	0	0	1	0	0	0	0	0	0	0	0	0	0	0	0	0	0	0	0	0	0
139	[CH3][CH]C([CH3])([CH3])[CH3]	C6H13	19	-236.417	-236.243	-236.234	-236.37	-236.2	-236.191	2.31453	2	1 2 1.0 3 1.0 4 1.0 5 1.0 2 3 4 5 6 1.0 12 1.0 16 1.0 6 7 1.0 8 1.0 7 8 9 1.0 10 1.0 11 1.0 9 10 11 12 13 1.0 14 1.0 15 1.0 13 14 15 16 17 1.0 18 1.0 19 1.0 17 18 19	C -1.538732 -0.634720 -0.874783 H -1.607439 -1.716443 -0.705482 H -1.352578 -0.474173 -1.943079 H -2.513367 -0.195137 -0.629323 C -0.417725 -0.010232 -0.017414 C 0.892837 -0.685933 -0.349308 H 0.848588 -1.754961 -0.553989 C 2.233717 -0.086683 -0.071039 H 2.405773 0.082765 1.007522 H 3.039766 -0.739053 -0.422886 H 2.363974 0.891924 -0.554102 C -0.359121 1.507867 -0.288766 H 0.391302 2.003717 0.337…	62.1163 91.0758 218.9703 252.9136 270.2758 283.0194 296.7862 343.8405 370.0875 402.0984 487.6493 514.8774 718.6330 875.1971 926.4023 941.4999 968.3655 998.1743 1028.3454 1046.9094 1090.3945 1130.4053 1215.7186 1242.4595 1295.0351 1391.5626 1417.3725 1424.1872 1440.3307 1455.1042 1503.2730 1509.8807 1514.2976 1516.7053 1520.4031 1532.9311 1535.1491 1547.8569 2963.7195 3031.8018 3036.6710 3041.8388…	0	0	0	0	0	4	0	0	0	0	0	0	1	0	0	0	1	0	0	0	0	0	0	0	0	0	0	0	0	0	0	0	0	0	0
140	[CH2][CH2]C([CH3])([CH3])[CH3]	C6H13	19	-236.413	-236.239	-236.229	-236.368	-236.198	-236.188	3.82543	2	1 2 1.0 3 1.0 4 1.0 5 1.0 2 3 4 5 6 1.0 12 1.0 16 1.0 6 7 1.0 8 1.0 9 1.0 7 8 9 10 1.0 11 1.0 10 11 12 13 1.0 14 1.0 15 1.0 13 14 15 16 17 1.0 18 1.0 19 1.0 17 18 19	C 1.597662 0.000029 -0.950896 H 1.590227 0.886394 -1.597562 H 1.590231 -0.886307 -1.597604 H 2.544012 0.000019 -0.395923 C 0.395425 0.000000 0.010344 C -0.917705 0.000023 -0.850119 H -0.876722 -0.881862 -1.506204 H -0.876723 0.881944 -1.506154 C -2.203158 -0.000003 -0.094503 H -2.667501 0.926353 0.228976 H -2.667472 -0.926387 0.228941 C 0.446359 -1.258810 0.894214 H -0.393747 -1.285797 1.597355 H…	113.7026 132.6990 230.6762 242.8076 275.1176 275.5926 323.6647 346.7740 405.0157 409.6229 438.5074 544.3163 728.7217 787.4385 885.2225 943.9581 943.9811 971.1268 1000.6001 1046.7782 1086.4969 1107.1704 1232.0355 1248.2866 1258.4484 1341.2086 1343.6061 1426.2989 1426.3743 1454.9764 1490.3550 1509.8527 1511.0996 1518.4683 1518.8349 1536.1522 1536.9837 1547.2472 3008.9264 3032.7224 3034.7131 3042.80…	0	0	0	0	1	3	0	0	0	0	0	0	0	1	0	0	1	0	0	0	0	0	0	0	0	0	0	0	0	0	0	0	0	0	0
141	C=CCCCCC	C7H14	21	-275.162	-274.968	-274.957	-275.111	-274.921	-274.91	-15.2521	1	1 2 1.0 3 1.0 4 2.0 2 3 4 5 1.0 6 1.0 5 6 7 1.0 8 1.0 9 1.0 7 8 9 10 1.0 11 1.0 12 1.0 10 11 12 13 1.0 14 1.0 15 1.0 13 14 15 16 1.0 17 1.0 18 1.0 16 17 18 19 1.0 20 1.0 21 1.0 19 20 21	C -3.725281 -0.020431 -0.502239 H -3.680187 0.719105 -1.299728 H -4.643593 -0.597031 -0.427632 C -2.707717 -0.203979 0.339909 H -2.799693 -0.959804 1.122722 C -1.400782 0.540268 0.302716 H -1.260417 1.078363 1.253352 H -1.432993 1.304018 -0.485803 C -0.187822 -0.383628 0.080924 H -0.311332 -0.912287 -0.874357 H -0.176454 -1.160091 0.859995 C 1.151405 0.363757 0.088605 H 1.267070 0.893518 1.046164…	59.7308 71.6270 113.5829 132.3566 150.6210 249.3928 275.7023 330.6784 435.2395 455.2311 655.7325 740.0233 768.3976 856.0543 898.5165 936.8707 950.0367 975.2549 1016.3479 1036.7401 1048.6982 1065.8960 1073.8265 1139.2232 1209.2171 1250.5376 1271.9588 1310.0649 1331.0662 1344.4130 1347.3363 1350.7392 1399.1582 1422.6708 1441.2005 1475.6503 1509.9364 1515.1593 1520.9395 1529.8854 1533.0954 1542.6773…	0	0	0	1	0	1	0	0	0	1	0	0	0	4	0	0	0	0	0	0	0	0	0	0	0	0	0	0	0	0	0	0	0	0	0
142	[CH2]=[CH][CH2][CH2][CH2][CH][CH3]	C7H13	20	-274.496	-274.317	-274.306	-274.446	-274.27	-274.26	30.6435	2	1 2 1.0 3 1.0 4 2.0 2 3 4 5 1.0 6 1.0 5 6 7 1.0 8 1.0 9 1.0 7 8 9 10 1.0 11 1.0 12 1.0 10 11 12 13 1.0 14 1.0 15 1.0 13 14 15 16 1.0 17 1.0 16 17 18 1.0 19 1.0 20 1.0 18 19 20	C 3.696045 -0.179374 0.415201 H 3.685199 0.329267 1.377537 H 4.601155 -0.727605 0.167168 C 2.654146 -0.127228 -0.415470 H 2.711686 -0.655744 -1.369264 C 1.363017 0.597385 -0.148518 H 1.208045 1.363589 -0.924390 H 1.430127 1.132010 0.808549 C 0.140679 -0.339198 -0.135252 H 0.276669 -1.095081 0.650162 H 0.088390 -0.889231 -1.084966 C -1.186244 0.402421 0.091867 H -1.324268 1.162049 -0.694621 H -1.1…	42.0042 66.0517 100.5309 104.7776 135.2460 146.6772 283.2592 329.7714 415.4037 437.0442 455.2811 655.3683 744.1087 842.7659 904.0260 937.2798 953.0695 984.4265 1022.7434 1025.8765 1041.1952 1053.3098 1112.6596 1139.3447 1163.5764 1225.0289 1267.9142 1303.4024 1327.6863 1340.1994 1347.3510 1398.2668 1430.0812 1440.6662 1475.6867 1499.2784 1505.3495 1510.3647 1517.1002 1531.5595 1733.2134 2917.6923…	0	0	0	1	0	1	0	0	0	1	0	0	1	3	0	0	0	0	0	0	0	0	0	0	0	0	0	0	0	0	0	0	0	0	0
143	[CH]=[CH][CH2][CH2][CH2][CH2][CH3]	C7H13	20	-274.475	-274.295	-274.284	-274.427	-274.25	-274.24	43.082	2	1 2 1.0 3 2.0 2 3 4 1.0 5 1.0 4 5 6 1.0 7 1.0 8 1.0 6 7 8 9 1.0 10 1.0 11 1.0 9 10 11 12 1.0 13 1.0 14 1.0 12 13 14 15 1.0 16 1.0 17 1.0 15 16 17 18 1.0 19 1.0 20 1.0 18 19 20	C -3.775277 -0.102306 -0.546633 H -4.763429 -0.538324 -0.626975 C -2.781314 -0.118870 0.311495 H -2.882166 -0.719905 1.227269 C -1.463300 0.607137 0.157737 H -1.338093 1.302547 1.001561 H -1.487548 1.215919 -0.753560 C -0.258729 -0.350659 0.118453 H -0.375633 -1.036387 -0.731845 H -0.264568 -0.979190 1.021268 C 1.086767 0.378163 0.014216 H 1.195350 1.066235 0.866075 H 1.089929 1.008992 -0.887153 …	60.6733 73.7839 114.0118 133.9858 152.8918 249.5808 283.8136 330.7560 428.2492 453.1832 656.1390 740.0945 765.2831 810.0159 818.0640 863.7182 906.6554 974.2674 1015.7610 1033.1483 1052.3060 1072.1023 1138.2415 1157.7402 1238.8979 1263.0016 1289.8317 1312.9274 1343.0243 1346.4459 1349.8466 1399.5019 1422.7907 1441.3433 1508.5563 1515.2613 1520.6772 1529.9134 1532.8562 1542.6465 1695.5899 3012.5535…	0	0	0	1	0	1	0	0	1	0	0	0	0	4	0	0	0	0	0	0	0	0	0	0	0	0	0	0	0	0	0	0	0	0	0
144	[CH2]=[CH][CH2][CH2][CH2][CH2][CH2]	C7H13	20	-274.49	-274.31	-274.3	-274.441	-274.266	-274.255	33.6312	2	1 2 1.0 3 1.0 4 2.0 2 3 4 5 1.0 6 1.0 5 6 7 1.0 8 1.0 9 1.0 7 8 9 10 1.0 11 1.0 12 1.0 10 11 12 13 1.0 14 1.0 15 1.0 13 14 15 16 1.0 17 1.0 18 1.0 16 17 18 19 1.0 20 1.0 19 20	C -3.649633 0.011624 -0.509820 H -3.606216 0.819478 -1.238103 H -4.564398 -0.575016 -0.491010 C -2.634421 -0.239772 0.317467 H -2.724414 -1.062695 1.029623 C -1.332518 0.513463 0.352727 H -1.199225 0.965161 1.348199 H -1.366860 1.344308 -0.364609 C -0.112931 -0.379437 0.054262 H -0.228719 -0.820805 -0.945363 H -0.099790 -1.222592 0.760599 C 1.219974 0.373623 0.135993 H 1.334299 0.814221 1.136164 …	61.0244 73.0911 106.9990 126.5272 134.8636 155.4003 278.7475 332.0397 425.4436 453.5498 474.5909 656.3217 735.0585 772.7305 870.9653 919.2935 937.7865 947.0976 1015.0958 1036.2511 1052.8189 1064.9504 1073.7785 1092.6056 1165.2301 1214.1322 1267.5922 1286.1991 1329.3242 1332.6088 1343.0371 1349.8746 1395.8144 1418.8675 1475.7859 1487.5022 1498.7228 1510.7782 1518.7940 1536.5281 1733.2409 2929.3042…	0	0	0	1	1	0	0	0	0	1	0	0	0	4	0	0	0	0	0	0	0	0	0	0	0	0	0	0	0	0	0	0	0	0	0
145	[CH2]=[CH][CH2][CH][CH2][CH2][CH3]	C7H13	20	-274.496	-274.316	-274.305	-274.445	-274.269	-274.259	31.1431	2	1 2 1.0 3 1.0 4 2.0 2 3 4 5 1.0 6 1.0 5 6 7 1.0 8 1.0 9 1.0 7 8 9 10 1.0 11 1.0 10 11 12 1.0 13 1.0 14 1.0 12 13 14 15 1.0 16 1.0 17 1.0 15 16 17 18 1.0 19 1.0 20 1.0 18 19 20	C 3.766538 0.248365 -0.237711 H 3.941482 -0.414393 -1.083325 H 4.581818 0.913984 0.033403 C 2.613295 0.239837 0.431140 H 2.475815 0.925320 1.268436 C 1.432482 -0.645038 0.115183 H 1.224591 -1.301320 0.976125 H 1.709909 -1.325896 -0.711668 C 0.189644 0.125198 -0.221760 H 0.301741 1.024123 -0.826836 C -1.178092 -0.456108 -0.059915 H -1.224149 -1.044606 0.870550 H -1.382519 -1.188547 -0.866824 C -2.…	34.5005 43.4416 73.3826 118.0043 176.7832 243.9555 281.7638 330.8875 429.9331 448.3476 451.8960 654.4304 743.3550 859.3937 886.6199 903.0307 938.6103 953.3857 1022.8762 1036.4409 1062.8877 1078.5046 1121.2010 1142.3429 1148.1148 1242.3358 1266.5778 1268.1520 1329.9160 1334.7710 1344.7478 1399.5712 1433.6324 1441.2086 1470.0093 1490.3303 1501.9978 1521.8575 1529.1833 1538.4342 1730.1065 2918.1079 …	0	0	0	1	0	1	0	0	0	1	0	0	1	3	0	0	0	0	0	0	0	0	0	0	0	0	0	0	0	0	0	0	0	0	0
146	[CH2]=C[CH2][CH2][CH2][CH2][CH3]	C7H13	20	-274.483	-274.302	-274.292	-274.433	-274.256	-274.246	39.4031	2	1 2 1.0 3 1.0 4 2.0 2 3 4 5 1.0 5 6 1.0 7 1.0 8 1.0 6 7 8 9 1.0 10 1.0 11 1.0 9 10 11 12 1.0 13 1.0 14 1.0 12 13 14 15 1.0 16 1.0 17 1.0 15 16 17 18 1.0 19 1.0 20 1.0 18 19 20	C 3.861905 -0.244567 0.314955 H 4.049630 0.196585 1.301835 H 4.675621 -0.840595 -0.096980 C 2.728993 -0.058669 -0.323212 C 1.428865 0.619466 -0.159201 H 1.297063 1.362916 -0.959499 H 1.435679 1.190228 0.788333 C 0.225884 -0.346576 -0.165991 H 0.355273 -1.081593 0.639516 H 0.230703 -0.915083 -1.105473 C -1.117611 0.373596 -0.002589 H -1.235406 1.113131 -0.808887 H -1.113169 0.946986 0.936564 C -2.…	58.1307 72.7750 111.1974 131.4831 153.0953 249.4237 263.5661 310.8365 374.7780 427.6903 562.9778 739.2242 763.2295 847.2218 880.2857 890.9076 929.3443 973.4949 1012.2671 1028.5064 1048.7363 1072.4030 1138.4739 1155.8899 1241.0785 1268.0775 1302.2038 1337.5850 1342.0356 1347.4990 1394.9162 1422.9468 1441.5183 1444.9052 1486.8493 1515.5528 1519.7072 1529.9724 1532.0138 1542.4260 1759.6403 2951.6276…	0	0	1	0	0	1	0	0	0	1	0	0	0	4	0	0	0	0	0	0	0	0	0	0	0	0	0	0	0	0	0	0	0	0	0
147	[CH2]=[CH][CH2][CH2][CH][CH2][CH3]	C7H13	20	-274.496	-274.316	-274.306	-274.446	-274.27	-274.259	30.9167	2	1 2 1.0 3 1.0 4 2.0 2 3 4 5 1.0 6 1.0 5 6 7 1.0 8 1.0 9 1.0 7 8 9 10 1.0 11 1.0 12 1.0 10 11 12 13 1.0 14 1.0 13 14 15 1.0 16 1.0 17 1.0 15 16 17 18 1.0 19 1.0 20 1.0 18 19 20	C 3.638502 0.267126 0.575411 H 3.490604 1.184024 1.143070 H 4.596469 -0.230924 0.700104 C 2.694120 -0.214795 -0.233435 H 2.888168 -1.140141 -0.780022 C 1.342610 0.404917 -0.458513 H 1.232865 0.667796 -1.522148 H 1.261937 1.342312 0.105694 C 0.177898 -0.532419 -0.070422 H 0.261372 -0.793631 0.995107 H 0.308592 -1.491690 -0.610040 C -1.170997 0.046259 -0.352606 H -1.280704 0.681786 -1.232047 C -2.4…	37.7460 45.2957 85.2811 113.8259 151.5180 243.3210 274.2176 341.1983 420.7055 436.9047 458.1569 654.3521 759.2783 789.9035 901.6082 938.1904 944.7635 981.9788 1019.0106 1037.7951 1045.5763 1064.8200 1115.9400 1145.0902 1155.7608 1233.3671 1264.9553 1286.7443 1317.3954 1332.5898 1345.0369 1393.1423 1436.5750 1441.4269 1475.2179 1496.3309 1506.6548 1518.2199 1527.8681 1535.1445 1733.2609 2920.9901 …	0	0	0	1	0	1	0	0	0	1	0	0	1	3	0	0	0	0	0	0	0	0	0	0	0	0	0	0	0	0	0	0	0	0	0
148	C/C=C/CCCC	C7H14	21	-275.168	-274.973	-274.963	-275.115	-274.925	-274.915	-17.9439	1	1 2 2.0 17 1.0 18 1.0 2 3 1.0 4 1.0 3 4 5 1.0 6 1.0 7 1.0 5 6 7 8 1.0 9 1.0 10 1.0 8 9 10 11 1.0 12 1.0 13 1.0 11 12 13 14 1.0 15 1.0 16 1.0 14 15 16 17 18 19 1.0 20 1.0 21 1.0 19 20 21	C -2.442870 0.148574 -0.374969 C -1.389565 0.151740 0.446427 H -1.476393 -0.350452 1.413279 C -0.055522 0.782180 0.151627 H 0.163886 1.550392 0.910012 H -0.098281 1.304179 -0.813995 C 1.103958 -0.232312 0.137866 H 0.906116 -0.991708 -0.631505 H 1.127115 -0.770008 1.097363 C 2.472256 0.413164 -0.114461 H 2.661464 1.173510 0.656843 H 2.447124 0.952401 -1.072198 C 3.623094 -0.598094 -0.128298 H 3.47…	60.2407 80.9544 109.0413 140.7142 213.8104 238.4158 247.1740 289.6959 333.8427 433.4199 534.8943 742.7718 774.8916 811.7826 897.7083 928.5983 956.9975 1012.1854 1014.4078 1064.1279 1066.0443 1078.9979 1098.4869 1133.6287 1191.4706 1252.8394 1284.0608 1320.9699 1339.8112 1348.1835 1353.8767 1386.9431 1417.3471 1441.0326 1442.6279 1508.5175 1510.1741 1516.8018 1523.5677 1528.6964 1529.8084 1541.388…	0	0	0	2	0	2	0	0	0	0	0	0	0	3	0	0	0	0	0	0	0	0	0	0	0	0	0	0	0	0	0	0	0	0	0
149	[CH3]/[CH]=C/[CH2][CH2][CH2][CH3]	C7H13	20	-274.488	-274.307	-274.297	-274.436	-274.259	-274.249	37.5382	2	1 2 2.0 16 1.0 17 1.0 2 3 1.0 3 4 1.0 5 1.0 6 1.0 4 5 6 7 1.0 8 1.0 9 1.0 7 8 9 10 1.0 11 1.0 12 1.0 10 11 12 13 1.0 14 1.0 15 1.0 13 14 15 16 17 18 1.0 19 1.0 20 1.0 18 19 20	C 2.542138 0.165779 0.366124 C 1.402525 0.229004 -0.289164 C 0.055267 0.817807 -0.158599 H -0.136890 1.499985 -1.000588 H 0.023800 1.445692 0.751990 C -1.075305 -0.229631 -0.093593 H -0.891544 -0.900156 0.756644 H -1.033392 -0.856739 -0.994340 C -2.467509 0.400085 0.033015 H -2.639251 1.074436 -0.818195 H -2.500356 1.031582 0.932410 C -3.591948 -0.638477 0.096955 H -3.466327 -1.306057 0.958199 H …	65.1040 76.1667 92.7285 127.4044 194.0089 223.2185 238.4202 255.7736 338.3619 449.6030 495.9172 737.9453 747.3019 798.6393 873.4596 916.7886 940.4696 1006.5043 1060.8048 1065.3446 1070.0499 1085.6588 1132.5542 1148.6853 1243.6773 1278.4808 1307.9184 1330.2671 1342.7704 1372.5302 1415.5440 1432.6099 1441.5019 1486.2560 1514.2120 1516.8624 1519.2846 1527.2099 1529.8836 1540.9252 1783.1683 2947.6346…	0	0	1	1	0	2	0	0	0	0	0	0	0	3	0	0	0	0	0	0	0	0	0	0	0	0	0	0	0	0	0	0	0	0	0
150	[CH3]/[CH]=[CH]/[CH2][CH][CH2][CH3]	C7H13	20	-274.501	-274.322	-274.311	-274.449	-274.274	-274.263	28.484	2	1 2 2.0 16 1.0 17 1.0 2 3 1.0 4 1.0 3 4 5 1.0 6 1.0 7 1.0 5 6 7 8 1.0 9 1.0 8 9 10 1.0 11 1.0 12 1.0 10 11 12 13 1.0 14 1.0 15 1.0 13 14 15 16 17 18 1.0 19 1.0 20 1.0 18 19 20	C -2.450179 0.188694 -0.290140 C -1.316851 0.085097 0.408558 H -1.274166 -0.606888 1.251880 C -0.045100 0.844290 0.119925 H 0.210005 1.482135 0.982483 H -0.231170 1.546622 -0.714981 C 1.123060 -0.046212 -0.186510 H 0.936170 -0.936780 -0.785568 C 2.537248 0.404753 -0.005095 H 2.625496 0.973917 0.933461 H 2.813110 1.126698 -0.798834 C 3.555083 -0.744114 -0.013400 H 3.508204 -1.302895 -0.955847 H 3.…	40.9799 48.5308 66.6961 156.6020 213.0568 232.4261 253.4929 277.5803 338.5889 428.5181 446.0031 530.3588 766.1896 789.0381 862.8774 934.0956 950.6163 1012.9718 1023.8414 1062.0832 1079.0352 1083.1089 1119.1932 1137.4135 1151.6050 1222.8380 1274.4783 1287.9874 1340.0983 1348.8478 1378.7518 1431.6310 1439.1838 1442.4824 1488.2132 1503.8012 1510.2341 1522.8745 1527.8805 1535.1618 1756.3072 2927.0480…	0	0	0	2	0	2	0	0	0	0	0	0	1	2	0	0	0	0	0	0	0	0	0	0	0	0	0	0	0	0	0	0	0	0	0
151	[CH3]/[CH]=[CH]/[CH2][CH2][CH2][CH2]	C7H13	20	-274.495	-274.316	-274.305	-274.445	-274.27	-274.259	30.9806	2	1 2 2.0 16 1.0 17 1.0 2 3 1.0 4 1.0 3 4 5 1.0 6 1.0 7 1.0 5 6 7 8 1.0 9 1.0 10 1.0 8 9 10 11 1.0 12 1.0 13 1.0 11 12 13 14 1.0 15 1.0 14 15 16 17 18 1.0 19 1.0 20 1.0 18 19 20	C -2.375023 0.202681 -0.350652 C -1.317603 0.086616 0.457205 H -1.405298 -0.536304 1.350896 C 0.022041 0.735291 0.237986 H 0.256112 1.394470 1.089106 H -0.019997 1.379979 -0.650471 C 1.167055 -0.282980 0.082558 H 0.963266 -0.930554 -0.779691 H 1.191132 -0.941656 0.962877 C 2.545272 0.380593 -0.086786 H 2.708954 1.059508 0.773380 H 2.533295 1.037790 -0.968700 C 3.669614 -0.593433 -0.194527 H 3.661…	62.1188 80.0581 105.7124 121.7542 144.0808 213.9547 242.2809 287.3292 336.7106 421.6579 471.6098 536.5606 735.9593 773.8454 833.3214 892.1160 942.2499 1012.4897 1022.0871 1042.9721 1062.8645 1079.1049 1089.8736 1100.6056 1168.5580 1198.1347 1270.5751 1303.5927 1330.8010 1341.8614 1352.8818 1383.8830 1411.1594 1442.7097 1487.5311 1499.1299 1508.6529 1510.1461 1523.4469 1530.7059 1758.8353 2926.461…	0	0	0	2	1	1	0	0	0	0	0	0	0	3	0	0	0	0	0	0	0	0	0	0	0	0	0	0	0	0	0	0	0	0	0
152	[CH2]=[CH][CH][CH2][CH2][CH2][CH3] or [CH2]/[CH]=[CH]/[CH2][CH2][CH2][CH3]	C7H13	20	-274.522	-274.341	-274.331	-274.467	-274.29	-274.28	17.7122	2	1 2 1.5 17 1.0 18 1.5 2 3 1.0 4 1.0 3 4 5 1.0 6 1.0 7 1.0 5 6 7 8 1.0 9 1.0 10 1.0 8 9 10 11 1.0 12 1.0 13 1.0 11 12 13 14 1.0 15 1.0 16 1.0 14 15 16 17 18 19 1.0 20 1.0 19 20	C -2.557040 0.133730 -0.370361 C -1.460473 0.081507 0.480483 H -1.550986 -0.491692 1.404543 C -0.141568 0.741598 0.218916 H 0.081837 1.458892 1.026217 H -0.196089 1.328907 -0.707894 C 1.034558 -0.254552 0.126593 H 0.841441 -0.962753 -0.690921 H 1.072906 -0.854252 1.047643 C 2.389694 0.429918 -0.092044 H 2.573170 1.139367 0.727553 H 2.347410 1.031850 -1.010982 C 3.555939 -0.559435 -0.182962 H 3.41…	50.0737 81.6295 110.4544 138.2531 225.4031 246.7630 290.1493 331.4157 422.4137 534.6129 548.6207 741.9509 749.4840 782.0119 802.5250 900.5593 925.5960 961.7339 1001.2009 1011.4636 1062.2734 1064.2388 1124.2676 1171.1816 1223.0320 1248.2093 1279.9911 1294.2706 1322.5758 1344.6009 1352.9452 1392.6990 1413.8576 1441.2399 1505.4225 1516.5028 1521.9629 1528.2822 1529.7683 1540.9451 1542.9849 2989.6931…	1	0	0	0	0	1	1	1	0	0	0	0	0	3	0	0	0	0	0	0	0	0	6.14421e-06	0.00247875	0.0497871	0	0	0	0	0	0.0523892	0	0	0	0
153	[CH3]/C=[CH]/[CH2][CH2][CH2][CH3]	C7H13	20	-274.488	-274.307	-274.297	-274.436	-274.26	-274.249	37.3273	2	1 2 2.0 17 1.0 2 3 1.0 4 1.0 3 4 5 1.0 6 1.0 7 1.0 5 6 7 8 1.0 9 1.0 10 1.0 8 9 10 11 1.0 12 1.0 13 1.0 11 12 13 14 1.0 15 1.0 16 1.0 14 15 16 17 18 1.0 19 1.0 20 1.0 18 19 20	C -2.474867 0.036782 -0.285381 C -1.416052 0.256024 0.463778 H -1.469939 0.012737 1.536545 C -0.088090 0.801327 -0.011375 H 0.138810 1.729213 0.536095 H -0.164734 1.071960 -1.071319 C 1.072705 -0.189171 0.191751 H 0.859928 -1.109214 -0.370170 H 1.119162 -0.482766 1.251082 C 2.432444 0.375482 -0.238367 H 2.636591 1.297139 0.325291 H 2.383309 0.671215 -1.296016 C 3.586265 -0.612358 -0.037613 H 3.42…	54.4938 79.4271 112.7891 132.0738 200.0370 219.5062 239.1081 252.6956 328.6203 408.7426 494.5425 742.7447 761.0555 805.5874 884.3966 923.4306 956.3780 1011.6002 1040.6497 1062.0845 1066.7565 1078.6549 1132.6541 1155.9844 1247.8775 1278.2703 1313.6645 1334.8411 1344.5443 1377.3741 1416.3108 1426.7633 1440.9189 1487.9612 1506.4088 1508.7009 1516.7938 1528.5376 1529.8506 1541.3024 1784.4736 2981.441…	0	0	1	1	0	2	0	0	0	0	0	0	0	3	0	0	0	0	0	0	0	0	0	0	0	0	0	0	0	0	0	0	0	0	0
154	[CH3]/[CH]=[CH]/[CH2][CH2][CH][CH3]	C7H13	20	-274.502	-274.323	-274.312	-274.45	-274.275	-274.264	27.9666	2	1 2 2.0 16 1.0 17 1.0 2 3 1.0 4 1.0 3 4 5 1.0 6 1.0 7 1.0 5 6 7 8 1.0 9 1.0 10 1.0 8 9 10 11 1.0 12 1.0 11 12 13 1.0 14 1.0 15 1.0 13 14 15 16 17 18 1.0 19 1.0 20 1.0 18 19 20	C -2.384620 0.032747 -0.431640 C -1.356230 0.278038 0.384738 H -1.477804 0.088075 1.454240 C -0.007986 0.788945 -0.043050 H 0.196574 1.751271 0.451953 H -0.007710 0.988140 -1.122142 C 1.143723 -0.181408 0.298653 H 0.968638 -1.145053 -0.203492 H 1.095065 -0.413197 1.381562 C 2.495355 0.345092 -0.061424 H 2.660491 1.419346 0.010106 C 3.683488 -0.551498 -0.173660 H 3.441608 -1.476973 -0.714683 H 4.0…	48.0208 70.8743 82.9182 122.2193 134.7001 213.5180 241.9359 287.9319 339.5146 414.3497 436.3426 534.1401 756.0687 795.6175 898.1626 935.9907 974.3377 1008.8632 1014.8513 1026.7264 1078.9492 1091.4037 1116.4370 1135.1603 1159.9752 1211.4925 1279.2671 1309.0843 1342.7490 1351.5668 1382.8902 1425.0925 1440.0137 1442.5792 1498.7083 1505.1461 1510.0535 1515.3226 1518.4775 1523.6031 1759.0799 2920.3865…	0	0	0	2	0	2	0	0	0	0	0	0	1	2	0	0	0	0	0	0	0	0	0	0	0	0	0	0	0	0	0	0	0	0	0
155	CC/C=C/CCC	C7H14	21	-275.168	-274.973	-274.963	-275.115	-274.924	-274.914	-17.5609	1	1 2 2.0 13 1.0 14 1.0 2 3 1.0 4 1.0 3 4 5 1.0 6 1.0 7 1.0 5 6 7 8 1.0 9 1.0 10 1.0 8 9 10 11 1.0 12 1.0 17 1.0 11 12 13 14 15 1.0 16 1.0 18 1.0 15 16 17 18 19 1.0 20 1.0 21 1.0 19 20 21	C 1.186227 -0.057906 -0.352842 C 0.116491 0.142359 0.421912 H 0.195680 0.847407 1.253393 C -1.227187 -0.510395 0.241941 H -1.483803 -1.080751 1.148832 H -1.178812 -1.239160 -0.578669 C -2.359101 0.498428 -0.032860 H -2.123284 1.057353 -0.948066 H -2.387050 1.239310 0.778540 C -3.732439 -0.166375 -0.167517 H -4.003653 -0.705856 0.748505 H -3.743870 -0.889814 -0.992147 H 1.108223 -0.763596 -1.18400…	50.3393 88.9716 93.7876 123.9479 215.5776 245.9301 283.9236 313.3686 325.0043 468.3770 524.7324 750.3146 774.4356 825.7493 880.6554 905.5067 926.0868 1004.6531 1015.5543 1045.4908 1067.8155 1098.2416 1116.9744 1124.9513 1197.3612 1264.8859 1292.9434 1313.4094 1330.7374 1347.1525 1352.5588 1387.2846 1410.2954 1435.8378 1440.0147 1508.8672 1511.0848 1522.9115 1527.7210 1529.3118 1536.8490 1539.2423…	0	0	0	2	0	2	0	0	0	0	0	0	0	3	0	0	0	0	0	0	0	0	0	0	0	0	0	0	0	0	0	0	0	0	0
156	[CH3]/[CH]=[CH]/[CH][CH2][CH2][CH3] or [CH3][CH]/[CH]=[CH]/[CH2][CH2][CH3]	C7H13	20	-274.528	-274.347	-274.337	-274.472	-274.295	-274.285	14.9081	2	1 2 1.5 13 1.0 14 1.5 2 3 1.0 4 1.0 3 4 5 1.0 6 1.0 7 1.0 5 6 7 8 1.0 9 1.0 10 1.0 8 9 10 11 1.0 12 1.0 16 1.0 11 12 13 14 15 1.0 17 1.0 15 16 17 18 1.0 19 1.0 20 1.0 18 19 20	C 1.273530 -0.140201 0.192697 C 0.094350 0.587211 0.278833 H 0.131358 1.659706 0.081331 C -1.246732 0.005688 0.607920 H -1.648611 0.482469 1.517818 H -1.142603 -1.062742 0.842464 C -2.287173 0.181212 -0.519444 H -1.916061 -0.312495 -1.427029 H -2.373296 1.248730 -0.765243 C -3.665780 -0.374370 -0.149357 H -4.069980 0.126455 0.739149 H -3.614975 -1.447814 0.071200 H 1.213521 -1.213448 0.390429 C 2…	46.9066 83.7197 113.6171 160.0364 210.8307 214.5464 247.1013 295.3475 350.7327 450.9493 531.8840 730.0099 750.6218 769.8673 873.6874 894.8565 942.7144 988.4644 1016.9834 1038.2207 1052.6289 1099.4358 1108.6559 1176.5919 1222.0565 1259.9103 1299.4222 1306.7598 1329.1131 1343.5770 1395.3998 1438.0193 1439.6872 1470.5816 1503.9348 1507.0880 1522.0167 1525.9947 1529.5105 1538.4398 1553.8693 2986.4095…	2	0	0	0	0	2	0	1	0	0	0	0	0	2	0	0	0	0.00247875	0	0	0	0	0.0500342	0	0.0995741	0	0	0	0	0	0.0523954	0	0	0	0
157	[CH3][CH2]/[CH]=[CH]/[CH2][CH][CH3]	C7H13	20	-274.501	-274.322	-274.311	-274.449	-274.274	-274.263	28.6345	2	1 2 2.0 12 1.0 13 1.0 2 3 1.0 4 1.0 3 4 5 1.0 6 1.0 7 1.0 5 6 7 8 1.0 9 1.0 8 9 10 1.0 11 1.0 16 1.0 10 11 12 13 14 1.0 15 1.0 17 1.0 14 15 16 17 18 1.0 19 1.0 20 1.0 18 19 20	C 1.166458 0.000981 -0.379405 C 0.061955 0.062669 0.368983 H 0.084446 0.627955 1.302786 C -1.260597 -0.576202 0.023878 H -1.527562 -1.316743 0.796411 H -1.142931 -1.160729 -0.908684 C -2.383448 0.410394 -0.107669 H -2.157920 1.374293 -0.559460 C -3.811244 -0.001407 0.033275 H -3.952543 -0.688059 0.879586 H -4.184183 -0.534743 -0.860960 H 1.136513 -0.563334 -1.315127 C 2.488751 0.633760 -0.038480 …	46.6529 53.3496 91.9892 116.1844 130.8547 211.3423 295.3518 304.7864 327.1360 435.8105 469.2358 519.0453 767.9112 823.1398 874.9425 916.4488 931.2820 996.1797 1014.5051 1026.7409 1080.5994 1107.0624 1118.1834 1144.7371 1154.2678 1224.8599 1288.6358 1307.4734 1338.8614 1348.0115 1388.0418 1416.1477 1436.1391 1438.0810 1489.0135 1504.1512 1511.0430 1516.3208 1527.9146 1536.8866 1751.9856 2938.6141 …	0	0	0	2	0	2	0	0	0	0	0	0	1	2	0	0	0	0	0	0	0	0	0	0	0	0	0	0	0	0	0	0	0	0	0
158	[CH3][CH2]/[CH]=[CH]/[CH][CH2][CH3]	C7H13	20	-274.527	-274.346	-274.336	-274.471	-274.294	-274.284	15.4452	2	1 2 1.5 12 1.0 13 1.0 2 3 1.0 4 1.5 3 4 5 1.0 6 1.0 5 6 7 1.0 8 1.0 9 1.0 7 8 9 10 1.0 11 1.0 16 1.0 10 11 12 13 14 1.0 15 1.0 17 1.0 14 15 16 17 18 1.0 19 1.0 20 1.0 18 19 20	C -1.235362 0.339872 0.459578 C 0.000000 0.435444 -0.166438 H -0.000001 0.603650 -1.246423 C 1.235363 0.339875 0.459576 H 1.259409 0.168672 1.537031 C 2.558272 0.439735 -0.238142 H 3.125541 1.296427 0.160734 H 2.399938 0.646884 -1.304592 C 3.423730 -0.825552 -0.080671 H 2.926317 -1.697755 -0.518931 H 3.610461 -1.045550 0.977215 H -1.259406 0.168670 1.537033 C -2.558271 0.439736 -0.238139 H -2.399…	46.3650 57.2691 140.1898 154.4810 196.4431 233.1402 271.8302 326.9379 395.2303 474.4216 480.0550 745.1563 766.7749 797.2032 798.1083 894.9881 928.5263 989.0698 1012.1697 1033.0001 1077.7974 1080.3032 1116.1113 1186.0583 1222.2697 1270.3018 1284.3949 1314.0171 1324.2394 1348.6577 1376.8816 1432.6295 1433.5095 1482.8926 1507.4856 1510.4242 1526.6101 1527.3131 1534.9205 1537.1606 1548.6927 2995.6349…	2	0	0	0	0	2	0	1	0	0	0	0	0	2	0	0	0	0.00247875	0	0	0	0	0.00496979	0	0.0995741	0	0	0	0	0	0.099821	0	0	0	0
159	[CH3][CH2]/[CH]=[CH]/[CH2][CH2][CH2]	C7H13	20	-274.495	-274.316	-274.305	-274.445	-274.269	-274.259	31.3441	2	1 2 2.0 12 1.0 13 1.0 2 3 1.0 4 1.0 3 4 5 1.0 6 1.0 7 1.0 5 6 7 8 1.0 9 1.0 10 1.0 8 9 10 11 1.0 16 1.0 11 12 13 14 1.0 15 1.0 17 1.0 14 15 16 17 18 1.0 19 1.0 20 1.0 18 19 20	C 1.117042 -0.017216 -0.363633 C 0.041136 0.080500 0.422266 H 0.109760 0.678737 1.334517 C -1.295108 -0.555006 0.152850 H -1.554591 -1.236490 0.978078 H -1.242948 -1.169518 -0.754494 C -2.436121 0.478451 0.006892 H -2.208230 1.156583 -0.826955 H -2.434917 1.121236 0.908724 C -3.778052 -0.143054 -0.182840 H -4.038425 -1.063773 0.332306 H 1.048447 -0.615422 -1.275877 C 2.455673 0.616200 -0.095359 H…	52.2538 91.0890 95.5110 114.9074 131.2617 215.9405 285.7827 314.2253 326.9205 451.5452 472.2253 530.7981 748.9271 773.2406 826.0305 891.9364 907.6021 982.8864 1015.0684 1026.0107 1073.5008 1089.6810 1105.0174 1112.2794 1150.5573 1216.8387 1288.6231 1303.0544 1312.4190 1344.4924 1349.4153 1382.7451 1403.4335 1436.2860 1485.8045 1498.8399 1511.0341 1516.4944 1527.8665 1536.9022 1754.1273 2932.1722 …	0	0	0	2	1	1	0	0	0	0	0	0	0	3	0	0	0	0	0	0	0	0	0	0	0	0	0	0	0	0	0	0	0	0	0
160	[CH2][CH2]/[CH]=[CH]/[CH2][CH2][CH3]	C7H13	20	-274.495	-274.315	-274.305	-274.444	-274.269	-274.258	31.5545	2	1 2 2.0 13 1.0 14 1.0 2 3 1.0 4 1.0 3 4 5 1.0 6 1.0 7 1.0 5 6 7 8 1.0 9 1.0 10 1.0 8 9 10 11 1.0 12 1.0 17 1.0 11 12 13 14 15 1.0 16 1.0 18 1.0 15 16 17 18 19 1.0 20 1.0 19 20	C 1.254987 -0.054913 -0.362600 C 0.187650 0.081448 0.428877 H 0.273955 0.702576 1.324108 C -1.162174 -0.537456 0.187554 H -1.423412 -1.191208 1.034832 H -1.121305 -1.182724 -0.700465 C -2.283953 0.504809 0.014905 H -2.043150 1.148469 -0.841423 H -2.304155 1.162625 0.895196 C -3.663780 -0.130227 -0.182346 H -3.939915 -0.754151 0.676790 H -3.682639 -0.769151 -1.073900 H 1.178915 -0.677685 -1.255888…	52.6049 88.4493 97.1020 117.8746 137.3484 245.9498 285.5515 289.8871 324.5309 441.5070 495.3886 524.8078 748.7787 774.9695 829.5982 889.1298 907.4155 1001.6257 1015.5835 1022.8824 1053.5579 1087.7769 1105.8863 1122.7125 1148.7014 1224.6534 1272.0638 1309.5747 1329.6508 1344.4110 1351.0411 1374.3989 1408.0974 1440.1460 1483.1743 1488.3954 1508.9330 1522.8724 1529.2822 1539.1928 1749.7061 2951.1535…	0	0	0	2	1	1	0	0	0	0	0	0	0	3	0	0	0	0	0	0	0	0	0	0	0	0	0	0	0	0	0	0	0	0	0
161	[CH3][CH2]/C=[CH]/[CH2][CH2][CH3]	C7H13	20	-274.488	-274.307	-274.296	-274.436	-274.259	-274.248	37.7918	2	1 2 2.0 13 1.0 2 3 1.0 4 1.0 3 4 5 1.0 6 1.0 7 1.0 5 6 7 8 1.0 9 1.0 10 1.0 8 9 10 11 1.0 12 1.0 16 1.0 11 12 13 14 1.0 15 1.0 17 1.0 14 15 16 17 18 1.0 19 1.0 20 1.0 18 19 20	C 1.207735 0.079149 -0.191469 C 0.108627 0.188437 0.523836 H 0.114337 0.855363 1.400315 C -1.205930 -0.505439 0.246903 H -1.481659 -1.120324 1.117695 H -1.083719 -1.193527 -0.598328 C -2.353106 0.479069 -0.044869 H -2.090164 1.080312 -0.925057 H -2.444615 1.185944 0.791946 C -3.695825 -0.221605 -0.274026 H -3.994440 -0.805135 0.605765 H -3.642886 -0.911513 -1.125262 C 2.596897 0.579320 -0.217567 …	45.2120 78.5541 85.7598 133.1824 187.8937 244.2652 270.1525 282.6745 334.4067 464.1398 494.4481 744.5522 761.8387 799.7988 856.0095 901.1576 911.9627 991.5919 1046.5958 1066.3241 1086.3550 1103.5935 1123.2739 1156.4912 1252.7130 1281.3956 1304.7466 1332.4742 1339.7567 1366.0707 1402.4173 1435.0587 1439.8485 1488.4711 1508.7505 1522.7644 1525.6436 1529.1299 1534.8863 1539.0656 1777.9483 2957.2688 …	0	0	1	1	0	2	0	0	0	0	0	0	0	3	0	0	0	0	0	0	0	0	0	0	0	0	0	0	0	0	0	0	0	0	0
162	[CH3][CH2]/[CH]=C/[CH2][CH2][CH3]	C7H13	20	-274.488	-274.307	-274.296	-274.436	-274.259	-274.248	37.7761	2	1 2 2.0 12 1.0 13 1.0 2 3 1.0 3 4 1.0 5 1.0 6 1.0 4 5 6 7 1.0 8 1.0 9 1.0 7 8 9 10 1.0 11 1.0 16 1.0 10 11 12 13 14 1.0 15 1.0 17 1.0 14 15 16 17 18 1.0 19 1.0 20 1.0 18 19 20	C -1.244454 -0.030177 0.446397 C -0.112129 -0.054099 -0.223463 C 1.262100 -0.580445 -0.109614 H 1.472693 -1.259566 -0.949754 H 1.337212 -1.198916 0.804906 C 2.345336 0.517487 -0.070112 H 2.142746 1.184792 0.777119 H 2.259995 1.133005 -0.974564 C 3.760877 -0.055457 0.039963 H 3.994221 -0.705258 -0.812620 H 3.879336 -0.652148 0.952891 H -1.297669 -0.557231 1.412132 C -2.525366 0.643481 0.006549 H -…	46.0029 80.5176 83.4662 117.4387 202.6974 244.0771 273.4171 300.8559 327.1014 438.2742 505.1061 744.0504 761.6131 808.4481 867.7498 893.4721 901.2611 982.3222 1045.1417 1067.9005 1088.7101 1105.7448 1121.4568 1157.4822 1252.0451 1284.7565 1306.2979 1326.2056 1336.1005 1371.3287 1399.5883 1435.4187 1440.5739 1486.3454 1511.3312 1522.1264 1526.9257 1528.9210 1535.9715 1537.9313 1778.2109 2947.4232 …	0	0	1	1	0	2	0	0	0	0	0	0	0	3	0	0	0	0	0	0	0	0	0	0	0	0	0	0	0	0	0	0	0	0	0
163	CCCCC(=C)C	C7H14	21	-275.167	-274.972	-274.962	-275.116	-274.926	-274.915	-18.4278	1	1 2 2.0 12 1.0 13 1.0 2 3 1.0 18 1.0 3 4 1.0 5 1.0 6 1.0 4 5 6 7 1.0 8 1.0 9 1.0 7 8 9 10 1.0 11 1.0 14 1.0 10 11 12 13 14 15 1.0 16 1.0 17 1.0 15 16 17 18 19 1.0 20 1.0 21 1.0 19 20 21	C -2.561798 -1.054360 -0.446019 C -1.757080 -0.104550 0.042355 C -0.399157 -0.439673 0.624364 H -0.306706 -1.528653 0.724563 H -0.327986 -0.025218 1.642367 C 0.791881 0.087221 -0.201010 H 0.733559 1.181082 -0.286974 H 0.718460 -0.306167 -1.224605 C 2.150789 -0.294932 0.399595 H 2.214155 -1.389110 0.484645 H 2.215086 0.093484 1.426135 H -3.536357 -0.819492 -0.867664 H -2.276221 -2.103757 -0.441614…	48.5348 82.0503 123.4927 134.8242 189.5770 247.9705 285.1626 359.2150 398.3546 466.7783 538.7405 727.0750 743.6294 802.1675 837.5866 913.2178 922.9288 945.7447 986.5913 1028.1929 1032.2675 1066.5940 1078.5646 1134.7179 1146.7071 1252.8737 1293.1086 1308.4404 1336.4144 1346.1721 1378.5886 1414.9807 1440.7940 1441.2578 1473.0913 1505.4477 1515.0845 1517.5738 1527.6209 1529.8294 1530.1310 1541.9475 …	0	0	0	0	0	2	0	0	0	1	0	1	0	3	0	0	0	0	0	0	0	0	0	0	0	0	0	0	0	0	0	0	0	0	0
164	[CH3][CH][CH2][CH2]C(=[CH2])[CH3]	C7H13	20	-274.501	-274.321	-274.311	-274.451	-274.275	-274.265	27.5087	2	1 2 2.0 11 1.0 12 1.0 2 3 1.0 17 1.0 3 4 1.0 5 1.0 6 1.0 4 5 6 7 1.0 8 1.0 9 1.0 7 8 9 10 1.0 13 1.0 10 11 12 13 14 1.0 15 1.0 16 1.0 14 15 16 17 18 1.0 19 1.0 20 1.0 18 19 20	C -2.568913 -1.018264 -0.401355 C -1.723728 -0.091326 0.061972 C -0.356001 -0.463381 0.594870 H -0.284095 -1.554784 0.681725 H -0.233706 -0.058666 1.610588 C 0.819908 0.040833 -0.271641 H 0.789310 1.137919 -0.352780 H 0.668356 -0.327364 -1.304922 C 2.157279 -0.381539 0.246499 H 2.225718 -1.335958 0.766649 H -3.551848 -0.756997 -0.786446 H -2.309852 -2.074467 -0.411586 C 3.418813 0.265255 -0.22099…	39.9724 70.1304 81.4738 113.0760 150.8025 187.1554 284.1981 361.6120 390.6313 426.7313 467.8803 538.1429 726.3347 765.2517 835.5544 919.5248 925.0256 967.3661 986.7419 1013.6174 1033.3132 1059.3679 1084.6802 1129.5556 1155.1209 1195.1892 1287.3296 1300.2331 1331.7383 1372.7490 1424.2747 1439.0365 1441.8402 1472.9666 1498.5870 1505.0591 1509.8450 1516.7086 1520.9734 1528.1345 1735.1515 2934.5053 2…	0	0	0	0	0	2	0	0	0	1	0	1	1	2	0	0	0	0	0	0	0	0	0	0	0	0	0	0	0	0	0	0	0	0	0
165	[CH3][CH2][CH][CH2]C(=[CH2])[CH3]	C7H13	20	-274.501	-274.322	-274.311	-274.451	-274.276	-274.265	27.1818	2	1 2 2.0 11 1.0 12 1.0 2 3 1.0 17 1.0 3 4 1.0 5 1.0 6 1.0 4 5 6 7 1.0 8 1.0 7 8 9 1.0 10 1.0 13 1.0 9 10 11 12 13 14 1.0 15 1.0 16 1.0 14 15 16 17 18 1.0 19 1.0 20 1.0 18 19 20	C -2.702700 -0.756734 -0.509776 C -1.720031 -0.036992 0.040068 C -0.444000 -0.685163 0.546913 H -0.569920 -1.783311 0.523136 H -0.299675 -0.429115 1.609518 C 0.781808 -0.284061 -0.221320 H 0.691223 -0.201130 -1.304324 C 2.152979 -0.364538 0.369761 H 2.477901 -1.421409 0.437894 H 2.126495 -0.011734 1.412346 H -3.614118 -0.292897 -0.879525 H -2.633384 -1.837430 -0.609890 C 3.209320 0.422041 -0.4187…	39.8385 45.9568 79.5066 170.8389 189.9801 246.3597 284.3755 357.7498 386.2470 459.3788 467.2685 540.0460 727.6420 777.5269 827.8903 887.1266 923.4642 941.5209 986.6395 1034.2031 1037.0294 1076.5927 1078.3833 1128.9181 1153.3266 1206.8697 1281.8706 1287.1047 1312.2950 1373.4464 1430.6340 1436.6063 1439.0592 1469.7146 1491.3940 1503.0373 1508.4761 1526.1217 1527.8722 1535.0266 1737.4025 2928.0981 2…	0	0	0	0	0	2	0	0	0	1	0	1	1	2	0	0	0	0	0	0	0	0	0	0	0	0	0	0	0	0	0	0	0	0	0
166	[CH3][CH2][CH2][CH2]C(=[CH2])[CH2]	C7H13	20	-274.518	-274.338	-274.328	-274.465	-274.289	-274.279	18.6002	2	1 2 1.5 12 1.0 13 1.0 2 3 1.0 18 1.5 3 4 1.0 5 1.0 6 1.0 4 5 6 7 1.0 8 1.0 9 1.0 7 8 9 10 1.0 11 1.0 14 1.0 10 11 12 13 14 15 1.0 16 1.0 17 1.0 15 16 17 18 19 1.0 20 1.0 19 20	C -2.388169 -1.213256 -0.254152 C -1.792091 -0.000001 0.071352 C -0.438969 0.000003 0.768718 H -0.361439 -0.879456 1.421278 H -0.361444 0.879463 1.421277 C 0.743470 0.000007 -0.218301 H 0.663344 0.877991 -0.874718 H 0.663338 -0.877968 -0.874729 C 2.111033 -0.000005 0.475771 H 2.183987 -0.878110 1.133346 H 2.183991 0.878090 1.133360 H -3.336253 -1.251696 -0.782966 H -1.929287 -2.161427 0.009518 C …	33.3562 85.9579 118.3612 132.5649 247.5843 283.9484 366.3131 406.7234 460.0567 544.7492 553.6183 600.6844 743.5163 757.6074 793.7882 804.6881 876.1120 922.0586 943.0690 996.3949 1021.9521 1057.9351 1067.2050 1108.4356 1132.9354 1245.2506 1290.6165 1317.3119 1343.2535 1366.2736 1378.8859 1401.3533 1415.5499 1441.3318 1514.8652 1514.8690 1519.0702 1529.8076 1531.9169 1542.3947 1556.0793 3021.3502 3…	0	1	0	0	0	1	2	0	0	0	0	0	0	3	0	0	0	0	0	0	0	0	0	0	0	0	0	0	0	0	0	0	0	0	0
167	[CH2][CH2][CH2][CH2]C(=[CH2])[CH3]	C7H13	20	-274.494	-274.315	-274.304	-274.446	-274.271	-274.26	30.4959	2	1 2 2.0 12 1.0 13 1.0 2 3 1.0 17 1.0 3 4 1.0 5 1.0 6 1.0 4 5 6 7 1.0 8 1.0 9 1.0 7 8 9 10 1.0 11 1.0 14 1.0 10 11 12 13 14 15 1.0 16 1.0 15 16 17 18 1.0 19 1.0 20 1.0 18 19 20	C -2.484893 -1.076736 -0.419997 C -1.691041 -0.107800 0.048116 C -0.324550 -0.414751 0.625538 H -0.217449 -1.500245 0.747556 H -0.249690 0.022117 1.633840 C 0.850706 0.109555 -0.222687 H 0.782487 1.198994 -0.334303 H 0.777800 -0.311466 -1.234852 C 2.222524 -0.244080 0.378723 H 2.266745 -1.342197 0.517785 H 2.300227 0.173711 1.393369 H -3.465461 -0.862522 -0.838619 H -2.184161 -2.121724 -0.401140 …	49.0448 81.7562 111.1886 131.6501 137.3982 189.4356 285.8037 361.4107 397.3382 456.6533 475.0358 540.3937 726.1258 738.9085 816.3322 840.8027 916.3770 924.9783 986.4200 1006.9676 1039.2340 1061.5110 1080.9237 1091.8586 1138.3914 1178.4504 1278.6796 1300.8179 1318.7925 1341.1845 1374.3536 1408.4241 1440.9921 1473.0542 1487.4183 1499.2993 1505.5837 1515.2317 1527.9224 1532.7884 1735.2071 2928.8983 …	0	0	0	0	1	1	0	0	0	1	0	1	0	3	0	0	0	0	0	0	0	0	0	0	0	0	0	0	0	0	0	0	0	0	0
168	[CH3][CH2][CH2][CH2]C(=[CH])[CH3]	C7H13	20	-274.48	-274.298	-274.288	-274.431	-274.254	-274.244	40.7967	2	1 2 2.0 12 1.0 2 3 1.0 17 1.0 3 4 1.0 5 1.0 6 1.0 4 5 6 7 1.0 8 1.0 9 1.0 7 8 9 10 1.0 11 1.0 13 1.0 10 11 12 13 14 1.0 15 1.0 16 1.0 14 15 16 17 18 1.0 19 1.0 20 1.0 18 19 20	C -2.591954 -1.079176 -0.513719 C -1.821335 -0.141977 0.000514 C -0.455556 -0.482039 0.595685 H -0.351771 -1.571157 0.674045 H -0.413042 -0.088635 1.623372 C 0.733516 0.079411 -0.206040 H 0.657285 1.173286 -0.272725 H 0.678241 -0.296924 -1.236966 C 2.091504 -0.291647 0.404682 H 2.172113 -1.385980 0.470533 H 2.137394 0.079153 1.438616 H -2.533475 -2.152947 -0.651401 C 3.279150 0.261285 -0.389817 H…	49.1100 82.4332 123.3685 136.0727 184.5461 247.8727 281.5410 348.1133 380.5751 441.4585 525.4380 689.7933 743.1805 799.4209 810.9856 889.1621 910.3356 938.6668 1018.7865 1026.3619 1059.7862 1065.5848 1132.2395 1141.7849 1212.8474 1258.1405 1289.7008 1328.6324 1345.4864 1372.4388 1413.7399 1433.6860 1441.2716 1504.2175 1513.7700 1516.7667 1517.8199 1528.9073 1529.8526 1541.5711 1703.4482 3010.7655…	0	0	0	0	0	2	0	0	1	0	0	1	0	3	0	0	0	0	0	0	0	0	0	0	0	0	0	0	0	0	0	0	0	0	0
169	CCC[C@@H](C)C=C	C7H14	21	-275.163	-274.968	-274.958	-275.113	-274.923	-274.913	-16.609	1	1 2 2.0 11 1.0 12 1.0 2 3 1.0 17 1.0 3 4 1.0 5 1.0 18 1.0 4 5 6 1.0 7 1.0 8 1.0 6 7 8 9 1.0 10 1.0 13 1.0 9 10 11 12 13 14 1.0 15 1.0 16 1.0 14 15 16 17 18 19 1.0 20 1.0 21 1.0 19 20 21	C 1.927097 -1.797692 -0.111966 C 1.414184 -0.702971 0.451198 C 0.812598 0.469714 -0.283681 H 0.847509 0.251768 -1.361384 C -0.665072 0.692730 0.112242 H -1.015505 1.622458 -0.359294 H -0.721410 0.864551 1.198378 C -1.608684 -0.453419 -0.272337 H -1.259020 -1.385332 0.189670 H -1.553751 -0.615233 -1.358542 H 2.357359 -2.600724 0.480974 H 1.938591 -1.932782 -1.191949 C -3.063116 -0.190570 0.131340 …	75.7789 88.3803 111.6572 178.4374 235.1000 248.4857 289.8813 323.5560 355.4024 412.2455 516.5402 698.2639 752.6156 820.6238 883.8296 903.2502 937.5892 959.4741 998.6099 1039.5871 1046.4580 1051.8316 1068.0325 1131.8487 1180.2678 1222.4821 1274.6841 1311.4765 1329.2441 1343.5150 1362.9124 1370.8638 1414.4268 1434.9561 1441.1135 1479.4377 1513.0887 1523.7787 1526.3710 1529.8914 1531.5311 1540.8211 …	0	0	0	1	0	2	0	0	0	1	0	0	0	2	0	1	0	0	0	0	0	0	0	0	0	0	0	0	0	0	0	0	0	0	0
170	[CH3][CH][CH2][C@@H]([CH3])[CH]=[CH2]	C7H13	20	-274.497	-274.317	-274.307	-274.448	-274.273	-274.262	29.0351	2	1 2 2.0 10 1.0 11 1.0 2 3 1.0 16 1.0 3 4 1.0 5 1.0 17 1.0 4 5 6 1.0 7 1.0 8 1.0 6 7 8 9 1.0 12 1.0 9 10 11 12 13 1.0 14 1.0 15 1.0 13 14 15 16 17 18 1.0 19 1.0 20 1.0 18 19 20	C 1.876720 -1.812985 -0.151378 C 1.398490 -0.711904 0.430214 C 0.774344 0.460862 -0.283901 H 0.747302 0.233803 -1.358677 C -0.682160 0.698361 0.188181 H -1.057851 1.627124 -0.270631 H -0.658761 0.913059 1.276400 C -1.623788 -0.423304 -0.106617 H -1.222597 -1.433259 -0.144190 H 2.326836 -2.617312 0.424814 H 1.838977 -1.951207 -1.230319 C -3.102573 -0.236577 -0.027401 H -3.419539 0.702841 -0.502691…	57.9058 88.2848 93.5426 135.1504 186.5461 232.6818 288.4571 316.2514 353.6602 412.4803 421.9514 512.4071 698.5237 812.9021 877.7117 913.9150 937.9414 963.5372 995.2416 1010.5063 1040.1471 1056.1733 1109.1082 1132.6187 1156.7447 1196.3790 1248.7426 1304.0165 1332.2269 1356.4171 1359.7519 1423.8122 1433.8126 1441.0653 1479.1674 1496.5242 1505.2245 1516.9527 1525.9937 1529.7950 1727.8459 2910.7895 2…	0	0	0	1	0	2	0	0	0	1	0	0	1	1	0	1	0	0	0	0	0	0	0	0	0	0	0	0	0	0	0	0	0	0	0
171	[CH3][CH2][CH2][C@@H]([CH3])C=[CH2]	C7H13	20	-274.484	-274.303	-274.293	-274.434	-274.258	-274.248	38.1032	2	1 2 2.0 11 1.0 12 1.0 2 3 1.0 3 4 1.0 5 1.0 17 1.0 4 5 6 1.0 7 1.0 8 1.0 6 7 8 9 1.0 10 1.0 13 1.0 9 10 11 12 13 14 1.0 15 1.0 16 1.0 14 15 16 17 18 1.0 19 1.0 20 1.0 18 19 20	C 1.978584 1.858746 -0.029226 C 1.425193 0.710675 -0.347779 C 0.828264 -0.490376 0.278683 H 0.848547 -0.332977 1.374979 C -0.648590 -0.689673 -0.138512 H -1.001512 -1.633177 0.301514 H -0.691608 -0.820422 -1.229083 C -1.584876 0.449279 0.280812 H -1.222457 1.392093 -0.147753 H -1.537207 0.572079 1.372564 H 2.352851 2.556628 -0.777747 H 2.094311 2.176455 1.014460 C -3.037842 0.212335 -0.143291 H -…	75.8225 87.2173 112.9442 178.2886 217.4780 248.1568 264.8035 297.5540 353.9433 398.1068 489.0735 605.7522 749.4303 792.4197 881.0012 883.1996 901.2824 952.3352 981.0010 1025.2669 1051.6705 1066.5142 1127.7003 1166.5659 1181.5734 1266.6834 1301.4707 1330.4912 1350.4451 1357.2545 1413.3115 1434.0937 1441.3924 1447.5270 1511.9243 1523.3601 1524.4000 1529.8878 1531.0209 1540.4969 1754.2489 2926.5546 …	0	0	1	0	0	2	0	0	0	1	0	0	0	2	0	1	0	0	0	0	0	0	0	0	0	0	0	0	0	0	0	0	0	0	0
172	[CH3][CH2][CH2][C@@H]([CH3])[CH]=[CH]	C7H13	20	-274.476	-274.295	-274.285	-274.429	-274.252	-274.242	41.6202	2	1 2 2.0 11 1.0 2 3 1.0 16 1.0 3 4 1.0 5 1.0 17 1.0 4 5 6 1.0 7 1.0 8 1.0 6 7 8 9 1.0 10 1.0 12 1.0 9 10 11 12 13 1.0 14 1.0 15 1.0 13 14 15 16 17 18 1.0 19 1.0 20 1.0 18 19 20	C -1.885414 1.883129 -0.195086 C -1.430280 0.800082 0.390867 C -0.856524 -0.423260 -0.301670 H -0.872607 -0.235299 -1.383330 C 0.606399 -0.674818 0.125493 H 0.931947 -1.633930 -0.303088 H 0.642852 -0.803420 1.218517 C 1.591270 0.423578 -0.293288 H 1.265482 1.384757 0.123853 H 1.555246 0.540623 -1.385795 H -2.328080 2.825003 0.104831 C 3.030894 0.132079 0.142486 H 3.395899 -0.808267 -0.289234 H 3.…	74.1552 88.8368 112.4742 178.7056 236.4977 248.6479 302.1946 321.4432 355.7954 423.5161 506.7022 680.0932 744.2826 771.1612 834.2280 877.6670 886.3276 920.1243 968.3518 1028.9136 1050.8664 1066.4938 1130.3473 1172.7713 1180.0307 1250.6830 1287.5985 1312.0436 1342.6551 1366.5053 1375.5518 1414.5948 1435.0933 1441.1625 1512.0073 1523.3668 1525.6384 1529.5461 1530.5890 1540.4599 1689.6555 3008.7338 …	0	0	0	1	0	2	0	0	1	0	0	0	0	2	0	1	0	0	0	0	0	0	0	0	0	0	0	0	0	0	0	0	0	0	0
173	[CH3][CH2][CH][C@@H]([CH3])[CH]=[CH2]	C7H13	20	-274.496	-274.317	-274.306	-274.447	-274.272	-274.261	29.7177	2	1 2 2.0 10 1.0 11 1.0 2 3 1.0 16 1.0 3 4 1.0 5 1.0 17 1.0 4 5 6 1.0 7 1.0 6 7 8 1.0 9 1.0 12 1.0 8 9 10 11 12 13 1.0 14 1.0 15 1.0 13 14 15 16 17 18 1.0 19 1.0 20 1.0 18 19 20	C 2.014387 -1.730624 -0.094269 C 1.551185 -0.605786 0.454417 C 0.782282 0.479355 -0.279144 H 0.786340 0.219878 -1.348719 C -0.643979 0.498115 0.202918 H -0.859825 1.051062 1.118094 C -1.659244 -0.485130 -0.285432 H -1.412580 -1.497775 0.085158 H -1.594691 -0.566554 -1.382191 H 2.540055 -2.480155 0.491779 H 1.889969 -1.943086 -1.154503 C -3.096723 -0.139475 0.124181 H -3.397330 0.835491 -0.276201 …	29.6426 63.2026 98.1042 184.6894 233.6568 243.4270 267.4018 299.0465 344.5299 416.3315 464.0283 520.4836 700.4822 779.3579 844.8179 893.5054 928.9083 967.3751 1001.2723 1033.2533 1051.2501 1060.7778 1078.2938 1144.6708 1180.4198 1188.4220 1273.5401 1287.3127 1322.6149 1334.2091 1367.8580 1426.1920 1435.6776 1439.2302 1470.7636 1502.9357 1524.5444 1527.1981 1528.2012 1535.2951 1713.5077 2948.7055 …	0	0	0	1	0	2	0	0	0	1	0	0	1	1	0	1	0	0	0	0	0	0	0	0	0	0	0	0	0	0	0	0	0	0	0
174	[CH2][CH2][CH2][C@@H]([CH3])[CH]=[CH2]	C7H13	20	-274.49	-274.311	-274.3	-274.443	-274.268	-274.257	32.2077	2	1 2 2.0 11 1.0 12 1.0 2 3 1.0 16 1.0 3 4 1.0 5 1.0 17 1.0 4 5 6 1.0 7 1.0 8 1.0 6 7 8 9 1.0 10 1.0 13 1.0 9 10 11 12 13 14 1.0 15 1.0 14 15 16 17 18 1.0 19 1.0 20 1.0 18 19 20	C 1.865143 -1.795193 -0.119525 C 1.356843 -0.701375 0.449613 C 0.747365 0.471077 -0.279369 H 0.769901 0.252278 -1.357325 C -0.724746 0.693861 0.133675 H -1.086933 1.615640 -0.343629 H -0.773802 0.871637 1.217668 C -1.668155 -0.463621 -0.234155 H -1.319362 -1.392746 0.236698 H -1.578983 -0.648980 -1.323055 H 2.301492 -2.598459 0.468579 H 1.867219 -1.928980 -1.199746 C -3.092233 -0.207359 0.127560 …	79.1752 87.0678 112.8974 123.0492 181.0554 234.5962 290.6373 323.2374 354.4509 415.3947 457.6474 521.1431 697.0433 753.7433 819.0725 894.8231 937.0159 940.3198 988.1594 1005.1626 1040.2625 1047.2573 1093.1569 1115.1432 1126.0811 1191.6213 1236.1017 1306.1074 1313.2443 1335.9935 1356.9546 1369.3666 1408.9379 1434.8349 1479.3320 1488.1225 1499.5524 1518.7450 1526.6470 1531.5755 1728.7962 2924.5560 …	0	0	0	1	1	1	0	0	0	1	0	0	0	2	0	1	0	0	0	0	0	0	0	0	0	0	0	0	0	0	0	0	0	0	0
175	[CH3][CH2][CH2][C@@H]([CH2])[CH]=[CH2]	C7H13	20	-274.49	-274.31	-274.3	-274.442	-274.267	-274.256	32.7999	2	1 2 2.0 11 1.0 12 1.0 2 3 1.0 17 1.0 3 4 1.0 5 1.0 18 1.0 4 5 6 1.0 7 1.0 8 1.0 6 7 8 9 1.0 10 1.0 13 1.0 9 10 11 12 13 14 1.0 15 1.0 16 1.0 14 15 16 17 18 19 1.0 20 1.0 19 20	C 2.068440 -1.663327 -0.085871 C 1.455986 -0.614371 0.467013 C 0.810096 0.530791 -0.294510 H 0.863986 0.283893 -1.366316 C -0.674650 0.715689 0.092508 H -1.047989 1.625774 -0.397315 H -0.737703 0.904354 1.175309 C -1.575920 -0.469215 -0.274332 H -1.193544 -1.381074 0.201763 H -1.515136 -0.645305 -1.357935 H 2.533542 -2.438590 0.517541 H 2.128634 -1.786681 -1.165544 C -3.038727 -0.251427 0.125720 …	77.9426 89.8343 110.7453 133.6219 184.2871 248.2843 282.2006 320.3985 341.0464 414.4167 498.5340 539.0928 697.7324 752.6756 824.5321 876.3687 921.0480 930.9783 948.9380 1033.3179 1040.9004 1049.9935 1078.3006 1100.5051 1163.2663 1196.7352 1270.9464 1302.1535 1316.4636 1334.2381 1347.8456 1368.0024 1415.6395 1441.0668 1468.7158 1481.8182 1515.3651 1524.4743 1530.0513 1540.5633 1711.4970 3003.5887 …	0	0	0	1	1	1	0	0	0	1	0	0	0	2	0	1	0	0	0	0	0	0	0	0	0	0	0	0	0	0	0	0	0	0	0
176	C=CC[C@@H](C)CC	C7H14	21	-275.161	-274.967	-274.957	-275.112	-274.922	-274.912	-16.3798	1	1 2 2.0 10 1.0 11 1.0 2 3 1.0 16 1.0 3 4 1.0 5 1.0 17 1.0 4 5 6 1.0 7 1.0 18 1.0 6 7 8 1.0 9 1.0 12 1.0 8 9 10 11 12 13 1.0 14 1.0 15 1.0 13 14 15 16 17 18 19 1.0 20 1.0 21 1.0 19 20 21	C -3.190642 0.112345 0.149310 C -2.097533 -0.350017 -0.459540 C -0.824365 -0.768824 0.223754 H -0.653313 -1.838667 0.027383 C 0.429693 0.012318 -0.241766 H 0.476945 -0.063973 -1.340385 C 1.703924 -0.645730 0.324287 H 1.675953 -1.719113 0.089367 H 1.683875 -0.574891 1.422118 H -4.082587 0.390837 -0.405972 H -3.237426 0.224851 1.230897 C 3.020429 -0.061032 -0.200250 H 3.153380 0.984814 0.096870 H 3…	71.6967 80.9022 105.2728 193.0766 215.9317 258.4595 296.4326 349.2001 401.0746 438.3479 471.8507 644.1981 782.1256 841.6050 894.9230 905.7517 937.8269 963.6518 985.7574 1018.6934 1038.2551 1055.5856 1070.8464 1153.7108 1182.1275 1208.7319 1267.8273 1300.0403 1319.3307 1341.1886 1372.6032 1394.5150 1403.5262 1440.0537 1442.4078 1475.1827 1506.0378 1516.6041 1526.7210 1530.4219 1536.7504 1542.1446 …	0	0	0	1	0	2	0	0	0	1	0	0	0	2	0	1	0	0	0	0	0	0	0	0	0	0	0	0	0	0	0	0	0	0	0
177	[CH2]=C[CH2][C@@H]([CH3])[CH2][CH3]	C7H13	20	-274.483	-274.302	-274.292	-274.434	-274.258	-274.248	38.1053	2	1 2 2.0 10 1.0 11 1.0 2 3 1.0 3 4 1.0 5 1.0 16 1.0 4 5 6 1.0 7 1.0 17 1.0 6 7 8 1.0 9 1.0 12 1.0 8 9 10 11 12 13 1.0 14 1.0 15 1.0 13 14 15 16 17 18 1.0 19 1.0 20 1.0 18 19 20	C -3.295770 0.091527 -0.036043 C -2.111017 -0.355337 -0.386164 C -0.835873 -0.802382 0.205102 H -0.672791 -1.859936 -0.049691 C 0.402938 0.015839 -0.244415 H 0.430966 -0.016147 -1.343900 C 1.687742 -0.653240 0.281648 H 1.667330 -1.716657 0.004217 H 1.680717 -0.625877 1.381618 H -4.067972 0.337813 -0.764270 H -3.572137 0.237017 1.015709 C 2.991304 -0.034620 -0.235858 H 3.116946 1.000259 0.100105 H…	71.0904 82.8432 100.0344 199.6768 219.2335 254.3992 287.6835 328.3790 358.9566 430.4032 430.9748 557.4983 781.6830 834.9079 874.8732 881.3572 895.1064 950.2398 986.5203 1013.3168 1032.7581 1058.3467 1144.4599 1156.6417 1190.9331 1247.1957 1300.2498 1320.4287 1360.0832 1394.7144 1402.3795 1439.7809 1442.6722 1445.2860 1481.6542 1514.8732 1526.5594 1529.9360 1536.7823 1542.4196 1757.8835 2942.1527 …	0	0	1	0	0	2	0	0	0	1	0	0	0	2	0	1	0	0	0	0	0	0	0	0	0	0	0	0	0	0	0	0	0	0	0
178	[CH2]=[CH][CH2][C@@H]([CH3])[CH2][CH2]	C7H13	20	-274.49	-274.31	-274.3	-274.443	-274.268	-274.258	31.735	2	1 2 2.0 10 1.0 11 1.0 2 3 1.0 15 1.0 3 4 1.0 5 1.0 16 1.0 4 5 6 1.0 7 1.0 17 1.0 6 7 8 1.0 9 1.0 12 1.0 8 9 10 11 12 13 1.0 14 1.0 13 14 15 16 17 18 1.0 19 1.0 20 1.0 18 19 20	C -3.128842 0.114456 0.162663 C -2.039568 -0.334314 -0.462899 C -0.765366 -0.774739 0.204463 H -0.597190 -1.839793 -0.019602 C 0.485565 0.016276 -0.246470 H 0.540733 -0.046299 -1.345250 C 1.769357 -0.638322 0.316424 H 1.723873 -1.721732 0.091993 H 1.760634 -0.568901 1.414137 H -4.021850 0.410850 -0.381450 H -3.171066 0.197916 1.247033 C 3.037518 -0.066002 -0.221063 H 3.934609 -0.003701 0.386262 H…	72.8663 86.6965 106.5952 124.6817 192.6691 239.5297 281.7346 345.2951 400.4292 421.9443 457.4540 495.7271 645.5137 823.3731 839.4445 896.0975 918.4793 938.3239 964.1052 982.7236 1036.4255 1066.0005 1084.7139 1106.4286 1157.1452 1197.1587 1244.4916 1276.6305 1298.1780 1337.9366 1365.8810 1388.8085 1397.7677 1437.6752 1475.0297 1486.7739 1496.2624 1510.0842 1527.7414 1529.9430 1731.2448 2931.2969 2…	0	0	0	1	1	1	0	0	0	1	0	0	0	2	0	1	0	0	0	0	0	0	0	0	0	0	0	0	0	0	0	0	0	0	0
179	[CH2]=[CH][CH2]C([CH2][CH3])[CH3]	C7H13	20	-274.5	-274.321	-274.31	-274.45	-274.274	-274.264	28.2739	2	1 2 2.0 9 1.0 10 1.0 2 3 1.0 15 1.0 3 4 1.0 5 1.0 16 1.0 4 5 6 1.0 17 1.0 6 7 1.0 8 1.0 11 1.0 7 8 9 10 11 12 1.0 13 1.0 14 1.0 12 13 14 15 16 17 18 1.0 19 1.0 20 1.0 18 19 20	C -2.937949 -0.328109 -0.320829 C -1.678903 -0.737842 -0.157081 C -0.721013 -0.211360 0.890391 H -0.374187 -1.048113 1.513989 C 0.473129 0.498838 0.300908 C 1.862701 -0.034626 0.501446 H 1.938138 -0.532630 1.479377 H 2.581310 0.797654 0.520829 H -3.576553 -0.732474 -1.101931 H -3.381469 0.424870 0.328285 C 2.310978 -1.035817 -0.589039 H 2.278087 -0.575004 -1.582897 H 3.336937 -1.379511 -0.408583 …	14.9716 30.1782 70.1287 94.7986 150.9340 231.5042 265.8489 354.6971 392.5262 426.6097 435.3719 629.2279 770.4489 795.1107 905.5108 918.8786 934.0805 953.7536 999.5623 1014.5875 1032.5102 1055.3769 1062.2588 1103.2546 1221.1785 1258.0130 1293.7498 1333.1591 1345.6760 1353.2419 1373.5176 1429.4360 1435.6188 1467.9925 1493.4565 1506.2300 1514.1113 1516.8761 1527.3657 1534.7567 1720.5368 2959.6754 29…	0	0	0	1	0	2	0	0	0	1	0	0	0	2	1	0	0	0	0	0	0	0	0	0	0	0	0	0	0	0	0	0	0	0	0
180	[CH2]=[CH][CH2][C@@H]([CH2])[CH2][CH3]	C7H13	20	-274.489	-274.309	-274.299	-274.443	-274.267	-274.257	32.4308	2	1 2 2.0 10 1.0 11 1.0 2 3 1.0 16 1.0 3 4 1.0 5 1.0 17 1.0 4 5 6 1.0 7 1.0 18 1.0 6 7 8 1.0 9 1.0 12 1.0 8 9 10 11 12 13 1.0 14 1.0 15 1.0 13 14 15 16 17 18 19 1.0 20 1.0 19 20	C 3.170673 0.153527 -0.155808 C 2.090461 -0.339221 0.451571 C 0.819440 -0.759306 -0.232277 H 0.632276 -1.823813 -0.020978 C -0.441342 0.041894 0.233018 H -0.478514 -0.051480 1.331983 C -1.722999 -0.596440 -0.339358 H -1.703989 -1.676157 -0.138056 H -1.713124 -0.489275 -1.434079 H 4.061729 0.436452 0.398626 H 3.206701 0.289139 -1.235048 C -3.015890 0.001198 0.225003 H -3.083538 1.075124 0.018615 H…	66.8669 80.1416 105.1808 121.4388 187.5721 229.0740 280.7188 341.0371 384.7786 435.5606 459.4254 539.4422 653.7384 791.4499 840.3466 900.9475 930.5455 937.5720 965.1884 1002.5129 1016.7799 1037.4479 1057.6380 1113.6136 1153.5841 1197.8108 1250.9529 1287.6270 1310.5287 1340.0775 1351.4424 1384.2226 1400.0871 1440.3170 1473.5715 1486.3394 1507.2091 1521.5012 1527.3646 1536.8357 1732.1730 2976.8454 …	0	0	0	1	1	1	0	0	0	1	0	0	0	2	0	1	0	0	0	0	0	0	0	0	0	0	0	0	0	0	0	0	0	0	0
181	[CH]=[CH][CH2][C@@H]([CH3])[CH2][CH3]	C7H13	20	-274.474	-274.294	-274.284	-274.428	-274.252	-274.242	41.9806	2	1 2 2.0 10 1.0 2 3 1.0 15 1.0 3 4 1.0 5 1.0 16 1.0 4 5 6 1.0 7 1.0 17 1.0 6 7 8 1.0 9 1.0 11 1.0 8 9 10 11 12 1.0 13 1.0 14 1.0 12 13 14 15 16 17 18 1.0 19 1.0 20 1.0 18 19 20	C 3.231155 0.132022 -0.193898 C 2.165075 -0.346401 0.406057 C 0.876426 -0.768498 -0.264020 H 0.715785 -1.838275 -0.062947 C -0.365864 0.015255 0.224101 H -0.390209 -0.054697 1.323985 C -1.650448 -0.647980 -0.312218 H -1.617203 -1.719698 -0.070526 H -1.652227 -0.584411 -1.410570 H 4.218729 0.471840 0.093146 C -2.956389 -0.060143 0.234820 H -3.095799 0.983480 -0.066973 H -3.821381 -0.625223 -0.1308…	72.4066 82.0140 104.7531 199.4143 214.9822 258.6373 299.2083 350.0887 398.6651 439.3298 466.0241 649.6080 780.6120 806.5316 809.2188 849.1015 898.7930 930.7566 985.5123 1014.5339 1039.6211 1059.7448 1145.7642 1157.7758 1191.2354 1241.5780 1291.7972 1302.6871 1325.7388 1373.5911 1394.0512 1403.1108 1440.0932 1442.5671 1504.5244 1516.3270 1526.7592 1530.0902 1536.6901 1542.0430 1693.6924 2993.1858 …	0	0	0	1	0	2	0	0	1	0	0	0	0	2	0	1	0	0	0	0	0	0	0	0	0	0	0	0	0	0	0	0	0	0	0
182	[CH2]=[CH][CH2][C@@H]([CH3])[CH][CH3]	C7H13	20	-274.496	-274.316	-274.306	-274.447	-274.272	-274.261	29.6841	2	1 2 2.0 9 1.0 10 1.0 2 3 1.0 15 1.0 3 4 1.0 5 1.0 16 1.0 4 5 6 1.0 7 1.0 17 1.0 6 7 8 1.0 11 1.0 8 9 10 11 12 1.0 13 1.0 14 1.0 12 13 14 15 16 17 18 1.0 19 1.0 20 1.0 18 19 20	C 3.160479 0.026862 -0.117691 C 2.041905 -0.414517 0.459666 C 0.766826 -0.766048 -0.256545 H 0.544181 -1.830688 -0.092823 C -0.465523 0.053558 0.208460 H -0.539674 -0.042271 1.304469 C -1.728521 -0.490521 -0.392788 H -1.691252 -0.820000 -1.431143 H 4.052855 0.254864 0.459496 H 3.228710 0.171545 -1.194289 C -3.068288 -0.264570 0.226616 H -3.477101 0.737226 -0.000800 H -3.808433 -0.989648 -0.132698…	46.0886 71.4609 91.1321 114.6999 191.2375 239.4832 280.3923 320.6339 389.1554 401.5957 477.2382 514.5911 645.0775 840.3768 890.6137 906.2045 937.9414 962.1134 985.8540 1012.2552 1032.8530 1051.5595 1095.5186 1110.3837 1176.9688 1195.6779 1263.6424 1293.6269 1334.0551 1350.8035 1365.6445 1417.4955 1432.7850 1438.6941 1474.9307 1504.1721 1509.2041 1516.7818 1527.3426 1528.0350 1730.8739 2958.4972 2…	0	0	0	1	0	2	0	0	0	1	0	0	1	1	0	1	0	0	0	0	0	0	0	0	0	0	0	0	0	0	0	0	0	0	0
183	C=CCCC(C)C	C7H14	21	-275.162	-274.967	-274.957	-275.112	-274.922	-274.912	-16.302	1	1 2 2.0 9 1.0 10 1.0 2 3 1.0 15 1.0 3 4 1.0 5 1.0 16 1.0 4 5 6 1.0 7 1.0 17 1.0 6 7 8 1.0 11 1.0 18 1.0 8 9 10 11 12 1.0 13 1.0 14 1.0 12 13 14 15 16 17 18 19 1.0 20 1.0 21 1.0 19 20 21	C 3.368569 0.183239 -0.436352 C 2.366645 -0.418647 0.205667 C 1.039921 0.210590 0.535171 H 1.050659 1.262359 0.225173 C -0.144274 -0.531852 -0.115460 H -0.047499 -0.472374 -1.209335 C -1.539143 -0.025776 0.302152 H -1.592766 -0.068736 1.401515 H 4.302595 -0.329173 -0.651635 H 3.294141 1.216735 -0.769947 C -1.790658 1.428387 -0.125467 H -1.717610 1.531951 -1.216323 H -2.794151 1.755511 0.171688 H …	62.7544 76.1835 120.4156 178.0743 229.3069 255.1815 299.8733 346.7680 417.4423 434.0397 468.8347 649.2241 781.6431 828.9547 936.2827 937.7360 944.4537 952.2322 968.9029 976.4848 1037.5337 1047.1753 1075.2250 1152.3431 1200.3222 1207.7635 1261.4313 1294.9992 1330.6195 1340.8018 1366.2740 1388.6627 1408.8400 1430.0929 1449.4599 1475.2014 1506.3046 1519.1558 1522.6935 1528.3746 1535.5358 1541.5056 1…	0	0	0	1	0	2	0	0	0	1	0	0	0	2	0	1	0	0	0	0	0	0	0	0	0	0	0	0	0	0	0	0	0	0	0
184	[CH]=[CH][CH2][CH2][CH]([CH3])[CH3]	C7H13	20	-274.475	-274.294	-274.284	-274.428	-274.252	-274.242	42.0737	2	1 2 2.0 9 1.0 2 3 1.0 14 1.0 3 4 1.0 5 1.0 15 1.0 4 5 6 1.0 7 1.0 16 1.0 6 7 8 1.0 10 1.0 17 1.0 8 9 10 11 1.0 12 1.0 13 1.0 11 12 13 14 15 16 17 18 1.0 19 1.0 20 1.0 18 19 20	C 3.411074 0.223723 -0.485378 C 2.436868 -0.351205 0.181702 C 1.096438 0.270295 0.507340 H 1.091899 1.309242 0.162728 C -0.076087 -0.515278 -0.109698 H 0.011497 -0.487921 -1.205437 C -1.476342 -0.020745 0.303975 H -1.520037 -0.028366 1.404587 H 4.408702 -0.035928 -0.817482 C -1.757686 1.413663 -0.169365 H -1.696847 1.481786 -1.263679 H -2.763951 1.732786 0.127030 H -1.047307 2.134384 0.249604 H 2…	65.4038 77.0772 119.1176 183.3444 228.7348 254.9252 303.8038 347.7255 415.7813 437.2593 457.2220 652.3077 771.4776 813.9139 825.4536 833.1405 938.5883 950.4384 968.0160 975.3543 1036.9875 1053.2091 1151.1369 1160.9192 1204.0595 1237.9510 1275.8255 1312.7334 1332.1683 1366.2099 1388.4932 1408.9786 1430.2722 1449.6109 1505.4955 1518.9921 1521.8272 1528.1393 1535.4246 1541.4110 1695.3004 3001.9452 3…	0	0	0	1	0	2	0	0	1	0	0	0	0	2	0	1	0	0	0	0	0	0	0	0	0	0	0	0	0	0	0	0	0	0	0
185	[CH2]=[CH][CH2][CH2]C([CH3])[CH3]	C7H13	20	-274.501	-274.322	-274.311	-274.45	-274.275	-274.264	27.9789	2	1 2 2.0 8 1.0 9 1.0 2 3 1.0 14 1.0 3 4 1.0 5 1.0 15 1.0 4 5 6 1.0 7 1.0 16 1.0 6 7 10 1.0 17 1.0 8 9 10 11 1.0 12 1.0 13 1.0 11 12 13 14 15 16 17 18 1.0 19 1.0 20 1.0 18 19 20	C -3.370687 0.410254 -0.132132 C -2.340590 -0.388859 0.149428 C -0.964620 -0.276656 -0.446135 H -0.946993 0.515246 -1.205069 C 0.130364 0.009059 0.623236 H -0.117460 0.956003 1.119923 C 1.520986 0.059029 0.056963 H -4.341416 0.284083 0.340284 H -3.283469 1.221641 -0.852525 C 2.250400 1.361704 -0.053708 H 2.867917 1.573516 0.839733 H 2.940473 1.372438 -0.908736 H 1.561578 2.208080 -0.164433 H -2.4…	25.2292 67.2907 75.5499 99.8852 105.3898 149.8932 264.8268 314.2660 382.5306 420.4979 447.9750 638.9219 776.1861 792.4914 935.5032 938.1266 958.5194 975.7822 985.9253 1003.3336 1017.8890 1039.1011 1050.3437 1105.4325 1220.7765 1276.2562 1300.2255 1314.8253 1339.3621 1356.8453 1373.7368 1428.9931 1445.9008 1473.4340 1499.6765 1503.7390 1508.6242 1512.4047 1522.6846 1527.7263 1731.0138 2947.4078 29…	0	0	0	1	0	2	0	0	0	1	0	0	0	2	1	0	0	0	0	0	0	0	0	0	0	0	0	0	0	0	0	0	0	0	0
186	[CH2]=[CH][CH2][CH][CH]([CH3])[CH3]	C7H13	20	-274.496	-274.316	-274.305	-274.447	-274.271	-274.26	30.2029	2	1 2 2.0 9 1.0 10 1.0 2 3 1.0 15 1.0 3 4 1.0 5 1.0 16 1.0 4 5 6 1.0 7 1.0 6 7 8 1.0 11 1.0 17 1.0 8 9 10 11 12 1.0 13 1.0 14 1.0 12 13 14 15 16 17 18 1.0 19 1.0 20 1.0 18 19 20	C 3.440788 0.015631 -0.363797 C 2.339068 -0.383859 0.271969 C 1.071691 0.426092 0.405929 H 1.243660 1.423203 -0.040075 C -0.119336 -0.244579 -0.214432 H 0.014136 -0.694554 -1.198150 C -1.518606 -0.047375 0.290923 H -1.483401 -0.019729 1.392096 H 4.322738 -0.615527 -0.434599 H 3.504282 0.993770 -0.837226 C -2.105771 1.309626 -0.173212 H -2.178865 1.346678 -1.266956 H -3.111653 1.460673 0.238737 H …	30.0302 49.7294 82.2123 211.4118 229.3224 259.7809 273.1402 328.3256 378.1754 407.7777 473.8513 530.8813 655.1554 825.1515 890.9841 934.7190 937.0001 945.4567 957.0525 968.8681 1035.5102 1080.4244 1113.0070 1127.4760 1166.6461 1200.9074 1249.8973 1283.6246 1333.8872 1342.6049 1362.5890 1416.1340 1429.4417 1445.5487 1469.6044 1493.2271 1517.3776 1519.3979 1531.3375 1538.6519 1728.5925 2949.9791 29…	0	0	0	1	0	2	0	0	0	1	0	0	1	1	0	1	0	0	0	0	0	0	0	0	0	0	0	0	0	0	0	0	0	0	0
187	[CH2]=C[CH2][CH2][CH]([CH3])[CH3]	C7H13	20	-274.482	-274.302	-274.292	-274.434	-274.258	-274.247	38.4442	2	1 2 2.0 9 1.0 10 1.0 2 3 1.0 3 4 1.0 5 1.0 15 1.0 4 5 6 1.0 7 1.0 16 1.0 6 7 8 1.0 11 1.0 17 1.0 8 9 10 11 12 1.0 13 1.0 14 1.0 12 13 14 15 16 17 18 1.0 19 1.0 20 1.0 18 19 20	C 3.504467 -0.021692 -0.384518 C 2.382529 -0.321924 0.229222 C 1.062167 0.263581 0.533206 H 1.045580 1.306533 0.170724 C -0.108361 -0.534065 -0.081194 H -0.004891 -0.534517 -1.175421 C -1.508713 -0.018392 0.302987 H -1.563563 0.008785 1.402773 H 4.342821 -0.714868 -0.445225 H 3.657215 0.950900 -0.868800 C -1.780263 1.401101 -0.218787 H -1.709729 1.433755 -1.314140 H -2.787923 1.732786 0.058274 H …	62.9781 74.2378 113.5602 181.3924 227.5539 254.1890 294.9206 308.4474 385.6165 422.3492 438.5720 554.2732 769.2007 828.5874 880.5992 914.5834 938.6524 945.9525 968.2929 975.5703 1033.4319 1045.0718 1151.3233 1157.8062 1204.5233 1242.9645 1288.1220 1326.3465 1362.0894 1387.4946 1405.0381 1430.3171 1444.6747 1449.8251 1487.4758 1515.1006 1520.6040 1527.7474 1535.3432 1541.1568 1758.7891 2970.7752 3…	0	0	1	0	0	2	0	0	0	1	0	0	0	2	0	1	0	0	0	0	0	0	0	0	0	0	0	0	0	0	0	0	0	0	0
188	[CH2]=[CH][CH2][CH2][C@@H]([CH2])[CH3]	C7H13	20	-274.489	-274.31	-274.3	-274.443	-274.267	-274.257	32.4805	2	1 2 2.0 9 1.0 10 1.0 2 3 1.0 14 1.0 3 4 1.0 5 1.0 15 1.0 4 5 6 1.0 7 1.0 16 1.0 6 7 8 1.0 11 1.0 17 1.0 8 9 10 11 12 1.0 13 1.0 12 13 14 15 16 17 18 1.0 19 1.0 20 1.0 18 19 20	C 3.321073 0.214156 -0.425102 C 2.327489 -0.434647 0.183481 C 1.002230 0.165297 0.566578 H 0.994374 1.236172 0.328489 C -0.188850 -0.529477 -0.120268 H -0.077312 -0.444113 -1.210790 C -1.562773 0.036206 0.294348 H -1.638029 -0.025011 1.391718 H 4.255298 -0.277878 -0.682997 H 3.239258 1.267724 -0.686216 C -1.728920 1.467728 -0.111025 H -2.412328 2.123815 0.420130 H -1.344312 1.815768 -1.066897 H 2…	68.0342 75.4892 131.6751 136.2554 174.0367 247.6307 285.6390 339.4426 384.3790 428.2493 460.1203 548.2627 650.3661 784.4487 849.6479 925.7447 936.8184 943.8960 965.1052 973.6057 1025.8407 1037.1187 1059.6463 1093.7162 1159.4665 1196.7712 1254.0560 1290.8853 1325.7231 1334.3298 1348.5993 1384.8503 1400.0612 1426.2516 1475.2087 1485.5445 1510.0277 1522.1113 1525.2401 1530.6227 1732.6724 2998.5441 3…	0	0	0	1	1	1	0	0	0	1	0	0	0	2	0	1	0	0	0	0	0	0	0	0	0	0	0	0	0	0	0	0	0	0	0
189	CCCC=C(C)C	C7H14	21	-275.171	-274.977	-274.966	-275.118	-274.928	-274.918	-19.8178	1	1 2 2.0 14 1.0 18 1.0 2 3 1.0 9 1.0 3 4 1.0 5 1.0 10 1.0 4 5 6 1.0 7 1.0 11 1.0 6 7 8 1.0 12 1.0 13 1.0 8 9 10 11 12 13 14 15 1.0 16 1.0 17 1.0 15 16 17 18 19 1.0 20 1.0 21 1.0 19 20 21	C 1.576458 -0.018159 -0.035591 C 0.408029 -0.603039 -0.342282 C -0.931828 0.034964 -0.594445 H -1.281436 -0.250525 -1.599401 C -2.000717 -0.397098 0.429234 H -2.061460 -1.494315 0.445888 C -3.384473 0.188808 0.132390 H -3.744846 -0.125640 -0.855032 H 0.401926 -1.693332 -0.409139 H -0.860444 1.128794 -0.598864 H -1.674861 -0.095389 1.433484 H -3.361645 1.285666 0.141083 H -4.123130 -0.134101 0.874…	47.5676 86.1769 112.8909 152.4965 203.8311 244.2552 290.1255 318.7718 348.8048 420.9328 476.2292 547.7521 747.9104 794.6252 858.1922 898.8259 911.4570 974.0551 1016.5749 1031.7169 1053.9168 1109.6856 1117.1699 1123.4965 1150.4887 1238.8561 1283.0902 1315.5283 1340.1568 1392.8814 1411.7426 1439.6987 1439.8253 1450.5812 1502.3653 1507.9088 1519.6192 1520.7949 1524.2158 1528.7811 1529.5595 1539.9429…	0	0	0	1	0	3	0	0	0	0	0	1	0	2	0	0	0	0	0	0	0	0	0	0	0	0	0	0	0	0	0	0	0	0	0
190	[CH3][CH2][CH2][CH]C(=[CH2])[CH3] or [CH3][CH2][CH2]/[CH]=C(\[CH3])/[CH2]	C7H13	20	-274.523	-274.342	-274.332	-274.469	-274.293	-274.283	16.3474	2	1 2 1.5 14 1.0 18 1.5 2 3 1.0 9 1.0 3 4 1.0 5 1.0 10 1.0 4 5 6 1.0 7 1.0 11 1.0 6 7 8 1.0 12 1.0 13 1.0 8 9 10 11 12 13 14 15 1.0 16 1.0 17 1.0 15 16 17 18 19 1.0 20 1.0 19 20	C 1.687705 -0.070556 -0.010723 C 0.465707 -0.678126 -0.322512 C -0.844032 0.003823 -0.575054 H -1.197929 -0.245510 -1.589788 C -1.946733 -0.410055 0.425047 H -2.050312 -1.503735 0.412268 C -3.300055 0.239414 0.120588 H -3.656031 -0.035986 -0.879919 H 0.453528 -1.767378 -0.375719 H -0.730028 1.094161 -0.553062 H -1.625404 -0.145905 1.441088 H -3.232929 1.333787 0.157522 H -4.063010 -0.071518 0.843…	29.6788 85.6578 108.0455 142.6720 242.6304 259.9310 304.8822 346.4192 459.6395 486.1999 541.7187 568.1824 739.3337 750.6353 786.1068 829.1758 886.9615 899.8234 975.7609 1021.0448 1046.0736 1070.2081 1096.6729 1107.2285 1173.2442 1267.2081 1293.0766 1324.3830 1338.2258 1394.2979 1400.1998 1439.3452 1446.6388 1481.2827 1509.1557 1520.8481 1522.5878 1528.7771 1530.3537 1538.7112 1545.8378 2985.8454 …	1	1	0	0	0	2	1	0	0	0	0	0	0	2	0	0	0	0	0.0497871	0	0	0	0.00260216	0.00247875	0	0	0	0	0	0	0.0522658	0	0	0	0
191	[CH3][CH][CH2][CH]=C([CH3])[CH3]	C7H13	20	-274.504	-274.325	-274.314	-274.452	-274.277	-274.267	26.3529	2	1 2 2.0 13 1.0 17 1.0 2 3 1.0 9 1.0 3 4 1.0 5 1.0 10 1.0 4 5 6 1.0 7 1.0 6 7 8 1.0 11 1.0 12 1.0 8 9 10 11 12 13 14 1.0 15 1.0 16 1.0 14 15 16 17 18 1.0 19 1.0 20 1.0 18 19 20	C -1.550497 -0.043042 0.032535 C -0.343750 -0.549483 0.329177 C 0.960857 0.178624 0.541353 H 1.318271 -0.011599 1.567786 C 2.031325 -0.239685 -0.424591 H 1.730488 -0.474462 -1.443493 C 3.478329 -0.016197 -0.133847 H 3.727332 -0.277643 0.904246 H -0.264365 -1.633804 0.421480 H 0.809820 1.271404 0.494985 H 3.774224 1.041635 -0.263401 H 4.122795 -0.605687 -0.796112 C -1.856762 1.424373 -0.145021 H -…	44.8017 49.6875 100.7400 132.3996 153.0087 204.6354 276.4360 327.0979 347.1012 420.0948 425.0841 479.1834 534.3633 783.0602 859.6526 904.0160 919.1405 973.9355 1001.1877 1031.3245 1045.8774 1115.6975 1120.2798 1136.9451 1151.4375 1183.3594 1261.8156 1307.2945 1395.2687 1414.8164 1437.6482 1439.3778 1449.8897 1490.7020 1502.4842 1504.0971 1515.8192 1519.2396 1520.5238 1527.6021 1752.6076 2954.9270…	0	0	0	1	0	3	0	0	0	0	0	1	1	1	0	0	0	0	0	0	0	0	0	0	0	0	0	0	0	0	0	0	0	0	0
192	[CH3][CH2]/[CH]=[CH]/C([CH3])[CH3] or [CH3][CH2][CH][CH]=C([CH3])[CH3]	C7H13	20	-274.532	-274.352	-274.341	-274.476	-274.3	-274.289	12.0922	2	1 2 1.5 13 1.0 17 1.0 2 3 1.5 8 1.0 3 4 1.0 9 1.0 4 5 1.0 6 1.0 10 1.0 5 6 7 1.0 11 1.0 12 1.0 7 8 9 10 11 12 13 14 1.0 15 1.0 16 1.0 14 15 16 17 18 1.0 19 1.0 20 1.0 18 19 20	C 1.577053 -0.037341 -0.016232 C 0.266091 -0.490011 0.146719 C -0.887752 0.254048 0.341045 C -2.255323 -0.342551 0.498374 H -2.185642 -1.438149 0.488560 C -3.247219 0.120633 -0.586035 H -2.907889 -0.182615 -1.582650 H 0.134665 -1.574162 0.118391 H -0.832888 1.341474 0.374675 H -2.669860 -0.069624 1.482540 H -3.348137 1.212625 -0.587061 H -4.242593 -0.307222 -0.417831 C 1.968333 1.413709 -0.006010…	50.6323 67.3399 101.3131 147.2430 171.1437 231.7742 256.4616 326.3987 361.2067 417.9322 439.4323 528.3187 752.8023 784.6887 830.5683 917.0267 936.8248 978.4375 1012.6642 1022.7470 1064.9477 1079.4299 1083.2980 1141.4414 1234.5472 1263.4665 1299.3449 1340.9100 1378.1604 1432.8587 1435.5060 1439.0547 1451.9729 1497.3739 1508.7126 1510.6545 1513.5291 1526.2989 1532.2705 1537.9524 1555.0494 2995.0125…	1	0	0	0	0	3	0	1	0	0	1	0	0	1	0	0	0	0	0	0	0	0	0.00272557	0	0.0497871	0	0	0.00247875	0	0	0.0497871	0	0	0	0
193	[CH3][CH2][CH2]C=C([CH3])[CH3]	C7H13	20	-274.492	-274.311	-274.3	-274.44	-274.263	-274.252	35.291	2	1 2 2.0 13 1.0 17 1.0 2 3 1.0 3 4 1.0 5 1.0 9 1.0 4 5 6 1.0 7 1.0 10 1.0 6 7 8 1.0 11 1.0 12 1.0 8 9 10 11 12 13 14 1.0 15 1.0 16 1.0 14 15 16 17 18 1.0 19 1.0 20 1.0 18 19 20	C 1.611529 -0.043705 -0.042765 C 0.388140 -0.430685 -0.353647 C -0.968479 0.098857 -0.594185 H -1.292097 -0.157431 -1.614779 C -2.021489 -0.420175 0.407652 H -2.034207 -1.516851 0.372007 C -3.423332 0.127845 0.126995 H -3.767429 -0.155258 -0.875555 H -0.950990 1.204434 -0.556587 H -1.708234 -0.148939 1.423835 H -3.442294 1.223220 0.185915 H -4.151814 -0.256678 0.849622 C 1.983504 1.414740 0.18004…	46.2922 80.4459 103.0149 171.2982 197.6180 218.6445 243.8913 297.9497 328.1717 406.8243 488.9347 508.9174 745.4383 778.0128 884.2517 891.6400 963.3461 975.7174 991.5046 1051.0553 1104.3687 1112.0848 1119.9519 1168.1482 1200.8275 1267.4819 1312.1719 1333.6772 1395.8402 1421.3655 1436.4883 1440.4259 1486.8794 1503.6657 1513.5538 1519.3224 1521.8964 1522.3675 1528.8344 1537.8405 1786.3731 2947.6443 …	0	0	1	0	0	3	0	0	0	0	0	1	0	2	0	0	0	0	0	0	0	0	0	0	0	0	0	0	0	0	0	0	0	0	0
194	[CH2][CH2][CH2][CH]=C([CH3])[CH3]	C7H13	20	-274.498	-274.319	-274.308	-274.448	-274.273	-274.262	29.0367	2	1 2 2.0 13 1.0 17 1.0 2 3 1.0 9 1.0 3 4 1.0 5 1.0 10 1.0 4 5 6 1.0 7 1.0 11 1.0 6 7 8 1.0 12 1.0 8 9 10 11 12 13 14 1.0 15 1.0 16 1.0 14 15 16 17 18 1.0 19 1.0 20 1.0 18 19 20	C 1.511571 -0.018712 -0.035151 C 0.335209 -0.586607 -0.343606 C -0.995218 0.072139 -0.587922 H -1.348676 -0.190532 -1.597352 C -2.074447 -0.373859 0.427184 H -2.112159 -1.480545 0.424307 C -3.424873 0.190472 0.142779 H -3.765525 0.318652 -0.881197 H 0.314777 -1.676166 -0.419923 H -0.916821 1.163844 -0.567275 H -1.753674 -0.102776 1.442475 H -4.150582 0.341485 0.935644 C 1.742016 1.464984 0.120922…	47.8295 88.5622 114.2570 121.7457 152.3331 203.9203 290.4250 320.8420 349.0257 421.7097 458.4808 477.0952 550.2015 746.8017 795.5662 857.1370 897.1918 974.1562 987.2456 1031.3373 1046.3321 1082.3429 1111.7603 1119.5062 1139.8021 1175.6608 1257.6538 1302.6353 1322.8267 1383.2047 1408.1699 1439.7534 1450.6304 1485.8228 1498.8354 1502.6996 1511.4626 1520.7433 1524.0681 1529.9803 1754.6263 2933.5627 …	0	0	0	1	1	2	0	0	0	0	0	1	0	2	0	0	0	0	0	0	0	0	0	0	0	0	0	0	0	0	0	0	0	0	0
195	[CH3][CH2][CH2]/C(=C/[CH3])/[CH3]	C7H13	20	-274.491	-274.31	-274.299	-274.439	-274.262	-274.252	35.6394	2	1 2 2.0 13 1.0 2 3 1.0 17 1.0 3 4 1.0 5 1.0 9 1.0 4 5 6 1.0 7 1.0 10 1.0 6 7 8 1.0 11 1.0 12 1.0 8 9 10 11 12 13 14 1.0 15 1.0 16 1.0 14 15 16 17 18 1.0 19 1.0 20 1.0 18 19 20	C 1.605533 -0.690327 -0.120005 C 0.655488 0.220093 -0.225232 C -0.761120 -0.163183 -0.628628 H -0.760447 -1.194129 -1.001906 C -1.793421 -0.044279 0.509247 H -1.471184 -0.678866 1.345343 C -3.205178 -0.443582 0.067855 H -3.230464 -1.480743 -0.288560 H -1.082723 0.476484 -1.465876 H -1.811163 0.984758 0.891949 H -3.561039 0.195146 -0.750168 H -3.921208 -0.357288 0.893235 C 3.033822 -0.837626 0.209…	50.9273 81.6461 116.4651 140.5187 176.5079 210.4093 246.6035 275.0011 323.4044 362.2230 484.1581 561.1832 752.9825 761.0133 878.9407 897.6583 980.9772 1020.1464 1033.2104 1051.4898 1056.9459 1061.4985 1124.7357 1180.0954 1201.7544 1282.6676 1322.1815 1341.9093 1400.5334 1417.3005 1435.7837 1439.6734 1489.4822 1503.6344 1506.2013 1513.7748 1520.9434 1523.8975 1529.1196 1539.4474 1785.1484 2980.718…	0	0	1	0	0	3	0	0	0	0	0	1	0	2	0	0	0	0	0	0	0	0	0	0	0	0	0	0	0	0	0	0	0	0	0
196	[CH3][CH][CH2]/C(=[CH]/[CH3])/[CH3]	C7H13	20	-274.504	-274.325	-274.314	-274.453	-274.278	-274.267	26.0063	2	1 2 2.0 12 1.0 16 1.0 2 3 1.0 17 1.0 3 4 1.0 5 1.0 8 1.0 4 5 6 1.0 9 1.0 6 7 1.0 10 1.0 11 1.0 7 8 9 10 11 12 13 1.0 14 1.0 15 1.0 13 14 15 16 17 18 1.0 19 1.0 20 1.0 18 19 20	C -1.618963 -0.731206 0.087281 C -0.600015 0.129648 0.230060 C 0.783293 -0.374332 0.608945 H 0.709693 -1.440355 0.894561 C 1.811183 -0.198817 -0.471126 C 3.272387 -0.166990 -0.167689 H 3.678063 -1.173090 0.047990 H 1.130679 0.146456 1.517217 H 1.495310 -0.378339 -1.497525 H 3.487867 0.446030 0.718385 H 3.854221 0.231878 -1.006848 C -3.046167 -0.442702 -0.286026 H -3.239447 0.618341 -0.464865 H -3…	51.8570 65.0997 109.0504 122.3912 144.0420 180.9264 283.9299 297.9424 341.2283 382.8357 454.7648 497.4099 582.3498 784.3817 852.5402 886.5709 918.7204 982.5135 999.6151 1050.8421 1069.2626 1074.8330 1110.9183 1132.8134 1148.5025 1214.8633 1242.7214 1317.8177 1396.4178 1413.0772 1437.2390 1442.6743 1448.6229 1490.5503 1504.1345 1510.3227 1514.8257 1516.0061 1518.9551 1528.5476 1755.4851 2944.0263 …	0	0	0	1	0	3	0	0	0	0	0	1	1	1	0	0	0	0	0	0	0	0	0	0	0	0	0	0	0	0	0	0	0	0	0
197	[CH3][CH2]/[CH]=C(/[CH3])\[CH][CH3] or [CH3][CH2][CH]/C(=[CH]/[CH3])/[CH3]	C7H13	20	-274.526	-274.346	-274.336	-274.472	-274.296	-274.286	14.2896	2	1 2 1.5 12 1.0 16 1.0 2 3 1.5 17 1.0 3 4 1.0 8 1.0 4 5 1.0 6 1.0 9 1.0 5 6 7 1.0 10 1.0 11 1.0 7 8 9 10 11 12 13 1.0 14 1.0 15 1.0 13 14 15 16 17 18 1.0 19 1.0 20 1.0 18 19 20	C 1.222381 -0.821014 0.000001 C 0.587400 0.420495 0.000000 C -0.804719 0.535621 -0.000003 C -1.782520 -0.608308 -0.000006 H -1.607775 -1.255300 -0.874489 C -3.244352 -0.145316 0.000005 H -3.465090 0.463200 -0.885042 H -1.230384 1.538080 -0.000007 H -1.607765 -1.255311 0.874467 H -3.465081 0.463188 0.885064 H -3.931579 -0.998381 0.000003 C 2.699800 -1.065412 0.000002 H 3.283703 -0.140946 0.000004 …	21.9773 70.8052 131.4301 156.9918 167.8724 206.8488 275.8007 277.5057 353.1608 448.6206 488.0055 591.8315 644.6554 733.2635 802.4714 805.6582 929.9126 986.2006 1030.6960 1041.6214 1068.8777 1077.3700 1091.4641 1135.8783 1159.3244 1290.1274 1294.3235 1306.2389 1363.7353 1435.4694 1439.7640 1445.4383 1467.4663 1505.3839 1508.0636 1515.4317 1523.8237 1529.1276 1533.5896 1535.5159 1546.7530 2994.7582…	2	1	0	0	0	3	0	0	0	0	0	0	0	1	0	0	0	0.00247875	0.0995741	0	0	0	0.0573529	0	0	0	0	0	0	0	0.0499105	0	0	0	0
198	CCC/C(=C\C)/C	C7H14	21	-275.17	-274.975	-274.965	-275.117	-274.928	-274.917	-19.4731	1	1 2 2.0 17 1.0 18 1.0 2 3 1.0 13 1.0 3 4 1.0 5 1.0 9 1.0 4 5 6 1.0 7 1.0 10 1.0 6 7 8 1.0 11 1.0 12 1.0 8 9 10 11 12 13 14 1.0 15 1.0 16 1.0 14 15 16 17 18 19 1.0 20 1.0 21 1.0 19 20 21	C -1.857927 -0.244052 -0.140007 C -0.812820 0.554003 0.129286 C 0.536158 0.058315 0.612763 H 0.440795 -0.916397 1.105104 C 1.590573 -0.057558 -0.508008 H 1.229846 -0.769726 -1.261680 C 2.961933 -0.500378 0.011368 H 2.902518 -1.477892 0.505993 H 0.916966 0.749607 1.379584 H 1.689376 0.907307 -1.022878 H 3.359685 0.215032 0.741850 H 3.689931 -0.583674 -0.803747 C -0.922542 2.050628 -0.054308 H -0.7…	47.6645 82.3220 127.1692 174.3815 192.9125 241.8615 263.1924 275.0780 357.3140 409.9833 527.3030 556.5926 750.3399 795.0831 842.3102 887.7778 907.5616 976.6202 1040.0336 1048.6932 1071.8888 1078.2731 1085.4181 1125.9466 1156.8160 1237.7431 1287.8151 1321.3571 1342.7003 1391.1994 1407.9294 1439.3992 1441.8277 1445.5858 1507.2596 1511.3786 1513.5637 1521.9391 1527.4481 1528.9758 1532.0926 1543.1742…	0	0	0	1	0	3	0	0	0	0	0	1	0	2	0	0	0	0	0	0	0	0	0	0	0	0	0	0	0	0	0	0	0	0	0
199	[CH](=[CH2])C([CH2][CH2][CH3])[CH3] or [CH3][CH2][CH2]/C(=[CH]\[CH2])/[CH3]	C7H13	20	-274.526	-274.345	-274.335	-274.472	-274.296	-274.286	14.3892	2	1 2 1.5 17 1.0 18 1.5 2 3 1.0 13 1.0 3 4 1.0 5 1.0 9 1.0 4 5 6 1.0 7 1.0 10 1.0 6 7 8 1.0 11 1.0 12 1.0 8 9 10 11 12 13 14 1.0 15 1.0 16 1.0 14 15 16 17 18 19 1.0 20 1.0 19 20	C -1.838340 -0.512857 -0.134579 C -0.891437 0.478597 0.141792 C 0.499635 0.157008 0.627698 H 0.492619 -0.752923 1.241484 C 1.523325 -0.026665 -0.516703 H 1.187047 -0.846610 -1.163727 C 2.938550 -0.311294 -0.004928 H 2.964716 -1.224523 0.602449 H 0.852513 0.966549 1.283468 H 1.533364 0.875037 -1.143673 H 3.308268 0.511232 0.619851 H 3.643157 -0.442710 -0.834109 C -1.216032 1.929134 -0.079931 H -1.…	53.9483 88.5167 143.8168 167.2213 223.4649 242.2761 271.0583 343.9249 391.3659 457.9752 539.4879 595.8767 752.3190 763.4880 791.3815 884.9312 894.6639 968.8924 998.6149 1040.3808 1047.2143 1051.7668 1100.4590 1113.8577 1232.4855 1254.0840 1287.6370 1316.9313 1340.4192 1385.6871 1396.6043 1438.9754 1440.4743 1484.9181 1503.6267 1516.8647 1524.3846 1528.4167 1531.9949 1539.5832 1550.0638 3006.6014 …	0	0	0	0	0	2	1	1	0	0	1	0	0	2	0	0	0	0	0	0	0	0	0	0	0	0	0	0	0	0	0	0	0	0	0
200	[CH2][CH2][CH2]/C(=[CH]\[CH3])/[CH3]	C7H13	20	-274.497	-274.318	-274.307	-274.447	-274.272	-274.262	29.4345	2	1 2 2.0 16 1.0 17 1.0 2 3 1.0 12 1.0 3 4 1.0 5 1.0 8 1.0 4 5 6 1.0 7 1.0 9 1.0 6 7 10 1.0 11 1.0 8 9 10 11 12 13 1.0 14 1.0 15 1.0 13 14 15 16 17 18 1.0 19 1.0 20 1.0 18 19 20	C -1.806755 -0.211790 -0.139983 C -0.740068 0.558422 0.126146 C 0.589246 0.026713 0.623637 H 0.467174 -0.940988 1.120411 C 1.649086 -0.127012 -0.495798 H 1.278661 -0.834250 -1.250192 C 2.981626 -0.563290 0.011351 H 0.989389 0.713256 1.384267 H 1.741555 0.838828 -1.027209 H 3.361565 -0.189762 0.958469 H 3.661844 -1.135125 -0.611860 C -0.803681 2.055478 -0.074588 H -0.637296 2.587889 0.872709 H -0.…	49.4937 84.4216 114.0498 127.3084 175.1922 195.7590 262.5735 274.5251 356.8154 408.7825 462.8537 527.7730 557.3085 739.4662 804.3073 843.0636 887.8276 971.8237 987.5054 1055.7919 1073.9911 1078.2480 1080.5726 1095.0380 1138.1331 1189.9716 1253.0867 1311.5059 1325.0241 1383.1731 1403.3734 1441.6370 1445.4802 1485.7791 1499.0520 1507.5765 1513.1743 1515.3220 1527.3229 1537.6441 1751.8989 2944.8685 …	0	0	0	1	1	2	0	0	0	0	0	1	0	2	0	0	0	0	0	0	0	0	0	0	0	0	0	0	0	0	0	0	0	0	0
201	C/C=C/[C@H](C)CC	C7H14	21	-275.168	-274.974	-274.964	-275.117	-274.927	-274.917	-19.3359	1	1 2 2.0 17 1.0 18 1.0 2 3 1.0 12 1.0 3 4 1.0 5 1.0 13 1.0 4 5 6 1.0 7 1.0 9 1.0 6 7 8 1.0 10 1.0 11 1.0 8 9 10 11 12 13 14 1.0 15 1.0 16 1.0 14 15 16 17 18 19 1.0 20 1.0 21 1.0 19 20 21	C 1.714539 -0.057195 -0.408729 C 0.626119 0.280341 0.288334 C -0.745690 0.540341 -0.284349 H -0.696384 0.390346 -1.373343 C -1.796864 -0.442295 0.282327 H -1.825786 -0.337700 1.377063 C -1.550087 -1.907456 -0.088538 H -0.576091 -2.251784 0.275250 H -2.788947 -0.136413 -0.077997 H -1.563086 -2.046109 -1.176963 H -2.321583 -2.558399 0.338509 H 0.710588 0.395837 1.373038 C -1.171396 1.997725 -0.0206…	73.8088 98.4499 156.3039 193.2430 212.3324 227.8413 239.8118 264.4214 363.2571 446.2997 469.3072 483.8945 784.1737 812.7130 845.9150 908.9421 968.9723 997.7046 1016.7477 1031.8745 1039.3657 1078.8600 1097.1628 1120.4820 1188.9232 1205.4076 1280.7463 1325.5499 1336.9252 1343.8676 1392.3668 1399.8581 1433.7231 1440.3629 1442.7156 1510.1482 1514.9605 1522.9618 1526.1020 1527.9803 1531.0130 1537.6462…	0	0	0	2	0	3	0	0	0	0	0	0	0	1	0	1	0	0	0	0	0	0	0	0	0	0	0	0	0	0	0	0	0	0	0
202	[CH3]/[CH]=C/[C@H]([CH3])[CH2][CH3]	C7H13	20	-274.488	-274.308	-274.297	-274.438	-274.261	-274.251	36.1428	2	1 2 2.0 16 1.0 17 1.0 2 3 1.0 3 4 1.0 5 1.0 12 1.0 4 5 6 1.0 7 1.0 9 1.0 6 7 8 1.0 10 1.0 11 1.0 8 9 10 11 12 13 1.0 14 1.0 15 1.0 13 14 15 16 17 18 1.0 19 1.0 20 1.0 18 19 20	C -1.782508 -0.070193 0.434964 C -0.628378 0.263661 -0.102708 C 0.770110 0.556670 0.286024 H 0.834516 0.440252 1.386121 C 1.772120 -0.439806 -0.345819 H 1.703900 -0.358220 -1.439033 C 1.558062 -1.893965 0.080885 H 0.556901 -2.242618 -0.193757 H 2.786854 -0.120207 -0.072562 H 1.662651 -2.006744 1.167396 H 2.291148 -2.555541 -0.394255 C 1.147166 2.012391 -0.056917 H 1.106329 2.178485 -1.139522 H 0.…	78.0679 89.7733 126.4962 151.0319 193.5551 226.9522 241.5985 256.5183 374.4862 440.0825 456.0656 502.1163 754.9417 769.5758 826.4630 878.6317 969.5673 998.1958 1031.1053 1042.2861 1069.2322 1083.4460 1116.7824 1158.0613 1191.6114 1265.6316 1303.0372 1319.0397 1373.0748 1385.6232 1431.1452 1434.1762 1440.4637 1513.8547 1514.3615 1519.0706 1524.0796 1527.7568 1530.8828 1537.4635 1777.9220 2922.1134…	0	0	1	1	0	3	0	0	0	0	0	0	0	1	0	1	0	0	0	0	0	0	0	0	0	0	0	0	0	0	0	0	0	0	0
203	[CH3]/[CH]=[CH]/[C@H]([CH3])[CH2][CH2]	C7H13	20	-274.496	-274.317	-274.306	-274.447	-274.272	-274.262	29.3078	2	1 2 2.0 16 1.0 17 1.0 2 3 1.0 11 1.0 3 4 1.0 5 1.0 12 1.0 4 5 6 1.0 7 1.0 9 1.0 6 7 8 1.0 10 1.0 8 9 10 11 12 13 1.0 14 1.0 15 1.0 13 14 15 16 17 18 1.0 19 1.0 20 1.0 18 19 20	C -1.690304 0.030121 -0.409519 C -0.585857 -0.257345 0.285307 C 0.787845 -0.479620 -0.296302 H 0.727308 -0.345545 -1.385281 C 1.808133 0.553444 0.250215 H 1.860847 0.427078 1.350184 C 1.499393 1.969391 -0.097542 H 0.471575 2.299497 -0.208163 H 2.812971 0.289387 -0.111796 H 2.280160 2.723552 -0.099574 H -0.657286 -0.355068 1.372519 C 1.273414 -1.913196 -0.010409 H 1.348271 -2.094838 1.069552 H 0.5…	74.8991 117.2617 142.7132 170.2833 197.2869 213.0684 234.5254 258.0243 365.9557 434.2579 461.3543 470.9191 492.3784 786.5490 811.0499 887.4759 907.7604 978.8797 1012.1500 1020.2723 1065.4778 1072.4445 1079.1175 1118.5315 1129.1505 1195.1823 1227.1594 1310.7798 1330.7996 1343.3010 1376.5626 1400.8934 1433.3099 1442.7609 1481.1319 1494.5994 1510.0955 1522.7050 1525.8005 1529.4508 1753.6804 2921.921…	0	0	0	2	1	2	0	0	0	0	0	0	0	1	0	1	0	0	0	0	0	0	0	0	0	0	0	0	0	0	0	0	0	0	0
204	[CH2]=[CH][CH][C@H]([CH3])[CH2][CH3] or [CH2]/[CH]=[CH]/[C@H]([CH3])[CH2][CH3]	C7H13	20	-274.522	-274.341	-274.331	-274.469	-274.293	-274.283	16.3361	2	1 2 1.5 17 1.0 18 1.5 2 3 1.0 12 1.0 3 4 1.0 5 1.0 13 1.0 4 5 6 1.0 7 1.0 9 1.0 6 7 8 1.0 10 1.0 11 1.0 8 9 10 11 12 13 14 1.0 15 1.0 16 1.0 14 15 16 17 18 19 1.0 20 1.0 19 20	C 1.822597 -0.090203 -0.383033 C 0.681211 0.262632 0.324558 C -0.666248 0.538670 -0.281039 H -0.594144 0.383203 -1.368075 C -1.749821 -0.424894 0.262828 H -1.811234 -0.307073 1.354575 C -1.509570 -1.896833 -0.084716 H -0.555930 -2.252141 0.320766 H -2.724951 -0.109074 -0.133240 H -1.482544 -2.046560 -1.171365 H -2.306312 -2.532437 0.318222 H 0.756220 0.366059 1.409380 C -1.081675 2.005240 -0.0359…	57.7461 101.9677 154.0262 196.1300 227.9135 234.1311 265.0846 352.3751 437.0756 467.6316 481.8787 549.2268 756.1806 783.1023 801.8852 840.7142 909.4448 978.4215 1001.6508 1011.7635 1032.5106 1035.9311 1105.3146 1170.4824 1197.2850 1223.1880 1272.1688 1295.3576 1324.7694 1337.7145 1387.5221 1408.0801 1431.6774 1440.5261 1511.4100 1517.1275 1526.1197 1528.2354 1532.1558 1537.1466 1543.8308 3014.182…	1	0	0	0	0	2	1	1	0	0	0	0	0	1	0	1	0	0	0	0	0	0	0.00260216	0.00247875	0.0497871	0	0	0	0	0	0.00247875	0	0.0497871	0	0
205	[CH3]/[CH]=[CH]/[C@H]([CH2])[CH2][CH3]	C7H13	20	-274.495	-274.316	-274.306	-274.446	-274.271	-274.261	30.0342	2	1 2 2.0 16 1.0 17 1.0 2 3 1.0 12 1.0 3 4 1.0 5 1.0 13 1.0 4 5 6 1.0 7 1.0 9 1.0 6 7 8 1.0 10 1.0 11 1.0 8 9 10 11 12 13 14 1.0 15 1.0 14 15 16 17 18 1.0 19 1.0 20 1.0 18 19 20	C 1.697898 -0.086826 -0.401062 C 0.611304 0.255255 0.298568 C -0.743409 0.607110 -0.292292 H -0.679431 0.447732 -1.380331 C -1.868738 -0.294252 0.265335 H -1.900377 -0.181720 1.359056 C -1.718334 -1.773894 -0.098082 H -0.772998 -2.182397 0.274954 H -2.829418 0.083763 -0.108638 H -1.732691 -1.916092 -1.185957 H -2.535722 -2.368548 0.325377 H 0.677343 0.325451 1.386819 C -1.024656 2.058848 -0.03475…	75.3246 99.7653 130.9138 157.4785 201.2963 215.2796 236.2103 249.3585 342.7700 439.2813 451.4103 483.7231 549.9993 783.0477 811.7418 836.3576 929.1009 976.1501 1006.0440 1012.9916 1049.7377 1076.8550 1083.5998 1108.8729 1165.5377 1186.3742 1265.5777 1310.8636 1332.3296 1340.8107 1372.7507 1393.9094 1439.8168 1441.9237 1481.2168 1509.8293 1518.1186 1522.3408 1527.0035 1537.3061 1737.3398 3000.2282…	0	0	0	2	1	2	0	0	0	0	0	0	0	1	0	1	0	0	0	0	0	0	0	0	0	0	0	0	0	0	0	0	0	0	0
206	[CH3]/[CH]=[CH]/[C@H]([CH3])[CH][CH3]	C7H13	20	-274.502	-274.323	-274.312	-274.452	-274.277	-274.266	26.8535	2	1 2 2.0 16 1.0 17 1.0 2 3 1.0 11 1.0 3 4 1.0 5 1.0 12 1.0 4 5 6 1.0 8 1.0 6 7 1.0 9 1.0 10 1.0 7 8 9 10 11 12 13 1.0 14 1.0 15 1.0 13 14 15 16 17 18 1.0 19 1.0 20 1.0 18 19 20	C -1.687876 -0.114684 0.397334 C -0.635381 0.345945 -0.285786 C 0.762936 0.539818 0.275048 H 0.714688 0.340164 1.356777 C 1.704722 -0.455804 -0.349114 C 1.740820 -1.882259 0.089173 H 0.848418 -2.441782 -0.243235 H 2.149219 -0.194960 -1.309147 H 1.763486 -1.967457 1.184938 H 2.616071 -2.407164 -0.309570 H -0.751490 0.587305 -1.345158 C 1.246396 1.986977 0.064005 H 1.292079 2.230023 -1.005285 H 0.5…	57.4458 68.8018 111.4762 161.4722 193.3613 211.0857 234.1502 254.1326 354.7460 376.6010 453.3341 485.7083 522.2041 808.6995 853.2267 899.2865 968.5097 998.9216 1009.2568 1015.1417 1061.7237 1077.0017 1090.6727 1135.9231 1174.0247 1193.9037 1269.3512 1318.8634 1339.4671 1372.4034 1411.0349 1430.1409 1437.0895 1442.0852 1504.2109 1510.0031 1515.9248 1522.5971 1524.3345 1527.4146 1739.9692 2972.6709…	0	0	0	2	0	3	0	0	0	0	0	0	1	0	0	1	0	0	0	0	0	0	0	0	0	0	0	0	0	0	0	0	0	0	0
207	[CH3]/C=[CH]/[C@H]([CH3])[CH2][CH3]	C7H13	20	-274.488	-274.308	-274.297	-274.438	-274.262	-274.252	35.787	2	1 2 2.0 17 1.0 2 3 1.0 12 1.0 3 4 1.0 5 1.0 13 1.0 4 5 6 1.0 7 1.0 9 1.0 6 7 8 1.0 10 1.0 11 1.0 8 9 10 11 12 13 14 1.0 15 1.0 16 1.0 14 15 16 17 18 1.0 19 1.0 20 1.0 18 19 20	C 1.740188 -0.021388 -0.277074 C 0.628946 0.303937 0.346427 C -0.728219 0.532740 -0.293094 H -0.621684 0.370564 -1.374257 C -1.778812 -0.466204 0.241617 H -1.852018 -0.353618 1.333602 C -1.487948 -1.928511 -0.107603 H -0.520877 -2.248422 0.294743 H -2.762083 -0.183447 -0.159635 H -1.456992 -2.075072 -1.194459 H -2.260872 -2.592448 0.296308 H 0.654483 0.440842 1.440116 C -1.186288 1.984576 -0.0634…	64.0059 100.5236 139.8306 162.5757 227.1275 229.8733 231.9774 256.7653 347.6334 405.8288 431.5001 473.8352 776.6833 801.4607 840.5477 891.4732 973.4194 1001.6173 1031.2221 1031.3534 1057.7148 1062.5403 1118.5222 1170.9886 1187.1248 1264.0070 1315.5479 1336.1098 1381.6700 1393.5493 1426.6242 1433.4026 1439.9476 1488.1068 1506.5956 1514.3267 1525.5520 1527.3673 1530.1436 1537.2050 1780.2814 2981.25…	0	0	1	1	0	3	0	0	0	0	0	0	0	1	0	1	0	0	0	0	0	0	0	0	0	0	0	0	0	0	0	0	0	0	0
208	C/C=C/CC(C)C	C7H14	21	-275.168	-274.974	-274.964	-275.117	-274.928	-274.917	-19.6461	1	1 2 2.0 12 1.0 13 1.0 2 3 1.0 11 1.0 3 4 1.0 5 1.0 17 1.0 4 5 6 1.0 7 1.0 18 1.0 6 7 8 1.0 9 1.0 10 1.0 8 9 10 11 12 13 14 1.0 15 1.0 16 1.0 14 15 16 17 18 19 1.0 20 1.0 21 1.0 19 20 21	C -2.039427 -0.122907 0.413116 C -0.989722 -0.497194 -0.323923 C 0.375179 -0.843669 0.206131 H 0.602931 -1.891004 -0.046937 C 1.515693 0.041706 -0.352199 H 1.457006 0.001164 -1.451133 C 2.884707 -0.512593 0.066231 H 3.021229 -1.545520 -0.276232 H 2.992202 -0.506923 1.158945 H 3.701095 0.089887 -0.349450 H -1.109522 -0.565915 -1.408409 H -1.920253 -0.053750 1.496415 C -3.402519 0.211413 -0.123179 …	71.7306 76.4038 141.3065 211.7767 225.6594 251.1422 274.7640 312.3010 329.7845 422.6244 427.0852 539.0412 761.0509 843.2713 893.7286 933.5195 940.5196 962.8445 976.5019 1014.9015 1071.1948 1079.1732 1095.0569 1143.2947 1192.5590 1202.9238 1261.9696 1314.3488 1345.3002 1360.5261 1384.6060 1396.7530 1428.7149 1442.6809 1447.4492 1504.9667 1510.1296 1518.8413 1523.4353 1524.7373 1533.5960 1539.7630 …	0	0	0	2	0	3	0	0	0	0	0	0	0	1	0	1	0	0	0	0	0	0	0	0	0	0	0	0	0	0	0	0	0	0	0
209	[CH2]=[CH][CH][CH2][CH]([CH3])[CH3] or [CH2]/[CH]=[CH]/[CH2][CH]([CH3])[CH3]	C7H13	20	-274.522	-274.342	-274.332	-274.47	-274.293	-274.283	15.8416	2	1 2 1.5 12 1.0 13 1.5 2 3 1.0 11 1.0 3 4 1.0 5 1.0 16 1.0 4 5 6 1.0 7 1.0 17 1.0 6 7 8 1.0 9 1.0 10 1.0 8 9 10 11 12 13 14 1.0 15 1.0 14 15 16 17 18 1.0 19 1.0 20 1.0 18 19 20	C -2.149598 -0.100201 0.398955 C -1.052138 -0.486764 -0.360141 C 0.295659 -0.836650 0.191302 H 0.526697 -1.886969 -0.052503 C 1.455887 0.037818 -0.351920 H 1.420793 -0.016330 -1.450932 C 2.810941 -0.519337 0.105380 H 2.948978 -1.557497 -0.220065 H 2.893827 -0.499145 1.200007 H 3.639785 0.072929 -0.299991 H -1.171074 -0.546612 -1.443454 H -2.010568 -0.043817 1.480260 C -3.401996 0.214542 -0.103044…	60.4203 75.5113 141.5668 225.6622 252.4167 259.8338 311.9211 327.2478 417.2960 423.7395 535.3607 549.8686 745.1355 777.9483 830.2896 885.2346 931.4620 941.8671 969.1398 976.6326 1004.5385 1069.4943 1133.8844 1172.2244 1199.8154 1223.3858 1253.8484 1296.3799 1308.4723 1366.6778 1383.1290 1397.5925 1428.7841 1447.3864 1501.3268 1518.3558 1520.2758 1524.7624 1533.8960 1539.0265 1542.7574 2988.4651 3…	1	0	0	0	0	2	1	1	0	0	0	0	0	1	0	1	0	0	0	0	0	0	0.00024682	0.00247875	0.0497871	0	0	0	0	0	0.0497871	0	0.00247875	0	0
210	[CH3][CH]/[CH]=[CH]/[CH]([CH3])[CH3] or [CH3]/[CH]=[CH]/[CH][CH]([CH3])[CH3]	C7H13	20	-274.528	-274.348	-274.338	-274.473	-274.297	-274.287	13.8109	2	1 2 1.5 12 1.0 13 1.0 2 3 1.5 11 1.0 3 4 1.0 5 1.0 4 5 6 1.0 7 1.0 17 1.0 6 7 8 1.0 9 1.0 10 1.0 8 9 10 11 12 13 14 1.0 15 1.0 16 1.0 14 15 16 17 18 1.0 19 1.0 20 1.0 18 19 20	C 2.240846 -0.000009 -0.442868 C 1.016376 -0.000002 0.212312 C -0.229128 -0.000018 -0.399079 H -0.274537 -0.000038 -1.490145 C -1.546335 -0.000001 0.325647 H -1.342837 0.000006 1.406253 C -2.362448 -1.267407 -0.003754 H -1.813290 -2.174602 0.270362 H -2.583177 -1.320916 -1.077463 H -3.318650 -1.268911 0.533971 H 1.036483 0.000017 1.305122 H 2.244732 -0.000027 -1.533077 C 3.570258 0.000004 0.24339…	46.3545 118.2021 142.4000 173.7392 213.3917 230.9500 255.7436 305.7593 364.7333 407.7021 460.7295 528.7276 730.9472 784.3799 849.5120 937.1544 938.2083 958.4136 965.7080 988.0805 1037.8323 1104.7130 1110.8202 1179.7571 1204.8061 1222.9151 1282.5547 1304.6293 1352.1567 1364.4206 1420.8482 1438.6178 1440.3749 1473.1463 1503.8972 1517.5489 1518.9710 1522.1736 1532.5134 1540.1809 1553.7270 3010.3816 …	2	0	0	0	0	3	0	1	0	0	0	0	0	0	0	1	0	0.00247875	0	0	0	0	0.0548803	0	0.0995741	0	0	0	0	0	0	0	0.0499105	0	0
211	[CH3]/[CH]=[CH]/[CH2][C@H]([CH3])[CH2]	C7H13	20	-274.496	-274.317	-274.306	-274.447	-274.272	-274.262	29.3542	2	1 2 2.0 12 1.0 13 1.0 2 3 1.0 11 1.0 3 4 1.0 5 1.0 17 1.0 4 5 6 1.0 7 1.0 18 1.0 6 7 8 1.0 9 1.0 10 1.0 8 9 10 11 12 13 14 1.0 15 1.0 16 1.0 14 15 16 17 18 19 1.0 20 1.0 19 20	C -2.012455 -0.128765 0.412604 C -0.956738 -0.468312 -0.333160 C 0.406921 -0.821500 0.193005 H 0.652090 -1.853994 -0.099467 C 1.541081 0.099385 -0.331895 H 1.498368 0.051226 -1.438832 C 2.922967 -0.437562 0.084080 H 3.083255 -1.453461 -0.296039 H 3.018267 -0.463986 1.176216 H 3.726165 0.198515 -0.305713 H -1.070054 -0.497284 -1.419954 H -1.898329 -0.099449 1.498205 C -3.375718 0.214278 -0.117514 …	77.3965 81.0085 137.4565 163.4366 212.8996 240.9459 275.5857 308.0122 332.1096 397.5434 428.6895 508.6764 544.1017 764.8960 858.2026 893.4093 921.9210 956.2945 976.0277 1014.4872 1042.6925 1078.9584 1092.0855 1123.9232 1149.1690 1192.1794 1227.8032 1301.2625 1340.5668 1347.5013 1360.1572 1383.4113 1431.3325 1442.7944 1482.2171 1507.5832 1510.0585 1523.3456 1525.9082 1531.2390 1755.7751 2906.2125 …	0	0	0	2	1	2	0	0	0	0	0	0	0	1	0	1	0	0	0	0	0	0	0	0	0	0	0	0	0	0	0	0	0	0	0
212	[CH3]/[CH]=[CH]/[CH2]C([CH3])[CH3]	C7H13	20	-274.508	-274.328	-274.317	-274.455	-274.28	-274.269	24.691	2	1 2 2.0 11 1.0 12 1.0 2 3 1.0 10 1.0 3 4 1.0 5 1.0 16 1.0 4 5 6 1.0 17 1.0 6 7 1.0 8 1.0 9 1.0 7 8 9 10 11 12 13 1.0 14 1.0 15 1.0 13 14 15 16 17 18 1.0 19 1.0 20 1.0 18 19 20	C -2.043722 -0.119843 0.380246 C -0.939809 -0.493217 -0.272897 C 0.384362 -0.830457 0.371975 H 0.635089 -1.879157 0.152222 C 1.529460 0.045964 -0.075739 C 2.892857 -0.553188 -0.232534 H 2.848871 -1.573626 -0.633274 H 3.434063 -0.616992 0.730985 H 3.525304 0.048147 -0.898792 H -0.966236 -0.563449 -1.362235 H -2.007339 -0.046268 1.469331 C -3.363154 0.206419 -0.260033 H -4.158179 -0.459505 0.102740…	35.7120 74.7710 112.1163 127.8588 145.8905 212.1376 261.8429 267.5558 329.8107 337.4121 436.8808 523.5764 748.1894 812.2173 900.0904 942.5712 954.6995 990.9346 1001.7579 1014.4968 1056.5729 1078.9514 1082.8667 1132.3040 1208.1504 1263.5000 1300.1880 1340.4811 1353.8763 1374.5863 1426.6742 1442.2869 1444.4658 1490.9996 1500.9660 1508.7853 1510.2243 1514.6138 1522.8802 1524.1172 1752.2870 2939.0978…	0	0	0	2	0	3	0	0	0	0	0	0	0	1	1	0	0	0	0	0	0	0	0	0	0	0	0	0	0	0	0	0	0	0	0
213	[CH3]/C=[CH]/[CH2][CH]([CH3])[CH3]	C7H13	20	-274.488	-274.308	-274.298	-274.438	-274.262	-274.252	35.6028	2	1 2 2.0 12 1.0 2 3 1.0 11 1.0 3 4 1.0 5 1.0 16 1.0 4 5 6 1.0 7 1.0 17 1.0 6 7 8 1.0 9 1.0 10 1.0 8 9 10 11 12 13 1.0 14 1.0 15 1.0 13 14 15 16 17 18 1.0 19 1.0 20 1.0 18 19 20	C 2.065703 -0.136802 -0.295013 C 1.002532 -0.539829 0.367118 C -0.354908 -0.848443 -0.223390 H -0.599381 -1.901228 -0.015166 C -1.495755 0.035199 0.333639 H -1.467513 -0.041928 1.431937 C -2.860194 -0.485314 -0.139963 H -3.020828 -1.526459 0.165137 H -2.936915 -0.443101 -1.234394 H -3.679203 0.115867 0.272496 H 1.081070 -0.669854 1.458267 C 3.473754 0.226214 -0.058799 H 4.158360 -0.431880 -0.6094…	64.9351 72.9104 132.2189 201.7663 228.2203 234.3043 252.0885 281.8873 325.2086 409.0342 421.6485 498.8018 746.5285 838.6326 880.2056 925.2641 941.0004 964.3450 976.3213 1042.6035 1062.5222 1078.1728 1139.2521 1160.6172 1203.1521 1253.9795 1304.0947 1339.4361 1383.1000 1391.0364 1426.6419 1428.9354 1447.2700 1487.9224 1504.7450 1506.8849 1518.7398 1524.5331 1533.4396 1539.5492 1782.5635 2981.4397 …	0	0	1	1	0	3	0	0	0	0	0	0	0	1	0	1	0	0	0	0	0	0	0	0	0	0	0	0	0	0	0	0	0	0	0
214	[CH3]/[CH]=C/[CH2][CH]([CH3])[CH3]	C7H13	20	-274.489	-274.308	-274.298	-274.439	-274.262	-274.252	35.6018	2	1 2 2.0 11 1.0 12 1.0 2 3 1.0 3 4 1.0 5 1.0 16 1.0 4 5 6 1.0 7 1.0 17 1.0 6 7 8 1.0 9 1.0 10 1.0 8 9 10 11 12 13 1.0 14 1.0 15 1.0 13 14 15 16 17 18 1.0 19 1.0 20 1.0 18 19 20	C -2.127340 -0.132949 0.416355 C -0.993004 -0.488933 -0.148645 C 0.386476 -0.868734 0.212457 H 0.580929 -1.898996 -0.121137 C 1.484367 0.056923 -0.370851 H 1.346328 0.076343 -1.461382 C 2.876690 -0.515783 -0.074342 H 2.991036 -1.527127 -0.482956 H 3.057426 -0.570028 1.007305 H 3.662175 0.112680 -0.509877 H -2.164455 -0.057559 1.513639 C -3.415541 0.184942 -0.302470 H -4.220883 -0.490685 0.015207 …	67.6390 79.0212 107.7445 194.0557 220.4021 234.8769 259.2769 304.2388 332.6936 416.5700 433.8157 509.3248 739.5862 825.6859 875.0567 891.0036 942.2902 957.7750 977.1227 1063.7155 1069.9777 1082.1764 1140.1556 1153.7510 1201.3981 1248.9454 1305.7994 1329.3859 1381.2540 1386.8886 1429.3078 1432.6551 1447.2879 1481.4136 1514.1344 1519.1979 1519.4011 1522.9177 1533.2366 1539.5685 1781.4938 2938.2390 …	0	0	1	1	0	3	0	0	0	0	0	0	0	1	0	1	0	0	0	0	0	0	0	0	0	0	0	0	0	0	0	0	0	0	0
215	[CH3][CH2]/[CH]=C/[CH]([CH3])[CH3]	C7H13	20	-274.488	-274.307	-274.297	-274.437	-274.26	-274.25	36.7487	2	1 2 2.0 9 1.0 2 3 1.0 7 1.0 3 4 1.0 5 1.0 8 1.0 4 5 6 1.0 11 1.0 12 1.0 6 7 8 9 10 1.0 13 1.0 17 1.0 10 11 12 13 14 1.0 15 1.0 16 1.0 14 15 16 17 18 1.0 19 1.0 20 1.0 18 19 20	C -0.214018 -0.174204 -0.088667 C 0.974603 -0.369796 0.440747 C 2.267293 -0.565322 -0.320363 H 2.053594 -0.594922 -1.394728 C 3.301322 0.531354 -0.019600 H 2.924990 1.515667 -0.319497 H 1.068780 -0.380601 1.538079 H 2.696429 -1.543100 -0.055931 C -1.619610 0.051689 0.320150 H -1.639758 0.054363 1.427013 H 3.531598 0.575645 1.051920 H 4.239304 0.345979 -0.555772 C -2.537763 -1.088613 -0.163913 H -…	45.6713 89.0782 123.3225 137.2172 226.3692 241.0990 266.6533 301.5183 362.9099 437.0869 463.7282 493.1508 761.8282 804.5226 832.4142 890.7201 938.9758 953.6975 972.2642 1040.8739 1092.2046 1108.8860 1125.7063 1161.3952 1204.5048 1262.4806 1305.3922 1329.7737 1348.8506 1379.5746 1421.8823 1435.3314 1442.8584 1511.2536 1517.0005 1520.1067 1526.9697 1529.2072 1535.9121 1539.2794 1774.5900 2932.9690 …	0	0	1	1	0	3	0	0	0	0	0	0	0	1	0	1	0	0	0	0	0	0	0	0	0	0	0	0	0	0	0	0	0	0	0
216	CC/C=C/C(C)C	C7H14	21	-275.168	-274.974	-274.964	-275.116	-274.926	-274.916	-18.7915	1	1 2 2.0 3 1.0 4 1.0 2 14 1.0 15 1.0 3 4 5 1.0 6 1.0 10 1.0 5 6 7 1.0 8 1.0 9 1.0 7 8 9 10 11 1.0 12 1.0 13 1.0 11 12 13 14 15 16 1.0 17 1.0 18 1.0 16 17 18 19 1.0 20 1.0 21 1.0 19 20 21	C 0.211137 -0.184238 0.299804 C -0.935934 -0.338832 -0.366704 H 0.198231 -0.238474 1.392279 C 1.564500 0.062165 -0.320791 H 1.437987 0.094087 -1.412383 C 2.539338 -1.082728 0.014207 H 3.521072 -0.909512 -0.443234 H 2.687670 -1.166019 1.098655 H 2.158401 -2.044700 -0.345592 C 2.138429 1.417572 0.133877 H 1.470684 2.241681 -0.139889 H 2.270185 1.441405 1.223400 H 3.117943 1.602994 -0.323520 H -0.92…	49.7368 107.6032 126.1464 171.3580 230.2301 245.6315 275.1903 303.2936 352.6834 450.8501 461.8526 505.5411 786.4718 846.1858 853.9897 913.5560 939.2123 958.1462 970.8017 1016.3202 1040.7128 1099.4271 1120.7909 1127.8575 1199.6294 1212.1685 1282.2822 1314.7596 1343.6957 1355.7136 1362.4406 1407.7125 1423.0371 1435.8648 1443.6407 1511.0805 1518.4287 1520.1126 1527.7451 1531.3131 1536.8361 1539.6381…	0	0	0	2	0	3	0	0	0	0	0	0	0	1	0	1	0	0	0	0	0	0	0	0	0	0	0	0	0	0	0	0	0	0	0
217	[CH3][CH2]/[CH]=[CH]/[C@H]([CH3])[CH2]	C7H13	20	-274.495	-274.316	-274.305	-274.446	-274.27	-274.26	30.6294	2	1 2 2.0 3 1.0 4 1.0 2 13 1.0 14 1.0 3 4 5 1.0 6 1.0 10 1.0 5 6 7 1.0 8 1.0 9 1.0 7 8 9 10 11 1.0 12 1.0 11 12 13 14 15 1.0 16 1.0 17 1.0 15 16 17 18 1.0 19 1.0 20 1.0 18 19 20	C -0.263887 -0.194111 -0.293734 C 0.883043 -0.324896 0.380101 H -0.260605 -0.297797 -1.381094 C -1.616096 0.120010 0.324371 H -1.479269 0.143371 1.415992 C -2.650071 -0.968782 -0.016767 H -3.620425 -0.740504 0.438587 H -2.797523 -1.038999 -1.102014 H -2.319692 -1.949924 0.340831 C -2.067035 1.477107 -0.131223 H -1.598421 2.370985 0.269468 H -2.678784 1.586378 -1.023188 H 0.870769 -0.209934 1.4669…	51.8596 105.4046 127.7006 142.0271 179.2740 239.0315 272.4579 295.3336 338.8867 428.9882 457.5198 499.2842 552.4339 788.6303 844.6374 859.4957 913.2777 925.0382 959.4158 1013.2990 1034.1426 1088.9539 1102.4855 1117.2474 1179.6407 1192.2227 1267.4909 1301.9770 1341.5929 1348.1035 1355.0420 1393.1939 1429.7687 1435.5924 1482.4096 1511.0576 1525.0838 1527.6535 1528.2338 1536.7512 1734.0592 3012.5653…	0	0	0	2	1	2	0	0	0	0	0	0	0	1	0	1	0	0	0	0	0	0	0	0	0	0	0	0	0	0	0	0	0	0	0
218	[CH3][CH2]/C=[CH]/[CH]([CH3])[CH3]	C7H13	20	-274.488	-274.308	-274.297	-274.437	-274.261	-274.25	36.4501	2	1 2 2.0 3 1.0 4 1.0 2 14 1.0 3 4 5 1.0 6 1.0 10 1.0 5 6 7 1.0 8 1.0 9 1.0 7 8 9 10 11 1.0 12 1.0 13 1.0 11 12 13 14 15 1.0 16 1.0 17 1.0 15 16 17 18 1.0 19 1.0 20 1.0 18 19 20	C 0.229718 -0.210346 0.384224 C -0.950880 -0.344383 -0.179772 H 0.311074 -0.307355 1.479138 C 1.537725 0.070765 -0.331883 H 1.321648 0.143479 -1.405419 C 2.533927 -1.082444 -0.115330 H 3.479716 -0.886506 -0.635149 H 2.760234 -1.210145 0.951273 H 2.128326 -2.029636 -0.486926 C 2.134192 1.411106 0.133917 H 1.443610 2.239020 -0.059599 H 2.343459 1.393951 1.211456 H 3.077226 1.622182 -0.384981 C -2.3…	43.3435 86.5236 129.8648 151.0843 231.9826 243.0383 270.5424 308.3307 357.8704 407.3975 441.1242 496.6655 777.8455 812.4191 843.4349 877.7620 940.2827 953.7726 971.0137 1042.4486 1086.7249 1099.3850 1129.1301 1169.7352 1197.7225 1260.2941 1300.4590 1351.5973 1360.4475 1380.2861 1422.9274 1434.9913 1442.9020 1488.5717 1518.3967 1519.3879 1525.6624 1530.5558 1534.8494 1538.8916 1775.7820 2957.5074 …	0	0	1	1	0	3	0	0	0	0	0	0	0	1	0	1	0	0	0	0	0	0	0	0	0	0	0	0	0	0	0	0	0	0	0
219	[CH2][CH2]/[CH]=[CH]/[CH]([CH3])[CH3]	C7H13	20	-274.495	-274.316	-274.306	-274.446	-274.271	-274.26	30.3361	2	1 2 2.0 3 1.0 4 1.0 2 14 1.0 15 1.0 3 4 5 1.0 6 1.0 10 1.0 5 6 7 1.0 8 1.0 9 1.0 7 8 9 10 11 1.0 12 1.0 13 1.0 11 12 13 14 15 16 1.0 17 1.0 18 1.0 16 17 18 19 1.0 20 1.0 19 20	C 0.143774 -0.169584 0.290544 C -1.000475 -0.308613 -0.383859 H 0.122814 -0.222178 1.382955 C 1.504109 0.056694 -0.321928 H 1.385042 0.088339 -1.414267 C 2.460187 -1.101342 0.021812 H 3.447095 -0.942697 -0.429608 H 2.600367 -1.184545 1.107337 H 2.068216 -2.058536 -0.338844 C 2.093701 1.404839 0.134376 H 1.439473 2.237726 -0.145307 H 2.218777 1.428786 1.224659 H 3.078570 1.575482 -0.317123 H -0.98…	50.7030 110.8210 117.7607 134.5855 192.6556 230.1167 264.9406 304.3733 353.9945 445.2315 457.6796 460.8237 517.7093 791.1165 846.6514 852.9199 939.4845 960.9254 971.0565 1005.1178 1016.0965 1076.7324 1103.2501 1127.1808 1159.6459 1203.1281 1232.8717 1305.1689 1340.5930 1351.6189 1357.4170 1399.1661 1423.1702 1443.7035 1482.9864 1488.4107 1518.4590 1520.0471 1531.3155 1539.5415 1747.4610 2951.5091…	0	0	0	2	1	2	0	0	0	0	0	0	0	1	0	1	0	0	0	0	0	0	0	0	0	0	0	0	0	0	0	0	0	0	0
220	[CH3][CH2]/C=C(\[CH3])/[CH2][CH3]	C7H13	20	-274.49	-274.309	-274.298	-274.438	-274.261	-274.251	36.1732	2	1 2 2.0 3 1.0 17 1.0 2 9 1.0 3 4 1.0 5 1.0 16 1.0 4 5 6 1.0 7 1.0 8 1.0 6 7 8 9 10 1.0 11 1.0 12 1.0 10 11 12 13 1.0 14 1.0 15 1.0 13 14 15 16 17 18 1.0 19 1.0 20 1.0 18 19 20	C 0.489823 0.199456 -0.152607 C -0.664711 -0.346612 0.182669 C 1.672436 -0.659585 -0.578896 H 1.328410 -1.689061 -0.726439 C 2.838664 -0.653214 0.424299 H 3.654740 -1.295720 0.073734 H 3.249698 0.352543 0.566952 H 2.511227 -1.023622 1.402274 C -2.029400 0.001775 0.626557 H -2.220422 -0.442077 1.614658 H -2.105733 1.095016 0.771260 C -3.126085 -0.457319 -0.352626 H -3.095188 -1.543250 -0.490412 H …	45.8017 58.4881 116.5076 165.3444 174.7546 222.6189 257.9481 268.5243 347.1941 447.5105 496.6945 543.1062 729.1741 794.0274 802.7796 891.5457 964.2739 1014.2795 1021.0625 1033.3391 1092.2355 1099.2778 1103.2939 1172.7012 1202.1471 1289.0069 1310.4726 1352.9905 1368.7162 1425.6447 1434.4020 1435.3089 1488.9187 1504.9269 1514.7645 1520.3294 1525.4485 1531.3217 1534.6853 1537.0547 1779.5655 2957.387…	0	0	1	0	0	3	0	0	0	0	0	1	0	2	0	0	0	0	0	0	0	0	0	0	0	0	0	0	0	0	0	0	0	0	0
221	[CH3][CH2]/[CH]=C(\[CH3])/[CH2][CH2]	C7H13	20	-274.497	-274.318	-274.307	-274.447	-274.272	-274.262	29.5016	2	1 2 2.0 3 1.0 17 1.0 2 8 1.0 9 1.0 3 4 1.0 5 1.0 16 1.0 4 5 6 1.0 7 1.0 6 7 8 9 10 1.0 11 1.0 12 1.0 10 11 12 13 1.0 14 1.0 15 1.0 13 14 15 16 17 18 1.0 19 1.0 20 1.0 18 19 20	C 0.533348 0.140738 -0.136422 C -0.593204 -0.511013 0.190102 C 1.778888 -0.635576 -0.540999 H 1.505403 -1.698217 -0.670822 C 2.907955 -0.514203 0.435218 H 3.942363 -0.536641 0.106629 H 2.712663 -0.564093 1.502533 H -0.570030 -1.602130 0.136443 C -1.924483 0.052522 0.611443 H -2.174760 -0.334969 1.610766 H -1.882097 1.142319 0.710406 C -3.056963 -0.329194 -0.358521 H -3.138938 -1.417991 -0.461630 …	49.2772 78.6986 120.8164 135.4159 158.1984 217.3549 251.3306 313.4412 359.1059 459.2529 476.2720 485.8643 568.2081 743.0790 818.2654 845.2303 888.8958 914.8173 1008.6650 1030.9942 1052.9761 1070.4087 1099.4910 1111.7640 1145.3849 1213.6523 1242.9027 1305.1399 1351.9671 1360.6996 1413.5010 1435.5975 1445.2219 1481.9099 1490.4228 1509.6652 1512.6658 1525.4771 1527.9548 1537.7852 1749.0588 2957.9524…	0	0	0	1	1	2	0	0	0	0	0	1	0	2	0	0	0	0	0	0	0	0	0	0	0	0	0	0	0	0	0	0	0	0	0
222	C([CH]=[CH][CH3])([CH2][CH3])[CH3] or [CH3][CH]/[CH]=C(\[CH3])/[CH2][CH3]	C7H13	20	-274.531	-274.351	-274.34	-274.476	-274.3	-274.289	12.1038	2	1 2 1.5 3 1.0 17 1.0 2 9 1.0 10 1.5 3 4 1.0 5 1.0 16 1.0 4 5 6 1.0 7 1.0 8 1.0 6 7 8 9 10 11 1.0 12 1.0 11 12 13 1.0 14 1.0 15 1.0 13 14 15 16 17 18 1.0 19 1.0 20 1.0 18 19 20	C -0.518979 0.234070 0.272739 C 0.739295 -0.370770 0.203798 C -1.744377 -0.587076 0.583360 H -1.445465 -1.591329 0.908881 C -2.723684 -0.714666 -0.601948 H -3.601682 -1.307256 -0.319398 H -3.078024 0.267125 -0.936023 H -2.241602 -1.204664 -1.455370 H 0.771668 -1.439223 0.429027 C 1.947108 0.224716 -0.120788 H 1.972727 1.284346 -0.368902 C 3.255717 -0.502239 -0.156654 H 3.136610 -1.560490 0.101385…	52.2419 63.8502 127.8752 158.2899 174.8416 199.4205 246.9363 296.6928 354.7681 430.9984 464.9912 557.1235 738.2981 795.0690 799.4066 929.9261 953.9583 974.3517 1019.0626 1030.2636 1040.6731 1082.6377 1098.2427 1121.5998 1232.2350 1266.9300 1291.7810 1361.3808 1365.9199 1431.1928 1434.4109 1438.7314 1445.0251 1504.7339 1506.7731 1510.0280 1520.3155 1525.5850 1529.5480 1538.3542 1553.9058 2998.9702…	1	0	0	0	0	3	0	1	0	0	1	0	0	1	0	0	0	0	0	0	0	0	0.0499166	0	0.0497871	0	0	0.00247875	0	0	0.00012341	0	0	0	0
223	CC/C=C(/C)\CC	C7H14	21	-275.169	-274.974	-274.964	-275.117	-274.927	-274.916	-18.8658	1	1 2 2.0 3 1.0 10 1.0 2 14 1.0 15 1.0 3 4 1.0 5 1.0 9 1.0 4 5 6 1.0 7 1.0 8 1.0 6 7 8 9 10 11 1.0 12 1.0 13 1.0 11 12 13 14 15 16 1.0 17 1.0 18 1.0 16 17 18 19 1.0 20 1.0 21 1.0 19 20 21	C -0.561580 0.551980 0.072616 C 0.695449 0.588428 -0.397402 C -1.218028 -0.681236 0.663676 H -0.462791 -1.393914 1.011136 C -2.166004 -1.398346 -0.316307 H -2.644688 -2.259911 0.163582 H -2.960676 -0.732090 -0.670489 H -1.618797 -1.758583 -1.194496 H -1.790491 -0.384863 1.554489 C -1.435376 1.784938 0.024464 H -2.361999 1.603904 -0.537270 H -1.740799 2.090993 1.035250 H -0.920979 2.630011 -0.4440…	47.6097 52.3563 141.9507 199.1367 207.8256 229.4305 245.3838 316.7753 369.1539 450.5336 512.7446 566.8213 748.3086 792.1640 817.8560 873.8558 917.6928 972.8221 1020.1509 1042.5519 1063.5460 1096.2794 1100.4009 1118.1633 1159.3823 1238.4582 1302.3886 1316.2196 1348.4066 1370.4535 1412.6674 1433.8119 1437.5747 1444.8258 1505.5699 1510.0479 1522.3688 1527.2949 1528.2239 1530.2317 1536.0417 1544.3216…	0	0	0	1	0	3	0	0	0	0	0	1	0	2	0	0	0	0	0	0	0	0	0	0	0	0	0	0	0	0	0	0	0	0	0
224	[CH2][CH2]/[CH]=C(/[CH3])\[CH2][CH3]	C7H13	20	-274.496	-274.317	-274.306	-274.446	-274.271	-274.26	30.2344	2	1 2 2.0 3 1.0 10 1.0 2 14 1.0 15 1.0 3 4 1.0 5 1.0 9 1.0 4 5 6 1.0 7 1.0 8 1.0 6 7 8 9 10 11 1.0 12 1.0 13 1.0 11 12 13 14 15 16 1.0 17 1.0 18 1.0 16 17 18 19 1.0 20 1.0 19 20	C -0.506044 0.553906 0.069776 C 0.754747 0.596126 -0.389454 C -1.159172 -0.675103 0.672668 H -0.402791 -1.375920 1.041443 C -2.089619 -1.415650 -0.306715 H -2.567624 -2.272534 0.182021 H -2.884739 -0.761514 -0.681750 H -1.529198 -1.786624 -1.172021 H -1.744625 -0.368678 1.551499 C -1.388267 1.779506 -0.004673 H -2.308329 1.582437 -0.571628 H -1.704701 2.097823 0.998838 H -0.876040 2.621220 -0.481…	46.7467 51.8586 129.6447 144.4851 200.7030 215.7386 245.2771 298.3586 370.7870 430.5186 476.0921 511.9972 566.4263 737.8647 795.4018 837.9321 873.2123 977.6151 995.6104 1024.0436 1062.8393 1065.9514 1097.1603 1110.7091 1146.0659 1184.2657 1258.3413 1313.6048 1343.1945 1363.9492 1407.1952 1435.1109 1444.6258 1482.3901 1487.7843 1508.6607 1520.3051 1526.8850 1530.0966 1541.2640 1742.6624 2976.9098 …	0	0	0	1	1	2	0	0	0	0	0	1	0	2	0	0	0	0	0	0	0	0	0	0	0	0	0	0	0	0	0	0	0	0	0
225	CC[C@@H](C)C(=C)C	C7H14	21	-275.166	-274.971	-274.961	-275.117	-274.927	-274.917	-19.5718	1	1 2 2.0 8 1.0 9 1.0 2 3 1.0 14 1.0 3 4 1.0 5 1.0 18 1.0 4 5 6 1.0 7 1.0 10 1.0 6 7 8 9 10 11 1.0 12 1.0 13 1.0 11 12 13 14 15 1.0 16 1.0 17 1.0 15 16 17 18 19 1.0 20 1.0 21 1.0 19 20 21	C 1.543109 -1.063614 -1.055896 C 0.951422 -0.316790 -0.116946 C -0.230028 0.582714 -0.459577 H -0.434028 0.446713 -1.531295 C -1.520849 0.199708 0.301799 H -1.366602 0.342146 1.380486 H -2.306022 0.913166 0.016090 H 2.393747 -1.702559 -0.829345 H 1.201030 -1.062307 -2.088286 C -2.009795 -1.226509 0.032550 H -2.936357 -1.435209 0.579487 H -2.211229 -1.378611 -1.035091 H -1.264451 -1.971097 0.33254…	48.8483 105.1873 174.1148 196.8653 220.1918 252.4432 275.6468 292.6360 403.3330 444.5260 518.1215 563.6581 718.5928 742.6267 816.2978 872.5325 924.9284 956.5970 987.0679 1022.9349 1026.7477 1040.4821 1078.9595 1121.5276 1135.8375 1191.7648 1290.7240 1316.2449 1340.5799 1375.7078 1393.9580 1433.6029 1441.1409 1442.1784 1478.6132 1506.0702 1522.3996 1524.6595 1527.9549 1530.5473 1534.5692 1538.0753…	0	0	0	0	0	3	0	0	0	1	0	1	0	1	0	1	0	0	0	0	0	0	0	0	0	0	0	0	0	0	0	0	0	0	0
226	[CH3][CH2][C@@H]([CH3])C(=[CH2])[CH2]	C7H13	20	-274.517	-274.337	-274.327	-274.467	-274.291	-274.281	17.4455	2	1 2 1.5 8 1.0 9 1.0 2 3 1.0 14 1.5 3 4 1.0 5 1.0 17 1.0 4 5 6 1.0 7 1.0 10 1.0 6 7 8 9 10 11 1.0 12 1.0 13 1.0 11 12 13 14 15 1.0 16 1.0 15 16 17 18 1.0 19 1.0 20 1.0 18 19 20	C 1.649654 -1.074326 -0.937279 C 0.990331 -0.295345 0.002956 C -0.198409 0.564425 -0.437890 H -0.346197 0.384942 -1.512205 C -1.512076 0.172637 0.274005 H -1.398536 0.328756 1.355708 H -2.297189 0.869011 -0.051863 H 2.503561 -1.687391 -0.661689 H 1.339413 -1.097663 -1.977372 C -1.967114 -1.265340 0.007738 H -2.911682 -1.480013 0.520426 H -2.123875 -1.438461 -1.064345 H -1.223120 -1.990000 0.35523…	52.3473 107.0832 191.8413 227.6438 243.4237 275.5573 298.1992 399.9742 441.7198 522.5024 536.8032 560.6098 624.8560 732.4625 757.2755 801.2041 821.5133 885.8194 982.7441 994.0208 1024.3773 1038.2371 1052.6436 1115.0683 1130.2689 1192.0651 1281.7308 1328.7106 1342.0579 1372.7747 1398.0441 1427.4938 1438.2441 1441.9632 1509.8571 1516.8408 1528.2008 1529.8358 1531.5014 1537.4998 1554.9887 3023.3581 …	0	1	0	0	0	2	2	0	0	0	0	0	0	1	0	1	0	0	0	0	0	0	0	0	0	0	0	0	0	0	0	0	0	0	0
227	[CH2][CH2][C@@H]([CH3])C(=[CH2])[CH3]	C7H13	20	-274.494	-274.315	-274.304	-274.448	-274.273	-274.262	28.9841	2	1 2 2.0 8 1.0 9 1.0 2 3 1.0 13 1.0 3 4 1.0 5 1.0 17 1.0 4 5 6 1.0 7 1.0 10 1.0 6 7 8 9 10 11 1.0 12 1.0 11 12 13 14 1.0 15 1.0 16 1.0 14 15 16 17 18 1.0 19 1.0 20 1.0 18 19 20	C 1.666615 -0.846437 -1.050908 C 0.947631 -0.229595 -0.105956 C -0.318681 0.537391 -0.464635 H -0.476275 0.410531 -1.543976 C -1.577419 -0.019604 0.247286 H -1.475249 0.152429 1.335856 H -2.442812 0.595764 -0.045281 H 2.580396 -1.387136 -0.814862 H 1.370834 -0.829852 -2.097355 C -1.861279 -1.456644 -0.029909 H -2.829162 -1.884943 0.211639 H -1.077571 -2.125226 -0.370737 C 1.370690 -0.266436 1.344…	45.5547 119.3452 141.6845 177.8654 207.1355 243.6310 274.7451 281.3195 408.4623 438.0209 457.0030 514.7040 564.8324 712.7954 744.0061 853.9488 891.4908 926.3134 959.5706 1010.2847 1019.0391 1049.2983 1081.9219 1093.2701 1124.7228 1149.0662 1218.0226 1309.8082 1337.1072 1368.3080 1386.7672 1433.4855 1440.1843 1478.4345 1482.0024 1493.2984 1514.1570 1525.6555 1530.2921 1533.3987 1727.1107 2940.4266…	0	0	0	0	1	2	0	0	0	1	0	1	0	1	0	1	0	0	0	0	0	0	0	0	0	0	0	0	0	0	0	0	0	0	0
228	[CH3][CH2][C@@H]([CH3])C(=[CH])[CH3]	C7H13	20	-274.479	-274.298	-274.288	-274.433	-274.256	-274.246	39.4769	2	1 2 2.0 8 1.0 2 3 1.0 13 1.0 3 4 1.0 5 1.0 17 1.0 4 5 6 1.0 7 1.0 9 1.0 6 7 8 9 10 1.0 11 1.0 12 1.0 10 11 12 13 14 1.0 15 1.0 16 1.0 14 15 16 17 18 1.0 19 1.0 20 1.0 18 19 20	C 1.374347 -1.239762 -1.150740 C 0.937807 -0.466104 -0.177099 C -0.139291 0.597702 -0.451424 H -0.394634 0.528853 -1.517904 C -1.437746 0.342913 0.347264 H -1.227011 0.416691 1.423021 H -2.135686 1.161445 0.122445 H 1.168100 -1.356852 -2.208777 C -2.112064 -0.997357 0.040988 H -3.036308 -1.113638 0.618271 H -2.371346 -1.073809 -1.022299 H -1.455455 -1.841191 0.278592 C 1.481600 -0.591057 1.233115…	46.9349 105.8859 171.7872 194.7793 219.1701 251.0653 274.6086 285.3686 383.6595 427.0369 508.3399 549.6481 697.2573 712.9901 814.1765 841.6339 892.9882 977.0703 1008.6093 1023.5395 1033.2930 1059.0676 1114.7008 1122.9145 1189.4685 1220.4681 1300.8842 1336.3623 1376.1645 1391.2288 1430.1148 1436.7991 1442.2939 1508.0710 1512.4347 1524.5226 1527.4542 1528.4501 1533.5336 1536.7676 1696.4995 3026.315…	0	0	0	0	0	3	0	0	1	0	0	1	0	1	0	1	0	0	0	0	0	0	0	0	0	0	0	0	0	0	0	0	0	0	0
229	[CH3][CH][C@@H]([CH3])C(=[CH2])[CH3]	C7H13	20	-274.5	-274.321	-274.311	-274.453	-274.278	-274.267	25.9783	2	1 2 2.0 7 1.0 8 1.0 2 3 1.0 13 1.0 3 4 1.0 5 1.0 17 1.0 4 5 6 1.0 9 1.0 6 7 8 9 10 1.0 11 1.0 12 1.0 10 11 12 13 14 1.0 15 1.0 16 1.0 14 15 16 17 18 1.0 19 1.0 20 1.0 18 19 20	C 1.419340 -1.250314 -0.991498 C 0.941334 -0.365402 -0.109930 C -0.231639 0.553061 -0.471023 H -0.458508 0.352124 -1.531991 C -1.458173 0.222891 0.339785 H -1.862119 0.978246 1.010662 H 2.241777 -1.917970 -0.744591 H 1.010474 -1.336708 -1.995724 C -2.211094 -1.049913 0.140197 H -2.804345 -1.317524 1.022339 H -2.917035 -0.984640 -0.707940 H -1.533644 -1.884271 -0.084095 C 1.513063 -0.244549 1.2824…	39.6277 71.4422 89.3865 175.2314 182.0368 237.6160 258.6960 273.7589 324.8118 409.9683 447.5117 534.8693 565.8889 741.8689 752.1119 871.6983 921.5834 952.6591 996.4358 1006.1019 1025.1453 1046.9994 1081.0703 1102.2127 1146.4365 1190.2407 1282.2938 1309.8075 1333.7947 1401.2207 1431.3103 1435.1585 1437.2017 1473.9378 1507.0423 1507.8963 1516.1904 1523.7123 1528.7736 1535.2454 1724.7868 2962.2757 2…	0	0	0	0	0	3	0	0	0	1	0	1	1	0	0	1	0	0	0	0	0	0	0	0	0	0	0	0	0	0	0	0	0	0	0
230	[CH3][CH2][C@@H]([CH2])C(=[CH2])[CH3]	C7H13	20	-274.494	-274.315	-274.304	-274.448	-274.273	-274.263	28.8912	2	1 2 2.0 8 1.0 9 1.0 2 3 1.0 14 1.0 3 4 1.0 5 1.0 18 1.0 4 5 6 1.0 7 1.0 10 1.0 6 7 8 9 10 11 1.0 12 1.0 13 1.0 11 12 13 14 15 1.0 16 1.0 17 1.0 15 16 17 18 19 1.0 20 1.0 19 20	C 1.574526 -1.022213 -1.027841 C 0.960270 -0.277932 -0.102507 C -0.224131 0.617502 -0.466865 H -0.422798 0.446097 -1.542029 C -1.525035 0.244287 0.287136 H -1.377397 0.393433 1.364773 H -2.302646 0.959734 -0.012718 H 2.428442 -1.649898 -0.783409 H 1.248841 -1.030557 -2.065463 C -2.012952 -1.181364 0.018044 H -2.943358 -1.386859 0.559342 H -2.207048 -1.336575 -1.050524 H -1.270712 -1.925830 0.3261…	62.0299 104.4489 110.0331 176.5687 197.0879 228.9779 272.4830 288.8028 404.4309 442.3733 452.3264 539.0192 582.5206 729.3703 748.5868 832.1355 861.3719 925.7186 959.2474 1003.4330 1027.4993 1051.9175 1069.5744 1083.7977 1139.8246 1167.2542 1269.1813 1286.2511 1312.8369 1353.4011 1386.3432 1436.3630 1442.2224 1473.6151 1480.6631 1505.4067 1521.2587 1526.9557 1527.3446 1537.5871 1729.0613 2928.9197…	0	0	0	0	1	2	0	0	0	1	0	1	0	1	0	1	0	0	0	0	0	0	0	0	0	0	0	0	0	0	0	0	0	0	0
231	C=C(C)CC(C)C	C7H14	21	-275.168	-274.973	-274.963	-275.119	-274.929	-274.919	-20.394	1	1 2 2.0 7 1.0 8 1.0 2 3 1.0 13 1.0 3 4 1.0 5 1.0 17 1.0 4 5 6 1.0 9 1.0 18 1.0 6 7 8 9 10 1.0 11 1.0 12 1.0 10 11 12 13 14 1.0 15 1.0 16 1.0 14 15 16 17 18 19 1.0 20 1.0 21 1.0 19 20 21	C 2.122845 1.003587 -0.583709 C 1.375087 -0.047167 -0.228735 C -0.013464 -0.263217 -0.794107 H -0.048973 -1.253037 -1.275589 C -1.169646 -0.190952 0.234485 H -0.975134 -0.935686 1.020173 H 3.124853 1.154162 -0.188509 H 1.761836 1.750900 -1.286319 C -2.499711 -0.562715 -0.436428 H -3.325496 -0.545647 0.284672 H -2.745385 0.145338 -1.238769 H -2.460053 -1.565773 -0.878156 C 1.885570 -1.088768 0.738…	47.3941 96.1650 172.6957 191.9869 227.4413 250.8084 317.0300 371.3911 392.0995 425.5320 460.7535 540.4936 714.2498 826.0566 841.4938 910.0666 924.4450 942.5095 955.6236 977.0356 1005.9092 1032.4123 1077.4872 1144.2856 1150.9067 1203.6238 1266.1369 1313.4880 1334.1985 1385.1600 1390.9399 1429.7433 1440.7004 1448.7259 1472.5945 1504.3190 1514.1421 1518.3641 1523.1385 1528.6892 1533.9904 1539.1026 1…	0	0	0	0	0	3	0	0	0	1	0	1	0	1	0	1	0	0	0	0	0	0	0	0	0	0	0	0	0	0	0	0	0	0	0
232	[CH2]=C([CH3])[CH2][C@H]([CH3])[CH2]	C7H13	20	-274.495	-274.316	-274.305	-274.448	-274.273	-274.263	28.5997	2	1 2 2.0 7 1.0 8 1.0 2 3 1.0 13 1.0 3 4 1.0 5 1.0 17 1.0 4 5 6 1.0 9 1.0 18 1.0 6 7 8 9 10 1.0 11 1.0 12 1.0 10 11 12 13 14 1.0 15 1.0 16 1.0 14 15 16 17 18 19 1.0 20 1.0 19 20	C 2.120152 1.024588 -0.514333 C 1.347456 -0.029532 -0.228104 C -0.044875 -0.171003 -0.805512 H -0.107122 -1.120185 -1.359438 C -1.195620 -0.156839 0.236817 H -1.022713 -1.004970 0.927380 H 3.125469 1.124531 -0.111635 H 1.777512 1.823877 -1.167133 C -2.549154 -0.423710 -0.449713 H -3.364967 -0.436316 0.282293 H -2.773258 0.356614 -1.186688 H -2.545769 -1.390475 -0.967210 C 1.830417 -1.143457 0.670…	49.5679 101.3787 157.9675 175.4369 192.4415 243.4614 312.6024 378.2153 385.3099 410.8228 450.7269 516.4258 539.8401 715.8345 825.5836 860.1991 905.4421 924.5233 945.3741 974.0938 1006.0767 1024.4167 1077.6493 1083.9132 1150.7333 1166.4305 1231.0828 1309.4535 1317.1484 1360.0564 1371.5482 1430.9075 1440.1993 1472.0875 1483.2173 1505.3590 1515.7450 1525.6906 1526.5084 1531.2075 1731.6864 2922.4573 …	0	0	0	0	1	2	0	0	0	1	0	1	0	1	0	1	0	0	0	0	0	0	0	0	0	0	0	0	0	0	0	0	0	0	0
233	[CH2]=C([CH3])[CH2]C([CH3])[CH3]	C7H13	20	-274.508	-274.328	-274.318	-274.458	-274.282	-274.272	23.1658	2	1 2 2.0 6 1.0 7 1.0 2 3 1.0 12 1.0 3 4 1.0 5 1.0 16 1.0 4 5 8 1.0 17 1.0 6 7 8 9 1.0 10 1.0 11 1.0 9 10 11 12 13 1.0 14 1.0 15 1.0 13 14 15 16 17 18 1.0 19 1.0 20 1.0 18 19 20	C 2.255678 0.858441 -0.457041 C 1.356567 -0.093422 -0.187168 C 0.016082 -0.155785 -0.901712 H -0.073857 -1.131366 -1.402879 C -1.182272 0.041791 -0.003621 H 3.216351 0.899700 0.051033 H 2.066263 1.629438 -1.200305 C -2.436223 -0.730062 -0.276218 H -3.077690 -0.787232 0.612953 H -3.049946 -0.261625 -1.069359 H -2.223741 -1.753272 -0.610226 C 1.609772 -1.171282 0.837554 H 0.835169 -1.162595 1.61511…	37.6371 75.5579 118.7422 134.7178 156.2641 187.1432 290.3860 335.9753 366.8347 397.5948 444.8487 539.9506 706.6906 803.3596 830.0137 917.7628 925.8425 955.2794 976.3327 1000.4687 1011.7412 1035.3286 1078.2731 1081.0776 1196.5255 1273.1147 1292.0791 1314.6367 1372.5650 1427.2318 1436.1292 1444.7384 1469.9264 1492.5524 1500.5915 1506.9291 1509.8154 1514.3039 1524.3473 1526.1459 1733.9736 2944.8670 …	0	0	0	0	0	3	0	0	0	1	0	1	0	1	1	0	0	0	0	0	0	0	0	0	0	0	0	0	0	0	0	0	0	0	0
234	[CH]=C([CH3])[CH2][CH]([CH3])[CH3]	C7H13	20	-274.48	-274.299	-274.289	-274.433	-274.257	-274.247	38.8196	2	1 2 2.0 7 1.0 2 3 1.0 12 1.0 3 4 1.0 5 1.0 16 1.0 4 5 6 1.0 8 1.0 17 1.0 6 7 8 9 1.0 10 1.0 11 1.0 9 10 11 12 13 1.0 14 1.0 15 1.0 13 14 15 16 17 18 1.0 19 1.0 20 1.0 18 19 20	C 2.121172 1.074323 -0.603283 C 1.432171 0.012224 -0.236252 C 0.036929 -0.260553 -0.796021 H 0.040650 -1.263296 -1.250599 C -1.109416 -0.193871 0.241544 H -0.880349 -0.903060 1.050151 H 1.966250 1.916407 -1.268284 C -2.430303 -0.637481 -0.404387 H -3.249811 -0.624686 0.323872 H -2.708276 0.032581 -1.228440 H -2.357844 -1.653518 -0.810690 C 1.990521 -1.004998 0.738547 H 1.377104 -1.068242 1.646419…	44.5179 96.9757 174.3588 185.7685 227.1227 249.9609 310.1716 372.0796 373.1276 407.4289 446.6731 530.3905 687.7913 804.0774 825.4414 870.3780 915.3628 944.1709 961.7315 978.2254 1028.5349 1057.4409 1140.6159 1147.0638 1202.5729 1213.2127 1274.2123 1321.9376 1382.7991 1388.7098 1429.3469 1433.5252 1448.5215 1501.9109 1511.8917 1516.8180 1518.8048 1524.5404 1533.8011 1539.3560 1701.4852 3011.5382 3…	0	0	0	0	0	3	0	0	1	0	0	1	0	1	0	1	0	0	0	0	0	0	0	0	0	0	0	0	0	0	0	0	0	0	0
235	[CH2]=C([CH2])[CH2][CH]([CH3])[CH3]	C7H13	20	-274.519	-274.338	-274.328	-274.468	-274.292	-274.282	16.765	2	1 2 1.5 7 1.0 8 1.0 2 3 1.0 13 1.5 3 4 1.0 5 1.0 16 1.0 4 5 6 1.0 9 1.0 17 1.0 6 7 8 9 10 1.0 11 1.0 12 1.0 10 11 12 13 14 1.0 15 1.0 14 15 16 17 18 1.0 19 1.0 20 1.0 18 19 20	C 2.123570 0.959645 -0.550785 C 1.410008 -0.166546 -0.164412 C 0.016779 -0.412044 -0.728128 H -0.050230 -1.453790 -1.069550 C -1.134935 -0.151623 0.272650 H -0.938403 -0.761293 1.167064 H 3.115422 1.160755 -0.155302 H 1.720165 1.673205 -1.262354 C -2.474119 -0.605845 -0.325429 H -3.295538 -0.457561 0.385509 H -2.713368 -0.034004 -1.231701 H -2.453048 -1.667955 -0.598030 C 1.940534 -1.084053 0.740…	47.5356 88.6732 174.2366 231.2443 254.3628 319.0282 368.5669 402.4657 418.8147 463.8009 540.4011 560.0397 587.5492 756.1147 794.7819 832.3496 875.9750 906.7305 942.6105 969.9060 978.6362 996.7050 1057.2390 1114.3417 1147.3408 1203.8507 1254.3517 1323.3432 1363.6622 1380.1604 1390.2914 1407.6096 1429.3577 1448.2355 1513.6293 1514.3331 1519.5550 1526.6237 1534.5196 1539.7991 1556.2459 3017.7551 303…	0	1	0	0	0	2	2	0	0	0	0	0	0	1	0	1	0	0	0	0	0	0	0	0	0	0	0	0	0	0	0	0	0	0	0
236	C=C[C@H](C)C(C)C	C7H14	21	-275.161	-274.966	-274.956	-275.113	-274.923	-274.913	-17.1228	1	1 2 2.0 7 1.0 8 1.0 2 3 1.0 17 1.0 3 4 1.0 5 1.0 18 1.0 4 5 6 1.0 9 1.0 13 1.0 6 7 8 9 10 1.0 11 1.0 12 1.0 10 11 12 13 14 1.0 15 1.0 16 1.0 14 15 16 17 18 19 1.0 20 1.0 21 1.0 19 20 21	C -2.578189 -0.612938 0.290617 C -1.553857 -0.095249 -0.388463 C -0.283287 0.458168 0.212132 H -0.321941 0.296619 1.300447 C 0.970890 -0.287352 -0.330735 H 0.973725 -0.162216 -1.425647 H -3.475077 -0.971236 -0.208238 H -2.560482 -0.697633 1.375665 C 0.904803 -1.792445 -0.027058 H 1.769148 -2.314254 -0.454371 H 0.912444 -1.970923 1.056555 H -0.003729 -2.250056 -0.429858 C 2.285106 0.297451 0.21165…	63.5919 95.9491 204.5132 214.6656 229.3874 266.0112 283.1647 343.5350 379.3696 402.4006 450.1548 502.7141 690.7494 799.5154 873.3019 936.7990 939.0401 941.5610 973.4517 986.3617 1028.9309 1042.4118 1060.6183 1139.6317 1192.5584 1201.9658 1220.1108 1303.0049 1336.1762 1344.1720 1367.9084 1390.1913 1427.8195 1434.2008 1449.2497 1478.0710 1518.4728 1520.3825 1527.9423 1531.3606 1537.0088 1548.0139 1…	0	0	0	1	0	3	0	0	0	1	0	0	0	0	0	2	0	0	0	0	0	0	0	0	0	0	0	0	0	0	0	0	0	0	0
237	[CH2]=[CH][C@H]([CH3])C([CH3])[CH3]	C7H13	20	-274.501	-274.321	-274.311	-274.452	-274.277	-274.266	26.7542	2	1 2 2.0 6 1.0 7 1.0 2 3 1.0 16 1.0 3 4 1.0 5 1.0 17 1.0 4 5 8 1.0 12 1.0 6 7 8 9 1.0 10 1.0 11 1.0 9 10 11 12 13 1.0 14 1.0 15 1.0 13 14 15 16 17 18 1.0 19 1.0 20 1.0 18 19 20	C -2.359830 -0.953210 -0.311701 C -1.362698 -0.100707 -0.555740 C -0.361155 0.400514 0.470460 H -0.677003 0.009085 1.448634 C 1.010329 -0.177407 0.173619 H -3.031634 -1.290586 -1.096940 H -2.546019 -1.344194 0.686999 C 1.283185 -1.585527 0.608973 H 2.360324 -1.786826 0.668039 H 0.841453 -1.801417 1.590306 H 0.860622 -2.327582 -0.092556 C 1.883207 0.409844 -0.895017 H 1.611465 0.049291 -1.904833 H…	37.8551 82.4309 102.6165 112.0183 188.6898 230.1349 276.5909 297.3777 372.0048 383.5157 398.9562 535.4795 675.2695 755.3373 858.7640 929.1342 953.5339 960.7932 995.0398 996.6381 1033.8899 1061.4787 1079.0679 1084.5697 1178.6049 1244.1146 1298.4590 1321.3343 1336.2329 1378.9059 1426.1060 1431.1314 1445.0230 1470.8245 1500.2918 1508.5435 1512.3061 1523.9941 1526.4586 1534.8784 1714.1817 2953.0519 2…	0	0	0	1	0	3	0	0	0	1	0	0	0	0	1	1	0	0	0	0	0	0	0	0	0	0	0	0	0	0	0	0	0	0	0
238	[CH]=[CH][C@H]([CH3])[CH]([CH3])[CH3]	C7H13	20	-274.474	-274.294	-274.284	-274.429	-274.253	-274.243	41.0742	2	1 2 2.0 7 1.0 2 3 1.0 16 1.0 3 4 1.0 5 1.0 17 1.0 4 5 6 1.0 8 1.0 12 1.0 6 7 8 9 1.0 10 1.0 11 1.0 9 10 11 12 13 1.0 14 1.0 15 1.0 13 14 15 16 17 18 1.0 19 1.0 20 1.0 18 19 20	C 2.588867 -0.691297 -0.359113 C 1.607299 -0.155602 0.328261 C 0.331307 0.442182 -0.241441 H 0.345470 0.288558 -1.329405 C -0.923633 -0.279919 0.326857 H -0.891154 -0.173433 1.423391 H 3.554271 -1.137335 -0.153910 C -0.906913 -1.780480 -0.004316 H -1.772104 -2.286446 0.439923 H -0.950565 -1.938875 -1.089984 H 0.000416 -2.268836 0.363340 C -2.236111 0.349734 -0.167647 H -2.358232 1.383935 0.168690…	64.7315 97.4498 205.9939 216.6823 228.3194 274.9101 283.3768 352.3316 381.0389 405.5138 442.8827 500.4278 674.5995 762.6201 824.6252 842.9704 909.4547 940.4549 951.2563 974.4571 1007.5005 1059.4065 1133.9259 1169.1795 1191.1410 1201.9200 1256.1842 1321.2746 1349.0575 1367.9217 1390.9568 1427.9664 1434.3944 1449.5004 1518.2051 1520.1760 1526.7248 1531.2373 1536.8513 1547.7940 1689.2386 2995.5206 3…	0	0	0	1	0	3	0	0	1	0	0	0	0	0	0	2	0	0	0	0	0	0	0	0	0	0	0	0	0	0	0	0	0	0	0
239	[CH2]=C[C@H]([CH3])[CH]([CH3])[CH3]	C7H13	20	-274.482	-274.302	-274.292	-274.435	-274.259	-274.249	37.4645	2	1 2 2.0 7 1.0 8 1.0 2 3 1.0 3 4 1.0 5 1.0 17 1.0 4 5 6 1.0 9 1.0 13 1.0 6 7 8 9 10 1.0 11 1.0 12 1.0 10 11 12 13 14 1.0 15 1.0 16 1.0 14 15 16 17 18 1.0 19 1.0 20 1.0 18 19 20	C -2.692295 -0.588933 0.125076 C -1.556836 -0.080677 -0.296681 C -0.281966 0.472843 0.215796 H -0.284717 0.338703 1.316272 C 0.949502 -0.305443 -0.339489 H 0.930069 -0.194415 -1.433888 H -3.488528 -0.889409 -0.555540 H -2.899383 -0.739552 1.191913 C 0.857915 -1.803010 -0.011130 H 1.703855 -2.347981 -0.445804 H 0.880872 -1.966603 1.074702 H -0.066780 -2.244198 -0.394919 C 2.278040 0.268452 0.17661…	62.1137 94.4090 195.7203 212.3316 221.9911 256.5024 273.6367 335.1959 377.1635 396.3787 405.7214 493.5519 596.1044 775.5616 861.6529 880.1126 934.4358 941.3677 970.0864 977.1538 1005.6591 1058.6443 1127.4702 1162.9045 1196.5761 1201.4609 1287.0582 1317.7159 1368.9149 1376.8058 1427.8767 1433.8036 1445.5741 1448.9564 1517.8326 1520.2072 1526.5785 1530.9989 1536.2695 1547.1661 1753.3390 2917.5288 3…	0	0	1	0	0	3	0	0	0	1	0	0	0	0	0	2	0	0	0	0	0	0	0	0	0	0	0	0	0	0	0	0	0	0	0
240	[CH2]=[CH][C@H]([CH3])[C@H]([CH3])[CH2]	C7H13	20	-274.489	-274.31	-274.299	-274.444	-274.269	-274.258	31.4753	2	1 2 2.0 7 1.0 8 1.0 2 3 1.0 16 1.0 3 4 1.0 5 1.0 17 1.0 4 5 6 1.0 9 1.0 13 1.0 6 7 8 9 10 1.0 11 1.0 12 1.0 10 11 12 13 14 1.0 15 1.0 14 15 16 17 18 1.0 19 1.0 20 1.0 18 19 20	C -2.522263 -0.631831 0.309654 C -1.509287 -0.105055 -0.379806 C -0.247067 0.473752 0.209285 H -0.280274 0.332192 1.300335 C 1.028931 -0.253288 -0.318088 H 1.063886 -0.107832 -1.409187 H -3.415790 -1.009161 -0.181043 H -2.498442 -0.703841 1.395459 C 0.964518 -1.778653 -0.056218 H 1.856374 -2.277604 -0.450341 H 0.913210 -1.983954 1.020022 H 0.080972 -2.224688 -0.525385 C 2.277960 0.318880 0.277084…	72.1419 96.5406 99.1045 217.6180 231.0089 240.3271 275.6252 306.0976 343.3682 403.2842 445.6942 477.3794 553.0361 689.5557 795.0459 887.6948 926.6998 937.4465 959.0716 986.3456 1025.5233 1032.2458 1041.8782 1093.4292 1148.0533 1188.9890 1215.5205 1299.6685 1333.2670 1340.1393 1347.6426 1387.6774 1426.0618 1430.8804 1478.5346 1485.9962 1523.0325 1523.3974 1525.3063 1528.6960 1727.5706 3002.3887 30…	0	0	0	1	1	2	0	0	0	1	0	0	0	0	0	2	0	0	0	0	0	0	0	0	0	0	0	0	0	0	0	0	0	0	0
241	[CH2]=[CH][C@H]([CH2])[CH]([CH3])[CH3]	C7H13	20	-274.489	-274.31	-274.3	-274.444	-274.269	-274.259	31.2515	2	1 2 2.0 7 1.0 8 1.0 2 3 1.0 17 1.0 3 4 1.0 5 1.0 18 1.0 4 5 6 1.0 9 1.0 13 1.0 6 7 8 9 10 1.0 11 1.0 12 1.0 10 11 12 13 14 1.0 15 1.0 16 1.0 14 15 16 17 18 19 1.0 20 1.0 19 20	C -2.587639 -0.574761 0.311309 C -1.549538 -0.109855 -0.387514 C -0.281216 0.479809 0.205584 H -0.324963 0.336890 1.296272 C 0.999442 -0.224120 -0.323622 H 1.027364 -0.066315 -1.413928 H -3.482170 -0.953737 -0.176176 H -2.582182 -0.594214 1.399438 C 0.969460 -1.736349 -0.061808 H 1.867200 -2.218676 -0.466065 H 0.938409 -1.943933 1.016009 H 0.093795 -2.211965 -0.514541 C 2.264841 0.403121 0.279521…	76.9771 101.3096 183.5090 210.9209 229.6214 235.7532 279.9467 298.8619 358.0516 405.4956 445.6872 496.9955 553.4915 690.7072 791.5155 902.3379 928.4217 941.2532 945.9447 973.7200 993.9993 1034.1173 1076.5219 1096.9173 1168.3017 1200.0540 1207.5093 1293.2607 1320.0512 1333.8306 1367.0899 1391.4472 1428.0162 1447.8217 1468.7656 1481.4089 1517.2144 1520.7673 1532.4050 1539.0097 1708.3950 2995.9661 3…	0	0	0	1	1	2	0	0	0	1	0	0	0	0	0	2	0	0	0	0	0	0	0	0	0	0	0	0	0	0	0	0	0	0	0
242	C=CC(C)(C)CC	C7H14	21	-275.16	-274.966	-274.956	-275.115	-274.925	-274.915	-18.1195	1	1 2 2.0 6 1.0 7 1.0 2 3 1.0 12 1.0 3 4 1.0 13 1.0 18 1.0 4 5 1.0 8 1.0 17 1.0 5 6 7 8 9 1.0 10 1.0 11 1.0 9 10 11 12 13 14 1.0 15 1.0 16 1.0 14 15 16 17 18 19 1.0 20 1.0 21 1.0 19 20 21	C 1.746833 -1.527862 -0.087228 C 0.964026 -0.616566 -0.666962 C 0.126825 0.458317 0.001712 C -1.356933 0.291572 -0.441124 H -1.926079 1.148858 -0.054454 H 2.310767 -2.243689 -0.679753 H 1.862995 -1.600647 0.990604 C -2.043122 -1.009999 -0.012410 H -3.053027 -1.068024 -0.434281 H -1.483589 -1.887286 -0.355033 H -2.139574 -1.081506 1.076551 H 0.902578 -0.609219 -1.758140 C 0.245722 0.430295 1.53453…	96.8309 108.6839 216.3327 244.9856 253.1348 292.5700 295.4755 317.0733 363.9541 403.7034 455.0895 516.7070 697.8466 703.5987 794.5605 870.7769 936.0945 938.7065 954.7285 1017.7520 1022.5751 1048.1321 1049.1535 1091.9197 1107.8489 1205.1328 1241.4057 1271.7052 1341.9648 1360.6241 1383.0278 1424.4993 1440.9676 1442.1413 1475.6268 1509.6529 1518.3606 1523.7342 1529.3329 1532.8050 1539.5047 1549.1229…	0	0	0	1	0	3	0	0	0	1	0	0	0	1	0	0	1	0	0	0	0	0	0	0	0	0	0	0	0	0	0	0	0	0	0
243	[CH]=[CH]C([CH3])([CH3])[CH2][CH3]	C7H13	20	-274.474	-274.294	-274.284	-274.432	-274.256	-274.246	39.3055	2	1 2 2.0 6 1.0 2 3 1.0 11 1.0 3 4 1.0 12 1.0 17 1.0 4 5 1.0 7 1.0 16 1.0 5 6 7 8 1.0 9 1.0 10 1.0 8 9 10 11 12 13 1.0 14 1.0 15 1.0 13 14 15 16 17 18 1.0 19 1.0 20 1.0 18 19 20	C -1.525877 1.772401 -0.005831 C -0.912267 0.790077 -0.623861 C -0.215084 -0.410792 0.006195 C 1.269089 -0.437326 -0.458739 H 1.719627 -1.372376 -0.096709 H -2.066151 2.669769 -0.280555 C 2.133781 0.748049 -0.016603 H 3.135673 0.675724 -0.454999 H 1.695533 1.701210 -0.331933 H 2.254168 0.781505 1.071591 H -0.886499 0.798633 -1.724549 C -0.317171 -0.373871 1.540203 H 0.105073 0.547250 1.952880 H -…	90.0537 106.8736 211.7133 241.2645 249.9979 272.6397 283.8754 326.4458 365.1602 401.0429 467.6911 513.4251 679.9483 685.9342 789.3378 832.2715 836.4132 896.9916 952.9687 975.9042 1022.1764 1025.8345 1085.0980 1091.7849 1197.9714 1226.3011 1260.2569 1293.0226 1350.9324 1383.2291 1424.8991 1441.1644 1446.7093 1508.1469 1515.9144 1522.0956 1528.7930 1531.1979 1538.0947 1544.8027 1683.3599 3009.3380 …	0	0	0	1	0	3	0	0	1	0	0	0	0	1	0	0	1	0	0	0	0	0	0	0	0	0	0	0	0	0	0	0	0	0	0
244	[CH2]=[CH]C([CH3])([CH3])[CH][CH3]	C7H13	20	-274.494	-274.315	-274.304	-274.449	-274.275	-274.264	27.9843	2	1 2 2.0 5 1.0 6 1.0 2 3 1.0 11 1.0 3 4 1.0 12 1.0 17 1.0 4 7 1.0 16 1.0 5 6 7 8 1.0 9 1.0 10 1.0 8 9 10 11 12 13 1.0 14 1.0 15 1.0 13 14 15 16 17 18 1.0 19 1.0 20 1.0 18 19 20	C 1.616585 -1.632171 -0.095491 C 1.021030 -0.581739 -0.666032 C 0.140478 0.470432 0.002866 C -1.258747 0.265071 -0.544375 H 2.200432 -2.334356 -0.685157 H 1.558273 -1.833352 0.970518 C -2.162493 -0.828414 -0.075356 H -3.033044 -0.934552 -0.730458 H -1.644515 -1.800335 -0.045482 H -2.541459 -0.651935 0.943845 H 1.126054 -0.445897 -1.743964 C 0.162627 0.357524 1.539389 H -0.206252 -0.612835 1.88668…	41.3850 85.6296 103.3215 230.7290 250.2761 259.3363 279.9640 297.2848 355.6060 365.0875 436.9713 482.0432 515.7190 692.8221 711.7609 859.3358 925.8239 947.8412 953.7566 1002.9063 1021.3796 1040.2802 1045.1738 1088.1844 1126.9512 1206.4804 1218.9700 1273.7386 1346.2040 1382.1197 1420.9975 1437.0128 1439.9505 1470.9247 1502.4407 1516.0799 1519.4715 1521.2646 1531.0919 1545.6116 1707.0185 2995.5368 …	0	0	0	1	0	3	0	0	0	1	0	0	1	0	0	0	1	0	0	0	0	0	0	0	0	0	0	0	0	0	0	0	0	0	0
245	[CH2]=CC([CH3])([CH3])[CH2][CH3]	C7H13	20	-274.482	-274.302	-274.292	-274.437	-274.261	-274.25	36.4445	2	1 2 2.0 6 1.0 7 1.0 2 3 1.0 3 4 1.0 12 1.0 17 1.0 4 5 1.0 8 1.0 16 1.0 5 6 7 8 9 1.0 10 1.0 11 1.0 9 10 11 12 13 1.0 14 1.0 15 1.0 13 14 15 16 17 18 1.0 19 1.0 20 1.0 18 19 20	C 1.830849 -1.543762 -0.200154 C 0.991407 -0.604304 -0.573738 C 0.119586 0.466980 -0.022725 C -1.352964 0.234603 -0.473675 H -1.950696 1.081193 -0.107921 H 2.341549 -2.185185 -0.918343 H 2.067218 -1.735765 0.853166 C -1.992165 -1.081040 -0.018829 H -2.997297 -1.183925 -0.443117 H -1.398408 -1.941906 -0.344609 H -2.090524 -1.134549 1.071069 C 0.228699 0.493650 1.523148 H -0.048619 -0.467443 1.9663…	88.4429 103.8211 192.4666 224.3424 239.5666 257.2556 279.0835 308.8343 355.4374 392.0359 432.3783 483.5682 615.2008 685.9104 789.2374 867.7651 880.7039 920.3964 948.6796 1005.4739 1023.8995 1032.3387 1081.2694 1093.0882 1196.0274 1227.8134 1246.9671 1337.6046 1381.9855 1414.8483 1434.8149 1440.8885 1449.5488 1506.4524 1516.1971 1520.1315 1526.8490 1530.6146 1538.1889 1544.7450 1748.3762 3031.3311…	0	0	1	0	0	3	0	0	0	1	0	0	0	1	0	0	1	0	0	0	0	0	0	0	0	0	0	0	0	0	0	0	0	0	0
246	[CH2]=[CH][C@@]([CH2])([CH3])[CH2][CH3]	C7H13	20	-274.487	-274.308	-274.298	-274.444	-274.269	-274.259	31.2017	2	1 2 2.0 6 1.0 7 1.0 2 3 1.0 12 1.0 3 4 1.0 13 1.0 17 1.0 4 5 1.0 8 1.0 16 1.0 5 6 7 8 9 1.0 10 1.0 11 1.0 9 10 11 12 13 14 1.0 15 1.0 14 15 16 17 18 1.0 19 1.0 20 1.0 18 19 20	C 1.614702 -1.627731 -0.047296 C 1.003046 -0.593548 -0.625752 C 0.149504 0.471734 0.045002 C -1.328146 0.323041 -0.428186 H -1.896585 1.174354 -0.027404 H 2.201814 -2.333029 -0.629798 H 1.549933 -1.814863 1.021160 C -2.012511 -0.985802 -0.024526 H -3.044629 -1.011673 -0.392480 H -1.484141 -1.853062 -0.433707 H -2.041697 -1.101500 1.064822 H 1.097095 -0.469694 -1.706952 C 0.234186 0.429869 1.54153…	94.9624 117.9063 190.3267 221.1038 230.3410 260.8045 297.3472 310.6125 342.8428 395.2299 448.7768 502.2819 582.4769 696.3350 718.2588 800.2488 859.3249 941.5148 963.8467 991.2435 1002.8425 1025.4783 1045.6681 1060.4374 1098.3182 1121.9689 1234.3125 1269.4770 1337.0657 1359.0620 1375.4383 1422.7684 1440.2266 1460.0127 1487.4941 1513.8853 1523.2072 1525.1747 1525.9196 1538.0124 1722.5832 3025.0375 …	0	0	0	1	1	2	0	0	0	1	0	0	0	1	0	0	1	0	0	0	0	0	0	0	0	0	0	0	0	0	0	0	0	0	0
247	[CH2]=[CH]C([CH3])([CH3])[CH2][CH2]	C7H13	20	-274.489	-274.31	-274.3	-274.446	-274.271	-274.261	29.7605	2	1 2 2.0 6 1.0 7 1.0 2 3 1.0 11 1.0 3 4 1.0 12 1.0 17 1.0 4 5 1.0 8 1.0 16 1.0 5 6 7 8 9 1.0 10 1.0 9 10 11 12 13 1.0 14 1.0 15 1.0 13 14 15 16 17 18 1.0 19 1.0 20 1.0 18 19 20	C 1.922323 -1.258054 -0.083605 C 1.016344 -0.470152 -0.665092 C 0.016709 0.452549 0.006155 C -1.423976 0.033006 -0.428869 H -2.136189 0.771240 -0.032758 H 2.595877 -1.872419 -0.675511 H 2.035468 -1.323667 0.994923 C -1.837863 -1.341146 -0.026007 H -2.882107 -1.577974 0.150742 H -1.127841 -2.161685 -0.051962 H 0.965444 -0.459832 -1.756713 C 0.126332 0.432449 1.538905 H -0.071563 -0.565857 1.942764…	99.4757 134.5610 154.7620 233.6428 247.2031 282.3242 293.1718 311.1800 357.1147 395.7429 444.7005 494.8916 518.4250 701.1490 701.6337 833.1293 879.0520 938.2760 948.3820 960.5734 1022.1411 1039.3434 1050.7833 1068.4156 1107.5192 1173.3709 1216.7949 1234.0493 1319.6504 1354.0738 1367.7599 1423.9798 1441.0302 1473.8687 1481.3418 1494.4242 1516.9747 1521.4838 1532.5227 1540.9835 1724.2740 2927.4526 …	0	0	0	1	1	2	0	0	0	1	0	0	0	1	0	0	1	0	0	0	0	0	0	0	0	0	0	0	0	0	0	0	0	0	0
248	C=CCC(C)(C)C	C7H14	21	-275.162	-274.968	-274.958	-275.116	-274.926	-274.916	-18.9237	1	1 2 2.0 5 1.0 6 1.0 2 3 1.0 11 1.0 3 4 1.0 12 1.0 13 1.0 4 7 1.0 14 1.0 18 1.0 5 6 7 8 1.0 9 1.0 10 1.0 8 9 10 11 12 13 14 15 1.0 16 1.0 17 1.0 15 16 17 18 19 1.0 20 1.0 21 1.0 19 20 21	C 2.824613 -0.261212 0.055972 C 1.734968 0.460456 -0.212994 C 0.482469 -0.071764 -0.856041 C -0.808136 -0.023264 0.016955 H 3.707053 0.179578 0.512690 H 2.878210 -1.323292 -0.176474 C -1.973741 -0.571392 -0.828188 H -2.908219 -0.572689 -0.253792 H -2.134774 0.037326 -1.726793 H -1.779480 -1.601493 -1.151903 H 1.739350 1.522831 0.033806 H 0.653571 -1.111089 -1.167816 H 0.285286 0.501798 -1.775263 …	68.8822 101.6812 224.2891 234.9671 270.1091 274.8364 320.2096 338.8953 376.0219 412.5751 443.9401 464.4657 632.6265 764.9539 896.2479 906.0771 939.2416 945.3135 948.5706 972.2387 974.3751 1034.5341 1047.0132 1066.2236 1130.9701 1230.3155 1243.0416 1277.2134 1327.2891 1336.0788 1365.5994 1427.7479 1428.7080 1457.4491 1475.0796 1506.5154 1511.8312 1517.9891 1519.1057 1535.7057 1539.0396 1547.9128 1…	0	0	0	1	0	3	0	0	0	1	0	0	0	1	0	0	1	0	0	0	0	0	0	0	0	0	0	0	0	0	0	0	0	0	0
249	[CH2]=C[CH2]C([CH3])([CH3])[CH3]	C7H13	20	-274.484	-274.305	-274.294	-274.439	-274.263	-274.253	34.737	2	1 2 2.0 5 1.0 6 1.0 2 3 1.0 3 4 1.0 11 1.0 12 1.0 4 7 1.0 13 1.0 17 1.0 5 6 7 8 1.0 9 1.0 10 1.0 8 9 10 11 12 13 14 1.0 15 1.0 16 1.0 14 15 16 17 18 1.0 19 1.0 20 1.0 18 19 20	C 2.930217 -0.093307 0.071421 C 1.729250 0.307133 -0.279375 C 0.475412 -0.214798 -0.855662 C -0.795831 -0.007671 0.021216 H 3.677826 0.584867 0.481957 H 3.246356 -1.138624 -0.034735 C -2.001269 -0.595778 -0.734522 H -2.922997 -0.471833 -0.153546 H -2.146885 -0.098168 -1.701489 H -1.868741 -1.668094 -0.924877 H 0.598219 -1.295883 -1.056567 H 0.303579 0.259478 -1.833627 C -1.022669 1.495958 0.26201…	84.2463 91.1306 205.4515 226.6501 271.0186 271.9057 301.4045 327.6119 343.5079 404.3482 411.0069 443.4185 556.9124 748.7196 875.6392 882.3033 900.1856 942.5284 948.6681 958.9854 973.7380 1019.1409 1064.2657 1086.9981 1195.1515 1238.4401 1276.1719 1313.7976 1347.6538 1426.9638 1428.2448 1444.3868 1457.2152 1479.7558 1510.1827 1516.5257 1518.2223 1534.7213 1535.3812 1546.7444 1757.0673 2947.7805 30…	0	0	1	0	0	3	0	0	0	1	0	0	0	1	0	0	1	0	0	0	0	0	0	0	0	0	0	0	0	0	0	0	0	0	0
250	[CH]=[CH][CH2]C([CH3])([CH3])[CH3]	C7H13	20	-274.475	-274.295	-274.285	-274.432	-274.256	-274.246	39.3397	2	1 2 2.0 5 1.0 2 3 1.0 10 1.0 3 4 1.0 11 1.0 12 1.0 4 6 1.0 13 1.0 17 1.0 5 6 7 1.0 8 1.0 9 1.0 7 8 9 10 11 12 13 14 1.0 15 1.0 16 1.0 14 15 16 17 18 1.0 19 1.0 20 1.0 18 19 20	C 2.844984 -0.361336 -0.009428 C 1.799483 0.418339 -0.169401 C 0.517769 0.039812 -0.879570 C -0.755581 -0.023738 0.015040 H 3.828766 -0.287028 0.437945 C -1.951000 -0.373286 -0.892198 H -2.876862 -0.446730 -0.308730 H -2.102369 0.391441 -1.664337 H -1.797759 -1.334593 -1.397957 H 1.844234 1.440354 0.231247 H 0.657215 -0.933296 -1.365150 H 0.336015 0.772160 -1.680639 C -1.017910 1.336184 0.689963 …	69.4587 101.2065 223.5228 243.2185 268.3163 274.0307 321.5621 340.9863 375.1840 412.3997 435.0148 467.5016 639.7054 747.5209 812.9770 828.0907 904.7272 925.5427 947.9876 950.7957 972.3485 1024.7586 1064.1903 1099.0900 1194.7876 1236.5361 1275.0267 1281.5502 1330.0923 1364.3314 1427.5660 1428.6219 1457.7897 1503.8234 1511.4590 1517.6795 1518.7190 1535.5348 1538.7051 1547.6067 1691.3728 3017.6073 3…	0	0	0	1	0	3	0	0	1	0	0	0	0	1	0	0	1	0	0	0	0	0	0	0	0	0	0	0	0	0	0	0	0	0	0
251	[CH2]=[CH][CH2]C([CH3])([CH2])[CH3]	C7H13	20	-274.489	-274.31	-274.3	-274.445	-274.271	-274.26	30.1649	2	1 2 2.0 5 1.0 6 1.0 2 3 1.0 11 1.0 3 4 1.0 12 1.0 13 1.0 4 7 1.0 14 1.0 17 1.0 5 6 7 8 1.0 9 1.0 10 1.0 8 9 10 11 12 13 14 15 1.0 16 1.0 15 16 17 18 1.0 19 1.0 20 1.0 18 19 20	C 2.830210 0.254288 0.055557 C 1.713171 -0.472098 -0.006587 C 0.470516 -0.220637 0.802719 C -0.828830 -0.013175 -0.037302 H 3.702740 0.017551 -0.547934 H 2.917901 1.113593 0.718121 C -1.996324 0.247847 0.953337 H -2.937900 0.402843 0.414872 H -2.133431 -0.599276 1.635461 H -1.799178 1.142934 1.558190 H 1.670732 -1.322671 -0.688495 H 0.622086 0.655272 1.447633 H 0.299269 -1.077561 1.473181 C -1.13…	85.8955 100.9901 115.3865 211.7631 238.1328 274.1906 298.1028 335.4339 369.5152 399.1049 434.6748 457.1732 543.6742 633.7056 777.6750 890.5652 914.4346 938.2305 940.9330 952.0477 970.8720 994.1537 1038.1800 1046.3944 1119.1967 1167.8169 1231.2360 1264.2147 1325.1971 1329.5345 1353.0801 1419.7176 1439.5260 1472.9252 1486.4139 1505.2320 1514.3926 1520.3047 1530.8512 1538.1315 1730.2468 3007.1364 30…	0	0	0	1	1	2	0	0	0	1	0	0	0	1	0	0	1	0	0	0	0	0	0	0	0	0	0	0	0	0	0	0	0	0	0
252	CCC(=C(C)C)C	C7H14	21	-275.169	-274.975	-274.965	-275.118	-274.928	-274.918	-19.8909	1	1 2 2.0 9 1.0 13 1.0 2 3 1.0 17 1.0 3 4 1.0 5 1.0 6 1.0 4 7 1.0 8 1.0 21 1.0 5 6 7 8 9 10 1.0 11 1.0 12 1.0 10 11 12 13 14 1.0 15 1.0 16 1.0 14 15 16 17 18 1.0 19 1.0 20 1.0 18 19 20 21	C -0.988420 -0.210804 -0.039377 C 0.171513 0.452403 -0.225289 C 1.477110 -0.237508 -0.596843 C 2.330273 -0.625110 0.625198 H 2.062284 0.443206 -1.230655 H 1.298233 -1.128885 -1.206574 H 1.811864 -1.363897 1.246438 H 2.542754 0.245451 1.256683 C -1.124716 -1.713505 -0.164484 H -1.528584 -2.137980 0.765673 H -1.841477 -1.975907 -0.956108 H -0.187119 -2.229253 -0.378331 C -2.304486 0.444515 0.318430…	70.8303 97.6032 122.9542 140.9577 153.0845 223.2759 238.5630 343.8353 387.5691 414.4471 425.5886 491.1090 586.6477 688.2425 796.4463 880.9709 967.0626 977.5985 989.9446 1026.5145 1058.3027 1084.7974 1105.9759 1115.6638 1170.7867 1204.8264 1279.6317 1314.6620 1372.1041 1433.9952 1435.1366 1440.4296 1455.9043 1505.1781 1507.4855 1514.5172 1520.9725 1524.2899 1529.7202 1531.0526 1537.0179 1550.4554 …	0	0	0	0	0	4	0	0	0	0	0	2	0	1	0	0	0	0	0	0	0	0	0	0	0	0	0	0	0	0	0	0	0	0	0
253	[CH2][CH2]C(=C([CH3])[CH3])[CH3]	C7H13	20	-274.497	-274.318	-274.307	-274.448	-274.274	-274.263	28.7564	2	1 2 2.0 8 1.0 12 1.0 2 3 1.0 16 1.0 3 4 1.0 5 1.0 6 1.0 4 7 1.0 20 1.0 5 6 7 8 9 1.0 10 1.0 11 1.0 9 10 11 12 13 1.0 14 1.0 15 1.0 13 14 15 16 17 1.0 18 1.0 19 1.0 17 18 19 20	C -0.968170 -0.183539 -0.033790 C 0.235111 0.399503 -0.209323 C 1.504005 -0.377085 -0.543030 C 2.376248 -0.633658 0.647703 H 2.078977 0.190291 -1.290955 H 1.260621 -1.327360 -1.044920 H 1.934857 -0.827864 1.620411 C -1.207697 -1.676202 -0.121550 H -1.705375 -2.032822 0.791221 H -1.886636 -1.915566 -0.952816 H -0.299842 -2.268103 -0.248289 C -2.243134 0.570314 0.277422 H -2.639507 0.277186 1.26022…	55.4471 91.1569 120.6624 133.6265 141.0838 150.6246 236.2546 343.1485 385.5944 413.0975 419.8121 455.4838 493.0494 589.6490 685.7065 850.0164 885.7607 972.8102 989.5201 1021.0618 1034.4574 1066.3566 1099.0354 1115.4411 1139.7435 1177.1229 1236.3947 1285.1225 1361.8187 1433.3290 1439.7739 1454.0388 1480.2053 1497.2406 1504.5644 1512.6808 1519.7954 1523.6533 1534.9440 1537.2819 1745.2754 2988.1629 …	0	0	0	0	1	3	0	0	0	0	0	2	0	1	0	0	0	0	0	0	0	0	0	0	0	0	0	0	0	0	0	0	0	0	0
254	[CH3]/[CH]=C(\[CH3])/C([CH3])[CH3] or [CH3][CH]C(=C([CH3])[CH3])[CH3]	C7H13	20	-274.527	-274.348	-274.337	-274.474	-274.299	-274.288	12.9266	2	1 2 1.5 8 1.0 12 1.0 2 3 1.5 16 1.0 3 4 1.0 5 1.0 4 6 1.0 7 1.0 20 1.0 5 6 7 8 9 1.0 10 1.0 11 1.0 9 10 11 12 13 1.0 14 1.0 15 1.0 13 14 15 16 17 1.0 18 1.0 19 1.0 17 18 19 20	C -1.105095 -0.165372 0.000000 C 0.246330 0.234892 0.000000 C 1.276978 -0.700137 -0.000003 C 2.750385 -0.396417 -0.000002 H 1.011343 -1.752914 -0.000008 H 3.063088 0.183133 0.880968 H 3.063088 0.183133 -0.880972 C -1.495739 -1.624113 0.000004 H -2.584711 -1.738194 0.000019 H -1.111197 -2.156744 -0.881331 H -1.111174 -2.156744 0.881330 C -2.251141 0.808610 -0.000005 H -2.898092 0.655823 0.878057 H…	60.1365 70.9865 105.3687 122.4152 151.1948 178.8160 228.6697 330.1546 337.2052 377.6217 475.8649 510.3803 514.4265 719.0027 722.6293 881.8316 974.9627 992.3918 1002.5736 1029.8561 1053.2045 1063.3799 1077.8542 1099.3307 1174.7062 1246.1880 1340.9387 1424.9145 1432.3087 1440.1723 1449.0243 1456.0407 1485.2954 1506.0046 1514.0857 1517.0231 1520.5352 1525.2005 1535.4166 1537.3825 1541.7795 3002.5282…	1	1	0	0	0	4	0	0	0	0	1	0	0	0	0	0	0	0	0.0497871	0	0	0	0.0525126	0	0	0	0	0.00247875	0	0	0	0	0	0	0
255	C(=[CH2])(C([CH2][CH3])[CH3])[CH3] or [CH3][CH2]/C(=C(\[CH3])/[CH2])/[CH3]	C7H13	20	-274.525	-274.344	-274.334	-274.473	-274.297	-274.286	13.8855	2	1 2 1.5 9 1.0 13 1.5 2 3 1.0 16 1.0 3 4 1.0 5 1.0 6 1.0 4 7 1.0 8 1.0 20 1.0 5 6 7 8 9 10 1.0 11 1.0 12 1.0 10 11 12 13 14 1.0 15 1.0 14 15 16 17 1.0 18 1.0 19 1.0 17 18 19 20	C -1.113596 -0.172586 0.002041 C 0.146522 0.420974 -0.237015 C 1.372701 -0.385612 -0.584437 C 2.338236 -0.567562 0.607534 H 1.917943 0.121922 -1.394116 H 1.100269 -1.373018 -0.970408 H 1.855470 -1.117611 1.423071 H 2.664208 0.399629 1.006764 C -1.276264 -1.681053 -0.109130 H -2.292598 -1.981422 0.161812 H -1.088979 -2.037772 -1.129637 H -0.585439 -2.218669 0.551223 C -2.226702 0.575734 0.335394 H…	59.0055 79.9615 128.7819 182.6698 211.6381 227.1960 295.7425 385.1460 398.2488 464.8860 493.8598 542.9096 606.8392 704.4506 783.0080 799.2559 896.2313 961.8482 1010.4084 1018.2509 1023.8984 1053.6235 1069.1826 1085.4984 1199.2616 1246.0809 1304.7627 1358.2544 1378.1874 1429.6931 1431.5458 1436.8297 1453.2907 1510.9781 1514.3184 1521.0913 1521.9628 1528.0841 1534.2501 1541.2374 1561.4472 3017.5773…	0	1	0	0	0	3	1	0	0	0	1	0	0	1	0	0	0	0	0	0	0	0	0	0	0	0	0	0	0	0	0	0	0	0	0
256	[CH3][CH2]C(=[CH2])C([CH3])[CH3] or [CH3][CH2]C(=C([CH3])[CH3])[CH2]	C7H13	20	-274.524	-274.344	-274.334	-274.473	-274.296	-274.286	14.094	2	1 2 1.5 9 1.0 13 1.0 2 3 1.0 17 1.5 3 4 1.0 5 1.0 6 1.0 4 7 1.0 8 1.0 20 1.0 5 6 7 8 9 10 1.0 11 1.0 12 1.0 10 11 12 13 14 1.0 15 1.0 16 1.0 14 15 16 17 18 1.0 19 1.0 18 19 20	C -0.949849 -0.258329 -0.054568 C 0.166043 0.588081 -0.226387 C 1.537540 0.018866 -0.577170 C 2.298519 -0.530721 0.641249 H 2.136603 0.813091 -1.037798 H 1.448243 -0.766103 -1.337657 H 1.755093 -1.353815 1.118647 H 2.437695 0.252684 1.394642 C -0.900895 -1.752696 -0.214430 H -1.191271 -2.256408 0.720763 H -1.625222 -2.088435 -0.972350 H 0.080441 -2.134992 -0.501682 C -2.298674 0.308491 0.318504 H…	55.4997 93.6825 113.6374 143.2415 216.3505 235.4981 312.8316 341.4866 393.7713 449.9433 490.6643 579.0692 624.9588 699.4525 777.2908 806.6953 870.5409 972.7341 995.0652 1000.6392 1019.7877 1073.6923 1073.9234 1097.2956 1204.0887 1242.5400 1296.7723 1355.0665 1393.6344 1423.6866 1433.8958 1441.4583 1448.0148 1507.4855 1515.1883 1516.3295 1523.0157 1527.5963 1534.1647 1548.3059 1557.8890 3005.7949 …	0	1	0	0	0	3	1	0	0	0	1	0	0	1	0	0	0	0	0	0	0	0	0	0	0	0	0	0	0	0	0	0	0	0	0
257	CC(C)C=C(C)C	C7H14	21	-275.171	-274.977	-274.967	-275.119	-274.93	-274.92	-20.9597	1	1 2 2.0 8 1.0 12 1.0 2 3 1.0 17 1.0 3 4 1.0 5 1.0 18 1.0 4 6 1.0 7 1.0 16 1.0 5 6 7 8 9 1.0 10 1.0 11 1.0 9 10 11 12 13 1.0 14 1.0 15 1.0 13 14 15 16 17 18 19 1.0 20 1.0 21 1.0 19 20 21	C -1.309459 -0.043417 0.000000 C -0.053653 -0.516295 0.000010 C 1.252928 0.239980 -0.000007 C 2.066297 -0.088013 1.267370 H 1.055727 1.318790 -0.000035 H 2.288563 -1.161525 1.322703 H 1.514723 0.185060 2.173634 C -1.686477 1.418766 -0.000032 H -2.299914 1.660435 0.879373 H -0.824392 2.089688 -0.000078 H -2.299966 1.660383 -0.879415 C -2.489407 -0.987777 0.000022 H -2.174334 -2.036064 0.000057 H -…	41.8575 121.0782 153.3068 201.9820 207.9457 232.0374 261.0559 301.6089 397.1887 397.5511 449.0767 502.3699 515.3939 811.6841 865.7545 878.9283 938.2306 964.0268 969.9513 976.0880 1032.1338 1100.6588 1117.8558 1127.1785 1150.6245 1206.1798 1248.5787 1343.9166 1352.3762 1412.0340 1422.7467 1438.1686 1445.3483 1450.9707 1502.4747 1517.6235 1517.8167 1520.2798 1520.7762 1526.5845 1532.3828 1539.1582 …	0	0	0	1	0	4	0	0	0	0	0	1	0	0	0	1	0	0	0	0	0	0	0	0	0	0	0	0	0	0	0	0	0	0	0
258	[CH2][C@@H]([CH3])[CH]=C([CH3])[CH3]	C7H13	20	-274.498	-274.319	-274.309	-274.449	-274.274	-274.263	28.451	2	1 2 2.0 7 1.0 11 1.0 2 3 1.0 16 1.0 3 4 1.0 5 1.0 17 1.0 4 6 1.0 15 1.0 5 6 7 8 1.0 9 1.0 10 1.0 8 9 10 11 12 1.0 13 1.0 14 1.0 12 13 14 15 16 17 18 1.0 19 1.0 20 1.0 18 19 20	C 1.262467 -0.058363 0.007915 C 0.002801 -0.494733 -0.156795 C -1.303439 0.249124 0.068499 C -1.947506 0.502558 -1.264128 H -1.088567 1.216578 0.539721 H -1.569578 1.287177 -1.912979 C 1.648710 1.317876 0.492800 H 2.258462 1.836140 -0.260775 H 0.791355 1.955078 0.721711 H 2.268896 1.250397 1.397627 C 2.434606 -0.962154 -0.296757 H 2.111320 -1.948700 -0.643466 H 3.081110 -0.524902 -1.071252 H 3.06…	50.0791 117.7707 151.3922 155.8270 204.9550 208.5560 251.5038 286.9756 376.4983 398.6271 438.2083 486.9108 514.0486 563.4252 813.7713 869.0093 879.3230 926.5145 963.6212 975.7740 1029.9397 1070.6546 1116.3150 1118.5725 1138.0050 1181.0043 1236.2136 1309.6030 1352.4796 1398.6307 1429.3154 1439.1253 1450.6753 1482.4069 1502.0799 1517.1855 1520.1550 1524.4739 1525.7357 1528.4705 1732.9859 3021.1699 …	0	0	0	1	1	3	0	0	0	0	0	1	0	0	0	1	0	0	0	0	0	0	0	0	0	0	0	0	0	0	0	0	0	0	0
259	[CH2]=C([CH3])[CH][CH]([CH3])[CH3] or [CH3][CH]([CH3])/[CH]=C(\[CH3])/[CH2]	C7H13	20	-274.523	-274.343	-274.333	-274.47	-274.294	-274.284	15.3308	2	1 2 1.5 8 1.0 12 1.5 2 3 1.0 16 1.0 3 4 1.0 5 1.0 17 1.0 4 6 1.0 7 1.0 15 1.0 5 6 7 8 9 1.0 10 1.0 11 1.0 9 10 11 12 13 1.0 14 1.0 13 14 15 16 17 18 1.0 19 1.0 20 1.0 18 19 20	C -1.412949 -0.117013 -0.000034 C -0.096053 -0.589934 -0.000212 C 1.167669 0.224093 0.000112 C 2.002024 -0.060548 1.267432 H 0.911652 1.290931 0.000604 H 2.282462 -1.120144 1.319501 H 1.439948 0.180942 2.176115 C -1.698735 1.375665 0.000551 H -2.775632 1.567755 0.000603 H -1.273148 1.868734 0.882762 H -1.273107 1.869438 -0.881246 C -2.480668 -1.002582 -0.000390 H -2.320186 -2.077115 -0.000802 H -…	29.7203 111.1808 141.5258 187.8423 232.1363 258.7950 309.3435 393.3330 406.3327 457.5368 488.2093 529.0804 567.3467 753.4968 796.8393 822.6207 870.2668 938.8988 945.7248 966.1515 1019.9324 1063.4381 1069.8631 1108.5695 1177.2880 1207.8145 1291.5204 1352.3674 1352.9278 1398.8628 1420.8923 1440.0041 1446.8932 1485.1583 1516.7971 1518.6905 1520.0377 1528.4666 1532.3804 1538.9916 1545.5251 3036.7068 …	1	1	0	0	0	3	1	0	0	0	0	0	0	0	0	1	0	0	0.0497871	0	0	0	0.00743626	0.00247875	0	0	0	0	0	0	0	0	0.0497871	0	0
260	[CH3]C([CH3])[CH]=C([CH3])[CH3]	C7H13	20	-274.531	-274.351	-274.34	-274.476	-274.3	-274.289	12.0398	2	1 2 1.5 7 1.0 11 1.0 2 3 1.5 16 1.0 3 4 1.0 17 1.0 4 5 1.0 6 1.0 15 1.0 5 6 7 8 1.0 9 1.0 10 1.0 8 9 10 11 12 1.0 13 1.0 14 1.0 12 13 14 15 16 17 18 1.0 19 1.0 20 1.0 18 19 20	C 1.278220 -0.111472 0.020834 C 0.000000 -0.672424 0.000000 C -1.278220 -0.111472 -0.020834 C -2.478750 -1.013000 0.100715 H -3.087378 -0.752009 0.980935 H -2.198170 -2.067092 0.193865 C 1.597758 1.355708 0.153338 H 1.708945 1.846588 -0.826905 H 0.839837 1.909066 0.712354 H 2.555599 1.489559 0.672661 C 2.478750 -1.013000 -0.100715 H 2.198170 -2.067092 -0.193865 H 3.087378 -0.752009 -0.980935 H 3.…	69.6870 89.4939 139.2629 147.9914 167.8700 211.2070 258.7058 324.7826 353.7941 376.3760 426.0247 480.5186 571.0643 805.6540 848.6214 899.6814 973.0463 982.8871 1001.3862 1012.7703 1039.2938 1079.0943 1083.2337 1087.9325 1182.9374 1281.4427 1379.7633 1422.8309 1427.4931 1437.6765 1440.4363 1450.8567 1493.8292 1503.7003 1507.8227 1512.1067 1514.1453 1521.7638 1538.8849 1541.6829 1544.6267 3000.1107…	0	0	0	0	0	4	0	1	0	0	2	0	0	0	0	0	0	0	0	0	0	0	0	0	0	0	0	0	0	0	0	0	0	0	0
261	[CH3][CH]([CH3])C=C([CH3])[CH3]	C7H13	20	-274.492	-274.311	-274.301	-274.441	-274.264	-274.254	34.3264	2	1 2 2.0 8 1.0 12 1.0 2 3 1.0 3 4 1.0 5 1.0 17 1.0 4 6 1.0 7 1.0 16 1.0 5 6 7 8 9 1.0 10 1.0 11 1.0 9 10 11 12 13 1.0 14 1.0 15 1.0 13 14 15 16 17 18 1.0 19 1.0 20 1.0 18 19 20	C -1.330619 -0.059049 0.000001 C -0.046831 -0.366926 0.000009 C 1.300208 0.248763 -0.000006 C 2.088843 -0.125690 1.271651 H 1.170883 1.347860 -0.000035 H 2.249446 -1.208793 1.321184 H 1.548121 0.176165 2.174623 C -1.836826 1.376016 -0.000034 H -2.463521 1.565527 0.882344 H -1.021864 2.105589 -0.000053 H -2.463522 1.565483 -0.882421 C -2.407968 -1.124952 0.000026 H -1.977168 -2.129811 0.000052 H -…	39.3480 113.0092 143.1203 171.5410 201.0450 226.5401 251.2171 286.9600 377.5003 382.0616 416.7620 511.1387 535.9713 755.7313 853.0588 937.4180 951.2672 970.6176 972.9581 975.6167 1104.7825 1111.8422 1125.5184 1142.2904 1199.6829 1211.5031 1328.0939 1339.2074 1421.0980 1421.6671 1436.4659 1442.5743 1503.6496 1513.3274 1516.5313 1519.1583 1520.1805 1521.7127 1528.9622 1538.9111 1783.0974 2934.5841 …	0	0	1	0	0	4	0	0	0	0	0	1	0	0	0	1	0	0	0	0	0	0	0	0	0	0	0	0	0	0	0	0	0	0	0
262	C/C=C(\C)/C(C)C	C7H14	21	-275.168	-274.974	-274.964	-275.118	-274.928	-274.918	-19.8807	1	1 2 2.0 8 1.0 17 1.0 2 3 1.0 18 1.0 3 4 1.0 5 1.0 13 1.0 4 6 1.0 7 1.0 12 1.0 5 6 7 8 9 1.0 10 1.0 11 1.0 9 10 11 12 13 14 1.0 15 1.0 16 1.0 14 15 16 17 18 19 1.0 20 1.0 21 1.0 19 20 21	C -1.407707 -0.701557 0.083314 C -0.328696 0.092715 -0.006792 C 1.065633 -0.525837 0.066437 C 1.859409 -0.342924 -1.242518 H 0.926414 -1.605759 0.211387 H 2.092481 0.711467 -1.432828 H 1.297416 -0.724982 -2.102139 C -2.864245 -0.330624 0.037674 H -3.037357 0.740783 -0.092744 H -3.373141 -0.851949 -0.784959 H -3.373432 -0.638681 0.961481 H 2.812305 -0.883446 -1.192156 C 1.878270 -0.006956 1.269103…	17.7307 104.2581 128.9771 177.5570 240.9763 247.7653 259.4546 308.0643 322.3097 353.1185 485.6112 543.0926 549.5444 737.2198 864.2914 879.9950 937.9050 965.9972 969.3127 1010.6599 1072.2646 1074.3781 1103.6922 1129.3557 1130.5143 1202.6795 1254.7876 1355.7739 1359.1140 1410.7948 1421.9635 1441.2604 1448.2316 1453.3807 1510.3060 1514.6793 1517.9733 1518.9859 1527.1526 1531.0986 1537.7389 1541.3724…	0	0	0	1	0	4	0	0	0	0	0	1	0	0	0	1	0	0	0	0	0	0	0	0	0	0	0	0	0	0	0	0	0	0	0
263	[CH](=[CH2])C([CH]([CH3])[CH3])[CH3] or [CH2]/[CH]=C(\[CH3])/[CH]([CH3])[CH3]	C7H13	20	-274.524	-274.344	-274.334	-274.473	-274.297	-274.286	13.87	2	1 2 1.5 8 1.5 16 1.0 2 3 1.0 17 1.0 3 4 1.0 5 1.0 12 1.0 4 6 1.0 7 1.0 11 1.0 5 6 7 8 9 1.0 10 1.0 9 10 11 12 13 1.0 14 1.0 15 1.0 13 14 15 16 17 18 1.0 19 1.0 20 1.0 18 19 20	C -1.491972 -0.761489 0.033809 C -0.369547 0.073739 -0.004312 C 1.023823 -0.521147 0.026650 C 1.816528 -0.213956 -1.262000 H 0.911100 -1.612433 0.086011 H 1.982628 0.862813 -1.385935 H 1.285013 -0.576146 -2.148798 C -2.815781 -0.366411 0.017075 H -3.108716 0.677888 -0.028951 H -3.617015 -1.097373 0.049991 H 2.800403 -0.697688 -1.232439 C 1.818940 -0.075455 1.272494 H 1.985135 1.008410 1.277633 H …	26.4573 73.8658 169.8853 224.3896 231.2069 260.3398 282.4988 291.6493 335.4028 448.9991 488.7126 552.3520 610.2217 728.8822 771.6129 887.2460 937.7998 965.7483 973.9188 981.9849 1027.0747 1031.0488 1111.4959 1117.1291 1179.2798 1251.9104 1255.5948 1331.6516 1356.2880 1411.9892 1421.2626 1438.5609 1446.2913 1475.6641 1507.5635 1518.4025 1523.2227 1525.4802 1534.3364 1543.4398 1550.6892 3024.2422 3…	0	0	0	0	0	3	1	1	0	0	1	0	0	0	0	1	0	0	0	0	0	0	0	0	0	0	0	0	0	0	0	0	0	0	0
264	[CH3]/C=C(\[CH3])/[CH]([CH3])[CH3]	C7H13	20	-274.49	-274.309	-274.298	-274.44	-274.264	-274.253	34.8122	2	1 2 2.0 8 1.0 2 3 1.0 17 1.0 3 4 1.0 5 1.0 13 1.0 4 6 1.0 7 1.0 12 1.0 5 6 7 8 9 1.0 10 1.0 11 1.0 9 10 11 12 13 14 1.0 15 1.0 16 1.0 14 15 16 17 18 1.0 19 1.0 20 1.0 18 19 20	C -1.439393 -0.610128 -0.000003 C -0.338644 0.118506 -0.000001 C 1.034490 -0.561002 -0.000005 C 1.843569 -0.231998 -1.268758 H 0.844805 -1.641663 -0.000014 H 2.106545 0.831544 -1.318129 H 1.278543 -0.482968 -2.173384 C -2.908075 -0.491251 -0.000005 H -3.236067 0.562477 0.000012 H -3.350563 -0.970159 -0.883424 H -3.350569 -0.970188 0.883395 H 2.780844 -0.801277 -1.284762 C 1.843561 -0.232017 1.268…	36.4561 113.8654 142.8627 181.1936 183.6495 247.5963 255.9761 281.0844 305.4182 320.5406 469.2991 517.2477 552.0291 708.9328 871.9108 938.3642 960.4306 969.5781 1017.4125 1032.3834 1056.8542 1061.0647 1130.3993 1135.3146 1195.4339 1229.0685 1363.5835 1368.2529 1417.5038 1421.7001 1433.6036 1445.2389 1489.7302 1505.3868 1508.0748 1518.8914 1520.5628 1529.3085 1535.6121 1540.5527 1780.9866 2980.607…	0	0	1	0	0	4	0	0	0	0	0	1	0	0	0	1	0	0	0	0	0	0	0	0	0	0	0	0	0	0	0	0	0	0	0
265	[CH3]/[CH]=C(\[CH3])/[C@@H]([CH2])[CH3]	C7H13	20	-274.496	-274.318	-274.307	-274.449	-274.274	-274.263	28.4272	2	1 2 2.0 7 1.0 16 1.0 2 3 1.0 17 1.0 3 4 1.0 5 1.0 12 1.0 4 6 1.0 11 1.0 5 6 7 8 1.0 9 1.0 10 1.0 8 9 10 11 12 13 1.0 14 1.0 15 1.0 13 14 15 16 17 18 1.0 19 1.0 20 1.0 18 19 20	C -1.376769 -0.696628 0.101010 C -0.294818 0.087253 -0.023726 C 1.103439 -0.536417 0.024948 C 1.818106 -0.398050 -1.286800 H 0.953893 -1.614500 0.219196 H 1.294564 -0.591595 -2.218433 C -2.828163 -0.304894 0.083874 H -2.986173 0.764007 -0.081977 H -3.370376 -0.849452 -0.701374 H -3.313220 -0.567030 1.034507 H 2.891803 -0.238019 -1.330037 C 1.955898 0.010255 1.189346 H 2.173537 1.076431 1.062475 H…	60.6501 102.7083 115.3803 131.4904 178.1006 242.7054 255.6179 303.5279 320.0453 347.2649 448.2820 499.9641 544.9329 585.4415 750.8338 865.3705 886.6227 936.2004 971.6504 1001.8673 1060.9812 1074.1444 1075.3875 1102.8149 1142.7186 1165.5121 1245.4596 1297.8709 1333.8147 1401.5567 1428.4818 1443.5425 1448.6037 1481.3506 1510.1278 1514.5262 1518.3268 1525.7290 1531.2149 1535.9765 1747.6914 2939.2602…	0	0	0	1	1	3	0	0	0	0	0	1	0	0	0	1	0	0	0	0	0	0	0	0	0	0	0	0	0	0	0	0	0	0	0
266	C/C=C/C(C)(C)C	C7H14	21	-275.167	-274.974	-274.963	-275.119	-274.93	-274.92	-21.0964	1	1 2 2.0 17 1.0 18 1.0 2 3 1.0 12 1.0 3 4 1.0 8 1.0 13 1.0 4 5 1.0 6 1.0 7 1.0 5 6 7 8 9 1.0 10 1.0 11 1.0 9 10 11 12 13 14 1.0 15 1.0 16 1.0 14 15 16 17 18 19 1.0 20 1.0 21 1.0 19 20 21	C 1.654192 0.328903 -0.000002 C 0.566537 -0.446287 -0.000007 C -0.890356 -0.018125 0.000000 C -1.570440 -0.606553 1.258193 H -1.122447 -0.201115 2.172545 H -1.468350 -1.698184 1.290321 H -2.641895 -0.370174 1.268225 C -1.059079 1.510061 0.000009 H -0.602463 1.964061 0.887037 H -0.602467 1.964072 -0.887015 H -2.122973 1.774720 0.000014 H 0.710546 -1.530497 -0.000018 C -1.570447 -0.606536 -1.258197…	87.6323 157.9736 193.9913 211.9322 235.1478 282.1050 299.0905 332.5393 343.8756 346.7714 435.3022 453.4814 537.3265 763.2523 813.9221 903.5715 935.6206 949.1924 971.7294 997.2192 1021.7663 1050.6462 1057.5003 1078.9709 1127.8242 1236.6449 1237.8813 1306.4139 1345.1507 1357.9065 1422.4859 1424.9508 1442.1505 1454.4964 1510.3158 1510.4554 1516.7923 1519.8903 1523.2437 1533.5717 1533.5798 1549.2372 …	0	0	0	2	0	4	0	0	0	0	0	0	0	0	0	0	1	0	0	0	0	0	0	0	0	0	0	0	0	0	0	0	0	0	0
267	[CH3]/C=[CH]/C([CH3])([CH3])[CH3]	C7H13	20	-274.489	-274.309	-274.299	-274.442	-274.266	-274.256	33.1335	2	1 2 2.0 17 1.0 2 3 1.0 12 1.0 3 4 1.0 8 1.0 13 1.0 4 5 1.0 6 1.0 7 1.0 5 6 7 8 9 1.0 10 1.0 11 1.0 9 10 11 12 13 14 1.0 15 1.0 16 1.0 14 15 16 17 18 1.0 19 1.0 20 1.0 18 19 20	C 1.665416 0.147062 0.000001 C 0.547503 -0.544734 -0.000005 C -0.877079 -0.001346 0.000000 C -1.602446 -0.525767 1.258919 H -1.117525 -0.161120 2.171503 H -1.599330 -1.622290 1.291658 H -2.648126 -0.193502 1.271164 C -0.885590 1.535909 0.000015 H -0.375700 1.932404 0.884942 H -0.375700 1.932421 -0.884903 H -1.914668 1.915174 0.000019 H 0.613216 -1.644860 -0.000017 C -1.602447 -0.525742 -1.258929 …	69.9693 141.4704 144.8366 219.4011 236.0928 275.3764 279.6142 315.4933 328.8485 336.4087 404.4567 431.0530 526.2692 750.7076 800.9493 886.0962 937.2401 947.7072 972.7916 1001.4586 1035.2937 1053.2997 1065.9177 1080.1736 1221.2817 1239.7698 1292.0997 1318.2021 1422.1545 1424.0767 1426.9949 1453.5809 1488.2568 1506.5313 1508.4699 1515.6175 1516.4433 1530.4263 1532.6141 1545.9930 1777.9057 2980.4637…	0	0	1	1	0	4	0	0	0	0	0	0	0	0	0	0	1	0	0	0	0	0	0	0	0	0	0	0	0	0	0	0	0	0	0
268	[CH3]/[CH]=[CH]/C([CH3])([CH2])[CH3]	C7H13	20	-274.494	-274.315	-274.305	-274.448	-274.274	-274.263	28.6193	2	1 2 2.0 16 1.0 17 1.0 2 3 1.0 11 1.0 3 4 1.0 8 1.0 12 1.0 4 5 1.0 6 1.0 7 1.0 5 6 7 8 9 1.0 10 1.0 9 10 11 12 13 1.0 14 1.0 15 1.0 13 14 15 16 17 18 1.0 19 1.0 20 1.0 18 19 20	C 1.634287 0.329033 0.000003 C 0.538953 -0.433909 -0.000004 C -0.917315 0.032656 0.000001 C -1.605683 -0.545140 1.262436 H -1.149670 -0.142105 2.173662 H -1.512515 -1.637398 1.294962 H -2.672921 -0.294549 1.271529 C -1.043264 1.528406 0.000015 H -1.024002 2.089620 0.929727 H -1.024002 2.089637 -0.929687 H 0.656986 -1.521265 -0.000015 C -1.605684 -0.545117 -1.262445 H -1.149672 -0.142064 -2.173664…	53.4824 107.4310 164.6252 182.3952 211.5590 248.6280 280.9595 320.3968 327.8062 350.4211 433.5014 448.3275 457.5044 580.1321 788.5738 811.9065 897.0188 913.0640 963.2680 983.7461 990.5957 1018.7169 1051.3300 1079.4412 1120.1931 1208.3896 1221.9977 1265.9108 1332.6326 1350.1727 1419.0028 1436.2378 1441.7350 1486.5192 1510.0288 1515.1871 1517.3997 1522.2837 1530.1083 1538.5449 1748.7790 3028.1423 3…	0	0	0	2	1	3	0	0	0	0	0	0	0	0	0	0	1	0	0	0	0	0	0	0	0	0	0	0	0	0	0	0	0	0	0
269	[CH2]=[CH][CH]C([CH3])([CH3])[CH3] or [CH2]/[CH]=[CH]/C([CH3])([CH3])[CH3]	C7H13	20	-274.52	-274.34	-274.33	-274.471	-274.295	-274.285	14.9208	2	1 2 1.5 17 1.0 18 1.5 2 3 1.0 12 1.0 3 4 1.0 8 1.0 13 1.0 4 5 1.0 6 1.0 7 1.0 5 6 7 8 9 1.0 10 1.0 11 1.0 9 10 11 12 13 14 1.0 15 1.0 16 1.0 14 15 16 17 18 19 1.0 20 1.0 19 20	C -1.762551 0.298800 0.000004 C -0.615086 -0.481568 0.000007 C 0.824268 -0.016277 0.000000 C 1.523959 -0.586970 -1.258396 H 1.068352 -0.193645 -2.174100 H 1.451381 -1.680707 -1.289801 H 2.588539 -0.320756 -1.263997 C 0.955224 1.516690 -0.000033 H 0.489364 1.960735 -0.887318 H 0.489376 1.960774 0.887239 H 2.012606 1.805577 -0.000045 H -0.747094 -1.565665 0.000015 C 1.523960 -0.586916 1.258421 H 1.…	71.3115 152.4009 198.5868 235.4051 283.5780 301.5809 331.5899 338.3198 348.9290 432.6805 434.8064 538.2523 549.6120 754.3742 759.6439 805.7455 899.2136 930.3177 947.9419 971.7571 1004.2457 1027.0220 1049.2333 1066.5371 1209.7272 1226.1914 1230.7448 1295.8591 1312.7572 1356.1737 1420.8692 1425.0118 1453.7058 1510.0611 1515.8646 1516.7034 1519.3931 1533.2672 1534.1598 1542.4220 1550.3356 3035.4973 …	1	0	0	0	0	3	1	1	0	0	0	0	0	0	0	0	1	0	0	0	0	0	0.00743626	0.00247875	0.0497871	0	0	0	0	0	0	0	0	0.0497871	0
270	[CH3]/[CH]=C/C([CH3])([CH3])[CH3]	C7H13	20	-274.488	-274.308	-274.297	-274.44	-274.264	-274.254	34.3068	2	1 2 2.0 16 1.0 17 1.0 2 3 1.0 3 4 1.0 8 1.0 12 1.0 4 5 1.0 6 1.0 7 1.0 5 6 7 8 9 1.0 10 1.0 11 1.0 9 10 11 12 13 1.0 14 1.0 15 1.0 13 14 15 16 17 18 1.0 19 1.0 20 1.0 18 19 20	C -1.721842 0.367126 -0.000003 C -0.576525 -0.281693 0.000003 C 0.892488 -0.042927 0.000000 C 1.514764 -0.684742 -1.262154 H 1.098260 -0.241476 -2.173201 H 1.318885 -1.762108 -1.290450 H 2.601251 -0.533929 -1.271444 C 1.179184 1.479562 -0.000013 H 0.754027 1.960272 -0.887853 H 0.754028 1.960288 0.887818 H 2.261239 1.659703 -0.000015 C 1.514765 -0.684719 1.262165 H 1.098262 -0.241438 2.173205 H 1.…	80.5778 121.8077 137.6557 195.6892 222.9411 274.9373 276.7417 310.0138 333.2090 346.6328 415.0054 491.9853 531.9967 738.3162 758.2467 862.2119 932.0714 938.5364 974.0535 1004.2084 1043.1680 1056.3341 1070.6202 1106.1055 1228.0407 1233.8937 1256.8747 1321.2552 1414.9886 1421.1361 1431.4568 1449.6236 1506.2641 1514.2625 1517.1424 1517.3290 1518.9560 1527.8484 1529.2330 1546.8551 1774.1092 3023.9433…	0	0	1	1	0	4	0	0	0	0	0	0	0	0	0	0	1	0	0	0	0	0	0	0	0	0	0	0	0	0	0	0	0	0	0
271	C=CC(CC)CC	C7H14	21	-275.162	-274.968	-274.957	-275.113	-274.923	-274.913	-16.7583	1	1 2 2.0 11 1.0 12 1.0 2 3 1.0 10 1.0 3 4 1.0 7 1.0 13 1.0 4 5 1.0 6 1.0 14 1.0 5 6 7 8 1.0 9 1.0 18 1.0 8 9 10 11 12 13 14 15 1.0 16 1.0 17 1.0 15 16 17 18 19 1.0 20 1.0 21 1.0 19 20 21	C -0.000003 2.290391 -0.113445 C 0.000000 1.109877 0.507826 C 0.000000 -0.244533 -0.156669 C 1.270892 -1.045416 0.214165 H 1.175173 -2.058137 -0.200959 H 1.308498 -1.167212 1.306758 C -1.270891 -1.045417 0.214166 H -1.175171 -2.058138 -0.200958 H -1.308496 -1.167213 1.306758 H 0.000000 1.088765 1.601064 H -0.000004 2.364741 -1.199232 H -0.000003 3.228301 0.436173 H 0.000000 -0.092969 -1.247306 C …	87.1760 89.4208 107.3493 185.0255 210.8367 239.0230 283.6130 331.6629 383.8193 422.3604 488.5292 688.7412 768.9236 787.0763 861.9464 937.9975 939.9234 945.5730 1034.8241 1035.8688 1041.1143 1061.2126 1062.7821 1118.8293 1175.1028 1219.7101 1289.5171 1299.1729 1321.5093 1336.7601 1380.9756 1389.9813 1391.7654 1438.8586 1442.9846 1480.0774 1512.0786 1522.3180 1527.7998 1527.9549 1536.9463 1538.6360…	0	0	0	1	0	2	0	0	0	1	0	0	0	2	0	1	0	0	0	0	0	0	0	0	0	0	0	0	0	0	0	0	0	0	0
272	[CH]=[CH][CH]([CH2][CH3])[CH2][CH3]	C7H13	20	-274.475	-274.295	-274.285	-274.429	-274.253	-274.242	41.4965	2	1 2 2.0 11 1.0 2 3 1.0 10 1.0 3 4 1.0 7 1.0 12 1.0 4 5 1.0 6 1.0 13 1.0 5 6 7 8 1.0 9 1.0 17 1.0 8 9 10 11 12 13 14 1.0 15 1.0 16 1.0 14 15 16 17 18 1.0 19 1.0 20 1.0 18 19 20	C 0.000000 2.315138 -0.197321 C 0.000000 1.171605 0.447991 C 0.000000 -0.215269 -0.169311 C 1.272812 -0.993995 0.234495 H 1.178220 -2.023791 -0.136558 H 1.312638 -1.068180 1.331362 C -1.272812 -0.993995 0.234496 H -1.178220 -2.023791 -0.136558 H -1.312638 -1.068180 1.331362 H 0.000000 1.182390 1.549452 H 0.000000 3.369336 0.051494 H 0.000000 -0.099312 -1.262211 C 2.576426 -0.383735 -0.288875 H 3.…	86.9467 87.8214 106.2127 185.4096 208.2952 240.3817 292.8719 329.2254 383.4885 434.5052 481.6372 675.8097 739.3654 782.3508 825.0327 834.9269 896.7463 940.6399 981.1535 1036.0184 1060.6049 1061.4296 1118.0807 1169.5457 1175.4083 1253.2948 1290.1420 1316.5662 1322.7025 1385.1544 1390.3266 1392.9920 1439.1353 1443.5733 1511.3643 1520.5787 1527.3958 1527.5534 1536.2839 1537.7398 1688.1755 3006.6334 …	0	0	0	1	0	2	0	0	1	0	0	0	0	2	0	1	0	0	0	0	0	0	0	0	0	0	0	0	0	0	0	0	0	0	0
273	[CH2]=[CH][C@@H]([CH2][CH3])[CH2][CH2]	C7H13	20	-274.49	-274.31	-274.3	-274.443	-274.268	-274.258	31.9061	2	1 2 2.0 11 1.0 12 1.0 2 3 1.0 10 1.0 3 4 1.0 7 1.0 13 1.0 4 5 1.0 6 1.0 14 1.0 5 6 7 8 1.0 9 1.0 18 1.0 8 9 10 11 12 13 14 15 1.0 16 1.0 17 1.0 15 16 17 18 19 1.0 20 1.0 19 20	C -0.095061 2.283636 -0.113847 C -0.080135 1.098778 0.499413 C -0.040957 -0.247800 -0.177826 C 1.235385 -1.031966 0.206778 H 1.163824 -2.041888 -0.219958 H 1.256879 -1.163885 1.298652 C -1.305581 -1.077091 0.171025 H -1.196943 -2.086276 -0.253155 H -1.318600 -1.231168 1.268547 H -0.098656 1.068435 1.592105 H -0.077774 2.365326 -1.198910 H -0.123908 3.217204 0.442300 H -0.032087 -0.088407 -1.26580…	89.5031 94.7468 122.1383 149.3340 190.3023 225.3471 278.8967 322.1922 387.7094 418.7555 470.0903 488.5650 691.1224 763.7419 791.6532 902.9991 939.4356 940.9570 978.6342 1035.3540 1039.8075 1046.9578 1082.6503 1106.5519 1132.9759 1186.5829 1238.9101 1296.5374 1315.7637 1335.9393 1365.8008 1384.3736 1390.4155 1441.1736 1477.9560 1483.9444 1494.5164 1518.4924 1527.8636 1537.6403 1726.4085 2922.7398 …	0	0	0	1	1	1	0	0	0	1	0	0	0	2	0	1	0	0	0	0	0	0	0	0	0	0	0	0	0	0	0	0	0	0	0
274	[CH2]=C[CH]([CH2][CH3])[CH2][CH3]	C7H13	20	-274.484	-274.303	-274.293	-274.435	-274.259	-274.248	37.809	2	1 2 2.0 10 1.0 11 1.0 2 3 1.0 3 4 1.0 7 1.0 12 1.0 4 5 1.0 6 1.0 13 1.0 5 6 7 8 1.0 9 1.0 17 1.0 8 9 10 11 12 13 14 1.0 15 1.0 16 1.0 14 15 16 17 18 1.0 19 1.0 20 1.0 18 19 20	C 0.000000 2.375270 -0.030489 C 0.000000 1.114825 -0.401238 C 0.000000 -0.255141 0.157262 C -1.276472 -1.033745 -0.246761 H -1.184938 -2.056652 0.142090 H -1.304519 -1.117536 -1.341378 C 1.276472 -1.033745 -0.246761 H 1.184938 -2.056652 0.142090 H 1.304519 -1.117536 -1.341378 H 0.000000 2.668405 1.026690 H 0.000000 3.196870 -0.746471 H 0.000000 -0.161984 1.262163 C -2.578078 -0.406747 0.259342 H …	86.6212 87.5884 107.2628 180.3506 205.4995 245.7407 269.1054 291.9478 380.8208 405.3390 468.7340 600.3854 745.3340 786.2353 849.8337 882.3068 934.2618 935.9595 997.3458 1033.0045 1060.0910 1061.0282 1117.1359 1164.2563 1176.1214 1278.8392 1285.5901 1315.3704 1367.5855 1380.2663 1389.2334 1438.9219 1442.4492 1449.1619 1511.1136 1520.2767 1527.8148 1528.1164 1536.8354 1538.0933 1753.1066 2915.6540 …	0	0	1	0	0	2	0	0	0	1	0	0	0	2	0	1	0	0	0	0	0	0	0	0	0	0	0	0	0	0	0	0	0	0	0
275	[CH2]=[CH][C@@H]([CH2][CH3])[CH][CH3]	C7H13	20	-274.496	-274.317	-274.306	-274.448	-274.273	-274.262	29.2898	2	1 2 2.0 10 1.0 11 1.0 2 3 1.0 9 1.0 3 4 1.0 7 1.0 12 1.0 4 5 1.0 6 1.0 13 1.0 5 6 7 8 1.0 17 1.0 8 9 10 11 12 13 14 1.0 15 1.0 16 1.0 14 15 16 17 18 1.0 19 1.0 20 1.0 18 19 20	C 0.114459 2.302629 0.123638 C -0.029544 1.140603 -0.517268 C 0.007521 -0.234328 0.126030 C -1.255194 -1.058712 -0.215749 H -1.120565 -2.073627 0.180541 H -1.322037 -1.164010 -1.308635 C 1.263462 -0.943902 -0.306100 H 1.240652 -1.472390 -1.258454 H -0.149876 1.139548 -1.602677 H 0.238947 2.348193 1.203894 H 0.110675 3.252828 -0.404377 H 0.045329 -0.089269 1.217475 C -2.555643 -0.458131 0.325781 H…	59.2434 80.5479 96.2711 117.0271 180.7538 216.9380 269.6180 304.7106 382.0181 411.9495 457.4525 500.3664 688.9130 776.8763 864.0146 929.2924 935.0909 948.2992 1009.0770 1029.9494 1034.4673 1055.6661 1080.8021 1139.4351 1171.2398 1192.8604 1283.4272 1291.5752 1331.1790 1344.0905 1385.0991 1411.1429 1436.2145 1441.2697 1470.2994 1503.4553 1516.1847 1518.3698 1527.4937 1536.9577 1712.0676 2975.0438 …	0	0	0	1	0	2	0	0	0	1	0	0	1	1	0	1	0	0	0	0	0	0	0	0	0	0	0	0	0	0	0	0	0	0	0
276	CC=C(CC)CC	C7H14	21	-275.168	-274.973	-274.963	-275.116	-274.926	-274.916	-18.5663	1	1 2 2.0 7 1.0 11 1.0 2 3 1.0 15 1.0 3 4 1.0 8 1.0 9 1.0 4 5 1.0 6 1.0 10 1.0 5 6 7 8 9 10 11 12 1.0 13 1.0 14 1.0 12 13 14 15 16 1.0 17 1.0 18 1.0 16 17 18 19 1.0 20 1.0 21 1.0 19 20 21	C -0.806851 -1.201844 -0.287087 C 0.051690 -0.187617 -0.097097 C 1.465573 -0.271611 -0.644019 C 2.523296 -0.571824 0.434030 H 2.329872 -1.541248 0.906667 H 2.526146 0.188257 1.223777 H -0.446974 -2.062079 -0.855193 H 1.727196 0.674177 -1.140885 H 1.514905 -1.048996 -1.416268 H 3.528813 -0.599203 -0.002019 C -2.231001 -1.317856 0.181089 H -2.561587 -0.457096 0.768960 H -2.916072 -1.418177 -0.67234…	57.1877 75.6686 128.4118 174.0013 211.2494 224.7228 256.2161 308.6558 330.5271 410.5940 518.1960 645.8166 731.3128 796.4041 805.6742 861.3722 935.1379 955.8764 1018.9839 1053.4036 1073.6660 1083.7645 1096.8131 1113.6268 1158.6372 1235.6673 1299.1507 1310.8285 1357.9020 1373.3645 1410.9499 1433.2357 1436.9547 1444.3207 1510.0673 1514.0275 1516.8536 1526.9699 1528.1319 1530.4955 1538.0290 1544.8443…	0	0	0	1	0	3	0	0	0	0	0	1	0	2	0	0	0	0	0	0	0	0	0	0	0	0	0	0	0	0	0	0	0	0	0
277	[CH3]/[CH]=C(\[CH2][CH3])/[CH][CH3] or [CH3]/[CH]=C(/[CH2][CH3])\[CH][CH3]	C7H13	20	-274.526	-274.345	-274.335	-274.472	-274.296	-274.286	14.437	2	1 2 1.5 7 1.0 11 1.0 2 3 1.0 15 1.5 3 4 1.0 8 1.0 9 1.0 4 5 1.0 6 1.0 10 1.0 5 6 7 8 9 10 11 12 1.0 13 1.0 14 1.0 12 13 14 15 16 1.0 17 1.0 16 17 18 1.0 19 1.0 20 1.0 18 19 20	C -1.427391 -0.731226 -0.171347 C -0.178843 -0.103433 -0.247682 C 1.017690 -0.966497 -0.630659 C 1.821379 -1.461206 0.583810 H 1.185586 -2.047167 1.257192 H 2.228989 -0.623840 1.161199 H -1.475299 -1.788203 -0.425007 H 1.683696 -0.417611 -1.307489 H 0.661572 -1.834288 -1.198940 H 2.659394 -2.095059 0.270225 C -2.713255 -0.068025 0.229714 H -2.655747 0.374350 1.234939 H -2.988843 0.748271 -0.45442…	61.5429 66.7005 105.0142 144.3516 203.9615 218.0647 221.6562 289.2150 343.2617 457.0529 542.7979 591.2116 678.2295 746.8748 759.4709 799.7560 949.0025 968.3680 1029.3881 1034.3871 1043.7105 1086.4884 1099.3519 1132.6143 1162.1326 1270.5839 1298.3424 1339.4368 1374.1066 1432.6439 1435.2225 1438.3218 1473.5897 1506.3130 1508.1287 1512.1044 1519.9088 1526.8790 1530.8058 1541.8420 1551.8540 3011.6072…	2	1	0	0	0	3	0	0	0	0	0	0	0	1	0	0	0	0.00247875	0.0995741	0	0	0	0.100068	0	0	0	0	0	0	0	0.0049575	0	0	0	0
278	[CH2]=[CH]C([CH2][CH3])[CH2][CH3] or [CH2][CH]=C([CH2][CH3])[CH2][CH3]	C7H13	20	-274.524	-274.343	-274.333	-274.471	-274.294	-274.284	15.2232	2	1 2 1.5 7 1.0 11 1.5 2 3 1.0 14 1.0 3 4 1.0 8 1.0 9 1.0 4 5 1.0 6 1.0 10 1.0 5 6 7 8 9 10 11 12 1.0 13 1.0 12 13 14 15 1.0 16 1.0 17 1.0 15 16 17 18 1.0 19 1.0 20 1.0 18 19 20	C -0.647552 -1.363037 -0.250010 C 0.072605 -0.174827 -0.085296 C 1.468420 -0.048310 -0.643784 C 2.571569 -0.199430 0.425065 H 2.531677 -1.191540 0.887976 H 2.462151 0.545011 1.221946 H -0.142820 -2.153945 -0.808031 H 1.585902 0.932810 -1.128291 H 1.627706 -0.801794 -1.425536 H 3.565007 -0.069058 -0.019939 C -1.921898 -1.645578 0.206483 H -2.511465 -0.930301 0.771449 H -2.379910 -2.610077 0.013744…	62.1717 69.1097 154.0624 210.3411 223.0538 232.0578 291.4157 318.9403 405.6625 481.7808 535.4847 651.3554 727.5384 767.4386 794.7714 806.6548 935.0757 971.1256 977.8485 1030.0478 1053.6489 1069.0134 1094.4556 1112.3164 1229.4298 1254.9461 1284.3269 1309.2164 1351.5713 1365.1050 1408.6759 1431.0413 1434.9558 1490.1567 1509.6935 1521.9323 1526.3759 1527.9143 1536.7980 1539.8273 1550.7121 3014.7925 …	0	0	0	0	0	2	1	1	0	0	1	0	0	2	0	0	0	0	0	0	0	0	0	0	0	0	0	0	0	0	0	0	0	0	0
279	[CH3]C=C([CH2][CH3])[CH2][CH3]	C7H13	20	-274.489	-274.308	-274.297	-274.438	-274.261	-274.25	36.5312	2	1 2 2.0 10 1.0 2 3 1.0 14 1.0 3 4 1.0 7 1.0 8 1.0 4 5 1.0 6 1.0 9 1.0 5 6 7 8 9 10 11 1.0 12 1.0 13 1.0 11 12 13 14 15 1.0 16 1.0 17 1.0 15 16 17 18 1.0 19 1.0 20 1.0 18 19 20	C -1.048045 -1.011278 -0.261762 C -0.024306 -0.193182 -0.102786 C 1.349411 -0.534947 -0.667162 C 2.349553 -0.997607 0.406625 H 1.987915 -1.903003 0.906380 H 2.506451 -0.232012 1.175218 H 1.762292 0.340764 -1.188024 H 1.239821 -1.323351 -1.419629 H 3.325337 -1.221144 -0.040595 C -2.473824 -1.157581 0.080524 H -2.830655 -0.331309 0.719225 H -3.104688 -1.171236 -0.818057 H -2.663117 -2.093658 0.6223…	39.8635 75.3137 122.7976 170.1879 183.2845 208.7886 259.5521 274.2668 305.1623 386.2889 491.2696 622.7487 701.7161 790.1053 799.9807 931.4309 956.7294 1020.1112 1047.7168 1049.6899 1055.9420 1076.2371 1106.6614 1173.8729 1200.2519 1305.1945 1309.9917 1356.0620 1367.9544 1424.9861 1433.0451 1436.0761 1489.8148 1502.8135 1510.8275 1516.7088 1527.4562 1528.6607 1537.0188 1537.5660 1778.4284 2980.165…	0	0	1	0	0	3	0	0	0	0	0	1	0	2	0	0	0	0	0	0	0	0	0	0	0	0	0	0	0	0	0	0	0	0	0
280	[CH3]/[CH]=C(/[CH2][CH2])\[CH2][CH3]	C7H13	20	-274.496	-274.317	-274.306	-274.447	-274.272	-274.261	29.809	2	1 2 2.0 6 1.0 10 1.0 2 3 1.0 14 1.0 3 4 1.0 7 1.0 8 1.0 4 5 1.0 9 1.0 5 6 7 8 9 10 11 1.0 12 1.0 13 1.0 11 12 13 14 15 1.0 16 1.0 17 1.0 15 16 17 18 1.0 19 1.0 20 1.0 18 19 20	C -0.977229 -1.094477 -0.273424 C 0.040549 -0.241102 -0.082417 C 1.429413 -0.577668 -0.607906 C 2.427838 -0.849029 0.474553 H 2.141723 -1.429183 1.346953 H -0.763418 -2.015408 -0.819416 H 1.801272 0.240963 -1.242399 H 1.350935 -1.452973 -1.277624 H 3.480333 -0.618409 0.340787 C -2.407748 -0.951062 0.166402 H -2.594283 -0.033258 0.730641 H -3.083471 -0.949937 -0.700170 H -2.711390 -1.799548 0.7949…	52.4826 79.0921 129.7195 142.7106 180.7701 220.3797 249.2260 298.3361 328.6648 407.8840 474.5488 522.1992 644.6076 728.2245 800.6383 840.6018 862.1552 959.4423 980.4912 1039.6163 1060.7969 1074.8449 1096.7936 1109.1317 1131.9565 1212.0574 1239.1736 1310.8089 1357.6243 1360.2531 1410.1271 1435.4792 1443.6681 1482.4492 1492.1456 1512.3001 1514.1558 1528.5872 1529.7336 1541.7860 1747.2733 2958.6442 …	0	0	0	1	1	2	0	0	0	0	0	1	0	2	0	0	0	0	0	0	0	0	0	0	0	0	0	0	0	0	0	0	0	0	0
281	CCCC(=C)CC	C7H14	21	-275.166	-274.971	-274.961	-275.114	-274.924	-274.914	-17.3932	1	1 2 2.0 7 1.0 17 1.0 2 3 1.0 10 1.0 3 4 1.0 8 1.0 9 1.0 4 5 1.0 6 1.0 18 1.0 5 6 7 8 9 10 11 1.0 12 1.0 13 1.0 11 12 13 14 1.0 15 1.0 16 1.0 14 15 16 17 18 19 1.0 20 1.0 21 1.0 19 20 21	C 1.147907 1.914641 -0.075154 C 0.725446 0.647339 -0.005100 C -0.621803 0.237349 -0.567011 C -1.680585 -0.066356 0.512943 H -1.802719 0.821111 1.147610 H -1.321771 -0.868017 1.171846 H 0.555968 2.690744 -0.555363 H -0.510198 -0.651812 -1.205014 H -1.001259 1.036247 -1.216896 C 1.577805 -0.428446 0.640802 H 0.982277 -0.986119 1.377362 H 2.393098 0.046478 1.199550 C 2.176258 -1.426697 -0.367398 H 2…	24.6065 78.0946 108.3245 177.2651 229.6819 245.6405 264.2340 326.4423 422.6060 459.0334 619.7384 727.6471 753.2533 796.8019 807.3545 894.3836 904.4218 926.0943 963.7425 1023.1922 1050.5507 1066.2918 1099.8146 1126.9306 1144.8356 1265.0187 1288.1793 1318.4596 1331.8449 1345.7559 1371.9877 1400.8798 1435.4557 1440.0147 1475.7111 1511.5127 1519.4684 1523.3806 1529.1919 1530.8253 1539.2767 1540.7240 …	0	0	0	0	0	2	0	0	0	1	0	1	0	3	0	0	0	0	0	0	0	0	0	0	0	0	0	0	0	0	0	0	0	0	0
282	[CH2][CH2][CH2]C(=[CH2])[CH2][CH3]	C7H13	20	-274.493	-274.313	-274.303	-274.444	-274.269	-274.258	31.5547	2	1 2 2.0 7 1.0 17 1.0 2 3 1.0 10 1.0 3 4 1.0 8 1.0 9 1.0 4 5 1.0 6 1.0 18 1.0 5 6 7 8 9 10 11 1.0 12 1.0 13 1.0 11 12 13 14 1.0 15 1.0 16 1.0 14 15 16 17 18 19 1.0 20 1.0 19 20	C 1.067105 1.914910 -0.097754 C 0.656422 0.644398 -0.015896 C -0.679437 0.215771 -0.589550 C -1.753910 -0.065629 0.489256 H -1.899719 0.837626 1.097133 H -1.363090 -0.826616 1.190568 H 0.473469 2.678336 -0.595721 H -0.557923 -0.691478 -1.198864 H -1.056819 0.993662 -1.263111 C 1.510377 -0.415375 0.653675 H 0.908303 -0.976800 1.382257 H 2.308238 0.073869 1.225082 C 2.141020 -1.411608 -0.336786 H 2…	28.6164 79.8557 107.0717 117.4094 180.1307 231.3640 263.1765 329.0722 420.2709 446.8088 472.2977 621.9089 723.3878 748.4749 802.2376 810.8088 885.7335 927.5764 963.1550 995.5423 1025.3301 1071.6790 1085.0776 1111.4152 1125.7749 1193.1377 1278.7462 1304.6715 1323.6477 1334.9020 1371.6483 1389.7495 1435.6699 1474.8827 1485.8803 1499.4964 1516.6904 1521.3107 1532.2784 1539.0726 1728.2686 2945.6016 3…	0	0	0	0	1	1	0	0	0	1	0	1	0	3	0	0	0	0	0	0	0	0	0	0	0	0	0	0	0	0	0	0	0	0	0
283	[CH3][CH2][CH2]C(=[CH2])[CH2][CH2]	C7H13	20	-274.494	-274.314	-274.303	-274.445	-274.27	-274.259	30.8544	2	1 2 2.0 7 1.0 16 1.0 2 3 1.0 10 1.0 3 4 1.0 8 1.0 9 1.0 4 5 1.0 6 1.0 17 1.0 5 6 7 8 9 10 11 1.0 12 1.0 13 1.0 11 12 13 14 1.0 15 1.0 14 15 16 17 18 1.0 19 1.0 20 1.0 18 19 20	C 1.298937 1.854668 -0.049665 C 0.808006 0.611803 -0.008308 C -0.560371 0.275679 -0.564091 C -1.611256 -0.057848 0.514184 H -1.693074 0.791267 1.205566 H -1.270897 -0.912165 1.113995 H 0.739699 2.675739 -0.492539 H -0.473785 -0.584063 -1.244964 H -0.925827 1.118539 -1.164613 C 1.609986 -0.532295 0.593644 H 1.040868 -1.006300 1.406367 H 2.510854 -0.110497 1.074131 C 2.001235 -1.575625 -0.406266 H …	40.2401 77.8017 112.3426 142.8263 183.8606 243.2678 255.2326 321.9620 418.0946 456.0356 481.7820 618.9244 728.6760 753.5114 790.0622 858.1808 900.6205 909.3641 928.1340 981.5793 1046.7012 1058.7362 1093.1683 1116.2728 1126.3439 1208.2027 1269.5718 1308.4252 1327.3080 1343.7985 1361.1707 1401.1936 1439.9552 1471.8859 1483.1009 1495.9522 1511.7902 1523.2795 1529.1298 1539.3402 1729.1537 2961.6900 3…	0	0	0	0	1	1	0	0	0	1	0	1	0	3	0	0	0	0	0	0	0	0	0	0	0	0	0	0	0	0	0	0	0	0	0
284	[CH3][CH][CH2]C(=[CH2])[CH2][CH3]	C7H13	20	-274.5	-274.32	-274.31	-274.45	-274.275	-274.264	27.8134	2	1 2 2.0 6 1.0 16 1.0 2 3 1.0 9 1.0 3 4 1.0 7 1.0 8 1.0 4 5 1.0 17 1.0 5 6 7 8 9 10 1.0 11 1.0 12 1.0 10 11 12 13 1.0 14 1.0 15 1.0 13 14 15 16 17 18 1.0 19 1.0 20 1.0 18 19 20	C 1.409479 1.833356 -0.027645 C 0.777495 0.655703 0.004104 C -0.607717 0.486687 -0.596536 C -1.667171 0.165953 0.417202 H -1.605529 0.664212 1.383131 H 0.967170 2.709751 -0.496099 H -0.594429 -0.306587 -1.360843 H -0.869098 1.410638 -1.144871 C 1.401155 -0.565541 0.648816 H 0.691378 -0.991692 1.371935 H 2.288171 -0.260995 1.217090 C 1.799066 -1.661699 -0.356239 H 2.259243 -2.511073 0.161328 H 0.9…	37.2487 56.3358 98.1113 119.6891 188.3446 241.5746 257.4110 332.7844 418.9754 457.7774 461.4179 609.9053 727.5175 791.8219 806.5142 904.1011 910.5881 928.6653 962.5884 1009.1603 1025.6764 1082.8452 1108.5292 1126.3487 1148.9276 1206.1839 1287.9917 1310.3006 1331.0565 1372.1770 1413.3810 1434.6153 1437.9259 1472.2891 1496.7037 1504.2819 1512.1055 1516.4015 1530.4147 1537.8126 1730.5697 2948.6397 2…	0	0	0	0	0	2	0	0	0	1	0	1	1	2	0	0	0	0	0	0	0	0	0	0	0	0	0	0	0	0	0	0	0	0	0
285	[CH3][CH2][CH2]C(=[CH])[CH2][CH3]	C7H13	20	-274.478	-274.297	-274.287	-274.43	-274.252	-274.242	41.6301	2	1 2 2.0 16 1.0 2 3 1.0 9 1.0 3 4 1.0 7 1.0 8 1.0 4 5 1.0 6 1.0 17 1.0 5 6 7 8 9 10 1.0 11 1.0 12 1.0 10 11 12 13 1.0 14 1.0 15 1.0 13 14 15 16 17 18 1.0 19 1.0 20 1.0 18 19 20	C 1.101224 1.944846 -0.155301 C 0.715182 0.689986 -0.042550 C -0.623033 0.216743 -0.592214 C -1.693041 0.011075 0.498072 H -1.842041 0.960982 1.027272 H -1.330145 -0.705128 1.247369 H -0.485253 -0.727636 -1.138661 H -0.992318 0.948730 -1.319558 C 1.600629 -0.344943 0.655023 H 0.993415 -0.912988 1.373760 H 2.371892 0.169669 1.239233 C 2.274111 -1.321275 -0.323801 H 2.890677 -2.047557 0.218568 H 1.…	33.5771 78.4511 105.9896 175.6637 226.4710 245.9295 266.0775 317.9707 397.4331 426.1203 609.0697 691.1506 748.6400 783.5449 798.5500 866.7289 891.7643 914.6902 991.7258 1042.0541 1059.8105 1081.1635 1123.8335 1146.0919 1208.6083 1277.1357 1302.1232 1321.2830 1340.3740 1357.5062 1399.2561 1435.3663 1439.8678 1508.6824 1514.8753 1522.8369 1528.9065 1529.0661 1536.1128 1539.9973 1694.0326 3026.7462 …	0	0	0	0	0	2	0	0	1	0	0	1	0	3	0	0	0	0	0	0	0	0	0	0	0	0	0	0	0	0	0	0	0	0	0
286	[CH3][CH2]/[CH]=C(/[CH2])\[CH2][CH3] or [CH3][CH2][CH]C(=[CH2])[CH2][CH3]	C7H13	20	-274.522	-274.341	-274.331	-274.469	-274.292	-274.282	16.8961	2	1 2 1.5 7 1.0 16 1.0 2 3 1.5 9 1.0 3 4 1.0 8 1.0 4 5 1.0 6 1.0 17 1.0 5 6 7 8 9 10 1.0 11 1.0 12 1.0 10 11 12 13 1.0 14 1.0 15 1.0 13 14 15 16 17 18 1.0 19 1.0 20 1.0 18 19 20	C 1.706008 1.620032 -0.369157 C 0.820368 0.667086 0.118665 C -0.554625 0.922230 0.130647 C -1.655578 0.024219 0.609908 H -2.171258 0.503416 1.458343 H -1.256505 -0.921286 0.992430 H 1.353668 2.570426 -0.760508 H -0.877464 1.889961 -0.256472 C 1.385827 -0.660356 0.608464 H 0.860441 -0.987673 1.513644 H 2.431623 -0.512050 0.902416 C 1.317368 -1.772199 -0.452263 H 1.754650 -2.703452 -0.073482 H 0.28…	40.5706 86.1618 131.0636 198.8187 232.6862 239.4435 308.0036 364.1579 441.9271 515.4727 558.7434 604.8371 735.2391 762.9234 796.9592 803.7181 816.4339 906.6273 989.7406 1014.1128 1054.3249 1074.9081 1095.1183 1105.2024 1174.2975 1267.4203 1295.5774 1328.8001 1354.3445 1364.4312 1411.1638 1433.3032 1438.6878 1491.6223 1509.2556 1523.7499 1526.2925 1528.4836 1536.2557 1541.6418 1543.6313 2994.0182 …	1	1	0	0	0	2	1	0	0	0	0	0	0	2	0	0	0	0	0.0497871	0	0	0	0.00260216	0.00247875	0	0	0	0	0	0	0.0522658	0	0	0	0
287	[CH3][CH2][CH2]/C(=[CH]\[CH3])/[CH2] or [CH3][CH2][CH2]C(=[CH2])[CH][CH3]	C7H13	20	-274.522	-274.342	-274.332	-274.469	-274.293	-274.283	16.3406	2	1 2 1.5 7 1.0 16 1.0 2 3 1.0 10 1.5 3 4 1.0 8 1.0 9 1.0 4 5 1.0 6 1.0 17 1.0 5 6 7 8 9 10 11 1.0 12 1.0 11 12 13 1.0 14 1.0 15 1.0 13 14 15 16 17 18 1.0 19 1.0 20 1.0 18 19 20	C 1.214407 1.987126 0.105492 C 0.880516 0.656957 -0.118643 C -0.522482 0.337905 -0.616342 C -1.495041 -0.051977 0.513300 H -1.525263 0.761671 1.249914 H -1.102813 -0.928424 1.045902 H 0.514296 2.791513 -0.097924 H -0.492245 -0.469677 -1.359209 H -0.923261 1.214961 -1.140185 C 1.809471 -0.356048 0.137998 H 2.783696 -0.044065 0.514517 C 1.624841 -1.830451 -0.039907 H 1.704141 -2.361116 0.921356 H 0…	59.3467 88.0378 106.1107 184.3071 192.7563 242.0015 274.9745 356.0099 432.5974 525.7348 556.2726 592.5611 733.8164 753.7423 780.1561 821.5444 889.1965 903.4980 957.0978 1031.6646 1047.8528 1052.6246 1103.8069 1122.4409 1157.6997 1254.0369 1315.1648 1319.3827 1346.0719 1393.5673 1413.1129 1440.0851 1440.3464 1470.6858 1505.9092 1517.6594 1524.9712 1529.0983 1535.1987 1544.2043 1547.0127 3011.8124 …	1	1	0	0	0	2	1	0	0	0	0	0	0	2	0	0	0	0	0.0497871	0	0	0	0.0497932	0.00247875	0	0	0	0	0	0	0.00260216	0	0	0	0
288	C=C(C)C(C)(C)C	C7H14	21	-275.163	-274.969	-274.959	-275.118	-274.928	-274.918	-20.0342	1	1 2 2.0 7 1.0 11 1.0 2 3 1.0 8 1.0 3 4 1.0 14 1.0 18 1.0 4 5 1.0 6 1.0 13 1.0 5 6 7 8 9 1.0 10 1.0 12 1.0 9 10 11 12 13 14 15 1.0 16 1.0 17 1.0 15 16 17 18 19 1.0 20 1.0 21 1.0 19 20 21	C 1.482961 1.430083 -0.000001 C 0.931140 0.210600 0.000000 C -0.588462 -0.026690 0.000000 C -0.992729 -0.830455 1.259915 H -0.702980 -0.299512 2.174171 H -0.529208 -1.822240 1.282675 H 0.902546 2.345922 -0.000006 C 1.830746 -1.008809 -0.000001 H 1.664477 -1.642787 0.879708 H 2.884038 -0.712878 0.000023 H 2.563405 1.553674 0.000000 H 1.664509 -1.642757 -0.879738 H -2.079499 -0.975935 1.283279 C -1…	16.3857 172.6447 205.6150 266.2960 287.9702 294.8299 330.8104 349.4651 376.5657 394.6406 469.1963 491.1562 563.9611 677.6633 741.5699 850.3037 927.0958 936.4422 945.4119 964.9378 970.8698 1028.3465 1052.6970 1070.5888 1089.8906 1218.8404 1239.0846 1248.7660 1325.4689 1422.3513 1422.9761 1442.7106 1452.8274 1476.2335 1505.8335 1515.3363 1521.0186 1524.5974 1529.4367 1539.2694 1539.8815 1554.1369 1…	0	0	0	0	0	4	0	0	0	1	0	1	0	0	0	0	1	0	0	0	0	0	0	0	0	0	0	0	0	0	0	0	0	0	0
289	[CH2]=C([CH2])C([CH3])([CH3])[CH3]	C7H13	20	-274.514	-274.334	-274.324	-274.467	-274.291	-274.281	17.1974	2	1 2 1.5 7 1.0 10 1.0 2 3 1.0 8 1.5 3 4 1.0 13 1.0 17 1.0 4 5 1.0 6 1.0 12 1.0 5 6 7 8 9 1.0 11 1.0 9 10 11 12 13 14 1.0 15 1.0 16 1.0 14 15 16 17 18 1.0 19 1.0 20 1.0 18 19 20	C 1.695374 1.228173 0.000002 C 0.987967 0.035027 0.000005 C -0.558585 0.001899 0.000000 C -1.055149 -0.740485 1.262159 H -0.718227 -0.232451 2.173090 H -0.688192 -1.771297 1.300253 H 1.220295 2.200680 0.000008 C 1.691072 -1.172401 0.000005 H 1.198087 -2.138194 -0.000001 H 2.781863 1.217427 -0.000003 H 2.777045 -1.178917 0.000010 H -2.151481 -0.774995 1.278221 C -1.176136 1.412947 0.000012 H -0.88…	64.2872 217.1024 270.2442 270.5740 289.7559 330.7874 352.6067 378.4538 391.1063 475.9821 482.6958 531.0069 562.6355 626.4900 678.7229 754.1004 805.0232 866.5269 939.3734 946.2833 973.2643 999.1764 1048.1116 1062.0386 1062.4101 1230.6025 1242.2336 1246.7259 1336.2827 1389.6664 1426.8917 1427.1392 1460.6468 1510.9691 1512.3386 1516.9564 1520.3920 1537.3431 1537.3685 1551.3917 1561.7522 3042.6439 30…	0	1	0	0	0	3	2	0	0	0	0	0	0	0	0	0	1	0	0	0	0	0	0	0	0	0	0	0	0	0	0	0	0	0	0
290	[CH]=C([CH3])C([CH3])([CH3])[CH3]	C7H13	20	-274.477	-274.297	-274.287	-274.435	-274.259	-274.248	37.6971	2	1 2 2.0 10 1.0 2 3 1.0 7 1.0 3 4 1.0 13 1.0 17 1.0 4 5 1.0 6 1.0 12 1.0 5 6 7 8 1.0 9 1.0 11 1.0 8 9 10 11 12 13 14 1.0 15 1.0 16 1.0 14 15 16 17 18 1.0 19 1.0 20 1.0 18 19 20	C 1.392366 1.521096 -0.000004 C 0.930980 0.286027 -0.000001 C -0.577785 -0.024158 -0.000001 C -0.945604 -0.840055 1.260382 H -0.679361 -0.294369 2.172933 H -0.439896 -1.811479 1.285125 C 1.913123 -0.880952 0.000003 H 1.778937 -1.517166 0.883312 H 2.946858 -0.523553 0.000021 H 2.369664 1.990346 -0.000003 H 1.778963 -1.517149 -0.883322 H -2.025254 -1.031776 1.283860 C -1.395635 1.280436 -0.000036 H…	16.9206 171.5459 206.6270 257.2322 264.8377 272.6883 301.9907 340.8487 360.8547 371.8185 444.5163 475.6692 568.5763 661.4571 686.6305 847.5743 887.9022 937.5497 946.0986 972.2462 1001.5454 1027.9028 1067.5013 1070.2236 1149.0507 1240.3642 1253.4252 1289.6611 1421.6801 1422.0421 1430.7302 1455.1072 1504.5351 1513.3946 1513.9826 1516.5753 1521.2206 1536.2136 1536.3274 1548.0594 1685.5083 3041.6989 …	0	0	0	0	0	4	0	0	1	0	0	1	0	0	0	0	1	0	0	0	0	0	0	0	0	0	0	0	0	0	0	0	0	0	0
291	[CH2]=C([CH3])C([CH2])([CH3])[CH3]	C7H13	20	-274.491	-274.312	-274.301	-274.448	-274.273	-274.263	28.7846	2	1 2 2.0 6 1.0 10 1.0 2 3 1.0 7 1.0 3 4 1.0 13 1.0 17 1.0 4 5 1.0 12 1.0 5 6 7 8 1.0 9 1.0 11 1.0 8 9 10 11 12 13 14 1.0 15 1.0 16 1.0 14 15 16 17 18 1.0 19 1.0 20 1.0 18 19 20	C 1.453844 1.426098 -0.093418 C 0.914402 0.204527 -0.016464 C -0.602544 -0.053085 0.047272 C -0.931062 -0.721578 1.358231 H -0.515900 -0.336079 2.285186 H 0.864137 2.335341 -0.132766 C 1.806163 -1.018065 0.028664 H 1.538451 -1.674678 0.865811 H 2.857591 -0.734765 0.135711 H 2.532951 1.557789 -0.122743 H 1.716509 -1.619890 -0.884878 H -1.733678 -1.451138 1.424739 C -1.424034 1.258824 -0.046972 H -…	59.0432 118.0093 174.5643 224.9059 268.0809 292.7741 320.7427 335.2651 357.9998 384.1173 444.6573 486.1098 545.7334 565.6890 682.3286 742.6313 854.3039 926.4395 937.6221 950.1765 962.4367 996.9693 1025.2975 1058.3240 1084.7471 1167.1793 1228.8795 1246.7977 1303.0825 1415.1963 1434.0366 1436.9591 1470.8353 1481.5048 1507.2062 1516.3563 1523.1385 1528.3239 1533.0742 1546.5204 1723.1184 3040.0326 30…	0	0	0	0	1	3	0	0	0	1	0	1	0	0	0	0	1	0	0	0	0	0	0	0	0	0	0	0	0	0	0	0	0	0	0
292	CCC(=C)C(C)C	C7H14	21	-275.164	-274.97	-274.96	-275.116	-274.926	-274.916	-18.5366	1	1 2 2.0 7 1.0 10 1.0 2 3 1.0 8 1.0 3 4 1.0 13 1.0 17 1.0 4 5 1.0 6 1.0 12 1.0 5 6 7 8 9 1.0 11 1.0 18 1.0 9 10 11 12 13 14 1.0 15 1.0 16 1.0 14 15 16 17 18 19 1.0 20 1.0 21 1.0 19 20 21	C -0.822739 1.701586 -0.000060 C -0.275206 0.481038 -0.000019 C 1.243896 0.325891 -0.000018 C 1.765316 -0.379292 -1.267767 H 1.406741 0.120394 -2.174653 H 1.447156 -1.427604 -1.310704 H -0.205065 2.596735 -0.000097 C -1.103568 -0.791212 0.000036 H -0.817683 -1.398317 -0.871213 H -1.896131 1.863674 -0.000059 H -0.817689 -1.398232 0.871347 H 2.861649 -0.370031 -1.286199 C 1.765333 -0.379160 1.26779…	29.2488 79.8655 214.9957 225.0150 251.7101 254.7929 282.7533 320.9494 341.2413 481.5892 540.5092 541.5895 730.7852 735.8954 819.7109 876.9214 923.5028 939.4244 950.1149 971.3774 1033.5422 1068.1516 1111.7690 1126.1300 1138.6523 1200.8992 1277.4240 1316.3804 1361.1375 1363.8215 1406.7741 1423.2443 1435.7500 1444.6427 1482.7277 1509.7051 1519.1988 1524.4632 1529.3392 1534.6015 1539.9612 1542.5744 1…	0	0	0	0	0	3	0	0	0	1	0	1	0	1	0	1	0	0	0	0	0	0	0	0	0	0	0	0	0	0	0	0	0	0	0
293	[CH3][CH2]C(=[CH2])[C@H]([CH2])[CH3]	C7H13	20	-274.492	-274.313	-274.303	-274.447	-274.271	-274.261	29.8291	2	1 2 2.0 7 1.0 10 1.0 2 3 1.0 8 1.0 3 4 1.0 12 1.0 16 1.0 4 5 1.0 6 1.0 5 6 7 8 9 1.0 11 1.0 17 1.0 9 10 11 12 13 1.0 14 1.0 15 1.0 13 14 15 16 17 18 1.0 19 1.0 20 1.0 18 19 20	C 0.782504 1.697634 -0.130311 C 0.242963 0.477657 -0.041204 C -1.277326 0.309806 0.046972 C -1.694158 -0.275249 1.363667 H -1.256632 0.089895 2.288133 H -2.529090 -0.966559 1.433503 H 0.161463 2.590205 -0.150956 C 1.062941 -0.797745 -0.004585 H 0.735712 -1.387076 0.864678 H 1.854447 1.860340 -0.185893 H 0.797298 -1.412928 -0.877055 C -1.858930 -0.491939 -1.136334 H -1.521230 -1.533885 -1.123091 H…	56.3512 78.1631 103.2441 216.9420 222.9787 253.5618 278.5479 320.9686 339.4733 453.3174 484.0549 542.1185 587.3440 738.5286 740.4310 818.8000 884.5305 920.2369 925.0104 967.9640 1028.9795 1034.1723 1094.0072 1120.0460 1141.2677 1161.4473 1264.5923 1302.1879 1310.3916 1336.4567 1402.9100 1429.3083 1436.0416 1476.6927 1482.5467 1508.9710 1527.9411 1528.7377 1533.3408 1540.4609 1726.1627 2942.0218 3…	0	0	0	0	1	2	0	0	0	1	0	1	0	1	0	1	0	0	0	0	0	0	0	0	0	0	0	0	0	0	0	0	0	0	0
294	[CH2][CH2]C(=[CH2])[CH]([CH3])[CH3]	C7H13	20	-274.492	-274.312	-274.302	-274.446	-274.27	-274.26	30.4362	2	1 2 2.0 7 1.0 10 1.0 2 3 1.0 8 1.0 3 4 1.0 13 1.0 17 1.0 4 5 1.0 6 1.0 12 1.0 5 6 7 8 9 1.0 11 1.0 18 1.0 9 10 11 12 13 14 1.0 15 1.0 16 1.0 14 15 16 17 18 19 1.0 20 1.0 19 20	C -0.899699 1.647001 -0.397151 C -0.330083 0.456992 -0.179774 C 1.184510 0.326496 -0.067309 C 1.762802 -0.695384 -1.064878 H 1.468031 -0.457426 -2.093228 H 1.423711 -1.714376 -0.843161 H -0.302476 2.549495 -0.505082 C -1.152291 -0.820364 -0.056181 H -1.064425 -1.393024 -0.992134 H -1.976414 1.762302 -0.483584 H -0.674136 -1.470574 0.701439 H 2.858169 -0.697925 -1.018569 C 1.632979 0.000597 1.3717…	70.3266 78.1568 177.1070 212.1138 233.4096 250.1583 261.0527 321.5652 334.1040 464.0909 498.7982 529.2888 564.0671 734.2706 747.8606 854.6265 898.7960 929.9934 939.5554 954.0306 971.6915 1049.3571 1082.5082 1118.5284 1132.3095 1200.0360 1232.0826 1282.1922 1358.8703 1362.1103 1383.1758 1423.2318 1444.6907 1466.6232 1486.5808 1488.9776 1519.1878 1524.6359 1533.8509 1540.9713 1724.4314 2937.7016 30…	0	0	0	0	1	2	0	0	0	1	0	1	0	1	0	1	0	0	0	0	0	0	0	0	0	0	0	0	0	0	0	0	0	0	0
295	[CH3]/[CH]=C(\[CH2])/[CH]([CH3])[CH3] or [CH3][CH]C(=[CH2])[CH]([CH3])[CH3]	C7H13	20	-274.521	-274.341	-274.331	-274.47	-274.294	-274.284	15.492	2	1 2 1.5 7 1.0 10 1.0 2 3 1.0 8 1.5 3 4 1.0 12 1.0 16 1.0 4 5 1.0 6 1.0 11 1.0 5 6 7 8 9 1.0 17 1.0 9 10 11 12 13 1.0 14 1.0 15 1.0 13 14 15 16 17 18 1.0 19 1.0 20 1.0 18 19 20	C -0.863173 1.713824 0.000003 C -0.308481 0.447371 0.000001 C 1.218367 0.309737 0.000001 C 1.735115 -0.390728 -1.269699 H 1.396090 0.128637 -2.172857 H 1.381753 -1.427053 -1.328526 H -0.239561 2.602684 0.000005 C -1.097142 -0.713297 -0.000001 H -0.593926 -1.677098 -0.000010 H -1.936826 1.872976 0.000002 H 2.831629 -0.413512 -1.280337 C 1.735115 -0.390736 1.269697 H 1.381752 -1.427060 1.328519 H 2…	24.8488 60.2097 136.3200 209.2515 232.9370 260.0632 285.9476 319.4784 329.8399 485.8868 557.8322 562.7213 593.2277 697.0066 757.0592 793.9807 907.1821 940.1787 957.9090 972.5684 1028.0219 1069.3140 1111.1454 1135.0672 1147.5410 1199.5432 1284.8492 1315.3975 1363.9391 1420.0819 1426.0267 1434.4162 1447.1188 1484.1268 1511.1239 1517.9152 1519.2905 1521.3067 1533.3637 1538.7126 1563.1686 3016.6649 3…	1	1	0	0	0	3	1	0	0	0	0	0	0	0	0	1	0	0	0.0497871	0	0	0	0.0500339	0.00247875	0	0	0	0	0	0	0	0	0.00247875	0	0
296	[CH3][CH2]C(=[CH])[CH]([CH3])[CH3]	C7H13	20	-274.478	-274.297	-274.287	-274.432	-274.256	-274.245	39.6719	2	1 2 2.0 7 1.0 2 3 1.0 8 1.0 3 4 1.0 12 1.0 16 1.0 4 5 1.0 6 1.0 11 1.0 5 6 7 8 9 1.0 10 1.0 17 1.0 9 10 11 12 13 1.0 14 1.0 15 1.0 13 14 15 16 17 18 1.0 19 1.0 20 1.0 18 19 20	C -0.817056 1.715105 -0.000076 C -0.298350 0.503403 -0.000022 C 1.232961 0.331199 -0.000019 C 1.732643 -0.381569 -1.270376 H 1.383662 0.129520 -2.174360 H 1.388248 -1.421286 -1.314204 H -0.435458 2.729697 -0.000125 C -1.160322 -0.749239 0.000038 H -0.896415 -1.362561 -0.873424 H -0.896411 -1.362480 0.873557 H 2.829030 -0.398041 -1.291015 C 1.732651 -0.381451 1.270402 H 1.388257 -1.421164 1.314328…	29.3556 75.2817 209.3791 209.9201 240.2636 254.9111 266.7501 302.1477 320.8459 453.3544 528.3712 539.3161 695.5052 735.4727 807.4732 828.2044 922.4415 938.9262 970.4034 984.7458 1052.8601 1097.2310 1116.1299 1137.1904 1192.2179 1210.1142 1307.4707 1358.1430 1364.7232 1385.7625 1422.7237 1438.3039 1443.9689 1506.5064 1518.3760 1522.6509 1524.8836 1532.0907 1533.5264 1540.2393 1689.2679 3025.4505 3…	0	0	0	0	0	3	0	0	1	0	0	1	0	1	0	1	0	0	0	0	0	0	0	0	0	0	0	0	0	0	0	0	0	0	0
297	CCCCCCC	C7H16	23	-276.399	-276.181	-276.17	-276.339	-276.125	-276.115	-46.1465	1	1 2 1.0 3 1.0 4 1.0 5 1.0 2 3 4 5 6 1.0 7 1.0 8 1.0 6 7 8 9 1.0 10 1.0 11 1.0 9 10 11 12 1.0 13 1.0 14 1.0 12 13 14 15 1.0 16 1.0 17 1.0 15 16 17 18 1.0 19 1.0 20 1.0 18 19 20 21 1.0 22 1.0 23 1.0 21 22 23	C 0.000000 3.844533 -0.352058 H -0.884606 3.891009 -0.999287 H 0.884606 3.891009 -0.999287 H 0.000000 4.742596 0.276338 C 0.000000 2.567600 0.494621 H 0.878012 2.567080 1.156275 H -0.878012 2.567080 1.156275 C 0.000000 1.283728 -0.345173 H 0.878461 1.284880 -1.007873 H -0.878461 1.284880 -1.007873 C 0.000000 0.000000 0.494632 H -0.878470 0.000000 1.157200 H 0.878470 0.000000 1.157200 C 0.000000 -…	63.1991 75.9456 99.1123 141.5969 146.0465 244.5742 248.7286 250.6269 301.3986 416.8297 481.0454 738.0694 744.7251 780.2883 854.4069 888.6334 924.9830 947.9476 1003.5641 1037.3444 1045.1660 1071.9417 1072.8407 1099.0057 1166.4147 1221.3657 1257.6463 1273.3543 1308.4207 1335.4947 1339.8673 1346.7685 1352.6173 1388.4780 1420.7145 1425.8844 1440.7694 1441.7537 1513.7452 1514.5248 1518.2973 1524.5930 …	0	0	0	0	0	2	0	0	0	0	0	0	0	5	0	0	0	0	0	0	0	0	0	0	0	0	0	0	0	0	0	0	0	0	0
298	[CH3][CH][CH2][CH2][CH2][CH2][CH3]	C7H15	22	-275.733	-275.53	-275.518	-275.674	-275.475	-275.464	-0.164555	2	1 2 1.0 3 1.0 4 1.0 5 1.0 2 3 4 5 6 1.0 7 1.0 6 7 8 1.0 9 1.0 10 1.0 8 9 10 11 1.0 12 1.0 13 1.0 11 12 13 14 1.0 15 1.0 16 1.0 14 15 16 17 1.0 18 1.0 19 1.0 17 18 19 20 1.0 21 1.0 22 1.0 20 21 22	C 3.914236 -0.224033 -0.138138 H 3.870822 -0.974654 -0.939838 H 4.272676 -0.757576 0.761957 H 4.688439 0.506504 -0.399640 C 2.587416 0.424720 0.079046 H 2.565023 1.443115 0.464486 C 1.321640 -0.369908 0.122599 H 1.259495 -0.940740 1.071200 H 1.341905 -1.140314 -0.665362 C 0.047757 0.478666 -0.019200 H 0.085035 1.025495 -0.971841 H 0.036898 1.243816 0.771061 C -1.245320 -0.342154 0.051407 H -1.276…	44.5741 66.9799 95.6134 111.8514 119.9009 151.2376 248.5744 249.9436 305.6999 402.5899 426.3233 481.0585 736.9068 758.4465 843.1361 891.9086 929.2266 963.1120 1001.2551 1011.6932 1052.3990 1071.3067 1086.5226 1124.2071 1146.4728 1179.1338 1239.8769 1269.8399 1300.7838 1330.3386 1340.6380 1345.9043 1387.0978 1422.2057 1430.9295 1440.5443 1441.3432 1499.0387 1505.2494 1515.1026 1517.1233 1519.7571 …	0	0	0	0	0	2	0	0	0	0	0	0	1	4	0	0	0	0	0	0	0	0	0	0	0	0	0	0	0	0	0	0	0	0	0
299	[CH2][CH2][CH2][CH2][CH2][CH2][CH3]	C7H15	22	-275.726	-275.523	-275.512	-275.669	-275.47	-275.459	2.77996	2	1 2 1.0 3 1.0 4 1.0 2 3 4 5 1.0 6 1.0 7 1.0 5 6 7 8 1.0 9 1.0 10 1.0 8 9 10 11 1.0 12 1.0 13 1.0 11 12 13 14 1.0 15 1.0 16 1.0 14 15 16 17 1.0 18 1.0 19 1.0 17 18 19 20 1.0 21 1.0 22 1.0 20 21 22	C 3.888580 -0.359697 -0.006818 H 3.916162 -1.332632 0.476280 H 4.830128 0.054464 -0.353820 C 2.643352 0.461452 0.011078 H 2.615122 1.090958 0.922328 H 2.654755 1.176530 -0.825100 C 1.350551 -0.371421 -0.038652 H 1.352850 -1.085728 0.797851 H 1.348251 -0.976241 -0.956057 C 0.075647 0.478594 0.020836 H 0.077326 1.194936 -0.814365 H 0.085643 1.084524 0.939313 C -1.215006 -0.349103 -0.025830 H -1.218…	63.7812 76.1066 100.8400 115.8350 142.1572 153.2924 246.9458 249.7138 304.7486 410.4421 458.5761 490.4384 734.2377 743.1759 786.9580 864.3613 898.5462 925.6775 997.2351 1012.8913 1056.5452 1062.0339 1075.1524 1092.3297 1127.2477 1172.5107 1233.9616 1268.0256 1287.4459 1325.1841 1334.1064 1344.8055 1349.8469 1384.4839 1416.2252 1425.2882 1441.3323 1487.5250 1498.6198 1514.8523 1515.7611 1524.2687 …	0	0	0	0	1	1	0	0	0	0	0	0	0	5	0	0	0	0	0	0	0	0	0	0	0	0	0	0	0	0	0	0	0	0	0
300	[CH3][CH2][CH2][CH][CH2][CH2][CH3]	C7H15	22	-275.733	-275.529	-275.518	-275.674	-275.475	-275.464	-0.0134322	2	1 2 1.0 3 1.0 4 1.0 5 1.0 2 3 4 5 6 1.0 7 1.0 8 1.0 6 7 8 9 1.0 10 1.0 11 1.0 9 10 11 12 1.0 13 1.0 12 13 14 1.0 15 1.0 16 1.0 14 15 16 17 1.0 18 1.0 19 1.0 17 18 19 20 1.0 21 1.0 22 1.0 20 21 22	C -0.156979 -0.236444 3.840851 H 0.829772 -0.665392 4.055481 H -0.880513 -1.061117 3.833564 H -0.419145 0.428179 4.671929 C -0.156979 0.512343 2.505063 H -1.145210 0.957752 2.329037 H 0.551576 1.351165 2.553991 C 0.209338 -0.382461 1.309473 H -0.496459 -1.226799 1.252147 H 1.192932 -0.851819 1.514172 C 0.240103 0.338412 0.000000 H 0.548915 1.384338 0.000000 C 0.209338 -0.382461 -1.309473 H -0.496…	35.2867 42.6715 86.9047 118.5319 155.3843 242.9567 245.2912 245.5531 302.6342 419.5559 426.8470 481.9448 737.3998 750.1668 857.3163 880.6018 888.5262 921.5900 1005.9546 1051.7550 1062.2511 1070.8101 1097.4823 1119.7587 1146.8828 1177.0241 1256.8366 1266.9219 1270.7671 1330.2505 1332.9598 1337.0950 1384.9473 1415.6132 1438.3141 1440.4994 1444.8374 1495.2151 1505.7726 1521.6754 1522.1000 1529.1777 …	0	0	0	0	0	2	0	0	0	0	0	0	1	4	0	0	0	0	0	0	0	0	0	0	0	0	0	0	0	0	0	0	0	0	0
301	[CH3][CH2][CH2][CH2][CH][CH2][CH3]	C7H15	22	-275.733	-275.529	-275.518	-275.674	-275.475	-275.464	0.0655843	2	1 2 1.0 3 1.0 4 1.0 5 1.0 2 3 4 5 6 1.0 7 1.0 8 1.0 6 7 8 9 1.0 10 1.0 11 1.0 9 10 11 12 1.0 13 1.0 14 1.0 12 13 14 15 1.0 16 1.0 15 16 17 1.0 18 1.0 19 1.0 17 18 19 20 1.0 21 1.0 22 1.0 20 21 22	C -3.777933 -0.452970 -0.099446 H -3.853977 -1.044721 0.821203 H -3.733213 -1.155971 -0.940418 H -4.702461 0.127183 -0.199457 C -2.545621 0.456911 -0.072429 H -2.516769 1.061115 -0.990510 H -2.635906 1.171670 0.758146 C -1.227788 -0.314639 0.066235 H -1.131215 -1.028575 -0.763878 H -1.255375 -0.918429 0.985432 C 0.013639 0.591760 0.097579 H -0.111319 1.327519 0.917641 H 0.049224 1.200058 -0.82055…	39.3279 43.7541 90.1010 120.9618 133.3624 237.8045 248.9416 252.5271 308.8804 412.3925 424.6515 482.5933 736.8281 772.3159 797.6586 891.0513 922.7281 939.9738 1006.7293 1043.8928 1054.8168 1070.6262 1089.1414 1122.6470 1147.8802 1177.8061 1247.8733 1266.2975 1286.9459 1320.1054 1330.0123 1343.7075 1385.0967 1419.4280 1436.6163 1440.0056 1444.5456 1496.1120 1507.0492 1516.4971 1527.4104 1527.9090 …	0	0	0	0	0	2	0	0	0	0	0	0	1	4	0	0	0	0	0	0	0	0	0	0	0	0	0	0	0	0	0	0	0	0	0
302	CCCCC(C)C	C7H16	23	-276.398	-276.18	-276.17	-276.34	-276.127	-276.116	-47.1022	1	1 2 1.0 3 1.0 4 1.0 5 1.0 2 3 4 5 6 1.0 7 1.0 20 1.0 6 7 8 1.0 9 1.0 10 1.0 8 9 10 11 1.0 12 1.0 13 1.0 11 12 13 14 1.0 15 1.0 16 1.0 14 15 16 17 1.0 18 1.0 19 1.0 17 18 19 20 21 1.0 22 1.0 23 1.0 21 22 23	C 2.825334 -0.907446 -0.045515 H 2.662134 -1.903603 -0.474114 H 2.964558 -1.029958 1.036771 H 3.762407 -0.513882 -0.457252 C 1.646481 0.031306 -0.343720 H 1.552039 0.113722 -1.438003 C 0.330483 -0.566717 0.192986 H 0.388605 -0.627844 1.291018 H 0.249762 -1.604638 -0.162630 C -0.946022 0.186009 -0.206871 H -0.977736 0.291283 -1.302046 H -0.924579 1.207704 0.196484 C -2.229892 -0.507138 0.269195 H …	59.4668 84.3696 128.7115 142.5227 228.8244 245.6203 254.7039 299.4507 304.9337 409.5503 434.7987 479.2444 742.0824 793.5536 829.5230 910.0383 923.8658 938.0961 958.4822 975.0322 1035.5678 1052.4378 1073.1659 1099.0766 1174.6593 1204.1744 1216.8628 1267.1642 1293.9092 1332.3125 1347.8382 1357.2580 1388.0149 1400.8283 1422.7960 1430.3540 1440.8295 1449.3146 1509.1839 1517.1206 1520.3139 1524.8938 1…	0	0	0	0	0	3	0	0	0	0	0	0	0	3	0	1	0	0	0	0	0	0	0	0	0	0	0	0	0	0	0	0	0	0	0
303	[CH2][CH2][CH2][CH2][CH]([CH3])[CH3]	C7H15	22	-275.726	-275.523	-275.512	-275.67	-275.472	-275.461	1.78011	2	1 2 1.0 3 1.0 4 1.0 5 1.0 2 3 4 5 6 1.0 7 1.0 19 1.0 6 7 8 1.0 9 1.0 10 1.0 8 9 10 11 1.0 12 1.0 13 1.0 11 12 13 14 1.0 15 1.0 16 1.0 14 15 16 17 1.0 18 1.0 17 18 19 20 1.0 21 1.0 22 1.0 20 21 22	C 2.753828 -0.917634 -0.030769 H 2.588807 -1.913852 -0.458491 H 2.881626 -1.038068 1.053145 H 3.697202 -0.530798 -0.434287 C 1.583919 0.027652 -0.343213 H 1.500777 0.107746 -1.438491 C 0.259260 -0.561268 0.181925 H 0.306037 -0.621143 1.280629 H 0.175328 -1.599091 -0.173273 C -1.006830 0.200164 -0.232080 H -1.033132 0.304138 -1.325961 H -0.985619 1.220734 0.173080 C -2.301424 -0.487508 0.237386 H …	61.1434 84.7940 115.3362 132.1638 147.7605 229.0346 252.7863 299.4781 308.2860 408.6647 433.9275 452.3339 490.8557 736.0992 803.4989 835.7684 907.6106 938.4537 955.1258 974.7564 998.8709 1056.5895 1067.5940 1093.1989 1134.5309 1174.7565 1204.7547 1233.0391 1288.3186 1305.8351 1342.0410 1355.3840 1387.7295 1395.8397 1419.9358 1430.2912 1449.1680 1487.4897 1498.6875 1509.3566 1520.3870 1525.2897 15…	0	0	0	0	1	2	0	0	0	0	0	0	0	3	0	1	0	0	0	0	0	0	0	0	0	0	0	0	0	0	0	0	0	0	0
304	[CH3][CH2][CH2][CH2][C@H]([CH3])[CH2]	C7H15	22	-275.726	-275.523	-275.512	-275.671	-275.472	-275.461	1.66158	2	1 2 1.0 3 1.0 4 1.0 5 1.0 2 3 4 5 6 1.0 7 1.0 20 1.0 6 7 8 1.0 9 1.0 10 1.0 8 9 10 11 1.0 12 1.0 13 1.0 11 12 13 14 1.0 15 1.0 16 1.0 14 15 16 17 1.0 18 1.0 19 1.0 17 18 19 20 21 1.0 22 1.0 21 22	C 2.893062 -0.813617 -0.035234 H 2.767268 -1.799093 -0.501703 H 3.015236 -0.961947 1.044376 H 3.818468 -0.370672 -0.419359 C 1.671955 0.094592 -0.330655 H 1.596328 0.181360 -1.426300 C 0.373417 -0.559725 0.185153 H 0.419178 -0.617662 1.283752 H 0.331832 -1.598671 -0.172431 C -0.907920 0.170719 -0.235526 H -0.951454 0.220432 -1.334083 H -0.864780 1.212608 0.111920 C -2.188069 -0.490246 0.291091 H …	70.0683 82.9824 124.1691 132.8934 153.9155 244.3090 248.8809 286.4814 297.3602 380.1087 426.8723 469.0748 545.9646 742.7128 798.6725 845.3351 910.4921 916.1731 942.1766 970.0766 1022.4033 1044.2674 1052.6211 1075.9178 1123.5272 1177.1741 1209.0662 1262.8738 1290.0734 1328.6187 1335.0302 1346.4198 1378.7037 1397.0060 1417.7137 1428.0940 1441.0345 1485.8150 1514.0749 1517.1363 1523.8539 1527.1962 1…	0	0	0	0	1	2	0	0	0	0	0	0	0	3	0	1	0	0	0	0	0	0	0	0	0	0	0	0	0	0	0	0	0	0	0
305	[CH3][CH][CH2][CH2][CH]([CH3])[CH3]	C7H15	22	-275.732	-275.529	-275.518	-275.675	-275.477	-275.466	-1.20453	2	1 2 1.0 3 1.0 4 1.0 5 1.0 2 3 4 5 6 1.0 7 1.0 19 1.0 6 7 8 1.0 9 1.0 10 1.0 8 9 10 11 1.0 12 1.0 13 1.0 11 12 13 14 1.0 15 1.0 14 15 16 1.0 17 1.0 18 1.0 16 17 18 19 20 1.0 21 1.0 22 1.0 20 21 22	C -2.791028 -0.902502 -0.053094 H -2.649766 -1.915117 0.343500 H -2.887866 -0.983066 -1.143848 H -3.741638 -0.518736 0.336181 C -1.620585 0.016913 0.326945 H -1.569194 0.057817 1.426531 C -0.288469 -0.569132 -0.179605 H -0.297830 -0.591808 -1.279346 H -0.222424 -1.617902 0.144852 C 0.975809 0.165055 0.299276 H 0.928759 0.258746 1.403563 H 0.981064 1.201068 -0.071159 C 2.246927 -0.509493 -0.107776…	45.0100 74.5533 108.5274 111.9345 149.0736 228.0792 252.9753 298.2851 309.5167 404.8254 417.4863 442.6744 477.2310 760.8532 826.2695 914.0199 936.6867 938.4351 964.6733 976.1007 1006.2688 1049.2621 1089.3200 1131.8549 1147.9508 1182.7963 1205.0940 1242.0887 1288.8935 1324.9397 1353.6999 1387.8429 1399.4795 1427.7892 1432.0110 1440.7269 1449.1310 1498.6149 1505.1328 1514.6291 1518.4470 1520.7705 1…	0	0	0	0	0	3	0	0	0	0	0	0	1	2	0	1	0	0	0	0	0	0	0	0	0	0	0	0	0	0	0	0	0	0	0
306	[CH3][CH2][CH2][CH][CH]([CH3])[CH3]	C7H15	22	-275.733	-275.529	-275.518	-275.675	-275.476	-275.465	-0.89309	2	1 2 1.0 3 1.0 4 1.0 5 1.0 2 3 4 5 6 1.0 7 1.0 19 1.0 6 7 8 1.0 9 1.0 8 9 10 1.0 11 1.0 12 1.0 10 11 12 13 1.0 14 1.0 15 1.0 13 14 15 16 1.0 17 1.0 18 1.0 16 17 18 19 20 1.0 21 1.0 22 1.0 20 21 22	C 2.648762 -1.131112 -0.116534 H 2.276262 -2.078492 -0.521641 H 2.847523 -1.279853 0.952782 H 3.604488 -0.903439 -0.603469 C 1.631997 0.003277 -0.328716 H 1.467192 0.117276 -1.412236 C 0.312036 -0.313184 0.312116 H 0.328642 -0.815283 1.280953 C -0.973975 0.313421 -0.123946 H -0.955830 0.479610 -1.212592 H -1.084749 1.324379 0.317049 C -2.221218 -0.507337 0.248957 H -2.227827 -0.673227 1.335420 H …	28.1590 44.0834 100.2204 169.9821 229.5250 243.7311 254.7230 274.5674 299.3633 356.8297 414.5248 477.5284 536.8940 744.8793 831.5368 873.7308 904.7197 934.2055 946.5754 967.4068 1048.6671 1067.7923 1094.0265 1111.4053 1137.4389 1191.2479 1202.8257 1262.9570 1282.0253 1332.5888 1344.2134 1352.5713 1401.3970 1419.0760 1433.9302 1440.0723 1448.5292 1500.7359 1517.5545 1519.4405 1521.6640 1529.2016 1…	0	0	0	0	0	3	0	0	0	0	0	0	1	2	0	1	0	0	0	0	0	0	0	0	0	0	0	0	0	0	0	0	0	0	0
307	[CH3][CH2][CH2][CH2]C([CH3])[CH3]	C7H15	22	-275.738	-275.535	-275.523	-275.678	-275.48	-275.468	-2.76926	2	1 2 1.0 3 1.0 4 1.0 5 1.0 2 3 4 5 6 1.0 19 1.0 6 7 1.0 8 1.0 9 1.0 7 8 9 10 1.0 11 1.0 12 1.0 10 11 12 13 1.0 14 1.0 15 1.0 13 14 15 16 1.0 17 1.0 18 1.0 16 17 18 19 20 1.0 21 1.0 22 1.0 20 21 22	C 2.486125 -1.212881 -0.294691 H 1.861552 -2.102333 -0.444542 H 3.198895 -1.462625 0.514226 H 3.092160 -1.069393 -1.199896 C 1.665242 -0.002363 0.025291 C 0.335356 -0.145079 0.711572 H 0.240574 0.601436 1.516830 H 0.262661 -1.129615 1.196183 C -0.876910 0.020426 -0.237357 H -0.813034 -0.732475 -1.035638 H -0.814140 0.998565 -0.735268 C -2.228088 -0.102678 0.478316 H -2.284407 0.650827 1.277022 H …	8.9574 68.9878 84.3211 105.2515 113.3300 123.2178 230.0654 247.5227 307.5547 378.0178 416.7065 433.7142 740.3185 783.6164 798.7019 905.5253 938.0642 958.9795 981.1940 993.9853 1023.5474 1049.2237 1060.6634 1089.6393 1123.5073 1241.1637 1276.9705 1302.6334 1314.4197 1342.0083 1359.0976 1372.9788 1408.1060 1428.7310 1440.2934 1446.0003 1499.9770 1504.5215 1509.0100 1514.0809 1516.9246 1525.9458 152…	0	0	0	0	0	3	0	0	0	0	0	0	0	3	1	0	0	0	0	0	0	0	0	0	0	0	0	0	0	0	0	0	0	0	0
308	[CH3][CH2][CH][CH2][CH]([CH3])[CH3]	C7H15	22	-275.733	-275.53	-275.519	-275.676	-275.478	-275.467	-1.82648	2	1 2 1.0 3 1.0 4 1.0 5 1.0 2 3 4 5 6 1.0 7 1.0 19 1.0 6 7 8 1.0 9 1.0 10 1.0 8 9 10 11 1.0 12 1.0 11 12 13 1.0 14 1.0 15 1.0 13 14 15 16 1.0 17 1.0 18 1.0 16 17 18 19 20 1.0 21 1.0 22 1.0 20 21 22	C 2.908686 -0.661265 0.021723 H 2.941663 -1.663753 -0.421832 H 3.003698 -0.775183 1.109705 H 3.787867 -0.108878 -0.330673 C 1.609557 0.070931 -0.340829 H 1.559845 0.147088 -1.438310 C 0.373957 -0.733117 0.120355 H 0.371634 -0.793870 1.220918 H 0.497596 -1.779786 -0.222810 C -0.934345 -0.190827 -0.359546 H -0.973244 0.221212 -1.369055 C -2.231089 -0.519104 0.309103 H -2.096824 -0.503040 1.401653 H…	39.5816 44.5766 102.4442 168.8722 229.4099 244.8160 254.1497 291.3781 309.1118 404.6873 424.4150 454.8526 481.8988 775.8578 818.4011 873.0178 918.3273 939.6971 955.9413 975.7286 1036.9606 1057.2588 1087.9160 1128.6173 1147.4067 1191.2902 1203.8963 1254.1276 1283.4491 1288.9341 1353.7637 1381.5421 1397.5583 1428.0142 1436.1163 1439.8625 1448.5685 1492.9578 1505.0098 1517.9311 1524.0573 1527.7480 1…	0	0	0	0	0	3	0	0	0	0	0	0	1	2	0	1	0	0	0	0	0	0	0	0	0	0	0	0	0	0	0	0	0	0	0
309	CCC[C@@H](C)CC	C7H16	23	-276.397	-276.178	-276.168	-276.339	-276.126	-276.115	-46.3378	1	1 2 1.0 3 1.0 4 1.0 5 1.0 2 3 4 5 6 1.0 7 1.0 8 1.0 6 7 8 9 1.0 10 1.0 20 1.0 9 10 11 1.0 12 1.0 13 1.0 11 12 13 14 1.0 15 1.0 16 1.0 14 15 16 17 1.0 18 1.0 19 1.0 17 18 19 20 21 1.0 22 1.0 23 1.0 21 22 23	C 3.104335 -0.439264 -0.263145 H 3.452179 0.548710 0.057577 H 3.106369 -0.452161 -1.360456 H 3.844906 -1.172030 0.077549 C 1.713681 -0.771671 0.290465 H 1.470367 -1.810389 0.026561 H 1.739485 -0.737350 1.390002 C 0.572808 0.138168 -0.212102 H 0.591710 0.112178 -1.314152 C -0.790456 -0.423974 0.242173 H -0.851873 -0.372406 1.340571 H -0.827757 -1.493911 -0.011209 C -2.024263 0.258550 -0.365223 H -…	64.7608 77.0938 107.9582 152.7926 213.2103 244.9106 262.5542 299.1432 321.5646 376.1022 434.6608 504.5877 749.7364 780.2922 827.3390 877.8520 888.3094 945.8336 981.6930 1004.2650 1041.3360 1052.1782 1069.4014 1097.7795 1178.6231 1187.8224 1213.7811 1275.5690 1305.4023 1319.9338 1345.5196 1358.1521 1397.7808 1402.5593 1418.2442 1439.1669 1441.8597 1443.1490 1507.3953 1517.9681 1523.9760 1527.4070 …	0	0	0	0	0	3	0	0	0	0	0	0	0	3	0	1	0	0	0	0	0	0	0	0	0	0	0	0	0	0	0	0	0	0	0
310	[CH2][CH2][CH2][C@@H]([CH3])[CH2][CH3]	C7H15	22	-275.724	-275.521	-275.51	-275.669	-275.471	-275.46	2.52261	2	1 2 1.0 3 1.0 4 1.0 5 1.0 2 3 4 5 6 1.0 7 1.0 8 1.0 6 7 8 9 1.0 10 1.0 19 1.0 9 10 11 1.0 12 1.0 13 1.0 11 12 13 14 1.0 15 1.0 16 1.0 14 15 16 17 1.0 18 1.0 17 18 19 20 1.0 21 1.0 22 1.0 20 21 22	C -3.041912 -0.420722 0.278266 H -3.383213 0.571555 -0.036068 H -3.033263 -0.437155 1.375475 H -3.792782 -1.145198 -0.057455 C -1.660178 -0.765059 -0.290222 H -1.424261 -1.806743 -0.031434 H -1.696488 -0.727344 -1.389263 C -0.506089 0.132666 0.203724 H -0.514671 0.104743 1.305937 C 0.845966 -0.442512 -0.264909 H 0.902428 -0.392989 -1.362124 H 0.880175 -1.511042 -0.007071 C 2.092595 0.234621 0.334…	67.5982 78.0286 109.0220 126.5572 155.1434 213.7846 258.2326 299.8749 325.9319 375.5379 431.9029 458.0492 512.1510 747.0282 781.2742 828.6820 876.4083 929.0286 966.6092 987.0322 1019.5470 1053.5168 1070.8984 1093.3772 1132.2268 1179.9244 1189.8047 1232.0690 1298.8149 1313.1890 1327.3247 1353.5106 1396.6773 1401.9747 1413.7909 1440.3673 1442.9281 1487.6204 1498.2409 1511.6904 1521.6364 1527.5240 1…	0	0	0	0	1	2	0	0	0	0	0	0	0	3	0	1	0	0	0	0	0	0	0	0	0	0	0	0	0	0	0	0	0	0	0
311	[CH3][CH][CH2][C@@H]([CH3])[CH2][CH3]	C7H15	22	-275.732	-275.529	-275.518	-275.675	-275.477	-275.466	-1.37764	2	1 2 1.0 3 1.0 4 1.0 5 1.0 2 3 4 5 6 1.0 7 1.0 8 1.0 6 7 8 9 1.0 10 1.0 19 1.0 9 10 11 1.0 12 1.0 13 1.0 11 12 13 14 1.0 15 1.0 14 15 16 1.0 17 1.0 18 1.0 16 17 18 19 20 1.0 21 1.0 22 1.0 20 21 22	C 3.106499 -0.262274 -0.210341 H 3.349672 0.742163 0.152878 H 3.148090 -0.238321 -1.306684 H 3.898443 -0.936197 0.136159 C 1.733168 -0.735168 0.280193 H 1.590320 -1.781425 -0.024948 H 1.718382 -0.735814 1.380505 C 0.538787 0.091750 -0.234765 H 0.582927 0.088675 -1.336207 C -0.795610 -0.572275 0.172911 H -0.895259 -0.545138 1.270514 H -0.736974 -1.649776 -0.080642 C -2.010197 0.030532 -0.457679 H …	50.0160 81.1585 97.3494 117.4755 178.0130 217.1887 258.4985 288.1848 326.3456 371.1167 427.9594 452.8214 501.2013 781.3531 822.8160 869.0383 896.7531 947.8581 983.4643 994.2028 1025.1835 1054.8118 1072.7949 1132.0309 1151.0856 1181.2692 1199.3060 1247.9939 1292.0367 1318.0322 1356.5574 1391.8261 1403.2212 1423.9733 1438.4430 1440.4165 1441.8510 1494.2840 1505.2403 1514.5272 1517.2892 1526.0394 15…	0	0	0	0	0	3	0	0	0	0	0	0	1	2	0	1	0	0	0	0	0	0	0	0	0	0	0	0	0	0	0	0	0	0	0
312	[CH3][CH2][CH2][C@@H]([CH3])[CH2][CH2]	C7H15	22	-275.725	-275.522	-275.511	-275.67	-275.472	-275.461	1.60742	2	1 2 1.0 3 1.0 4 1.0 2 3 4 5 1.0 6 1.0 7 1.0 5 6 7 8 1.0 9 1.0 19 1.0 8 9 10 1.0 11 1.0 12 1.0 10 11 12 13 1.0 14 1.0 15 1.0 13 14 15 16 1.0 17 1.0 18 1.0 16 17 18 19 20 1.0 21 1.0 22 1.0 20 21 22	C 3.119270 -0.445803 -0.288513 H 3.224408 -0.164582 -1.333286 H 4.029638 -0.625895 0.274266 C 1.778423 -0.787124 0.269243 H 1.518859 -1.829875 0.002157 H 1.813647 -0.771937 1.368839 C 0.628693 0.127396 -0.218231 H 0.652129 0.120336 -1.320131 C -0.733777 -0.440891 0.224327 H -0.787917 -0.427330 1.324235 H -0.782597 -1.500810 -0.066975 C -1.963070 0.277060 -0.350032 H -1.884141 0.307530 -1.446440 H…	75.2085 83.3525 117.1945 130.6658 153.0131 238.5099 252.2561 281.0925 321.5965 373.3183 421.0991 464.1595 522.3636 751.1042 819.8036 830.3263 878.1932 896.0378 952.9457 979.6730 1026.8789 1051.1643 1076.2185 1097.9112 1129.1654 1177.3073 1202.6647 1250.1146 1278.7626 1304.9339 1345.2141 1350.2481 1392.4515 1395.4068 1418.6005 1437.6157 1441.4816 1486.3717 1495.6957 1512.9409 1524.0933 1528.9160 1…	0	0	0	0	1	2	0	0	0	0	0	0	0	3	0	1	0	0	0	0	0	0	0	0	0	0	0	0	0	0	0	0	0	0	0
313	[CH3][CH2][CH2][C@@H]([CH3])[CH][CH3]	C7H15	22	-275.731	-275.528	-275.517	-275.674	-275.476	-275.464	-0.454743	2	1 2 1.0 3 1.0 4 1.0 5 1.0 2 3 4 5 6 1.0 7 1.0 6 7 8 1.0 9 1.0 19 1.0 8 9 10 1.0 11 1.0 12 1.0 10 11 12 13 1.0 14 1.0 15 1.0 13 14 15 16 1.0 17 1.0 18 1.0 16 17 18 19 20 1.0 21 1.0 22 1.0 20 21 22	C -3.104300 -0.642543 0.278827 H -3.704016 0.245132 0.004818 H -3.035333 -0.641182 1.375272 H -3.692697 -1.517643 -0.022348 C -1.752674 -0.640946 -0.356074 H -1.661304 -1.025466 -1.371828 C -0.610211 0.169122 0.186604 H -0.650898 0.118365 1.287757 C 0.743809 -0.421170 -0.265732 H 0.820038 -0.336675 -1.360969 H 0.739681 -1.497908 -0.045049 C 1.985850 0.208929 0.378913 H 1.885220 0.168735 1.473227 …	43.8020 72.9107 94.6500 116.3673 155.5897 236.1011 250.1032 280.5393 320.3096 344.5692 390.7383 502.9856 516.4971 750.9582 825.4408 878.3873 889.8968 942.4470 984.0505 1001.6490 1014.2130 1054.6497 1083.9871 1106.7553 1140.4205 1189.0987 1199.2982 1271.8229 1300.0296 1338.7043 1343.7304 1364.8440 1408.9051 1422.9597 1432.8075 1438.4049 1440.8920 1504.0962 1512.0050 1517.0289 1524.0289 1527.1989 1…	0	0	0	0	0	3	0	0	0	0	0	0	1	2	0	1	0	0	0	0	0	0	0	0	0	0	0	0	0	0	0	0	0	0	0
314	[CH3][CH2][CH2][C@@H]([CH2])[CH2][CH3]	C7H15	22	-275.726	-275.522	-275.511	-275.671	-275.472	-275.461	1.53443	2	1 2 1.0 3 1.0 4 1.0 5 1.0 2 3 4 5 6 1.0 7 1.0 8 1.0 6 7 8 9 1.0 10 1.0 20 1.0 9 10 11 1.0 12 1.0 13 1.0 11 12 13 14 1.0 15 1.0 16 1.0 14 15 16 17 1.0 18 1.0 19 1.0 17 18 19 20 21 1.0 22 1.0 21 22	C 3.125761 -0.324886 -0.253294 H 3.377609 0.695507 0.056876 H 3.153681 -0.353502 -1.349827 H 3.910784 -0.994345 0.116849 C 1.749240 -0.741019 0.273833 H 1.540416 -1.776963 -0.027036 H 1.758844 -0.737510 1.373653 C 0.590431 0.161661 -0.215287 H 0.613618 0.170062 -1.316101 C -0.774365 -0.449343 0.209643 H -0.830494 -0.461738 1.308333 H -0.800303 -1.501219 -0.112087 C -1.999445 0.279868 -0.354769 H …	62.5593 84.5472 94.2340 126.6539 145.3572 231.6714 248.4935 273.0094 308.1770 362.0086 429.5288 447.3233 557.9143 753.5658 789.3197 836.1505 871.5628 900.1466 963.6756 983.1460 1017.3710 1047.2937 1061.8129 1089.6609 1111.8383 1169.3876 1206.7290 1268.3540 1295.3818 1312.2083 1340.6593 1349.8435 1382.8050 1394.5404 1411.5271 1438.3131 1440.6073 1486.7880 1509.4559 1520.1969 1524.9865 1526.8236 15…	0	0	0	0	1	2	0	0	0	0	0	0	0	3	0	1	0	0	0	0	0	0	0	0	0	0	0	0	0	0	0	0	0	0	0
315	[CH3][CH2][CH2][C@H]([CH3])[CH2][CH3]	C7H15	22	-275.737	-275.533	-275.522	-275.678	-275.479	-275.467	-2.34354	2	1 2 1.0 3 1.0 4 1.0 5 1.0 2 3 4 5 6 1.0 7 1.0 8 1.0 6 7 8 9 1.0 19 1.0 9 10 1.0 11 1.0 12 1.0 10 11 12 13 1.0 14 1.0 15 1.0 13 14 15 16 1.0 17 1.0 18 1.0 16 17 18 19 20 1.0 21 1.0 22 1.0 20 21 22	C 2.149440 -1.336982 -0.518534 H 2.535740 -0.721624 -1.339078 H 1.300270 -1.912456 -0.904058 H 2.936220 -2.045716 -0.232625 C 1.732459 -0.461798 0.687620 H 1.384661 -1.120851 1.494594 H 2.638638 0.039664 1.064453 C 0.681623 0.568596 0.383351 C -0.763771 0.320566 0.706035 H -1.237161 1.263094 1.027249 H -0.844140 -0.372422 1.556212 C -1.609768 -0.248324 -0.462908 H -1.180378 -1.205408 -0.787543 H …	28.8207 53.2119 90.5658 95.6601 133.4661 228.1429 242.9842 252.6898 307.5032 390.1927 451.6703 469.7323 746.8495 751.9398 793.0416 877.7483 881.4122 944.1996 1002.8944 1008.7323 1036.7135 1057.4981 1065.0038 1093.8606 1104.3773 1249.4415 1258.8722 1302.2225 1323.4650 1342.9191 1364.5682 1372.3470 1386.0966 1428.4365 1436.8462 1438.0886 1499.5900 1500.5629 1515.2154 1519.7711 1521.0086 1528.2984 1…	0	0	0	0	0	3	0	0	0	0	0	0	0	3	1	0	0	0	0	0	0	0	0	0	0	0	0	0	0	0	0	0	0	0	0
316	[CH3][CH2][CH][C@@H]([CH3])[CH2][CH3]	C7H15	22	-275.731	-275.528	-275.516	-275.674	-275.475	-275.464	-0.235389	2	1 2 1.0 3 1.0 4 1.0 5 1.0 2 3 4 5 6 1.0 7 1.0 8 1.0 6 7 8 9 1.0 10 1.0 19 1.0 9 10 11 1.0 12 1.0 11 12 13 1.0 14 1.0 15 1.0 13 14 15 16 1.0 17 1.0 18 1.0 16 17 18 19 20 1.0 21 1.0 22 1.0 20 21 22	C -3.003229 -0.648151 0.293752 H -3.460931 0.306579 0.012488 H -2.969667 -0.690734 1.389781 H -3.673883 -1.445205 -0.047354 C -1.604469 -0.818667 -0.309272 H -1.237431 -1.828248 -0.082131 H -1.667028 -0.757450 -1.405958 C -0.551328 0.198560 0.184905 H -0.528605 0.151930 1.286576 C 0.815351 -0.159157 -0.324449 H 0.893585 -0.517154 -1.352427 C 2.074564 0.268790 0.360423 H 1.930265 0.236840 1.451202…	28.6326 51.8274 88.5543 159.5281 221.6441 242.8805 258.9898 288.1232 300.4895 344.3291 418.9183 478.1910 538.0793 774.8150 782.6710 840.7560 890.5996 950.6436 980.4967 999.8142 1036.1489 1060.4216 1072.3060 1118.6737 1144.5479 1184.6766 1197.0001 1271.2634 1290.5854 1314.1305 1354.2283 1359.2236 1398.5042 1424.6417 1435.5478 1440.7951 1442.6622 1502.8677 1514.1451 1525.2886 1527.6435 1527.6909 15…	0	0	0	0	0	3	0	0	0	0	0	0	1	2	0	1	0	0	0	0	0	0	0	0	0	0	0	0	0	0	0	0	0	0	0
317	CCCC(C)(C)C	C7H16	23	-276.397	-276.179	-276.169	-276.342	-276.13	-276.119	-48.8942	1	1 2 1.0 3 1.0 4 1.0 5 1.0 2 3 4 5 6 1.0 16 1.0 20 1.0 6 7 1.0 8 1.0 9 1.0 7 8 9 10 1.0 11 1.0 12 1.0 10 11 12 13 1.0 14 1.0 15 1.0 13 14 15 16 17 1.0 18 1.0 19 1.0 17 18 19 20 21 1.0 22 1.0 23 1.0 21 22 23	C -1.912639 1.225231 -0.000065 H -1.765108 1.855292 -0.886119 H -1.765124 1.855376 0.885932 H -2.956526 0.887836 -0.000059 C -0.942096 0.027064 0.000000 C 0.505847 0.585862 -0.000009 H 0.620255 1.240096 0.877746 H 0.620253 1.240069 -0.877784 C 1.656971 -0.430935 0.000001 H 1.581380 -1.085209 -0.878163 H 1.581376 -1.085202 0.878169 C 3.031762 0.248169 0.000002 H 3.160170 0.884386 0.884520 H 3.8423…	65.1848 107.4418 184.9589 226.8195 252.2793 268.3163 277.6933 315.7718 334.3726 341.1763 416.5652 426.1574 497.3484 746.9002 751.3574 875.8585 889.7632 939.0589 943.6874 959.1491 970.6787 1026.8384 1044.0533 1058.8854 1125.0769 1127.6513 1243.1118 1252.9280 1285.9611 1312.9497 1342.1089 1363.1485 1416.5368 1427.8795 1428.4707 1440.4416 1458.7698 1507.6522 1512.8156 1518.4556 1519.3407 1523.7360 1…	0	0	0	0	0	4	0	0	0	0	0	0	0	2	0	0	1	0	0	0	0	0	0	0	0	0	0	0	0	0	0	0	0	0	0
318	[CH3][CH][CH2]C([CH3])([CH3])[CH3]	C7H15	22	-275.732	-275.53	-275.519	-275.679	-275.481	-275.47	-3.84556	2	1 2 1.0 3 1.0 4 1.0 5 1.0 2 3 4 5 6 1.0 15 1.0 19 1.0 6 7 1.0 8 1.0 9 1.0 7 8 9 10 1.0 11 1.0 10 11 12 1.0 13 1.0 14 1.0 12 13 14 15 16 1.0 17 1.0 18 1.0 16 17 18 19 20 1.0 21 1.0 22 1.0 20 21 22	C 1.955214 -0.984048 -0.586800 H 1.979448 -0.917741 -1.681796 H 1.734383 -2.025000 -0.319440 H 2.960767 -0.750421 -0.215897 C 0.909356 -0.022062 0.008135 C -0.488858 -0.415240 -0.552487 H -0.670525 -1.475469 -0.318947 H -0.425461 -0.370055 -1.658323 C -1.653590 0.393450 -0.076303 H -1.563913 1.477769 -0.065694 C -3.023667 -0.191763 0.026790 H -3.001461 -1.198891 0.465378 H -3.688311 0.430408 0.63…	26.0880 92.2866 117.4575 203.0770 225.9699 270.0557 272.3323 320.8139 331.7414 341.0566 407.9516 420.3603 457.3327 501.3774 742.7510 866.9866 892.9172 940.1196 945.9061 956.1189 970.8274 1000.6938 1042.0326 1062.5943 1120.8661 1155.3976 1195.8889 1243.7042 1279.4536 1315.3643 1336.4492 1424.7327 1426.1741 1427.4462 1441.0615 1457.0087 1494.5642 1505.0592 1511.1719 1515.8830 1517.7270 1518.3476 15…	0	0	0	0	0	4	0	0	0	0	0	0	1	1	0	0	1	0	0	0	0	0	0	0	0	0	0	0	0	0	0	0	0	0	0
319	[CH2][CH2][CH2]C([CH3])([CH3])[CH3]	C7H15	22	-275.724	-275.522	-275.511	-275.672	-275.475	-275.464	0.0104904	2	1 2 1.0 3 1.0 4 1.0 5 1.0 2 3 4 5 6 1.0 15 1.0 19 1.0 6 7 1.0 8 1.0 9 1.0 7 8 9 10 1.0 11 1.0 12 1.0 10 11 12 13 1.0 14 1.0 13 14 15 16 1.0 17 1.0 18 1.0 16 17 18 19 20 1.0 21 1.0 22 1.0 20 21 22	C 1.872578 1.176017 -0.278709 H 1.728443 1.999703 0.431590 H 1.741111 1.580197 -1.290114 H 2.910909 0.834020 -0.187514 C 0.884009 0.024484 -0.005482 C -0.553448 0.589962 -0.150062 H -0.653140 1.033881 -1.150614 H -0.669759 1.420666 0.562017 C -1.721931 -0.391777 0.059884 H -1.624292 -0.865897 1.054215 H -1.660527 -1.219908 -0.659512 C -3.056765 0.266934 -0.053426 H -3.944463 -0.304759 -0.305830 H…	66.5907 109.5766 122.9624 188.4934 230.8167 267.5039 276.5664 319.9937 333.7973 342.1927 415.5951 421.5490 461.2093 500.4554 737.0488 757.5659 876.7877 928.9112 941.3104 952.8280 970.6299 982.6509 1037.1299 1070.8246 1090.8857 1118.6434 1178.8316 1241.0233 1278.3588 1286.1118 1333.6913 1355.8510 1410.2192 1427.8857 1428.4852 1458.4055 1487.2327 1498.4827 1512.5742 1514.4994 1518.2448 1520.3804 15…	0	0	0	0	1	3	0	0	0	0	0	0	0	2	0	0	1	0	0	0	0	0	0	0	0	0	0	0	0	0	0	0	0	0	0
320	[CH3][CH2][CH2]C([CH3])([CH3])[CH2]	C7H15	22	-275.725	-275.522	-275.511	-275.673	-275.475	-275.464	0.00635227	2	1 2 1.0 3 1.0 4 1.0 5 1.0 2 3 4 5 6 1.0 16 1.0 20 1.0 6 7 1.0 8 1.0 9 1.0 7 8 9 10 1.0 11 1.0 12 1.0 10 11 12 13 1.0 14 1.0 15 1.0 13 14 15 16 17 1.0 18 1.0 19 1.0 17 18 19 20 21 1.0 22 1.0 21 22	C 1.956941 -1.104521 -0.438120 H 1.848925 -1.283179 -1.516404 H 1.784844 -2.054289 0.081293 H 2.991669 -0.798224 -0.247041 C 0.955976 -0.015699 0.040752 C -0.481280 -0.529674 -0.251880 H -0.615765 -1.483839 0.279812 H -0.555716 -0.768078 -1.323369 C -1.629192 0.412787 0.134733 H -1.561525 1.342325 -0.445129 H -1.522477 0.701627 1.188976 C -3.008154 -0.217508 -0.089335 H -3.130829 -1.128561 0.5095…	79.2090 113.8585 134.7631 177.7043 239.7791 252.9272 276.3604 307.4887 315.9346 339.5652 404.5404 424.7749 466.1163 558.9076 754.1023 761.0248 875.9849 888.6436 936.3394 939.6440 961.3930 991.0071 1032.9846 1057.3744 1084.8422 1126.2442 1179.9101 1251.7709 1275.9668 1312.2570 1332.1150 1358.3031 1409.4736 1420.8184 1438.7999 1440.5990 1484.8330 1508.0419 1516.9185 1521.1799 1523.8888 1529.5736 15…	0	0	0	0	1	3	0	0	0	0	0	0	0	2	0	0	1	0	0	0	0	0	0	0	0	0	0	0	0	0	0	0	0	0	0
321	[CH3][CH2][CH]C([CH3])([CH3])[CH3]	C7H15	22	-275.731	-275.528	-275.517	-275.677	-275.479	-275.468	-2.63389	2	1 2 1.0 3 1.0 4 1.0 5 1.0 2 3 4 5 6 1.0 15 1.0 19 1.0 6 7 1.0 8 1.0 7 8 9 1.0 10 1.0 11 1.0 9 10 11 12 1.0 13 1.0 14 1.0 12 13 14 15 16 1.0 17 1.0 18 1.0 16 17 18 19 20 1.0 21 1.0 22 1.0 20 21 22	C 1.816215 -1.110766 -0.686352 H 1.558090 -1.228981 -1.745147 H 1.692165 -2.086306 -0.200174 H 2.876849 -0.837675 -0.622992 C 0.928382 -0.040842 -0.015821 C -0.514273 -0.487048 -0.076296 H -0.699841 -1.552108 0.068223 C -1.688505 0.436126 0.031815 H -1.645675 1.203853 -0.756787 H -1.643980 1.008884 0.977965 C -3.037325 -0.290663 -0.044156 H -3.136164 -1.022606 0.766368 H -3.874226 0.411980 0.0349…	35.5778 63.7560 174.4131 230.2137 244.0745 268.4867 284.1115 286.6859 314.5575 333.2100 368.5920 423.6810 494.5383 510.4970 751.8435 786.0332 887.2656 925.6368 942.5710 968.6748 985.0935 1038.3841 1045.5050 1072.6651 1084.9000 1151.6197 1215.7115 1233.8519 1285.8540 1294.3867 1335.7428 1417.3858 1423.9059 1424.8355 1438.5641 1455.7318 1501.0514 1511.3474 1515.1638 1518.3100 1527.8342 1532.4078 15…	0	0	0	0	0	4	0	0	0	0	0	0	1	1	0	0	1	0	0	0	0	0	0	0	0	0	0	0	0	0	0	0	0	0	0
322	CCC(C)(C)CC	C7H16	23	-276.394	-276.176	-276.165	-276.34	-276.127	-276.117	-47.4438	1	1 2 1.0 3 1.0 4 1.0 5 1.0 2 3 4 5 6 1.0 7 1.0 8 1.0 6 7 8 9 1.0 16 1.0 20 1.0 9 10 1.0 11 1.0 12 1.0 10 11 12 13 1.0 14 1.0 15 1.0 13 14 15 16 17 1.0 18 1.0 19 1.0 17 18 19 20 21 1.0 22 1.0 23 1.0 21 22 23	C 2.625523 -0.194785 -0.000036 H 2.780838 0.431963 0.884963 H 2.780811 0.432082 -0.884954 H 3.413413 -0.956933 -0.000099 C 1.245064 -0.864143 -0.000059 H 1.176557 -1.523671 -0.877344 H 1.176580 -1.523785 0.877141 C 0.000000 0.066843 0.000016 C -1.245066 -0.864142 -0.000058 H -1.176584 -1.523781 0.877145 H -1.176557 -1.523673 -0.877340 C -2.625524 -0.194783 -0.000039 H -2.780809 0.432083 -0.884958…	62.7835 88.2267 205.4148 212.3319 236.8219 257.1111 299.0757 330.5157 333.7363 368.9221 407.9675 418.5154 513.9004 705.3581 783.1986 798.6692 847.1773 931.0606 948.7812 1008.2749 1016.5027 1016.9470 1049.0391 1064.3744 1112.4107 1129.9901 1225.0712 1249.4196 1273.5150 1314.0139 1376.2569 1386.2624 1393.5519 1428.9528 1440.3506 1441.2066 1453.8698 1506.0075 1514.4213 1516.7590 1519.6916 1534.4466 …	0	0	0	0	0	4	0	0	0	0	0	0	0	2	0	0	1	0	0	0	0	0	0	0	0	0	0	0	0	0	0	0	0	0	0
323	[CH3][CH2]C([CH2])([CH3])[CH2][CH3]	C7H15	22	-275.723	-275.52	-275.509	-275.672	-275.474	-275.463	0.451229	2	1 2 1.0 3 1.0 4 1.0 5 1.0 2 3 4 5 6 1.0 7 1.0 8 1.0 6 7 8 9 1.0 16 1.0 19 1.0 9 10 1.0 11 1.0 12 1.0 10 11 12 13 1.0 14 1.0 15 1.0 13 14 15 16 17 1.0 18 1.0 17 18 19 20 1.0 21 1.0 22 1.0 20 21 22	C 2.615637 -0.149973 -0.052668 H 2.705160 -0.033355 1.033440 H 2.790119 0.830441 -0.509421 H 3.422578 -0.812619 -0.386252 C 1.251396 -0.731901 -0.437796 H 1.188746 -0.821470 -1.532009 H 1.180402 -1.755637 -0.044245 C 0.000023 0.060406 0.060655 C -1.251360 -0.731894 -0.437884 H -1.180333 -1.755670 -0.044448 H -1.188693 -0.821326 -1.532110 C -2.615622 -0.150058 -0.052699 H -2.790104 0.830442 -0.509…	53.2446 107.5985 111.6814 193.6848 219.8974 239.9698 268.1761 308.2453 332.2620 371.2542 406.9442 416.4735 446.9953 556.0285 717.7734 787.2156 802.4795 869.2216 908.9758 959.6920 1009.3247 1019.1680 1036.6448 1062.7937 1095.4733 1109.6866 1172.9092 1248.3753 1254.4181 1305.4234 1364.9817 1373.2567 1389.4344 1435.7928 1436.7360 1441.7225 1487.3246 1506.5950 1517.2313 1525.5203 1527.0819 1530.7025 …	0	0	0	0	1	3	0	0	0	0	0	0	0	2	0	0	1	0	0	0	0	0	0	0	0	0	0	0	0	0	0	0	0	0	0
324	[CH3][CH]C([CH3])([CH3])[CH2][CH3]	C7H15	22	-275.728	-275.525	-275.514	-275.675	-275.477	-275.466	-1.54733	2	1 2 1.0 3 1.0 4 1.0 5 1.0 2 3 4 5 6 1.0 7 1.0 6 7 8 1.0 15 1.0 19 1.0 8 9 1.0 10 1.0 11 1.0 9 10 11 12 1.0 13 1.0 14 1.0 12 13 14 15 16 1.0 17 1.0 18 1.0 16 17 18 19 20 1.0 21 1.0 22 1.0 20 21 22	C 2.643456 -0.323122 -0.124474 H 2.933311 0.581966 0.438636 H 2.756625 -0.063975 -1.187362 H 3.384963 -1.094922 0.106148 C 1.261346 -0.786288 0.207207 H 1.158836 -1.686884 0.811044 C 0.021352 0.066359 0.050740 C -1.199910 -0.894290 -0.030743 H -1.182397 -1.537827 0.860627 H -1.045376 -1.563729 -0.888129 C -2.588054 -0.251944 -0.143161 H -2.688435 0.358943 -1.047040 H -3.359796 -1.029034 -0.189641…	62.7364 84.3890 87.7312 203.1336 220.5010 260.1077 271.6102 293.3282 317.7894 361.2542 371.5344 408.8017 494.5983 527.0246 708.9479 790.7883 857.9238 918.7060 943.9117 997.7208 1006.8286 1029.5194 1045.6057 1076.7115 1094.4780 1130.4238 1208.7692 1227.4892 1272.3215 1337.0240 1386.1648 1392.4941 1418.9473 1438.1532 1441.8867 1448.6298 1503.2003 1511.1905 1513.7023 1514.1748 1523.1120 1537.2194 15…	0	0	0	0	0	4	0	0	0	0	0	0	1	1	0	0	1	0	0	0	0	0	0	0	0	0	0	0	0	0	0	0	0	0	0
325	[CH2][CH2]C([CH3])([CH3])[CH2][CH3]	C7H15	22	-275.723	-275.52	-275.51	-275.672	-275.474	-275.464	0.115738	2	1 2 1.0 3 1.0 4 1.0 2 3 4 5 1.0 6 1.0 7 1.0 5 6 7 8 1.0 15 1.0 19 1.0 8 9 1.0 10 1.0 11 1.0 9 10 11 12 1.0 13 1.0 14 1.0 12 13 14 15 16 1.0 17 1.0 18 1.0 16 17 18 19 20 1.0 21 1.0 22 1.0 20 21 22	C -2.632542 -0.000042 0.232236 H -3.122547 -0.926171 -0.051487 H -3.122555 0.926168 -0.051209 C -1.294797 -0.000135 0.890385 H -1.207473 0.881597 1.542138 H -1.207466 -0.882061 1.541875 C -0.042429 0.000012 -0.061222 C 1.210743 -0.000122 0.853045 H 1.153350 -0.877846 1.513134 H 1.153355 0.877412 1.513386 C 2.578041 -0.000028 0.157126 H 2.719321 0.885060 -0.472801 H 3.381359 -0.000142 0.903004 H 2…	81.9021 109.4920 134.4715 205.1841 219.2944 267.2681 282.2752 309.1825 324.0635 365.5883 404.9145 411.1563 457.2046 563.0854 721.9570 782.3890 797.6408 849.1178 950.2402 951.7530 999.9955 1013.1233 1029.8628 1072.0638 1101.6078 1120.5433 1212.1152 1239.7384 1240.4702 1304.0608 1339.6410 1370.9089 1389.9296 1427.0622 1439.5676 1449.2735 1490.6134 1506.8277 1515.2251 1516.0115 1521.8901 1537.7838 1…	0	0	0	0	1	3	0	0	0	0	0	0	0	2	0	0	1	0	0	0	0	0	0	0	0	0	0	0	0	0	0	0	0	0	0
326	CC[C@@H](C)C(C)C	C7H16	23	-276.395	-276.176	-276.166	-276.339	-276.126	-276.116	-46.6202	1	1 2 1.0 3 1.0 4 1.0 5 1.0 2 3 4 5 6 1.0 7 1.0 16 1.0 6 7 8 1.0 9 1.0 20 1.0 8 9 10 1.0 11 1.0 12 1.0 10 11 12 13 1.0 14 1.0 15 1.0 13 14 15 16 17 1.0 18 1.0 19 1.0 17 18 19 20 21 1.0 22 1.0 23 1.0 21 22 23	C 1.559638 -1.200371 0.785153 H 0.818242 -1.962030 1.050208 H 1.741977 -0.585821 1.674918 H 2.496350 -1.720466 0.551737 C 1.109168 -0.344307 -0.410503 H 0.991617 -1.022821 -1.269578 C -0.276286 0.336752 -0.215123 H -0.437752 0.951747 -1.115389 C -1.418734 -0.701798 -0.177117 H -1.369945 -1.271130 0.761522 H -1.256024 -1.430478 -0.983968 C -2.825275 -0.109381 -0.330012 H -2.912057 0.469000 -1.2585…	50.9895 84.6912 201.4630 207.8794 230.1656 244.2650 256.3924 296.8276 321.0266 337.4554 431.6558 461.3774 559.1977 754.9301 794.4790 859.4744 929.7506 938.5609 974.0218 981.8261 989.0787 1044.8134 1060.9825 1086.7150 1154.4510 1193.8215 1206.3012 1223.9100 1310.5053 1328.9289 1353.7792 1381.8753 1405.6939 1406.9390 1429.9393 1440.7196 1443.6492 1451.9440 1513.6440 1518.8474 1521.9326 1527.3938 15…	0	0	0	0	0	4	0	0	0	0	0	0	0	1	0	2	0	0	0	0	0	0	0	0	0	0	0	0	0	0	0	0	0	0	0
327	[CH3][CH2][C@@H]([CH3])C([CH3])[CH3]	C7H15	22	-275.735	-275.532	-275.521	-275.678	-275.48	-275.469	-3.08121	2	1 2 1.0 3 1.0 4 1.0 5 1.0 2 3 4 5 6 1.0 15 1.0 6 7 1.0 8 1.0 19 1.0 7 8 9 1.0 10 1.0 11 1.0 9 10 11 12 1.0 13 1.0 14 1.0 12 13 14 15 16 1.0 17 1.0 18 1.0 16 17 18 19 20 1.0 21 1.0 22 1.0 20 21 22	C -1.612111 1.233104 0.732973 H -0.813838 1.925378 1.022034 H -2.006166 0.796122 1.669723 H -2.432032 1.826621 0.307023 C -1.146272 0.182019 -0.231158 C 0.257859 -0.375603 -0.144870 H 0.400746 -1.029430 -1.019245 C 1.344592 0.724425 -0.224824 H 1.330766 1.324299 0.695507 H 1.082378 1.409896 -1.041573 C 2.764600 0.193940 -0.456429 H 2.817533 -0.409008 -1.371693 H 3.476804 1.020342 -0.563101 H 3.11…	12.3230 78.9882 103.4556 118.5336 170.9378 208.0361 223.8713 264.5176 312.6981 329.0175 418.0576 445.4857 511.6147 743.1037 790.4135 854.9199 944.9862 953.5385 980.5578 986.4563 996.0625 1038.4960 1064.6649 1095.5475 1128.4147 1181.2177 1244.0532 1304.4982 1310.3101 1354.2461 1365.7683 1409.7594 1425.8346 1427.8353 1441.0588 1447.1541 1500.8333 1506.9156 1512.6733 1515.7314 1525.9337 1526.0444 15…	0	0	0	0	0	4	0	0	0	0	0	0	0	1	1	1	0	0	0	0	0	0	0	0	0	0	0	0	0	0	0	0	0	0	0
328	[CH3][CH2][C@H]([CH3])[CH]([CH3])[CH3]	C7H15	22	-275.736	-275.532	-275.521	-275.679	-275.48	-275.469	-3.02308	2	1 2 1.0 3 1.0 4 1.0 5 1.0 2 3 4 5 6 1.0 7 1.0 15 1.0 6 7 8 1.0 19 1.0 8 9 1.0 10 1.0 11 1.0 9 10 11 12 1.0 13 1.0 14 1.0 12 13 14 15 16 1.0 17 1.0 18 1.0 16 17 18 19 20 1.0 21 1.0 22 1.0 20 21 22	C 2.097322 0.173744 1.025407 H 1.783421 0.507832 2.020518 H 2.484051 1.046967 0.486047 H 2.927059 -0.533607 1.148900 C 0.923926 -0.480778 0.259999 H 0.592489 -1.342921 0.857055 C -0.253336 0.459833 0.126867 C -1.563213 0.116723 0.777595 H -2.119604 1.037608 1.005727 H -1.381850 -0.384214 1.740032 C -2.472914 -0.798160 -0.077682 H -1.982050 -1.754953 -0.290547 H -3.414720 -1.011970 0.442498 H -2.7…	36.3221 43.4937 91.5237 147.4041 216.5772 232.8612 248.6085 265.2766 294.0545 335.4920 413.7037 475.7089 529.5405 698.3005 792.5032 865.3887 932.4823 934.5428 959.6079 990.5486 1002.7853 1041.2264 1063.3376 1100.3947 1104.4462 1185.4011 1248.5013 1265.7494 1351.9074 1354.6612 1357.5444 1400.5092 1418.7125 1428.3281 1434.6312 1445.7106 1501.4691 1510.7699 1514.6436 1516.7643 1525.3321 1527.7439 15…	0	0	0	0	0	4	0	0	0	0	0	0	0	1	1	1	0	0	0	0	0	0	0	0	0	0	0	0	0	0	0	0	0	0	0
329	[CH2][CH2][C@@H]([CH3])[CH]([CH3])[CH3]	C7H15	22	-275.723	-275.52	-275.509	-275.671	-275.473	-275.462	1.3214	2	1 2 1.0 3 1.0 4 1.0 5 1.0 2 3 4 5 6 1.0 7 1.0 15 1.0 6 7 8 1.0 9 1.0 19 1.0 8 9 10 1.0 11 1.0 12 1.0 10 11 12 13 1.0 14 1.0 13 14 15 16 1.0 17 1.0 18 1.0 16 17 18 19 20 1.0 21 1.0 22 1.0 20 21 22	C 1.496112 -1.251505 0.714675 H 0.755671 -2.034239 0.912934 H 1.658334 -0.699168 1.647937 H 2.440192 -1.749033 0.462784 C 1.061698 -0.317533 -0.427254 H 0.959282 -0.937024 -1.331907 C -0.325799 0.347385 -0.207885 H -0.489346 1.000969 -1.079780 C -1.472892 -0.693262 -0.219249 H -1.433110 -1.307874 0.690825 H -1.287281 -1.396686 -1.054557 C -2.832923 -0.095940 -0.360110 H -3.000101 0.737041 -1.0383…	63.0104 109.1008 123.6504 201.9603 214.7703 244.6742 255.5120 286.8426 308.6326 334.6272 422.9369 454.6886 481.3043 562.8303 764.5144 828.7154 863.4661 935.9437 939.4436 974.6295 977.4708 1028.0722 1054.6200 1083.2957 1133.2244 1172.4384 1189.3231 1216.2793 1259.3816 1314.8518 1352.5483 1373.3147 1403.0267 1404.6134 1429.8622 1439.0132 1451.5987 1486.9233 1497.5949 1518.3276 1521.1746 1528.8268 1…	0	0	0	0	1	3	0	0	0	0	0	0	0	1	0	2	0	0	0	0	0	0	0	0	0	0	0	0	0	0	0	0	0	0	0
330	[CH3][CH2][C@@H]([CH2])[CH]([CH3])[CH3]	C7H15	22	-275.724	-275.521	-275.51	-275.672	-275.474	-275.463	0.667637	2	1 2 1.0 3 1.0 4 1.0 5 1.0 2 3 4 5 6 1.0 7 1.0 16 1.0 6 7 8 1.0 9 1.0 20 1.0 8 9 10 1.0 11 1.0 12 1.0 10 11 12 13 1.0 14 1.0 15 1.0 13 14 15 16 17 1.0 18 1.0 19 1.0 17 18 19 20 21 1.0 22 1.0 21 22	C -1.523170 1.295427 0.640180 H -0.790737 2.102116 0.752773 H -1.636963 0.805290 1.614689 H -2.484797 1.757136 0.386134 C -1.109159 0.284861 -0.439417 H -0.997467 0.832015 -1.388260 C 0.285798 -0.381723 -0.163607 H 0.437666 -1.080745 -1.003098 C 1.433821 0.650625 -0.216412 H 1.385697 1.296790 0.670728 H 1.283907 1.308232 -1.083954 C 2.824000 0.011018 -0.299606 H 2.921110 -0.606005 -1.201659 H 3.6…	78.4902 102.9832 143.8617 194.2558 225.1203 232.5720 249.6759 274.7817 310.5656 339.4724 430.4449 442.6416 471.2074 605.4728 775.4588 797.8736 858.2879 938.4440 951.3116 972.2482 978.3922 1000.8327 1054.0771 1086.3956 1107.9764 1185.4537 1196.7708 1208.1856 1295.1612 1306.7629 1330.6727 1380.0686 1395.8742 1403.8367 1428.5030 1439.1369 1446.7472 1489.5272 1519.0686 1519.8290 1524.6765 1527.2365 1…	0	0	0	0	1	3	0	0	0	0	0	0	0	1	0	2	0	0	0	0	0	0	0	0	0	0	0	0	0	0	0	0	0	0	0
331	[CH3][CH2][C@@H]([CH3])[C@H]([CH3])[CH2]	C7H15	22	-275.723	-275.52	-275.509	-275.67	-275.472	-275.461	1.48827	2	1 2 1.0 3 1.0 4 1.0 5 1.0 2 3 4 5 6 1.0 7 1.0 16 1.0 6 7 8 1.0 9 1.0 19 1.0 8 9 10 1.0 11 1.0 12 1.0 10 11 12 13 1.0 14 1.0 15 1.0 13 14 15 16 17 1.0 18 1.0 17 18 19 20 1.0 21 1.0 22 1.0 20 21 22	C 1.635803 -1.176784 0.729495 H 0.919885 -1.970989 0.965391 H 1.794767 -0.581432 1.635260 H 2.589582 -1.655688 0.479115 C 1.155081 -0.301668 -0.443635 H 1.029648 -0.979620 -1.311897 C -0.247284 0.348631 -0.226165 H -0.428107 0.968532 -1.119111 C -1.369668 -0.708415 -0.181231 H -1.288442 -1.294330 0.744814 H -1.216623 -1.418885 -1.006223 C -2.787234 -0.132367 -0.285769 H -2.906442 0.461838 -1.2005…	71.9688 89.8331 128.6683 199.5980 212.4668 236.7306 258.2399 282.9430 310.8634 341.6914 430.1908 439.2486 494.1632 589.6871 763.5233 799.4898 864.7652 919.3984 951.8107 982.9401 984.7775 1037.7957 1047.3504 1072.6099 1132.9424 1162.3041 1197.3259 1214.3029 1296.6357 1313.6610 1321.5591 1363.2390 1396.5734 1405.3309 1435.2651 1438.7411 1441.6977 1487.2970 1514.2043 1524.2723 1528.5364 1530.3489 15…	0	0	0	0	1	3	0	0	0	0	0	0	0	1	0	2	0	0	0	0	0	0	0	0	0	0	0	0	0	0	0	0	0	0	0
332	[CH3][CH][C@@H]([CH3])[CH]([CH3])[CH3]	C7H15	22	-275.729	-275.526	-275.515	-275.675	-275.477	-275.466	-1.47698	2	1 2 1.0 3 1.0 4 1.0 5 1.0 2 3 4 5 6 1.0 7 1.0 15 1.0 6 7 8 1.0 9 1.0 19 1.0 8 9 10 1.0 11 1.0 10 11 12 1.0 13 1.0 14 1.0 12 13 14 15 16 1.0 17 1.0 18 1.0 16 17 18 19 20 1.0 21 1.0 22 1.0 20 21 22	C 1.375969 -1.209295 0.894988 H 0.537417 -1.878687 1.117797 H 1.533726 -0.567501 1.770179 H 2.276545 -1.822915 0.773731 C 1.108499 -0.379993 -0.370666 H 1.041742 -1.083386 -1.214982 C -0.260217 0.361373 -0.332687 H -0.293151 0.976399 -1.256266 C -1.401899 -0.615768 -0.398838 H -1.211530 -1.563873 -0.899907 C -2.826447 -0.229535 -0.163662 H -3.181495 0.519632 -0.895186 H -3.492631 -1.095022 -0.242…	47.9843 85.2840 98.6544 192.7399 229.7809 244.3444 258.5569 276.3102 309.2951 331.9938 391.2880 446.1613 520.3296 569.8447 755.7251 857.4020 932.3150 939.7577 975.2633 986.6148 991.5299 1024.3300 1081.0680 1094.7623 1135.9127 1170.1387 1206.9716 1220.5939 1299.5975 1328.3921 1384.1860 1387.2091 1399.1773 1428.0712 1436.6978 1442.8621 1449.4513 1504.8295 1515.0439 1517.7649 1521.9336 1529.0350 153…	0	0	0	0	0	4	0	0	0	0	0	0	1	0	0	2	0	0	0	0	0	0	0	0	0	0	0	0	0	0	0	0	0	0	0
333	CC(C)CC(C)C	C7H16	23	-276.398	-276.18	-276.169	-276.342	-276.129	-276.118	-48.2835	1	1 2 1.0 3 1.0 4 1.0 5 1.0 2 3 4 5 6 1.0 7 1.0 16 1.0 6 7 8 1.0 9 1.0 10 1.0 8 9 10 11 1.0 12 1.0 20 1.0 11 12 13 1.0 14 1.0 15 1.0 13 14 15 16 17 1.0 18 1.0 19 1.0 17 18 19 20 21 1.0 22 1.0 23 1.0 21 22 23	C 2.458858 0.825426 0.545728 H 2.237278 1.450244 1.419338 H 2.656293 1.496148 -0.300972 H 3.383132 0.273089 0.753563 C 1.297200 -0.129913 0.230507 H 1.154624 -0.773954 1.110315 C 0.000000 0.672608 0.000000 H 0.157234 1.336543 -0.864280 H -0.157234 1.336542 0.864281 C -1.297199 -0.129913 -0.230507 H -1.154624 -0.773954 -1.110315 C -1.651929 -1.031325 0.961966 H -1.777045 -0.437014 1.877033 H -2.59…	49.5181 113.3807 176.1773 231.1079 231.2367 244.2362 258.5832 307.1674 345.0781 395.6395 418.9009 460.5147 467.9315 814.7719 821.2228 886.1617 934.4639 939.1325 943.5791 974.7018 976.3541 1002.6463 1061.0344 1100.6412 1188.0669 1199.0502 1206.2006 1212.2186 1294.4285 1325.0243 1368.5226 1378.7344 1396.9787 1414.7273 1427.9525 1431.5158 1446.7515 1450.9891 1507.4974 1517.5192 1520.3984 1523.7994 1…	0	0	0	0	0	4	0	0	0	0	0	0	0	1	0	2	0	0	0	0	0	0	0	0	0	0	0	0	0	0	0	0	0	0	0
334	[CH3][C@H]([CH2])[CH2][CH]([CH3])[CH3]	C7H15	22	-275.726	-275.523	-275.512	-275.672	-275.474	-275.463	0.411226	2	1 2 1.0 3 1.0 4 1.0 5 1.0 2 3 4 5 6 1.0 7 1.0 16 1.0 6 7 8 1.0 9 1.0 10 1.0 8 9 10 11 1.0 12 1.0 19 1.0 11 12 13 1.0 14 1.0 15 1.0 13 14 15 16 17 1.0 18 1.0 17 18 19 20 1.0 21 1.0 22 1.0 20 21 22	C 2.519968 -0.647583 -0.630134 H 2.324410 -1.060641 -1.628008 H 2.702290 -1.484835 0.054158 H 3.437366 -0.051104 -0.682413 C 1.321628 0.209294 -0.145550 H 1.193258 1.012780 -0.885538 C 0.036758 -0.645942 -0.113950 H 0.185991 -1.456872 0.615432 H -0.088790 -1.136487 -1.091104 C -1.264476 0.102217 0.238197 H -1.102769 0.621151 1.194622 C -1.635823 1.159660 -0.812503 H -1.777713 0.698561 -1.799252 H…	48.0218 113.7400 139.3319 170.1487 228.6465 244.6316 249.8785 293.2649 345.8208 371.4229 411.2256 449.4398 457.4437 551.0528 816.8451 844.5717 880.2915 929.5206 939.8524 956.6119 975.4040 998.8324 1033.6704 1060.2027 1131.5604 1184.7574 1199.9251 1207.0098 1287.2969 1315.8828 1345.8376 1376.2396 1395.7131 1405.2763 1425.8295 1429.7291 1448.0730 1486.0962 1510.6746 1519.3644 1522.9010 1525.3509 15…	0	0	0	0	1	3	0	0	0	0	0	0	0	1	0	2	0	0	0	0	0	0	0	0	0	0	0	0	0	0	0	0	0	0	0
335	[CH3][CH]([CH3])[CH][CH]([CH3])[CH3]	C7H15	22	-275.732	-275.529	-275.518	-275.676	-275.478	-275.467	-1.86091	2	1 2 1.0 3 1.0 4 1.0 5 1.0 2 3 4 5 6 1.0 7 1.0 15 1.0 6 7 8 1.0 9 1.0 8 9 10 1.0 11 1.0 19 1.0 10 11 12 1.0 13 1.0 14 1.0 12 13 14 15 16 1.0 17 1.0 18 1.0 16 17 18 19 20 1.0 21 1.0 22 1.0 20 21 22	C -2.307320 -1.003193 -0.533652 H -1.906409 -2.011149 -0.688310 H -2.519316 -0.572912 -1.521029 H -3.260605 -1.093179 0.000895 C -1.314489 -0.120582 0.241992 H -1.131115 -0.593155 1.220761 C 0.000001 0.000015 -0.472900 H -0.000005 0.000021 -1.563384 C 1.314490 0.120588 0.241992 H 1.131119 0.593160 1.220763 C 1.932994 -1.270867 0.525517 H 2.161316 -1.791438 -0.412456 H 2.865260 -1.176926 1.097321 …	26.0276 32.1889 168.1457 232.9392 233.3457 247.5187 253.5967 270.7053 289.8461 347.6647 373.8926 438.5216 472.9474 527.2185 826.9818 842.5909 923.4089 935.4593 937.9219 964.6012 967.3192 1023.0335 1098.9964 1100.6201 1127.7441 1198.4844 1199.4287 1208.0457 1289.4517 1343.6888 1345.4132 1373.1254 1417.5617 1418.6934 1431.1025 1441.9923 1450.3124 1516.2746 1516.7720 1519.2522 1519.3853 1531.0710 15…	0	0	0	0	0	4	0	0	0	0	0	0	1	0	0	2	0	0	0	0	0	0	0	0	0	0	0	0	0	0	0	0	0	0	0
336	[CH3][CH]([CH3])[CH2]C([CH3])[CH3]	C7H15	22	-275.738	-275.535	-275.524	-275.681	-275.483	-275.472	-4.99148	2	1 2 1.0 3 1.0 4 1.0 5 1.0 2 3 4 5 6 1.0 7 1.0 15 1.0 6 7 8 1.0 9 1.0 10 1.0 8 9 10 11 1.0 19 1.0 11 12 1.0 13 1.0 14 1.0 12 13 14 15 16 1.0 17 1.0 18 1.0 16 17 18 19 20 1.0 21 1.0 22 1.0 20 21 22	C 2.559273 0.549173 -0.517144 H 2.497127 1.542805 -0.977294 H 2.765685 -0.175108 -1.316271 H 3.420355 0.546646 0.161878 C 1.264329 0.191948 0.225191 H 1.103069 0.951367 1.004797 C 0.048965 0.242010 -0.740607 H 0.191995 -0.530547 -1.509932 H 0.088083 1.210435 -1.271523 C -1.295975 0.072359 -0.088453 C -1.862436 1.202148 0.717806 H -2.451689 1.898874 0.091768 H -2.542788 0.844030 1.501964 H -1.0804…	36.4241 77.9244 99.2882 116.9720 157.7196 230.0256 253.5815 295.2004 305.9832 373.4834 391.8422 418.7167 466.1152 781.6937 814.6208 887.7024 936.6983 945.1573 955.8907 974.4373 994.7195 1016.8251 1052.4603 1102.5231 1138.9595 1198.5077 1243.8425 1292.0297 1317.4444 1344.1366 1382.1685 1391.4851 1426.6378 1428.0820 1443.6189 1446.9950 1500.3486 1501.8415 1509.3158 1513.5869 1518.6248 1524.1338 152…	0	0	0	0	0	4	0	0	0	0	0	0	0	1	1	1	0	0	0	0	0	0	0	0	0	0	0	0	0	0	0	0	0	0	0
337	CCC(CC)CC	C7H16	23	-276.394	-276.175	-276.165	-276.338	-276.124	-276.114	-45.6095	1	1 2 1.0 3 1.0 4 1.0 5 1.0 2 3 4 5 6 1.0 7 1.0 8 1.0 6 7 8 9 1.0 10 1.0 17 1.0 9 10 11 1.0 12 1.0 13 1.0 11 12 13 14 1.0 15 1.0 16 1.0 14 15 16 17 18 1.0 19 1.0 20 1.0 18 19 20 21 1.0 22 1.0 23 1.0 21 22 23	C 0.000003 2.082434 -0.489090 H -0.883981 1.965103 -1.126382 H 0.883992 1.965104 -1.126376 H 0.000002 3.113496 -0.117173 C 0.000000 1.088895 0.680677 H 0.872342 1.288217 1.315981 H -0.872346 1.288218 1.315976 C 0.000000 -0.409180 0.293906 H 0.000000 -0.971444 1.242521 C -1.263859 -0.840092 -0.481830 H -1.170674 -1.910384 -0.712968 H -1.292437 -0.328995 -1.454369 C -2.589674 -0.610606 0.253221 H -…	61.4736 85.5950 130.3170 199.3104 221.6797 228.8687 267.9565 293.3740 330.9842 396.2825 464.5871 534.6795 735.7971 759.7815 802.5298 845.1266 915.1455 916.0594 1021.3356 1027.8771 1033.2371 1041.1625 1068.0141 1078.9355 1173.4970 1188.2455 1197.8071 1290.7226 1303.1416 1321.5947 1330.8639 1381.2135 1400.1952 1410.0619 1417.2082 1439.0309 1440.5006 1446.2956 1511.7055 1518.1569 1526.2542 1530.3272…	0	0	0	0	0	3	0	0	0	0	0	0	0	3	0	1	0	0	0	0	0	0	0	0	0	0	0	0	0	0	0	0	0	0	0
338	[CH3][CH][CH]([CH2][CH3])[CH2][CH3]	C7H15	22	-275.73	-275.527	-275.515	-275.675	-275.476	-275.465	-1.01693	2	1 2 1.0 3 1.0 4 1.0 5 1.0 2 3 4 5 6 1.0 7 1.0 6 7 8 1.0 9 1.0 16 1.0 8 9 10 1.0 11 1.0 12 1.0 10 11 12 13 1.0 14 1.0 15 1.0 13 14 15 16 17 1.0 18 1.0 19 1.0 17 18 19 20 1.0 21 1.0 22 1.0 20 21 22	C 0.143325 2.149737 -0.388269 H -0.351624 1.889447 -1.332589 H 1.197511 2.364697 -0.640998 H -0.287286 3.094630 -0.034658 C 0.011635 1.070806 0.639052 H 0.094273 1.356996 1.684699 C -0.031452 -0.393953 0.288019 H -0.051002 -0.962599 1.230273 C -1.312313 -0.779572 -0.498129 H -1.245605 -1.842256 -0.769647 H -1.336347 -0.226443 -1.447439 C -2.612088 -0.532530 0.273176 H -2.725160 0.526054 0.532764 …	53.3706 82.1554 93.8037 120.1243 189.6254 205.4806 229.2880 263.8855 276.2705 363.5168 392.1999 500.8099 549.8646 754.8430 781.4531 847.8451 906.8790 922.0123 1001.5280 1029.7681 1035.5326 1048.3432 1050.2513 1098.1188 1103.8870 1184.6302 1192.6101 1288.5270 1302.4784 1320.6667 1376.6586 1383.0450 1396.8100 1409.4530 1435.5778 1438.7237 1441.0023 1506.1786 1508.4500 1522.5142 1523.9761 1526.6358 …	0	0	0	0	0	3	0	0	0	0	0	0	1	2	0	1	0	0	0	0	0	0	0	0	0	0	0	0	0	0	0	0	0	0	0
339	[CH3][CH2][CH]([CH2][CH3])[CH2][CH2]	C7H15	22	-275.723	-275.519	-275.508	-275.669	-275.471	-275.46	2.37681	2	1 2 1.0 3 1.0 4 1.0 5 1.0 2 3 4 5 6 1.0 7 1.0 8 1.0 6 7 8 9 1.0 10 1.0 17 1.0 9 10 11 1.0 12 1.0 13 1.0 11 12 13 14 1.0 15 1.0 16 1.0 14 15 16 17 18 1.0 19 1.0 20 1.0 18 19 20 21 1.0 22 1.0 21 22	C 0.005294 2.077924 0.471844 H 0.930429 1.971312 1.050006 H -0.835244 1.961449 1.165365 H -0.025960 3.105766 0.092538 C -0.067633 1.076856 -0.688719 H -0.983155 1.268073 -1.263508 H 0.765673 1.268608 -1.376867 C -0.056902 -0.418083 -0.293005 H -0.063629 -0.988908 -1.236064 C 1.203520 -0.847477 0.485472 H 1.113434 -1.918092 0.716738 H 1.229705 -0.335220 1.457434 C 2.527553 -0.612015 -0.250503 H 2.…	67.5504 91.1599 122.9098 140.3381 201.2764 226.9660 247.1976 284.1768 312.9876 399.1059 442.7343 497.0811 527.5530 743.4341 768.2697 817.5543 851.3094 923.1587 942.4452 1018.9828 1031.4058 1033.9449 1057.7336 1094.3149 1133.5994 1181.4223 1188.1055 1231.8603 1293.9513 1317.3164 1324.1670 1378.9030 1388.1494 1406.4223 1416.0644 1440.0879 1443.3241 1487.3847 1498.8390 1514.7881 1522.3040 1531.0117 …	0	0	0	0	1	2	0	0	0	0	0	0	0	3	0	1	0	0	0	0	0	0	0	0	0	0	0	0	0	0	0	0	0	0	0
340	[CH3][CH2]C([CH2][CH3])[CH2][CH3]	C7H15	22	-275.736	-275.531	-275.52	-275.677	-275.477	-275.466	-1.35112	2	1 2 1.0 3 1.0 4 1.0 5 1.0 2 3 4 5 6 1.0 7 1.0 8 1.0 6 7 8 9 1.0 16 1.0 9 10 1.0 11 1.0 12 1.0 10 11 12 13 1.0 14 1.0 15 1.0 13 14 15 16 17 1.0 18 1.0 19 1.0 17 18 19 20 1.0 21 1.0 22 1.0 20 21 22	C -2.632947 0.000008 -0.089136 H -2.715622 -0.884941 -0.730543 H -2.715616 0.884965 -0.730532 H -3.487751 0.000007 0.598243 C -1.295501 0.000000 0.687319 H -1.278941 0.879188 1.347869 H -1.278946 -0.879197 1.347858 C -0.088763 0.000002 -0.210880 C 0.505280 -1.310694 -0.644672 H 1.039441 -1.184746 -1.596799 H -0.299650 -2.037645 -0.837016 C 1.475550 -1.942061 0.382070 H 0.980822 -2.099071 1.347533…	27.0931 50.3307 59.4567 115.4967 211.0051 219.1309 251.2153 284.2081 292.5870 390.8183 416.8277 544.3654 701.2437 779.5884 795.2543 796.3659 923.0720 925.6422 979.3715 1034.5731 1043.3202 1060.0331 1060.7212 1084.0072 1088.7879 1247.9712 1250.3238 1296.7984 1333.5231 1336.8623 1362.5978 1379.1546 1389.4986 1427.7409 1428.6399 1433.4527 1501.7514 1503.7652 1520.4309 1523.7684 1527.5658 1529.7998 1…	0	0	0	0	0	3	0	0	0	0	0	0	0	3	1	0	0	0	0	0	0	0	0	0	0	0	0	0	0	0	0	0	0	0	0
341	CC(C)C(C)(C)C	C7H16	23	-276.393	-276.176	-276.165	-276.341	-276.129	-276.118	-48.3022	1	1 2 1.0 3 1.0 4 1.0 5 1.0 2 3 4 5 6 1.0 12 1.0 16 1.0 6 7 1.0 8 1.0 20 1.0 7 8 9 1.0 10 1.0 11 1.0 9 10 11 12 13 1.0 14 1.0 15 1.0 13 14 15 16 17 1.0 18 1.0 19 1.0 17 18 19 20 21 1.0 22 1.0 23 1.0 21 22 23	C -0.798811 -0.000022 1.534501 H -0.343729 0.886056 1.991122 H -0.343750 -0.886124 1.991094 H -1.860649 -0.000013 1.809868 C -0.645793 0.000000 -0.000112 C 0.858144 0.000000 -0.447874 H 0.835810 0.000001 -1.549201 C 1.641965 1.253142 -0.015898 H 1.726045 1.322460 1.075365 H 2.661991 1.213896 -0.416080 H 1.186547 2.179992 -0.377465 C -1.359430 -1.245473 -0.569560 H -1.233034 -1.313321 -1.657727 H …	29.6138 193.8509 232.2294 233.4891 252.8923 264.8010 295.2923 303.1090 354.8529 375.0211 393.3631 441.4566 456.6545 523.0092 684.7419 840.0593 930.4141 936.3826 940.0028 940.9944 969.7913 975.8682 1026.5983 1042.1695 1119.8464 1136.0443 1198.7452 1248.0109 1257.3142 1286.2506 1369.6067 1380.4003 1424.7850 1427.8908 1432.9052 1446.6516 1463.4294 1509.6730 1515.0760 1517.6004 1520.7094 1534.2050 15…	0	0	0	0	0	5	0	0	0	0	0	0	0	0	0	1	1	0	0	0	0	0	0	0	0	0	0	0	0	0	0	0	0	0	0
342	[CH3][C@@H]([CH2])C([CH3])([CH3])[CH3]	C7H15	22	-275.722	-275.52	-275.509	-275.673	-275.475	-275.465	-0.517826	2	1 2 1.0 3 1.0 4 1.0 5 1.0 2 3 4 5 6 1.0 12 1.0 16 1.0 6 7 1.0 8 1.0 20 1.0 7 8 9 1.0 10 1.0 11 1.0 9 10 11 12 13 1.0 14 1.0 15 1.0 13 14 15 16 17 1.0 18 1.0 19 1.0 17 18 19 20 21 1.0 22 1.0 21 22	C 0.730997 -0.036924 1.545076 H 0.231628 -0.908520 1.983233 H 0.286127 0.864044 1.982864 H 1.783050 -0.074113 1.853595 C 0.621795 -0.023067 0.008935 C -0.886852 0.089529 -0.462148 H -0.833545 0.094396 -1.563337 C -1.760723 -1.111236 -0.048790 H -1.868841 -1.173263 1.040468 H -2.766118 -1.003793 -0.470306 H -1.353981 -2.063491 -0.402308 C 1.405503 1.186851 -0.538553 H 1.333262 1.245712 -1.632315 H…	63.9668 138.2636 208.6344 235.9735 256.4332 264.7835 285.2363 288.2419 347.3811 367.0221 381.7009 416.2517 444.8099 483.9336 549.6817 693.3894 839.2251 909.8630 938.1700 942.1911 945.1770 970.1791 1015.2450 1043.6329 1067.6573 1136.1580 1182.5842 1230.8886 1253.0959 1259.7799 1347.1140 1368.8334 1424.8939 1426.0011 1434.6726 1456.5262 1490.7815 1510.4247 1516.8326 1519.8879 1526.5046 1532.2713 15…	0	0	0	0	1	4	0	0	0	0	0	0	0	0	0	1	1	0	0	0	0	0	0	0	0	0	0	0	0	0	0	0	0	0	0
343	[CH3][CH]([CH3])C([CH2])([CH3])[CH3]	C7H15	22	-275.721	-275.519	-275.508	-275.672	-275.474	-275.463	0.141552	2	1 2 1.0 3 1.0 4 1.0 2 3 4 5 1.0 11 1.0 15 1.0 5 6 1.0 7 1.0 19 1.0 6 7 8 1.0 9 1.0 10 1.0 8 9 10 11 12 1.0 13 1.0 14 1.0 12 13 14 15 16 1.0 17 1.0 18 1.0 16 17 18 19 20 1.0 21 1.0 22 1.0 20 21 22	C -0.742616 0.000004 1.553760 H -0.727249 -0.927877 2.117976 H -0.727285 0.927887 2.117974 C -0.666423 0.000000 0.053714 C 0.833437 0.000001 -0.451626 H 0.774569 0.000002 -1.551621 C 1.616688 1.254027 -0.028299 H 1.683339 1.328332 1.063927 H 2.640328 1.209836 -0.418533 H 1.165615 2.178043 -0.402744 C -1.393912 -1.250073 -0.495577 H -1.289488 -1.318905 -1.585820 H -1.006124 -2.176760 -0.060767 H -…	63.1478 122.0946 212.6613 225.3150 231.1032 249.6846 280.0320 305.7687 352.8128 372.3254 388.4153 423.3698 455.6587 461.8850 568.0337 689.7254 849.4476 916.8052 925.9628 937.8057 963.3648 976.0810 979.0509 1038.7201 1085.7837 1133.1126 1192.2419 1212.3307 1244.7898 1256.9815 1366.2846 1369.0374 1422.1986 1430.1626 1440.1641 1446.9638 1492.4046 1513.7044 1515.8336 1523.1303 1530.3987 1532.8803 153…	0	0	0	0	1	4	0	0	0	0	0	0	0	0	0	1	1	0	0	0	0	0	0	0	0	0	0	0	0	0	0	0	0	0	0
344	[CH3]C([CH3])C([CH3])([CH3])[CH3]	C7H15	22	-275.733	-275.531	-275.52	-275.68	-275.482	-275.471	-4.74166	2	1 2 1.0 3 1.0 4 1.0 5 1.0 2 3 4 5 6 1.0 11 1.0 15 1.0 6 7 1.0 19 1.0 7 8 1.0 9 1.0 10 1.0 8 9 10 11 12 1.0 13 1.0 14 1.0 12 13 14 15 16 1.0 17 1.0 18 1.0 16 17 18 19 20 1.0 21 1.0 22 1.0 20 21 22	C -0.970094 0.000002 1.501723 H -0.564907 0.886683 2.003048 H -0.564905 -0.886676 2.003051 H -2.057724 0.000001 1.650617 C -0.622372 0.000000 -0.012983 C 0.894548 0.000000 -0.183127 C 1.656067 1.288322 -0.048193 H 1.574305 1.726627 0.963738 H 2.724057 1.138313 -0.239882 H 1.302746 2.063067 -0.740832 C -1.259754 -1.249755 -0.660282 H -1.014810 -1.312029 -1.727430 H -0.924971 -2.176280 -0.182028 H …	52.0148 59.0300 88.1261 196.9208 220.3950 278.9550 288.6544 306.8397 339.0825 351.5481 386.5286 452.2343 463.4618 467.5836 663.2818 818.7979 921.7753 941.1407 956.3153 959.1013 967.7432 1006.9489 1032.4847 1051.9372 1069.3950 1203.1360 1211.4824 1223.1578 1297.9449 1319.4939 1417.7521 1422.7869 1428.6990 1445.7567 1457.4886 1498.9012 1508.6288 1510.1933 1517.0431 1518.4766 1523.5353 1526.0799 153…	0	0	0	0	0	5	0	0	0	0	0	0	0	0	1	0	1	0	0	0	0	0	0	0	0	0	0	0	0	0	0	0	0	0	0
345	C=CCCCCCC	C8H16	24	-314.476	-314.253	-314.241	-314.418	-314.2	-314.188	-20.4068	1	1 2 1.0 3 1.0 4 2.0 2 3 4 5 1.0 6 1.0 5 6 7 1.0 8 1.0 9 1.0 7 8 9 10 1.0 11 1.0 12 1.0 10 11 12 13 1.0 14 1.0 15 1.0 13 14 15 16 1.0 17 1.0 18 1.0 16 17 18 19 1.0 20 1.0 21 1.0 19 20 21 22 1.0 23 1.0 24 1.0 22 23 24	C -4.343893 -0.256114 0.525166 H -4.320062 0.327461 1.443756 H -5.230373 -0.862786 0.359521 C -3.338982 -0.223046 -0.350851 H -3.408310 -0.828091 -1.257295 C -2.074775 0.577849 -0.196871 H -1.988078 1.287063 -1.035006 H -2.129611 1.182326 0.718399 C -0.807390 -0.297837 -0.165119 H -0.772438 -0.917866 -1.072996 H -0.877622 -0.997510 0.679130 C 0.487757 0.516544 -0.055330 H 0.449420 1.139183 0.8509…	50.0983 61.8406 86.0288 109.9293 138.4105 153.6982 231.9448 249.8787 279.7395 380.2854 444.6768 473.9442 654.8927 738.8003 752.2550 805.7870 896.5635 903.5410 936.7499 942.2060 994.3411 1021.2222 1033.9926 1037.7384 1060.1282 1071.4200 1077.6754 1142.9695 1209.1795 1242.4733 1261.4408 1295.2313 1319.7204 1332.0413 1340.0834 1346.1305 1352.0839 1378.2938 1412.6732 1425.0544 1441.4523 1475.6726 150…	0	0	0	1	0	1	0	0	0	1	0	0	0	5	0	0	0	0	0	0	0	0	0	0	0	0	0	0	0	0	0	0	0	0	0
346	[CH]=[CH][CH2][CH2][CH2][CH2][CH2][CH3]	C8H15	23	-313.789	-313.58	-313.568	-313.734	-313.529	-313.518	37.9525	2	1 2 1.0 3 2.0 2 3 4 1.0 5 1.0 4 5 6 1.0 7 1.0 8 1.0 6 7 8 9 1.0 10 1.0 11 1.0 9 10 11 12 1.0 13 1.0 14 1.0 12 13 14 15 1.0 16 1.0 17 1.0 15 16 17 18 1.0 19 1.0 20 1.0 18 19 20 21 1.0 22 1.0 23 1.0 21 22 23	C 4.395066 -0.301448 -0.555798 H 5.353285 -0.803428 -0.609149 C 3.412910 -0.188587 0.308644 H 3.488002 -0.721302 1.268140 C 2.140347 0.604076 0.108267 H 2.068558 1.369486 0.895862 H 2.190828 1.137382 -0.848139 C 0.878705 -0.276957 0.153151 H 0.856773 -0.832330 1.102449 H 0.942842 -1.032817 -0.641452 C -0.420498 0.524310 0.001699 H -0.394434 1.082040 -0.946171 H -0.475229 1.281818 0.797848 C -1.68…	51.0620 63.5126 85.6520 111.9743 139.5706 152.9997 238.1513 249.7467 281.5957 380.4616 440.3619 470.0912 655.5656 738.9311 751.3221 794.3362 815.0490 827.5582 900.9940 906.0104 986.1375 1015.7340 1033.3102 1048.9596 1063.3274 1074.1973 1142.2104 1158.2534 1233.9325 1254.7162 1279.1130 1300.6911 1327.1013 1333.7641 1345.9929 1350.9644 1378.6901 1412.6669 1425.0596 1441.4484 1508.4874 1514.9491 151…	0	0	0	1	0	1	0	0	1	0	0	0	0	5	0	0	0	0	0	0	0	0	0	0	0	0	0	0	0	0	0	0	0	0	0
347	[CH2]=[CH][CH2][CH2][CH2][CH][CH2][CH3]	C8H15	23	-313.81	-313.601	-313.589	-313.752	-313.549	-313.537	25.7837	2	1 2 1.0 3 1.0 4 2.0 2 3 4 5 1.0 6 1.0 5 6 7 1.0 8 1.0 9 1.0 7 8 9 10 1.0 11 1.0 12 1.0 10 11 12 13 1.0 14 1.0 15 1.0 13 14 15 16 1.0 17 1.0 16 17 18 1.0 19 1.0 20 1.0 18 19 20 21 1.0 22 1.0 23 1.0 21 22 23	C -4.239808 -0.500003 0.548104 H -4.190055 -0.148015 1.576945 H -5.106758 -1.099253 0.282432 C -3.287895 -0.206500 -0.338499 H -3.381176 -0.584820 -1.358619 C -2.053716 0.605495 -0.054864 H -2.045403 1.495698 -0.703514 H -2.083593 0.973782 0.979383 C -0.750454 -0.180894 -0.288746 H -0.738480 -0.567149 -1.318303 H -0.733640 -1.059545 0.368680 C 0.513651 0.661952 -0.052166 H 0.509941 1.051202 0.978…	33.7672 39.4788 78.0398 88.6575 108.4907 155.0261 230.3360 246.7355 285.7451 377.3466 425.9550 447.4261 474.8390 654.2992 742.1396 778.7191 842.7600 909.0374 937.1691 945.5119 1008.0083 1026.2173 1035.7560 1041.3310 1056.8488 1070.4519 1099.7533 1148.8850 1171.3963 1219.2279 1256.4204 1284.9399 1304.9461 1315.2186 1332.7400 1343.7872 1375.0246 1409.1155 1436.9286 1443.2717 1475.6680 1496.0981 150…	0	0	0	1	0	1	0	0	0	1	0	0	1	4	0	0	0	0	0	0	0	0	0	0	0	0	0	0	0	0	0	0	0	0	0
348	[CH2]=[CH][CH2][CH2][CH][CH2][CH2][CH3]	C8H15	23	-313.81	-313.601	-313.589	-313.753	-313.549	-313.537	25.724	2	1 2 1.0 3 1.0 4 2.0 2 3 4 5 1.0 6 1.0 5 6 7 1.0 8 1.0 9 1.0 7 8 9 10 1.0 11 1.0 12 1.0 10 11 12 13 1.0 14 1.0 13 14 15 1.0 16 1.0 17 1.0 15 16 17 18 1.0 19 1.0 20 1.0 18 19 20 21 1.0 22 1.0 23 1.0 21 22 23	C -4.242533 -0.480639 0.597713 H -4.065767 -0.460814 1.671576 H -5.186599 -0.907800 0.269717 C -3.348140 -0.000926 -0.267325 H -3.569510 -0.045740 -1.335813 C -2.018704 0.598731 0.099107 H -1.979225 1.642493 -0.249423 H -1.909514 0.628569 1.190319 C -0.824223 -0.161677 -0.518077 H -0.981920 -0.226987 -1.613215 H -0.837367 -1.204561 -0.167812 C 0.499243 0.464237 -0.216862 H 0.546474 1.551820 -0.15…	29.6838 38.9801 75.8227 103.6141 112.8020 154.3407 231.9096 244.0570 281.5085 385.1208 426.4611 450.0110 471.2045 653.7775 741.0938 772.4279 869.8574 901.6169 937.9174 942.1868 965.5039 1027.2179 1034.0073 1040.1150 1063.8977 1085.1964 1123.1480 1146.6695 1154.4728 1231.3624 1255.6455 1266.0098 1313.0189 1320.8980 1334.8766 1339.3479 1372.7903 1408.2045 1438.4691 1442.8091 1475.2026 1495.2824 150…	0	0	0	1	0	1	0	0	0	1	0	0	1	4	0	0	0	0	0	0	0	0	0	0	0	0	0	0	0	0	0	0	0	0	0
349	[CH2]=[CH][CH2][CH2][CH2][CH2][CH][CH3]	C8H15	23	-313.81	-313.602	-313.59	-313.753	-313.549	-313.537	25.4986	2	1 2 1.0 3 1.0 4 2.0 2 3 4 5 1.0 6 1.0 5 6 7 1.0 8 1.0 9 1.0 7 8 9 10 1.0 11 1.0 12 1.0 10 11 12 13 1.0 14 1.0 15 1.0 13 14 15 16 1.0 17 1.0 18 1.0 16 17 18 19 1.0 20 1.0 19 20 21 1.0 22 1.0 23 1.0 21 22 23	C -4.312444 -0.104132 0.512858 H -4.300663 0.681888 1.265827 H -5.202444 -0.726952 0.476584 C -3.289397 -0.287941 -0.322542 H -3.347098 -1.091505 -1.059739 C -2.019410 0.518539 -0.335437 H -1.906972 1.006208 -1.316433 H -2.086111 1.324536 0.407541 C -0.763525 -0.332437 -0.066367 H -0.717566 -1.151866 -0.798766 H -0.858996 -0.809332 0.918975 C 0.537297 0.476635 -0.125698 H 0.489807 1.297118 0.6053…	40.4604 55.6521 74.3314 95.6923 118.3726 137.4216 143.2251 237.4022 283.8274 376.8858 415.6030 446.4013 473.7718 655.1861 739.0431 782.6066 898.2231 910.1537 937.1085 943.3998 994.1650 1016.6668 1031.2835 1037.6386 1064.8330 1069.3812 1098.5045 1143.4734 1171.8570 1215.2844 1259.7317 1285.3009 1315.6686 1332.8750 1337.1720 1345.8031 1376.5084 1413.4953 1431.2941 1440.7924 1475.7359 1499.2023 1505…	0	0	0	1	0	1	0	0	0	1	0	0	1	4	0	0	0	0	0	0	0	0	0	0	0	0	0	0	0	0	0	0	0	0	0
[truncated: 3,539 more rows]
[truncated: 135 more columns]

## Sheet: Introduction
ID	SMILES	Formula	Atoms Number	SCF Energy in folder freq (unit: hartree)	ZPE (0 K) Energy in folder freq (unit: hartree)	Enthalpy (298.15 K) in folder freq (unit: hartree)	SP Energy in folder energy (unit: hartree)	SP Energy (0 K) in folder energy corrected with freq scaling factor (unit: hartree)	SP Enthalpy (298.15 K) in folder energy with ZPE and enthalpy correction (unit: hartree)	Calculated standard formation of enthalpy at M062X/def2TZVP//B3LYP/6-31G(d) level of theory (unit: kcal/mol)	Multiplicity (2*S+1)	Connectivity (.gjf format)	Geometry	Frequencies	Group contribution vectors
[truncated: 1 more rows]
