# Supplementary material for: An adaptive distance-based group contribution method for thermodynamic property prediction
Source: Royal Society of Chemistry journal article supplement (doi:10.1039/c6cp02929a), 2016-01-01
Supplement: c6cp02929a4.xlsx [file c6cp02929a4.xlsx]

## Sheet: Sheet1
1		+		→		+		Reaction enthalpy (kcal/mol)	Calculated standard enthalpy of formation for 2,2,3,3,4-pentamethylpentane (kcal/mol)	Averaged enthalpy (kcal/mol)	Sample standard deviation (kcal/mol)
Experimental data from NIST Chemistry WebBook1 (kcal/mol)	-48.96		-40.14		?		-20		-59.0025	-58.4161	0.599031
Calculated energy at 0 K at CBS-QB3 level of theory (hartree)	-275.765		-197.315		-393.434		-79.6306
Calculated enthalpy at 298.15 K at CBS-QB3 level of theory with hindered rotor correction (hartree)	-275.753		-197.306		-393.417		-79.626	10.0975
2		+		→		+
Experimental data from NIST Chemistry WebBook1 (kcal/mol)	-32.07		-54.06		?		-20		-58.8255
Calculated energy at 0 K at CBS-QB3 level of theory (hartree)	-158.085		-314.991		-393.434		-79.6306
Calculated enthalpy at 298.15 K at CBS-QB3 level of theory with hindered rotor correction (hartree)	-158.077		-314.977		-393.417		-79.626	7.30455
3		+		→		+
Experimental data from NIST Chemistry WebBook1 (kcal/mol)	-51.73		-40.14		?		-25.02		-58.0986
Calculated energy at 0 K at CBS-QB3 level of theory (hartree)	-314.989		-197.315		-393.434		-118.856
Calculated enthalpy at 298.15 K at CBS-QB3 level of theory with hindered rotor correction (hartree)	-314.975		-197.306		-393.417		-118.85	8.75144
4		+		→		+
Experimental data from NIST Chemistry WebBook1 (kcal/mol)	-51.73		-44.35		?		-30.03		-57.9242
Calculated energy at 0 K at CBS-QB3 level of theory (hartree)	-314.989		-236.539		-393.434		-158.082
Calculated enthalpy at 298.15 K at CBS-QB3 level of theory with hindered rotor correction (hartree)	-314.975		-236.529		-393.417		-158.074	8.12579
5		+		→		+
Experimental data from NIST Chemistry WebBook1 (kcal/mol)	-36.73		-54.06		?		-25.02		-58.9694
Calculated energy at 0 K at CBS-QB3 level of theory (hartree)	-197.309		-314.991		-393.434		-118.856
Calculated enthalpy at 298.15 K at CBS-QB3 level of theory with hindered rotor correction (hartree)	-197.301		-314.977		-393.417		-118.85	6.80056
6		+		→		+
Experimental data from NIST Chemistry WebBook1 (kcal/mol)	-42.49		-54.06		?		-32.07		-58.9296
Calculated energy at 0 K at CBS-QB3 level of theory (hartree)	-236.536		-314.991		-393.434		-158.085
Calculated enthalpy at 298.15 K at CBS-QB3 level of theory with hindered rotor correction (hartree)	-236.526		-314.977		-393.417		-158.077	5.55037
7		+		→		+
Experimental data from NIST Chemistry WebBook1 (kcal/mol)	-48.96		-54.06		?		-40.14		-58.2332
Calculated energy at 0 K at CBS-QB3 level of theory (hartree)	-275.765		-314.991		-393.434		-197.315
Calculated enthalpy at 298.15 K at CBS-QB3 level of theory with hindered rotor correction (hartree)	-275.753		-314.977		-393.417		-197.306	4.6468
8		+		→		+
Experimental data from NIST Chemistry WebBook1 (kcal/mol)	-41.66		-54.06		?		-30.03		-58.9265
Calculated energy at 0 K at CBS-QB3 level of theory (hartree)	-236.535		-314.991		-393.434		-158.082
Calculated enthalpy at 298.15 K at CBS-QB3 level of theory with hindered rotor correction (hartree)	-236.524		-314.977		-393.417		-158.074	6.76349
9		+		→		+
Experimental data from NIST Chemistry WebBook1 (kcal/mol)	-51.97		-54.06		?		-42.49		-57.2639
Calculated energy at 0 K at CBS-QB3 level of theory (hartree)	-314.988		-314.991		-393.434		-236.536
Calculated enthalpy at 298.15 K at CBS-QB3 level of theory with hindered rotor correction (hartree)	-314.976		-314.977		-393.417		-236.526	6.27605
10		+		→		+
Experimental data from NIST Chemistry WebBook1 (kcal/mol)	-53.57		-54.06		?		-44.35		-57.9872
Calculated energy at 0 K at CBS-QB3 level of theory (hartree)	-314.99		-314.991		-393.434		-236.539
Calculated enthalpy at 298.15 K at CBS-QB3 level of theory with hindered rotor correction (hartree)	-314.977		-314.977		-393.417		-236.529	5.29279
Reference:
[1] P.J. Linstrom and W.G. Mallard, Eds., NIST Chemistry WebBook, NIST Standard Reference Database Number 69, National Institute of Standards and Technology, Gaithersburg MD, 20899, http://webbook.nist.gov, (retrieved April 23, 2016).
